# Supplementary material
Source: PubMed Central journal article supplement (PMC8788874)
Supplement: zqab036_supplemental_file.pdf [file zqab036_supplemental_file.pdf]

### Supplementary Table\_1

Protein identification and quantification data from the MaxQuant analysis of LC-MS/MS runs of tryptic digests from ADCY8 immunoprecipitates from HEK293 and U-87 cells, as well as the corresponding input material (cell lysates). Shown are significant protein identifications with 1% false discovery rate (target-decoy search, FDR 0.01). Quantification data shown as protein raw intensities ('Intensity' columns) and normalized label-free quantification intensities, as described in reference [1] ('LFQ intensity' columns).

[1] Cox, J., Hein, M. Y., Lubner, C. A., Paron, I., Nagaraj, N. & Mann, M. (2014) Accurate proteome-wide label-free quantification by delayed normalization and maximal peptide ratio extraction, termed MaxLFQ, *Molecular and Cellular Proteomics*. **13**, 2513-2526.

| Protein IDs | Majority protein IDs | Protein names                                      | Gene names | Fasta headers | Peptides | Razor + unique peptides | Unique peptides | Peptides HEK293_ADCR8-IP | Peptides HEK293_lysate | Peptides HEK293_lysate | Peptides HEK293_lysate | Razor + unique peptides HEK293_ADCR8-IP | Razor + unique peptides HEK293_lysate | Razor + unique peptides HEK293_lysate | Razor + unique peptides HEK293_lysate | Unique peptides HEK293_ADCR8-IP | Unique peptides HEK293_lysate | Unique peptides HEK293_lysate | Unique peptides HEK293_lysate | Unique peptides HEK293_lysate | Unique peptides HEK293_lysate | Sequence coverage [%] | Mol. weight [kDa] | Q-value   | Score     | Intensity | Intensity HEK293_ADCR8-IP | Intensity HEK293_lysate | Intensity HEK293_lysate | Intensity HEK293_lysate | Intensity HEK293_lysate | Intensity HEK293_lysate | Intensity HEK293_lysate | Intensity HEK293_lysate | Intensity HEK293_lysate | Intensity HEK293_lysate |
|-------------|----------------------|----------------------------------------------------|------------|---------------|----------|-------------------------|-----------------|--------------------------|------------------------|------------------------|------------------------|-----------------------------------------|---------------------------------------|---------------------------------------|---------------------------------------|---------------------------------|-------------------------------|-------------------------------|-------------------------------|-------------------------------|-------------------------------|-----------------------|-------------------|-----------|-----------|-----------|---------------------------|-------------------------|-------------------------|-------------------------|-------------------------|-------------------------|-------------------------|-------------------------|-------------------------|-------------------------|
| P04406      | P04406               | Glyceraldehyde-3-phosphate dehydrogenase           | GAPDH      | sp P04406     | 25       | 25                      | 25              | 10                       | 21                     | 21                     | 25                     | 10                                      | 21                                    | 25                                    | 10                                    | 21                              | 21                            | 25                            | 85.1                          | 36.053                        | 0                             | 323.31                | 2.828E+11         | 3.68E+9   | 6.47E+10  | 3.277E+09 | 2.11E+11                  | 3.16E+09                | 4.19E+09                | 1.266E+09               | 7.99E+09                |                         |                         |                         |                         |                         |
| P63261      | P63261               | Actin, cytoplasmic 2;Actin, cytoplasmic 2, N-termi | ACTG1      | sp P63261     | 26       | 26                      | 1               | 14                       | 23                     | 26                     | 25                     | 14                                      | 23                                    | 26                                    | 25                                    | 1                               | 1                             | 1                             | 89.6                          | 41.792                        | 0                             | 323.31                | 2.255E+11         | 3.3E+9    | 7.04E+10  | 1.073E+10 | 1.41E+11                  | 1.87E+09                | 6.19E+09                | 5.629E+09               | 7.37E+09                |                         |                         |                         |                         |                         |
| P14618;P3   | P14618               | Pyruvate kinase PKM                                | PKM        | sp P14618     | 45       | 45                      | 11              | 41                       | 29                     | 45                     | 11                     | 41                                      | 29                                    | 45                                    | 11                                    | 41                              | 29                            | 45                            | 76.6                          | 57.936                        | 0                             | 323.31                | 2.043E+11         | 2.62E+08  | 2.6E+10   | 754850000 | 1.77E+11                  | 2.37E+08                | 2.21E+09                | 453110000               | 6.89E+09                |                         |                         |                         |                         |                         |
| P35579;R9   | P35579               | Myosin-9                                           | MYH9       | sp P35579     | 156      | 156                     | 134             | 58                       | 111                    | 125                    | 155                    | 58                                      | 111                                   | 125                                   | 155                                   | 52                              | 94                            | 108                           | 134                           | 63.5                          | 226.53                        | 0                     | 323.31            | 1.703E+11 | 4.3E+09   | 1.02E+10  | 4.282E+09                 | 1.51E+11                | 4.02E+09                | 9.91E+08                | 3.262E+09               | 5.52E+09                |                         |                         |                         |                         |
| P06733      | P06733               | Alpha-amylase                                      | ENO1       | sp P06733     | 30       | 30                      | 28              | 8                        | 30                     | 27                     | 30                     | 8                                       | 30                                    | 27                                    | 30                                    | 7                               | 28                            | 25                            | 28                            | 71                            | 47.168                        | 0                     | 323.31            | 1.599E+11 | 3.24E+08  | 3.7E+10   | 588650000                 | 1.22E+11                | 3.77E+08                | 2.96E+09                | 376650000               | 4.7E+09                 |                         |                         |                         |                         |
| P68363;Q5   | P68363               | Tubulin alpha-1B chain                             | TUBA1B     | sp P68363     | 27       | 27                      | 0               | 10                       | 27                     | 23                     | 27                     | 10                                      | 27                                    | 23                                    | 27                                    | 0                               | 0                             | 0                             | 69.6                          | 50.131                        | 0                             | 323.31                | 1.345E+11         | 1.21E+09  | 3.74E+10  | 3.348E+09 | 9.25E+10                  | 1.17E+09                | 2.88E+09                | 2.631E+09               | 3.59E+09                |                         |                         |                         |                         |                         |
| P68104;Q5   | P68104;Q5            | Elongation factor 1-alpha 1;Putative elongation fa | EEF1A1;EE  | sp P68104     | 25       | 25                      | 13              | 9                        | 23                     | 19                     | 24                     | 9                                       | 23                                    | 19                                    | 24                                    | 3                               | 13                            | 9                             | 13                            | 65.2                          | 50.174                        | 0                     | 323.31            | 1.274E+11 | 2.82E+09  | 3.63E+10  | 1.53E+09                  | 6.88E+10                | 1.17E+09                | 2.7E+09                 | 1.14E+09                | 4.53E+09                |                         |                         |                         |                         |
| P07900;Q1   | P07900               | Heat shock protein HSP 90-alpha                    | HSP90AA1   | sp P07900     | 51       | 51                      | 32              | 16                       | 48                     | 33                     | 51                     | 16                                      | 48                                    | 33                                    | 51                                    | 10                              | 29                            | 17                            | 32                            | 65.7                          | 84.659                        | 0                     | 323.31            | 1.158E+11 | 1.95E+08  | 2.7E+10   | 908370000                 | 8.71E+10                | 2.92E+08                | 2.32E+09                | 296540000               | 3.52E+09                |                         |                         |                         |                         |
| P04083      | P04083               | Annexin A1                                         | ANXA1      | sp P04083     | 27       | 27                      | 2               | 1                        | 10                     | 19                     | 27                     | 1                                       | 10                                    | 19                                    | 27                                    | 1                               | 10                            | 19                            | 27                            | 68.2                          | 38.714                        | 0                     | 312.27            | 1.146E+11 | 916260    | 3.11E+08  | 243060000                 | 1.14E+11                | 880450                  | 4885600                 | 174320000               | 4.64E+09                |                         |                         |                         |                         |
| P04350      | P04350               | Tubulin beta-4A chain                              | TUBB4A     | sp P04350     | 25       | 25                      | 2               | 12                       | 23                     | 19                     | 22                     | 12                                      | 23                                    | 19                                    | 22                                    | 12                              | 0                             | 0                             | 67.1                          | 49.585                        | 0                             | 323.31                | 1.144E+11         | 5.22E+08  | 3.21E+10  | 2.824E+09 | 7.89E+10                  | 7.34E+08                | 2.09E+09                | 1.535E+09               | 3.28E+09                |                         |                         |                         |                         |                         |
| P13639      | P13639               | Elongation factor 2                                | EEF2       | sp P13639     | 58       | 58                      | 57              | 12                       | 50                     | 36                     | 58                     | 12                                      | 50                                    | 36                                    | 58                                    | 12                              | 49                            | 35                            | 57                            | 68.6                          | 95.337                        | 0                     | 323.31            | 1.124E+11 | 1.71E+08  | 1.82E+10  | 435710000                 | 9.35E+10                | 1.51E+08                | 1.93E+09                | 324770000               | 3.34E+09                |                         |                         |                         |                         |
| P10809      | P10809               | 60 kDa heat shock protein, mitochondrial           | HSPD1      | sp P10809     | 45       | 45                      | 45              | 11                       | 44                     | 30                     | 44                     | 11                                      | 44                                    | 30                                    | 44                                    | 11                              | 44                            | 30                            | 44                            | 77.7                          | 61.054                        | 0                     | 323.31            | 9.91E+10  | 4.14E+08  | 4.47E+10  | 824510000                 | 5.2E+10                 | 3.6E+08                 | 3.59E+09                | 623680000               | 1.92E+09                |                         |                         |                         |                         |
| P00338      | P00338               | L-lactate dehydrogenase A chain                    | LDHA       | sp P00338     | 29       | 29                      | 27              | 8                        | 29                     | 17                     | 29                     | 8                                       | 29                                    | 17                                    | 29                                    | 8                               | 27                            | 16                            | 27                            | 76.5                          | 36.688                        | 0                     | 323.31            | 9.252E+10 | 939140000 | 1.89E+10  | 155540000                 | 7.34E+10                | 936980000               | 1.74E+09                | 134030000               | 2.91E+09                |                         |                         |                         |                         |
| P11142      | P11142               | Heat shock cognate 71 kDa protein                  | HSPA8      | sp P11142     | 42       | 41                      | 28              | 15                       | 39                     | 36                     | 41                     | 14                                      | 38                                    | 35                                    | 40                                    | 12                              | 25                            | 22                            | 27                            | 71.8                          | 70.897                        | 0                     | 323.31            | 8.872E+10 | 4.16E+08  | 2.13E+10  | 4.092E+09                 | 6.29E+10                | 5.88E+08                | 1.67E+09                | 2.454E+09               | 2.45E+09                |                         |                         |                         |                         |
| P60174      | P60174               | Triosephosphate isomerase                          | TP1        | sp P60174     | 17       | 17                      | 1               | 16                       | 10                     | 16                     | 1                      | 16                                      | 10                                    | 16                                    | 1                                     | 16                              | 10                            | 16                            | 82.7                          | 26.669                        | 0                             | 276.03                | 8.067E+10         | 678670000 | 3.31E+10  | 4.0950000 | 7.47E+10                  | 747720000               | 4.74E+09                | 797930000               | 1.79E+09                |                         |                         |                         |                         |                         |
| P11021      | P11021               | 78 kDa glucose-regulated protein                   | HSPA5      | sp P11021     | 48       | 48                      | 47              | 31                       | 45                     | 43                     | 44                     | 31                                      | 45                                    | 43                                    | 44                                    | 30                              | 44                            | 42                            | 43                            | 63.3                          | 72.332                        | 0                     | 323.31            | 7.681E+10 | 7.76E+09  | 3.08E+10  | 5.685E+09                 | 3.26E+10                | 4.4E+09                 | 3.79E+09                | 5.31E+09                | 1.9E+09                 |                         |                         |                         |                         |
| Q00610;P5   | Q00610               | Clathrin heavy chain 1                             | CLTC       | sp Q00610     | 83       | 83                      | 83              | 23                       | 74                     | 57                     | 82                     | 23                                      | 74                                    | 57                                    | 82                                    | 23                              | 74                            | 57                            | 82                            | 59.6                          | 19.611                        | 0                     | 323.31            | 7.501E+10 | 6.3E+08   | 9.65E+09  | 662790000                 | 6.41E+10                | 7.81E+08                | 8.84E+08                | 475210000               | 2.29E+09                |                         |                         |                         |                         |
| P07355;A6   | P07355;A6            | Annexin A2;Putative annexin A2-like protein        | ANXA2;AN   | sp P07355     | 31       | 31                      | 31              | 2                        | 21                     | 27                     | 31                     | 2                                       | 21                                    | 27                                    | 31                                    | 2                               | 21                            | 27                            | 31                            | 75.8                          | 38.604                        | 0                     | 256.77            | 6.979E+10 | 181820000 | 8.64E+08  | 792300000                 | 6.81E+10                | 4147100                 | 32001000                | 170760000               | 3.86E+09                |                         |                         |                         |                         |
| P23528      | P23528               | Cofilin-1                                          | CFL1       | sp P23528     | 19       | 19                      | 14              | 4                        | 17                     | 16                     | 18                     | 4                                       | 17                                    | 16                                    | 18                                    | 4                               | 12                            | 11                            | 14                            | 81.3                          | 18.502                        | 0                     | 187.87            | 6.881E+10 | 685890000 | 1.8E+10   | 829150000                 | 4.99E+10                | 995480000               | 1.81E+09                | 459340000               | 1.8E+09                 |                         |                         |                         |                         |
| Q14204      | Q14204               | Cytosolic dynein 1 heavy chain 1                   | DYNC1H1    | sp Q14204     | 216      | 216                     | 216             | 21                       | 143                    | 153                    | 213                    | 21                                      | 143                                   | 153                                   | 213                                   | 21                              | 143                           | 153                           | 213                           | 53.7                          | 53.24                         | 0                     | 323.31            | 6.145E+10 | 896190000 | 3.69E+09  | 1.303E+09                 | 5.64E+10                | 1.26E+08                | 3.56E+09                | 961640000               | 2.14E+09                |                         |                         |                         |                         |
| P07195;Q5   | P07195               | L-lactate dehydrogenase B chain                    | LDHB       | sp P07195     | 21       | 21                      | 19              | 7                        | 21                     | 19                     | 21                     | 7                                       | 19                                    | 21                                    | 19                                    | 7                               | 19                            | 21                            | 19                            | 51.5                          | 36.628                        | 0                     | 207.07            | 6.087E+10 | 1.29E+08  | 2.31E+10  | 299270000                 | 3.76E+10                | 1.97E+08                | 2.03E+09                | 416380000               | 1.36E+09                |                         |                         |                         |                         |
| P08238;Q5   | P08238               | Heat shock protein HSP 90-beta                     | HSP90AB1   | sp P08238     | 50       | 50                      | 31              | 28                       | 12                     | 49                     | 36                     | 49                                      | 36                                    | 49                                    | 36                                    | 20                              | 30                            | 5                             | 27                            | 72.5                          | 83.263                        | 0                     | 323.31            | 6.076E+10 | 708480000 | 1.86E+10  | 478360000                 | 4.16E+10                | 805390000               | 1.54E+09                | 191080000               | 1.64E+09                |                         |                         |                         |                         |
| P04075      | P04075               | Fructose-bisphosphate aldolase A                   | ALDOA      | sp P04075     | 31       | 31                      | 27              | 11                       | 31                     | 20                     | 29                     | 11                                      | 27                                    | 20                                    | 29                                    | 11                              | 27                            | 20                            | 25                            | 85.4                          | 39.623                        | 0                     | 323.31            | 5.843E+10 | 1.32E+08  | 2.47E+10  | 309790000                 | 3.33E+10                | 1.29E+08                | 1.57E+09                | 909130000               | 1.35E+09                |                         |                         |                         |                         |
| P08758      | P08758               | Annexin A5                                         | ANXAS      | sp P08758     | 26       | 26                      | 26              | 0                        | 25                     | 15                     | 25                     | 0                                       | 25                                    | 15                                    | 25                                    | 0                               | 25                            | 15                            | 25                            | 75                            | 35.936                        | 0                     | 323.31            | 5.775E+10 | 0         | 8.92E+09  | 943960000                 | 4.98E+10                | 0                       | 8.06E+08                | 933980000               | 1.88E+09                |                         |                         |                         |                         |
| Q09666      | Q09666               | Neuroblast differentiation-associated protein AH1  | AHNK1      | sp Q09666     | 240      | 240                     | 240             | 4                        | 20                     | 172                    | 236                    | 4                                       | 20                                    | 172                                   | 236                                   | 4                               | 20                            | 172                           | 236                           | 66                            | 69.296                        | 0                     | 323.31            | 5.59E+10  | 419220000 | 7.82E+09  | 1.73E+09                  | 5.4E+10                 | 19620000                | 5704000                 | 1123E+09                | 2.25E+09                |                         |                         |                         |                         |
| P06576      | P06576               | ATP synthase subunit beta, mitochondrial           | ATP5B      | sp P06576     | 29       | 29                      | 29              | 11                       | 29                     | 16                     | 28                     | 11                                      | 29                                    | 16                                    | 28                                    | 11                              | 29                            | 16                            | 28                            | 80.2                          | 56.559                        | 0                     | 323.31            | 5.514E+10 | 2.45E+08  | 2.38E+10  | 328530000                 | 3.07E+10                | 4.28E+08                | 1.89E+09                | 288700000               | 1.13E+09                |                         |                         |                         |                         |
| P62937;P6   | P62937               | Peptidyl-prolyl cis-trans isomerase A;Peptidyl-pro | PIPA       | sp P62937     | 12       | 12                      | 12              | 6                        | 12                     | 11                     | 12                     | 6                                       | 12                                    | 11                                    | 12                                    | 6                               | 12                            | 11                            | 12                            | 71.5                          | 18.012                        | 0.000245              | 147.93            | 5.398E+10 | 1.4E+08   | 2.16E+10  | 699590000                 | 3.21E+10                | 338030000               | 3.8000000               | 1.96E+09                | 759970000               | 2.28E+09                |                         |                         |                         |
| Q02224      | Q02224               | Centromere-associated protein E                    | CENPE      | sp Q02224     | 3        | 3                       | 3               | 1                        | 0                      | 2                      | 3                      | 1                                       | 0                                     | 2                                     | 3                                     | 1                               | 0                             | 2                             | 1.8                           | 316.41                        | 0                             | 812830000             | 5.317E+10         | 5.31E+10  | 0         | 812830000 | 132490000                 | 5.1E+10                 | 0                       | 354430000               | 8.75E+08                |                         |                         |                         |                         |                         |
| P04040      | P04040               | Catalase                                           | CAT        | sp P04040     | 10       | 10                      | 10              | 1                        | 10                     | 9                      | 9                      | 1                                       | 10                                    | 9                                     | 9                                     | 1                               | 10                            | 9                             | 9                             | 23.7                          | 59.755                        | 0                     | 41.566            | 5.266E+10 | 5.2E+10   | 2.84E+08  | 214460000                 | 1.98E+08                | 4.96E+10                | 1.59E+09                | 1.86E+09                | 4.38E+08                |                         |                         |                         |                         |
| P06748      | P06748               | Nucleophosmin                                      | NPM1       | sp P06748     | 17       | 17                      | 17              | 4                        | 16                     | 16                     | 17                     | 4                                       | 16                                    | 16                                    | 17                                    | 4                               | 16                            | 16                            | 17                            | 5.8                           | 32.575                        | 0                     | 323.31            | 5.208E+10 | 4.76E+09  | 2.13E+10  | 2.982E+09                 | 2.3E+10                 | 5.73E+09                | 1.24E+09                | 1.75E+09                | 6.8E+08                 |                         |                         |                         |                         |
| P21333      | P21333               | Filamin-A                                          | FLNA       | sp P21333     | 96       | 87                      | 84              | 5                        | 68                     | 78                     | 94                     | 3                                       | 64                                    | 70                                    | 85                                    | 3                               | 63                            | 69                            | 82                            | 49.8                          | 280.74                        | 0                     | 323.31            | 4.907E+10 | 957990000 | 1.64E+09  | 1.122E+09                 | 4.63E+10                | 724220000               | 1.61E+08                | 759240000               | 1.86E+09                |                         |                         |                         |                         |
| P12277;P0   | P12277               | Creatine kinase B-type                             | CKB        | sp P12277     | 24       | 24                      | 24              | 2                        | 1                      | 3                      | 24                     | 2                                       | 1                                     | 3                                     | 24                                    | 2                               | 1                             | 3                             | 24                            | 82.4                          | 42.644                        | 0                     | 323.31            | 4.855E+10 | 3.57E+08  | 4.82E+10  | 162772000                 | 246750000               | 114660000               | 4.47E+09                | 643820                  | 6117200                 |                         |                         |                         |                         |
| Q14315      | Q14315               | Filamin-C                                          | FLNC       | sp Q14315     | 99       | 99                      | 88              | 4                        | 26                     | 76                     | 96                     | 4                                       | 26                                    | 76                                    | 96                                    | 4                               | 26                            | 76                            | 96                            | 71.2                          | 291.02                        | 0                     | 323.31            | 4.838E+10 | 252490000 | 4.64E+08  | 921720000                 | 4.7E+10                 | 281060000               | 471540000               | 696550000               | 1.8E+09                 |                         |                         |                         |                         |
| P07437;A6   | P07437               | Tubulin beta chain                                 | TUBB       | sp P07437     | 23       | 5                       | 4               | 16                       | 23                     | 22                     | 23                     | 5                                       | 4                                     | 16                                    | 23                                    | 5                               | 4                             | 16                            | 23                            | 4                             |                               |                       |                   |           |           |           |                           |                         |                         |                         |                         |                         |                         |                         |                         |                         |

|                     |           |                                                                |            |           |     |     |    |    |    |     |    |    |    |     |    |    |    |     |      |        |        |        |           |           |           |           |           |           |          |           |           |           |          |          |
|---------------------|-----------|----------------------------------------------------------------|------------|-----------|-----|-----|----|----|----|-----|----|----|----|-----|----|----|----|-----|------|--------|--------|--------|-----------|-----------|-----------|-----------|-----------|-----------|----------|-----------|-----------|-----------|----------|----------|
| P50991              | P50991    | T-complex protein 1 subunit delta                              | CCT4       | sp P50991 | 25  | 25  | 25 | 3  | 23 | 14  | 23 | 3  | 23 | 14  | 23 | 3  | 23 | 14  | 23   | 57     | 57.924 | 0      | 280.52    | 2.055E+10 | 1.15E+08  | 6.26E+09  | 89038000  | 1.41E+10  | 1.43E+08 | 5.41E+08  | 83728000  | 5.21E+08  |          |          |
| P11586              | P11586    | C-1-tetrahydrofolate synthase, cytoplasmic;Meth MTHFD1         | P11586     | sp P11586 | 48  | 48  | 48 | 8  | 43 | 24  | 44 | 8  | 43 | 24  | 44 | 8  | 43 | 24  | 44   | 62     | 101.63 | 0      | 323.31    | 2.048E+10 | 24430000  | 5.74E+09  | 147570000 | 1.46E+10  | 25675000 | 4.66E+08  | 12109000  | 6.01E+08  |          |          |
| P46821              | P46821    | Microtubule-associated protein 1B;MAP1B heavy MAP1B            | P46821     | sp P46821 | 87  | 87  | 86 | 2  | 52 | 79  | 85 | 2  | 52 | 79  | 85 | 2  | 51 | 78  | 84   | 52     | 20.56  | 0      | 323.31    | 2.04E+10  | 2886000   | 7.74E+09  | 875420000 | 1.87E+10  | 2343800  | 73514000  | 604060000 | 7.22E+08  |          |          |
| P42704;CC P42704    | P42704    | Leucine-rich PRR motif-containing protein, mitocd LRRPPRC      | P42704     | sp P42704 | 62  | 62  | 62 | 7  | 56 | 35  | 60 | 7  | 56 | 35  | 60 | 7  | 56 | 35  | 60   | 48.1   | 157.9  | 0      | 323.31    | 2.009E+10 | 15386000  | 5.53E+09  | 141040000 | 1.44E+10  | 17255000 | 4.7E+08   | 130050000 | 5.09E+08  |          |          |
| P50395              | P50395    | Rab GDP dissociation inhibitor beta                            | GD12       | sp P50395 | 28  | 28  | 20 | 2  | 10 | 28  | 2  | 10 | 28 | 2   | 10 | 28 | 2  | 10  | 28   | 20     | 67.50  | 0      | 274.86    | 1.994E+10 | 27605000  | 5.64E+09  | 27058000  | 1.43E+10  | 20751000 | 5.17E+08  | 38888000  | 5.12E+08  |          |          |
| P06744;CC P06744    | P06744    | Glucose-6-phosphate isomerase                                  | GPI        | sp P06744 | 27  | 27  | 2  | 26 | 5  | 25  | 2  | 26 | 5  | 25  | 2  | 26 | 5  | 25  | 26   | 60.6   | 63.146 | 0      | 304.47    | 1.993E+10 | 45576000  | 8.84E+09  | 24328000  | 1.11E+10  | 1393400  | 7.92E+08  | 46426000  | 3.66E+08  |          |          |
| P17987              | P17987    | T-complex protein 1 subunit alpha                              | TCP1       | sp P17987 | 27  | 27  | 13 | 26 | 18 | 26  | 13 | 26 | 18 | 26  | 13 | 26 | 18 | 26  | 18   | 26     | 62.6   | 60.343 | 0         | 275.15    | 1.97E+10  | 1.77E+08  | 6.67E+09  | 98898000  | 1.27E+10 | 1.67E+08  | 5.35E+08  | 88890000  | 5.45E+08 |          |
| P39023              | P39023    | 60S ribosomal protein L3                                       | RPL3       | sp P39023 | 17  | 17  | 17 | 9  | 15 | 17  | 15 | 9  | 15 | 17  | 15 | 9  | 15 | 17  | 15   | 47.6   | 46.108 | 0      | 173.44    | 1.946E+10 | 9.92E+08  | 4.6E+09   | 1.4627000 | 1.24E+10  | 7.07E+08 | 4.69E+08  | 1.192E+09 | 4.74E+08  |          |          |
| P13010              | P13010    | X-ray repair cross-complementing protein 5                     | XRCC5      | sp P13010 | 37  | 37  | 37 | 10 | 30 | 32  | 10 | 30 | 32 | 10  | 30 | 32 | 10 | 30  | 32   | 66.8   | 82.704 | 0      | 323.31    | 1.928E+10 | 1.32E+08  | 5.38E+09  | 237740000 | 1.35E+10  | 3.62E+08 | 3.78E+08  | 117530000 | 4.54E+08  |          |          |
| P29401              | P29401    | Transketolase                                                  | TKT        | sp P29401 | 31  | 31  | 31 | 3  | 26 | 14  | 30 | 3  | 26 | 14  | 30 | 3  | 26 | 14  | 30   | 53.8   | 67.877 | 0      | 226.85    | 1.925E+10 | 14659000  | 4.32E+09  | 61320000  | 1.49E+10  | 1.008400 | 10084000  | 4.95E+08  | 135262000 | 5.55E+08 |          |
| P19105;O1 P19105;O1 | P19105;O1 | Myosin regulatory light chain 12A;Myosin regulat NMYL12A;M     | P19105     | sp P19105 | 9   | 9   | 4  | 7  | 8  | 9   | 7  | 8  | 9  | 7   | 8  | 9  | 7  | 8   | 9    | 4      | 51.5   | 19.794 | 0         | 274.87    | 1.918E+10 | 3.03E+08  | 2.27E+09  | 65192000  | 1.6E+10  | 4.4E+08   | 2.23E+08  | 384630000 | 5.08E+08 |          |
| P05141;OS P05141    | P05141    | ADP/ATP translocase 2;ADP/ATP translocase 2, N                 | SLC25A5    | sp P05141 | 15  | 15  | 8  | 8  | 15 | 14  | 15 | 8  | 15 | 14  | 15 | 8  | 15 | 14  | 15   | 4      | 40.6   | 32.852 | 0         | 57.206    | 1.874E+10 | 1.36E+09  | 8.71E+09  | 511330000 | 8.16E+09 | 4.88E+08  | 4.11E+09  | 534530000 | 5.95E+08 |          |
| P09211              | P09211    | Glutathione S-transferase P                                    | GSTP1      | sp P09211 | 11  | 11  | 11 | 7  | 9  | 10  | 10 | 7  | 9  | 10  | 10 | 7  | 9  | 10  | 10   | 66.2   | 23.506 | 0      | 323.31    | 1.821E+10 | 2.04E+09  | 1.17E+09  | 128260000 | 8.77E+09  | 2.38E+09 | 4.06E+08  | 125040000 | 1.84E+08  |          |          |
| P40227;OS P40227    | P40227    | T-complex protein 1 subunit zeta                               | CT6GA      | sp P40227 | 24  | 24  | 24 | 5  | 23 | 19  | 24 | 5  | 23 | 19  | 24 | 5  | 23 | 19  | 24   | 49     | 58.254 | 0      | 140.51    | 1.809E+10 | 33482000  | 5.68E+09  | 128940000 | 1.23E+10  | 45638000 | 1.27E+08  | 92317000  | 4.36E+08  |          |          |
| Q98932              | Q98932    | T-complex protein 1 subunit eta                                | CTC7       | sp Q98932 | 31  | 31  | 31 | 3  | 29 | 15  | 30 | 3  | 29 | 15  | 30 | 3  | 29 | 15  | 30   | 69.2   | 59.666 | 0      | 293.76    | 1.805E+10 | 14909000  | 5.17E+09  | 77556000  | 1.28E+10  | 11134000 | 5.53E+08  | 43477000  | 4.22E+08  |          |          |
| Q81VF2              | Q81VF2    | Protein AHNAK2                                                 | AHNAK2     | sp Q81VF2 | 125 | 125 | 2  | 3  | 73 | 123 | 2  | 3  | 73 | 123 | 2  | 3  | 73 | 123 | 47.2 | 61.362 | 0      | 323.31 | 1.783E+10 | 41570000  | 29287000  | 530660000 | 1.72E+10  | 22606000  | 4804800  | 126880000 | 9.55E+08  |           |          |          |
| Q14697              | Q14697    | Neutral alpha-glucosidase AB                                   | GANAB      | sp Q14697 | 41  | 41  | 41 | 0  | 37 | 15  | 38 | 0  | 37 | 15  | 38 | 0  | 37 | 15  | 38   | 5.7    | 106.87 | 0      | 323.31    | 1.779E+10 | 0         | 0.46E+09  | 44225000  | 1.31E+10  | 0        | 4.06E+08  | 36792000  | 5.17E+08  |          |          |
| Q02878              | Q02878    | 60S ribosomal protein L6                                       | RPL6       | sp Q02878 | 20  | 20  | 11 | 20 | 19 | 19  | 11 | 20 | 19 | 19  | 11 | 20 | 19 | 19  | 54.5 | 32.708 | 0      | 180.67 | 1.762E+10 | 4.96E+08  | 4.5E+09   | 1.243E+09 | 1.14E+10  | 6.57E+08  | 3.33E+08 | 778860000 | 3.24E+08  |           |          |          |
| P26038              | P26038    | Moesin                                                         | MSN        | sp P26038 | 44  | 44  | 33 | 3  | 38 | 32  | 44 | 3  | 38 | 32  | 44 | 1  | 28 | 25  | 33   | 70.2   | 67.819 | 0      | 312.89    | 1.745E+10 | 11384000  | 2.14E+09  | 319950000 | 1.5E+10   | 15682000 | 2.07E+08  | 118950000 | 6.54E+08  |          |          |
| P55060              | P55060    | Exportin-2                                                     | CSE1L      | sp P55060 | 46  | 46  | 46 | 5  | 40 | 22  | 43 | 5  | 40 | 22  | 43 | 5  | 40 | 22  | 43   | 54     | 110.42 | 0      | 323.31    | 1.732E+10 | 50396000  | 5.06E+09  | 130550000 | 1.21E+10  | 4790100  | 4.36E+08  | 106050000 | 4.58E+08  |          |          |
| P09651;AO P09651;AO | P09651;AO | Heterogeneous nuclear ribonucleoprotein A1;Het HNRNP A1;       | P09651     | sp P09651 | 18  | 17  | 17 | 0  | 17 | 16  | 17 | 0  | 17 | 16  | 17 | 0  | 17 | 16  | 17   | 42.5   | 38.746 | 0      | 230.92    | 1.73E+10  | 6.22E+08  | 3.98E+09  | 1.51E+09  | 1.12E+10  | 3.49E+08 | 5.13E+08  | 966710000 | 6.04E+08  |          |          |
| P30041              | P30041    | Peroxioredoxin-6                                               | PRDX6      | sp P30041 | 18  | 18  | 18 | 0  | 17 | 4   | 17 | 0  | 17 | 4   | 17 | 0  | 17 | 4   | 17   | 72.3   | 20.035 | 0      | 243.27    | 1.76E+10  | 0         | 9.33E+09  | 9119000   | 7.82E+09  | 0        | 7.76E+08  | 5877100   | 3.44E+08  |          |          |
| P36578              | P36578    | 60S ribosomal protein L4                                       | RPL4       | sp P36578 | 28  | 28  | 28 | 9  | 26 | 26  | 25 | 9  | 26 | 26  | 25 | 9  | 26 | 26  | 25   | 56.7   | 49.697 | 0      | 123.06    | 1.709E+10 | 4.16E+08  | 5.56E+09  | 1.664E+09 | 9.45E+09  | 3.92E+08 | 4.65E+08  | 1.053E+09 | 4.3E+08   |          |          |
| P50990              | P50990    | T-complex protein 1 subunit theta                              | CT8        | sp P50990 | 36  | 36  | 9  | 31 | 18 | 35  | 9  | 31 | 18 | 35  | 9  | 31 | 18 | 35  | 9    | 31     | 18     | 35     | 9         | 31        | 18        | 35        | 9         | 31        | 18       | 35        | 9         | 31        | 18       | 35       |
| Q9B2H6              | Q9B2H6    | WD repeat-containing protein 11                                | WDR11      | sp Q9B2H6 | 11  | 11  | 11 | 3  | 7  | 8   | 10 | 3  | 7  | 8   | 10 | 3  | 7  | 8   | 10   | 11.8   | 136.68 | 0      | 28.299    | 1.681E+10 | 1.5E+10   | 98851000  | 1.333E+09 | 4.13E+08  | 9.56E+09 | 62557000  | 4.103E+09 | 2.16E+09  |          |          |
| P18124              | P18124    | 60S ribosomal protein L7                                       | RPL7       | sp P18124 | 19  | 19  | 19 | 12 | 18 | 16  | 18 | 12 | 18 | 16  | 18 | 12 | 18 | 16  | 18   | 55.6   | 29.225 | 0      | 75.765    | 1.65E+10  | 6.05E+08  | 4.51E+09  | 1.855E+09 | 9.53E+09  | 7.32E+08 | 3.1E+08   | 1.166E+09 | 3.07E+08  |          |          |
| Q43852              | Q43852    | Calumenin                                                      | CALU       | sp Q43852 | 24  | 24  | 0  | 24 | 19 | 23  | 0  | 24 | 19 | 23  | 0  | 24 | 19 | 23  | 79   | 37.106 | 0      | 323.31 | 1.64E+10  | 0         | 0.142E+09 | 671160000 | 1.43E+10  | 0         | 0.43E+08 | 509890000 | 5.12E+08  |           |          |          |
| P55209              | P55209    | Nucleosome assembly protein 1-like 1                           | NAP1L1     | sp P55209 | 14  | 14  | 13 | 4  | 14 | 13  | 4  | 14 | 13 | 4   | 14 | 13 | 4  | 14  | 13   | 11     | 13     | 0      | 295.24    | 1.631E+10 | 3.06E+08  | 5.04E+09  | 281150000 | 1.07E+10  | 3.66E+08 | 4.08E+08  | 22060000  | 3.69E+08  |          |          |
| P34932              | P34932    | Heat shock 70 kDa protein 4                                    | HSPA4      | sp P34932 | 38  | 38  | 38 | 4  | 33 | 18  | 38 | 4  | 33 | 18  | 38 | 4  | 33 | 18  | 35   | 51.9   | 94.334 | 0      | 217.05    | 1.613E+10 | 76204000  | 5.21E+09  | 85837000  | 1.07E+10  | 48727000 | 3.93E+08  | 37922000  | 5.33E+08  |          |          |
| Q00410              | Q00410    | Importin-5                                                     | IPOS       | sp Q00410 | 36  | 36  | 36 | 3  | 28 | 11  | 35 | 3  | 28 | 11  | 35 | 3  | 28 | 11  | 35   | 3      | 26     | 9      | 33        | 44.3      | 123.63    | 0         | 282.87    | 1.608E+10 | 42578000 | 3.35E+09  | 37593000  | 1.26E+10  | 34131000 | 3.24E+08 |
| P63241;OE P63241;OE | P63241;OE | Eukaryotic translation initiation factor 5A-1;Eukar EIF5A;EIF5 | P63241     | sp P63241 | 15  | 15  | 15 | 2  | 12 | 8   | 14 | 2  | 12 | 8   | 14 | 2  | 12 | 8   | 14   | 2      | 12     | 8      | 14        | 2         | 12        | 8         | 14        | 2         | 12       | 8         | 14        | 2         | 12       | 8        |
| P13667              | P13667    | Protein disulfide-isomerase A4                                 | PDI4A      | sp P13667 | 42  | 42  | 42 | 4  | 39 | 7   | 42 | 4  | 39 | 7   | 42 | 4  | 39 | 7   | 42   | 57.1   | 72.932 | 0      | 260.75    | 1.553E+10 | 11228000  | 6.92E+09  | 269530000 | 8.34E+09  | 9779400  | 5.51E+08  | 33231000  | 5.24E+08  |          |          |
| P26599              | P26599    | Polypyrnidine tract-binding protein 1                          | PTRP1      | sp P26599 | 21  | 21  | 19 | 7  | 21 | 18  | 19 | 7  | 21 | 18  | 19 | 6  | 19 | 16  | 18   | 62     | 62.5   | 0      | 323.31    | 1.549E+10 | 1.09E+09  | 7.77E+09  | 353480000 | 6.28E+09  | 5.97E+08 | 8.4E+08   | 118330000 | 3.25E+08  |          |          |
| P84077;PP P84077;PP | P84077;PP | ADP-ribosylation factor 1;ADP-ribosylation factor ARF1;ARF1    | P84077     | sp P84077 | 9   | 9   | 4  | 1  | 9  | 6   | 9  | 1  | 9  | 6   | 9  | 1  | 9  | 6   | 9    | 4      | 5.4    | 20.697 | 0         | 39.034    | 1.547E+10 | 1.02E+10  | 1.79E+09  | 11992000  | 3.49E+09 | 7.75E+09  | 5.5E+08   | 206530000 | 1.95E+09 |          |
| Q14152              | Q14152    | Eukaryotic translation initiation factor 3 subunit A EIF3A     | EIF3A      | sp Q14152 | 68  | 68  | 68 | 34 | 62 | 54  | 61 | 34 | 62 | 54  | 61 | 34 | 62 | 54  | 61   | 50.6   | 166.57 | 0      | 323.31    | 1.543E+10 | 2.27E+09  | 3.75E+09  | 344320000 | 9.06E+09  | 1.85E+09 | 4.47E+08  | 346320000 | 5.57E+08  |          |          |
| P31939              | P31939    | Bifunctional protein biosynthesis protein PURH;Ph              | ATIC       | sp P31939 | 34  | 34  | 3  | 33 | 5  | 31  | 33 | 5  | 31 | 33  | 5  | 31 | 33 | 5   | 31   | 69.6   | 64.615 | 0      | 277.23    | 1.541E+10 | 21101000  | 3.61E+09  | 6814000   | 1.18E+10  | 10591000 | 3.34E+08  | 3489100   | 4.72E+08  |          |          |
| P68032;PP P68032;PP | P68032;PP | Actin, alpha cardiac muscle 1;Actin, gamma-inte                | ACTC1;ACT1 | sp P68032 | 15  | 2   | 9  | 13 | 14 | 14  | 1  | 1  | 2  | 1   | 1  | 1  | 2  | 1   | 1    | 2      | 42.019 | 0      | 19.178    | 1.501E+10 | 10284000  | 9.52E+09  | 964070000 | 4.52E+09  | 55443000 | 8.3E+08   | 466700000 | 2.47E+08  |          |          |
| Q04637;OQ Q04637    | Q04637;OQ | Eukaryotic translation initiation factor 4 gamma 1 EIF4G1      | EIF4G1     | sp Q04637 | 48  | 48  | 46 | 12 | 39 | 35  | 46 | 12 | 39 | 35  | 46 | 12 | 39 | 35  | 46   | 11.7   | 33     | 0      | 270.54    | 1.483E+10 | 2.08E+08  | 2.66E+09  | 305240000 | 1.17E+10  | 2.99E+08 | 2.46E+08  | 190690000 | 3.72E+08  |          |          |
| P23396              | P23396    | 40S ribosomal protein S3                                       | RPS3       | sp P23396 | 20  | 20  | 20 | 10 | 20 | 16  | 18 | 10 | 20 | 16  | 18 | 10 | 20 | 16  | 18   | 34     | 36.4   | 175.49 | 0         | 161.57    | 1.483E+10 | 3.66E+08  | 4.51E+09  | 608040000 | 9.35E+09 | 6.11E+08  | 2.99E+08  | 266       |          |          |

|                |          |                                                               |          |           |    |    |    |    |    |    |    |    |    |    |    |    |    |    |      |      |        |          |           |           |           |          |           |           |          |          |           |          |          |
|----------------|----------|---------------------------------------------------------------|----------|-----------|----|----|----|----|----|----|----|----|----|----|----|----|----|----|------|------|--------|----------|-----------|-----------|-----------|----------|-----------|-----------|----------|----------|-----------|----------|----------|
| P12268         | P12268   | Inosine-5-monophosphate dehydrogenase 2                       | IMPDH2   | sp P12268 | 25 | 25 | 22 | 6  | 23 | 17 | 24 | 6  | 23 | 17 | 24 | 6  | 20 | 15 | 21   | 53.9 | 55.804 | 0        | 222.3     | 9.798E+09 | 69376000  | 3E+09    | 87444000  | 6.64E+09  | 95417000 | 2.78E+08 | 40325000  | 2.52E+08 |          |
| O75083         | O75083   | WD repeat-containing protein 1                                | WDR1     | sp O75083 | 29 | 29 | 29 | 0  | 20 | 12 | 29 | 0  | 20 | 12 | 29 | 0  | 20 | 12 | 29   | 67.8 | 66.193 | 0        | 190.63    | 9.679E+09 | 0         | 6.18E+08 | 46654000  | 9.01E+09  | 0        | 62904000 | 40511000  | 3.5E+08  |          |
| P22234         | P22234   | Multifunctional protein ADE2;Phosphoribosylaminyl transferase | PAIC5    | sp P22234 | 22 | 22 | 22 | 2  | 22 | 10 | 22 | 2  | 22 | 10 | 22 | 2  | 22 | 10 | 22   | 47.1 | 47.079 | 0        | 142.51    | 9.656E+09 | 2524800   | 5.42E+09 | 32301000  | 4.2E+09   | 41641000 | 4.66E+08 | 18627000  | 1.79E+08 |          |
| Q9P2J5         | Q9P2J5   | Inosine-tRNA ligase, cytoplasmic                              | LARS     | sp Q9P2J5 | 40 | 40 | 40 | 4  | 38 | 26 | 37 | 4  | 38 | 26 | 37 | 4  | 38 | 26 | 37   | 42.4 | 134.46 | 0        | 260.57    | 9.655E+09 | 34386000  | 3.5E+09  | 144550000 | 5.97E+09  | 48996000 | 3.09E+08 | 116390000 | 2.12E+08 |          |
| O95373         | O95373   | Importin-7                                                    | IPO7     | sp O95373 | 23 | 23 | 23 | 0  | 20 | 16 | 23 | 0  | 20 | 16 | 23 | 0  | 20 | 16 | 23   | 26.4 | 113.52 | 0        | 270.48    | 9.644E+09 | 0         | 1.08E+09 | 105100000 | 8.46E+09  | 0        | 1.12E+08 | 95894000  | 3E+08    |          |
| P12814;P312814 | P12814   | Alpha-actinin-1                                               | ACTN1    | sp P12814 | 50 | 36 | 36 | 1  | 34 | 44 | 49 | 1  | 23 | 31 | 35 | 1  | 23 | 31 | 35   | 65.2 | 103.56 | 0        | 323.31    | 9.639E+09 | 103470    | 8.4E+08  | 726260000 | 8.07E+09  | 1134500  | 22076000 | 770640000 | 78236000 |          |
| Q6NS14         | Q6NS14   | Uncharacterized protein Cxor5f7                               | Cxor5f7  | sp Q6NS14 | 2  | 2  | 0  | 1  | 0  | 1  | 0  | 1  | 0  | 1  | 0  | 1  | 0  | 1  | 0    | 4.2  | 97.053 | 0.003915 | 1.9572    | 9.631E+09 | 0         | 2787900  | 0         | 0         | 0        | 245750   | 0         | 0        |          |
| P53621         | P53621   | Coatomer subunit alpha;Xenin/Proxenin                         | COPA     | sp P53621 | 35 | 35 | 35 | 3  | 31 | 25 | 32 | 3  | 31 | 25 | 32 | 3  | 31 | 25 | 32   | 37.1 | 138.34 | 0        | 252.1     | 9.566E+09 | 7336400   | 1.97E+09 | 185150000 | 5.46E+09  | 1018000  | 2.07E+08 | 81225000  | 3.11E+08 |          |
| Q96GH2         | Q96GH2   | PML-RARA-regulated adapter molecule 1                         | PRARM1   | sp Q96GH2 | 2  | 2  | 2  | 1  | 0  | 1  | 1  | 1  | 0  | 1  | 1  | 1  | 0  | 1  | 1    | 3.6  | 73.968 | 0.001175 | 3.0392    | 9.546E+09 | 9.53E+09  | 0        | 9503000   | 7.86E+09  | 9047E+09 | 0        | 6384100   | 0        | 0        |
| Q869P6         | Q869P6   | Cullin-associated NEDD8-dissociated protein 1                 | CAND1    | sp Q869P6 | 29 | 29 | 25 | 3  | 26 | 13 | 29 | 3  | 26 | 13 | 29 | 3  | 26 | 13 | 29   | 3    | 23     | 10       | 142.45    | 9.525E+09 | 10046000  | 2.55E+09 | 28144000  | 6.94E+09  | 428000   | 2.78E+08 | 15621000  | 2.41E+08 |          |
| P62241         | P62241   | 40S ribosomal protein S8                                      | RPS8     | sp P62241 | 11 | 11 | 8  | 11 | 8  | 11 | 9  | 8  | 11 | 10 | 9  | 8  | 11 | 10 | 9    | 51.9 | 24.205 | 0        | 82.603    | 9.492E+09 | 2.68E+08  | 3.08E+09 | 59661000  | 5.55E+09  | 2.4E+08  | 2.81E+08 | 43367000  | 1.96E+08 |          |
| P02786;Q6      | P02786   | Transferrin receptor protein 1;Transferrin recept             | TFRC     | sp P02786 | 31 | 31 | 31 | 0  | 23 | 16 | 31 | 0  | 23 | 16 | 31 | 0  | 23 | 16 | 31   | 50.4 | 84.87  | 0        | 176.9     | 9.354E+09 | 0         | 7.07E+08 | 63072000  | 8.59E+09  | 0        | 6657000  | 6224000   | 3.27E+08 |          |
| Q13263         | Q13263   | Transcription intermediary factor 1-beta                      | TRIM28   | sp Q13263 | 28 | 28 | 28 | 5  | 28 | 22 | 27 | 5  | 28 | 22 | 27 | 5  | 28 | 22 | 27   | 52.1 | 88.549 | 0        | 198.52    | 9.309E+09 | 1.21E+08  | 3.45E+09 | 283250000 | 5.04E+09  | 1.8E+08  | 2.55E+08 | 10730000  | 2.14E+08 |          |
| Q9NQC3         | Q9NQC3   | Reticulon-4                                                   | RTN4     | sp Q9NQC3 | 14 | 14 | 14 | 2  | 7  | 14 | 2  | 7  | 14 | 2  | 7  | 14 | 2  | 7  | 14   | 23.2 | 129.93 | 0        | 140.29    | 9.273E+09 | 2745300   | 1.05E+08 | 119480000 | 9.46E+09  | 7189200  | 10776000 | 4830000   | 3.95E+08 |          |
| P00918         | P00918   | Carbonic anhydrase 2                                          | CA2      | sp P00918 | 16 | 16 | 16 | 3  | 16 | 1  | 2  | 3  | 16 | 1  | 2  | 3  | 16 | 1  | 2    | 63.5 | 29.246 | 0        | 101.99    | 9.259E+09 | 4084800   | 9.23E+09 | 1094200   | 2548000   | 553080   | 7.24E+08 | 234660    | 280060   |          |
| P41252         | P41252   | Isoleucine-tRNA ligase, cytoplasmic                           | IARS     | sp P41252 | 43 | 43 | 43 | 13 | 41 | 24 | 40 | 13 | 41 | 24 | 40 | 13 | 41 | 24 | 40   | 43.2 | 144.5  | 0        | 323.31    | 9.194E+09 | 5.03E+08  | 3.58E+09 | 185770000 | 4.93E+09  | 3.6E+08  | 3.49E+08 | 22774000  | 2.04E+08 |          |
| P52209         | P52209   | 6-phosphogluconate dehydrogenase, decarboxyl                  | PGD      | sp P52209 | 19 | 19 | 19 | 0  | 16 | 5  | 18 | 0  | 16 | 5  | 18 | 0  | 16 | 5  | 18   | 47.2 | 53.139 | 0        | 209.06    | 9.187E+09 | 0         | 1.9E+09  | 1238000   | 7.28E+09  | 0        | 1.69E+08 | 1447400   | 2.94E+08 |          |
| P62191         | P62191   | 26S proteasome regulatory subunit 4                           | PSMC1    | sp P62191 | 21 | 21 | 21 | 3  | 19 | 15 | 20 | 3  | 19 | 15 | 20 | 3  | 19 | 15 | 20   | 57.3 | 49.184 | 0        | 119.96    | 9.102E+09 | 3216000   | 1.74E+09 | 128560000 | 7.23E+09  | 1936600  | 7337000  | 2.21E+08  | 4.41E+08 |          |
| O14980         | O14980   | Exportin-1                                                    | XPO1     | sp O14980 | 35 | 35 | 35 | 1  | 30 | 20 | 34 | 1  | 30 | 20 | 34 | 1  | 30 | 20 | 34   | 41.9 | 123.38 | 0        | 232.27    | 9.044E+09 | 953980    | 2.94E+09 | 120990000 | 5.98E+09  | 5717200  | 4.19E+08 | 4911000   | 1.08E+08 |          |
| P08865         | P08865   | 40S ribosomal protein SA                                      | RPSA     | sp P08865 | 12 | 12 | 12 | 8  | 11 | 9  | 11 | 8  | 11 | 9  | 11 | 8  | 11 | 9  | 11   | 45.8 | 32.854 | 0        | 189.79    | 9.036E+09 | 1.86E+09  | 2.78E+09 | 83472000  | 4.31E+09  | 1.93E+09 | 1.46E+08 | 87693000  | 1.54E+08 |          |
| P78347;Q6      | P78347   | General transcription factor II-I                             | GTIF2    | sp P78347 | 47 | 47 | 47 | 29 | 37 | 45 | 31 | 29 | 37 | 45 | 31 | 29 | 37 | 45 | 31   | 53.1 | 112.42 | 0        | 267.67    | 9.015E+09 | 1.61E+09  | 1.85E+09 | 3.341E+09 | 2.21E+09  | 1.8E+09  | 1.51E+08 | 1.957E+09 | 1.01E+08 |          |
| P55884         | P55884   | Eukaryotic translation initiation factor 3 subunit B          | EIF3B    | sp P55884 | 37 | 37 | 37 | 47 | 37 | 33 | 24 | 36 | 19 | 33 | 24 | 36 | 19 | 33 | 24   | 36   | 57.4   | 92.48    | 0         | 277.96    | 8.996E+09 | 1.91E+09 | 1.93E+09  | 1.614E+09 | 4.99E+09 | 1.89E+09 | 1.6E+08   | 14904000 | 1.98E+08 |
| P23246         | P23246   | Splicing factor, proline- and glutamine-rich                  | SFPQ     | sp P23246 | 28 | 28 | 27 | 19 | 26 | 25 | 25 | 19 | 26 | 25 | 25 | 19 | 26 | 25 | 24   | 25   | 47.8   | 76.149   | 0         | 177.82    | 8.996E+09 | 8.09E+08 | 4.07E+09  | 80536000  | 3.31E+09 | 8.87E+08 | 3.15E+08  | 50710000 | 1.36E+08 |
| P16152         | P16152   | Carbonyl reductase [NADPH]                                    | CBR1     | sp P16152 | 15 | 15 | 15 | 15 | 15 | 15 | 15 | 15 | 15 | 15 | 15 | 15 | 15 | 15 | 15   | 70.4 | 30.307 | 0        | 135.85    | 8.961E+09 | 1.23E+09  | 2.32E+09 | 2.231E+09 | 3.17E+09  | 1.53E+09 | 2.29E+08 | 1.171E+09 | 1.36E+08 |          |
| P40925         | P40925   | Malate dehydrogenase, cytoplasmic                             | MDH1     | sp P40925 | 11 | 11 | 11 | 0  | 10 | 6  | 11 | 0  | 10 | 6  | 11 | 0  | 10 | 6  | 11   | 38.9 | 36.426 | 0        | 87.197    | 8.917E+09 | 0         | 3.08E+09 | 12832000  | 5.83E+09  | 0        | 2.87E+08 | 11402000  | 2.05E+08 |          |
| P17980         | P17980   | 25S protease regulatory subunit 6A                            | PSM3     | sp P17980 | 24 | 24 | 24 | 3  | 24 | 16 | 23 | 3  | 24 | 16 | 23 | 3  | 24 | 16 | 23   | 64.5 | 49.203 | 0        | 252.96    | 8.852E+09 | 1554000   | 3.99E+09 | 125410000 | 5.33E+09  | 1148500  | 3.77E+08 | 28991000  | 1.88E+08 |          |
| P45781         | P45781   | 40S ribosomal protein S9                                      | RPS9     | sp P45781 | 17 | 17 | 17 | 11 | 16 | 13 | 17 | 11 | 16 | 13 | 17 | 11 | 16 | 13 | 17   | 58.8 | 22.591 | 0        | 42.909    | 8.704E+09 | 5.26E+08  | 2.48E+09 | 41564000  | 5.29E+09  | 1.93E+08 | 2.83E+08 | 49673000  | 2.43E+08 |          |
| P15121;Q9      | P15121   | Aldose reductase                                              | AKR1B1   | sp P15121 | 12 | 12 | 12 | 0  | 9  | 7  | 12 | 0  | 9  | 7  | 12 | 0  | 9  | 7  | 12   | 45.6 | 35.853 | 0        | 116.29    | 8.691E+09 | 0         | 0.15E+08 | 22917000  | 8.15E+09  | 0        | 6369800  | 1479800   | 3.11E+08 |          |
| P62424         | P62424   | 60S ribosomal protein L7a                                     | RPL7A    | sp P62424 | 17 | 17 | 17 | 11 | 15 | 17 | 15 | 11 | 15 | 17 | 15 | 11 | 15 | 17 | 15   | 45.1 | 29.995 | 0        | 69.944    | 8.67E+09  | 4.48E+08  | 2.26E+09 | 1.011E+09 | 4.95E+09  | 5.74E+08 | 1.93E+08 | 53994000  | 2.08E+08 |          |
| P99999;Q9      | P99999   | Cytochrome c                                                  | CYCS     | sp P99999 | 9  | 9  | 9  | 4  | 9  | 0  | 4  | 9  | 0  | 4  | 9  | 0  | 4  | 9  | 0    | 62.9 | 11.749 | 0        | 65.878    | 8.665E+09 | 0         | 3.79E+09 | 13561000  | 4.86E+09  | 0        | 3.14E+08 | 7744800   | 2.09E+08 |          |
| P08708         | P08708   | 40S ribosomal protein S17                                     | RPS17    | sp P08708 | 10 | 10 | 10 | 2  | 9  | 7  | 10 | 2  | 9  | 7  | 10 | 2  | 9  | 7  | 10   | 65.9 | 15.55  | 0        | 92.92     | 8.64E+09  | 27861000  | 4.31E+09 | 32190000  | 3.99E+09  | 29627000 | 8.87E+08 | 28102000  | 1.83E+08 |          |
| P67809         | P67809   | Nuclease-sensitive element-binding protein 1                  | YBX1     | sp P67809 | 18 | 18 | 18 | 12 | 17 | 17 | 18 | 12 | 17 | 17 | 18 | 12 | 17 | 17 | 18   | 4    | 11     | 11       | 142.02    | 8.578E+09 | 3.32E+08  | 2.06E+09 | 1.236E+09 | 4.95E+09  | 3.2E+08  | 1.87E+08 | 84308000  | 1.7E+08  |          |
| P30086         | P30086   | Phosphatidylinethanolamine-binding protein 1;Hsp              | PEBP1    | sp P30086 | 12 | 12 | 12 | 0  | 12 | 4  | 11 | 0  | 12 | 4  | 11 | 0  | 12 | 4  | 11   | 80.7 | 21.524 | 0        | 130.84    | 8.565E+09 | 0         | 4.26E+09 | 14513000  | 4.29E+09  | 0        | 3.94E+08 | 1362400   | 1.51E+08 |          |
| P40939         | P40939   | Trifunctional enzyme subunit alpha, mitochondrial             | HADHA    | sp P40939 | 27 | 27 | 27 | 7  | 23 | 16 | 26 | 7  | 23 | 16 | 26 | 7  | 23 | 16 | 26   | 46.4 | 82.999 | 0        | 298.04    | 8.541E+09 | 36999000  | 2.05E+09 | 4173000   | 6.42E+09  | 8169400  | 1.92E+08 | 4003900   | 1.95E+08 |          |
| PODMV9;P       | PODMV9;P | Heat shock 70 kDa protein 1B;Heat shock 70 kDa                | HSPA1B;H | sp PODMV9 | 25 | 21 | 11 | 12 | 25 | 22 | 23 | 12 | 21 | 18 | 19 | 7  | 11 | 9  | 10   | 46.8 | 70.051 | 0        | 174.36    | 8.492E+09 | 6.43E+08  | 4.85E+09 | 25108000  | 2.75E+09  | 5.56E+08 | 4.25E+08 | 19734000  | 1.07E+08 |          |
| P43686         | P43686   | 26S protease regulatory subunit 6B                            | PSM4     | sp P43686 | 27 | 27 | 27 | 5  | 26 | 15 | 24 | 5  | 26 | 15 | 24 | 5  | 26 | 15 | 24   | 5    | 7.7    | 47.366   | 0         | 323.33    | 8.491E+09 | 92368000 | 2.69E+09  | 76596000  | 6.63E+09 | 1.29E+08 | 1.12E+08  | 63696000 | 2.02E+08 |
| P35580;P1      | P35580   | Myosin-10                                                     | MYH10    | sp P35580 | 86 | 69 | 64 | 47 | 69 | 18 | 20 | 42 | 57 | 5  | 4  | 38 | 52 | 4  | 39.5 | 229  | 0      | 323.31   | 8.469E+09 | 5.13E+09  | 3.26E+09  | 1839600  | 57254000  | 4.56E+09  | 2.89E+08 | 822000   | 204100    | 0        | 0        |
| P22102         | P22102   | Trifunctional purine biosynthetic protein adenosyl            | GART     | sp P22102 | 33 | 33 | 33 | 3  | 32 | 5  | 30 | 3  | 32 | 5  | 30 | 3  | 32 | 5  | 30   | 40.6 | 107.77 | 0        | 225.11    | 8.464E+09 | 2497700   | 4.11E+09 | 35855000  | 4.32E+09  | 1362400  | 3.71E+08 | 9436900   | 1.72E+08 |          |
| P49588         | P49588   | Alanine-tRNA ligase, cytoplasmic                              | AARS     | sp P49588 | 40 | 40 | 40 | 2  | 40 | 6  | 40 | 2  | 40 | 6  | 40 | 2  | 40 | 6  | 40   | 52.7 | 106.81 | 0        | 323.31    | 8.462E+09 | 1239100   | 2.48E+09 | 2184000   | 5.96E+09  | 743290   | 2.13E+08 | 782410    | 2.57E+08 |          |
| Q9H4M9         | Q9H4M9   | EH domain-containing protein 1                                | EHD1     | sp Q9H4M9 | 29 | 29 | 29 | 0  | 17 | 12 | 28 | 0  | 17 | 12 | 28 | 0  | 17 | 12 | 28   | 69.5 | 60.622 | 0        | 185.17    | 8.361E+09 | 0         |          |           |           |          |          |           |          |          |



|           |        |                                                      |        |           |    |    |    |    |    |    |    |    |    |    |    |    |    |    |      |        |        |        |           |           |           |           |           |          |          |           |           |          |
|-----------|--------|------------------------------------------------------|--------|-----------|----|----|----|----|----|----|----|----|----|----|----|----|----|----|------|--------|--------|--------|-----------|-----------|-----------|-----------|-----------|----------|----------|-----------|-----------|----------|
| P61158;Q5 | P61158 | Actin-related protein 3                              | ACTR3  | sp P61158 | 17 | 17 | 17 | 1  | 13 | 7  | 16 | 1  | 13 | 7  | 16 | 1  | 13 | 7  | 16   | 52.2   | 47.371 | 0      | 139.92    | 5.246E+09 | 682400    | 9.26E+08  | 31026000  | 4.29E+09 | 797140   | 83355000  | 8823600   | 1.87E+08 |
| P78417    | P78417 | Glutathione S-transferase omega-1                    | GSTO1  | sp P78417 | 17 | 17 | 17 | 1  | 17 | 0  | 17 | 1  | 17 | 0  | 17 | 1  | 17 | 0  | 17   | 57.3   | 27.566 | 0      | 83.524    | 5.237E+09 | 686120    | 1.05E+09  | 0         | 4.19E+09 | 779180   | 92588000  | 0         | 1.72E+08 |
| P62263    | P62263 | 40S ribosomal protein S14                            | RP514  | sp P62263 | 8  | 8  | 8  | 4  | 8  | 6  | 8  | 4  | 8  | 6  | 8  | 4  | 8  | 6  | 8    | 39.7   | 16.273 | 0      | 74.849    | 5.188E+09 | 1.1E+08   | 1.9E+09   | 291390000 | 2.88E+09 | 1.41E+08 | 1.29E+08  | 210450000 | 1.03E+08 |
| Q9BSJ8    | Q9BSJ8 | Extended synaptotagmin L2                            | ESYT1  | sp Q9BSJ8 | 32 | 32 | 32 | 1  | 25 | 6  | 32 | 1  | 25 | 6  | 32 | 1  | 25 | 6  | 32   | 42.1   | 12.285 | 0      | 260.48    | 5.149E+09 | 3159300   | 9.4E+08   | 20606000  | 4.19E+09 | 10001000 | 1.09E+08  | 1.3170000 | 1.44E+08 |
| P61353    | P61353 | 60S ribosomal protein L27                            | RPL27  | sp P61353 | 7  | 7  | 7  | 6  | 5  | 7  | 5  | 6  | 5  | 7  | 5  | 6  | 5  | 7  | 5    | 45.6   | 15.798 | 0      | 40.179    | 5.148E+09 | 1.73E+08  | 1.19E+09  | 87000000  | 2.91E+09 | 1.39E+08 | 1.08E+08  | 589960000 | 1.44E+08 |
| Q16543    | Q16543 | Hsp90 co-chaperone Cdc37;Hsp90 co-chaperone C        | CDC37  | sp Q16543 | 11 | 11 | 11 | 0  | 10 | 5  | 11 | 0  | 10 | 5  | 11 | 0  | 10 | 5  | 11   | 36.2   | 44.468 | 0      | 228.12    | 5.135E+09 | 0         | 1.63E+09  | 18174000  | 3.49E+09 | 0        | 1.39E+08  | 22249000  | 1.35E+08 |
| P28070    | P28070 | Proteasome subunit beta type-4                       | PSMB4  | sp P28070 | 7  | 7  | 7  | 3  | 7  | 7  | 7  | 3  | 7  | 7  | 7  | 3  | 7  | 7  | 7    | 45.5   | 29.204 | 0      | 101.18    | 5.123E+09 | 8189500   | 1.95E+09  | 95226000  | 3.07E+09 | 18124000 | 1.86E+08  | 46178000  | 1.02E+08 |
| P39019    | P39019 | 40S ribosomal protein S19                            | RP519  | sp P39019 | 13 | 13 | 13 | 4  | 12 | 12 | 12 | 4  | 12 | 12 | 12 | 4  | 12 | 12 | 12   | 57.9   | 16.06  | 0      | 66.607    | 5.118E+09 | 2.27E+08  | 1.79E+09  | 41635000  | 2.69E+09 | 2.58E+08 | 1.52E+08  | 252310000 | 1.13E+08 |
| P62750    | P62750 | 60S ribosomal protein L23a                           | RPL23a | sp P62750 | 13 | 13 | 13 | 8  | 11 | 13 | 11 | 8  | 11 | 13 | 11 | 8  | 11 | 13 | 11   | 56.4   | 17.695 | 0      | 92.112    | 5.112E+09 | 8.03E+08  | 9.68E+08  | 663460000 | 2.68E+09 | 5.02E+08 | 2.03E+08  | 581130000 | 1.55E+08 |
| P62913    | P62913 | 60S ribosomal protein L11                            | RPL11  | sp P62913 | 8  | 8  | 8  | 4  | 7  | 8  | 4  | 7  | 8  | 4  | 7  | 8  | 4  | 7  | 8    | 42.7   | 20.252 | 0      | 49.642    | 5.103E+09 | 9766000   | 1.41E+09  | 67169000  | 2.93E+09 | 96526000 | 1.34E+08  | 42680000  | 1.31E+08 |
| Q13813    | Q13813 | Spectrin alpha chain, non-erythrocytic 1             | SPTAN1 | sp Q13813 | 88 | 88 | 88 | 5  | 76 | 79 | 65 | 5  | 76 | 79 | 65 | 5  | 76 | 79 | 65   | 47.3   | 284.54 | 0      | 323.31    | 5.045E+09 | 5339200   | 2.41E+09  | 88655000  | 1.74E+09 | 32745000 | 1.86E+08  | 636770000 | 55450000 |
| Q8NC51    | Q8NC51 | Plasminogen activator inhibitor 1 RNA-binding pr     | SERP1  | sp Q8NC51 | 22 | 22 | 22 | 6  | 21 | 14 | 20 | 6  | 21 | 14 | 20 | 6  | 21 | 14 | 20   | 56.9   | 44.965 | 0      | 97.274    | 5.04E+09  | 1.47E+08  | 2.68E+09  | 19010000  | 2.03E+09 | 2.77E+08 | 1.71E+08  | 79192000  | 60900000 |
| P00505    | P00505 | Aspartate aminotransferase, mitochondrial            | GOT2   | sp P00505 | 21 | 21 | 21 | 0  | 21 | 6  | 17 | 0  | 21 | 6  | 17 | 0  | 21 | 6  | 17   | 49.3   | 47.517 | 0      | 93.548    | 5.033E+09 | 0         | 2.66E+09  | 7309300   | 2.36E+09 | 0        | 2.42E+08  | 6445800   | 81162000 |
| P00492    | P00492 | Hypoxanthine-guanine phosphoribosyltransferase       | HPRT1  | sp P00492 | 9  | 9  | 9  | 0  | 9  | 4  | 9  | 0  | 9  | 4  | 9  | 0  | 9  | 4  | 9    | 50     | 24.579 | 0      | 32.982    | 5.031E+09 | 0         | 8.321E+09 | 2710300   | 3.84E+09 | 0        | 2.86E+08  | 1750400   | 69159000 |
| Q9UNM6    | Q9UNM6 | 26S proteasome non-ATPase regulatory subunit 1       | PSMD13 | sp Q9UNM6 | 16 | 16 | 16 | 3  | 14 | 10 | 16 | 3  | 14 | 10 | 16 | 3  | 14 | 10 | 16   | 52.7   | 42.945 | 0      | 160.2     | 5.02E+09  | 76025000  | 1.49E+09  | 35468000  | 3.41E+09 | 60046000 | 1.26E+08  | 34463000  | 1.47E+08 |
| P14314    | P14314 | Glucosidase 2 subunit beta                           | PRKCSH | sp P14314 | 19 | 19 | 19 | 2  | 19 | 3  | 18 | 2  | 19 | 3  | 18 | 2  | 19 | 3  | 18   | 33.1   | 59.425 | 0      | 87.444    | 5.008E+09 | 1.6654000 | 1.45E+09  | 5167200   | 2.58E+09 | 3463300  | 1.04E+08  | 2548700   | 1.84E+08 |
| P13804    | P13804 | Electron transfer flavoprotein subunit alpha, mito   | ETFFA  | sp P13804 | 9  | 9  | 9  | 1  | 9  | 1  | 9  | 1  | 9  | 1  | 9  | 1  | 9  | 1  | 9    | 41.1   | 35.079 | 0      | 68.86     | 4.986E+09 | 27151000  | 2.21E+09  | 387250    | 2.75E+09 | 9517200  | 2.05E+08  | 454750    | 1.22E+08 |
| P17066;P1 | P17066 | Heat shock 70 kDa protein 6                          | HSPA6  | sp P17066 | 10 | 1  | 1  | 1  | 1  | 10 | 10 | 1  | 1  | 1  | 1  | 1  | 1  | 1  | 1    | 14.5   | 71.027 | 0      | 4.0122    | 4.967E+09 | 6950800   | 1.76E+09  | 26145000  | 2.87E+09 | 6950800  | 1.02E+08  | 15769000  | 1.18E+08 |
| P17844    | P17844 | Probable ATP-dependent RNA helicase DDX5             | DDX5   | sp P17844 | 30 | 29 | 22 | 13 | 26 | 28 | 28 | 12 | 25 | 27 | 27 | 7  | 18 | 20 | 50   | 69.147 | 0      | 113.28 | 4.942E+09 | 2.36E+08  | 1.24E+09  | 5888000   | 2.87E+09  | 1.17E+08 | 1.24E+08 | 482540000 | 1.22E+08  |          |
| Q7L2H7    | Q7L2H7 | Eukaryotic translation initiation factor 3 subunit H | EIF3M  | sp Q7L2H7 | 13 | 13 | 13 | 5  | 8  | 12 | 5  | 8  | 12 | 5  | 8  | 12 | 5  | 8  | 12   | 42.2   | 47.200 | 0      | 122.66    | 4.94E+09  | 1.8E+09   | 6.64E+08  | 5326000   | 2.13E+09 | 1.73E+09 | 85906000  | 47224000  | 87395000 |
| Q12931    | Q12931 | Heat shock protein 75 kDa, mitochondrial             | TRAP1  | sp Q12931 | 26 | 26 | 26 | 2  | 25 | 2  | 22 | 3  | 25 | 2  | 22 | 3  | 25 | 2  | 22   | 40.2   | 80.109 | 0      | 136.53    | 4.923E+09 | 6500700   | 3.5E+09   | 12788000  | 1.41E+09 | 3401300  | 3.38E+08  | 2096300   | 37541000 |
| P60709;Q5 | P60709 | Actin, cytoplasmic 1;Actin, cytoplasmic 1, N-term    | ACTB   | sp P60709 | 26 | 1  | 1  | 13 | 23 | 26 | 25 | 0  | 1  | 1  | 1  | 1  | 1  | 1  | 1    | 89.6   | 41.736 | 0      | 50.607    | 4.922E+09 | 0         | 1.46E+09  | 14897000  | 3.31E+09 | 0        | 7777000   | 48487000  | 81244000 |
| P09104    | P09104 | Gamma-enolase                                        | ENO2   | sp P09104 | 13 | 11 | 11 | 1  | 12 | 3  | 13 | 0  | 1  | 11 | 0  | 1  | 11 | 0  | 55.3 | 47.268 | 0      | 264.32 | 4.918E+09 | 0         | 6.62E+08  | 4780400   | 4.25E+09  | 0        | 1.07E+08 | 17436000  | 1.05E+08  |          |
| P48047    | P48047 | ATP synthase subunit O, mitochondrial                | ATP5O  | sp P48047 | 10 | 10 | 10 | 5  | 10 | 6  | 10 | 5  | 10 | 6  | 10 | 5  | 10 | 6  | 10   | 62     | 23.277 | 0      | 76.721    | 4.917E+09 | 14594000  | 1.92E+09  | 2962000   | 2.95E+09 | 28412000 | 1.72E+08  | 22899000  | 77369000 |
| P46782    | P46782 | 40S ribosomal protein S5;40S ribosomal protein S     | RP55   | sp P46782 | 13 | 13 | 13 | 6  | 11 | 11 | 11 | 6  | 11 | 11 | 11 | 6  | 11 | 11 | 11   | 49     | 22.876 | 0      | 64.061    | 4.905E+09 | 1.64E+08  | 1.73E+09  | 25128000  | 2.76E+09 | 2.33E+08 | 1.06E+08  | 16617000  | 82778000 |
| P18621    | P18621 | 60S ribosomal protein L17                            | RPL17  | sp P18621 | 10 | 10 | 10 | 6  | 9  | 8  | 9  | 6  | 9  | 8  | 9  | 6  | 9  | 8  | 9    | 51.6   | 21.397 | 0      | 48.619    | 4.905E+09 | 3.31E+08  | 1.59E+09  | 47388000  | 2.51E+09 | 3.51E+08 | 1.12E+08  | 33209000  | 86073000 |
| P20618    | P20618 | Proteasome subunit beta type-1                       | PSMB1  | sp P20618 | 8  | 8  | 8  | 0  | 7  | 5  | 7  | 0  | 7  | 5  | 7  | 0  | 7  | 5  | 7    | 44     | 26.489 | 0      | 104.72    | 4.893E+09 | 0         | 1.88E+09  | 6517800   | 2.94E+09 | 0        | 1.53E+08  | 55557000  | 1.23E+08 |
| O75821    | O75821 | Eukaryotic translation initiation factor 3 subunit G | EIF3G  | sp O75821 | 14 | 14 | 14 | 7  | 12 | 9  | 13 | 7  | 12 | 9  | 13 | 7  | 12 | 9  | 13   | 50     | 35.611 | 0      | 100.01    | 4.885E+09 | 6.53E+08  | 8.78E+08  | 1073000   | 3.15E+09 | 6.15E+08 | 1.19E+08  | 10007000  | 1.06E+08 |
| P52788    | P52788 | Spermine synthase                                    | SMS    | sp P52788 | 14 | 14 | 14 | 0  | 12 | 2  | 14 | 0  | 12 | 2  | 14 | 0  | 12 | 2  | 14   | 57.4   | 41.268 | 0      | 27.44     | 4.883E+09 | 0         | 6E+08     | 3161500   | 4.29E+09 | 0        | 54969000  | 1290800   | 1.75E+08 |
| P47897    | P47897 | Glutamine--tRNA ligase                               | QARS   | sp P47897 | 33 | 33 | 33 | 7  | 24 | 20 | 33 | 7  | 24 | 20 | 33 | 7  | 24 | 20 | 33   | 50.2   | 87.708 | 0      | 184.51    | 4.875E+09 | 14503000  | 9.3E+08   | 14067000  | 3.29E+09 | 12361000 | 71442000  | 12723000  | 1.3E+08  |
| P26640    | P26640 | Valine--tRNA ligase                                  | VARS   | sp P26640 | 37 | 37 | 37 | 5  | 34 | 15 | 37 | 5  | 34 | 15 | 37 | 5  | 34 | 15 | 37   | 41     | 140.47 | 0      | 204.03    | 4.847E+09 | 17111000  | 1.52E+09  | 28348000  | 3.97E+09 | 30635000 | 132E+08   | 1881000   | 1.2E+08  |
| Q13838    | Q13838 | Spliceosome RNA helicase DDX39B                      | DDX39B | sp Q13838 | 18 | 18 | 18 | 5  | 18 | 5  | 12 | 5  | 18 | 5  | 12 | 0  | 4  | 18 | 49.8 | 48.991 | 0      | 93.572 | 4.81E+09  | 54186000  | 2.79E+09  | 19659000  | 1.95E+09  | 87439000 | 2.07E+08 | 10189000  | 8508000   |          |
| P07339    | P07339 | Cathepsin D;Cathepsin D light chain;Cathepsin D      | CTSD   | sp P07339 | 13 | 13 | 13 | 1  | 10 | 12 | 11 | 1  | 10 | 12 | 11 | 1  | 10 | 12 | 11   | 49.8   | 44.552 | 0      | 75.872    | 4.752E+09 | 10399000  | 4.97E+08  | 26209000  | 3.98E+09 | 14157000 | 44702000  | 19696000  | 1.46E+08 |
| Q12797    | Q12797 | Asparyl/asparaginyl beta-hydroxylase                 | ASPH   | sp Q12797 | 24 | 24 | 24 | 0  | 12 | 22 | 22 | 0  | 12 | 22 | 22 | 0  | 12 | 22 | 41.7 | 85.862 | 0      | 323.31 | 4.745E+09 | 0         | 2.41E+09  | 61278000  | 3.89E+09  | 0        | 3031800  | 42934000  | 1.32E+08  |          |
| Q9NZM1;Q  | Q9NZM1 | Myoferlin                                            | MYOF   | sp Q9NZM1 | 56 | 56 | 56 | 2  | 27 | 56 | 2  | 27 | 56 | 2  | 27 | 56 | 2  | 27 | 56   | 34     | 274.71 | 0      | 307.21    | 4.735E+09 | 3516100   | 9894400   | 50995000  | 4.67E+09 | 2252300  | 1121800   | 8567100   | 2.19E+08 |
| Q9NTJ5    | Q9NTJ5 | Phosphatidylinositol 2-phosphate SAc1                | SACM1L | sp Q9NTJ5 | 10 | 10 | 10 | 1  | 6  | 1  | 9  | 1  | 6  | 1  | 9  | 1  | 6  | 1  | 9    | 24.5   | 46.961 | 0      | 131.35    | 4.729E+09 | 4.29E+09  | 72101000  | 1115000   | 3.52E+08 | 3.85E+09 | 1.46E+08  | 26402000  | 61306000 |
| Q99873;Q  | Q99873 | Protein arginine N-methyltransferase 1               | PRMT1  | sp Q99873 | 21 | 21 | 21 | 13 | 15 | 18 | 12 | 13 | 15 | 18 | 12 | 13 | 15 | 18 | 12   | 13     | 15     | 0      | 75.704    | 4.722E+09 | 1.28E+09  | 8.03E+08  | 1.268E+09 | 1.37E+09 | 1.09E+09 | 7435000   | 94122000  | 72364000 |
| Q02952    | Q02952 | A-kinase anchor protein 12                           | AKAP12 | sp Q02952 | 47 | 47 | 47 | 1  | 31 | 20 | 47 | 1  | 31 | 20 | 47 | 1  | 31 | 20 | 47   | 44.8   | 191.48 | 0      | 323.31    | 4.704E+09 | 227480    | 4.67E+08  | 6228000   | 4.17E+09 | 425580   | 45132000  | 4889000   | 1.59E+08 |
| Q02790    | Q02790 | Peptidyl-prolyl cis-trans isomerase FKBP4;Peptid     | FKBP4  | sp Q02790 | 29 | 29 | 29 | 0  | 28 | 1  | 24 | 0  | 28 | 1  | 24 | 0  | 28 | 1  | 24   | 61.7   | 51.804 | 0      | 190.69    | 4.696E+09 | 0         | 2.8E+09   | 171840    | 1.83E+09 | 0        | 3.04E+08  | 1285200   | 16873000 |
| P46776    | P46776 | 60S ribosomal protein L27a                           | RPL27a | sp P46776 | 7  | 7  | 7  | 2  | 6  | 7  | 7  | 2  | 6  | 7  | 7  | 2  | 6  | 7  | 7    | 41.2   | 16.561 | 0      | 23.078    | 4.693E+09 | 4672900   | 1.46E+09  | 44867000  | 2.79E+09 | 3136500  | 1.71E+08  | 27893000  | 96716000 |

|               |           |                                                           |           |        |        |    |    |    |    |    |    |    |    |    |    |    |    |    |    |      |        |        |       |           |           |           |           |          |          |          |          |          |           |           |          |          |
|---------------|-----------|-----------------------------------------------------------|-----------|--------|--------|----|----|----|----|----|----|----|----|----|----|----|----|----|----|------|--------|--------|-------|-----------|-----------|-----------|-----------|----------|----------|----------|----------|----------|-----------|-----------|----------|----------|
| P33316        | P33316    | Deoxyuridine 5-triphosphate nucleotidohydrolase DUT       | spj       | P33316 | 8      | 8  | 8  | 0  | 8  | 3  | 8  | 0  | 8  | 3  | 8  | 0  | 8  | 3  | 8  | 38.1 | 26.563 | 0      | 58.75 | 4.022E+09 | 0         | 1.85E+09  | 13485000  | 2.16E+09 | 0        | 1.6E+08  | 11300000 | 89553000 |           |           |          |          |
| Q12906;Q12906 | Q12906    | Interleukin enhancer-binding factor 3                     | ILF3      | spj    | Q12906 | 27 | 27 | 27 | 14 | 25 | 22 | 22 | 14 | 25 | 22 | 22 | 14 | 25 | 22 | 22   | 36.9   | 95.337 | 0     | 149.91    | 4.019E+09 | 4.8E+08   | 1.49E+09  | 26292000 | 1.79E+09 | 1.68E+08 | 2.08E+08 | 35343000 | 1.31E+08  |           |          |          |
| P35637        | P35637    | RNA-binding protein FUS                                   | FUS       | spj    | P35637 | 10 | 10 | 8  | 5  | 9  | 7  | 10 | 4  | 7  | 10 | 4  | 7  | 10 | 4  | 7    | 10     | 6      | 8     | 0         | 108.64    | 4.006E+09 | 59659000  | 1.24E+09 | 30986000 | 2.95E+09 | 9300000  | 89748000 | 21207000  | 79934000  |          |          |
| P53999        | P53999    | Activated RNA polymerase II transcriptional coact SUB1    | spj       | P53999 | 9      | 9  | 9  | 4  | 7  | 5  | 9  | 4  | 7  | 5  | 9  | 4  | 7  | 5  | 9  | 4    | 7      | 5      | 9     | 0         | 50.916    | 4.001E+09 | 4.93E+08  | 1.54E+09 | 29633000 | 1.94E+09 | 4.18E+08 | 1.81E+08 | 36007000  | 89801000  |          |          |
| P09429;B2     | P09429;B2 | High mobility group protein B1;Putative high mob HMG61;H1 | spj       | P09429 | 12     | 12 | 8  | 4  | 12 | 1  | 10 | 4  | 12 | 1  | 10 | 4  | 12 | 1  | 10 | 4    | 12     | 1      | 10    | 4         | 50.241    | 3.998E+09 | 32878000  | 2.24E+09 | 2073400  | 1.72E+09 | 24146000 | 1.92E+08 | 2.145E+08 | 74329000  |          |          |
| O95782        | O95782    | AP-2 complex subunit alpha-1                              | AP2A1     | spj    | O95782 | 24 | 24 | 19 | 0  | 13 | 11 | 24 | 0  | 13 | 11 | 24 | 0  | 13 | 11 | 24   | 0      | 13     | 11    | 24        | 0         | 128.83    | 3.991E+09 | 0        | 3.5E+08  | 43073000 | 3.6E+09  | 0        | 39448000  | 40419000  | 1.25E+08 |          |
| P26368        | P26368    | Splicing factor UZAF 65 kDa subunit                       | UZAF2     | spj    | P26368 | 11 | 11 | 11 | 1  | 7  | 8  | 10 | 1  | 7  | 8  | 10 | 1  | 7  | 8  | 10   | 1      | 7      | 8     | 10        | 0         | 100.32    | 3.977E+09 | 19071000 | 1.36E+09 | 14492000 | 2.45E+09 | 19762000 | 1.26E+08  | 11050000  | 87724000 |          |
| O00429        | O00429    | Dynamitin-1-like protein                                  | DNM1L     | spj    | O00429 | 26 | 26 | 26 | 0  | 22 | 6  | 26 | 0  | 22 | 6  | 26 | 0  | 22 | 6  | 26   | 0      | 22     | 6     | 26        | 0         | 323.31    | 3.955E+09 | 0        | 1.12E+09 | 7863100  | 2.83E+09 | 0        | 1.06E+08  | 4211400   | 1.1E+08  |          |
| P14866        | P14866    | Heterogeneous nuclear ribonucleoprotein L                 | HNRNPL    | spj    | P14866 | 19 | 19 | 19 | 6  | 16 | 12 | 17 | 6  | 16 | 12 | 17 | 6  | 16 | 12 | 17   | 6      | 16     | 12    | 17        | 0         | 130.37    | 3.926E+09 | 6.42E+08 | 1.05E+09 | 14772000 | 2.09E+09 | 3.23E+08 | 1.15E+08  | 33985000  | 1.38E+08 |          |
| P55010        | P55010    | Eukaryotic translation initiation factor 5                | EIF5      | spj    | P55010 | 17 | 17 | 17 | 4  | 14 | 10 | 17 | 4  | 14 | 10 | 17 | 4  | 14 | 10 | 17   | 4      | 14     | 10    | 17        | 0         | 65.68     | 3.912E+09 | 6909100  | 9.27E+08 | 30617000 | 2.95E+09 | 9256000  | 92861000  | 2237700   | 1.05E+08 |          |
| Q09028        | Q09028    | Histone-binding protein RBBP4                             | RBBP4     | spj    | Q09028 | 14 | 14 | 14 | 7  | 13 | 8  | 13 | 4  | 13 | 8  | 13 | 4  | 13 | 8  | 13   | 4      | 13     | 8     | 13        | 0         | 67.615    | 3.909E+09 | 40421000 | 1.82E+09 | 62031000 | 1.99E+09 | 78640000 | 1.17E+08  | 39413000  | 88829000 |          |
| Q07960        | Q07960    | Rho GTPase-activating protein 1                           | ARHGAP1   | spj    | Q07960 | 16 | 16 | 16 | 2  | 14 | 4  | 16 | 2  | 14 | 4  | 16 | 2  | 14 | 4  | 16   | 2      | 14     | 4     | 16        | 0         | 95.367    | 3.902E+09 | 20352000 | 4.03E+08 | 8919800  | 3.47E+09 | 12766000 | 33454000  | 7065600   | 1.51E+08 |          |
| P52292        | P52292    | Importin subunit alpha-1                                  | KPNA2     | spj    | P52292 | 16 | 16 | 16 | 2  | 15 | 13 | 16 | 2  | 15 | 13 | 16 | 2  | 15 | 13 | 16   | 2      | 15     | 13    | 16        | 0         | 135.52    | 3.897E+09 | 5302800  | 1.23E+09 | 98697000 | 2.56E+09 | 8719000  | 1.09E+08  | 59104000  | 1.08E+08 |          |
| O9Y266        | O9Y266    | Nuclear migration protein nudC                            | NUDC      | spj    | O9Y266 | 22 | 22 | 22 | 0  | 21 | 8  | 20 | 0  | 21 | 8  | 20 | 0  | 21 | 8  | 20   | 0      | 21     | 8     | 20        | 0         | 171.153   | 3.886E+09 | 0        | 1.06E+09 | 28354000 | 2.79E+09 | 0        | 1.01E+08  | 16558000  | 1.09E+08 |          |
| P42766        | P42766    | 60S ribosomal protein L35                                 | RPL35     | spj    | P42766 | 5  | 5  | 5  | 3  | 4  | 5  | 3  | 4  | 5  | 3  | 4  | 5  | 3  | 4  | 5    | 3      | 4      | 5     | 3         | 0         | 26.832    | 3.87E+09  | 1.44E+08 | 1.02E+09 | 46486000 | 2.24E+09 | 1.47E+08 | 80135000  | 31780000  | 6784000  |          |
| P62851        | P62851    | 40S ribosomal protein S25                                 | RPS25     | spj    | P62851 | 5  | 5  | 5  | 2  | 5  | 5  | 5  | 2  | 5  | 5  | 5  | 2  | 5  | 5  | 5    | 2      | 5      | 5     | 5         | 0         | 12.849    | 3.848E+09 | 73506000 | 1.53E+09 | 26550000 | 1.98E+09 | 6142000  | 1.3E+08   | 18438000  | 84663000 |          |
| P46379        | P46379    | Large proline-rich protein BAG6                           | BAG6      | spj    | P46379 | 31 | 31 | 31 | 14 | 12 | 30 | 18 | 14 | 12 | 30 | 18 | 14 | 12 | 30 | 18   | 14     | 12     | 30    | 18        | 0         | 166.69    | 3.846E+09 | 6.09E+08 | 1.41E+08 | 2.71E+09 | 6.26E+08 | 9.35E+08 | 12526000  | 1.331E+09 | 23767000 |          |
| P51991        | P51991    | Heterogeneous nuclear ribonucleoprotein A3                | HNRNPA3   | spj    | P51991 | 16 | 16 | 16 | 6  | 12 | 12 | 14 | 6  | 12 | 12 | 14 | 6  | 12 | 12 | 14   | 6      | 12     | 12    | 14        | 0         | 85.677    | 3.838E+09 | 1.01E+09 | 8.12E+08 | 24710000 | 1.75E+09 | 7.48E+08 | 99143000  | 39116000  | 91149000 |          |
| Q8NB59        | Q8NB59    | Thioredoxin domain-containing protein 5                   | TXNDC5    | spj    | Q8NB59 | 13 | 13 | 13 | 1  | 13 | 4  | 12 | 1  | 13 | 4  | 12 | 1  | 13 | 4  | 12   | 1      | 13     | 4     | 12        | 0         | 72.491    | 3.814E+09 | 1188500  | 2.28E+09 | 1091000  | 1.52E+09 | 1756500  | 2.32E+08  | 3779700   | 34807000 |          |
| Q3NR30        | Q3NR30    | Nucleolar RNA helicase 2                                  | DDX21     | spj    | Q3NR30 | 28 | 28 | 28 | 20 | 24 | 26 | 3  | 20 | 24 | 26 | 3  | 20 | 24 | 26 | 3    | 20     | 24     | 26    | 3         | 0         | 145.3     | 3.812E+09 | 49272000 | 3.36E+08 | 35773000 | 2.87E+09 | 76382000 | 34389000  | 24190000  | 87603000 |          |
| P62266        | P62266    | 40S ribosomal protein S23                                 | RPS23     | spj    | P62266 | 8  | 8  | 8  | 3  | 8  | 8  | 7  | 3  | 8  | 8  | 7  | 3  | 8  | 8  | 7    | 3      | 8      | 8     | 7         | 0         | 30.109    | 3.811E+09 | 1.23E+09 | 7.95E+08 | 19092000 | 1.59E+09 | 1.15E+09 | 80911000  | 17813000  | 83493000 |          |
| P09382        | P09382    | Galactin-1                                                | LGALS1    | spj    | P09382 | 8  | 8  | 8  | 3  | 8  | 8  | 7  | 3  | 8  | 8  | 7  | 3  | 8  | 8  | 7    | 3      | 8      | 8     | 7         | 0         | 40.622    | 3.803E+09 | 0        | 18589000 | 14256000 | 3.64E+09 | 0        | 2808500   | 65946000  | 1.78E+08 |          |
| Q13501        | Q13501    | Sesquiosome-1                                             | SQSTM1    | spj    | Q13501 | 15 | 15 | 15 | 1  | 7  | 11 | 15 | 1  | 7  | 11 | 15 | 1  | 7  | 11 | 15   | 1      | 7      | 11    | 15        | 0         | 257.63    | 3.799E+09 | 1366400  | 93151000 | 20945000 | 3.5E+09  | 2591400  | 5875700   | 15921000  | 1.26E+08 |          |
| P47895        | P47895    | Aldehyde dehydrogenase family 1 member A3                 | ALDH1A3   | spj    | P47895 | 22 | 22 | 20 | 0  | 3  | 5  | 22 | 0  | 3  | 5  | 22 | 0  | 3  | 5  | 22   | 0      | 3      | 5     | 22        | 0         | 105.89    | 3.767E+09 | 0        | 44561000 | 835000   | 3.71E+09 | 0        | 2507500   | 2994900   | 1.55E+08 |          |
| P61289        | P61289    | Proteasome activator complex subunit 3                    | PSME3     | spj    | P61289 | 15 | 15 | 15 | 0  | 12 | 4  | 14 | 0  | 12 | 4  | 14 | 0  | 12 | 4  | 14   | 0      | 12     | 4     | 14        | 0         | 66.257    | 3.762E+09 | 0        | 1.18E+09 | 1490000  | 2.56E+09 | 0        | 1.12E+08  | 14564000  | 91651000 |          |
| P60660        | P60660    | Myosin light polypeptide 6                                | MYL6      | spj    | P60660 | 7  | 7  | 5  | 4  | 6  | 7  | 5  | 4  | 6  | 7  | 5  | 4  | 6  | 7  | 5    | 4      | 6      | 7     | 5         | 0         | 21.131    | 3.752E+09 | 3.04E+08 | 2.18E+08 | 53289000 | 3.18E+09 | 3.13E+08 | 18837000  | 37198000  | 1.2E+08  |          |
| P84098        | P84098    | 60S ribosomal protein L19                                 | RPL19     | spj    | P84098 | 9  | 9  | 9  | 2  | 7  | 8  | 7  | 2  | 7  | 8  | 7  | 2  | 7  | 8  | 7    | 2      | 7      | 8     | 7         | 0         | 36.2      | 3.746E+09 | 1540800  | 9.48E+08 | 63697000 | 2.16E+09 | 4822700  | 1.03E+08  | 33877000  | 1.14E+08 |          |
| Q15029        | Q15029    | 116 kDa US small nuclear ribonucleoprotein com            | FTUO2     | spj    | Q15029 | 27 | 26 | 26 | 5  | 26 | 24 | 26 | 5  | 25 | 23 | 25 | 23 | 25 | 23 | 25   | 23     | 25     | 23    | 25        | 0         | 192.97    | 3.743E+09 | 11245000 | 1.38E+09 | 14767000 | 2.16E+09 | 1.62E+09 | 16388000  | 1.1E+08   | 12463000 | 71567000 |
| P37108        | P37108    | Signal recognition particle 14 kDa protein                | SRP14     | spj    | P37108 | 9  | 9  | 9  | 3  | 7  | 8  | 7  | 3  | 7  | 8  | 7  | 3  | 7  | 8  | 7    | 3      | 7      | 8     | 7         | 0         | 50.7      | 3.741E+09 | 2.83E+08 | 1.67E+09 | 13982000 | 1.65E+09 | 1.43E+08 | 1.22E+08  | 15704000  | 71842000 |          |
| P12111        | P12111    | Collagen alpha-3(VI) chain                                | COL6A3    | spj    | P12111 | 51 | 51 | 51 | 2  | 9  | 51 | 1  | 2  | 9  | 51 | 1  | 2  | 9  | 51 | 1    | 2      | 9      | 51    | 1         | 0         | 51.1      | 3.735E+09 | 20530000 | 3247200  | 14613000 | 3.74E+09 | 4749200  | 560780    | 3147700   | 1.74E+08 |          |
| P61221        | P61221    | ATP-binding cassette sub-family E member 1                | ABCE1     | spj    | P61221 | 14 | 14 | 14 | 6  | 14 | 4  | 14 | 6  | 14 | 4  | 14 | 6  | 14 | 4  | 14   | 6      | 14     | 4     | 14        | 0         | 178.9     | 3.726E+09 | 51489000 | 1.12E+09 | 10822000 | 2.50E+09 | 50334000 | 1.1E+08   | 1123000   | 81925000 |          |
| Q58F84        | Q58F84    | Putative heat shock protein HSP 90-beta 2                 | HSP90AB2  | spj    | Q58F84 | 9  | 1  | 1  | 5  | 9  | 6  | 9  | 1  | 1  | 1  | 1  | 1  | 1  | 1  | 1    | 1      | 1      | 1     | 1         | 0         | 16.794    | 3.706E+09 | 2.68E+08 | 6.65E+08 | 15155000 | 2.76E+09 | 2.08E+08 | 1.12E+08  | 19535000  | 1.11E+08 |          |
| Q9H984        | Q9H984    | Sideroflexin-1                                            | SFXN1     | spj    | Q9H984 | 13 | 13 | 13 | 2  | 13 | 10 | 11 | 2  | 13 | 10 | 11 | 2  | 13 | 10 | 11   | 2      | 13     | 10    | 11        | 0         | 55.619    | 3.699E+09 | 33529000 | 1.79E+09 | 7184000  | 1.81E+09 | 46894000 | 1.44E+08  | 4297900   | 66043000 |          |
| P49720        | P49720    | Proteasome subunit beta type-3                            | PSMB3     | spj    | P49720 | 8  | 8  | 8  | 6  | 5  | 8  | 0  | 6  | 5  | 8  | 0  | 6  | 5  | 8  | 0    | 6      | 5      | 8     | 0         | 0         | 41.807    | 3.679E+09 | 0        | 1.43E+09 | 43092000 | 2.21E+09 | 0        | 1.04E+08  | 3789000   | 968000   |          |
| Q9NYU2        | Q9NYU2    | UDP-glucose:glycoprotein glucosyltransferase 1            | UGGT1     | spj    | Q9NYU2 | 31 | 31 | 31 | 0  | 29 | 6  | 29 | 0  | 29 | 6  | 29 | 0  | 29 | 6  | 29   | 0      | 29     | 6     | 29        | 0         | 193.12    | 3.67E+09  | 0        | 6.91E+08 | 20797000 | 2.96E+09 | 0        | 74047000  | 12699000  | 1.1E+08  |          |
| P00367;P4     | P00367;P4 | Glutamate dehydrogenase 1, mitochondrial;Gluta            | GLUD1;GLI | spj    | P00367 | 24 | 24 | 24 | 0  | 24 | 9  | 0  | 24 | 9  | 0  | 24 | 9  | 0  | 24 | 9    | 0      | 24     | 9     | 0         | 0         | 50.2      | 3.619E+09 | 0        | 1.41E+09 | 1577000  | 2.24E+09 | 0        | 1.04E+08  | 16202000  | 80387000 |          |
| Q16891        | Q16891    | MICOS complex subunit MIC60                               | IMMT      | spj    | Q16891 | 30 | 30 | 30 | 8  | 29 | 19 | 25 | 8  | 29 | 19 | 25 | 8  | 29 | 19 | 25   | 8      | 29     | 19    | 25        | 0         | 189.72    | 3.645E+09 | 28434000 | 2.3E+09  | 64413000 | 1.25E+09 | 29749000 | 1.67E+08  | 59903000  | 63585000 |          |
| Q15046        | Q15046    | Lysine-tRNA ligase                                        | KARS      | spj    | Q15046 | 31 | 31 | 31 | 5  | 27 | 20 | 28 | 5  | 27 | 20 | 28 | 5  | 27 | 20 | 28   | 5      | 27     | 20    | 28        | 0         | 141.9     | 3.634E+09 | 32280000 | 1.13E+09 | 16270000 | 2.3E+09  | 47183000 | 92873000  | 90252000  | 93268000 |          |
| Q15393        | Q15393    | Splicing factor 3B subunit 3                              | SF3B3     | spj    | Q15393 | 29 | 29 | 29 | 7  | 26 | 18 | 28 | 7  | 26 | 18 | 28 | 7  | 26 | 18 | 28   | 7      | 26     | 18    | 28        | 0         | 244.62    | 3.625E+09 | 2.11E+08 | 1.39E+09 | 2792000  | 1.95E+09 |          |           |           |          |          |

|           |           |                                                                |           |           |    |    |    |    |    |    |    |    |     |    |    |        |        |        |           |           |           |           |           |           |           |           |           |          |           |          |          |          |
|-----------|-----------|----------------------------------------------------------------|-----------|-----------|----|----|----|----|----|----|----|----|-----|----|----|--------|--------|--------|-----------|-----------|-----------|-----------|-----------|-----------|-----------|-----------|-----------|----------|-----------|----------|----------|----------|
| P36957    | P36957    | Dihydrolypolylysine-residue succinyltransferase cc DLST        | sp P36957 | 9         | 9  | 9  | 7  | 8  | 6  | 9  | 7  | 8  | 6   | 9  | 21 | 48.755 | 0      | 101.57 | 3.121E+09 | 2.73E+08  | 9.53E+08  | 98238000  | 1.8E+09   | 1.59E+08  | 1.12E+08  | 123520000 | 1.03E+08  |          |           |          |          |          |
| P51665    | P51665    | 26S proteasome non-ATPase regulatory subunit 7 PSM07           | sp P51665 | 10        | 10 | 2  | 10 | 2  | 10 | 9  | 10 | 2  | 10  | 9  | 10 | 41.7   | 37.025 | 0      | 114.88    | 3.118E+09 | 123920    | 7.9E+08   | 42629000  | 2.4E+09   | 1455100   | 1.27E+08  | 16914000  | 38523000 |           |          |          |          |
| P42677    | P42677    | 40S ribosomal protein S27                                      | RP527     | 5         | 5  | 5  | 5  | 5  | 5  | 2  | 5  | 5  | 2   | 3  | 2  | 41.7   | 37.025 | 0      | 23.588    | 3.118E+09 | 40578000  | 9.75E+08  | 11895000  | 1.98E+09  | 35732000  | 58951000  | 126420000 | 52159000 |           |          |          |          |
| P18085    | P18085    | ADP-ribosylation factor 4                                      | ARF4      | 8         | 4  | 4  | 1  | 8  | 7  | 8  | 1  | 4  | 4   | 4  | 4  | 52.8   | 20.511 | 0      | 20.153    | 3.103E+09 | 1799900   | 5.94E+08  | 39233000  | 2.47E+09  | 4069800   | 27474000  | 24828000  | 1.26E+08 |           |          |          |          |
| Q04917    | Q04917    | 14-3-3 protein eta                                             | YWHAH     | 16        | 12 | 4  | 16 | 9  | 15 | 3  | 12 | 6  | 11  | 3  | 12 | 61     | 28.218 | 0      | 211.48    | 3.102E+09 | 4164100   | 9.84E+08  | 16677000  | 2.1E+09   | 4072500   | 77454000  | 8161200   | 95833000 |           |          |          |          |
| P28072    | P28072    | Proteasome subunit beta type-6                                 | PSMB6     | sp P28072 | 7  | 7  | 1  | 6  | 4  | 6  | 1  | 6  | 4   | 6  | 1  | 6      | 51.5   | 25.357 | 0         | 105.39    | 3.1E+09   | 1572500   | 8.73E+08  | 27964000  | 2.2E+09   | 2398100   | 70876000  | 29090000 | 83271000  |          |          |          |
| Q9Y617    | Q9Y617    | Phosphoserine aminotransferase                                 | PSAT1     | sp Q9Y617 | 15 | 15 | 15 | 15 | 0  | 11 | 15 | 0  | 11  | 15 | 0  | 11     | 50.8   | 40.422 | 0         | 53.519    | 3.099E+09 | 2118400   | 2.16E+09  | 0         | 9.37E+08  | 3253000   | 2.1E+08   | 0        | 15743000  |          |          |          |
| Q14008    | Q14008    | Cytoskeleton-associated protein 5                              | CKAP5     | sp Q14008 | 39 | 39 | 3  | 32 | 15 | 38 | 3  | 32 | 15  | 38 | 3  | 32     | 26.3   | 22.549 | 0         | 164.35    | 3.098E+09 | 1787300   | 8.22E+08  | 42118000  | 2.3E+09   | 9313700   | 92735000  | 3748000  | 54190000  |          |          |          |
| P14550    | P14550    | Alcohol dehydrogenase [NAD(P)+]                                | AKR1A1    | sp P14550 | 9  | 9  | 0  | 9  | 1  | 8  | 0  | 9  | 1   | 8  | 0  | 9      | 28.9   | 36.573 | 0         | 29.111    | 3.088E+09 | 0         | 5.11E+08  | 2873100   | 2.57E+09  | 0         | 78485000  | 2310900  | 72039000  |          |          |          |
| Q13283    | Q13283    | Ras GTPase-activating protein-binding protein 1                | G3BP1     | sp Q13283 | 16 | 16 | 14 | 12 | 14 | 2  | 14 | 12 | 14  | 1  | 13 | 11     | 45.3   | 52.164 | 0         | 135.49    | 3.086E+09 | 91340     | 7.64E+08  | 37218000  | 1.55E+09  | 2117700   | 15686000  | 25466600 | 1.01E+08  |          |          |          |
| Q16181    | Q16181    | Septin-7                                                       | SEP7      | sp Q16181 | 14 | 14 | 2  | 14 | 9  | 14 | 2  | 14 | 9   | 14 | 2  | 14     | 37.3   | 50.679 | 0         | 100.23    | 3.075E+09 | 669910    | 9.71E+08  | 49248000  | 2.05E+09  | 891200    | 8384000   | 12735000 | 87223000  |          |          |          |
| Q15631    | Q15631    | Translin                                                       | TSN       | sp Q15631 | 13 | 13 | 2  | 13 | 3  | 10 | 2  | 13 | 3   | 10 | 2  | 13     | 59.6   | 26.183 | 0         | 62.476    | 3.06E+09  | 2008900   | 1.14E+09  | 4558600   | 1.92E+09  | 8457100   | 1.08E+08  | 1398400  | 73965000  |          |          |          |
| P35613    | P35613    | Basigin                                                        | BSG       | sp P35613 | 12 | 12 | 12 | 3  | 12 | 4  | 9  | 3  | 12  | 4  | 9  | 42.6   | 42.2   | 0      | 74.9      | 3.045E+09 | 5455300   | 1.83E+09  | 7995500   | 1.2E+09   | 2899500   | 1.62E+08  | 3762600   | 47243000 |           |          |          |          |
| Q9NSD9    | Q9NSD9    | Phenylalanine-tRNA ligase beta subunit                         | FARS5B    | sp Q9NSD9 | 20 | 20 | 1  | 19 | 10 | 19 | 1  | 19 | 10  | 19 | 1  | 19     | 40.9   | 66.115 | 0         | 99.12     | 3.042E+09 | 2180600   | 9.8E+08   | 33501000  | 2.03E+09  | 3962900   | 88437000  | 2392000  | 78070000  |          |          |          |
| Q6PKG0    | Q6PKG0    | La-related protein 1                                           | LARP1     | sp Q6PKG0 | 33 | 33 | 4  | 27 | 27 | 28 | 4  | 27 | 27  | 28 | 4  | 27     | 27     | 28     | 0         | 165.91    | 3.036E+09 | 1406000   | 1E+09     | 24233000  | 1.78E+09  | 16529000  | 82832000  | 16970000 | 69255000  |          |          |          |
| P06396    | P06396    | Gelsolin                                                       | GSN       | sp P06396 | 22 | 22 | 11 | 3  | 14 | 12 | 22 | 3  | 14  | 12 | 22 | 1      | 5      | 65.96  | 0         | 189.54    | 3.036E+09 | 8035600   | 1.97E+08  | 58257000  | 2.77E+09  | 1544000   | 2038800   | 3810000  | 1.05E+08  |          |          |          |
| P55036    | P55036    | 26S proteasome non-ATPase regulatory subunit 4 PSM04           | sp P55036 | 14        | 14 | 10 | 14 | 10 | 14 | 10 | 14 | 10 | 14  | 10 | 14 | 10     | 6      | 39.5   | 40.736    | 0         | 150.84    | 3.036E+09 | 0         | 1.28E+09  | 64473000  | 1.69E+09  | 0         | 1.09E+08 | 38969000  | 67064000 |          |          |
| P54819    | P54819    | Adenylate kinase 2, mitochondrial;Adenylate kina AK2           | sp P54819 | 13        | 13 | 13 | 1  | 13 | 1  | 13 | 1  | 13 | 1   | 13 | 1  | 13     | 67.4   | 26.477 | 0         | 75.054    | 3.032E+09 | 2562300   | 2.17E+08  | 1283300   | 1.85E+08  | 1362400   | 1.96E+08  | 861280   | 15897000  |          |          |          |
| Q6I850    | Q6I850    | Twinfilin-2                                                    | TWF2      | sp Q6I850 | 15 | 14 | 1  | 10 | 5  | 15 | 1  | 9  | 4   | 14 | 1  | 9      | 4      | 14     | 52.1      | 39.548    | 0         | 110.23    | 3.029E+09 | 612390    | 2.54E+08  | 9017500   | 2.77E+09  | 0        | 60444000  | 3954200  | 1.02E+08 |          |
| P28074    | P28074    | Proteasome subunit beta type-5                                 | PSMB5     | sp P28074 | 10 | 10 | 1  | 9  | 9  | 10 | 1  | 9  | 9   | 10 | 1  | 9      | 4      | 10     | 44.9      | 28.48     | 0         | 93.283    | 3.029E+09 | 774650    | 1.11E+09  | 56756000  | 1.86E+09  | 4717100  | 66970000  | 19809000 | 1.28E+08 |          |
| P61224;A6 | P61224;A6 | Ras-related protein Rap-1b;Ras-related protein R. RAP1B        | sp P61224 | 9         | 9  | 3  | 1  | 9  | 2  | 9  | 1  | 9  | 2   | 9  | 0  | 3      | 64.1   | 20.825 | 0         | 100.33    | 3.023E+09 | 424410    | 4.4E+08   | 18045000  | 2.56E+09  | 7987600   | 40907000  | 24271000 | 76971000  |          |          |          |
| P40121    | P40121    | Macrophage-capping protein                                     | CAPG      | sp P40121 | 9  | 9  | 0  | 1  | 9  | 0  | 1  | 9  | 0   | 1  | 9  | 0      | 1      | 9      | 35.6      | 38.498    | 0         | 105.2     | 3.009E+09 | 0         | 2850000   | 4767100   | 3E+09     | 0        | 191180    | 531310   | 1.08E+08 |          |
| P60866    | P60866    | 40S ribosomal protein S20                                      | RP520     | sp P60866 | 5  | 5  | 5  | 4  | 4  | 3  | 4  | 4  | 3   | 4  | 4  | 3      | 4      | 31.1   | 13.373    | 0         | 20.319    | 3.004E+09 | 81641000  | 1.1E+09   | 155710000 | 1.67E+09  | 66935000  | 9901800  | 123560000 | 61911000 |          |          |
| P68400;Q6 | P68400;Q6 | Casein kinase II subunit alpha;Casein kinase II sub. CSNK2A1;C | sp P68400 | 12        | 12 | 12 | 0  | 12 | 10 | 11 | 0  | 12 | 10  | 11 | 0  | 12     | 10     | 11     | 44.5      | 45.143    | 0         | 97.278    | 2.97E+09  | 0         | 1.22E+09  | 1554000   | 1.58E+09  | 0        | 87427000  | 13843000 | 58832000 |          |
| Q07666;Q0 | Q07666    | KH domain-containing, RNA-binding, signal trans. KHDRBS1       | sp Q07666 | 10        | 10 | 1  | 9  | 8  | 8  | 1  | 9  | 8  | 8   | 1  | 9  | 8      | 28.7   | 48.227 | 0         | 51.612    | 2.969E+09 | 8354000   | 1.59E+09  | 106350000 | 1.26E+09  | 1118500   | 1.6E+08   | 50496000 | 49440000  |          |          |          |
| Q60841    | Q60841    | Eukaryotic translation initiation factor 5B                    | EIF5B     | sp Q60841 | 31 | 31 | 2  | 29 | 16 | 27 | 2  | 29 | 16  | 27 | 2  | 29     | 16     | 27     | 33.8      | 138.83    | 0         | 211.23    | 2.965E+09 | 4039700   | 1.15E+09  | 50328000  | 1.76E+09  | 2489500  | 92744000  | 2378200  | 91877000 |          |
| Q9JUZ1    | Q9JUZ1    | Stomatol-like protein 2, mitochondrial                         | STOML2    | sp Q9JUZ1 | 13 | 13 | 2  | 13 | 6  | 13 | 2  | 13 | 6   | 13 | 2  | 13     | 6      | 13     | 48.9      | 38.534    | 0         | 132.68    | 2.951E+09 | 5005500   | 1.18E+09  | 13074000  | 1.76E+09  | 4662200  | 8800000   | 1137000  | 69807000 |          |
| P18077    | P18077    | 60S ribosomal protein L55a                                     | RLP55A    | sp P18077 | 11 | 11 | 11 | 3  | 10 | 9  | 11 | 3  | 10  | 9  | 11 | 3      | 10     | 9      | 11        | 57.3      | 12.538    | 0         | 25.746    | 2.948E+09 | 19375000  | 6.99E+08  | 35592000  | 1.87E+09 | 28610000  | 5282200  | 23020000 | 77498000 |
| Q93009    | Q93009    | Ubiquitin carboxyl-terminal hydrolase 7                        | USP7      | sp Q93009 | 26 | 26 | 26 | 1  | 24 | 13 | 25 | 1  | 24  | 13 | 25 | 1      | 24     | 13     | 25        | 34.1      | 128.3     | 0         | 145.89    | 2.946E+09 | 24240000  | 8.41E+08  | 44251000  | 2.04E+09 | 3442000   | 70468000 | 41655000 | 65376000 |
| P00441    | P00441    | Superoxide dismutase [Cu-Zn]                                   | SOD1      | sp P00441 | 8  | 8  | 8  | 0  | 8  | 2  | 6  | 0  | 8   | 2  | 6  | 0      | 8      | 2      | 6         | 76.6      | 15.956    | 0         | 57.496    | 2.919E+09 | 0         | 2.53E+09  | 3043800   | 3.89E+08 | 0         | 2.1E+08  | 300410   | 24781000 |
| P50213    | P50213    | Isocitrate dehydrogenase [NAD] subunit alpha, m                | IDH3A     | sp P50213 | 10 | 10 | 10 | 9  | 4  | 7  | 0  | 9  | 4   | 7  | 0  | 9      | 4      | 7      | 0         | 81.39     | 2.907E+09 | 0         | 1.31E+09  | 4230900   | 1.6E+09   | 0         | 1.09E+08  | 1323000  | 61888000  |          |          |          |
| Q14444    | Q14444    | Caprin-1                                                       | CAPRIN1   | sp Q14444 | 12 | 12 | 12 | 6  | 11 | 12 | 6  | 11 | 12  | 6  | 11 | 12     | 12     | 6      | 11        | 12        | 26        | 78.365    | 0         | 69.484    | 2.902E+09 | 60742000  | 6.47E+08  | 35766000 | 1.84E+09  | 6584900  | 40025000 | 52044000 |
| Q99829    | Q99829    | Copine-1                                                       | CPNE1     | sp Q99829 | 13 | 13 | 13 | 3  | 8  | 6  | 13 | 3  | 8   | 6  | 13 | 3      | 8      | 6      | 13        | 37.6      | 59.508    | 0         | 148.64    | 2.896E+09 | 20870000  | 1.42E+08  | 26972000  | 2.71E+09 | 54544000  | 10425000 | 90139000 |          |
| P28066    | P28066    | Proteasome subunit alpha type-5                                | PSMA5     | sp P28066 | 10 | 10 | 10 | 1  | 8  | 3  | 9  | 1  | 8   | 3  | 9  | 1      | 8      | 3      | 9         | 41.9      | 26.411    | 0         | 49.509    | 2.894E+09 | 6430700   | 1.03E+09  | 2381000   | 1.84E+09 | 10213000  | 7799100  | 22491000 | 77516000 |
| P30048    | P30048    | Thioredoxin-dependent peroxidoreductase, mito                  | PRDX3     | sp P30048 | 10 | 10 | 1  | 10 | 3  | 9  | 1  | 10 | 3   | 9  | 1  | 10     | 3      | 9      | 43.4      | 27.692    | 0         | 45.065    | 2.892E+09 | 6509100   | 1.65E+09  | 3784800   | 1.23E+09  | 4040100  | 1.07E+08  | 2087700  | 50175000 |          |
| P09936    | P09936    | Ubiquitin carboxyl-terminal hydrolase isozyme L1               | UCHL1     | sp P09936 | 9  | 9  | 9  | 0  | 8  | 0  | 8  | 0  | 8   | 0  | 8  | 0      | 8      | 51.6   | 24.824    | 0         | 36.922    | 2.887E+09 | 0         | 5.12E+08  | 0         | 2.38E+09  | 0         | 6478000  | 0         | 78013000 |          |          |
| P30084    | P30084    | Enoyl-CoA hydratase, mitochondrial                             | ECHS1     | sp P30084 | 12 | 12 | 1  | 11 | 3  | 9  | 1  | 11 | 3   | 9  | 1  | 11     | 3      | 9      | 46.9      | 31.387    | 0         | 88.93     | 2.874E+09 | 1320500   | 1.38E+09  | 25443000  | 1.47E+09  | 0        | 1.23E+08  | 31431000 | 44666000 |          |
| Q6DD88    | Q6DD88    | Atlastin-3                                                     | ATL3      | sp Q6DD88 | 18 | 18 | 18 | 0  | 8  | 5  | 18 | 0  | 8   | 5  | 18 | 0      | 8      | 5      | 18        | 42.7      | 60.541    | 0         | 152.61    | 2.858E+09 | 0         | 1.68E+08  | 6691200   | 2.68E+09 | 0         | 16821000 | 696400   | 1.05E+08 |
| P20810    | P20810    | Calpastatin                                                    | CAST      | sp P20810 | 20 | 20 | 20 | 12 | 1  | 20 | 0  | 12 | 1   | 20 | 0  | 12     | 1      | 20     | 46        | 76.572    | 0         | 149.05    | 2.858E+09 | 0         | 2.1E+08   | 2666900   | 2.65E+09  | 0        | 2449000   | 3102600  | 1.01E+08 |          |
| P62987;P0 | P62987;P0 | Ubiquitin-60S ribosomal protein L40;Ubiquitin;60               | UBA52;UB  | sp P62987 | 5  | 5  | 1  | 5  | 5  | 5  | 5  | 5  | 5   | 5  | 5  | 5      | 1      | 1      | 44.5      | 14.728    | 0         | 46.801    | 2.857E+09 | 4301800   | 9.39E+08  | 34902000  | 1.57E+09  | 5370600  | 80409000  | 24601000 | 51858000 |          |
| P06737    | P06737    | Glycogen phosphorylase, liver form                             | PGYL      | sp P06737 | 35 | 35 | 29 | 0  | 32 | 2  | 30 | 0  | 32  | 2  | 30 | 0      | 26     | 0      | 24        | 51.2      | 97.417    | 0         | 162.54    | 2.834E+09 | 0         | 1.04E+09  | 1901700   | 1.79E+09 | 0         | 1.80E+08 | 1233300  | 58210000 |
| Q75874    | Q75874    | Isocitrate dehydrogenase [NADP] cytoplasmic                    | IDH1      | sp Q75874 | 16 | 15 | 0  | 13 | 9  | 16 | 0  | 12 | 8   | 15 | 0  | 12     | 8      | 15     | 45.9      | 46.659    | 0         | 70.447    | 2.827E+09 | 0         | 5.51E+08  | 1387700   | 2.26E+09  | 0        | 5557200   | 15099000 | 80235000 |          |
| P59988    | P59988    | Actin-related protein 2/3 complex subunit 4                    | ARPC4     | sp P59988 | 8  | 8  | 8  | 7  | 5  | 7  | 0  | 7  | 5</ |    |    |        |        |        |           |           |           |           |           |           |           |           |           |          |           |          |          |          |



|        |        |                                                      |          |          |    |    |    |    |    |    |    |    |    |    |    |    |    |    |    |        |           |         |        |           |           |           |           |          |          |          |           |          |          |         |
|--------|--------|------------------------------------------------------|----------|----------|----|----|----|----|----|----|----|----|----|----|----|----|----|----|----|--------|-----------|---------|--------|-----------|-----------|-----------|-----------|----------|----------|----------|-----------|----------|----------|---------|
| Q06323 | Q06323 | Proteasome activator complex subunit 1               | PSME1    | Q106323  | 11 | 11 | 11 | 0  | 10 | 5  | 11 | 0  | 10 | 5  | 11 | 0  | 10 | 5  | 11 | 44.6   | 28.723    | 0       | 41.01  | 2.531E+09 | 0         | 6.28E+08  | 12174000  | 1.89E+09 | 0        | 56956000 | 12448000  | 68300000 |          |         |
| Q53H12 | Q53H12 | Acylglycerol kinase, mitochondrial                   | AGK      | Q1053H12 | 10 | 10 | 10 | 3  | 9  | 7  | 9  | 3  | 9  | 7  | 9  | 3  | 9  | 7  | 9  | 36     | 47.137    | 0       | 77.365 | 2.526E+09 | 44164000  | 1.07E+09  | 53886000  | 1.36E+09 | 64770000 | 85894000 | 27013000  | 52675000 |          |         |
| Q14617 | Q14617 | AP-3 complex subunit delta-1                         | AP3D1    | Q1014617 | 24 | 24 | 24 | 1  | 20 | 12 | 22 | 1  | 20 | 12 | 22 | 1  | 20 | 12 | 22 | 27.5   | 130.16    | 0       | 175.82 | 2.524E+09 | 697500    | 5.1E+08   | 35095000  | 1.98E+09 | 0        | 43760000 | 39562000  | 66638000 |          |         |
| P11766 | P11766 | Alcohol dehydrogenase class-3                        | ADH5     | Q111766  | 8  | 8  | 8  | 0  | 8  | 1  | 7  | 0  | 8  | 1  | 7  | 0  | 8  | 1  | 7  | 22.7   | 39.724    | 0       | 35.578 | 2.522E+09 | 0         | 6.16E+08  | 743660    | 1.91E+09 | 0        | 16509000 | 1554500   | 1.15E+08 |          |         |
| Q15942 | Q15942 | Zyxin                                                | ZYX      | Q1015942 | 13 | 13 | 13 | 0  | 7  | 4  | 13 | 0  | 7  | 4  | 13 | 0  | 7  | 4  | 13 | 39.5   | 61.277    | 0       | 213.15 | 2.511E+09 | 0         | 1.53E+08  | 756440    | 2.35E+09 | 0        | 17340000 | 7207200   | 90675000 |          |         |
| P62136 | P62136 | Serine/threonine-protein phosphatase PP1-alpha       | PPP1CA   | Q1062136 | 12 | 12 | 12 | 4  | 12 | 7  | 12 | 4  | 12 | 7  | 12 | 4  | 12 | 7  | 12 | 6      | 46.4      | 37.512  | 0      | 66.508    | 2.508E+09 | 28390000  | 6.71E+08  | 47273000 | 1.76E+09 | 24666000 | 71433000  | 36073000 | 55280000 |         |
| Q92614 | Q92614 | Unconventional myosin-XVIIIa                         | MYO18A   | Q1092614 | 35 | 35 | 35 | 3  | 6  | 33 | 29 | 3  | 6  | 33 | 29 | 3  | 6  | 33 | 29 | 23.8   | 233.11    | 0       | 149.42 | 2.503E+09 | 1.34E+08  | 90304000  | 238590000 | 2.04E+09 | 65399000 | 6086500  | 230440000 | 81774000 |          |         |
| P62280 | P62280 | 40S ribosomal protein S11                            | RPS11    | Q1062280 | 10 | 10 | 10 | 5  | 10 | 9  | 9  | 5  | 10 | 9  | 9  | 5  | 10 | 9  | 9  | 55.7   | 18.431    | 0       | 31.868 | 2.503E+09 | 98376000  | 9.86E+08  | 21020000  | 1.22E+09 | 87724000 | 10510000 | 47483000  |          |          |         |
| Q9Y6N5 | Q9Y6N5 | Sulfide:quinone oxidoreductase, mitochondrial        | SQRDL    | Q109Y6N5 | 15 | 15 | 15 | 0  | 14 | 13 | 0  | 0  | 14 | 13 | 0  | 0  | 14 | 13 | 0  | 44.9   | 49.96     | 0       | 185.46 | 2.501E+09 | 0         | 0         | 14966000  | 2.35E+09 | 0        | 10198000 | 95307000  | 0        | 15098000 | 9307000 |
| Q16851 | Q16851 | UTP--gamma-U-3-phosphate uridylyltransferase         | UGP2     | Q1016851 | 15 | 15 | 15 | 0  | 12 | 4  | 15 | 0  | 12 | 4  | 15 | 0  | 12 | 4  | 15 | 42.7   | 56.94     | 0       | 68.48  | 2.45E+09  | 0         | 2.14E+08  | 447450    | 2.85E+09 | 0        | 47260000 | 81652700  | 88438000 |          |         |
| Q90404 | Q90404 | Ras-related protein Rab-1B                           | RAB1B    | Q1090404 | 10 | 4  | 4  | 2  | 10 | 7  | 10 | 1  | 4  | 3  | 4  | 1  | 4  | 3  | 4  | 66.2   | 32.171    | 0       | 70.059 | 2.498E+09 | 990600    | 6.61E+08  | 6399600   | 1.83E+09 | 997580   | 53671000 | 4202000   | 67867000 |          |         |
| O75489 | O75489 | NADH dehydrogenase [ubiquinone] iron-sulfur pr       | NDUFS3   | Q1075489 | 12 | 12 | 12 | 0  | 11 | 6  | 12 | 0  | 11 | 6  | 12 | 0  | 11 | 6  | 12 | 54.9   | 30.241    | 0       | 86.314 | 2.482E+09 | 0         | 1.1E+09   | 3177000   | 1.35E+09 | 0        | 89541000 | 30260000  | 54211000 |          |         |
| Q0UM54 | Q0UM54 | Pre-mRNA-processing factor 19                        | PRPF19   | Q109UM54 | 12 | 12 | 12 | 3  | 11 | 8  | 11 | 3  | 11 | 8  | 11 | 3  | 11 | 8  | 11 | 34.5   | 55.18     | 0       | 80.065 | 2.471E+09 | 28904000  | 6.68E+08  | 11223000  | 1.66E+09 | 56162000 | 48183000 | 6055000   | 45522000 |          |         |
| O00303 | O00303 | Eukaryotic translation initiation factor 3 subunit F | EIF3F    | Q100303  | 13 | 13 | 13 | 9  | 11 | 7  | 12 | 9  | 11 | 7  | 12 | 9  | 11 | 7  | 12 | 9      | 53.8      | 37.563  | 0      | 97.538    | 2.47E+09  | 5.83E+08  | 8.82E+08  | 22041000 | 1.85E+09 | 5.42E+08 | 50530000  | 27191000 | 74883000 |         |
| Q04446 | Q04446 | 1,4-alpha-glucan-branching enzyme                    | GBE1     | Q104444  | 18 | 18 | 18 | 1  | 8  | 0  | 18 | 1  | 8  | 0  | 18 | 1  | 8  | 0  | 18 | 42.7   | 80.473    | 0       | 119.55 | 2.463E+09 | 60161000  | 94956000  | 0         | 2.31E+09 | 42854000 | 24130000 | 0         | 96440000 |          |         |
| P55809 | P55809 | Succinyl-CoA:3-ketoacid Coenzyme A transferase       | OXC1T    | Q1055809 | 14 | 14 | 14 | 1  | 12 | 2  | 14 | 1  | 12 | 2  | 14 | 1  | 12 | 2  | 14 | 40.4   | 56.157    | 0       | 195.94 | 2.458E+09 | 1149000   | 8.69E+08  | 8209400   | 1.58E+09 | 38506000 | 50078000 | 9471900   | 82578000 |          |         |
| P20340 | P20340 | Ras-related protein Rab-6A                           | RAB6A    | Q1020340 | 8  | 8  | 8  | 5  | 1  | 8  | 1  | 6  | 1  | 8  | 1  | 6  | 0  | 8  | 1  | 6      | 39.9      | 23.593  | 0      | 59.813    | 2.454E+09 | 2015500   | 7.71E+08  | 14355000 | 1.67E+09 | 473880   | 97345000  | 474400   | 28949000 |         |
| Q13148 | Q13148 | TAR DNA-binding protein 43                           | TARDBP   | Q1013148 | 9  | 9  | 9  | 9  | 6  | 9  | 9  | 9  | 6  | 9  | 9  | 9  | 6  | 9  | 9  | 5.8    | 44.739    | 0       | 59.83  | 2.45E+09  | 4143200   | 1.09E+09  | 4000000   | 23031000 | 1.33E+09 | 4078000  | 10545000  | 11742000 | 48287000 |         |
| P61011 | P61011 | Signal recognition particle 54 kDa protein           | SRP54    | Q1061011 | 16 | 16 | 16 | 0  | 14 | 3  | 15 | 0  | 14 | 3  | 15 | 0  | 14 | 3  | 15 | 37.5   | 55.704    | 0       | 97.382 | 2.449E+09 | 0         | 8.11E+08  | 3402900   | 1.64E+09 | 0        | 74621000 | 1616400   | 64696000 |          |         |
| P28331 | P28331 | NADH-ubiquinone oxidoreductase 75 kDa subunit        | NDUFS1   | Q1028331 | 23 | 23 | 23 | 3  | 22 | 11 | 19 | 3  | 22 | 11 | 19 | 3  | 22 | 11 | 19 | 42.1   | 79.700    | 0       | 121.5  | 2.448E+09 | 2346200   | 1.19E+09  | 3711000   | 1.22E+09 | 2386500  | 99290000 | 14409000  | 64319000 |          |         |
| O94979 | O94979 | Protein transport protein Sec31A                     | SEC31A   | Q1094979 | 24 | 24 | 24 | 0  | 18 | 1  | 24 | 0  | 18 | 1  | 24 | 0  | 18 | 1  | 24 | 26     | 133.01    | 0       | 113.89 | 2.436E+09 | 0         | 3.61E+08  | 155840    | 2.07E+09 | 0        | 38041000 | 0         | 76441000 |          |         |
| P36542 | P36542 | ATP synthase subunit gamma, mitochondrial            | ATP5C1   | Q1036542 | 11 | 11 | 11 | 2  | 11 | 7  | 10 | 2  | 11 | 7  | 10 | 2  | 11 | 7  | 10 | 2      | 45.3      | 32.996  | 0      | 49.224    | 2.433E+09 | 4527900   | 1.01E+09  | 44750000 | 1.38E+09 | 6250900  | 95367000  | 21559000 | 56847000 |         |
| P54578 | P54578 | Ubiquitin carboxyl-terminal hydrolase 14             | USP14    | Q1054578 | 18 | 18 | 18 | 0  | 16 | 4  | 17 | 0  | 16 | 4  | 17 | 0  | 16 | 4  | 17 | 49.6   | 56.068    | 0       | 115.4  | 2.43E+09  | 0         | 5.63E+08  | 5703400   | 1.86E+09 | 0        | 49190000 | 5281500   | 75425000 |          |         |
| P12236 | P12236 | ADP/ATP translocase 3;ADP/ATP translocase 3, N       | SLC25A6  | Q1012236 | 12 | 12 | 12 | 10 | 9  | 2  | 5  | 3  | 2  | 1  | 3  | 2  | 1  | 3  | 2  | 38.9   | 32.866    | 0       | 21.16  | 2.428E+09 | 1.77E+08  | 1.12E+09  | 5180000   | 9.72E+08 | 1.72E+08 | 21772000 | 35126000  | 45355000 |          |         |
| O60701 | O60701 | UDP-glucose 6-dehydrogenase                          | UGDH     | Q1060701 | 17 | 17 | 17 | 1  | 8  | 5  | 17 | 1  | 8  | 5  | 17 | 1  | 8  | 5  | 17 | 45.3   | 55.023    | 0       | 94.431 | 2.427E+09 | 1811600   | 87114000  | 5543100   | 2.33E+09 | 2151400  | 9062300  | 3452500   | 99479000 |          |         |
| P30043 | P30043 | Flavin reductase [NADPH]                             | BLVRB    | Q1030043 | 8  | 8  | 8  | 6  | 1  | 8  | 0  | 6  | 1  | 8  | 0  | 6  | 1  | 8  | 0  | 48.1   | 22.119    | 0       | 41.491 | 2.424E+09 | 0         | 2.33E+08  | 812420    | 1.95E+09 | 0        | 23197000 | 63740     | 87307000 |          |         |
| P21281 | P21281 | V-type proton ATPase subunit B, brain isoform        | ATP6V1B2 | Q1021281 | 16 | 16 | 16 | 0  | 13 | 4  | 15 | 0  | 13 | 4  | 15 | 0  | 13 | 4  | 15 | 52.1   | 56.5      | 0       | 145.87 | 2.418E+09 | 0         | 5.81E+08  | 494910    | 1.83E+09 | 0        | 36686000 | 57663000  | 4522300  | 76613000 |         |
| O9B7T0 | O9B7T0 | Acidic leucine-rich nuclear phosphoprotein 32 fan    | ANP32F   | Q109B7T0 | 4  | 4  | 4  | 0  | 4  | 0  | 4  | 0  | 4  | 0  | 4  | 0  | 4  | 0  | 4  | 12.3   | 30.692    | 0       | 39.165 | 2.414E+09 | 0         | 0.89E+08  | 0         | 1.52E+09 | 0        | 79472000 | 0         | 62048000 |          |         |
| P06753 | P06753 | Tropomyosin alpha-3 chain                            | TPM3     | Q1006753 | 16 | 7  | 5  | 14 | 13 | 16 | 4  | 6  | 6  | 7  | 4  | 6  | 6  | 7  | 4  | 43.2   | 62.95     | 0       | 23.57  | 2.414E+09 | 13351000  | 9.61E+08  | 10026000  | 1.34E+09 | 13486000 | 47473000 | 74893000  | 63111000 |          |         |
| P11216 | P11216 | Glycogen phosphorylase, brain form                   | PYGB     | Q1011216 | 29 | 24 | 22 | 2  | 25 | 5  | 25 | 2  | 20 | 3  | 20 | 2  | 19 | 3  | 18 | 41.2   | 96.695    | 0       | 107.95 | 2.41E+09  | 10699000  | 4.55E+08  | 5663100   | 1.94E+09 | 65966000 | 4830000  | 1848700   | 77738000 |          |         |
| O94905 | O94905 | Erlin-2                                              | ERLN2    | Q1094905 | 12 | 12 | 12 | 11 | 12 | 11 | 12 | 2  | 10 | 11 | 12 | 2  | 10 | 9  | 10 | 38.6   | 37.839    | 0       | 125.43 | 2.405E+09 | 9855300   | 7.95E+08  | 10532000  | 1.5E+09  | 26746000 | 78875000 | 16748000  | 43622000 |          |         |
| P56134 | P56134 | ATP synthase subunit f, mitochondrial                | ATP5F2   | Q1056134 | 3  | 3  | 3  | 3  | 3  | 2  | 1  | 3  | 3  | 2  | 1  | 3  | 3  | 2  | 1  | 39.4   | 10.129    | 0       | 17.508 | 2.404E+09 | 94141000  | 1.06E+09  | 44466000  | 1.21E+09 | 1.16E+08 | 86469000 | 26185000  | 38984000 |          |         |
| P49207 | P49207 | 60S ribosomal protein L34                            | RPL34    | Q1049207 | 7  | 7  | 7  | 7  | 6  | 1  | 7  | 6  | 1  | 7  | 6  | 1  | 7  | 6  | 1  | 15.002 | 2.397E+09 | 5774200 | 15.002 | 2.397E+09 | 735E+08   | 357320000 | 1.35E+09  | 7234900  | 63127000 | 23731000 | 54327000  |          |          |         |
| P38117 | P38117 | Electron transfer flavoprotein subunit beta          | ETFb     | Q1038117 | 14 | 14 | 14 | 0  | 13 | 4  | 13 | 0  | 13 | 4  | 13 | 0  | 13 | 4  | 13 | 45.9   | 27.843    | 0       | 35.344 | 2.395E+09 | 0         | 1.19E+09  | 3568900   | 1.2E+09  | 0        | 1.07E+08 | 530440    | 44869000 |          |         |
| Q02218 | Q02218 | 2-oxoglutarate dehydrogenase, mitochondrial          | OGDH     | Q1002218 | 30 | 30 | 30 | 6  | 20 | 12 | 30 | 6  | 20 | 12 | 30 | 6  | 20 | 12 | 30 | 40.4   | 115.93    | 0       | 145.49 | 2.393E+09 | 43406000  | 3.36E+08  | 2338000   | 1.99E+09 | 42378000 | 10967000 | 31659000  | 63432000 |          |         |
| Q7L576 | Q7L576 | Cytoplasmic FMRI-1-interacting protein 1             | CYFIP1   | Q107L576 | 25 | 25 | 25 | 4  | 2  | 18 | 3  | 23 | 2  | 18 | 3  | 23 | 2  | 18 | 3  | 12.5   | 145.18    | 0       | 106.44 | 2.39E+09  | 887840    | 3.06E+08  | 382800    | 2.08E+09 | 1147900  | 22687000 | 1863600   | 9063000  |          |         |
| P01834 | P01834 | Ig kappa chain C region                              | IGKC     | Q101834  | 4  | 4  | 4  | 1  | 2  | 0  | 3  | 1  | 2  | 0  | 3  | 1  | 2  | 0  | 3  | 65.4   | 11.765    | 0       | 20.001 | 2.388E+09 | 2.35E+09  | 2341500   | 4036000   | 0        | 2.31E+09 | 596050   | 18613000  | 0        |          |         |
| Q13409 | Q13409 | Cytoplasmic dynein 1 intermediate chain 2            | DYNC12   | Q1013409 | 16 | 16 | 16 | 2  | 6  | 10 | 16 | 2  | 6  | 10 | 16 | 2  | 6  | 10 | 16 | 2      | 51.1      | 71.456  | 0      | 220.68    | 2.388E+09 | 4813000   | 74837000  | 68457000 | 2.24E+09 | 11795000 | 8391500   | 46488000 | 82864000 |         |
| Q8WV16 | Q8WV16 | Sec1 family domain-containing protein 2              | SCFD1    | Q108WV16 | 16 | 16 | 16 | 1  | 13 | 2  | 15 | 1  | 13 | 2  | 15 | 1  | 13 | 2  | 15 | 39.7   | 73.279    | 0       | 239.93 | 2.376E+09 | 1192200   | 9.69E+08  | 1744800   | 1.38E+09 | 2968700  | 1.18E+08 | 11132000  | 30089000 |          |         |
| Q8N163 | Q8N163 | Cycl B and apoptosis regulator protein 2             | CCAR2    | Q108N163 | 24 | 24 | 24 | 4  | 18 | 13 | 21 | 4  | 18 | 13 | 21 | 4  | 18 | 13 | 21 | 35.3   | 10.259    | 0       | 74.097 | 2.375E+09 | 34542000  | 6.12E+08  | 93706000  | 1.64E+09 | 36515000 | 45897000 | 78634000  | 56689000 |          |         |
| P61254 | P61254 | 60S ribosomal protein L26                            | RPL26    | Q1061254 | 11 | 11 | 11 |    |    |    |    |    |    |    |    |    |    |    |    |        |           |         |        |           |           |           |           |          |          |          |           |          |          |         |

|        |        |                                                           |         |          |    |    |    |   |    |    |    |    |    |    |    |    |    |    |     |      |        |           |          |           |           |           |          |           |          |          |          |           |           |          |    |   |
|--------|--------|-----------------------------------------------------------|---------|----------|----|----|----|---|----|----|----|----|----|----|----|----|----|----|-----|------|--------|-----------|----------|-----------|-----------|-----------|----------|-----------|----------|----------|----------|-----------|-----------|----------|----|---|
| P49721 | P49721 | Proteasome subunit beta type-2                            | PSMB2   | p P49721 | 7  | 7  | 7  | 2 | 6  | 4  | 7  | 2  | 6  | 4  | 7  | 2  | 6  | 4  | 7   | 45.8 | 22.836 | 0         | 31.565   | 2.154E+09 | 2097300   | 7.19E+08  | 17125000 | 1.42E+09  | 4601000  | 56383000 | 13665000 | 48800000  |           |          |    |   |
| Q9UKX9 | Q9UKX9 | ADP-sugar pyrophosphatase                                 | NDUT5   | p Q9UKX9 | 10 | 10 | 10 | 0 | 9  | 4  | 8  | 0  | 9  | 4  | 8  | 0  | 9  | 4  | 8   | 0    | 51.6   | 24.327    | 0        | 45.767    | 2.154E+09 | 0         | 8.75E+08 | 5277400   | 1.27E+09 | 0        | 7566300  | 6891700   | 5050000   |          |    |   |
| Q96C2X | Q96C2X | BTB/POZ domain-containing protein KCTD12                  | KCTD12  | p Q96C2X | 14 | 14 | 14 | 0 | 9  | 14 | 12 | 6  | 9  | 14 | 12 | 6  | 9  | 14 | 12  | 6    | 9      | 51.4      | 35.7     | 0         | 104.59    | 2.153E+09 | 2.19E+08 | 1.83E+08  | 68823000 | 1.06E+09 | 3.68E+08 | 10425000  | 33944000  | 24162000 |    |   |
| Q14847 | Q14847 | LIM and SH3 domain protein                                | LASP1   | p Q14847 | 14 | 14 | 14 | 1 | 12 | 9  | 14 | 1  | 12 | 9  | 14 | 1  | 12 | 9  | 14  | 1    | 55.6   | 29.717    | 0        | 51.321    | 2.142E+09 | 135960    | 2.04E+08 | 21606000  | 1.92E+09 | 401630   | 13183000 | 5546500   | 87805000  |          |    |   |
| Q6P5R6 | Q6P5R6 | 60S ribosomal protein L22-like 1                          | RPL22L1 | p Q6P5R6 | 4  | 4  | 4  | 2 | 3  | 4  | 3  | 2  | 3  | 4  | 3  | 2  | 3  | 4  | 3   | 2    | 51.6   | 14.606    | 0        | 61.879    | 2.142E+09 | 23988000  | 2.23E+08 | 21411000  | 1.68E+09 | 51105000 | 35681000 | 13393000  | 36455000  |          |    |   |
| P62879 | P62879 | Guanine nucleotide-binding protein G(I)/G(S)/G(T)         | GNB2    | p P62879 | 9  | 9  | 1  | 1 | 6  | 6  | 9  | 1  | 6  | 6  | 9  | 0  | 0  | 0  | 1   | 31.2 | 37.331 | 0         | 123.33   | 2.134E+09 | 35069000  | 2.86E+08  | 30518000 | 1.78E+09  | 34743000 | 27573000 | 23895000 | 67853000  |           |          |    |   |
| Q14108 | Q14108 | Lysosome membrane protein 2                               | SCARB2  | p Q14108 | 10 | 10 | 10 | 0 | 7  | 3  | 9  | 0  | 7  | 3  | 9  | 0  | 7  | 3  | 9   | 0    | 86.075 | 2.129E+09 | 0        | 1.6E+08   | 0         | 1.6E+08   | 0        | 1.97E+09  | 0        | 1871000  | 1258500  | 2270900   | 54151000  |          |    |   |
| P35268 | P35268 | 60S ribosomal protein L22                                 | RPL22   | p P35268 | 5  | 5  | 5  | 2 | 5  | 4  | 4  | 2  | 5  | 4  | 4  | 2  | 5  | 4  | 4   | 2    | 52.3   | 14.787    | 0        | 42.754    | 2.128E+09 | 75609000  | 9.47E+08 | 376820000 | 7.28E+08 | 60233000 | 82859000 | 24089000  | 58276000  |          |    |   |
| O75822 | O75822 | Eukaryotic translation initiation factor 3 subunit 1      | EIF3S2  | p O75822 | 12 | 12 | 12 | 4 | 12 | 3  | 12 | 4  | 12 | 3  | 12 | 4  | 12 | 3  | 12  | 5    | 53.5   | 29.062    | 0        | 99.622    | 2.127E+09 | 1.71E+08  | 1.74E+08 | 12581000  | 1.22E+09 | 2.42E+08 | 29015000 | 5020300   | 17524000  |          |    |   |
| P20042 | P20042 | Eukaryotic translation initiation factor 2 subunit 2      | EIF2S2  | p P20042 | 15 | 15 | 15 | 5 | 12 | 11 | 14 | 5  | 12 | 11 | 14 | 5  | 12 | 11 | 14  | 5    | 12     | 47.4      | 38.388   | 0         | 109.06    | 2.126E+09 | 1.31E+08 | 7.32E+08  | 88482000 | 1.17E+09 | 1.05E+08 | 71022000  | 86520100  | 38218000 |    |   |
| P07858 | P07858 | Cathepsin B/cathepsin B light chain/Cathepsin B           | CTSB    | p P07858 | 8  | 8  | 8  | 0 | 1  | 3  | 8  | 0  | 1  | 3  | 8  | 0  | 1  | 3  | 8   | 0    | 56.805 | 2.124E+09 | 0        | 56.805    | 2.124E+09 | 0         | 5459000  | 43851000  | 2.07E+09 | 0        | 741530   | 21495000  | 80238000  |          |    |   |
| O15355 | O15355 | Protein phosphatase 1G                                    | PPM1G   | p O15355 | 17 | 17 | 17 | 1 | 17 | 6  | 14 | 1  | 17 | 6  | 14 | 1  | 17 | 6  | 14  | 1    | 17     | 48.8      | 59.271   | 0         | 112.53    | 2.117E+09 | 1370900  | 8.03E+08  | 7885500  | 1.21E+09 | 1392000  | 73626000  | 5615600   | 49013000 |    |   |
| A6NUG6 | A6NUG6 | Arginine-fifty homeobox                                   | ARGFX   | p A6NUG6 | 1  | 1  | 1  | 0 | 0  | 0  | 1  | 0  | 0  | 0  | 0  | 0  | 0  | 0  | 0   | 0    | 8.6    | 35.616    | 0.002446 | 2.2173    | 2.113E+09 | 2.11E+09  | 0        | 0         | 0        | 2.11E+09 | 0        | 0         | 0         | 0        |    |   |
| O60488 | O60488 | Long-chain-fatty-acid-CoA ligase 4                        | ACSL4   | p O60488 | 17 | 17 | 16 | 1 | 11 | 6  | 17 | 1  | 11 | 6  | 17 | 1  | 10 | 5  | 16  | 33.8 | 79.187 | 0         | 78.646   | 2.113E+09 | 940870    | 2.01E+08  | 33873000 | 1.82E+09  | 1915600  | 9095100  | 14305000 | 92591000  |           |          |    |   |
| P09622 | P09622 | Dihydrolipoyl dehydrogenase, mitochondrial                | DLD     | p P09622 | 11 | 11 | 11 | 1 | 8  | 3  | 11 | 1  | 8  | 3  | 11 | 1  | 8  | 3  | 11  | 1    | 27.5   | 54.177    | 0        | 40.569    | 2.112E+09 | 695900    | 1.99E+08 | 5871000   | 1.19E+09 | 550480   | 86653000 | 2145700   | 4512000   |          |    |   |
| P06132 | P06132 | Uroporphyrinogen decarboxylase                            | UROD    | p P06132 | 9  | 9  | 9  | 1 | 9  | 0  | 8  | 1  | 9  | 0  | 8  | 1  | 9  | 0  | 8   | 1    | 9      | 45.5      | 40.786   | 0         | 80.297    | 2.109E+09 | 0        | 3.78E+08  | 518300   | 1.73E+09 | 0        | 394940    | 65048000  |          |    |   |
| O00425 | O00425 | Insulin-like growth factor 2 mRNA-binding protein IGF2BP3 | IGF2BP3 | p O00425 | 17 | 15 | 15 | 6 | 12 | 14 | 14 | 10 | 12 | 12 | 14 | 10 | 12 | 12 | 14  | 10   | 35.6   | 63.604    | 0        | 76.337    | 2.101E+09 | 96931000  | 3.96E+08 | 201620000 | 1.41E+09 | 1.3E+08  | 31924000 | 102680000 | 44557000  |          |    |   |
| P61758 | P61758 | Prefoldin subunit 1                                       | VBP1    | p P61758 | 10 | 10 | 10 | 1 | 10 | 1  | 10 | 1  | 10 | 1  | 10 | 1  | 10 | 1  | 10  | 1    | 60.734 | 2.1E+09   | 1.17E+09 | 1.17E+09  | 1.17E+09  | 1.17E+09  | 1.17E+09 | 1.17E+09  | 1.17E+09 | 1.17E+09 | 1.17E+09 | 1.17E+09  | 1.17E+09  | 1.17E+09 |    |   |
| P13798 | P13798 | Acylation-acid-releasing enzyme                           | APEH    | p P13798 | 16 | 16 | 16 | 0 | 14 | 4  | 15 | 0  | 14 | 4  | 15 | 0  | 14 | 4  | 15  | 29.9 | 81.224 | 0         | 76.988   | 2.097E+09 | 0         | 5.5E+08   | 4286000  | 1.54E+09  | 0        | 4262200  | 706900   | 6325000   |           |          |    |   |
| Q15404 | Q15404 | Ras suppressor protein 1                                  | RSU1    | p Q15404 | 12 | 12 | 12 | 1 | 12 | 8  | 11 | 1  | 12 | 8  | 11 | 1  | 12 | 8  | 11  | 1    | 57.4   | 31.54     | 0        | 138.44    | 2.096E+09 | 671200    | 3.79E+08 | 2578000   | 1.69E+09 | 1042400  | 38683000 | 9888800   | 71177000  |          |    |   |
| P11310 | P11310 | Medium-chain specific acyl-CoA dehydrogenase, rACADM      | ACADM   | p P11310 | 17 | 17 | 17 | 1 | 17 | 3  | 15 | 1  | 17 | 3  | 15 | 1  | 17 | 3  | 15  | 1    | 47.5   | 46.588    | 0        | 147.2     | 2.09E+09  | 1004800   | 1.61E+08 | 2846500   | 4.73E+08 | 760000   | 1.35E+08 | 500630    | 18545000  |          |    |   |
| P55735 | P55735 | Protein SEC13                                             | SEC13   | p P55735 | 2  | 2  | 2  | 0 | 2  | 2  | 2  | 0  | 2  | 2  | 2  | 0  | 2  | 2  | 2   | 0    | 46.722 | 0.86E+09  | 0        | 46.722    | 2.086E+09 | 0         | 3.82E+08 | 2265600   | 1.68E+09 | 0        | 3747000  | 13822000  | 59019000  |          |    |   |
| Q15257 | Q15257 | Serine/threonine-protein phosphatase 2A activator         | PPP2R4  | p Q15257 | 11 | 11 | 11 | 0 | 11 | 0  | 11 | 0  | 11 | 0  | 11 | 0  | 11 | 0  | 11  | 0    | 53.4   | 40.667    | 0        | 94.807    | 2.073E+09 | 0         | 7.78E+08 | 0         | 1.39E+09 | 0        | 67842000 | 0         | 5399800   |          |    |   |
| Q9Y510 | Q9Y510 | Transportin-3                                             | TNP03   | p Q9Y510 | 14 | 14 | 14 | 0 | 11 | 5  | 14 | 0  | 11 | 5  | 14 | 0  | 11 | 5  | 14  | 23.8 | 104.2  | 0         | 79.831   | 2.073E+09 | 0         | 2.78E+08  | 9065100  | 1.78E+09  | 0        | 30085000 | 14379000 | 58616000  |           |          |    |   |
| Q15738 | Q15738 | Sterol-4-alpha-carboxylate 3-dehydrogenase, dec           | NSDHL   | p Q15738 | 9  | 9  | 9  | 0 | 8  | 1  | 9  | 0  | 8  | 1  | 9  | 0  | 8  | 1  | 9   | 0    | 95.78  | 2.071E+09 | 0        | 95.78     | 2.071E+09 | 0         | 6.22E+08 | 7805000   | 1.44E+09 | 0        | 40234000 | 1006000   | 62721000  |          |    |   |
| Q96533 | Q96533 | FA5-associated factor 2                                   | FAF2    | p Q96533 | 9  | 9  | 9  | 2 | 8  | 6  | 8  | 2  | 8  | 6  | 8  | 2  | 8  | 6  | 8   | 2    | 8      | 29.9      | 52.623   | 0         | 61.852    | 2.07E+09  | 1959200  | 5.77E+08  | 36119000 | 1.46E+09 | 6969700  | 48643000  | 33899000  | 47715000 |    |   |
| Q43809 | Q43809 | Cleavage and polyadenylation specificity factor subunit 7 | NSD7    | p Q43809 | 11 | 11 | 11 | 1 | 11 | 6  | 9  | 5  | 11 | 6  | 9  | 5  | 11 | 6  | 9   | 5    | 11     | 6         | 9        | 5         | 11        | 6         | 9        | 5         | 11       | 6        | 9        | 5         | 11        | 6        | 9  | 5 |
| P12270 | P12270 | Nucleoprotein TPR                                         | TPR     | p P12270 | 41 | 41 | 41 | 4 | 35 | 20 | 33 | 4  | 35 | 20 | 33 | 4  | 35 | 20 | 33  | 4    | 35     | 20        | 33       | 4         | 35        | 20        | 33       | 4         | 35       | 20       | 33       | 4         | 35        | 20       | 33 | 4 |
| Q53600 | Q53600 | Very-long-chain 3-oxoacyl-CoA reductase                   | MSH2    | p Q53600 | 10 | 10 | 10 | 2 | 10 | 5  | 10 | 2  | 10 | 5  | 10 | 2  | 10 | 5  | 10  | 2    | 10     | 49.7      | 34.324   | 0         | 43.626    | 2.059E+09 | 75122000 | 6.15E+08  | 30099000 | 1.94E+09 | 79658000 | 8704000   | 4465000   | 40996000 |    |   |
| Q12907 | Q12907 | Vesicular integral-membrane protein VIP36                 | LMAN2   | p Q12907 | 10 | 10 | 10 | 0 | 6  | 1  | 9  | 0  | 6  | 1  | 9  | 0  | 6  | 1  | 9   | 0    | 172    | 2.058E+09 | 0        | 172       | 2.058E+09 | 0         | 3.98E+08 | 663720    | 1.66E+09 | 0        | 1236000  | 1211600   | 90189000  |          |    |   |
| O15145 | O15145 | Actin-related protein 2/3 complex subunit 3               | ARPC3   | p O15145 | 8  | 8  | 8  | 1 | 5  | 3  | 8  | 1  | 5  | 3  | 8  | 1  | 5  | 3  | 8   | 1    | 5      | 3         | 8        | 1         | 5         | 3         | 8        | 1         | 5        | 3        | 8        | 1         | 5         | 3        | 8  | 1 |
| P38919 | P38919 | Eukaryotic initiation factor 4A-III;Eukaryotic initiat    | EIF4A3  | p P38919 | 17 | 14 | 14 | 7 | 16 | 9  | 16 | 6  | 14 | 7  | 13 | 6  | 14 | 7  | 13  | 6    | 14     | 38.4      | 46.871   | 0         | 56.96     | 2.052E+09 | 2.18E+08 | 8.43E+08  | 20571000 | 8.7E+08  | 1.69E+08 | 1.01E+08  | 34734000  | 4613000  |    |   |
| Q43390 | Q43390 | Heterogeneous nuclear ribonucleoprotein R                 | HNRNPR  | p Q43390 | 20 | 16 | 16 | 4 | 18 | 15 | 20 | 2  | 14 | 12 | 16 | 4  | 12 | 16 | 4   | 12   | 16     | 114.8     | 2.05E+09 | 1E+08     | 4.31E+08  | 13132000  | 1.39E+09 | 1.19E+08  | 3379900  | 5.86E+08 | 5266000  | 45868000  |           |          |    |   |
| O75828 | O75828 | Carbonyl reductase [NADPH] 3                              | CBR3    | p O75828 | 10 | 8  | 7  | 4 | 6  | 3  | 8  | 2  | 4  | 1  | 6  | 2  | 4  | 1  | 6   | 2    | 4      | 48.7      | 30.85    | 0         | 92.807    | 2.042E+09 | 1.52E+09 | 1.62E+08  | 11879000 | 2.81E+08 | 3.58E+08 | 1.28E+08  | 1.052E+09 | 5988400  |    |   |
| P47914 | P47914 | 60S ribosomal protein L29                                 | RPL29   | p P47914 | 4  | 4  | 4  | 2 | 3  | 2  | 4  | 2  | 3  | 2  | 4  | 2  | 3  | 2  | 4   | 2    | 25.2   | 17.40     | 0        | 9.6257    | 2.036E+09 | 1.88E+08  | 6.91E+08 | 22657000  | 9.3E+08  | 1.12E+08 | 7979000  | 19637000  | 51915000  |          |    |   |
| Q07686 | Q07686 | Beta-hexosaminidase subunit beta;Beta-hexosam             | HEXB    | p Q07686 | 12 | 12 | 12 | 1 | 9  | 6  | 12 | 1  | 9  | 6  | 12 | 1  | 9  | 6  | 12  | 1    | 39.1   | 63.111    | 0        | 90.393    | 2.035E+09 | 6480500   | 4.2E+08  | 34093000  | 1.57E+09 | 9682200  | 2289600  | 2985000   | 68472000  |          |    |   |
| Q9Y211 | Q9Y211 | Exosome complex exonuclease RRP44                         | DIS3    | p Q9Y211 | 20 | 20 | 20 | 1 | 17 | 6  | 19 | 2  | 17 | 6  | 19 | 2  | 17 | 6  | 19  | 31.1 | 109    | 0         | 95.867   | 2.033E+09 | 2788000   | 7.51E+08  | 4853300  | 1.27E+09  | 6057700  | 46915000 | 8053100  | 56458000  |           |          |    |   |
| P13073 | P13073 | Cytochrome c oxidase subunit 4 isoform 1, mitoc           | COX4I1  | p P13073 | 7  | 7  | 7  | 3 | 7  | 2  | 6  | 3  | 7  | 2  | 6  | 3  | 7  | 2  | 6   | 3    | 42.6   | 19.576    | 0        | 16.348    | 2.03E+09  | 22648000  | 1.2E+09  | 1763300   | 8.04E+08 | 15875000 | 1.06E+08 | 388320    | 37753000  |          |    |   |
| Q14739 | Q14739 | Lamin-B receptor                                          | LBR     | p Q14739 | 11 | 11 | 11 | 1 | 11 | 5  | 8  | 1  | 11 | 5  | 8  | 1  | 11 | 5  | 8   | 1    | 11     | 5         | 8        | 1         | 11        | 5         | 8        | 1         | 11       | 5        | 8        | 1         | 11        | 5        | 8  | 1 |
| P31150 | P31150 | Rab GTP dissociation inhibitor alpha                      | GD11    | p P31150 | 20 | 12 | 12 | 1 | 20 | 3  | 19 | 0  | 12 | 0  | 11 | 0  | 12 | 0  | 11  | 0    | 56.8   | 50.582    | 0        | 241.15    | 2.018E+09 | 0         | 7.86E+08 | 0         | 1.23E+09 | 0        | 51720000 | 0         | 54199000  |          |    |   |
| O96019 | O96019 | Actin-like protein 6A                                     | ACTL6A  | p O96019 | 9  | 9  | 9  | 1 | 8  | 6  | 7  | 1  | 8  | 6  | 7  | 1  | 8  | 6  | 7</ |      |        |           |          |           |           |           |          |           |          |          |          |           |           |          |    |   |

|           |         |                                                   |           |           |    |    |    |    |    |    |    |    |    |    |    |    |    |    |    |      |        |           |         |           |           |          |           |          |          |          |           |           |          |
|-----------|---------|---------------------------------------------------|-----------|-----------|----|----|----|----|----|----|----|----|----|----|----|----|----|----|----|------|--------|-----------|---------|-----------|-----------|----------|-----------|----------|----------|----------|-----------|-----------|----------|
| O95347    | O95347  | Structural maintenance of chromosomes beta        | SMC2      | sp O95347 | 28 | 28 | 28 | 3  | 23 | 13 | 25 | 3  | 23 | 13 | 25 | 3  | 23 | 13 | 25 | 29.3 | 135.65 | 0         | 77.632  | 1.8E+09   | 5061000   | 4.21E+08 | 31397000  | 1.34E+09 | 2788600  | 38842000 | 33705000  | 41018000  |          |
| Q12874    | Q12874  | Splicing factor 3A subunit 3                      | SF3A3     | sp Q12874 | 17 | 17 | 17 | 3  | 17 | 6  | 14 | 3  | 17 | 6  | 14 | 3  | 17 | 6  | 14 | 43.1 | 58.848 | 0         | 131.85  | 1.8E+09   | 11939000  | 9.39E+08 | 20626000  | 2.89E+08 | 9109700  | 75421000 | 26270000  | 31846000  |          |
| P31153_Q0 | P31153  | S-adenosylmethionine synthase isoform type-2      | MAT2A     | sp Q12875 | 10 | 10 | 2  | 9  | 7  | 10 | 2  | 9  | 7  | 10 | 2  | 9  | 7  | 10 | 2  | 9    | 40.621 | 1.792E+09 | 3509000 | 3.94E+08  | 17659000  | 1.37E+08 | 8901200   | 45522000 | 10670000 | 41635000 |           |           |          |
| Q9UBQ7    | Q9UBQ7  | Glyoxylate reductase/hydroxypyruvate reductase    | GRHPR     | sp Q9UBQ7 | 8  | 8  | 8  | 0  | 7  | 0  | 8  | 0  | 7  | 0  | 8  | 0  | 7  | 0  | 8  | 37.5 | 35.668 | 0         | 87.018  | 1.783E+09 | 0         | 8.1E+08  | 0         | 0.73E+08 | 0        | 6668900  | 0         | 47470000  |          |
| Q9NR45    | Q9NR45  | Sialic acid synthase                              | NANS      | sp Q9NR45 | 11 | 11 | 11 | 0  | 9  | 1  | 8  | 0  | 9  | 1  | 8  | 0  | 9  | 1  | 8  | 44   | 40.307 | 0         | 69.3    | 1.781E+09 | 0         | 1.13E+09 | 1402500   | 6.54E+08 | 0        | 1E+08    | 1199100   | 24062000  |          |
| O75153    | O75153  | Clustered mitochondria protein homolog            | CLUH      | sp O75153 | 20 | 20 | 20 | 1  | 16 | 0  | 18 | 1  | 16 | 0  | 18 | 1  | 16 | 0  | 18 | 20.1 | 146.67 | 0         | 50.268  | 1.781E+09 | 1.09E+09  | 1.9E+08  | 0         | 5.04E+08 | 9.91E+08 | 1.01E+08 | 0         | 31142000  |          |
| Q9UQ35    | Q9UQ35  | Serine/arginine repetitive matrix protein 2       | SRRM2     | sp Q9UQ35 | 25 | 25 | 25 | 16 | 17 | 13 | 12 | 16 | 17 | 13 | 12 | 16 | 17 | 13 | 12 | 14.1 | 299.61 | 0         | 130.63  | 1.778E+09 | 1.09E+09  | 3.6E+08  | 158150000 | 1.69E+08 | 7.18E+08 | 87891000 | 409130000 | 20611000  |          |
| Q02978    | Q02978  | Mitochondrial 2-oxoglutarate/malate carrier port  | SLC25A11  | sp Q02978 | 15 | 15 | 15 | 2  | 14 | 8  | 12 | 2  | 14 | 8  | 12 | 2  | 14 | 8  | 12 | 51.6 | 34.061 | 0         | 69.592  | 1.777E+09 | 23763000  | 6.2E+08  | 48002000  | 1.08E+09 | 23197000 | 48018000 | 381540000 | 44227000  |          |
| O9ULC4A   | O9ULC4A | Malignant T-cell amplified sequence 1             | MCTS1     | sp O9ULC4 | 7  | 7  | 7  | 7  | 7  | 7  | 7  | 7  | 7  | 7  | 7  | 7  | 7  | 7  | 7  | 56.9 | 20.555 | 0         | 36.011  | 1.775E+09 | 0         | 6.77E+08 | 913200    | 1.1E+09  | 0        | 58180000 | 635200    | 44522000  |          |
| Q12E23    | Q12E23  | Putative ATP-dependent RNA helicase DHX30         | DHX30     | sp Q12E23 | 27 | 27 | 27 | 5  | 20 | 22 | 22 | 5  | 20 | 22 | 22 | 5  | 20 | 22 | 22 | 32.4 | 133.94 | 0         | 140.59  | 1.773E+09 | 68276000  | 4.25E+08 | 251880000 | 1.03E+09 | 32788000 | 42852000 | 183810000 | 57805000  |          |
| Q75746    | Q75746  | Calcium-binding mitochondrial carrier protein Avc | SLC25A12  | sp Q75746 | 17 | 17 | 17 | 0  | 15 | 16 | 22 | 0  | 15 | 16 | 22 | 0  | 15 | 16 | 22 | 41.4 | 74.761 | 0         | 119.69  | 1.77E+09  | 0         | 0        | 2.11E+08  | 51609000 | 0        | 15139000 | 53858000  | 42528000  |          |
| Q07955    | Q07955  | Serine/arginine-rich splicing factor 1            | SRSF1     | sp Q07955 | 12 | 12 | 12 | 11 | 11 | 12 | 11 | 12 | 11 | 12 | 11 | 12 | 11 | 12 | 11 | 12   | 44.8   | 27.744    | 0       | 36.802    | 1.768E+09 | 1119300  | 9.13E+08  | 94681000 | 7.59E+08 | 1811400  | 91312000  | 6888000   | 13234000 |
| P23921    | P23921  | Ribonucleoside-diphosphate reductase large sub    | RRM1      | sp P23921 | 20 | 20 | 20 | 1  | 17 | 2  | 20 | 1  | 17 | 2  | 20 | 1  | 17 | 2  | 20 | 34.8 | 90.069 | 0         | 106.51  | 1.755E+09 | 1.32E+08  | 4.36E+08 | 8557000   | 1.1E+09  | 87448000 | 75490000 | 294200    | 51499000  |          |
| Q43837    | Q43837  | Isocitrate dehydrogenase [NAD] subunit beta, mit  | IDH3B     | sp Q43837 | 12 | 12 | 12 | 0  | 8  | 3  | 11 | 0  | 8  | 3  | 11 | 0  | 8  | 3  | 11 | 41   | 42.183 | 0         | 72.276  | 1.75E+09  | 0         | 6.43E+08 | 1806300   | 1.1E+09  | 0        | 49590000 | 688000    | 51082000  |          |
| O94826    | O94826  | Mitochondrial import receptor subunit TOM70       | TOM70A    | sp O94826 | 13 | 13 | 13 | 1  | 12 | 5  | 13 | 1  | 12 | 5  | 13 | 1  | 12 | 5  | 13 | 35.4 | 67.454 | 0         | 97.636  | 1.737E+09 | 893910    | 4.74E+08 | 8797300   | 1.25E+09 | 499640   | 14189000 | 4084900   | 53239000  |          |
| P06493    | P06493  | Cyclin-dependent kinase 1                         | CDK1      | sp P06493 | 13 | 13 | 12 | 1  | 12 | 9  | 8  | 1  | 12 | 9  | 8  | 1  | 12 | 9  | 8  | 1    | 11     | 34.905    | 0       | 64.053    | 1.724E+09 | 45414000 | 1.06E+09  | 34794000 | 5.83E+08 | 49706000 | 84641000  | 260430000 | 25893000 |
| Q96KP4    | Q96KP4  | Cytosolic non-specific dipeptidase                | CNDP2     | sp Q96KP4 | 15 | 15 | 15 | 15 | 14 | 1  | 14 | 0  | 14 | 1  | 14 | 0  | 14 | 1  | 14 | 42.1 | 52.878 | 0         | 71.183  | 1.721E+09 | 0         | 5.62E+08 | 154650    | 1.16E+09 | 0        | 82992000 | 83390     | 13470000  |          |
| P30837    | P30837  | Aldehyde dehydrogenase X, mitochondrial           | ALDH1B1   | sp P30837 | 13 | 12 | 12 | 0  | 13 | 0  | 11 | 0  | 12 | 0  | 11 | 0  | 12 | 0  | 11 | 0    | 36.8   | 57.206    | 0       | 95.626    | 1.716E+09 | 0        | 9.86E+08  | 0        | 7.3E+08  | 0        | 18669000  | 0         | 28050000 |
| P98179    | P98179  | RNA-binding protein 3                             | RBM3      | sp P98179 | 5  | 5  | 5  | 5  | 3  | 5  | 0  | 5  | 3  | 5  | 0  | 5  | 3  | 5  | 0  | 5    | 52.2   | 17.17     | 0       | 124.8     | 1.708E+09 | 0        | 4.8E+08   | 14405000 | 1.21E+09 | 0        | 39658000  | 2121000   | 40021000 |
| P40222    | P40222  | Alpha-taxilin                                     | TXLNA     | sp P40222 | 19 | 19 | 19 | 1  | 18 | 9  | 15 | 1  | 18 | 9  | 15 | 1  | 18 | 9  | 15 | 46.7 | 61.89  | 0         | 96.188  | 1.707E+09 | 808910    | 6.5E+08  | 27277000  | 9.13E+08 | 4578900  | 38401000 | 22810000  | 59372000  |          |
| Q8TCT9    | Q8TCT9  | Minor histocompatibility antigen H13              | HM13      | sp Q8TCT9 | 9  | 8  | 8  | 1  | 7  | 2  | 8  | 1  | 7  | 2  | 8  | 1  | 7  | 2  | 8  | 24.1 | 41.888 | 0         | 118.84  | 1.703E+09 | 394460    | 3.35E+08 | 8647300   | 1.36E+09 | 510620   | 25471000 | 733590    | 5830000   |          |
| Q9Y281    | Q9Y281  | Cofilin-2                                         | CF2       | sp Q9Y281 | 9  | 4  | 4  | 3  | 9  | 9  | 8  | 0  | 4  | 2  | 4  | 0  | 4  | 2  | 4  | 56.6 | 18.736 | 0         | 52.946  | 1.703E+09 | 0         | 5.3E+08  | 133560000 | 1.04E+09 | 0        | 35782000 | 17720200  | 38439000  |          |
| P04632_Q0 | P04632  | Calpain small subunit 1                           | CAPN1     | sp P04632 | 8  | 8  | 8  | 1  | 4  | 2  | 8  | 1  | 4  | 2  | 8  | 1  | 4  | 2  | 8  | 63.4 | 28.315 | 0         | 124.95  | 1.701E+09 | 1371500   | 32141000 | 3135800   | 1.66E+09 | 2665100  | 2345200  | 1164800   | 6860000   |          |
| P27361_P2 | P27361  | Mitogen-activated protein kinase 3                | MAPK3     | sp P27361 | 13 | 13 | 14 | 4  | 12 | 1  | 13 | 4  | 12 | 1  | 13 | 4  | 12 | 1  | 13 | 4    | 43.35  | 13.32     | 0       | 46.359    | 1.699E+09 | 27807000 | 4.37E+08  | 3806000  | 1.23E+09 | 39461000 | 29510000  | 3142600   | 47332000 |
| P60891_P2 | P60891  | Ribose-phosphate pyrophosphokinase 1              | PPPS1     | sp P60891 | 11 | 11 | 5  | 2  | 10 | 4  | 8  | 2  | 10 | 4  | 8  | 2  | 10 | 4  | 8  | 2    | 5      | 2         | 0       | 37.743    | 1.699E+09 | 3253600  | 9.78E+08  | 9494100  | 7.08E+08 | 4022300  | 8982300   | 7437300   | 22591000 |
| P51545    | P51545  | Mesencephalic astrocyte-derived neurotrophic fa   | MANF      | sp P51545 | 9  | 9  | 9  | 9  | 9  | 9  | 9  | 9  | 9  | 9  | 9  | 9  | 9  | 9  | 9  | 41.2 | 20.7   | 0         | 40.179  | 1.698E+09 | 0         | 6.62E+08 | 1262700   | 1.03E+09 | 0        | 74993000 | 995210    | 24962000  |          |
| O75436    | O75436  | Vacuolar protein sorting-associated protein 26A   | VPS26A    | sp O75436 | 12 | 12 | 11 | 0  | 12 | 4  | 12 | 0  | 12 | 4  | 12 | 0  | 12 | 4  | 12 | 47.1 | 38.169 | 0         | 50.962  | 1.694E+09 | 0         | 5.51E+08 | 7996300   | 1.33E+09 | 0        | 28963000 | 7912600   | 54340000  |          |
| P06730_Q6 | P06730  | Eukaryotic translation initiation factor 4E       | EIF4E     | sp P06730 | 8  | 8  | 8  | 2  | 8  | 2  | 8  | 2  | 8  | 2  | 8  | 2  | 8  | 2  | 8  | 41.9 | 25.097 | 0         | 27.952  | 1.683E+09 | 7605000   | 7.41E+08 | 4358000   | 8.91E+08 | 15027000 | 5876000  | 2547500   | 39551000  |          |
| P47985_P0 | P47985  | Cytochrome b-c1 complex subunit Rieske, mitocho   | LQCRCF5.1 | sp P47985 | 7  | 7  | 7  | 7  | 7  | 7  | 7  | 7  | 7  | 7  | 7  | 7  | 7  | 7  | 7  | 30.3 | 29.668 | 0         | 30.813  | 1.667E+09 | 0         | 6.41E+08 | 20299000  | 1.01E+09 | 0        | 5286000  | 1821700   | 40415000  |          |
| Q9H3U1    | Q9H3U1  | Protein unc-45 homolog A                          | UNC45A    | sp Q9H3U1 | 17 | 17 | 17 | 1  | 16 | 14 | 15 | 1  | 16 | 14 | 15 | 1  | 16 | 14 | 15 | 22.4 | 103.08 | 0         | 58.197  | 1.657E+09 | 1408700   | 4.58E+08 | 51555000  | 1.15E+09 | 4908300  | 23187000 | 26885000  | 68570000  |          |
| P30520_Q8 | P30520  | Adenosylsuccinyl synthetase isozyme 2             | ADSS      | sp P30520 | 15 | 15 | 15 | 1  | 12 | 1  | 14 | 1  | 12 | 1  | 14 | 1  | 12 | 1  | 14 | 39   | 50.097 | 0         | 72.18   | 1.655E+09 | 660920    | 5.94E+08 | 899970    | 1.06E+09 | 1062300  | 3387000  | 493580    | 61448000  |          |
| P62910    | P62910  | 60S ribosomal protein L32                         | RPL32     | sp P62910 | 8  | 8  | 8  | 2  | 7  | 3  | 8  | 2  | 7  | 3  | 8  | 2  | 7  | 3  | 8  | 40.7 | 15.89  | 0         | 25.536  | 1.652E+09 | 15403000  | 3.74E+08 | 16899000  | 1.09E+09 | 3208300  | 40824000 | 9236200   | 41262000  |          |
| P56537    | P56537  | Eukaryotic translation initiation factor 6        | EIF6      | sp P56537 | 5  | 5  | 5  | 5  | 1  | 4  | 3  | 5  | 1  | 4  | 3  | 5  | 1  | 4  | 3  | 5    | 36.1   | 26.596    | 0       | 99.492    | 1.649E+09 | 3141800  | 2.35E+08  | 25351000 | 1.39E+09 | 8396900  | 11320000  | 15095000  | 62512000 |
| Q14498_Q1 | Q14498  | RNA-binding protein 39                            | RBM39     | sp Q14498 | 13 | 13 | 13 | 5  | 10 | 12 | 12 | 5  | 10 | 12 | 12 | 5  | 10 | 12 | 12 | 30.6 | 59.379 | 0         | 90.027  | 1.645E+09 | 1.56E+08  | 4.38E+08 | 13410000  | 9.17E+08 | 2.03E+08 | 2608000  | 67516000  | 24348000  |          |
| P68366    | P68366  | Tubulin alpha-4A chain                            | TUBA4A    | sp P68366 | 24 | 24 | 24 | 4  | 6  | 20 | 21 | 23 | 0  | 4  | 3  | 5  | 8  | 3  | 5  | 8.3  | 49.924 | 0         | 31.775  | 1.64E+09  | 0         | 0        | 50742000  | 1.59E+09 | 0        | 0        | 41609000  | 57835000  |          |
| Q14157    | Q14157  | Ubiquitin-associated protein 2-like               | UBAP2L    | sp Q14157 | 18 | 18 | 18 | 0  | 18 | 9  | 17 | 0  | 18 | 9  | 17 | 0  | 18 | 9  | 17 | 0    | 71.53  | 0         | 79.765  | 1.633E+09 | 0         | 6.27E+08 | 30243000  | 9.76E+08 | 0        | 48301000 | 29407000  | 34823000  |          |
| P31040    | P31040  | Succinate dehydrogenase [ubiquinone] flavoprot    | SDHA      | sp P31040 | 14 | 14 | 14 | 0  | 11 | 0  | 11 | 0  | 11 | 0  | 11 | 0  | 11 | 0  | 11 | 33.1 | 12.691 | 0         | 95.742  | 1.631E+09 | 0         | 6.35E+08 | 0         | 0.97E+08 | 0        | 55491000 | 0         | 39863000  |          |
| P51571    | P51571  | Translocin-associated protein subunit delta       | SSR4      | sp P51571 | 5  | 5  | 5  | 5  | 4  | 5  | 0  | 4  | 5  | 0  | 4  | 5  | 0  | 4  | 5  | 36.4 | 18.998 | 0         | 27.661  | 1.63E+09  | 0         | 6.63E+08 | 10605000  | 9.56E+08 | 0        | 45802000 | 16804000  | 42318000  |          |
| O75347    | O75347  | Tubulin-specific chaperone A                      | TBCA      | sp O75347 | 8  | 8  | 8  | 1  | 8  | 0  | 8  | 1  | 8  | 0  | 8  | 1  | 8  | 0  | 8  | 54.6 | 12.855 | 0         | 57.039  | 1.629E+09 | 465230    | 8.23E+08 | 0         | 8.05E+08 | 0        | 67387000 | 0         | 37941000  |          |
| P30419    | P30419  | Glycopeptide N-tetradecanoyltransferase 1         | NMT1      | sp P30419 | 10 | 10 | 10 | 6  | 9  | 0  | 10 | 6  | 9  | 0  | 10 | 6  | 9  | 0  | 10 | 6    | 31.5   | 56.806    | 0       | 107.53    | 1.623E+09 | 0        | 5.91E+08  | 11432000 | 1.02E+09 | 0        | 52774000  | 13814000  | 35154000 |
| Q9HAV4    | Q9HAV4  | Exportin-5                                        | XPO5      | sp Q9HAV4 | 19 | 19 | 19 | 0  | 19 | 1  | 15 | 0  | 19 | 1  | 15 | 0  | 19 | 1  | 15 | 22   | 136.31 | 0         | 77.835  | 1.623E+09 | 0         | 1.08E+09 | 1258800   | 5.39E    |          |          |           |           |          |

|               |        |                                                           |           |           |    |    |    |    |    |    |    |    |    |    |    |    |    |      |        |        |        |           |           |           |           |           |           |          |          |          |           |          |          |  |
|---------------|--------|-----------------------------------------------------------|-----------|-----------|----|----|----|----|----|----|----|----|----|----|----|----|----|------|--------|--------|--------|-----------|-----------|-----------|-----------|-----------|-----------|----------|----------|----------|-----------|----------|----------|--|
| Q14914        | Q14914 | Prostaglandin reductase 1                                 | PTGR1     | sp Q14914 | 6  | 6  | 6  | 0  | 0  | 0  | 6  | 0  | 0  | 0  | 6  | 0  | 0  | 0    | 6      | 29.8   | 35.869 | 0         | 100.52    | 1.48E+09  | 0         | 0         | 0         | 1.48E+09 | 0        | 0        | 0         | 0        | 60872000 |  |
| Q52944        | Q52944 | ATPase family AAA domain-containing protein 3B            | ATAD3B    | sp Q52944 | 24 | 8  | 6  | 3  | 15 | 20 | 23 | 1  | 3  | 8  | 8  | 1  | 2  | 6    | 6      | 38.6   | 72.572 | 0         | 129.07    | 1.48E+09  | 8261900   | 65348000  | 211410000 | 1.19E+09 | 7424200  | 8077200  | 14658000  | 43143000 |          |  |
| Q8N766        | Q8N766 | ER membrane protein complex subunit 1                     | EMC1      | sp Q8N766 | 28 | 21 | 21 | 6  | 3  | 17 | 3  | 21 | 1  | 17 | 3  | 21 | 1  | 17   | 3      | 21     | 29.6   | 111.160   | 0         | 80.763    | 1.478E+09 | 298340    | 3085400   | 3085400  | 1.2E+09  | 394650   | 21264000  | 1711900  | 5060000  |  |
| Q13177;Q13177 | Q13177 | Serine/threonine-protein kinase PAK 2;PAK-2p27;PAK2       | sp Q13177 | 16        | 16 | 13 | 0  | 14 | 1  | 16 | 0  | 14 | 1  | 16 | 0  | 11 | 1  | 13   | 42.6   | 58.042 | 0      | 42.588    | 1.475E+09 | 0         | 3.62E+08  | 1722800   | 1.11E+09  | 0        | 12550000 | 2884300  | 57370000  |          |          |  |
| P54920;Q5     | P54920 | Alpha-soluble NF attachment protein                       | NAPA      | sp P54920 | 10 | 10 | 10 | 0  | 9  | 2  | 10 | 0  | 9  | 2  | 10 | 0  | 9  | 2    | 10     | 39     | 33.22  | 0         | 80.871    | 1.475E+09 | 0         | 2.05E+08  | 2526000   | 1.27E+09 | 0        | 13675000 | 2728900   | 51202000 |          |  |
| P04899        | P04899 | Guanine nucleotide-binding protein G(i) subunit alpha     | GNAI2     | sp P04899 | 9  | 9  | 6  | 0  | 5  | 3  | 9  | 0  | 5  | 3  | 9  | 0  | 4  | 1    | 6      | 34.1   | 40.45  | 0         | 34.98     | 1.473E+09 | 0         | 1.34E+08  | 19845000  | 1.32E+09 | 0        | 9197700  | 17401000  | 52810000 |          |  |
| P08754        | P08754 | Guanine nucleotide-binding protein G(k) subunit alpha     | GNAI3     | sp P08754 | 9  | 5  | 5  | 0  | 3  | 3  | 8  | 0  | 2  | 1  | 5  | 0  | 2  | 1    | 5      | 32.8   | 40.45  | 0         | 59.561    | 1.473E+09 | 0         | 4.1630000 | 4268800   | 1.43E+09 | 0        | 8996600  | 5671100   | 49975000 |          |  |
| P15924        | P15924 | Nesoplastin                                               | DSP       | sp P15924 | 56 | 56 | 56 | 7  | 31 | 55 | 12 | 7  | 31 | 55 | 12 | 7  | 31 | 55   | 12     | 22.2   | 331.77 | 0         | 160.05    | 1.471E+09 | 5135400   | 3.78E+08  | 96256000  | 1.25E+08 | 6442500  | 23373000 | 63705000  | 5935100  |          |  |
| O95299        | O95299 | ADPH dehydrogenase [ubiquinone] 1 alpha subunit           | NDUFA10   | sp O95299 | 6  | 6  | 6  | 1  | 6  | 1  | 6  | 1  | 6  | 1  | 6  | 1  | 6  | 1    | 6      | 21.7   | 40.75  | 0         | 66.744    | 1.47E+09  | 1726700   | 6.74E+08  | 2688400   | 7.91E+08 | 8058700  | 47959000 | 4007600   | 35815000 |          |  |
| P13473        | P13473 | Lysosome-associated membrane glycoprotein 2               | LAMP2     | sp P13473 | 3  | 3  | 3  | 0  | 3  | 2  | 3  | 0  | 3  | 2  | 3  | 0  | 3  | 2    | 3      | 7.1    | 44.86  | 0         | 13.816    | 1.466E+09 | 0         | 6.54E+08  | 5398900   | 9.11E+08 | 0        | 45662000 | 40336000  | 30956000 |          |  |
| Q86093        | Q86093 | ATP-dependent RNA helicase DDX42                          | DDX42     | sp Q86093 | 17 | 17 | 17 | 0  | 13 | 8  | 14 | 0  | 13 | 8  | 14 | 0  | 13 | 8    | 14     | 31.8   | 102.97 | 0         | 114.83    | 1.464E+09 | 0         | 4.15E+08  | 14419000  | 1.03E+09 | 0        | 34140000 | 28656000  | 26009000 |          |  |
| Q16401        | Q16401 | 26S proteasome non-ATPase regulatory subunit 5            | PSMD5     | sp Q16401 | 14 | 14 | 14 | 0  | 12 | 14 | 0  | 12 | 14 | 0  | 11 | 2  | 14 | 40.5 | 56.195 | 0      | 178.11 | 1.463E+09 | 0         | 5505000   | 1760500   | 1.46E+09  | 0         | 297150   | 463960   | 60778000 |           |          |          |  |
| Q56V13        | Q56V13 | OCA domain-containing protein 2                           | OCAAD2    | sp Q56V13 | 6  | 6  | 6  | 0  | 1  | 4  | 6  | 0  | 1  | 4  | 6  | 0  | 1  | 4    | 6      | 45.5   | 16.953 | 0         | 18.493    | 1.463E+09 | 0         | 2885900   | 10015000  | 1.45E+09 | 0        | 465560   | 6624500   | 59106000 |          |  |
| Q12792        | Q12792 | Twinfilin-1                                               | TWF1      | sp Q12792 | 15 | 15 | 14 | 1  | 11 | 4  | 15 | 1  | 11 | 4  | 15 | 1  | 10 | 3    | 14     | 61.1   | 40.282 | 0         | 201.69    | 1.458E+09 | 6815500   | 1.96E+08  | 5976700   | 1.26E+09 | 702160   | 17706000 | 2375000   | 52827000 |          |  |
| O75663        | O75663 | TIP41-like protein                                        | TIPRL     | sp O75663 | 10 | 10 | 10 | 1  | 8  | 1  | 9  | 1  | 8  | 1  | 9  | 1  | 8  | 1    | 9      | 56.2   | 31.446 | 0         | 61.223    | 1.456E+09 | 43196000  | 5.04E+08  | 544400    | 9.09E+08 | 22969000 | 74133000 | 3346900   | 74870000 |          |  |
| Q7L014        | Q7L014 | Probable ATP-dependent RNA helicase DDX46                 | DDX46     | sp Q7L014 | 24 | 24 | 24 | 5  | 23 | 7  | 27 | 5  | 23 | 7  | 27 | 5  | 23 | 7    | 27     | 17.7   | 117.36 | 0         | 76.407    | 1.456E+09 | 10879000  | 7.74E+08  | 12919000  | 6.58E+08 | 12962000 | 20370000 | 9817600   | 21075000 |          |  |
| O43491        | O43491 | Band 4.1-like protein 2                                   | EPB41L2   | sp O43491 | 27 | 27 | 26 | 0  | 26 | 15 | 22 | 0  | 26 | 15 | 22 | 0  | 25 | 14   | 22     | 41.9   | 112.59 | 0         | 100.37    | 1.451E+09 | 0         | 6.59E+08  | 43093000  | 7.5E+08  | 0        | 54974000 | 33956000  | 28918000 |          |  |
| P62314        | P62314 | Small nuclear ribonucleoprotein Sm D1                     | SNRPD1    | sp P62314 | 4  | 4  | 4  | 2  | 4  | 2  | 3  | 2  | 4  | 2  | 3  | 2  | 4  | 2    | 3      | 45.4   | 13.281 | 0         | 22.208    | 1.448E+09 | 5494300   | 5.51E+08  | 40060000  | 8.51E+08 | 20200000 | 39957000 | 22645000  | 33193000 |          |  |
| Q14683        | Q14683 | Structural maintenance of chromosomes protein 1           | SMC1A     | sp Q14683 | 37 | 37 | 37 | 5  | 36 | 14 | 22 | 5  | 36 | 14 | 22 | 5  | 36 | 14   | 22     | 33.1   | 143.23 | 0         | 105.05    | 1.446E+09 | 11502000  | 1.05E+09  | 28441000  | 3.52E+08 | 17721000 | 15738000 | 28257000  | 16133000 |          |  |
| Q92544        | Q92544 | Transmembrane 9 superfamily member 4                      | TM9SF4    | sp Q92544 | 7  | 7  | 7  | 0  | 5  | 2  | 7  | 0  | 5  | 2  | 7  | 0  | 5  | 2    | 7      | 13.9   | 74.518 | 0         | 41.086    | 1.445E+09 | 0         | 1.31E+08  | 5232100   | 1.31E+09 | 0        | 13840000 | 6324300   | 48735000 |          |  |
| Q10567        | Q10567 | AP-1 complex subunit beta-1                               | AP1B1     | sp Q10567 | 23 | 12 | 12 | 0  | 17 | 6  | 21 | 0  | 17 | 6  | 21 | 0  | 17 | 6    | 21     | 0      | 10.6   | 104.64    | 0         | 66.959    | 1.445E+09 | 0         | 3.80E+08  | 0        | 1.14E+09 | 0        | 30963000  | 0        | 43011000 |  |
| O9Y383        | O9Y383 | Putative RNA-binding protein Luc7-like 2                  | LUC7L2    | sp O9Y383 | 13 | 13 | 8  | 4  | 11 | 8  | 11 | 4  | 11 | 8  | 11 | 4  | 11 | 8    | 11     | 3      | 29.3   | 46.513    | 0         | 35.848    | 1.445E+09 | 56559000  | 7.61E+08  | 75836000 | 5.52E+08 | 82176000 | 57348000  | 34724000 | 18120000 |  |
| O60716        | O60716 | Catenin delta-1                                           | CTNND1    | sp O60716 | 18 | 18 | 18 | 0  | 15 | 14 | 16 | 0  | 15 | 14 | 16 | 0  | 15 | 14   | 16     | 29.1   | 108.17 | 0         | 112.34    | 1.439E+09 | 0         | 2.35E+08  | 76282000  | 1.13E+09 | 0        | 22516000 | 56517000  | 39243000 |          |  |
| Q5JRX3        | Q5JRX3 | Presequence protease, mitochondrial                       | PITRM1    | sp Q5JRX3 | 21 | 21 | 0  | 17 | 1  | 17 | 0  | 17 | 1  | 17 | 0  | 17 | 1  | 17   | 0      | 17     | 27.7   | 117.41    | 0         | 4.09E+08  | 3603400   | 1.02E+09  | 0         | 24908000 | 5988800  | 94846000 |           |          |          |  |
| Q96I24        | Q96I24 | Far upstream element-binding protein 3                    | FUBP3     | sp Q96I24 | 21 | 18 | 18 | 3  | 10 | 8  | 16 | 2  | 17 | 8  | 14 | 5  | 6  | 11   | 8      | 14     | 56.3   | 61.64     | 0         | 70.211    | 1.418E+09 | 1825200   | 7.31E+08  | 32271000 | 6.53E+08 | 1929300  | 55500000  | 34867000 | 22510000 |  |
| Q13011        | Q13011 | Delta(3,5)-Delta(2,4)-dienyl-CoA isomerase, mitochondrial | ECH1      | sp Q13011 | 12 | 12 | 12 | 3  | 11 | 3  | 11 | 3  | 11 | 3  | 11 | 3  | 11 | 3    | 11     | 53.4   | 35.816 | 0         | 163.19    | 1.417E+09 | 52009000  | 6E+08     | 4789700   | 7.6E+08  | 37507000 | 65466000 | 6588700   | 29825000 |          |  |
| Q14257        | Q14257 | Reticulocalin-2                                           | RCK2      | sp Q14257 | 9  | 9  | 9  | 0  | 9  | 8  | 8  | 0  | 9  | 8  | 8  | 0  | 9  | 8    | 8      | 37.9   | 36.876 | 0         | 127.81    | 1.417E+09 | 0         | 6.26E+08  | 117810000 | 6.73E+08 | 0        | 54820000 | 77664000  | 28554000 |          |  |
| O9Y520        | O9Y520 | Protein PRRCC                                             | PRRC2     | sp O9Y520 | 38 | 38 | 37 | 8  | 25 | 31 | 33 | 8  | 25 | 31 | 33 | 8  | 24 | 30   | 32     | 20.3   | 316.91 | 0         | 112.31    | 1.413E+09 | 58027000  | 2.43E+08  | 37560000  | 7.37E+08 | 54402000 | 41974000 | 241600000 | 30148000 |          |  |
| O95747        | O95747 | Serine/threonine-protein kinase OSR1                      | OSR1      | sp O95747 | 10 | 10 | 9  | 1  | 10 | 0  | 9  | 1  | 10 | 0  | 9  | 1  | 10 | 0    | 9      | 1      | 25     | 58.022    | 0         | 48.264    | 1.413E+09 | 0         | 3.14E+08  | 861740   | 1.1E+09  | 0        | 27865000  | 881250   | 44652000 |  |
| O14929        | O14929 | Histone acetyltransferase type B catalytic subunit        | HAT1      | sp O14929 | 9  | 9  | 9  | 0  | 9  | 0  | 6  | 0  | 9  | 0  | 6  | 0  | 9  | 0    | 6      | 29.4   | 49.512 | 0         | 39.629    | 1.407E+09 | 0         | 5.53E+08  | 0         | 8.55E+08 | 0        | 53550000 | 0         | 30313000 |          |  |
| P10515        | P10515 | Dihydropyridine-residue acetyltransferase com             | DLAT      | sp P10515 | 10 | 10 | 10 | 1  | 10 | 1  | 6  | 1  | 10 | 1  | 6  | 1  | 10 | 1    | 6      | 21     | 68.996 | 0         | 43.179    | 1.405E+09 | 38652000  | 1.16E+09  | 1189200   | 2.08E+08 | 27688000 | 1.16E+08 | 1462300   | 3524600  |          |  |
| P11279        | P11279 | Lysosome-associated membrane glycoprotein 1               | LAMP1     | sp P11279 | 5  | 5  | 5  | 2  | 2  | 2  | 5  | 1  | 2  | 2  | 5  | 1  | 2  | 2    | 5      | 11.8   | 44.862 | 0         | 20.564    | 1.405E+09 | 930550    | 1.04E+08  | 6577000   | 1.29E+09 | 8265600  | 7944400  | 14535000  | 35592000 |          |  |
| O60313        | O60313 | Dynamitin-like 120 kDa protein, mitochondrial;Dyn         | OPA1      | sp O60313 | 20 | 20 | 20 | 1  | 13 | 11 | 19 | 2  | 13 | 11 | 19 | 2  | 13 | 11   | 19     | 25.9   | 111.37 | 0         | 116.96    | 1.399E+09 | 1684700   | 2.15E+08  | 2379000   | 1.16E+09 | 3244200  | 13783000 | 14317000  | 52914000 |          |  |
| P26358        | P26358 | DNA (cytosine-5)-methyltransferase 1                      | DNMT1     | sp P26358 | 23 | 23 | 23 | 0  | 21 | 11 | 23 | 0  | 21 | 11 | 23 | 0  | 21 | 11   | 23     | 16.6   | 183.16 | 0         | 81.291    | 1.396E+09 | 0         | 2.91E+08  | 23305000  | 1.08E+09 | 0        | 25996000 | 23024000  | 36799000 |          |  |
| P31947        | P31947 | 14-3-3 protein sigma                                      | SFN       | sp P31947 | 7  | 3  | 1  | 5  | 6  | 5  | 0  | 1  | 3  | 1  | 0  | 1  | 3  | 1    | 0      | 27.4   | 27.774 | 0         | 7.0699    | 1.395E+09 | 0         | 5.4E+08   | 19809000  | 8.35E+08 | 0        | 52210000 | 5159700   | 77760000 |          |  |
| P60983;O6     | P60983 | Glia maturation factor beta                               | GMFB      | sp P60983 | 6  | 6  | 6  | 0  | 6  | 1  | 6  | 0  | 6  | 1  | 6  | 0  | 6  | 1    | 6      | 53.5   | 16.713 | 0         | 94.477    | 1.394E+09 | 0         | 1.9E+08   | 294860    | 1.2E+09  | 0        | 4857700  | 466020    | 61109000 |          |  |
| O95399        | O95399 | Urotensin-2                                               | UTS2      | sp O95399 | 1  | 1  | 1  | 1  | 1  | 1  | 1  | 1  | 1  | 1  | 1  | 1  | 1  | 1    | 1      | 6.5    | 14.295 | 0.001131  | 2.4452    | 1.392E+09 | 41652000  | 6.06E+08  | 11230000  | 6.11E+08 | 41652000 | 53457000 | 75468000  | 25969000 |          |  |
| Q9UN52        | Q9UN52 | COP9 signalosome complex subunit 3                        | COP53     | sp Q9UN52 | 10 | 10 | 10 | 0  | 10 | 2  | 9  | 0  | 10 | 2  | 9  | 0  | 10 | 2    | 9      | 32.2   | 47.73  | 0         | 46.673    | 1.39E+09  | 0         | 5.5E+08   | 3492600   | 8.36E+08 | 0        | 42666000 | 3948900   | 38563000 |          |  |
| Q13098        | Q13098 | COP9 signalosome complex subunit 1                        | GP51      | sp Q13098 | 9  | 9  | 9  | 0  | 8  | 1  | 9  | 0  | 8  | 1  | 9  | 0  | 8  | 1    | 9      | 25.3   | 55.856 | 0         | 50.295    | 1.389E+09 | 0         | 4.41E+08  | 1703700   | 9.46E+08 | 0        | 40490000 | 1455600   | 36661000 |          |  |
| P49753;O6     | P49753 | Acyl-coenzyme A thioesterase 2, mitochondrial;Ac          | ACOT2;ACI | sp P49753 | 11 | 11 | 11 | 0  | 10 | 0  | 9  | 0  | 10 | 0  | 9  | 0  | 10 | 0    | 9      | 36.4   | 53.218 | 0         | 89.295    | 1.388E+09 | 0         | 4.61E+08  | 0         | 9.27E+08 | 0        | 64500000 | 0         | 33318000 |          |  |
| O15042        | O15042 | U2 snRNP-associated SURP motif-containing prot            | UZSURP    | sp O15042 | 22 | 22 | 22 | 2  | 22 | 17 | 19 | 2  | 22 | 17 | 19 | 2  | 22 | 17   | 19     | 32     | 118.29 | 0         |           |           |           |           |           |          |          |          |           |          |          |  |

|        |        |                                                     |           |           |    |    |    |    |    |    |    |    |    |    |    |      |        |        |        |           |           |           |           |           |          |           |          |          |          |          |          |          |
|--------|--------|-----------------------------------------------------|-----------|-----------|----|----|----|----|----|----|----|----|----|----|----|------|--------|--------|--------|-----------|-----------|-----------|-----------|-----------|----------|-----------|----------|----------|----------|----------|----------|----------|
| P15927 | P15927 | Replication protein A 32 kDa subunit                | RPA2      | sp P15927 | 8  | 8  | 8  | 2  | 8  | 4  | 6  | 2  | 8  | 4  | 6  | 2    | 8      | 4      | 6      | 55.9      | 29.247    | 0         | 38.873    | 1.275E+09 | 18623000 | 6.13E+08  | 15931000 | 6.27E+08 | 20146000 | 52072000 | 13727000 | 23187000 |
| Q9BVK6 | Q9BVK6 | Transmembrane emp24 domain-containing protein TME29 | sp Q9BVK6 |           | 6  | 6  | 5  | 0  | 6  | 2  | 6  | 0  | 6  | 4  | 2  | 5    | 29.4   | 27.277 | 0      | 68.802    | 1.273E+09 | 0         | 4.46E+08  | 5371300   | 8.22E+08 | 0         | 37435000 | 2987900  | 28747000 |          |          |          |
| Q04760 | Q04760 | Lactoylglutathione lyase                            | GLO1      | sp Q04760 | 6  | 6  | 5  | 0  | 5  | 0  | 6  | 0  | 6  | 0  | 0  | 6    | 0      | 4      | 38     | 20.777    | 0         | 1.12E+09  | 0         | 1.48E+08  | 0        | 5.4577000 | 0        | 9542000  |          |          |          |          |
| O60762 | O60762 | Dolichol-phosphate mannosyltransferase subunit      | DPM1      | sp O60762 | 8  | 8  | 8  | 0  | 7  | 7  | 8  | 0  | 7  | 7  | 8  | 8    | 40     | 29.634 | 0      | 30.132    | 1.27E+09  | 0         | 3.56E+08  | 5562000   | 8.58E+08 | 0         | 31524000 | 42493000 | 28914000 |          |          |          |
| Q96HY6 | Q96HY6 | DDRKG domain-containing protein 1                   | DDRGK1    | sp Q96HY6 | 8  | 8  | 8  | 0  | 7  | 8  | 8  | 0  | 7  | 8  | 8  | 8    | 51.9   | 35.61  | 0      | 122.52    | 1.269E+09 | 0         | 4.9E+08   | 5012000   | 7.29E+08 | 0         | 4935800  | 41631000 | 25264000 |          |          |          |
| Q01844 | Q01844 | RNA-binding protein EWS                             | EWSR1     | sp Q01844 | 7  | 7  | 7  | 2  | 7  | 5  | 6  | 2  | 7  | 5  | 6  | 16   | 68.477 | 0      | 70.334 | 1.267E+09 | 2867100   | 5.54E+08  | 36530000  | 6.73E+08  | 4935800  | 45679000  | 23491000 | 28815000 |          |          |          |          |
| Q01420 | Q01420 | U6 snRNA-associated Sm-like protein LSM4            | LSM4      | sp Q01420 | 4  | 4  | 4  | 0  | 4  | 1  | 3  | 0  | 4  | 1  | 3  | 25.9 | 15.35  | 0      | 12.383 | 1.263E+09 | 0         | 6.75E+08  | 2785100   | 8.55E+08  | 0        | 70395000  | 3096200  | 21975000 |          |          |          |          |
| O60610 | O60610 | Protein diaphanous homolog 1                        | DIAPH1    | sp O60610 | 21 | 21 | 21 | 0  | 18 | 3  | 21 | 0  | 18 | 3  | 21 | 19.7 | 141.35 | 0      | 100.15 | 1.262E+09 | 0         | 4.01E+08  | 1667800   | 8.6E+08   | 0        | 40174000  | 933820   | 30698000 |          |          |          |          |
| P62308 | P62308 | Small nuclear ribonucleoprotein G; Putative small   | RNRP;SN   | sp P62308 | 4  | 4  | 4  | 1  | 4  | 3  | 4  | 1  | 4  | 3  | 4  | 67.1 | 8.496  | 0      | 10.533 | 1.257E+09 | 27428000  | 6.33E+08  | 2220000   | 5.74E+08  | 51111000 | 40254000  | 10109000 | 20297000 |          |          |          |          |
| P38159 | P38159 | RNA-binding motif protein, X chromosome; RNA-t      | RNRM;RBN  | sp P38159 | 13 | 13 | 12 | 4  | 13 | 13 | 13 | 4  | 13 | 13 | 4  | 12   | 12     | 34     | 42.331 | 0         | 41.746    | 1.257E+09 | 1.03E+08  | 5.55E+08  | 11824000 | 4.81E+08  | 60127000 | 66111000 | 98041000 | 26949000 |          |          |
| P61764 | P61764 | Syntaxin-binding protein 1                          | STXB1     | sp P61764 | 12 | 12 | 12 | 0  | 8  | 1  | 12 | 0  | 8  | 1  | 12 | 31   | 67.568 | 0      | 60.235 | 1.255E+09 | 0         | 83491000  | 39700000  | 1.14E+09  | 0        | 13419000  | 21854000 | 42826000 |          |          |          |          |
| Q9Y5K5 | Q9Y5K5 | Ubiquitin carboxyl-terminal hydrolase isozyme L5    | UCHL5     | sp Q9Y5K5 | 14 | 14 | 14 | 0  | 14 | 1  | 10 | 0  | 14 | 1  | 10 | 62.9 | 37.606 | 0      | 95.98  | 1.255E+09 | 0         | 8.51E+08  | 753310    | 4.04E+08  | 0        | 85296000  | 84400    | 5124800  |          |          |          |          |
| P17858 | P17858 | ATP-dependent 6-phosphofructokinase, liver typ      | PFKL      | sp P17858 | 20 | 15 | 15 | 6  | 16 | 10 | 17 | 3  | 11 | 5  | 13 | 31.2 | 85.018 | 0      | 62.321 | 1.244E+09 | 2345300   | 3.11E+08  | 1362800   | 9.17E+08  | 1813600  | 3253800   | 8864800  | 3169800  |          |          |          |          |
| Q13617 | Q13617 | Cullin-2                                            | CUL2      | sp Q13617 | 16 | 16 | 16 | 0  | 11 | 16 | 0  | 11 | 16 | 0  | 11 | 16   | 24.2   | 86.982 | 0      | 49.752    | 1.243E+09 | 0         | 2.4E+08   | 263430    | 1E+09    | 0         | 7642000  | 799310   | 54124000 |          |          |          |
| Q9Y2A7 | Q9Y2A7 | Nck-associated protein 1                            | NCKAP1    | sp Q9Y2A7 | 21 | 21 | 21 | 0  | 13 | 4  | 20 | 0  | 13 | 4  | 20 | 24.1 | 128.79 | 0      | 134.29 | 1.242E+09 | 0         | 1.5E+08   | 4888500   | 1.09E+09  | 0        | 16533000  | 5261300  | 3943000  |          |          |          |          |
| P36507 | P36507 | Dual specificity mitogen-activated protein kinase   | 1 MAP2K1  | sp P36507 | 13 | 13 | 9  | 0  | 11 | 3  | 13 | 0  | 13 | 0  | 9  | 50.5 | 44.424 | 0      | 107.2  | 1.24E+09  | 0         | 2.32E+08  | 1549800   | 1.01E+09  | 0        | 18553000  | 135200   | 41143000 |          |          |          |          |
| Q9BQA1 | Q9BQA1 | Methyleno protein S0                                | WDR77     | sp Q9BQA1 | 8  | 8  | 8  | 0  | 8  | 4  | 5  | 0  | 8  | 4  | 5  | 43.9 | 36.724 | 0      | 30.565 | 1.239E+09 | 0         | 6.78E+08  | 12176000  | 5.49E+08  | 0        | 52089000  | 9970100  | 28485000 |          |          |          |          |
| Q9Y237 | Q9Y237 | Peptidyl-prolyl cis-trans isomerase NIMA-interact   | PIN4      | sp Q9Y237 | 5  | 5  | 5  | 0  | 5  | 0  | 5  | 0  | 5  | 0  | 5  | 0    | 5      | 55.7   | 13.81  | 0         | 16.415    | 1.235E+09 | 0         | 8.37E+08  | 0        | 3.98E+08  | 0        | 68472000 | 0        | 21697000 |          |          |
| Q15155 | Q15155 | Nodal modulator 1                                   | NOMO1     | sp Q15155 | 20 | 20 | 1  | 0  | 17 | 1  | 18 | 0  | 17 | 1  | 18 | 0    | 1      | 24     | 134.32 | 0         | 60.715    | 1.235E+09 | 0         | 3.93E+08  | 505760   | 8.42E+08  | 0        | 36017000 | 448470   | 43180000 |          |          |
| O15143 | O15143 | Actin-related protein 2/3 complex subunit 1B        | ANPC1B    | sp O15143 | 9  | 9  | 9  | 0  | 6  | 3  | 9  | 0  | 6  | 3  | 9  | 32.8 | 40.949 | 0      | 26.545 | 1.234E+09 | 0         | 8.4168000 | 4363000   | 1.15E+09  | 0        | 7809900   | 4068100  | 42180000 |          |          |          |          |
| P04439 | P04439 | HLA class I histocompatibility antigen, A-3 alpha   | HLA-A     | sp P04439 | 4  | 4  | 3  | 1  | 2  | 1  | 4  | 1  | 2  | 1  | 4  | 1    | 1      | 0      | 3      | 15.1      | 40.82     | 0         | 44.066    | 1.234E+09 | 81694000 | 44911000  | 6149500  | 1.1E+09  | 84257000 | 2912600  | 9493300  | 38349000 |
| P49792 | P49792 | E3 SUMO-protein ligase RanBP2                       | RANBP2    | sp P49792 | 28 | 28 | 5  | 18 | 15 | 25 | 5  | 18 | 15 | 25 | 5  | 18   | 15     | 25     | 15     | 38.824    | 0         | 78.399    | 1.231E+09 | 11416000  | 2E+08    | 42074000  | 9.78E+08 | 10513000 | 15345000 | 44668000 | 26987000 |          |
| O76021 | O76021 | Ribosomal L1 domain-containing protein 1            | RLSD1     | sp O76021 | 14 | 14 | 2  | 3  | 11 | 14 | 2  | 3  | 11 | 14 | 2  | 3    | 11     | 14     | 35.1   | 54.972    | 0         | 50.852    | 1.229E+09 | 2069800   | 51642000 | 13182000  | 1.04E+09 | 384540   | 4320200  | 11010000 | 22278000 |          |
| Q8Y167 | Q8Y167 | Ribonucleoprotein PTB-binding 1                     | RABT1     | sp Q8Y167 | 7  | 7  | 7  | 0  | 6  | 1  | 5  | 0  | 6  | 1  | 5  | 0    | 6      | 1      | 5      | 22.1      | 63.876    | 0         | 10.95     | 1.227E+09 | 0        | 7.17E+08  | 0        | 63577000 | 0        | 20605000 |          |          |
| Q9S256 | Q9S256 | Endoplasmic reticulum resident protein 44           | ERP44     | sp Q9S256 | 12 | 12 | 12 | 1  | 12 | 1  | 7  | 1  | 12 | 1  | 7  | 44.6 | 46.971 | 0      | 78.229 | 1.227E+09 | 216560    | 7.86E+08  | 492140    | 4.4E+08   | 936120   | 41476000  | 404800   | 25269000 |          |          |          |          |
| P61106 | P61106 | Ras-related protein Rab-14                          | RAB14     | sp P61106 | 9  | 9  | 9  | 0  | 8  | 3  | 9  | 0  | 8  | 3  | 9  | 49.8 | 23.897 | 0      | 35.824 | 1.226E+09 | 0         | 3.41E+08  | 644000    | 8.79E+08  | 0        | 26516000  | 4844800  | 39164000 |          |          |          |          |
| P62306 | P62306 | Small nuclear ribonucleoprotein F                   | SNRPF     | sp P62306 | 3  | 3  | 3  | 1  | 3  | 1  | 3  | 1  | 3  | 1  | 3  | 39.5 | 9.751  | 0      | 12.228 | 1.225E+09 | 8162700   | 5.14E+08  | 1515700   | 7.02E+08  | 45339000 | 8685300   | 3149000  | 3185500  |          |          |          |          |
| P10155 | P10155 | 60 kDa SS-A/Ro ribonucleoprotein                    | TROVE2    | sp P10155 | 11 | 11 | 1  | 10 | 2  | 9  | 1  | 10 | 2  | 9  | 1  | 10   | 2      | 9      | 29.7   | 60.627    | 0         | 68.269    | 1.224E+09 | 14078000  | 3.21E+08 | 6829700   | 8.32E+08 | 11371000 | 31466000 | 3570300  | 34372000 |          |
| Q15717 | Q15717 | ELAV-like protein 1                                 | ELAVL1    | sp Q15717 | 13 | 13 | 13 | 11 | 12 | 11 | 3  | 11 | 12 | 11 | 3  | 11   | 12     | 11     | 49.4   | 36.091    | 0         | 76.726    | 1.224E+09 | 73411000  | 4.1E+08  | 12158000  | 6.02E+08 | 1.05E+08 | 2824000  | 6622000  | 19671000 |          |
| Q8N1F7 | Q8N1F7 | Nuclear pore complex protein Nup93                  | NUP93     | sp Q8N1F7 | 23 | 23 | 23 | 2  | 22 | 13 | 20 | 2  | 22 | 13 | 20 | 28.1 | 93.487 | 0      | 62.22  | 1.222E+09 | 2628600   | 2.39E+08  | 35334000  | 9.45E+08  | 2695100  | 1902800   | 31582000 | 33007000 |          |          |          |          |
| Q6PIU2 | Q6PIU2 | Neutral cholesterol ester hydrolase 1               | NCEH1     | sp Q6PIU2 | 11 | 11 | 11 | 0  | 11 | 0  | 11 | 0  | 11 | 0  | 11 | 35.3 | 45.807 | 0      | 38.238 | 1.222E+09 | 0         | 0         | 0         | 0         | 0        | 1.22E+09  | 0        | 0        | 0        | 50248000 |          |          |
| P00568 | P00568 | Adenylyl kinase isoenzyme 1                         | AK1       | sp P00568 | 8  | 8  | 8  | 0  | 8  | 0  | 8  | 0  | 8  | 0  | 8  | 44.8 | 21.635 | 0      | 38.518 | 1.222E+09 | 0         | 2.37E+08  | 0         | 2.85E+08  | 0        | 20532000  | 0        | 40836000 |          |          |          |          |
| P48739 | P48739 | Phosphatidylinositol transfer protein beta isoform  | PITPNB    | sp P48739 | 13 | 13 | 10 | 1  | 12 | 0  | 10 | 1  | 12 | 0  | 10 | 1    | 12     | 50.2   | 31.54  | 0         | 36.877    | 1.217E+09 | 4.68E+08  | 952580    | 7.48E+08 | 0         | 52370000 | 67820    | 26730000 |          |          |          |
| P09012 | P09012 | U1 small nuclear ribonucleoprotein A                | SNRPA     | sp P09012 | 11 | 11 | 1  | 9  | 7  | 8  | 1  | 9  | 7  | 8  | 1  | 9    | 42.9   | 31.279 | 0      | 55.05     | 1.216E+09 | 9793900   | 5.61E+08  | 2533000   | 6.2E+08  | 9502300   | 51133000 | 10314000 | 24257000 |          |          |          |
| O95816 | O95816 | BAG family molecular chaperone regulator 2          | BAG2      | sp O95816 | 6  | 6  | 6  | 3  | 6  | 6  | 5  | 3  | 6  | 6  | 5  | 3    | 27.2   | 31.279 | 0      | 79.048    | 1.215E+09 | 67140000  | 8.2E+08   | 3559000   | 8.3E+08  | 60451000  | 30766000 | 35922000 | 22910000 |          |          |          |
| P11387 | P11387 | DNA topoisomerase 1                                 | TOP1      | sp P11387 | 18 | 18 | 1  | 15 | 16 | 14 | 1  | 15 | 16 | 14 | 1  | 15   | 16     | 14     | 24.3   | 90.725    | 0         | 37.556    | 1.214E+09 | 616710    | 2.95E+08 | 15216000  | 7.66E+08 | 6264500  | 1887900  | 79102000 | 56173000 |          |
| O00469 | O00469 | Procollagen-lysine, 2-oxoglutarate 5-dioxygenase    | : PLOD2   | sp O00469 | 15 | 15 | 15 | 0  | 13 | 6  | 15 | 0  | 13 | 6  | 15 | 0    | 13     | 6      | 15     | 27.4      | 84.865    | 0         | 105.89    | 1.211E+09 | 0        | 34644000  | 1305000  | 1.16E+09 | 0        | 3611600  | 2157300  | 53623000 |
| Q9BY44 | Q9BY44 | Eukaryotic translation initiation factor 2A;Eukary  | EIF2A     | sp Q9BY44 | 21 | 21 | 21 | 5  | 16 | 5  | 20 | 5  | 16 | 5  | 20 | 5    | 16     | 5      | 20     | 52.6      | 64.989    | 0         | 83.747    | 1.209E+09 | 8917200  | 3.11E+08  | 5878300  | 8.83E+08 | 14600000 | 18781000 | 1003000  | 31714000 |
| Q96R99 | Q96R99 | Elongation factor G, mitochondrial                  | GFM1      | sp Q96R99 | 17 | 17 | 17 | 1  | 16 | 0  | 17 | 1  | 16 | 0  | 17 | 3    | 17     | 3      | 17     | 71.078    | 1.206E+09 | 3247500   | 2.9E+08   | 0         | 9.12E+08 | 5756400   | 17919000 | 0        | 42684000 |          |          |          |
| Q13428 | Q13428 | Treacle protein                                     | TCOF1     | sp Q13428 | 27 | 27 | 27 | 3  | 25 | 21 | 22 | 3  | 25 | 21 | 22 | 21   | 22     | 21     | 22     | 21.6      | 152.1     | 0         | 78.847    | 1.206E+09 | 8199200  | 6.71E+08  | 73192000 | 4.54E+08 | 5202200  | 48468000 | 56324000 | 24988000 |
| O60493 | O60493 | Sorting nexin-3                                     | SNX3      | sp O60493 | 11 | 11 | 9  | 2  | 10 | 9  | 2  | 10 | 9  | 2  | 10 | 9    | 2      | 10     | 9      | 69.8      | 18.762    | 0         | 42.309    | 1.203E+09 | 2.56E+08 | 730690    | 9.46E+08 | 0        | 23128000 | 571120   | 38257000 |          |
| Q00688 | Q00688 | Peptidyl-prolyl cis-trans isomerase FKBP3           | FKBP3     | sp Q00688 | 8  | 8  | 8  | 1  | 6  | 2  | 8  | 1  | 6  | 2  | 8  | 8    | 33     | 25.177 | 0      | 21.333    | 1.19E+09  | 2300900   | 4.13E+08  | 1833400   | 7.84E+08 | 4989900   | 36683000 | 271500   | 28177000 |          |          |          |
| Q96K69 | Q96K69 | N-terminal kinase-like protein                      | SCYL1     | sp Q96K69 | 19 | 19 | 19 | 5  | 10 | 17 | 15 | 5  | 10 | 17 | 15 | 5    | 10     | 17     | 15     | 38.5      | 89.63     | 0         | 140.7     | 1.190E+09 | 2.24E+08 | 99574000  | 28652000 | 6.91E+08 | 2.41E+08 | 10303000 | 17713000 | 20464000 |
| P60953 | P60953 | Cell division control protein 42 homolog            | CDK42     | sp P60953 | 5  | 5  | 5  | 1  | 3  | 2  | 5  | 1  | 3  | 2  | 5  | 31.4 | 21.258 | 0      | 18.644 | 1.186E+09 | 1448600   | 2.32E+08  | 4698100   | 3.58E+08  | 2032300  | 137       |          |          |          |          |          |          |

|           |        |                                                      |            |           |    |    |    |   |    |    |    |   |    |    |    |    |    |    |      |        |        |          |           |           |           |           |           |          |          |          |          |           |          |
|-----------|--------|------------------------------------------------------|------------|-----------|----|----|----|---|----|----|----|---|----|----|----|----|----|----|------|--------|--------|----------|-----------|-----------|-----------|-----------|-----------|----------|----------|----------|----------|-----------|----------|
| Q9Y3B4    | Q9Y3B4 | Splicing factor 3B subunit 6                         | SF3B6      | sp Q9Y3B4 | 3  | 3  | 3  | 0 | 3  | 2  | 2  | 0 | 3  | 2  | 2  | 0  | 3  | 2  | 2    | 26.4   | 14.585 | 0        | 9.757     | 1.1E+09   | 0         | 5.92E+08  | 41347000  | 4.67E+08 | 0        | 51479000 | 29232000 | 18473000  |          |
| P20020_Q1 | P20020 | Plasma membrane calcium-transporting ATPase 1        | ATP2B1     | sp P20020 | 15 | 15 | 7  | 0 | 12 | 2  | 14 | 0 | 12 | 2  | 14 | 0  | 12 | 2  | 14   | 0      | 18.4   | 13.468   | 0         | 81.296    | 1.1E+09   | 0         | 1.89E+08  | 1275500  | 9.09E+08 | 0        | 13711000 | 1437900   | 39771000 |
| Q96PE2    | Q96PE2 | Rho guanine nucleotide exchange factor 17            | ARHGEF17   | sp Q96PE2 | 2  | 2  | 1  | 0 | 2  | 0  | 2  | 0 | 2  | 0  | 2  | 0  | 2  | 0  | 2    | 0      | 1.3    | 2.217    | 0.002869  | 1.1E+08   | 0         | 989910000 | 0         | 1.19E+08 | 0        | 65584000 | 0        | 0         |          |
| Q9H7Z7    | Q9H7Z7 | Prostaglandin E synthase 2;Prostaglandin E synth     | PTGES2     | sp Q9H7Z7 | 11 | 11 | 11 | 0 | 11 | 0  | 10 | 0 | 11 | 0  | 10 | 0  | 11 | 0  | 10   | 44     | 41.943 | 0        | 91.855    | 1.098E+09 | 0         | 6.36E+08  | 0         | 7.35E+08 | 0        | 33906000 | 0        | 28321000  |          |
| Q6WCQ1    | Q6WCQ1 | Myosin phosphatase Rho-interacting protein           | MRPI9      | sp Q6WCQ1 | 21 | 21 | 21 | 0 | 9  | 21 | 17 | 1 | 9  | 21 | 17 | 1  | 9  | 21 | 17   | 28.3   | 116.53 | 0        | 93.62     | 1.097E+09 | 12598000  | 64633000  | 238830000 | 5.06E+08 | 29477000 | 8737200  | 8434100  | 175490000 | 18243000 |
| P35249    | P35249 | Replication factor C subunit 4                       | RFC4       | sp P35249 | 9  | 9  | 9  | 0 | 1  | 9  | 7  | 1 | 9  | 7  | 9  | 1  | 9  | 7  | 9    | 35.5   | 39.681 | 0        | 88.55     | 1.094E+09 | 359590    | 3.34E+08  | 42809000  | 1.77E+08 | 791320   | 3863000  | 13995000 | 3463000   |          |
| O15511    | O15511 | Actin-related protein 2/3 complex subunit 5          | ARPC5      | sp O15511 | 9  | 9  | 6  | 0 | 7  | 7  | 7  | 0 | 7  | 7  | 7  | 0  | 7  | 7  | 6    | 64.9   | 16.32  | 0        | 23.579    | 1.093E+09 | 0         | 2.09E+08  | 4371000   | 8.8E+08  | 0        | 11410000 | 2562000  | 36236000  |          |
| Q9UBF2    | Q9UBF2 | Coatomer subunit gamma-2                             | COG2       | sp Q9UBF2 | 17 | 16 | 16 | 1 | 14 | 6  | 16 | 1 | 13 | 5  | 15 | 1  | 13 | 5  | 15   | 27.1   | 97.621 | 0        | 76.345    | 1.093E+09 | 884700    | 2.89E+08  | 8281100   | 7.95E+08 | 843610   | 29962000 | 2119100  | 31696000  |          |
| P09661    | P09661 | U2 small nuclear ribonucleoprotein A                 | SNRPA1     | sp P09661 | 10 | 10 | 10 | 4 | 10 | 5  | 8  | 0 | 10 | 5  | 8  | 4  | 10 | 5  | 8    | 44.3   | 28.415 | 0        | 53.215    | 1.092E+09 | 31927000  | 5.24E+08  | 28970000  | 5.06E+08 | 29477000 | 55481000 | 21588000 | 17615000  |          |
| Q13045    | Q13045 | Protein flightless-1 homolog                         | FLI1       | sp Q13045 | 15 | 15 | 0  | 0 | 7  | 13 | 13 | 0 | 0  | 7  | 13 | 13 | 0  | 0  | 7    | 19     | 144.75 | 0        | 120.95    | 1.09E+09  | 0         | 2.28E+08  | 64131000  | 7.99E+08 | 0        | 17494000 | 43162000 | 35474000  |          |
| Q14558    | Q14558 | Phosphoribosyl pyrophosphate synthase-associated     | PRPSAP1    | sp Q14558 | 10 | 10 | 9  | 0 | 8  | 3  | 9  | 0 | 8  | 3  | 9  | 0  | 8  | 3  | 9    | 40.2   | 39.393 | 0        | 66.684    | 1.089E+09 | 0         | 4.55E+08  | 5701200   | 6.25E+08 | 0        | 27698000 | 17860000 | 20076000  |          |
| Q9Y280    | Q9Y280 | Protein canyog homolog 2                             | CNPY2      | sp Q9Y280 | 5  | 5  | 5  | 1 | 5  | 1  | 5  | 1 | 5  | 1  | 5  | 1  | 5  | 1  | 5    | 37.9   | 20.652 | 0        | 19.999    | 1.089E+09 | 1740900   | 3.75E+08  | 999660    | 7.11E+08 | 2662900  | 31646000 | 2011700  | 21720000  |          |
| Q8TEQ6    | Q8TEQ6 | Gem-associated protein 5                             | GEM15      | sp Q8TEQ6 | 20 | 20 | 20 | 0 | 18 | 9  | 19 | 0 | 18 | 9  | 19 | 0  | 18 | 9  | 19   | 18.5   | 168.59 | 0        | 68.705    | 1.089E+09 | 0         | 8.32E+08  | 3761000   | 7.29E+08 | 0        | 28002000 | 27653000 | 27981000  |          |
| Q5SW79_C  | Q5SW79 | Centrosomal protein of 170 kDa                       | CEP170     | sp Q5SW79 | 24 | 24 | 24 | 5 | 19 | 19 | 22 | 5 | 19 | 19 | 22 | 5  | 19 | 19 | 22   | 26.5   | 175.29 | 0        | 81.826    | 1.088E+09 | 10599000  | 2.48E+08  | 87625000  | 7.42E+08 | 8749000  | 10095000 | 80676000 | 22461000  |          |
| Q9BWM7    | Q9BWM7 | Sideroflexin-3                                       | SFXN3      | sp Q9BWM7 | 10 | 10 | 10 | 1 | 3  | 6  | 9  | 1 | 3  | 6  | 9  | 1  | 3  | 6  | 9    | 38     | 35.503 | 0        | 34.789    | 1.088E+09 | 232620    | 1.34E+08  | 49173000  | 9.04E+08 | 1437000  | 8339900  | 16938000 | 55553000  |          |
| Q92538    | Q92538 | Golgi-specific brefeldin A-resistance guanine nucle  | GBF1       | sp Q92538 | 12 | 12 | 12 | 0 | 12 | 6  | 21 | 0 | 12 | 6  | 21 | 0  | 12 | 6  | 21   | 18.5   | 206.44 | 0        | 107.6     | 1.087E+09 | 0         | 1.29E+08  | 13716000  | 9.44E+08 | 0        | 17030000 | 7184900  | 35195000  |          |
| Q8TC12_Q  | Q8TC12 | Retinol dehydrogenase 11                             | RDH11      | sp Q8TC12 | 8  | 8  | 8  | 1 | 5  | 2  | 8  | 1 | 5  | 2  | 8  | 1  | 5  | 2  | 8    | 28.9   | 35.866 | 0        | 33.73     | 1.085E+09 | 956780    | 1.54E+08  | 2004300   | 9.28E+08 | 1092400  | 11791000 | 20857000 | 39076000  |          |
| Q14011    | Q14011 | Cold-inducible RNA-binding protein                   | CIRBP      | sp Q14011 | 5  | 5  | 5  | 0 | 5  | 5  | 5  | 0 | 5  | 5  | 5  | 0  | 5  | 5  | 5    | 38.4   | 18.648 | 0        | 76.762    | 1.075E+09 | 0         | 7.44E+08  | 2366000   | 3.07E+08 | 0        | 47003000 | 27520000 | 19401000  |          |
| P21291    | P21291 | Cysteine and glycine-rich protein 1                  | CSRP1      | sp P21291 | 6  | 6  | 6  | 1 | 0  | 3  | 6  | 1 | 0  | 3  | 6  | 1  | 0  | 3  | 6    | 50.8   | 20.567 | 0        | 59.474    | 1.071E+09 | 8557900   | 0         | 14166000  | 1.05E+09 | 7874800  | 0        | 10536000 | 42780000  |          |
| Q8TBC4    | Q8TBC4 | NEDD8-activating enzyme E1 catalytic subunit         | UBA3       | sp Q8TBC4 | 7  | 7  | 7  | 0 | 7  | 0  | 7  | 0 | 7  | 0  | 7  | 0  | 7  | 0  | 7    | 26.3   | 51.852 | 0        | 67.052    | 1.071E+09 | 0         | 5.2E+08   | 0         | 5.5E+08  | 0        | 43968000 | 0        | 24523000  |          |
| Q13547    | Q13547 | Histone deacetylase 1                                | HDAC1      | sp Q13547 | 9  | 9  | 9  | 5 | 1  | 8  | 3  | 7 | 1  | 8  | 3  | 7  | 1  | 8  | 3    | 7      | 0      | 0        | 0         | 48.407    | 1.069E+09 | 364980    | 3.38E+08  | 13191000 | 5.18E+08 | 975700   | 60524000 | 6768900   | 9658100  |
| Q8QWV7    | Q8QWV7 | Ataxin-2-like protein                                | ATXN2L     | sp Q8QWV7 | 19 | 19 | 19 | 3 | 15 | 13 | 18 | 3 | 15 | 13 | 18 | 3  | 15 | 13 | 18   | 27.5   | 113.02 | 0        | 67.327    | 1.068E+09 | 5817500   | 2.56E+08  | 3658000   | 7.7E+08  | 5529000  | 20793000 | 11033000 | 37389000  |          |
| P14980    | P14980 | Nuclear mitotic apparatus protein 1                  | NUMA1      | sp P14980 | 26 | 26 | 26 | 2 | 15 | 16 | 26 | 1 | 15 | 16 | 26 | 1  | 15 | 16 | 26   | 19.1   | 238.26 | 0        | 116.55    | 1.067E+09 | 1567700   | 3.16E+08  | 4191000   | 9.09E+08 | 3728800  | 1336000  | 25933000 | 33394000  |          |
| P29966    | P29966 | Myristylated alanine-rich C-kinase substrate         | MARCKS     | sp P29966 | 9  | 9  | 9  | 1 | 8  | 5  | 9  | 1 | 8  | 5  | 9  | 1  | 8  | 5  | 9    | 44     | 31.554 | 0        | 40.341    | 1.064E+09 | 1385400   | 3.49E+08  | 12299000  | 7.01E+08 | 1276400  | 29862000 | 7553300  | 26359000  |          |
| P52888    | P52888 | Thimet oligopeptidase                                | THOP1      | sp P52888 | 14 | 14 | 14 | 0 | 12 | 0  | 14 | 0 | 12 | 0  | 14 | 0  | 12 | 0  | 14   | 21.8   | 78.839 | 0        | 58.531    | 1.059E+09 | 0         | 2.86E+08  | 0         | 7.73E+08 | 0        | 2687000  | 0        | 30578000  |          |
| Q9Y3U8    | Q9Y3U8 | 60S ribosomal protein L36                            | RPL36      | sp Q9Y3U8 | 6  | 6  | 6  | 0 | 5  | 5  | 5  | 0 | 5  | 5  | 5  | 0  | 5  | 5  | 5    | 37.1   | 12.254 | 0        | 12.723    | 1.058E+09 | 0         | 3.06E+08  | 19352000  | 5.57E+08 | 0        | 29852000 | 12092000 | 2633000   |          |
| Q92734    | Q92734 | Protein TFG                                          | TFG        | sp Q92734 | 8  | 8  | 8  | 1 | 8  | 1  | 8  | 1 | 8  | 1  | 8  | 1  | 8  | 1  | 8    | 28.5   | 43.447 | 0        | 85.079    | 1.056E+09 | 32328000  | 4.09E+08  | 2812700   | 6.11E+08 | 20143000 | 30456000 | 3034400  | 32786000  |          |
| Q9Y4W6    | Q9Y4W6 | AFG3-like protein 2                                  | AFG3L2     | sp Q9Y4W6 | 20 | 20 | 19 | 1 | 20 | 7  | 17 | 1 | 20 | 7  | 17 | 1  | 19 | 6  | 16   | 30.4   | 88.583 | 0        | 98.991    | 1.053E+09 | 618670    | 5.73E+08  | 1636400   | 4.63E+08 | 993310   | 51999000 | 8399000  | 19782000  |          |
| Q9HC16    | Q9HC16 | Synaptic vesicle membrane protein VAT-1 homolog      | VAT1L      | sp Q9HC16 | 11 | 11 | 11 | 0 | 11 | 0  | 11 | 0 | 11 | 0  | 11 | 0  | 11 | 0  | 11   | 34.8   | 45.899 | 0        | 77.451    | 1.053E+09 | 0         | 0         | 1237500   | 1.05E+09 | 0        | 0        | 884130   | 43191000  |          |
| P14174    | P14174 | Macrophage migration inhibitory factor               | MIF        | sp P14174 | 2  | 2  | 2  | 0 | 2  | 0  | 2  | 0 | 2  | 0  | 2  | 0  | 2  | 0  | 2    | 27.8   | 12.476 | 0        | 18.43     | 1.05E+09  | 0         | 7.88E+08  | 0         | 6.2E+08  | 0        | 70568000 | 0        | 8292000   |          |
| P47813_Q1 | P47813 | Eukaryotic translation initiation factor 1A, X-chrom | EIF1AX;EIF | sp P47813 | 5  | 5  | 5  | 0 | 2  | 2  | 5  | 0 | 2  | 2  | 5  | 0  | 2  | 2  | 5    | 36.1   | 16.46  | 0        | 24.058    | 1.048E+09 | 0         | 4.88E+08  | 2461000   | 5.35E+08 | 0        | 43077000 | 23458000 | 15039000  |          |
| P15153    | P15153 | Ras-related G3 botulinum toxin substrate 2           | RAC2       | sp P15153 | 6  | 6  | 6  | 2 | 2  | 0  | 4  | 5 | 6  | 0  | 2  | 0  | 2  | 0  | 2    | 32.3   | 21.429 | 0        | 8.783     | 1.047E+09 | 0         | 0         | 6253300   | 1.04E+09 | 0        | 0        | 49792000 | 4021000   |          |
| Q96T76    | Q96T76 | MMS19 nucleotide excision repair protein homol       | MMS19      | sp Q96T76 | 15 | 15 | 15 | 0 | 14 | 6  | 12 | 0 | 14 | 6  | 12 | 0  | 14 | 6  | 12   | 20.3   | 113.29 | 0        | 63.724    | 1.046E+09 | 0         | 3.63E+08  | 1571000   | 6.67E+08 | 0        | 29913000 | 15742000 | 24243000  |          |
| O14786    | O14786 | Neuropilin-1                                         | NRP1       | sp O14786 | 4  | 4  | 4  | 1 | 3  | 16 | 1  | 3 | 16 | 1  | 3  | 16 | 1  | 3  | 16   | 28.2   | 103.13 | 0        | 71.516    | 1.045E+09 | 312560    | 1820000   | 8177600   | 1.04E+09 | 199710   | 143080   | 932700   | 47261000  |          |
| P35610    | P35610 | Sterol O-acyltransferase 1                           | SOAT1      | sp P35610 | 16 | 16 | 16 | 0 | 3  | 2  | 4  | 0 | 3  | 2  | 4  | 0  | 3  | 2  | 4    | 9.8    | 64.734 | 0        | 94.66     | 1.045E+09 | 0         | 78777000  | 1.174000  | 9.44E+08 | 0        | 668800   | 19836000 | 33857000  |          |
| P20337    | P20337 | Ras-related protein Rab-3B                           | RAB38      | sp P20337 | 4  | 4  | 4  | 0 | 1  | 3  | 5  | 0 | 1  | 3  | 4  | 0  | 1  | 3  | 4    | 40.6   | 24.758 | 0        | 58.488    | 1.043E+09 | 0         | 14397000  | 10957000  | 1.02E+09 | 0        | 1583600  | 4882000  | 43445000  |          |
| P49821    | P49821 | NADH dehydrogenase [ubiquinone] flavoprotein 1       | NDUFV1     | sp P49821 | 9  | 9  | 9  | 0 | 8  | 3  | 8  | 0 | 8  | 3  | 8  | 0  | 8  | 3  | 8    | 26.1   | 50.817 | 0        | 33.163    | 1.04E+09  | 0         | 3.16E+08  | 10713000  | 7.14E+08 | 0        | 27689000 | 6593400  | 30920000  |          |
| Q80574    | Q80574 | Cytochrome c1, heme protein, mitochondrial           | CYC1       | sp Q80574 | 6  | 6  | 6  | 4 | 6  | 0  | 6  | 4 | 6  | 0  | 6  | 4  | 6  | 0  | 6    | 28     | 35.422 | 0        | 32.415    | 1.038E+09 | 0         | 3.54E+08  | 23367000  | 6.6E+08  | 0        | 29345000 | 16127000 | 27808000  |          |
| Q9Y224    | Q9Y224 | UPF0568 protein C14orf166                            | C14orf166  | sp Q9Y224 | 8  | 8  | 8  | 0 | 6  | 6  | 7  | 0 | 6  | 6  | 7  | 0  | 6  | 6  | 7    | 43.9   | 28.068 | 0        | 30.455    | 1.036E+09 | 2.05E+08  | 2.06E+08  | 87891000  | 5.37E+08 | 2.28E+08 | 14613000 | 46521000 | 13651000  |          |
| Q6UB35    | Q6UB35 | Monofunctional C1-tetrahydrofolate synthase, mi      | MTHFD1L    | sp Q6UB35 | 14 | 14 | 14 | 0 | 13 | 2  | 12 | 0 | 13 | 2  | 12 | 0  | 13 | 2  | 12   | 18.1   | 105.79 | 0        | 52.721    | 1.035E+09 | 0         | 4.88E+08  | 2329100   | 5.44E+08 | 0        | 41688000 | 1486200  | 23799000  |          |
| Q9Y4K1    | Q9Y4K1 | Absent in melanoma 1 protein                         | AIM1       | sp Q9Y4K1 | 25 | 25 | 25 | 1 | 12 | 25 | 0  | 1 | 12 | 25 | 0  | 1  | 12 | 25 | 23.4 | 188.67 | 0      | 41.79300 | 1.033E+09 | 0         | 4.179300  | 4451000   | 9.84E+08  | 0        | 1295200  | 14751000 | 54730000 |           |          |
| P36543_Q  | P36543 | V-type proton ATPase subunit E 1                     | ATP6V1E1   | sp P36543 | 10 | 10 | 10 | 1 | 7  | 1  | 7  | 1 | 7  | 1  | 7  | 1  |    |    |      |        |        |          |           |           |           |           |           |          |          |          |          |           |          |

|          |         |                                                         |          |            |    |    |    |   |    |    |    |    |    |    |    |      |        |    |        |           |          |         |           |           |            |           |           |           |           |          |          |           |          |
|----------|---------|---------------------------------------------------------|----------|------------|----|----|----|---|----|----|----|----|----|----|----|------|--------|----|--------|-----------|----------|---------|-----------|-----------|------------|-----------|-----------|-----------|-----------|----------|----------|-----------|----------|
| Q05519   | Q05519  | Serine/arginine-rich splicing factor 11                 | SRSF11   | sp Q05511  | 7  | 7  | 7  | 2 | 6  | 3  | 5  | 2  | 6  | 3  | 5  | 24.4 | 53.542 | 0  | 19.201 | 971000000 | 25664000 | 5.8E+08 | 24306000  | 3.41E+08  | 60482000   | 27810000  | 10246000  | 8608000   |           |          |          |           |          |
| Q9UNF1;Q | Q9UNF1  | Melanoma-associated antigen D2                          | MAGED2   | sp Q9UNF   | 14 | 14 | 13 | 0 | 12 | 7  | 14 | 0  | 12 | 7  | 14 | 0    | 11     | 6  | 13     | 37.3      | 64.953   | 0       | 88.289    | 970340000 | 0.166E+08  | 17252000  | 7.87E+08  | 0         | 16121000  | 19239000 | 23251000 |           |          |
| Q7L5N1   | Q7L5N1  | COP9 signalosome complex subunit 6                      | COP56    | sp Q7L5N1  | 9  | 9  | 9  | 0 | 7  | 1  | 9  | 0  | 7  | 1  | 9  | 0    | 7      | 1  | 9      | 31.5      | 36.653   | 0       | 44.043    | 970130000 | 0.242E+08  | 407050    | 7.28E+08  | 0         | 39194000  | 1357000  | 10966000 |           |          |
| O00203;O | O00203  | AP-3 complex subunit beta-1                             | APB31    | sp O00203  | 18 | 18 | 18 | 2 | 15 | 7  | 14 | 2  | 15 | 7  | 14 | 2    | 15     | 7  | 14     | 17.9      | 121.32   | 0       | 75.201    | 969820000 | 1.761000   | 2.53E+08  | 28599000  | 6.87E+08  | 2625100   | 38301000 | 11891000 | 18683000  |          |
| P43034   | P43034  | Platelet-activating factor acetylhydrolase IB subunit A | PAFAH1B1 | sp P43034  | 11 | 11 | 11 | 0 | 11 | 4  | 11 | 0  | 11 | 4  | 11 | 0    | 11     | 4  | 11     | 28.8      | 46.637   | 0       | 41.265    | 968990000 | 0.25E+08   | 5703900   | 1.13E+08  | 0         | 13412000  | 7204300  | 26667000 |           |          |
| P54687   | P54687  | Branched-chain-amino-acid aminotransferase, cy          | BCAT1    | sp P54687  | 8  | 8  | 8  | 0 | 6  | 0  | 7  | 0  | 6  | 0  | 7  | 0    | 6      | 0  | 7      | 23.3      | 42.966   | 0       | 79.803    | 967410000 | 0.209E+08  | 0         | 7.58E+08  | 0         | 19375000  | 0        | 30246000 |           |          |
| Q96HC4   | Q96HC4  | PDZ and LIM domain protein 5                            | PDLIM5   | sp Q96HC4  | 14 | 14 | 14 | 0 | 6  | 0  | 7  | 0  | 6  | 0  | 7  | 0    | 6      | 0  | 7      | 23.3      | 63.944   | 0       | 60.733    | 965670000 | 0.51008000 | 14640000  | 9E+08     | 0         | 8764300   | 10614000 | 31979000 |           |          |
| P25685   | P25685  | Dnal homolog subfamily B member 1                       | DNAH1    | sp P25685  | 11 | 11 | 11 | 0 | 11 | 4  | 11 | 0  | 11 | 4  | 11 | 0    | 11     | 4  | 11     | 42.1      | 38.044   | 0       | 36.833    | 963510000 | 0.254E+08  | 4897400   | 7.04E+08  | 0         | 22218000  | 7406300  | 25046000 |           |          |
| P43897   | P43897  | Elongation factor T5, mitochondrial                     | TSFM     | sp P43897  | 6  | 6  | 6  | 0 | 5  | 0  | 6  | 0  | 5  | 0  | 6  | 0    | 5      | 0  | 6      | 29.8      | 35.39    | 0       | 80.717    | 963280000 | 0.444E+08  | 0         | 5.19E+08  | 0         | 99861000  | 0        | 20627000 |           |          |
| Q96K17   | Q96K17  | Transcription factor BTF3L1 homolog 4                   | BTF3L4   | sp Q96K17  | 8  | 7  | 7  | 0 | 8  | 1  | 6  | 0  | 7  | 1  | 5  | 0    | 7      | 1  | 5      | 60.1      | 17.27    | 0       | 63.392    | 961250000 | 0.527E+08  | 20477000  | 6.14E+08  | 0         | 38450000  | 15283000 | 23476000 |           |          |
| Q95163   | Q95163  | Elongator complex protein 1                             | HKRKP1   | sp Q95163  | 19 | 19 | 19 | 1 | 19 | 2  | 15 | 1  | 19 | 2  | 15 | 1    | 19     | 2  | 15     | 22.4      | 150.25   | 0       | 75.71     | 960260000 | 1.853000   | 5.18E+08  | 6937000   | 4.33E+08  | 2240100   | 47683000 | 30699000 | 17010000  |          |
| Q14696   | Q14696  | LDLR chaperone MSD                                      | MSSDC2   | sp Q14696  | 5  | 5  | 5  | 0 | 5  | 0  | 5  | 0  | 5  | 0  | 5  | 0    | 5      | 0  | 5      | 39.3      | 26.076   | 0       | 55.538    | 959920000 | 0.296E+08  | 0         | 6.64E+08  | 0         | 25951000  | 0        | 25752000 |           |          |
| Q99459   | Q99459  | Cell division cycle 5-like protein                      | CDCSL    | sp Q99459  | 18 | 18 | 18 | 1 | 16 | 17 | 12 | 1  | 16 | 17 | 12 | 1    | 16     | 17 | 12     | 1         | 16       | 17      | 64.841    | 959710000 | 832180     | 3.74E+08  | 90035000  | 4.95E+08  | 3276600   | 20733000 | 79478000 | 11146000  |          |
| Q982X2   | Q982X2  | Uridine-cytidine kinase 2                               | UCK2     | sp Q982X2  | 9  | 9  | 9  | 0 | 8  | 4  | 8  | 0  | 8  | 4  | 8  | 0    | 7      | 3  | 7      | 60.9      | 29.299   | 0       | 38.698    | 955610000 | 0.361E+08  | 18925000  | 5.76E+08  | 0         | 25871000  | 17581000 | 24739000 |           |          |
| Q99961;Q | Q99961  | Endophilin-A2                                           | SH3GL1   | sp Q99961  | 9  | 9  | 9  | 2 | 9  | 0  | 8  | 2  | 9  | 0  | 8  | 2    | 9      | 0  | 8      | 36.4      | 41.489   | 0       | 43.091    | 955200000 | 663580     | 4.56E+08  | 0         | 4.98E+08  | 1805400   | 46945000 | 0        | 8110100   |          |
| Q9H444   | Q9H444  | Aminopeptidase B                                        | RNPEP    | sp Q9H444  | 15 | 15 | 15 | 1 | 15 | 1  | 11 | 1  | 15 | 1  | 11 | 1    | 15     | 1  | 11     | 15        | 28.5     | 72.595  | 0         | 70.921    | 946840000  | 1431900   | 5.72E+08  | 1274600   | 6.73E+08  | 1438000  | 61563000 | 1112200   | 38006000 |
| Q9UB84   | Q9UB84  | Ataxin-10                                               | ATXN10   | sp Q9UB84  | 11 | 11 | 11 | 0 | 11 | 1  | 10 | 0  | 11 | 1  | 10 | 0    | 11     | 1  | 10     | 28.8      | 53.488   | 0       | 50.011    | 946180000 | 0.32E+08   | 1222600   | 6.25E+08  | 0         | 27203000  | 51320    | 24506000 |           |          |
| Q9NP72   | Q9NP72  | Ras-related protein Rab-18                              | RAB18    | sp Q9NP72  | 8  | 8  | 8  | 1 | 8  | 4  | 8  | 1  | 8  | 4  | 8  | 1    | 8      | 4  | 8      | 47.6      | 22.977   | 0       | 33.273    | 945160000 | 291830     | 1.97E+08  | 9314300   | 7.39E+08  | 1822700   | 27017000 | 9687300  | 19784000  |          |
| Q8NE71   | Q8NE71  | ATP-binding cassette sub-family F member 1              | ABCF1    | sp Q8NE71  | 16 | 16 | 16 | 3 | 15 | 10 | 15 | 3  | 15 | 10 | 15 | 3    | 15     | 10 | 15     | 26.4      | 95.925   | 0       | 62.487    | 942500000 | 16698000   | 4.79E+08  | 23912000  | 4.23E+08  | 22360000  | 37609000 | 19219000 | 11777000  |          |
| Q7L5D6   | Q7L5D6  | Golgi to ER traffic protein 4 homolog                   | GET4     | sp Q7L5D6  | 10 | 10 | 10 | 6 | 10 | 6  | 5  | 7  | 10 | 6  | 5  | 7    | 10     | 6  | 5      | 7         | 29.1     | 36.504  | 0         | 36.362    | 941620000  | 46426000  | 1.34E+08  | 497560000 | 2.64E+08  | 76708000 | 10454000 | 302400000 | 10478000 |
| P51153   | P51153  | Ras-related protein Rab-13                              | RAB13    | sp P51153  | 7  | 7  | 7  | 0 | 3  | 5  | 9  | 0  | 1  | 3  | 7  | 0    | 6      | 4  | 8      | 48.8      | 22.774   | 0       | 44.445    | 938640000 | 0.20215000 | 28448000  | 8.9E+08   | 0         | 2742400   | 7628800  | 41728000 |           |          |
| Q15006   | Q15006  | ER membrane protein complex subunit 2                   | EMC2     | sp Q15006  | 9  | 9  | 9  | 1 | 8  | 3  | 8  | 1  | 8  | 3  | 8  | 1    | 8      | 3  | 8      | 47.1      | 34.833   | 0       | 121.513   | 936910000 | 16436000   | 2.2E+08   | 1517300   | 6.97E+08  | 0         | 28614000 | 2412400  | 19396000  |          |
| P26885   | P26885  | Peptidyl-prolyl cis-trans isomerase FKBP2               | FKBP2    | sp P26885  | 6  | 6  | 6  | 1 | 6  | 1  | 6  | 1  | 6  | 1  | 6  | 1    | 6      | 1  | 6      | 57.7      | 15.649   | 0       | 36.758    | 936440000 | 1097700    | 3.74E+08  | 2149400   | 5.59E+08  | 888970    | 28984000 | 1067400  | 27577000  |          |
| P12183   | P12183  | V-type proton ATPase subunit C1                         | ATP6V1C1 | sp P12183  | 14 | 14 | 14 | 0 | 12 | 12 | 0  | 12 | 12 | 0  | 12 | 12   | 0      | 12 | 12     | 49.9      | 43.941   | 0       | 48.852    | 935790000 | 0.196E+08  | 2639300   | 3.7E+08   | 0         | 10260000  | 3000100  | 35839000 |           |          |
| Q9Y678   | Q9Y678  | SEC23-interacting protein                               | SEC23IP  | sp Q9Y678  | 14 | 14 | 14 | 1 | 12 | 0  | 12 | 1  | 12 | 0  | 12 | 1    | 12     | 0  | 12     | 17.9      | 111.08   | 0       | 39.249    | 933440000 | 332850     | 3.31E+08  | 0         | 6.02E+08  | 1132200   | 44601000 | 0        | 8552200   |          |
| Q75844   | Q75844  | CAAX prenyl protease 1 homolog                          | ZMPSTE24 | sp Q75844  | 11 | 11 | 11 | 0 | 8  | 0  | 11 | 0  | 8  | 0  | 11 | 0    | 8      | 0  | 11     | 32.4      | 54.812   | 0       | 64.202    | 933020000 | 0.24E+08   | 0         | 6.09E+08  | 0         | 30259000  | 0        | 23343000 |           |          |
| Q8W1E2   | Q8W1E2  | Protein NXP20                                           | FAM114A1 | sp Q8W1E2  | 8  | 8  | 8  | 0 | 1  | 8  | 0  | 1  | 8  | 0  | 1  | 8    | 0      | 1  | 8      | 22.7      | 60.741   | 0       | 71.866    | 930990000 | 0          | 0         | 711030    | 9.3E+08   | 0         | 477810   | 38258000 |           |          |
| Q14978   | Q14978  | Nucleolar and coiled-body phosphoprotein 1              | NOL1     | sp Q14978  | 16 | 16 | 16 | 4 | 14 | 14 | 12 | 4  | 14 | 14 | 12 | 4    | 14     | 14 | 12     | 24.3      | 73.602   | 0       | 47.983    | 922850000 | 37508000   | 4.58E+08  | 86735000  | 5.01E+08  | 45703000  | 40725000 | 48176000 | 14717000  |          |
| Q9H4K6   | Q9H4K6  | BoLA-like protein 2                                     | BOILA2   | sp Q9H4K6  | 4  | 4  | 4  | 2 | 4  | 2  | 4  | 2  | 4  | 2  | 4  | 2    | 4      | 2  | 4      | 50        | 11.16    | 0       | 33.287    | 922480000 | 24825000   | 4.18E+08  | 10317000  | 3.4E+08   | 39485000  | 10264000 | 71924000 |           |          |
| Q116629  | Q116629 | Serine/arginine-rich splicing factor 7                  | SRSF7    | sp Q116629 | 5  | 4  | 4  | 1 | 3  | 4  | 5  | 1  | 2  | 3  | 4  | 1    | 2      | 3  | 4      | 22.3      | 27.366   | 0       | 14.827    | 921840000 | 3359700    | 3.31E+08  | 81821000  | 5.05E+08  | 138640000 | 25959000 | 44028000 | 24487000  |          |
| P08397   | P08397  | Porphobilinogen deaminase                               | HMB5     | sp P08397  | 8  | 8  | 8  | 0 | 8  | 0  | 8  | 0  | 8  | 0  | 8  | 0    | 8      | 0  | 8      | 0         | 7        | 27.7    | 39.33     | 0         | 46.556     | 920680000 | 0.409E+08 | 0         | 4.11E+08  | 0        | 39839000 | 0         | 16760000 |
| P05386   | P05386  | 60S acidic ribosomal protein P1                         | RPLP1    | sp P05386  | 1  | 1  | 1  | 0 | 1  | 1  | 0  | 1  | 1  | 0  | 1  | 1    | 0      | 1  | 1      | 14        | 11.514   | 0       | 5.6563    | 920250000 | 0.427E+08  | 57283000  | 4.35E+08  | 0         | 37212000  | 39467000 | 17407000 |           |          |
| Q9NS69   | Q9NS69  | Mitochondrial import receptor subunit TOM22 h           | TOM22    | sp Q9NS69  | 6  | 6  | 6  | 1 | 4  | 2  | 6  | 1  | 4  | 2  | 6  | 1    | 4      | 2  | 6      | 66.2      | 15.221   | 0       | 51.599    | 919630000 | 2959800    | 2.08E+08  | 7761000   | 7.01E+08  | 3880700   | 21292000 | 9323700  | 25597000  |          |
| Q9H444;Q | Q9H444  | Charged multivesicular body protein 4b                  | CHMP4B   | sp Q9H444  | 6  | 6  | 6  | 1 | 5  | 4  | 6  | 1  | 5  | 4  | 6  | 1    | 5      | 4  | 6      | 29        | 24.95    | 0       | 23.223    | 918940000 | 366380     | 2.22E+08  | 14685000  | 6.82E+08  | 1557200   | 30358000 | 8112500  | 13353000  |          |
| Q9P2R3   | Q9P2R3  | Rabankyrin-5                                            | ANKYR1   | sp Q9P2R3  | 16 | 16 | 16 | 0 | 12 | 1  | 16 | 0  | 12 | 1  | 16 | 0    | 12     | 1  | 16     | 21.2      | 128.4    | 0       | 15.54E+08 | 918880000 | 0.154E+08  | 1514500   | 7.63E+08  | 0         | 7465200   | 2093900  | 36439000 |           |          |
| Q9NT26   | Q9NT26  | RNA-binding protein 12                                  | RBM12    | sp Q9NT26  | 14 | 14 | 14 | 0 | 14 | 1  | 14 | 0  | 14 | 1  | 14 | 0    | 14     | 1  | 14     | 17.7      | 97.394   | 0       | 33.9      | 917440000 | 0.345E+08  | 2176200   | 5.7E+08   | 0         | 20735000  | 5336000  | 28648000 |           |          |
| Q95232   | Q95232  | Luc7-like protein 3                                     | LUC7L3   | sp Q95232  | 8  | 8  | 8  | 2 | 8  | 4  | 6  | 2  | 8  | 4  | 6  | 2    | 8      | 4  | 6      | 24.3      | 51.466   | 0       | 44.128    | 914350000 | 13287000   | 3.05E+08  | 20460000  | 5.75E+08  | 28312000  | 20030000 | 19238000 | 9028000   |          |
| Q9UNZ2   | Q9UNZ2  | NSFL1 cofactor p47                                      | NSFL1C   | sp Q9UNZ2  | 13 | 13 | 13 | 0 | 11 | 13 | 0  | 11 | 13 | 0  | 11 | 13   | 0      | 11 | 13     |           |          |         |           |           |            |           |           |           |           |          |          |           |          |

|                      |                      |                                                                   |               |          |    |    |    |    |    |    |    |   |    |    |    |    |    |    |      |        |          |        |           |           |           |           |           |          |          |          |           |          |          |          |          |
|----------------------|----------------------|-------------------------------------------------------------------|---------------|----------|----|----|----|----|----|----|----|---|----|----|----|----|----|----|------|--------|----------|--------|-----------|-----------|-----------|-----------|-----------|----------|----------|----------|-----------|----------|----------|----------|----------|
| P67812               | P67812               | Signal peptidase complex catalytic subunit SEC11A                 | SEC11A        | pP67812  | 5  | 5  | 5  | 0  | 5  | 3  | 5  | 0 | 5  | 3  | 5  | 0  | 5  | 3  | 5    | 20.7   | 20.625   | 0      | 26.495    | 834860000 | 0         | 2.09E+08  | 4936300   | 6.21E+08 | 0        | 18028000 | 4476700   | 24751000 |          |          |          |
| P50402               | P50402               | Emerin                                                            | EMD           | pP50402  | 11 | 11 | 11 | 3  | 11 | 11 | 9  | 3 | 11 | 11 | 9  | 3  | 11 | 11 | 9    | 63.8   | 28.994   | 0      | 72.941    | 833910000 | 9612100   | 4.84E+08  | 78376000  | 2.62E+08 | 12774000 | 2997300  | 64203000  | 8775000  |          |          |          |
| O95573               | O95573               | Long-chain-fatty-acyl-CoA ligase 3                                | ACSL3         | pP095573 | 14 | 13 | 13 | 1  | 4  | 7  | 14 | 1 | 6  | 13 | 1  | 6  | 13 | 1  | 31.5 | 80.419 | 0        | 67.204 | 832180000 | 2395600   | 36471000  | 1.968000  | 7.74E+08  | 2674200  | 4079600  | 16000000 | 33097000  |          |          |          |          |
| P31350               | P31350               | Ribonucleoside-diphosphate reductase subunit MR2                  | MR2           | pP31350  | 6  | 6  | 5  | 0  | 6  | 0  | 6  | 0 | 6  | 0  | 6  | 0  | 6  | 0  | 5    | 24.7   | 44.877   | 0      | 31.283    | 829910000 | 0         | 1.18E+08  | 0         | 7.12E+08 | 0        | 12043000 | 0         | 27654000 |          |          |          |
| P46087               | P46087               | Probable 28S rRNA (cytosine(4447)-C(5))-methylase                 | NOP2          | pP46087  | 20 | 20 | 20 | 1  | 14 | 18 | 17 | 1 | 14 | 18 | 17 | 1  | 14 | 18 | 17   | 33.5   | 89.301   | 0      | 52.095    | 829490000 | 5044000   | 1.37E+08  | 208120000 | 4.8E+08  | 6845000  | 13020000 | 133120000 | 23687000 |          |          |          |
| O00442               | O00442               | RNA 3-terminal phosphate cyclase                                  | RTCA          | pP000442 | 8  | 8  | 8  | 0  | 6  | 1  | 8  | 0 | 6  | 1  | 8  | 0  | 6  | 1  | 8    | 30.6   | 39.336   | 0      | 42.24     | 829450000 | 0         | 1.39E+08  | 1499900   | 6.89E+08 | 0        | 24611000 | 4139600   | 13311000 |          |          |          |
| O75348;O75348;O75348 | O75348;O75348;O75348 | V-type proton ATPase subunit G 1;V-type proton ATPase subunit G 1 | ATP6V1G1      | pP075348 | 4  | 4  | 4  | 0  | 3  | 1  | 3  | 0 | 3  | 1  | 3  | 0  | 3  | 1  | 3    | 30.5   | 13.757   | 0      | 68.781    | 828740000 | 0         | 2.39E+08  | 1287400   | 8.9E+08  | 0        | 24916000 | 5581900   | 15614000 |          |          |          |
| O00194               | O00194               | Ras-related protein Rab-27B                                       | RAB27B        | pP000194 | 6  | 6  | 4  | 0  | 0  | 1  | 6  | 0 | 0  | 1  | 6  | 0  | 0  | 1  | 6    | 30.3   | 24.608   | 0      | 23.519    | 828430000 | 0         | 3.2E+08   | 0         | 1342900  | 8.27E+08 | 0        | 902420    | 34014000 |          |          |          |
| O93H97               | O93H97               | Golgi-resident protein GCP20                                      | ACB03         | pP093H97 | 10 | 10 | 10 | 0  | 10 | 0  | 9  | 0 | 10 | 0  | 9  | 0  | 10 | 0  | 9    | 32     | 60.593   | 0      | 100.18    | 828020000 | 0         | 3.2E+08   | 0         | 5.08E+08 | 0        | 24282000 | 0         | 21243000 |          |          |          |
| O92783               | O92783               | Signal transducing adaptor molecule 1                             | STAM          | pP092783 | 9  | 9  | 8  | 1  | 8  | 1  | 9  | 1 | 8  | 1  | 9  | 1  | 8  | 1  | 9    | 27.4   | 59.119   | 0      | 63.967    | 825190000 | 4949300   | 1.73E+08  | 735740    | 6.52E+08 | 632270   | 3785100  | 632290    | 38013000 |          |          |          |
| O75947               | O75947               | ATP synthase subunit 6, mitochondrial                             | ATP5F         | pP075947 | 8  | 8  | 8  | 2  | 8  | 2  | 8  | 2 | 8  | 2  | 8  | 2  | 8  | 2  | 8    | 64     | 18.491   | 0      | 26.355    | 824030000 | 1846300   | 11632000  | 4.25E+08  | 4098600  | 33520000 | 6013000  | 18284000  |          |          |          |          |
| O985H4               | O985H4               | Translational activator of cytochrome c oxidase 1                 | TACO1         | pP0985H4 | 6  | 6  | 6  | 0  | 6  | 1  | 5  | 0 | 6  | 1  | 5  | 0  | 6  | 1  | 5    | 31.6   | 32.477   | 0      | 32.189    | 823850000 | 0         | 2.48E+08  | 2118300   | 5.74E+08 | 0        | 12462000 | 3098100   | 31345000 |          |          |          |
| O98TV4               | O98TV4               | Transmembrane protein 43                                          | TMEM43        | pP098TV4 | 10 | 10 | 10 | 1  | 4  | 7  | 9  | 1 | 4  | 7  | 9  | 1  | 4  | 7  | 9    | 38.8   | 44.875   | 0      | 62.067    | 823780000 | 1438600   | 65988000  | 28798000  | 7.28E+08 | 4016400  | 5831600  | 11156000  | 35525000 |          |          |          |
| P51452               | P51452               | Dual specificity protein phosphatase 3                            | DUSP3         | pP51452  | 6  | 6  | 6  | 0  | 6  | 2  | 6  | 0 | 6  | 2  | 6  | 0  | 6  | 2  | 6    | 41.6   | 20.478   | 0      | 32.236    | 822690000 | 0         | 2.44E+08  | 1809900   | 5.77E+08 | 0        | 26270000 | 1479500   | 18675000 |          |          |          |
| Q12765               | Q12765               | Secernin-1                                                        | SCRN1         | pP12765  | 8  | 8  | 8  | 0  | 8  | 1  | 7  | 0 | 8  | 1  | 7  | 0  | 8  | 1  | 7    | 24.4   | 46.382   | 0      | 31.382    | 822210000 | 0         | 1.63E+08  | 403860    | 6.59E+08 | 0        | 6822400  | 735810    | 34190000 |          |          |          |
| O75717               | O75717               | WD repeat and HMGB-box DNA-binding protein 1                      | WHDH1         | pP075717 | 18 | 18 | 18 | 1  | 12 | 2  | 17 | 1 | 12 | 2  | 17 | 1  | 12 | 2  | 17   | 24.2   | 125.97   | 0      | 111.93    | 822040000 | 1140900   | 1.39E+08  | 2908200   | 6.79E+08 | 1334800  | 8899900  | 1667900   | 31354000 |          |          |          |
| O8Y1T4               | O8Y1T4               | Katanin p60 ATPase-containing subunit A-like 2                    | KATNAL2       | pP08Y1T4 | 1  | 1  | 1  | 0  | 1  | 1  | 1  | 0 | 1  | 1  | 1  | 0  | 1  | 1  | 2.2  | 61.252 | 0.000485 | 3.4349 | 818470000 | 0         | 2.44E+08  | 13990000  | 5.61E+08  | 0        | 21483000 | 9401300  | 23062000  |          |          |          |          |
| P09417               | P09417               | Dihydropteridine reductase                                        | QDPR          | pP09417  | 7  | 7  | 7  | 0  | 6  | 0  | 7  | 0 | 6  | 0  | 7  | 0  | 6  | 0  | 7    | 41.8   | 25.789   | 0      | 37.43     | 817150000 | 0         | 2.73E+08  | 0         | 4.45E+08 | 0        | 2487000  | 0         | 21635000 |          |          |          |
| O95394               | O95394               | Phosphoacetylglucosamine mutase                                   | PGM3          | pP095394 | 11 | 11 | 11 | 0  | 9  | 0  | 9  | 0 | 9  | 0  | 9  | 0  | 9  | 0  | 9    | 32.3   | 59.851   | 0      | 123.59    | 816260000 | 0         | 4.87E+08  | 0         | 3.29E+08 | 0        | 44358000 | 0         | 12119000 |          |          |          |
| O63HN8               | O63HN8               | E3 ubiquitin-protein ligase RNF213                                | RNF213        | pP063HN8 | 20 | 20 | 20 | 8  | 8  | 19 | 0  | 8 | 8  | 19 | 0  | 8  | 8  | 19 | 6.4  | 59.14  | 0        | 98.862 | 815560000 | 0         | 4.9899000 | 18904000  | 1.47E+08  | 0        | 4833500  | 29274000 | 13705000  |          |          |          |          |
| O14964               | O14964               | Hepatocyte growth factor-regulated tyrosine kinase HGS            | HGS           | pP014964 | 12 | 12 | 12 | 0  | 3  | 11 | 0  | 3 | 11 | 0  | 3  | 11 | 0  | 3  | 11   | 21.5   | 86.191   | 0      | 54.706    | 815260000 | 0         | 1.5E+08   | 1906000   | 6.63E+08 | 0        | 12477000 | 2089800   | 26449000 |          |          |          |
| P53007               | P53007               | Tricarboxylate transport protein, mitochondrial                   | SLC25A1       | pP53007  | 10 | 10 | 10 | 1  | 7  | 8  | 10 | 1 | 7  | 8  | 10 | 1  | 7  | 8  | 10   | 39.2   | 34.012   | 0      | 23.836    | 815120000 | 2064900   | 2.29E+08  | 41059000  | 5.43E+08 | 6039900  | 15982000 | 21098000  | 99007000 |          |          |          |
| P16401               | P16401               | Histone H1.5                                                      | HIST1H1B      | pP16401  | 10 | 10 | 10 | 1  | 2  | 8  | 10 | 1 | 2  | 8  | 10 | 1  | 2  | 8  | 10   | 35     | 22.758   | 0      | 23.498    | 814940000 | 72082     | 4.6989000 | 103640000 | 6.64E+08 | 4255900  | 11695000 | 63172000  | 22051000 |          |          |          |
| O969H8               | O969H8               | Myeloid-derived growth factor                                     | MYDGF         | pP0969H8 | 4  | 4  | 4  | 0  | 4  | 0  | 4  | 0 | 4  | 0  | 4  | 0  | 4  | 0  | 4    | 27.2   | 18.295   | 0      | 13.138    | 814330000 | 0         | 2.47E+08  | 0         | 6.57E+08 | 0        | 20610000 | 0         | 24505000 |          |          |          |
| Q15388               | Q15388               | Mitochondrial import receptor subunit TOM20 h                     | TOM20         | pP15388  | 4  | 4  | 4  | 1  | 4  | 3  | 3  | 1 | 4  | 3  | 3  | 1  | 4  | 3  | 3    | 32.4   | 16.298   | 0      | 26.072    | 813860000 | 3057300   | 4.52E+08  | 59394000  | 3E+08    | 9418200  | 28203000 | 42077000  | 15420000 |          |          |          |
| Q8Y1B3               | Q8Y1B3               | Serine/arginine repetitive matrix protein 1                       | SRRM1         | pP08Y1B3 | 7  | 7  | 7  | 4  | 4  | 4  | 4  | 4 | 4  | 4  | 4  | 4  | 4  | 4  | 4    | 11.5   | 102.33   | 0      | 33.828    | 813750000 | 64157000  | 5.85E+08  | 30359000  | 1.34E+08 | 69555000 | 36139000 | 30399000  | 9141600  |          |          |          |
| O75477               | O75477               | Erin-1                                                            | ERL1          | pP075477 | 12 | 10 | 10 | 1  | 9  | 7  | 11 | 0 | 9  | 7  | 11 | 0  | 9  | 7  | 11   | 38.5   | 39.171   | 0      | 43.779    | 813700000 | 5963800   | 1.03E+08  | 28644000  | 6.74E+08 | 8322200  | 11969000 | 19092000  | 22605000 |          |          |          |
| Q13217               | Q13217               | Dnal homolog subfamily C member 3                                 | DNAIC3        | pP13217  | 12 | 12 | 12 | 1  | 10 | 1  | 9  | 1 | 10 | 1  | 9  | 1  | 10 | 1  | 9    | 39.1   | 57.579   | 0      | 140.29    | 811060000 | 529870    | 1.31E+08  | 516690    | 4.97E+08 | 366650   | 17699000 | 594090    | 30239000 |          |          |          |
| O9NZL4               | O9NZL4               | Hsp70-binding protein 1                                           | HSPBP1        | pP09NZL4 | 9  | 9  | 9  | 0  | 6  | 0  | 9  | 0 | 6  | 0  | 9  | 0  | 6  | 0  | 9    | 39.3   | 39.302   | 0      | 42.714    | 810110000 | 0         | 0         | 1.21E+08  | 0        | 6.9E+08  | 0        | 5106000   | 0        | 23967000 |          |          |
| P61619               | P61619               | Protein transport protein SecE1 subunit alpha iso                 | SEC61A1       | pP61619  | 7  | 7  | 7  | 4  | 2  | 7  | 5  | 7 | 2  | 7  | 5  | 7  | 2  | 7  | 5    | 7      | 2        | 4      | 17.9      | 52.764    | 0         | 26.854    | 809340000 | 2757100  | 1.53E+08 | 20769000 | 6.32E+08  | 6228200  | 1323300  | 14138000 | 22487000 |
| O8WXF1               | O8WXF1               | Paraspeckle component 1                                           | PSPC1         | pP08WXF1 | 13 | 12 | 12 | 2  | 13 | 7  | 12 | 2 | 13 | 7  | 12 | 2  | 13 | 7  | 12   | 30.6   | 58.243   | 0      | 57.052    | 806580000 | 4310900   | 5.43E+08  | 2873600   | 2.31E+08 | 6451000  | 46643000 | 1771000   | 1014000  |          |          |          |
| Q7U136;Q7U136;P6     | Q7U136;Q7U136;P6     | Tubulin alpha-1A chain;Tubulin alpha-3E chain                     | TUBA1A;TUBA1E | pP07U136 | 27 | 2  | 1  | 20 | 27 | 22 | 27 | 2 | 1  | 20 | 27 | 2  | 1  | 20 | 1    | 69.6   | 50.135   | 0      | 73.523    | 806080000 | 0         | 2.52E+08  | 11251000  | 5.43E+08 | 0        | 20617000 | 11107000  | 20383000 |          |          |          |
| Q9UM00               | Q9UM00               | Transmembrane and coiled-coil domain-containing                   | TMC01         | pP09UM00 | 4  | 4  | 4  | 0  | 2  | 4  | 3  | 0 | 2  | 4  | 3  | 0  | 2  | 4  | 3    | 20.1   | 27.079   | 0      | 13.71     | 805420000 | 0         | 1.09E+08  | 25372000  | 6.71E+08 | 0        | 9877600  | 16466000  | 26437000 |          |          |          |
| P13489               | P13489               | Ribonuclease inhibitor                                            | RNH1          | pP13489  | 7  | 7  | 7  | 0  | 4  | 2  | 7  | 0 | 4  | 2  | 7  | 0  | 4  | 2  | 7    | 23.6   | 49.973   | 0      | 61.791    | 804630000 | 0         | 1.1E+08   | 7753500   | 6.87E+08 | 0        | 13135000 | 5754000   | 22002000 |          |          |          |
| P49189               | P49189               | 4-trimethylaminobutylaldehyde dehydrogenase                       | ALDH9A1       | pP49189  | 13 | 13 | 13 | 0  | 12 | 2  | 12 | 0 | 12 | 2  | 12 | 0  | 12 | 2  | 12   | 29.6   | 53.801   | 0      | 52.794    | 804540000 | 0         | 4.54E+08  | 1783000   | 3.48E+08 | 0        | 47189000 | 769290    | 7628400  |          |          |          |
| O9NX46               | O9NX46               | Poly(ADP-ribose) glycohydrolase ARH3                              | ADPRHL2       | pP09NX46 | 8  | 8  | 8  | 1  | 8  | 0  | 7  | 1 | 8  | 0  | 7  | 1  | 8  | 0  | 7    | 31.7   | 38.946   | 0      | 41.975    | 804080000 | 1064300   | 3.22E+08  | 0         | 4.81E+08 | 1515900  | 29297000 | 0         | 13911000 |          |          |          |
| O9BV20               | O9BV20               | Methylthioribose-1-phosphate isomerase                            | MR1           | pP09BV20 | 10 | 10 | 10 | 0  | 6  | 0  | 6  | 0 | 6  | 0  | 6  | 0  | 6  | 0  | 6    | 44.2   | 39.149   | 0      | 34.086    | 802890000 | 0         | 6.62E+08  | 0         | 1.41E+08 | 0        | 53710000 | 0         | 8366600  |          |          |          |
| P19474               | P19474               | E3 ubiquitin-protein ligase TRIM21                                | TRIM21        | pP19474  | 15 | 15 | 15 | 2  | 1  | 15 | 4  | 2 | 1  | 15 | 4  | 2  | 1  | 15 | 4    | 34.5   | 54.169   | 0      | 74.866    | 800570000 | 1381800   | 8667200   | 764750000 | 25770000 | 281680   | 209450   | 504410000 | 2917300  |          |          |          |
| O9HC1E               | O9HC1E               | Putative helix MOV-10                                             | MOV10         | pP09HC1E | 16 | 16 | 16 | 4  | 15 | 9  | 15 | 4 | 15 | 9  | 15 | 4  | 15 | 9  | 15   | 18.8   | 177.380  | 0      | 47.897    | 800250000 | 1.48E+08  | 2.55E+08  | 35.19000  | 3.6E+08  | 1.34E+08 | 17783000 | 48657000  | 9717000  |          |          |          |
| O9HC35               | O9HC35               | Echinoderm microtubule-associated protein-like                    | EML4          | pP09HC35 | 14 | 14 | 14 | 2  | 11 | 1  | 14 | 2 | 11 | 1  | 14 | 2  | 11 | 1  | 14   | 20.2   | 108.91   | 0      | 33.559    | 799120000 | 3150000   | 2.19E+08  | 1571300   | 5.76E+08 | 2992400  | 18777000 | 1319400   | 24063000 |          |          |          |
| O9NX58               | O9NX58               | Cell growth-regulating nuclear protein                            | LYAR          | pP09NX58 | 12 | 12 | 12 | 9  | 11 | 9  | 11 | 9 | 11 | 9  | 11 | 9  | 11 | 9  | 11   | 9      | 43       | 43.624 | 0         | 73.728    | 796950000 | 25732000  | 2.68E+08  | 10397000 | 4E+08    | 31273000 | 22363000  | 72025000 | 9963700  |          |          |
| O92696               | O92696               | Geryonine(aryl) transferase type-2 subunit alpha                  | RABGGTA       | pP092696 | 5  | 5  | 5  | 1  | 4  | 0  | 5  | 1 | 4  | 0  | 5  | 1  | 4  | 0  | 5    | 10.2   | 65.071   | 0      | 45.8      |           |           |           |           |          |          |          |           |          |          |          |          |



|               |        |                                                         |         |           |    |    |    |   |    |    |    |    |    |    |    |    |    |    |    |      |        |        |         |           |           |           |           |           |          |          |          |          |          |          |
|---------------|--------|---------------------------------------------------------|---------|-----------|----|----|----|---|----|----|----|----|----|----|----|----|----|----|----|------|--------|--------|---------|-----------|-----------|-----------|-----------|-----------|----------|----------|----------|----------|----------|----------|
| Q9Y277        | Q9Y277 | Voltage-dependent anion-selective channel prote         | VDAC3   | sj Q9Y277 | 8  | 8  | 8  | 1 | 8  | 2  | 6  | 1  | 8  | 2  | 6  | 1  | 8  | 2  | 6  | 36.7 | 30.658 | 0      | 23.889  | 745490000 | 2892500   | 6.17E+08  | 5327800   | 1.2E+08   | 2452800  | 51843000 | 3644500  | 5054400  |          |          |
| Q13084        | Q13084 | 39S ribosomal protein L28, mitochondrial                | MRPL28  | sj Q13084 | 11 | 11 | 11 | 1 | 9  | 3  | 9  | 1  | 9  | 3  | 9  | 1  | 9  | 3  | 9  | 59.4 | 30.156 | 0      | 48.036  | 745430000 | 2147300   | 1.98E+08  | 1486700   | 5.3E+08   | 6951600  | 29372000 | 10800000 | 12704000 |          |          |
| Q9P010        | Q9P010 | NADH dehydrogenase [ubiquinone] 1 alpha subc            | NDUF1A3 | sj Q9P010 | 5  | 5  | 5  | 1 | 5  | 3  | 5  | 1  | 5  | 3  | 5  | 1  | 5  | 3  | 5  | 43.1 | 16.698 | 0      | 18.044  | 745000000 | 5321500   | 2.14E+08  | 11344000  | 1.19E+08  | 830010   | 20212000 | 4128300  | 21113000 |          |          |
| Q9NX40        | Q9NX40 | O6IA domain-containing protein 1                        | O6IA1   | sj Q9NX40 | 6  | 6  | 6  | 0 | 6  | 1  | 5  | 0  | 6  | 1  | 5  | 0  | 6  | 1  | 5  | 24.1 | 27.626 | 0      | 19.479  | 744330000 | 0         | 2.06E+08  | 1524400   | 3.37E+08  | 0        | 14739000 | 1509600  | 25013000 |          |          |
| Q13526;Q13526 | Q13526 | Peptidyl-prolyl cis-trans isomerase NIMA-interact       | PIN1    | sj Q13526 | 6  | 6  | 6  | 5 | 1  | 4  | 5  | 0  | 6  | 1  | 4  | 5  | 0  | 6  | 1  | 4    | 42.3   | 18.243 | 0       | 34.207    | 744220000 | 2.19E+08  | 3.1E+08   | 212530    | 2.14E+08 | 1.23E+08 | 98351000 | 3128900  | 29243000 |          |
| Q9ULE6        | Q9ULE6 | Paladin                                                 | PALD1   | sj Q9ULE6 | 5  | 5  | 5  | 5 | 2  | 1  | 1  | 5  | 2  | 1  | 1  | 5  | 2  | 1  | 1  | 8.4  | 96.753 | 0      | 31.627  | 742540000 | 2.26E+08  | 1.37E+08  | 4144100   | 3.75E+08  | 2.41E+08 | 7027000  | 2528300  | 5959300  |          |          |
| P20645        | P20645 | Cation-dependent mannose-6-phosphate recepto            | M6PR    | sj P20645 | 4  | 4  | 4  | 0 | 4  | 0  | 4  | 0  | 4  | 0  | 4  | 0  | 4  | 0  | 4  | 22   | 30.993 | 0      | 12.612  | 742080000 | 0         | 1.7E+08   | 0         | 0         | 0        | 15952000 | 0        | 22573000 |          |          |
| Q13907        | Q13907 | Isopectinyl-diphosphate Delta-isomerase 1               | ID1     | sj Q13907 | 7  | 7  | 7  | 1 | 7  | 0  | 7  | 1  | 7  | 0  | 7  | 1  | 7  | 0  | 7  | 36.6 | 26.319 | 0      | 49.274  | 741040000 | 0         | 5.18E+08  | 291300    | 2.22E+08  | 0        | 52218000 | 375570   | 2465900  |          |          |
| O60256        | O60256 | Phosphoribosyl pyrophosphate synthase-associ            | PPRSP2  | sj O60256 | 10 | 9  | 9  | 0 | 9  | 3  | 10 | 0  | 8  | 2  | 9  | 0  | 8  | 2  | 9  | 0    | 40.925 | 0      | 49.504  | 739940000 | 0         | 2.92E+08  | 2142100   | 4.45E+08  | 0        | 14058000 | 450100   | 26700000 |          |          |
| Q13423        | Q13423 | NAD(P) transhydrogenase, mitochondrial                  | NNT     | sj Q13423 | 13 | 13 | 11 | 1 | 13 | 1  | 8  | 1  | 13 | 1  | 8  | 1  | 13 | 1  | 13 | 1    | 17.5   | 113.89 | 1053100 | 44.971    | 739320000 | 1053100   | 4.19E+08  | 165590    | 3.15E+08 | 1862700  | 20713000 | 0        | 6174800  |          |
| Q9N9F9        | Q9N9F9 | DNA polymerase epsilon subunit 3                        | POLE3   | sj Q9N9F9 | 5  | 5  | 5  | 0 | 4  | 2  | 5  | 0  | 4  | 2  | 5  | 0  | 4  | 2  | 5  | 36.7 | 16.859 | 0      | 41.073  | 739170000 | 0         | 3.33E+08  | 4889500   | 4.01E+08  | 0        | 34705000 | 3143500  | 11296000 |          |          |
| P49643        | P49643 | DNA primase large subunit                               | PRIM2   | sj P49643 | 11 | 11 | 11 | 0 | 9  | 10 | 0  | 10 | 0  | 9  | 10 | 0  | 9  | 10 | 0  | 10   | 27.1   | 58.805 | 0       | 23.098    | 739000000 | 0         | 0.327E+08 | 0         | 0        | 0        | 30091000 | 0        | 15659000 |          |
| O43598        | O43598 | 2-deoxyuracil-5-phosphate N-hydrolase 1                 | DNP1    | sj O43598 | 5  | 5  | 5  | 0 | 5  | 1  | 2  | 0  | 5  | 1  | 2  | 0  | 5  | 1  | 2  | 55.2 | 19.108 | 0      | 46.069  | 736260000 | 0         | 6.84E+08  | 1537500   | 4759000   | 0        | 61573000 | 2105400  | 1983700  |          |          |
| Q9UN86        | Q9UN86 | Ras GTPase-activating protein-binding protein 2         | G3BP2   | sj Q9UN86 | 9  | 9  | 9  | 7 | 3  | 6  | 7  | 8  | 2  | 5  | 6  | 7  | 2  | 5  | 6  | 7    | 23.9   | 54.12  | 0       | 41.063    | 735880000 | 19051000  | 87880000  | 159210000 | 4.7E+08  | 65833000 | 10117000 | 60590800 | 10293000 |          |
| Q16537;Q16537 | Q16537 | Serine/threonine-protein phosphatase 2A 56 kDa          | PPP2R5E | sj Q16537 | 10 | 10 | 10 | 0 | 4  | 2  | 10 | 0  | 4  | 2  | 10 | 0  | 4  | 2  | 10 | 0    | 7      | 24.8   | 54.699  | 0         | 33.127    | 735650000 | 0         | 27780000  | 7310400  | 7.01E+08 | 0        | 3783000  | 9809800  | 22580000 |
| O94874        | O94874 | E3 UFM1-protein ligase 1                                | UFL1    | sj O94874 | 14 | 14 | 14 | 0 | 8  | 9  | 13 | 0  | 8  | 9  | 13 | 0  | 8  | 9  | 13 | 23.3 | 89.594 | 0      | 79.115  | 733860000 | 0         | 1.14E+08  | 18721000  | 6.02E+08  | 0        | 11684000 | 17458000 | 18187000 |          |          |
| P17301        | P17301 | Integrin alpha-2                                        | ITGA2   | sj P17301 | 16 | 16 | 16 | 0 | 1  | 16 | 0  | 5  | 1  | 16 | 0  | 5  | 1  | 16 | 0  | 21.2 | 129.29 | 0      | 66.891  | 730190000 | 0         | 17822000  | 1708200   | 7.11E+08  | 0        | 1332700  | 894610   | 29693000 |          |          |
| P35250        | P35250 | Replication factor C subunit 2                          | RFC2    | sj P35250 | 11 | 11 | 11 | 0 | 11 | 6  | 8  | 0  | 11 | 6  | 8  | 0  | 11 | 6  | 8  | 45.2 | 39.157 | 0      | 106.29  | 729740000 | 0         | 3.06E+08  | 17948000  | 4.06E+08  | 0        | 21343000 | 19222000 | 15153000 |          |          |
| Q9Y333        | Q9Y333 | U6 snRNA-associated Sm-like protein Lsm2                | LSM2    | sj Q9Y333 | 3  | 3  | 3  | 0 | 3  | 0  | 2  | 0  | 3  | 0  | 2  | 0  | 3  | 0  | 2  | 48.4 | 10.834 | 0      | 13.06   | 729540000 | 0         | 3.6E+08   | 0         | 3.69E+08  | 0        | 30082000 | 0        | 16870000 |          |          |
| Q29RF7        | Q29RF7 | Sister chromatid cohesion protein PD55 homolog          | PD55A   | sj Q29RF7 | 21 | 21 | 20 | 0 | 17 | 4  | 20 | 0  | 17 | 4  | 20 | 0  | 16 | 4  | 19 | 22.4 | 150.83 | 0      | 68.86   | 729270000 | 0         | 2.31E+08  | 10259000  | 4.88E+08  | 0        | 17943000 | 6076800  | 23318000 |          |          |
| Q53E06        | Q53E06 | Glycerol-3-phosphate acyltransferase 3                  | AGPAT9  | sj Q53E06 | 12 | 12 | 12 | 0 | 7  | 12 | 0  | 0  | 7  | 12 | 0  | 0  | 7  | 12 | 0  | 26.7 | 48.705 | 0      | 65.893  | 729180000 | 0         | 0         | 28113000  | 7.01E+08  | 0        | 0        | 0        | 27268000 | 20456000 |          |
| Q81258        | Q81258 | Polyribonucleotide nucleotidyltransferase 1, mito       | PNP1T   | sj Q81258 | 17 | 17 | 16 | 0 | 15 | 13 | 0  | 15 | 5  | 13 | 0  | 15 | 5  | 13 | 0  | 12   | 26.7   | 85.05  | 0       | 63.932    | 728700000 | 0         | 3.45E+08  | 1778900   | 3.76E+08 | 0        | 32792000 | 42211000 | 12709000 |          |
| Q8N135        | Q8N135 | Inad-like protein                                       | INADL   | sj Q8N135 | 1  | 1  | 1  | 0 | 1  | 1  | 0  | 1  | 1  | 0  | 1  | 1  | 0  | 1  | 1  | 0    | 7      | 196.37 | 0.00453 | 1.8274    | 726730000 | 0         | 5.89E+08  | 7791800   | 1.26E+08 | 0        | 50696000 | 6691500  | 5213500  |          |
| P61956;Q61956 | P61956 | Small ubiquitin-related modifier 2                      | SUMO2   | sj P61956 | 3  | 3  | 3  | 0 | 3  | 1  | 3  | 0  | 3  | 1  | 3  | 0  | 3  | 1  | 3  | 0    | 27.4   | 10.871 | 0       | 15.332    | 726360000 | 7985200   | 4.51E+08  | 0         | 3.7E+08  | 9121800  | 38159000 | 0        | 11478000 |          |
| Q9HA77        | Q9HA77 | Proteasome cysteine- $\alpha$ RNA ligase, mitochondrial | CARS2   | sj Q9HA77 | 7  | 7  | 7  | 1 | 5  | 1  | 6  | 1  | 5  | 1  | 6  | 1  | 5  | 1  | 6  | 18.8 | 62.223 | 0      | 23.958  | 726290000 | 310260    | 1.45E+08  | 5478300   | 5.76E+08  | 938780   | 3808600  | 3233800  | 33169000 |          |          |
| Q99426        | Q99426 | Tubulin-folding cofactor B                              | TBCB    | sj Q99426 | 6  | 6  | 6  | 0 | 6  | 0  | 6  | 0  | 6  | 0  | 6  | 0  | 6  | 0  | 6  | 0    | 32.8   | 27.325 | 0       | 21.803    | 724240000 | 0         | 1.94E+08  | 0         | 5.3E+08  | 0        | 16680000 | 0        | 22238000 |          |
| Q8W190        | Q8W190 | Zinc finger CCH domain-containing protein 15            | ZC3H15  | sj Q8W190 | 8  | 8  | 8  | 2 | 7  | 8  | 2  | 7  | 8  | 2  | 7  | 8  | 2  | 7  | 8  | 26.3 | 48.602 | 0      | 40.68   | 723550000 | 15500000  | 1.97E+08  | 25842000  | 4.85E+08  | 19779000 | 14318000 | 19643000 | 16555000 |          |          |
| Q10471;Q10471 | Q10471 | Polypeptide N-acetylglucosaminyltransferase 2           | GALNT2  | sj Q10471 | 11 | 11 | 11 | 0 | 8  | 6  | 11 | 0  | 8  | 6  | 11 | 0  | 8  | 6  | 11 | 0    | 24     | 64.732 | 0       | 44.032    | 722040000 | 301310    | 72592000  | 10605900  | 6.32E+08 | 8540000  | 10366000 | 8085800  | 16542000 |          |
| P49593        | P49593 | Protein phosphatase 1F                                  | PPM1F   | sj P49593 | 11 | 11 | 11 | 0 | 8  | 1  | 9  | 0  | 8  | 1  | 9  | 0  | 8  | 1  | 9  | 0    | 42.5   | 49.83  | 0       | 45.833    | 721680000 | 0         | 1.79E+08  | 1526900   | 5.43E+08 | 0        | 26048000 | 3089900  | 9872300  |          |
| P24941;Q61949 | P24941 | Cyclin-dependent kinase 2                               | CDK2    | sj P24941 | 7  | 7  | 7  | 0 | 8  | 3  | 7  | 0  | 8  | 3  | 7  | 0  | 8  | 3  | 7  | 0    | 38.9   | 33.929 | 0       | 35.693    | 720310000 | 0         | 4.51E+08  | 4203500   | 2.65E+08 | 0        | 38032000 | 6445800  | 8751200  |          |
| Q9BV86        | Q9BV86 | N-terminal Xaa-Pro-Lys-N-methyltransferase 1;N-1        | NTMT1   | sj Q9BV86 | 9  | 9  | 9  | 0 | 6  | 0  | 9  | 0  | 6  | 0  | 9  | 0  | 6  | 0  | 9  | 0    | 6      | 53.8   | 25.387  | 0         | 27.884    | 719410000 | 0         | 4.74E+08  | 0        | 2.46E+08 | 0        | 38310000 | 0        | 13425000 |
| P61077        | P61077 | Ubiquitin-conjugating enzyme E2 D3                      | UBE2D3  | sj P61077 | 3  | 3  | 3  | 1 | 0  | 2  | 1  | 0  | 2  | 1  | 0  | 2  | 1  | 0  | 2  | 1    | 24.5   | 16.687 | 0       | 4.896     | 719010000 | 0         | 2.36E+08  | 2039300   | 4.81E+08 | 0        | 21698000 | 15694000 | 18689000 |          |
| Q08AM6        | Q08AM6 | Protein VAC1A homolog                                   | VAC1A   | sj Q08AM6 | 14 | 14 | 14 | 1 | 9  | 10 | 13 | 1  | 9  | 10 | 13 | 1  | 9  | 10 | 13 | 22.5 | 87.972 | 0      | 45.192  | 716810000 | 3999900   | 82855000  | 40330000  | 5.87E+08  | 0        | 9950500  | 28390000 | 22191000 |          |          |
| Q9H357        | Q9H357 | Tyrosine-protein phosphatase non-receptor type          | PTPN23  | sj Q9H357 | 19 | 19 | 19 | 0 | 13 | 1  | 19 | 0  | 13 | 1  | 19 | 0  | 13 | 1  | 19 | 21.1 | 178.97 | 0      | 70.753  | 715300000 | 0         | 97580000  | 1371200   | 1.61E+08  | 0        | 9862100  | 1250900  | 23758000 |          |          |
| Q96H51        | Q96H51 | Serine/threonine-protein phosphatase PGAM5, n           | PGAM5   | sj Q96H51 | 19 | 19 | 19 | 0 | 13 | 8  | 8  | 0  | 13 | 8  | 8  | 0  | 13 | 8  | 8  | 54   | 32.004 | 0      | 32.463  | 714960000 | 1.44E+08  | 3.64E+08  | 3612000   | 1.71E+08  | 1.37E+08 | 39120000 | 27103000 | 10864000 |          |          |
| Q52L10        | Q52L10 | Protein FAM98B                                          | FAM98B  | sj Q52L10 | 10 | 10 | 10 | 0 | 7  | 1  | 8  | 4  | 8  | 1  | 0  | 2  | 6  | 2  | 6  | 33.5 | 45.547 | 0      | 73.831  | 714250000 | 957690    | 2.17E+08  | 21426000  | 4.75E+08  | 2709600  | 29047000 | 11268000 | 10982000 |          |          |
| Q9NZ08        | Q9NZ08 | Endoplasmic reticulum aminopeptidase 1                  | ERAP1   | sj Q9NZ08 | 10 | 10 | 10 | 0 | 10 | 1  | 0  | 10 | 0  | 10 | 1  | 0  | 10 | 0  | 10 | 14.3 | 107.23 | 0      | 33.581  | 710780000 | 162960    | 0         | 0         | 0         | 7.11E+08 | 0        | 29224000 | 0        | 0        |          |
| Q9UNL2        | Q9UNL2 | Translocin-associated protein subunit gamma             | SSR3    | sj Q9UNL2 | 1  | 1  | 1  | 0 | 1  | 1  | 0  | 1  | 1  | 0  | 1  | 1  | 0  | 1  | 1  | 7.6  | 21.08  | 0      | 44.648  | 710150000 | 0         | 2.42E+08  | 28110000  | 4.4E+08   | 0        | 17602000 | 15257000 | 14930000 |          |          |
| Q99439        | Q99439 | Calponin-2                                              | CNN2    | sj Q99439 | 4  | 4  | 4  | 0 | 3  | 1  | 5  | 0  | 3  | 1  | 5  | 0  | 3  | 1  | 5  | 0    | 20.4   | 33.697 | 0       | 17.458    | 708990000 | 6.72E+08  | 0         | 6067000   | 6.26E+08 | 0        | 10188000 | 8704800  | 17719000 |          |
| Q9NP74        | Q9NP74 | Palmdelphin                                             | PALMD   | sj Q9NP74 | 11 | 11 | 11 | 0 | 0  | 4  | 11 | 0  | 0  | 4  | 11 | 0  | 0  | 4  | 11 | 0    | 34.3   | 62.757 | 0       | 33.048    | 707870000 | 0         | 0         | 7584500   | 7E+08    | 0        | 7838100  | 26058000 | 0        |          |
| P08962        | P08962 | CDG3 antigen                                            | CDG3    | sj P08962 | 1  | 1  | 1  | 0 | 1  | 0  | 0  | 1  | 0  | 0  | 1  | 0  | 0  | 1  | 0  | 4.2  | 25.636 | 0      | 12.305  | 706900000 | 0         | 0         | 0         | 0         | 0        | 0        | 0        | 0        | 23414000 |          |
| Q95104        | Q95104 | Splicing factor, arginine/serine-rich 15                | SCAF4   | sj Q95104 | 8  | 8  | 8  | 0 | 8  | 2  | 8  | 0  | 8  | 2  | 8  |    |    |    |    |      |        |        |         |           |           |           |           |           |          |          |          |          |          |          |

|           |        |                                                         |         |        |    |    |    |   |    |    |    |   |    |    |    |    |    |    |    |      |        |        |        |           |           |           |          |          |           |          |           |          |          |
|-----------|--------|---------------------------------------------------------|---------|--------|----|----|----|---|----|----|----|---|----|----|----|----|----|----|----|------|--------|--------|--------|-----------|-----------|-----------|----------|----------|-----------|----------|-----------|----------|----------|
| Q53E6     | Q53E6  | Programmed cell death protein 4                         | PDCD4   | Q53E6  | 8  | 8  | 8  | 4 | 7  | 1  | 0  | 4 | 7  | 1  | 0  | 4  | 7  | 1  | 0  | 23.9 | 51.735 | 0      | 46.26  | 667700000 | 1.87E+08  | 4.79E+08  | 2130500  | 0        | 546750000 | 1.66E+08 | 9967200   | 0        |          |
| P8293     | P8293  | 28S ribosomal protein S9, mitochondrial                 | MRP59   | P8293  | 10 | 10 | 10 | 1 | 8  | 5  | 8  | 1 | 8  | 5  | 8  | 1  | 8  | 5  | 8  | 1    | 33.6   | 45.834 | 0      | 33.992    | 666900000 | 2351000   | 3.78E+08 | 31302000 | 2.55E+08  | 4139200  | 8379200   | 13188000 | 16040000 |
| Q9UHD2    | Q9UHD2 | Serine/threonine-protein kinase TBK1                    | TBK1    | Q9UHD2 | 16 | 16 | 16 | 6 | 6  | 13 | 10 | 6 | 6  | 13 | 10 | 6  | 6  | 13 | 10 | 32.1 | 82.641 | 0      | 83.512 | 664530000 | 84715000  | 48720000  | 2.18E+08 | 6        | 53        | 3294000  | 134670000 | 16055000 |          |
| Q9C636    | Q9C636 | Pyruvate-5-carboxylate reductase 2                      | PCYR2   | Q9C636 | 7  | 7  | 7  | 7 | 4  | 5  | 0  | 7 | 4  | 5  | 0  | 7  | 4  | 5  | 0  | 25.9 | 33.637 | 0      | 31.579 | 664190000 | 0         | 4.11E+08  | 6019400  | 2.48E+08 | 0         | 34025000 | 7813500   | 8582900  |          |
| O15347    | O15347 | High mobility group protein B3                          | HMG83   | O15347 | 5  | 5  | 5  | 0 | 5  | 0  | 4  | 0 | 5  | 0  | 4  | 0  | 5  | 0  | 4  | 18.5 | 22.98  | 0      | 18.311 | 664180000 | 0         | 4.47E+08  | 0        | 0        | 1.27E+08  | 0        | 8433000   |          |          |
| P12532;P1 | P12532 | Creatine kinase U-type, mitochondrial                   | CKMT1A  | P12532 | 8  | 8  | 8  | 8 | 1  | 0  | 0  | 8 | 1  | 0  | 0  | 8  | 1  | 0  | 0  | 34.1 | 47.036 | 0      | 137.64 | 663290000 | 0         | 6.61E+08  | 2337400  | 0        | 0         | 58263000 | 1570700   | 0        |          |
| O94903    | O94903 | Proline synthase co-transcribed bacterial homolog PROSC | PROSC   | O94903 | 5  | 5  | 5  | 0 | 5  | 1  | 2  | 0 | 5  | 1  | 2  | 0  | 5  | 1  | 2  | 25.5 | 30.344 | 0      | 23.676 | 662610000 | 0         | 4.68E+08  | 555120   | 1.94E+08 | 0         | 46264000 | 558560    | 2797200  |          |
| Q14CX7    | Q14CX7 | N-alpha-acetyltransferase 25, NaBt auxillary subu       | NAA25   | Q14CX7 | 13 | 13 | 13 | 0 | 10 | 0  | 10 | 0 | 10 | 0  | 10 | 0  | 10 | 0  | 10 | 14.8 | 112.29 | 0      | 36.959 | 661860000 | 0         | 1.6E+08   | 0        | 0        | 1.61E+08  | 0        | 18576000  |          |          |
| Q3ZM24    | Q3ZM24 | Leucine-rich repeat flightless-interacting protein      | LRRP13  | Q3ZM24 | 10 | 10 | 10 | 9 | 4  | 10 | 0  | 9 | 4  | 10 | 0  | 9  | 4  | 10 | 0  | 18.7 | 89.252 | 0      | 53.472 | 658900000 | 0         | 1.92E+08  | 11489000 | 4.55E+08 | 0         | 15217000 | 13453000  | 14648000 |          |
| Q14925;O  | Q14925 | Mitochondrial import inner membrane translocase         | TIMM23  | Q14925 | 7  | 7  | 7  | 7 | 3  | 7  | 0  | 7 | 3  | 7  | 0  | 7  | 3  | 7  | 0  | 61.7 | 21.943 | 0      | 71.402 | 656790000 | 0         | 2.05E+08  | 7254700  | 4.45E+08 | 0         | 16417000 | 11580000  | 13227000 |          |
| Q96920    | Q96920 | 60S ribosomal protein L36a-like                         | RLP36AL | Q96920 | 7  | 7  | 7  | 2 | 0  | 6  | 7  | 6 | 0  | 7  | 6  | 0  | 7  | 6  | 0  | 45.3 | 12.469 | 0      | 39.239 | 656190000 | 0         | 2.28E+08  | 66584000 | 3.62E+08 | 0         | 20450000 | 43820000  | 15422000 |          |
| P48449    | P48449 | Lanosterol synthase                                     | LSS     | P48449 | 12 | 12 | 12 | 0 | 11 | 0  | 11 | 0 | 11 | 0  | 11 | 0  | 11 | 0  | 11 | 22.3 | 83.308 | 0      | 37.632 | 655180000 | 0         | 2.07E+08  | 0        | 0        | 0         | 16770000 | 0         | 19970000 |          |
| P57088    | P57088 | Transmembrane protein 33                                | TMEM33  | P57088 | 4  | 4  | 4  | 4 | 3  | 4  | 0  | 4 | 3  | 4  | 0  | 4  | 3  | 4  | 0  | 16.2 | 27.978 | 0      | 22.007 | 652860000 | 0         | 1.61E+08  | 21965000 | 4.7E+08  | 0         | 12808000 | 16675000  | 18771000 |          |
| P78346    | P78346 | Ribonuclease P protein subunit p30                      | RPP30   | P78346 | 8  | 8  | 8  | 0 | 7  | 4  | 8  | 0 | 7  | 4  | 8  | 0  | 7  | 4  | 8  | 39.9 | 29.321 | 0      | 30.694 | 652530000 | 0         | 2.19E+08  | 5425900  | 4.29E+08 | 0         | 20812000 | 9563400   | 10161000 |          |
| Q92665    | Q92665 | 28S ribosomal protein S31, mitochondrial                | MRP531  | Q92665 | 9  | 9  | 9  | 9 | 9  | 6  | 7  | 1 | 9  | 6  | 7  | 1  | 9  | 6  | 7  | 37.5 | 45.318 | 0      | 44.725 | 651400000 | 1306900   | 4.19E+08  | 13257000 | 2.18E+08 | 2145600   | 35311000 | 10826000  | 7808800  |          |
| Q55515    | Q55515 | Heterochromatin protein 3                               | HP18P3  | Q55515 | 12 | 12 | 12 | 1 | 6  | 9  | 10 | 1 | 6  | 9  | 10 | 1  | 6  | 9  | 10 | 27.7 | 61.206 | 0      | 30.279 | 651250000 | 272740    | 30223000  | 75855000 | 5.45E+08 | 1147900   | 1718400  | 42260000  | 31194000 |          |
| Q00577    | Q00577 | Transcriptional activator protein Pur-alpha             | PURA    | Q00577 | 6  | 6  | 6  | 0 | 5  | 4  | 4  | 0 | 5  | 4  | 4  | 0  | 5  | 4  | 4  | 32.3 | 34.91  | 0      | 93.412 | 650860000 | 0         | 2.68E+08  | 86672000 | 2.97E+08 | 0         | 18936000 | 63656000  | 11437000 |          |
| P62993    | P62993 | Growth factor receptor-bound protein 2                  | GRB2    | P62993 | 7  | 7  | 7  | 7 | 3  | 7  | 0  | 7 | 3  | 7  | 0  | 7  | 3  | 7  | 0  | 41.9 | 25.206 | 0      | 25.15  | 649820000 | 0         | 2.55E+08  | 0        | 5314400  | 3.9E+08   | 0        | 22939000  | 5206900  | 13911000 |
| Q92879    | Q92879 | CUGBP Elav-like family member 1                         | CELF1   | Q92879 | 9  | 9  | 9  | 7 | 2  | 7  | 0  | 7 | 2  | 7  | 0  | 7  | 2  | 7  | 0  | 27.8 | 52.063 | 0      | 39.834 | 649190000 | 0         | 2.33E+08  | 5095000  | 4.11E+08 | 0         | 11679000 | 15271000  | 26891000 |          |
| Q9H5K3    | Q9H5K3 | Protein O-mannose kinase                                | POMK    | Q9H5K3 | 2  | 2  | 2  | 0 | 2  | 0  | 2  | 0 | 2  | 0  | 2  | 0  | 2  | 0  | 2  | 7.4  | 40.05  | 0      | 7.056  | 649040000 | 0         | 4.8807000 | 0        | 6E+08    | 0         | 5791400  | 0         | 23196000 |          |
| Q658P3    | Q658P3 | Metalloendolectin STEAP3                                | STEAP3  | Q658P3 | 4  | 4  | 4  | 0 | 3  | 2  | 4  | 0 | 3  | 2  | 4  | 0  | 3  | 2  | 4  | 13.7 | 54.6   | 0      | 14.243 | 647670000 | 0         | 18331000  | 16952000 | 6.12E+08 | 0         | 2371500  | 19644000  | 16177000 |          |
| P55039    | P55039 | Developmentally-regulated GTP-binding protein 2         | DRG2    | P55039 | 7  | 7  | 7  | 2 | 4  | 0  | 7  | 2 | 4  | 0  | 7  | 2  | 4  | 0  | 7  | 25.3 | 40.746 | 0      | 20.49  | 647350000 | 10804000  | 1.15E+08  | 0        | 0        | 5.22E+08  | 17038000 | 13001500  | 0        |          |
| Q08752    | Q08752 | Peptidyl-prolyl cis-trans isomerase D                   | PP1D    | Q08752 | 11 | 11 | 11 | 0 | 10 | 0  | 11 | 0 | 10 | 0  | 11 | 0  | 10 | 0  | 11 | 38.1 | 40.763 | 0      | 40.586 | 645220000 | 0         | 2.65E+08  | 0        | 0        | 0         | 23345000 | 0         | 15511000 |          |
| Q96A35    | Q96A35 | 39S ribosomal protein L24, mitochondrial                | MRPL24  | Q96A35 | 3  | 3  | 3  | 0 | 3  | 3  | 0  | 3 | 3  | 0  | 3  | 3  | 0  | 3  | 3  | 23.1 | 24.915 | 0      | 10.724 | 644630000 | 0         | 1.79E+08  | 25672000 | 4.4E+08  | 0         | 14340000 | 20238000  | 16576000 |          |
| P13807;P5 | P13807 | Glycogen (starch) synthase, muscle                      | GSY1    | P13807 | 11 | 11 | 11 | 0 | 10 | 2  | 8  | 0 | 10 | 2  | 8  | 0  | 10 | 2  | 8  | 22.1 | 83.785 | 0      | 24.062 | 644430000 | 0         | 2.71E+08  | 4042900  | 3.7E+08  | 0         | 30527000 | 3018600   | 8245300  |          |
| Q9HCO0    | Q9HCO0 | Methylcrotonoyl-CoA carboxylase beta chain, mit         | MCC2C   | Q9HCO0 | 10 | 10 | 10 | 1 | 10 | 4  | 9  | 1 | 10 | 4  | 9  | 1  | 10 | 4  | 9  | 27.4 | 61.332 | 0      | 36.06  | 644180000 | 487540    | 3.3E+08   | 4437900  | 3.09E+08 | 931500    | 34117000 | 3067600   | 6648600  |          |
| Q95A73    | Q95A73 | Peptidyl-prolyl cis-trans isomerase FKBP10              | FKBP10  | Q95A73 | 10 | 10 | 10 | 0 | 6  | 2  | 10 | 0 | 6  | 2  | 10 | 0  | 6  | 2  | 10 | 17.4 | 64.244 | 0      | 25.811 | 641940000 | 0         | 2.8602000 | 1900700  | 6.11E+08 | 0         | 2553600  | 768490    | 25622000 |          |
| P35222    | P35222 | Catenin beta-1                                          | CTNNB1  | P35222 | 13 | 13 | 13 | 0 | 11 | 3  | 13 | 0 | 11 | 3  | 13 | 0  | 11 | 3  | 13 | 24.2 | 85.496 | 0      | 75.795 | 640890000 | 0         | 2.2E+08   | 13942000 | 4.07E+08 | 0         | 17337000 | 13876000  | 14168000 |          |
| P46977    | P46977 | Dolichyl-diphosphooligosaccharide--protein gly          | TT3A    | P46977 | 8  | 7  | 7  | 0 | 8  | 6  | 7  | 0 | 7  | 5  | 6  | 7  | 0  | 7  | 5  | 6    | 11.5   | 80.529 | 0      | 28.413    | 640840000 | 0         | 2.46E+08 | 20102000 | 3.74E+08  | 0        | 17952000  | 15822000 | 16849000 |
| Q97200    | Q97200 | Sigma non-opioid intracellular receptor 1               | SIGMAR1 | Q97200 | 4  | 4  | 4  | 0 | 4  | 2  | 4  | 0 | 4  | 2  | 4  | 0  | 4  | 2  | 4  | 29.6 | 25.127 | 0      | 47.83  | 636840000 | 0         | 2.64E+08  | 2330900  | 3.71E+08 | 0         | 20493000 | 5188900   | 14387000 |          |
| Q9Y2V2    | Q9Y2V2 | Calcium-regulated heat stable protein 1                 | CARHSP1 | Q9Y2V2 | 5  | 5  | 5  | 0 | 4  | 1  | 5  | 0 | 4  | 1  | 5  | 0  | 4  | 1  | 5  | 64.6 | 15.892 | 0      | 38.749 | 636030000 | 0         | 1.33E+08  | 1544300  | 5.01E+08 | 0         | 12091000 | 1249900   | 20065000 |          |
| P28340    | P28340 | DNA polymerase delta catalytic subunit                  | POLD1   | P28340 | 15 | 15 | 15 | 0 | 10 | 3  | 12 | 0 | 10 | 3  | 12 | 0  | 10 | 3  | 12 | 21.3 | 123.63 | 0      | 60.881 | 635050000 | 0         | 2.37E+08  | 5877100  | 3.92E+08 | 0         | 20666000 | 2290800   | 18019000 |          |
| P23193;Q1 | P23193 | Transcription elongation factor A protein 1             | TCEA1   | P23193 | 13 | 13 | 13 | 0 | 13 | 1  | 12 | 0 | 13 | 1  | 12 | 0  | 13 | 1  | 12 | 49.2 | 33.969 | 0      | 44.454 | 634660000 | 0         | 2.35E+08  | 10357000 | 3.89E+08 | 0         | 10790000 | 11629000  | 14982000 |          |
| Q15020    | Q15020 | Squamous cell carcinoma antigen recognized by T         | SART3   | Q15020 | 12 | 12 | 12 | 0 | 11 | 5  | 11 | 0 | 11 | 5  | 11 | 0  | 11 | 5  | 11 | 16.7 | 109.93 | 0      | 40.193 | 633770000 | 0         | 2.55E+08  | 1388700  | 3.73E+08 | 0         | 18346000 | 2862300   | 20470000 |          |
| O75962;O1 | O75962 | Triple functional domain protein                        | TRIO    | O75962 | 19 | 19 | 19 | 0 | 1  | 8  | 18 | 0 | 1  | 8  | 18 | 0  | 1  | 8  | 18 | 10.9 | 346.9  | 0      | 57.949 | 633220000 | 0         | 2.594300  | 58991000 | 6.12E+08 | 0         | 754830   | 6152400   | 31174000 |          |
| Q13596    | Q13596 | Sorting nexin-1                                         | SNX1    | Q13596 | 12 | 10 | 10 | 0 | 8  | 3  | 12 | 0 | 6  | 2  | 10 | 0  | 6  | 2  | 10 | 19.5 | 59.069 | 0      | 43.013 | 632300000 | 0         | 1.18E+08  | 4389300  | 5.1E+08  | 0         | 9831600  | 4030200   | 20444000 |          |
| P17096    | P17096 | High mobility group protein HMG-I/HMG-Y                 | HMG1    | P17096 | 5  | 5  | 5  | 1 | 4  | 4  | 5  | 1 | 4  | 4  | 5  | 1  | 4  | 4  | 5  | 38.3 | 11.676 | 0      | 21.833 | 631800000 | 749730    | 73558000  | 38399000 | 5.19E+08 | 1287500   | 8652300  | 30851000  | 13590000 |          |
| Q6NYC1    | Q6NYC1 | Bifunctional arginine demethylase and lysyl-hydr        | JM1D6   | Q6NYC1 | 6  | 6  | 6  | 1 | 6  | 1  | 4  | 1 | 6  | 1  | 4  | 1  | 6  | 1  | 4  | 22.8 | 46.461 | 0      | 27.2   | 631670000 | 1125200   | 2.62E+08  | 6915600  | 3.61E+08 | 0         | 20679000 | 8609600   | 13339000 |          |
| P30519    | P30519 | Heme oxygenase 2                                        | HMOX2   | P30519 | 8  | 8  | 8  | 0 | 7  | 0  | 5  | 0 | 7  | 0  | 5  | 0  | 7  | 0  | 5  | 41.7 | 36.032 | 0      | 51.647 | 631530000 | 0         | 4.52E+08  | 0        | 0        | 0         | 36892000 | 0         | 10339000 |          |
| Q07157    | Q07157 | Tight junction protein ZO-1                             | TJP1    | Q07157 | 26 | 26 | 26 | 1 | 10 | 25 | 20 | 1 | 10 | 25 | 20 | 1  | 10 | 25 | 20 | 22.5 | 195.46 | 0      | 69.417 | 631030000 | 810120    | 57144000  | 23047000 | 2.43E+08 | 1094900   | 5204500  | 16139000  | 7120000  |          |
| Q9NX63    | Q9NX63 | MICOS complex subunit MIC19                             | CHCHD3  | Q9NX63 | 7  | 7  | 7  | 0 | 4  | 6  | 0  | 4 | 6  | 0  | 4  | 6  | 0  | 4  | 6  | 23.7 | 26.152 | 0      | 27.419 | 630570000 | 0         | 3.57E+08  | 1664300  | 2.59E+08 | 0         | 29983000 | 11700000  | 10290000 |          |
| Q9BV36    | Q9BV36 | Melanophilin                                            | MLPH    | Q9BV36 | 13 | 13 | 13 | 0 | 6  | 13 | 0  | 6 | 13 | 0  | 6  | 13 | 0  | 6  | 13 | 33.8 | 65.948 | 0      | 80.823 | 629360000 | 0         | 0         | 32602000 | 5.97E+08 | 0         | 24708000 | 21742000  | 0        |          |
| Q00393    | Q00393 | Small acid protein                                      | SMAP    | Q00393 | 5  | 5  | 5  | 0 | 5  | 1  | 5  | 0 | 5  | 1  | 5  | 0  | 5  | 1  | 5  | 30.1 | 20.332 | 0      | 56.838 | 6291300   |           |           |          |          |           |          |           |          |          |

|               |        |                                                         |          |           |    |    |    |    |    |    |    |    |    |    |    |      |        |        |        |           |           |           |           |           |           |           |           |          |          |          |          |          |          |
|---------------|--------|---------------------------------------------------------|----------|-----------|----|----|----|----|----|----|----|----|----|----|----|------|--------|--------|--------|-----------|-----------|-----------|-----------|-----------|-----------|-----------|-----------|----------|----------|----------|----------|----------|----------|
| P49589        | P49589 | Cysteine-tRNA ligase, cytoplasmic                       | CARS     | sp P49589 | 11 | 11 | 11 | 1  | 9  | 2  | 10 | 1  | 9  | 2  | 10 | 16.8 | 85.472 | 0      | 60.933 | 598850000 | 1745300   | 1.8E+08   | 3255600   | 4.14E+08  | 2714100   | 11146000  | 3705400   | 19269000 |          |          |          |          |          |
| Q9NYL9;Q9NYL9 | Q9NYL9 | Tropomodulin-3                                          | TMOD3    | sp Q9NYL9 | 9  | 9  | 9  | 0  | 8  | 9  | 6  | 0  | 8  | 9  | 6  | 0    | 36.6   | 39.594 | 0      | 42.829    | 598610000 | 0         | 1.74E+08  | 83401000  | 3.42E+08  | 0         | 15982000  | 53602000 | 15811000 |          |          |          |          |
| Q15382        | Q15382 | GTP-binding protein Rheb                                | RHEB     | sp Q15382 | 7  | 7  | 7  | 0  | 5  | 1  | 7  | 0  | 5  | 1  | 7  | 29.3 | 20.497 | 0      | 13.695 | 597380000 | 0         | 28004000  | 862920    | 6.9E+08   | 0         | 1615400   | 59179000  | 24197000 |          |          |          |          |          |
| Q99805        | Q99805 | Transmembrane 9 superfamily member 2                    | TM9SF2   | sp Q99805 | 7  | 7  | 7  | 0  | 7  | 4  | 7  | 0  | 7  | 4  | 7  | 0    | 11.2   | 75.775 | 0      | 30.074    | 596700000 | 0         | 1.14E+08  | 13716000  | 6.09E+08  | 0         | 9961400   | 90466000 | 18613000 |          |          |          |          |
| Q9H446        | Q9H446 | Golgi phosphatase 3                                     | GOLPH3   | sp Q9H446 | 4  | 4  | 4  | 0  | 4  | 0  | 4  | 0  | 4  | 0  | 4  | 0    | 3      | 24.2   | 33.81  | 0         | 24.621    | 595150000 | 0         | 2.62E+08  | 0         | 4.61E+08  | 0         | 9066600  | 0        | 19859000 |          |          |          |
| P54105        | P54105 | Methylosome subunit p1Cn                                | CLNS1A   | sp P54105 | 5  | 5  | 5  | 0  | 4  | 0  | 4  | 0  | 4  | 0  | 4  | 0    | 4      | 43.5   | 26.215 | 0         | 49.942    | 594880000 | 0         | 3.83E+08  | 0         | 0.12E+08  | 0         | 36236000 | 0        | 6234000  |          |          |          |
| Q15005        | Q15005 | Signal peptidase complex subunit 2                      | SPCS2    | sp Q15005 | 7  | 7  | 7  | 0  | 7  | 0  | 7  | 0  | 7  | 0  | 7  | 0    | 6      | 39.8   | 25.003 | 0         | 48.611    | 593310000 | 0         | 2.28E+08  | 0         | 0.36E+08  | 0         | 20849000 | 0        | 14258000 |          |          |          |
| O00767        | O00767 | Acy-CoA desaturase                                      | SCD      | sp O00767 | 4  | 4  | 4  | 0  | 2  | 2  | 2  | 0  | 2  | 2  | 2  | 0    | 4      | 22.6   | 41.522 | 0         | 12.294    | 593100000 | 0         | 28356000  | 12723000  | 0         | 3844700   | 15062000 | 14845000 |          |          |          |          |
| Q9Y413        | Q9Y413 | Unconventional myosin-Va                                | MYO5A    | sp Q9Y413 | 19 | 19 | 19 | 2  | 6  | 3  | 19 | 2  | 6  | 3  | 19 | 2    | 6      | 3      | 19     | 13        | 215.4     | 0         | 70.396    | 592000000 | 64518000  | 13509000  | 6158300   | 5.08E+08 | 41359000 | 8695100  | 10475000 | 30202000 |          |
| Q60783        | Q60783 | 28S ribosomal protein S24, mitochondrial                | MRPS14   | sp Q60783 | 2  | 2  | 2  | 1  | 2  | 2  | 2  | 1  | 2  | 2  | 2  | 1    | 2      | 2      | 2      | 2         | 19        | 15.139    | 0         | 13.894    | 591500000 | 1329600   | 48630000  | 49744000 | 44136000 | 28828000 | 24390000 | 28864000 | 3142300  |
| Q9N406        | Q9N406 | SPAT3-like protein                                      | SPAT3L   | sp Q9N406 | 11 | 11 | 11 | 0  | 4  | 8  | 11 | 0  | 4  | 8  | 11 | 0    | 4      | 8      | 11     | 26.7      | 61.728    | 0         | 32.547    | 591200000 | 0         | 9482200   | 97838000  | 4.84E+08 | 0        | 623860   | 58271000 | 27597000 |          |
| Q15165        | Q15165 | Serum paraoxonase/arylesterase 2                        | PON2     | sp Q15165 | 7  | 7  | 7  | 0  | 1  | 0  | 7  | 0  | 1  | 0  | 7  | 0    | 7      | 40.1   | 39.38  | 0         | 50.672    | 590890000 | 0         | 10963000  | 0         | 5.8E+08   | 0         | 99700    | 0        | 20881000 |          |          |          |
| P27000        | P27000 | Lamin-B1                                                | LMNB1    | sp P27000 | 17 | 17 | 17 | 2  | 15 | 3  | 9  | 2  | 15 | 3  | 9  | 2    | 14     | 2      | 8      | 40.3      | 66.408    | 0         | 80.014    | 590050000 | 1719900   | 4.31E+08  | 7156800   | 1.5E+08  | 968620   | 4322800  | 2599600  | 3901300  |          |
| Q9Y323        | Q9Y323 | Deoxynucleoside triphosphate triphosphohydrolase SAMHD1 | SAMHD1   | sp Q9Y323 | 16 | 16 | 16 | 1  | 16 | 1  | 9  | 1  | 16 | 1  | 9  | 1    | 16     | 1      | 9      | 35.3      | 72.2      | 0         | 44.122    | 589020000 | 2219100   | 3.54E+08  | 674520    | 2.33E+08 | 0        | 36271000 | 0        | 40095000 |          |
| Q14789        | Q14789 | Golgin subfamily B member 1                             | GOLGB1   | sp Q14789 | 22 | 22 | 22 | 1  | 18 | 4  | 16 | 1  | 18 | 4  | 16 | 1    | 18     | 4      | 16     | 11.3      | 376.01    | 0         | 62.755    | 588940000 | 8762900   | 2.16E+08  | 5023100   | 3.6E+08  | 0        | 16481000 | 5296800  | 15368000 |          |
| P35573        | P35573 | Glycogen debranching enzyme;4-alpha-glucanotransferase  | AGL      | sp P35573 | 11 | 11 | 11 | 0  | 11 | 0  | 11 | 0  | 11 | 0  | 11 | 0    | 11     | 0      | 11     | 9.9       | 174.76    | 0         | 49.61     | 588330000 | 0         | 2.26E+08  | 0         | 1.03E+08 | 0        | 20138000 | 0        | 14674000 |          |
| P09669        | P09669 | Cytochrome c oxidase subunit 6C                         | COX6C    | sp P09669 | 5  | 5  | 5  | 0  | 5  | 5  | 5  | 0  | 5  | 5  | 5  | 0    | 5      | 5      | 37.3   | 8.713     | 0         | 11.347    | 588050000 | 0         | 3.19E+08  | 11541000  | 2.57E+08  | 0        | 27817000 | 7606400  | 11092000 |          |          |
| P31937        | P31937 | 3-hydroxyisobutyrate dehydrogenase, mitochondrion       | HIBADH   | sp P31937 | 9  | 9  | 9  | 0  | 9  | 0  | 9  | 0  | 9  | 0  | 9  | 0    | 9      | 0      | 9      | 40.5      | 35.329    | 0         | 68.669    | 587950000 | 0         | 4.19E+08  | 0         | 1.69E+08 | 0        | 33954000 | 0        | 9930300  |          |
| P36404        | P36404 | ADP-ribosylation factor-like protein 2                  | ARL2     | sp P36404 | 6  | 6  | 6  | 0  | 6  | 2  | 6  | 0  | 6  | 2  | 6  | 0    | 6      | 2      | 6      | 40.2      | 20.878    | 0         | 32.53     | 587170000 | 0         | 2.08E+08  | 2571300   | 3.77E+08 | 0        | 18724000 | 2519500  | 14310000 |          |
| Q5TFE4        | Q5TFE4 | 5-nucleotide domain-containing protein 1                | NTSDC1   | sp Q5TFE4 | 6  | 6  | 6  | 0  | 6  | 0  | 6  | 0  | 6  | 0  | 6  | 0    | 6      | 0      | 6      | 25.005    | 586900000 | 0         | 2.86E+08  | 0         | 3.01E+08  | 0         | 19083000  | 0        | 18511000 |          |          |          |          |
| P34949        | P34949 | Mannose-6-phosphate isomerase                           | MPI      | sp P34949 | 8  | 8  | 8  | 0  | 8  | 0  | 8  | 0  | 8  | 0  | 8  | 0    | 8      | 0      | 8      | 27.7      | 46.655    | 0         | 55.642    | 586480000 | 0         | 4.97E+08  | 0         | 89234000 | 0        | 38040000 | 0        | 9461600  |          |
| P55795        | P55795 | Heterogeneous nuclear ribonucleoprotein H2              | HNRNPH2  | sp P55795 | 13 | 6  | 6  | 4  | 12 | 11 | 6  | 0  | 12 | 11 | 6  | 0    | 12     | 11     | 6      | 36.1      | 49.263    | 0         | 64.383    | 585410000 | 44467000  | 2.39E+08  | 42745000  | 2.59E+08 | 56041000 | 18779000 | 20740000 | 10245000 |          |
| Q58FF6        | Q58FF6 | Putative heat shock protein HSP 90-beta 4               | HSP90AB4 | sp Q58FF6 | 7  | 1  | 1  | 3  | 7  | 5  | 7  | 1  | 0  | 1  | 0  | 1    | 0      | 1      | 10.1   | 58.264    | 0.000246  | 3.6023    | 583960000 | 0         | 2.47E+08  | 0         | 3.37E+08  | 0        | 21730000 | 0        | 13878000 |          |          |
| O15498        | O15498 | Synaptobrevin homolog YKT6                              | YKT6     | sp O15498 | 8  | 8  | 8  | 0  | 1  | 6  | 1  | 8  | 1  | 6  | 1  | 8    | 0      | 8      | 45.5   | 22.417    | 0         | 20.735    | 583660000 | 13887000  | 2.97E+08  | 1757100   | 4.83E+08  | 1117700  | 9833200  | 1003200  | 18027000 |          |          |
| Q9Y5K6        | Q9Y5K6 | CD2-associated protein                                  | CD2AP    | sp Q9Y5K6 | 8  | 8  | 8  | 0  | 6  | 1  | 8  | 0  | 6  | 1  | 8  | 0    | 6      | 1      | 8      | 20.7      | 71.45     | 0         | 58.82     | 583460000 | 0         | 1.53E+08  | 1570800   | 4.29E+08 | 0        | 12197000 | 7955200  | 12014000 |          |
| Q95336        | Q95336 | 6-phosphogluconolactonase                               | PGLA     | sp Q95336 | 6  | 6  | 6  | 0  | 3  | 0  | 6  | 0  | 3  | 0  | 6  | 0    | 3      | 0      | 6      | 39.1      | 27.547    | 0         | 59.327    | 581600000 | 0         | 20245000  | 0         | 3.61E+08 | 0        | 3696900  | 0        | 21174000 |          |
| P05121        | P05121 | Plasminogen activator inhibitor 1                       | SERPINE1 | sp P05121 | 5  | 5  | 5  | 0  | 5  | 0  | 5  | 0  | 5  | 0  | 5  | 0    | 5      | 0      | 5      | 21.6      | 45.059    | 0         | 22.366    | 581490000 | 0         | 16791000  | 5.65E+08  | 0        | 9795500  | 24711000 | 9795500  | 0        | 21432000 |
| Q8N857;Q8N857 | Q8N857 | Protein enabled homolog                                 | ENAH     | sp Q8N857 | 13 | 13 | 13 | 0  | 13 | 0  | 13 | 0  | 13 | 0  | 13 | 0    | 13     | 0      | 13     | 31.1      | 66.509    | 0         | 60.096    | 581280000 | 0         | 2.68E+08  | 0         | 3.13E+08 | 0        | 23365000 | 0        | 12423000 |          |
| P82650        | P82650 | 28S ribosomal protein S22, mitochondrial                | MRPS22   | sp P82650 | 13 | 13 | 13 | 3  | 13 | 2  | 6  | 3  | 13 | 2  | 6  | 3    | 13     | 2      | 6      | 37.8      | 41.28     | 0         | 49.011    | 581160000 | 6514700   | 4.66E+08  | 5228600   | 1.04E+08 | 63217000 | 40040000 | 3494300  | 5138600  |          |
| Q2NL82        | Q2NL82 | Pre-rRNA processing protein TSR1 homolog                | TSR1     | sp Q2NL82 | 11 | 11 | 11 | 1  | 11 | 11 | 8  | 1  | 11 | 11 | 8  | 1    | 11     | 8      | 16.9   | 91.809    | 0         | 27.174    | 581040000 | 920240    | 3.15E+08  | 36993000  | 2.28E+08  | 2460000  | 3133000  | 14466000 | 14667000 |          |          |
| Q15428        | Q15428 | Splicing factor 3A subunit 2                            | SF3A2    | sp Q15428 | 4  | 4  | 4  | 1  | 4  | 0  | 4  | 1  | 4  | 0  | 4  | 1    | 4      | 0      | 4      | 14.9      | 49.255    | 0         | 33.774    | 579850000 | 2178900   | 3.11E+08  | 0         | 0.67E+08 | 3986400  | 27442000 | 0        | 9136300  |          |
| Q9UH86        | Q9UH86 | LIM domain and actin-binding protein 1                  | LIMA1    | sp Q9UH86 | 9  | 9  | 9  | 0  | 6  | 9  | 8  | 0  | 6  | 9  | 8  | 0    | 6      | 9      | 8      | 18.6      | 85.225    | 0         | 31.816    | 579770000 | 0         | 1.14E+08  | 150330000 | 3.15E+08 | 0        | 18165000 | 80199000 | 25699000 |          |
| P22033        | P22033 | Methylmalonyl-CoA mutase, mitochondrial                 | MUT      | sp P22033 | 12 | 12 | 12 | 1  | 10 | 2  | 6  | 1  | 10 | 2  | 6  | 1    | 10     | 2      | 6      | 21.3      | 83.134    | 0         | 30.371    | 578980000 | 1.01E+08  | 2.66E+08  | 6442400   | 2.06E+08 | 0        | 32406000 | 848120   | 29499000 |          |
| Q16539        | Q16539 | Mitogen-activated protein kinase 14                     | MAPK14   | sp Q16539 | 9  | 9  | 9  | 0  | 9  | 0  | 9  | 0  | 9  | 0  | 9  | 0    | 9      | 0      | 9      | 6         | 42.2      | 41.293    | 0         | 67.138    | 578690000 | 0         | 1.51E+08  | 0        | 4.28E+08 | 0        | 17156000 | 0        | 13726000 |
| P11498        | P11498 | Pyruvate carboxylase, mitochondrial                     | PC       | sp P11498 | 11 | 11 | 11 | 0  | 11 | 0  | 11 | 0  | 11 | 0  | 11 | 0    | 11     | 0      | 11     | 13.8      | 129.63    | 0         | 62.269    | 578430000 | 0         | 23603000  | 0         | 5.55E+08 | 0        | 5441300  | 0        | 19457000 |          |
| Q96N67;Q96N67 | Q96N67 | Dedicator of cytokinesis protein 7                      | DOCK7    | sp Q96N67 | 17 | 17 | 17 | 16 | 3  | 11 | 11 | 16 | 3  | 11 | 11 | 16   | 3      | 11     | 10     | 15        | 12.3      | 242.56    | 0         | 62.555    | 578360000 | 2113500   | 1.28E+08  | 19171000 | 4.29E+08 | 4187400  | 11655000 | 12824000 | 15245000 |
| Q3ZCM7        | Q3ZCM7 | Tubulin beta-8 chain                                    | TUBB8    | sp Q3ZCM7 | 11 | 2  | 5  | 10 | 8  | 11 | 0  | 10 | 8  | 11 | 0  | 10   | 8      | 11     | 0      | 24.5      | 49.775    | 0         | 23.998    | 578350000 | 0         | 2.3E+08   | 0         | 3.48E+08 | 0        | 21638000 | 0        | 12984000 |          |
| Q8TDN6        | Q8TDN6 | Ribosome biogenesis protein BRX1 homolog                | BRX1     | sp Q8TDN6 | 10 | 10 | 10 | 1  | 6  | 10 | 10 | 1  | 6  | 10 | 10 | 1    | 6      | 10     | 10     | 36        | 41.401    | 0         | 32.03     | 577480000 | 150230    | 56735000  | 51415000  | 4.69E+08 | 653650   | 5147500  | 47311000 | 5885700  |          |
| Q13561        | Q13561 | Dynactin subunit 2                                      | DCTN2    | sp Q13561 | 8  | 8  | 8  | 0  | 7  | 3  | 7  | 1  | 7  | 3  | 7  | 1    | 7      | 3      | 7      | 31.9      | 44.23     | 0         | 28.004    | 576820000 | 37035000  | 2.45E+08  | 8891800   | 3.19E+08 | 5229900  | 1947000  | 11368000 | 8646800  |          |
| Q10713        | Q10713 | Mitochondrial-processing peptidase subunit alpha; PMPCA | Q10713   | sp Q10713 | 13 | 13 | 13 | 1  | 13 | 1  | 10 | 1  | 13 | 1  | 10 | 1    | 13     | 1      | 10     | 26.5      | 58.252    | 0         | 40.041    | 576760000 | 415310    | 3.5E+08   | 639750    | 2.26E+08 | 0        | 27266000 | 0        | 11256000 |          |
| Q9NYL2        | Q9NYL2 | Mitogen-activated protein kinase kinase M ZAK           | Q9NYL2   | sp Q9NYL2 | 5  | 5  | 5  | 0  | 3  | 3  | 5  | 0  | 3  | 3  | 5  | 0    | 3      | 3      | 5      | 8.8       | 91.154    | 0         | 65.781    | 576330000 | 0         | 17944000  | 6382500   | 5.52E+08 | 0        | 2505400  | 4201300  | 21866000 |          |
| Q9UH65        | Q9UH65 | Switch-associated protein 70                            | SWAP70   | sp Q9UH65 | 11 | 11 | 11 | 0  | 4  | 0  | 10 | 0  | 4  | 0  | 10 | 0    | 4      | 0      | 10     | 29.4      | 68.997    | 0         | 202.38    | 575680000 | 0         | 30197000  | 0         | 3.45E+08 | 0        | 2019400  | 0        | 23076000 |          |
| Q8N3U4;Q8N3U4 | Q8N3U4 | Cohesin subunit SA-2                                    | STAG2    | sp Q8N3U4 | 8  | 8  | 8  | 0  | 1  | 8  | 0  | 1  | 8  | 0  | 1  | 8    | 0      | 1      | 8      | 0         | 3         | 9.7       | 143.32    | 0         | 28.371    | 574540000 | 3.77E+08  | 1.57E+08 | 0        | 4034     |          |          |          |

|            |            |                                                               |          |               |    |    |    |   |    |    |    |   |    |    |    |    |    |    |      |        |          |        |           |           |          |           |          |          |          |           |          |          |
|------------|------------|---------------------------------------------------------------|----------|---------------|----|----|----|---|----|----|----|---|----|----|----|----|----|----|------|--------|----------|--------|-----------|-----------|----------|-----------|----------|----------|----------|-----------|----------|----------|
| P46939     | P46939     | Utrophin                                                      | UTRN     | sp P46939     | 19 | 19 | 19 | 3 | 13 | 4  | 16 | 3 | 13 | 4  | 16 | 3  | 13 | 4  | 16   | 7.9    | 394.46   | 0      | 74.933    | 535060000 | 6743500  | 1.24E+08  | 5273700  | 3.99E+08 | 1665600  | 3816400   | 1700200  | 30450000 |
| Q9GZT8;AI  | Q9GZT8     | NIF3-like protein 1                                           | NIF3L1   | sp Q9GZT8     | 6  | 6  | 6  | 0 | 6  | 0  | 6  | 0 | 6  | 0  | 6  | 0  | 6  | 0  | 6    | 21.8   | 41.968   | 0      | 25.067    | 534540000 | 0        | 2.29E+08  | 0        | 3.05E+08 | 0        | 19855000  | 0        | 12905000 |
| Q9Y3A5     | Q9Y3A5     | Ribosome maturation protein SBD5                              | SBD5     | sp Q9Y3A5     | 9  | 9  | 9  | 1 | 8  | 1  | 7  | 1 | 8  | 1  | 7  | 1  | 8  | 1  | 7    | 34.8   | 28.763   | 0      | 21.072    | 534290000 | 4635000  | 2.23E+08  | 411430   | 3.06E+08 | 3349800  | 28256000  | 818130   | 4747500  |
| Q8NBJ7     | Q8NBJ7     | Sulfatase-modifying factor 2                                  | SUMF2    | sp Q8NBJ7     | 7  | 7  | 7  | 0 | 7  | 1  | 7  | 0 | 7  | 1  | 7  | 0  | 7  | 1  | 7    | 29.9   | 33.843   | 0      | 23.157    | 533440000 | 0        | 2.32E+08  | 1395100  | 3E+08    | 0        | 24996000  | 2054800  | 6668100  |
| Q53G59     | Q53G59     | U4/U6,U5-tri-snRNP-associated protein 2                       | USP39    | sp Q53G59     | 8  | 8  | 2  | 7 | 7  | 7  | 7  | 7 | 7  | 7  | 7  | 7  | 7  | 7  | 19.5 | 65.38  | 0        | 33.009 | 533050000 | 20855000  | 1.31E+08 | 28879000  | 3.52E+08 | 33406000 | 11365000 | 10754000  | 9775600  |          |
| Q8N3F8     | Q8N3F8     | MICAL-like protein 1                                          | MICAL1   | sp Q8N3F8     | 10 | 10 | 10 | 0 | 6  | 1  | 10 | 0 | 6  | 1  | 10 | 0  | 6  | 1  | 10   | 22.7   | 93.44    | 0      | 41.842    | 532840000 | 0        | 49213000  | 551230   | 4.83E+08 | 0        | 2543000   | 586610   | 21449000 |
| Q96F86     | Q96F86     | Enhancer of mRNA-decapping protein 3                          | EDC3     | sp Q96F86     | 9  | 9  | 9  | 5 | 8  | 0  | 9  | 5 | 8  | 0  | 9  | 5  | 8  | 0  | 9    | 23.8   | 56.077   | 0      | 21.753    | 531400000 | 0        | 1.77E+08  | 8971600  | 3.45E+08 | 0        | 14075000  | 11147000 | 10615000 |
| P10301     | P10301     | Ras-related protein R-Ras                                     | RAS      | sp P10301     | 5  | 5  | 5  | 0 | 5  | 0  | 5  | 0 | 5  | 0  | 5  | 0  | 5  | 0  | 3    | 27.1   | 23.48    | 0      | 18.823    | 531200000 | 0        | 12641000  | 0        | 3.19E+08 | 0        | 2490700   | 0        | 19950000 |
| Q43670     | Q43670     | BUB3-interacting and GLEBS motif-containing pro ZNF207        | ZNF207   | sp Q43670     | 6  | 6  | 6  | 1 | 6  | 3  | 6  | 1 | 6  | 3  | 6  | 1  | 6  | 3  | 6    | 15.5   | 50.75    | 0      | 32.111    | 531130000 | 2613600  | 2.14E+08  | 10916000 | 3.04E+08 | 3919900  | 20978000  | 6477700  | 9905200  |
| Q2M389     | Q2M389     | WASH complex subunit 7                                        | KIAA1083 | sp Q2M389     | 13 | 13 | 0  | 4 | 0  | 13 | 0  | 4 | 0  | 13 | 0  | 4  | 0  | 13 | 17.3 | 136.4  | 0        | 79.186 | 530400000 | 0         | 47552000 | 0         | 4.83E+08 | 0        | 770060   | 0         | 23279000 |          |
| Q8N8F2     | Q8N8F2     | NH1 repeat-containing protein 2                               | NHLKC2   | sp Q8N8F2     | 9  | 9  | 9  | 1 | 9  | 0  | 8  | 1 | 9  | 0  | 8  | 1  | 9  | 0  | 8    | 21.5   | 79.443   | 0      | 41.444    | 530190000 | 5116900  | 2.4E+08   | 0        | 2.85E+08 | 6811500  | 21178000  | 0        | 9280000  |
| Q9Z797     | Q9Z797     | Symplexin                                                     | SYMPK    | sp Q9Z797     | 12 | 12 | 12 | 0 | 11 | 3  | 10 | 0 | 11 | 3  | 10 | 0  | 11 | 3  | 10   | 11.8   | 141.15   | 0      | 40.337    | 529540000 | 0        | 2.3E+08   | 3074800  | 2.96E+08 | 0        | 25434000  | 1953300  | 7153700  |
| Q8NSK1     | Q8NSK1     | CDGS8 iron-sulfur domain-containing protein 2                 | CSD2     | sp Q8NSK1     | 5  | 5  | 5  | 0 | 4  | 5  | 5  | 0 | 4  | 5  | 5  | 0  | 4  | 5  | 5    | 31.9   | 15.278   | 0      | 13.621    | 529050000 | 0        | 2.14E+08  | 10646000 | 3.05E+08 | 0        | 18905000  | 7799200  | 11811000 |
| Q9Y3A6     | Q9Y3A6     | Transmembrane emp24 domain-containing protein TME4D5          | Q9Y3A6   | sp Q9Y3A6     | 5  | 5  | 5  | 1 | 5  | 0  | 4  | 1 | 5  | 0  | 4  | 1  | 5  | 0  | 4    | 27.1   | 26.005   | 0      | 34.326    | 528590000 | 70811000 | 2.68E+08  | 0        | 2.54E+08 | 7058200  | 25718000  | 0        | 8336400  |
| Q8NCAS     | Q8NCAS     | Protein FAM58A                                                | FAM58A   | sp Q8NCAS     | 7  | 4  | 2  | 5 | 6  | 6  | 2  | 3 | 4  | 2  | 3  | 4  | 2  | 3  | 4    | 18.1   | 55.272   | 0      | 33.493    | 527470000 | 70211000 | 1.09E+08  | 60871000 | 2.87E+08 | 9857400  | 12314000  | 96576000 | 13803000 |
| Q9UC08     | Q9UC08     | Brain-specific angiogenesis inhibitor 1-associated TME4D5     | BAIAP2   | sp Q9UC08     | 12 | 12 | 12 | 0 | 8  | 12 | 0  | 8 | 12 | 0  | 8  | 12 | 0  | 8  | 12   | 29.3   | 52.693   | 0      | 26.379    | 526930000 | 0        | 98789000  | 24098000 | 4.04E+08 | 0        | 90879000  | 20330000 | 12101000 |
| Q6NUK1     | Q6NUK1     | Calcium-binding mitochondrial carrier protein SC              | SLC25A24 | sp Q6NUK1     | 12 | 12 | 12 | 0 | 10 | 3  | 9  | 0 | 10 | 3  | 9  | 0  | 10 | 3  | 9    | 31.4   | 53.354   | 0      | 45.204    | 525930000 | 0        | 2.42E+08  | 3439600  | 2.8E+08  | 0        | 18977000  | 5422700  | 10781000 |
| P21266     | P21266     | Glutathione S-transferase Mu 3                                | GSTM3    | sp P21266     | 10 | 10 | 9  | 3 | 9  | 1  | 3  | 9 | 1  | 3  | 9  | 1  | 2  | 8  | 0    | 47.1   | 26.559   | 0      | 44.586    | 524820000 | 25065000 | 4.83E+08  | 0        | 16411000 | 13285000 | 53746000  | 0        | 13143000 |
| P22087;A6  | P22087     | rRNA 2-O-methyltransferase fibrillarin                        | FBL      | sp P22087     | 9  | 9  | 9  | 0 | 6  | 8  | 8  | 0 | 6  | 8  | 8  | 0  | 6  | 8  | 8    | 43     | 33.784   | 0      | 47.734    | 524280000 | 0        | 31074000  | 81115000 | 4.12E+08 | 0        | 5402400   | 20540000 | 17627000 |
| Q9NQT5     | Q9NQT5     | Exosome complex component RRP40                               | EXOSC3   | sp Q9NQT5     | 5  | 5  | 5  | 0 | 2  | 4  | 5  | 0 | 2  | 4  | 5  | 0  | 2  | 4  | 5    | 39.6   | 29.572   | 0      | 45.261    | 523530000 | 0        | 1.56E+08  | 33044000 | 3.34E+08 | 0        | 15279000  | 58251000 | 85979000 |
| P41208;Q1  | P41208     | Centrin-2                                                     | CETN2    | sp P41208     | 5  | 5  | 5  | 0 | 4  | 3  | 4  | 0 | 4  | 3  | 4  | 0  | 4  | 3  | 4    | 48.8   | 19.738   | 0      | 103.14    | 523270000 | 0        | 2.17E+08  | 18615000 | 2.88E+08 | 0        | 17580000  | 11176000 | 14698000 |
| P53701     | P53701     | Cytochrome c-type heme lyase                                  | HCCS     | sp P53701     | 10 | 10 | 10 | 1 | 10 | 0  | 10 | 0 | 10 | 0  | 10 | 0  | 10 | 0  | 8    | 52.6   | 30.601   | 0      | 42.898    | 523010000 | 6028900  | 3.79E+08  | 0        | 1.38E+08 | 12819000 | 2960000   | 0        | 2678100  |
| Q9H2M9     | Q9H2M9     | Rab3 GTPase-activating protein non-catalytic subunit RAB3GAP2 | Q9H2M9   | sp Q9H2M9     | 14 | 14 | 14 | 2 | 14 | 0  | 14 | 2 | 14 | 0  | 14 | 2  | 14 | 0  | 14   | 13.6   | 15.958   | 0      | 54.619    | 522760000 | 0        | 89551000  | 866060   | 4.32E+08 | 0        | 9008400   | 689980   | 16549000 |
| Q95400     | Q95400     | CD2 antigen cytoplasmic tail-binding protein 2                | CD2BP2   | sp Q95400     | 7  | 7  | 7  | 1 | 7  | 6  | 4  | 1 | 7  | 6  | 4  | 1  | 7  | 6  | 4    | 26.4   | 37.646   | 0      | 26.591    | 522400000 | 1207400  | 3.07E+08  | 45489000 | 1.69E+08 | 4944400  | 20263000  | 33272000 | 7284700  |
| Q8BX55     | Q8BX55     | Histone-arginine methyltransferase CARM1                      | CARM1    | sp Q8BX55     | 7  | 7  | 7  | 0 | 7  | 0  | 5  | 0 | 7  | 0  | 5  | 0  | 7  | 0  | 5    | 19.4   | 65.853   | 0      | 32.367    | 522240000 | 0        | 2.15E+08  | 0        | 3.07E+08 | 0        | 14802000  | 0        | 13977000 |
| Q9Y4F3     | Q9Y4F3     | Transducin beta-like protein 2                                | TBL2     | sp Q9Y4F3     | 7  | 7  | 7  | 3 | 5  | 5  | 7  | 3 | 5  | 5  | 7  | 3  | 5  | 5  | 7    | 23.5   | 49.797   | 0      | 30.046    | 521540000 | 9301800  | 7.5014000 | 36234000 | 4.01E+08 | 17093000 | 4884300   | 22724000 | 12053000 |
| P13995     | P13995     | Bifunctional methyltetrahydrofolate dehydrogenase MTHFD2      | MTHFD2   | sp P13995     | 7  | 7  | 7  | 0 | 6  | 3  | 6  | 0 | 6  | 3  | 6  | 0  | 6  | 3  | 6    | 29.1   | 37.895   | 0      | 18.984    | 519920000 | 0        | 3.51E+08  | 1559100  | 1.67E+08 | 0        | 35466000  | 672810   | 27377000 |
| P50995;P2  | P50995     | Annexin A11                                                   | ANXA11   | sp P50995     | 6  | 6  | 6  | 1 | 5  | 2  | 7  | 1 | 5  | 2  | 7  | 1  | 5  | 2  | 7    | 13.1   | 54.389   | 0      | 18.646    | 519530000 | 217780   | 1.61E+08  | 1595100  | 3.57E+08 | 1926900  | 6289300   | 2156700  | 19777000 |
| Q8WUX9     | Q8WUX9     | Charged multivesicular body protein 7                         | CHMP7    | sp Q8WUX9     | 6  | 6  | 6  | 1 | 3  | 0  | 6  | 1 | 3  | 0  | 6  | 1  | 3  | 0  | 6    | 21.2   | 50.91    | 0      | 35.6      | 518150000 | 1.53E+08 | 29285000  | 0        | 3.86E+08 | 1.22E+08 | 31000000  | 0        | 16087000 |
| Q16630     | Q16630     | Cleavage and polyadenylation specificity factor subunit CPSF6 | CPSF6    | sp Q16630     | 7  | 7  | 7  | 2 | 7  | 5  | 6  | 2 | 7  | 5  | 6  | 2  | 7  | 5  | 6    | 13.8   | 59.209   | 0      | 32.408    | 518040000 | 4058800  | 2.92E+08  | 12707000 | 2.09E+08 | 5311400  | 22060000  | 8747400  | 10831000 |
| P30533     | P30533     | Alpha-2-macroglobulin receptor-associated protein LRPA1       | LRPA1    | sp P30533     | 11 | 11 | 11 | 1 | 10 | 8  | 9  | 1 | 10 | 8  | 9  | 1  | 10 | 8  | 9    | 38.1   | 41.465   | 0      | 32.604    | 517300000 | 450210   | 2.04E+08  | 15726000 | 2.97E+08 | 2271800  | 8730400   | 11117000 | 19093000 |
| P41240;P4  | P41240     | Tyrosine-protein kinase CSK                                   | CSK      | sp P41240     | 11 | 11 | 11 | 1 | 11 | 0  | 10 | 1 | 11 | 0  | 10 | 1  | 11 | 0  | 10   | 28     | 50.704   | 0      | 28.659    | 516070000 | 88621    | 2.42E+08  | 0        | 2.74E+08 | 365610   | 28526000  | 0        | 3800000  |
| A0A0B411Y9 | A0A0B411Y9 | ADA0B411V6;ADA0B411V0                                         | IGHV3-72 | sp A0A0B411Y9 | 1  | 1  | 1  | 0 | 1  | 0  | 1  | 0 | 1  | 0  | 1  | 0  | 1  | 0  | 5.9  | 13.203 | 0.004543 | 1.8751 | 515680000 | 7645000   | 0        | 508030000 | 0        | 7648500  | 0        | 340830000 | 0        | 0        |
| Q9BRX2     | Q9BRX2     | Protein pelota homolog                                        | PELO     | sp Q9BRX2     | 8  | 8  | 8  | 1 | 8  | 3  | 8  | 1 | 8  | 3  | 8  | 1  | 8  | 3  | 8    | 27.3   | 43.359   | 0      | 97.745    | 514190000 | 901900   | 1.24E+08  | 13444000 | 3.75E+08 | 1453300  | 11338000  | 10235000 | 13317000 |
| Q9BPX5     | Q9BPX5     | Actin-related protein 2/3 complex subunit 5-like 1            | ARPC5L   | sp Q9BPX5     | 5  | 3  | 3  | 0 | 4  | 1  | 4  | 0 | 2  | 1  | 3  | 0  | 2  | 1  | 3    | 49     | 16.41    | 0      | 73.525    | 512640000 | 0        | 98834000  | 2028700  | 4.12E+08 | 0        | 6977000   | 4537200  | 15501000 |
| Q9GZ08;A   | Q9GZ08;A   | Microtubule-associated proteins 1A/1B light chain MAP1LC3E    | MAP1LC3E | sp Q9GZ08     | 2  | 2  | 2  | 0 | 2  | 2  | 2  | 0 | 2  | 2  | 2  | 0  | 2  | 2  | 2    | 16.8   | 14.688   | 0      | 5.283     | 512260000 | 0        | 40791000  | 5867200  | 4.66E+08 | 0        | 3943500   | 3872000  | 18868000 |
| Q94906     | Q94906     | Pre-mRNA-processing factor 6                                  | PRPF6    | sp Q94906     | 18 | 18 | 18 | 4 | 14 | 14 | 14 | 4 | 14 | 14 | 14 | 4  | 14 | 14 | 20   | 106.92 | 0        | 70.457 | 512140000 | 33116000  | 1.58E+08 | 41014000  | 3.1E+08  | 4141200  | 13654000 | 26065000  | 12450000 |          |
| Q00765     | Q00765     | Receptor expression-enhancing protein 5                       | REEP5    | sp Q00765     | 5  | 5  | 5  | 0 | 5  | 2  | 4  | 0 | 5  | 2  | 4  | 0  | 5  | 2  | 4    | 21.7   | 21.493   | 0      | 11.458    | 510290000 | 0        | 2.07E+08  | 1748000  | 3.01E+08 | 0        | 16249000  | 1493900  | 14097000 |
| Q9Y376;Q   | Q9Y376     | Calcium-binding protein 39                                    | CAB39    | sp Q9Y376     | 9  | 9  | 9  | 0 | 8  | 0  | 9  | 0 | 8  | 0  | 9  | 0  | 8  | 0  | 9    | 24.3   | 39.869   | 0      | 26.875    | 510150000 | 0        | 2.48E+08  | 0        | 2.62E+08 | 0        | 18209000  | 0        | 14425000 |
| Q9H9A6     | Q9H9A6     | Leucine-rich repeat-containing protein 40                     | LRR40    | sp Q9H9A6     | 12 | 12 | 12 | 0 | 10 | 0  | 11 | 0 | 10 | 0  | 11 | 0  | 10 | 0  | 11   | 25.6   | 68.249   | 0      | 36.395    | 508930000 | 0        | 2.39E+08  | 0        | 2.7E+08  | 0        | 19821000  | 0        | 11898000 |
| Q9C0B1     | Q9C0B1     | Alpha-ketoglutarate-dependent dioxygenase FTO                 | FTO      | sp Q9C0B1     | 8  | 8  | 8  | 0 | 8  | 0  | 8  | 0 | 8  | 0  | 8  | 0  | 8  | 0  | 8    | 22     | 58.281   | 0      | 31.305    | 508920000 | 0        | 1.74E+08  | 0        | 3.35E+08 | 0        | 19951000  | 0        | 14745000 |
| Q7L0Y3     | Q7L0Y3     | Mitochondrial ribonuclease P protein 1                        | TRMT10C  | sp Q7L0Y3     | 8  | 8  | 8  | 1 | 7  | 3  | 8  | 1 | 7  | 3  | 8  | 1  | 7  | 3  | 8    | 31.5   | 47.346   | 0      | 44.675    | 508700000 | 0        | 1.23E+08  | 7875800  | 3.78E+08 | 0        | 10021000  | 8092900  | 135      |

|           |        |                                                                                |          |         |    |    |    |   |    |    |    |   |    |    |    |    |    |      |        |        |         |           |           |           |           |          |           |          |          |          |          |          |         |
|-----------|--------|--------------------------------------------------------------------------------|----------|---------|----|----|----|---|----|----|----|---|----|----|----|----|----|------|--------|--------|---------|-----------|-----------|-----------|-----------|----------|-----------|----------|----------|----------|----------|----------|---------|
| O75116    | O75116 | Rho-associated protein kinase 2                                                | ROCK2    | 075116f | 17 | 17 | 15 | 0 | 14 | 1  | 15 | 0 | 14 | 1  | 15 | 0  | 12 | 1    | 13     | 18.7   | 160.9   | 0         | 60.949    | 482810000 | 0         | 1.41E+08 | 1294100   | 3.4E+08  | 0        | 6345200  | 1938600  | 19042000 |         |
| Q8N304    | Q8N304 | EH domain-binding protein 1-like protein 1                                     | EHPBP1L1 | 07Q8N30 | 16 | 16 | 16 | 0 | 1  | 4  | 16 | 0 | 1  | 4  | 16 | 0  | 1  | 4    | 16     | 21     | 161.57  | 0         | 84.275    | 481250000 | 0         | 8503800  | 28940000  | 4.4E+08  | 0        | 1996160  | 10859000 | 25594000 |         |
| Q8Y81     | Q8Y81  | pre-rRNA processing protein FTSJ3                                              | FTSJ3    | 08Y81   | 13 | 13 | 13 | 1 | 9  | 10 | 8  | 1 | 9  | 10 | 8  | 1  | 9  | 10   | 8      | 24.1   | 96.855  | 0         | 44.456    | 479070000 | 578120    | 1.71E+08 | 101570000 | 2.06E+08 | 1245900  | 8385400  | 76062000 | 6662900  |         |
| Q9H1A4    | Q9H1A4 | Anaphase-promoting complex subunit 1                                           | ANAPC1   | 09H1A   | 17 | 17 | 17 | 0 | 9  | 17 | 11 | 0 | 9  | 17 | 11 | 0  | 9  | 17   | 11     | 11.9   | 216.5   | 0         | 50.314    | 477610000 | 0         | 64269000 | 153340000 | 2.6E+08  | 0        | 9851000  | 97853000 | 11679000 |         |
| Q9UI26    | Q9UI26 | Importin-11                                                                    | IPO11    | 09UI26  | 10 | 10 | 10 | 0 | 10 | 0  | 9  | 0 | 10 | 0  | 9  | 0  | 10 | 0    | 9      | 12.5   | 112.53  | 0         | 37.099    | 477470000 | 0         | 1.14E+08 | 0         | 3.6E+08  | 0        | 10099000 | 0        | 14899000 |         |
| Q9UIA5    | Q9UIA5 | tRNA (adenine(58)-N(1))-methyltransferase non-TRMT6                            | NCBP1    | 09UIA   | 11 | 11 | 11 | 1 | 7  | 4  | 11 | 1 | 7  | 4  | 11 | 1  | 7  | 4    | 11     | 36.8   | 55.799  | 0         | 39.926    | 476320000 | 3251200   | 1.19E+08 | 6112300   | 3.48E+08 | 8959400  | 9265500  | 5930800  | 8018900  |         |
| Q09161    | Q09161 | Nuclear cap-binding protein subunit 1                                          | NCBP1    | 099161  | 8  | 8  | 8  | 1 | 8  | 2  | 7  | 1 | 8  | 2  | 7  | 1  | 8  | 2    | 7      | 14.1   | 91.838  | 0         | 20.562    | 476290000 | 27993000  | 2.05E+08 | 16196000  | 2.27E+08 | 34401000 | 18372000 | 3494500  | 10002000 |         |
| P13822    | P13822 | Phosphoenolpyruvate carboxykinase [GTP], mitox                                 | PKC2     | 013822  | 7  | 7  | 7  | 0 | 0  | 6  | 0  | 7 | 0  | 6  | 0  | 7  | 0  | 6    | 14.1   | 70.698 | 0       | 31.281    | 476160000 | 0         | 2.79E+08  | 0        | 1.97E+08  | 0        | 21483000 | 0        | 8119400  |          |         |
| Q16943    | Q16943 | Heterogeneous nuclear ribonucleoprotein H3                                     | HNRNPH3  | 016943  | 9  | 9  | 9  | 0 | 8  | 7  | 9  | 0 | 8  | 7  | 9  | 0  | 8  | 7    | 9      | 35.8   | 36.926  | 0         | 59.899    | 475640000 | 0         | 2.02E+08 | 47148000  | 2.29E+08 | 0        | 21438000 | 25342000 | 12041000 |         |
| Q8NG73    | Q8NG73 | ADP-ribosylation factor GTPase-activating protein 1                            | ARFGAP1  | 08NG73  | 8  | 8  | 8  | 0 | 5  | 0  | 7  | 0 | 5  | 0  | 7  | 0  | 5  | 0    | 29.6   | 44.667 | 0       | 55.371    | 474780000 | 0         | 64218000  | 0        | 4.11E+08  | 0        | 6865400  | 0        | 15681000 |          |         |
| Q096V3    | Q096V3 | Nuclein                                                                        | NCLN     | 096V3   | 12 | 12 | 12 | 0 | 10 | 2  | 10 | 0 | 10 | 2  | 10 | 0  | 10 | 2    | 10     | 31.3   | 62.974  | 0         | 43.116    | 474270000 | 0         | 1.07E+08 | 4816600   | 3.6E+08  | 0        | 8032900  | 5257800  | 14271000 |         |
| Q9H7D7    | Q9H7D7 | WD repeat-containing protein 26                                                | WDR26    | 09H7D   | 11 | 11 | 11 | 0 | 10 | 3  | 10 | 0 | 10 | 3  | 10 | 0  | 10 | 3    | 10     | 19.7   | 72.123  | 0         | 25.102    | 473650000 | 0         | 2.05E+08 | 7391800   | 2.61E+08 | 0        | 14911000 | 4688300  | 14126000 |         |
| Q9Y673    | Q9Y673 | Dolichyl-phosphate beta-L-glucosyltransferase                                  | ALGS     | 09Y673  | 4  | 4  | 4  | 0 | 4  | 1  | 2  | 0 | 4  | 1  | 2  | 0  | 4  | 1    | 2      | 18.8   | 36.946  | 0         | 17.158    | 472590000 | 0         | 1.3E+08  | 1791400   | 3.41E+08 | 0        | 6575500  | 0        | 18907000 |         |
| Q9H9I2    | Q9H9I2 | 39S ribosomal protein L44, mitochondrial                                       | MRPL44   | 09H9I   | 4  | 4  | 4  | 0 | 8  | 4  | 7  | 0 | 8  | 4  | 7  | 0  | 8  | 4    | 7      | 32.8   | 37.535  | 0         | 23.321    | 472510000 | 0         | 1.88E+08 | 885700    | 2.75E+08 | 0        | 13623000 | 8614500  | 11635000 |         |
| P30622    | P30622 | CAP-Gly domain-containing linker protein 1                                     | CLIP1    | 030622  | 18 | 18 | 16 | 0 | 10 | 3  | 17 | 0 | 10 | 3  | 17 | 0  | 9  | 2    | 15     | 16     | 162.24  | 0         | 69.576    | 470880000 | 0         | 54690000 | 3582200   | 4.13E+08 | 0        | 3590400  | 5017600  | 15589000 |         |
| P49756    | P49756 | RNA-binding protein 25                                                         | RBM25    | 049756  | 8  | 8  | 8  | 3 | 8  | 5  | 8  | 3 | 8  | 5  | 8  | 3  | 8  | 5    | 8      | 13.2   | 100.18  | 0         | 23.171    | 470160000 | 24303000  | 1.25E+08 | 16721000  | 3.05E+08 | 28564000 | 1030900  | 13828000 | 6346300  |         |
| Q9UII2    | Q9UII2 | ATPase inhibitor, mitochondrial                                                | ATPIF1   | 09UII2  | 2  | 2  | 2  | 0 | 1  | 2  | 2  | 0 | 1  | 2  | 2  | 0  | 1  | 2    | 2      | 17     | 12.249  | 0         | 4.4932    | 469840000 | 0         | 2.45E+08 | 5960700   | 2.19E+08 | 0        | 26760000 | 2374100  | 5455500  |         |
| P06703    | P06703 | Protein S100-A6                                                                | S100A6   | 06703   | 1  | 1  | 1  | 1 | 1  | 1  | 1  | 0 | 1  | 1  | 1  | 0  | 1  | 1    | 1      | 8.9    | 10.18   | 0.001163  | 2.8485    | 469620000 | 0         | 76171000 | 3192000   | 4.59E+08 | 0        | 601410   | 1074900  | 20099000 |         |
| Q4V328    | Q4V328 | GRIP1-associated protein 1                                                     | GRIPAP1  | 04V328  | 12 | 12 | 12 | 0 | 12 | 0  | 7  | 0 | 12 | 0  | 7  | 0  | 12 | 0    | 7      | 25.1   | 96.004  | 0         | 27.276    | 469100000 | 0         | 2.74E+08 | 0         | 1.95E+08 | 0        | 12329000 | 0        | 10841000 |         |
| Q9BYD1    | Q9BYD1 | 39S ribosomal protein L13, mitochondrial                                       | MRPL13   | 09BYD   | 5  | 5  | 5  | 1 | 4  | 0  | 5  | 1 | 4  | 0  | 5  | 1  | 4  | 0    | 5      | 35.4   | 20.692  | 0         | 23.639    | 468660000 | 0         | 1.85E+08 | 1707500   | 2.82E+08 | 0        | 12305000 | 3994100  | 12765000 |         |
| Q95983    | Q95983 | Methyl-CpG-binding domain protein 3                                            | MBD3     | 095983  | 7  | 7  | 7  | 0 | 7  | 0  | 7  | 0 | 7  | 0  | 7  | 0  | 7  | 0    | 7      | 26.8   | 32.844  | 0         | 26.713    | 467690000 | 0         | 2.36E+08 | 0         | 2.32E+08 | 0        | 23251000 | 0        | 7085600  |         |
| P35221    | P35221 | Catenin alpha-11                                                               | CTNNA1   | 035221  | 11 | 11 | 8  | 0 | 10 | 6  | 8  | 0 | 10 | 6  | 8  | 0  | 7  | 4    | 5      | 21.4   | 104.007 | 0         | 139.96    | 467260000 | 0         | 1.43E+08 | 10075000  | 3.14E+08 | 0        | 10317000 | 7576900  | 14404000 |         |
| Q9NXG2    | Q9NXG2 | THUMP domain-containing protein 1                                              | THUMPD1  | 09NXG   | 7  | 7  | 7  | 0 | 1  | 6  | 0  | 1 | 6  | 0  | 1  | 6  | 0  | 1    | 6      | 29.2   | 39.315  | 0         | 24.522    | 466900000 | 0         | 1.79E+08 | 2145600   | 2.86E+08 | 0        | 13133000 | 3046100  | 12792000 |         |
| Q9NPD3    | Q9NPD3 | Exosome complex component RRP41                                                | EXOSC4   | 09NPD   | 6  | 6  | 6  | 1 | 6  | 4  | 4  | 1 | 6  | 4  | 4  | 1  | 6  | 4    | 29.8   | 26.383 | 0       | 27.328    | 466830000 | 704700    | 2.37E+08  | 3162400  | 1.98E+08  | 0        | 16116000 | 2258900  | 11537000 |          |         |
| Q724H8    | Q724H8 | KDEL motif-containing protein 2                                                | KDELTC1  | 0724H   | 3  | 3  | 3  | 0 | 3  | 0  | 3  | 0 | 3  | 0  | 3  | 0  | 3  | 0    | 7.5    | 58.572 | 0       | 16.706    | 466560000 | 0         | 83346000  | 0        | 3.82E+08  | 0        | 8871200  | 0        | 41198000 |          |         |
| Q15269    | Q15269 | Serine palmitoyltransferase 1                                                  | SPTLC1   | 015269  | 7  | 7  | 7  | 0 | 3  | 4  | 5  | 0 | 3  | 4  | 5  | 0  | 3  | 4    | 5      | 20.1   | 52.743  | 0         | 17.161    | 466560000 | 0         | 1.12E+08 | 18109000  | 3.36E+08 | 0        | 9538900  | 12754000 | 13527000 |         |
| Q9P9I2    | Q9P9I2 | ER membrane protein complex subunit 3                                          | EMC3     | 09P9I   | 5  | 5  | 5  | 1 | 5  | 0  | 5  | 1 | 5  | 0  | 5  | 1  | 5  | 0    | 5      | 25.7   | 29.952  | 0         | 57.95     | 465210000 | 553340    | 1.15E+08 | 0         | 3.49E+08 | 1112100  | 4558400  | 0        | 19409000 |         |
| P50281    | P50281 | Matrix metalloproteinase-14                                                    | MMP14    | 050281  | 4  | 4  | 4  | 0 | 4  | 4  | 0  | 4 | 0  | 4  | 4  | 0  | 4  | 0    | 4      | 10.1   | 65.893  | 0         | 16.931    | 465020000 | 0         | 0        | 19564000  | 4.55E+08 | 0        | 11955000 | 0        | 19512000 |         |
| O96A26    | O96A26 | Protein FAM162A                                                                | FAM162A  | 096A2   | 5  | 5  | 5  | 1 | 5  | 3  | 1  | 5 | 3  | 1  | 5  | 3  | 1  | 5    | 3      | 35.1   | 17.342  | 0         | 72.977    | 464820000 | 1176000   | 3.03E+08 | 3607900   | 1.59E+08 | 1403000  | 2494000  | 3073000  | 7328000  |         |
| O15173    | O15173 | Membrane-associated progesterone receptor coregulator 1                        | PRGRC2   | 015173  | 6  | 6  | 6  | 1 | 6  | 0  | 4  | 1 | 6  | 0  | 4  | 1  | 6  | 0    | 4      | 30.5   | 23.818  | 0         | 31.744    | 464440000 | 1144100   | 3.04E+08 | 0         | 1.6E+08  | 1914600  | 27133000 | 0        | 4974000  |         |
| Q96DH6    | Q96DH6 | RNA-binding protein Musashi homolog 2                                          | MSI2     | 096DH   | 6  | 6  | 6  | 1 | 3  | 0  | 6  | 1 | 3  | 0  | 6  | 1  | 3  | 0    | 6      | 25.6   | 35.196  | 0         | 19.138    | 463510000 | 0         | 3.32E+08 | 723080    | 1.31E+08 | 0        | 3082800  | 893070   | 3388100  |         |
| Q9NUO8    | Q9NUO8 | ATP-binding cassette sub-family F member 3                                     | ABCF3    | 09NUC   | 8  | 8  | 8  | 0 | 5  | 2  | 7  | 0 | 5  | 2  | 7  | 0  | 5  | 2    | 7      | 15.9   | 79.744  | 0         | 26.174    | 463290000 | 0         | 57675000 | 1570500   | 4.04E+08 | 0        | 6462100  | 0        | 15275000 |         |
| Q14738    | Q14738 | Serine/threonine-protein phosphatase 2A 56 kDa                                 | PPP2R5D  | 014738  | 8  | 8  | 6  | 0 | 7  | 1  | 8  | 0 | 7  | 1  | 8  | 0  | 6  | 20.8 | 69.991 | 0      | 21.563  | 462860000 | 0         | 1.12E+08  | 5264400   | 3.46E+08 | 0         | 9512600  | 5060200  | 13037000 |          |          |         |
| P41214    | P41214 | Eukaryotic translation initiation factor 2D                                    | EIF2D    | 041214  | 12 | 12 | 12 | 0 | 12 | 2  | 9  | 0 | 12 | 2  | 9  | 0  | 12 | 2    | 9      | 32     | 64.706  | 0         | 30.484    | 462520000 | 0         | 2.27E+08 | 1123100   | 2.34E+08 | 0        | 18257000 | 690890   | 11462000 |         |
| O60264;P2 | O60264 | SWI/SNF-related matrix-associated actin-dependent remodeling complex subunit 2 | SMARCA5  | 060264  | 17 | 17 | 17 | 0 | 15 | 10 | 15 | 0 | 15 | 10 | 15 | 0  | 15 | 10   | 15     | 17.3   | 121.9   | 0         | 36.302    | 461740000 | 0         | 1.55E+08 | 1927400   | 2.88E+08 | 0        | 10138000 | 18286000 | 10003000 |         |
| O00273    | O00273 | DNA fragmentation factor subunit alpha                                         | DFFA     | 000273  | 8  | 8  | 8  | 0 | 1  | 7  | 0  | 1 | 7  | 0  | 1  | 7  | 0  | 1    | 7      | 37.2   | 36.521  | 0         | 30.643    | 460810000 | 0         | 1.75E+08 | 1058600   | 2.85E+08 | 0        | 17407000 | 0        | 9740200  |         |
| Q9H6T3    | Q9H6T3 | RNA polymerase II-associated protein 3                                         | RPAP3    | 09H6T   | 10 | 10 | 10 | 1 | 7  | 4  | 9  | 1 | 7  | 4  | 9  | 1  | 7  | 4    | 9      | 23.5   | 75.718  | 0         | 40.18     | 460720000 | 1059600   | 1.11E+08 | 1752200   | 3.41E+08 | 2483900  | 11399000 | 5119900  | 10708000 |         |
| Q9BQ58    | Q9BQ58 | YYE and coiled-coil domain-containing protein 1                                | FYCO1    | 09BQ5   | 26 | 26 | 26 | 2 | 3  | 25 | 14 | 3 | 25 | 14 | 3  | 25 | 14 | 3    | 25     | 14     | 24.6    | 166.98    | 0         | 75.692    | 460050000 | 35609000 | 2.5110000 | 15184000 | 2.48E+08 | 33906000 | 2249100  | 10859000 | 5266000 |
| P18564    | P18564 | Integrin beta-6                                                                | ITGB6    | 018564  | 1  | 1  | 1  | 1 | 1  | 1  | 1  | 0 | 1  | 1  | 1  | 0  | 1  | 1    | 1      | 1.1    | 85.935  | 0.003292  | 2.0834    | 459750000 | 0         | 12990000 | 3558500   | 4.43E+08 | 0        | 1145000  | 2391300  | 18227000 |         |
| O00629    | O00629 | Importin subunit alpha-3                                                       | KPNA4    | 000629  | 8  | 4  | 4  | 1 | 6  | 1  | 7  | 0 | 6  | 1  | 7  | 0  | 4  | 21.5 | 57.886 | 0      | 58.059  | 458400000 | 0         | 1.45E+08  | 0         | 0        | 3.13E+08  | 0        | 12002000 | 0        | 13677000 |          |         |
| Q9Y5Y2    | Q9Y5Y2 | Cytosolic Fe-S cluster assembly factor NUBP2                                   | NUBP2    | 09Y5Y   | 3  | 3  | 3  | 0 | 3  | 0  | 3  | 0 | 3  | 0  | 3  | 0  | 3  | 0    | 3      | 21.4   | 28.825  | 0         | 20.867    | 457800000 | 0         | 1.92E+08 | 0         | 2.66E+08 | 0        | 14009000 | 0        | 13838000 |         |
| Q8I2P0    | Q8I2P0 | Abi interactor 1                                                               | ABI1     | 08I2P   | 10 | 10 | 10 | 0 | 9  | 3  | 8  | 0 | 9  | 3  | 8  | 0  | 7  | 2    | 6      | 26     | 55.08   | 0         | 32.894    | 456600000 | 0         | 1.91E+08 | 5491100   | 2.6E+08  | 0        | 17639000 | 1581500  | 12000000 |         |
| Q9HC07    | Q9HC07 | Transmembrane protein 165                                                      | TMEM165  | 09HC0   | 4  | 4  | 4  | 0 | 3  | 4  | 0  | 3 | 4  | 0  | 3  | 4  | 0  | 3    | 4      | 19.4   | 34.905  | 0         | 53.046    | 454410000 | 0         | 56163000 | 19879000  | 3.79E+   |          |          |          |          |         |

|        |        |                                                            |          |           |    |    |    |    |    |    |    |   |    |    |    |    |    |    |    |       |          |        |          |           |           |          |          |           |          |          |          |           |         |
|--------|--------|------------------------------------------------------------|----------|-----------|----|----|----|----|----|----|----|---|----|----|----|----|----|----|----|-------|----------|--------|----------|-----------|-----------|----------|----------|-----------|----------|----------|----------|-----------|---------|
| Q8I283 | Q8I283 | Aldehyde dehydrogenase family 16 member A1                 | ALDH16A1 | sp Q8I283 | 9  | 9  | 9  | 0  | 9  | 1  | 4  | 0 | 9  | 1  | 4  | 0  | 9  | 1  | 4  | 18.2  | 85.126   | 0      | 29.949   | 431350000 | 0         | 2.79E+08 | 771210   | 1.51E+08  | 0        | 20012000 | 0        | 10831000  |         |
| P61009 | P61009 | Signal peptidase complex subunit 3                         | SPCS3    | sp P61009 | 2  | 2  | 2  | 0  | 2  | 1  | 2  | 0 | 2  | 1  | 2  | 0  | 2  | 1  | 2  | 12.8  | 20.313   | 0      | 11.933   | 431310000 | 0         | 1.75E+08 | 2675000  | 2.54E+08  | 0        | 11204000 | 2431700  | 7873200   |         |
| P19388 | P19388 | DNA-directed RNA polymerases I, II, and III subunit POLR2E | POLR2E   | sp P19388 | 3  | 3  | 3  | 0  | 3  | 3  | 2  | 0 | 3  | 3  | 2  | 0  | 3  | 3  | 2  | 16.7  | 24.551   | 0      | 17.667   | 430560000 | 0         | 1.38E+08 | 12213000 | 2.8E+08   | 0        | 10127000 | 12219000 | 9548800   |         |
| Q9H0A8 | Q9H0A8 | COMM domain-containing protein 4                           | COMM04   | sp Q9H0A8 | 5  | 5  | 5  | 0  | 2  | 0  | 5  | 0 | 2  | 0  | 5  | 0  | 2  | 0  | 5  | 33.7  | 21.764   | 0      | 9.4591   | 429890000 | 0         | 7059500  | 0        | 4.23E+08  | 0        | 2862500  | 0        | 15149000  |         |
| Q99816 | Q99816 | Tumor susceptibility gene 101 protein                      | TSG101   | sp Q99816 | 7  | 7  | 7  | 0  | 6  | 3  | 7  | 0 | 6  | 3  | 7  | 0  | 6  | 3  | 7  | 24.9  | 43.944   | 0      | 24.884   | 429540000 | 0         | 1.19E+08 | 4466400  | 3.06E+08  | 0        | 9825000  | 4324300  | 11941000  |         |
| Q9UI09 | Q9UI09 | NADH dehydrogenase [ubiquinone] 1 alpha subunit NDUFA12    | NDUFA12  | sp Q9UI09 | 8  | 8  | 8  | 1  | 6  | 1  | 6  | 1 | 6  | 1  | 6  | 1  | 6  | 1  | 6  | 67.6  | 17.114   | 0      | 22.845   | 429480000 | 1847900   | 1.38E+08 | 802830   | 2.89E+08  | 0        | 12319000 | 865500   | 11388000  |         |
| O95197 | O95197 | Reticulon-3                                                | RTN3     | sp O95197 | 3  | 3  | 3  | 1  | 3  | 2  | 3  | 1 | 3  | 2  | 3  | 1  | 3  | 2  | 3  | 5.6   | 11.621   | 0      | 13.119   | 429120000 | 588460    | 1.82E+08 | 3087300  | 2.44E+08  | 1029300  | 15594000 | 1015200  | 11072000  |         |
| Q13630 | Q13630 | GDP-L-fucose synthase                                      | TLTA3    | sp Q13630 | 6  | 6  | 6  | 0  | 5  | 0  | 6  | 0 | 5  | 0  | 6  | 0  | 5  | 0  | 6  | 22.1  | 35.892   | 0      | 15.569   | 428510000 | 0         | 1.22E+08 | 0        | 3.06E+08  | 0        | 11260000 | 0        | 12166000  |         |
| Q9NY77 | Q9NY77 | Elongation of very long chain fatty acids protein 5        | ELOVL5   | sp Q9NY77 | 2  | 2  | 2  | 0  | 1  | 1  | 2  | 0 | 1  | 1  | 2  | 0  | 1  | 1  | 2  | 13.4  | 35.293   | 0      | 14.113   | 428300000 | 0         | 53668000 | 12809000 | 3.62E+08  | 0        | 4986400  | 9072700  | 13552000  |         |
| Q9H9Q2 | Q9H9Q2 | CF9 signalosome complex subunit 7b                         | CF9F7B   | sp Q9H9Q2 | 5  | 5  | 5  | 0  | 5  | 0  | 5  | 0 | 5  | 0  | 5  | 0  | 5  | 0  | 5  | 27.3  | 29.622   | 0      | 30.823   | 428110000 | 0         | 1.71E+08 | 0        | 2.57E+08  | 0        | 15750000 | 0        | 9990400   |         |
| O96000 | O96000 | NADH dehydrogenase [ubiquinone] 1 beta subunit NDUFB10     | NDUFB10  | sp O96000 | 5  | 5  | 5  | 0  | 5  | 2  | 5  | 0 | 5  | 2  | 5  | 0  | 5  | 2  | 5  | 37.2  | 20.776   | 0      | 14.704   | 428090000 | 0         | 1.83E+08 | 1501200  | 2.44E+08  | 0        | 17386000 | 3559000  | 61892000  |         |
| O94915 | O94915 | Protein furlin homolog-like                                | FRYL     | sp O94915 | 15 | 15 | 15 | 0  | 2  | 1  | 15 | 0 | 2  | 1  | 15 | 0  | 2  | 1  | 15 | 7     | 339.59   | 0      | 47.522   | 427850000 | 0         | 6960000  | 559960   | 4.2E+08   | 0        | 371400   | 300950   | 17624000  |         |
| Q8IWB9 | Q8IWB9 | Testis-expressed sequence 2 protein                        | TEX2     | sp Q8IWB9 | 15 | 15 | 15 | 4  | 2  | 15 | 4  | 2 | 15 | 4  | 2  | 15 | 4  | 2  | 15 | 4     | 20.7     | 125.3  | 0        | 42.244    | 427770000 | 2270600  | 3373200  | 376120000 | 4600000  | 328810   | 148160   | 256280000 | 451410  |
| O95218 | O95218 | Zinc finger Ran-binding domain-containing protein ZRANB2   | ZRANB2   | sp O95218 | 8  | 8  | 8  | 0  | 5  | 8  | 6  | 0 | 5  | 8  | 6  | 0  | 5  | 8  | 6  | 27.6  | 37.340   | 0      | 36.92    | 427660000 | 0         | 81570000 | 21588000 | 1.29E+08  | 0        | 11583000 | 14062000 | 6482800   |         |
| Q9UKD2 | Q9UKD2 | mRNA turnover protein 4 homolog                            | MRT04    | sp Q9UKD2 | 6  | 6  | 6  | 0  | 5  | 5  | 5  | 0 | 5  | 5  | 5  | 0  | 5  | 5  | 5  | 32.2  | 27.56    | 0      | 32.047   | 426980000 | 0         | 1.2E+08  | 19128000 | 2.88E+08  | 0        | 8642400  | 16407000 | 10226000  |         |
| O14562 | O14562 | Ubiquitin domain-containing protein UBFD1                  | UBFD1    | sp O14562 | 5  | 5  | 5  | 0  | 4  | 0  | 4  | 0 | 4  | 0  | 4  | 0  | 4  | 0  | 4  | 27.2  | 33.382   | 0      | 19.897   | 426770000 | 0         | 1.36E+08 | 0        | 2.91E+08  | 0        | 1425300  | 0        | 9699200   |         |
| Q9H3K2 | Q9H3K2 | Growth hormone-inducible transmembrane protein GHITM       | GHITM    | sp Q9H3K2 | 6  | 6  | 6  | 1  | 6  | 0  | 5  | 1 | 6  | 0  | 5  | 1  | 6  | 0  | 5  | 15.1  | 37.205   | 0      | 19.57    | 426500000 | 338310    | 2.27E+08 | 0        | 2E+08     | 483040   | 20681000 | 3756900  |           |         |
| Q9NWX4 | Q9NWX4 | UPFD609 protein C4orf27                                    | C4orf27  | sp Q9NWX4 | 4  | 4  | 4  | 0  | 4  | 0  | 4  | 0 | 4  | 0  | 4  | 0  | 4  | 0  | 4  | 14.7  | 39.436   | 0      | 10.661   | 426340000 | 0         | 1.15E+08 | 0        | 3.12E+08  | 0        | 1031000  | 0        | 12578000  |         |
| Q96EK5 | Q96EK5 | KIF1-binding protein                                       | KIAA1279 | sp Q96EK5 | 8  | 8  | 8  | 0  | 6  | 0  | 7  | 0 | 6  | 0  | 7  | 0  | 6  | 0  | 7  | 24    | 71.813   | 0      | 48.93    | 426270000 | 0         | 1.35E+08 | 0        | 2.91E+08  | 0        | 12925000 | 0        | 10956000  |         |
| O43252 | O43252 | Bifunctional 3-phosphoadenosine 5-phosphosulfate PAPS1     | PAPS1    | sp O43252 | 9  | 9  | 9  | 0  | 9  | 0  | 9  | 0 | 9  | 0  | 9  | 0  | 9  | 0  | 9  | 18.9  | 70.832   | 0      | 21.245   | 425650000 | 0         | 69589000 | 0        | 3.56E+08  | 0        | 8824500  | 0        | 11953000  |         |
| Q5XKPO | Q5XKPO | Protein QIL1                                               | QIL1     | sp Q5XKPO | 3  | 3  | 3  | 0  | 3  | 2  | 3  | 1 | 3  | 2  | 3  | 1  | 3  | 2  | 3  | 41.5  | 13.087   | 0      | 29.036   | 424740000 | 6357200   | 7933300  | 7907200  | 3.31E+08  | 9748900  | 6497500  | 7333300  | 8703800   |         |
| P45954 | P45954 | Short/brachy chain specific acyl-CoA dehydrogenase ACADS8  | ACADS8   | sp P45954 | 8  | 8  | 8  | 1  | 8  | 0  | 6  | 1 | 8  | 0  | 6  | 1  | 8  | 0  | 6  | 28.5  | 47.485   | 0      | 24.412   | 424130000 | 0         | 72889000 | 2.86E+08 | 0         | 65388000 | 0        | 24109000 | 0         | 3777700 |
| Q13158 | Q13158 | FAS-associated death domain protein                        | FADD     | sp Q13158 | 3  | 3  | 3  | 0  | 2  | 0  | 3  | 0 | 2  | 0  | 3  | 0  | 2  | 0  | 3  | 20.7  | 23.279   | 0      | 32.122   | 420110000 | 0         | 30113000 | 0        | 3.9E+08   | 0        | 4677700  | 0        | 14017000  |         |
| Q9NRF8 | Q9NRF8 | CTP synthase 2                                             | CTPS2    | sp Q9NRF8 | 9  | 9  | 9  | 0  | 1  | 9  | 1  | 7 | 1  | 6  | 0  | 5  | 1  | 6  | 0  | 5     | 23.9     | 65.677 | 0        | 20.902    | 419820000 | 148670   | 2.21E+08 | 0         | 1.99E+08 | 302990   | 25504000 | 0         | 1989900 |
| Q5VW32 | Q5VW32 | BRO1 domain-containing protein BROX                        | BROX     | sp Q5VW32 | 5  | 5  | 5  | 0  | 5  | 0  | 5  | 0 | 5  | 0  | 5  | 0  | 5  | 0  | 5  | 23.6  | 46.476   | 0      | 15.998   | 419510000 | 0         | 1.82E+08 | 0        | 2.37E+08  | 0        | 16872000 | 0        | 8961600   |         |
| O00743 | O00743 | Serine/threonine-protein phosphatase 6 catalytic PPP6C     | PPP6C    | sp O00743 | 6  | 6  | 6  | 0  | 5  | 3  | 6  | 0 | 5  | 3  | 6  | 0  | 5  | 3  | 6  | 24.3  | 35.144   | 0      | 19.594   | 419040000 | 0         | 1.44E+08 | 8794400  | 2.67E+08  | 0        | 9752000  | 7568700  | 11875000  |         |
| O75122 | O75122 | CLIP-associating protein 2                                 | CLASP2   | sp O75122 | 14 | 14 | 14 | 12 | 7  | 6  | 14 | 0 | 7  | 6  | 14 | 0  | 7  | 6  | 14 | 51.45 | 41842000 | 0      | 80550000 | 10513000  | 2.27E+08  | 0        | 1.44E+08 | 10513000  | 3.27E+08 | 0        | 8147600  | 1066000   | 8874500 |
| Q9P1F3 | Q9P1F3 | Costars family protein ABRACL                              | ABRACL   | sp Q9P1F3 | 1  | 1  | 1  | 0  | 1  | 0  | 1  | 0 | 1  | 0  | 1  | 0  | 1  | 0  | 1  | 19.8  | 9.0564   | 0      | 6.5244   | 418290000 | 0         | 1.22E+08 | 0        | 2.9E+08   | 0        | 10761000 | 0        | 12182000  |         |
| O53T59 | O53T59 | HCL15-binding protein 3                                    | HS1BP3   | sp O53T59 | 5  | 5  | 5  | 0  | 4  | 0  | 5  | 0 | 4  | 0  | 5  | 0  | 4  | 0  | 5  | 23.5  | 42.78    | 0      | 59.702   | 417600000 | 0         | 3.3E+08  | 0        | 3.6E+08   | 0        | 10669000 | 0        | 12384000  |         |
| Q99538 | Q99538 | Legumain                                                   | LGMN     | sp Q99538 | 2  | 2  | 2  | 0  | 1  | 1  | 2  | 0 | 1  | 1  | 2  | 0  | 1  | 1  | 2  | 6.5   | 49.411   | 0      | 7.497    | 417410000 | 0         | 33040000 | 2037400  | 8.32E+08  | 0        | 6473400  | 4438400  | 9093300   |         |
| Q96B7C | Q96B7C | Dedicator of cytokinesis protein 10                        | DOCK10   | sp Q96B7C | 17 | 17 | 17 | 1  | 0  | 1  | 17 | 1 | 0  | 1  | 17 | 1  | 0  | 1  | 17 | 11.3  | 249.53   | 0      | 106.53   | 417390000 | 455100    | 0        | 441070   | 4.17E+08  | 271810   | 0        | 219350   | 17389000  | 0       |
| Q9Y388 | Q9Y388 | Oligoribonuclease, mitochondrial                           | REX02    | sp Q9Y388 | 3  | 3  | 3  | 0  | 3  | 1  | 2  | 0 | 3  | 1  | 2  | 0  | 3  | 1  | 2  | 15.2  | 26.832   | 0      | 11.197   | 417390000 | 0         | 1.77E+08 | 924900   | 2.39E+08  | 0        | 16699000 | 2795800  | 6579700   |         |
| P18858 | P18858 | DNA ligase 1                                               | LIG1     | sp P18858 | 14 | 14 | 14 | 0  | 13 | 0  | 11 | 0 | 13 | 0  | 11 | 0  | 13 | 0  | 11 | 22.2  | 101.73   | 0      | 34.498   | 417240000 | 0         | 2.23E+08 | 0        | 1.94E+08  | 0        | 18481000 | 0        | 9193000   |         |
| Q08AF3 | Q08AF3 | Schlafen family member 5                                   | SLFN5    | sp Q08AF3 | 12 | 12 | 12 | 0  | 7  | 12 | 0  | 7 | 12 | 0  | 7  | 12 | 0  | 7  | 12 | 15.7  | 101.05   | 0      | 28.996   | 415960000 | 0         | 870850   | 25745000 | 3.89E+08  | 0        | 347370   | 5692600  | 27350000  |         |
| O43290 | O43290 | U4/U6,U5 tri-snRNP-associated protein 1                    | SART1    | sp O43290 | 14 | 14 | 14 | 1  | 10 | 11 | 9  | 1 | 10 | 11 | 9  | 1  | 10 | 11 | 9  | 28    | 20.254   | 0      | 40.032   | 415690000 | 2069700   | 9887700  | 68816000 | 2.46E+08  | 2897900  | 7637200  | 9122000  | 7486400   |         |
| Q01469 | Q01469 | Fatty acyl-binding protein, epidermal                      | FABP5    | sp Q01469 | 3  | 3  | 3  | 0  | 3  | 3  | 3  | 0 | 3  | 3  | 3  | 0  | 3  | 3  | 3  | 20.7  | 15.164   | 0      | 8.4771   | 415110000 | 0         | 2.04E+08 | 3545000  | 1.76E+08  | 0        | 21014000 | 20335000 | 7497700   |         |
| Q9GZ53 | Q9GZ53 | WD repeat-containing protein G1;WD repeat-cont             | WDR61    | sp Q9GZ53 | 4  | 4  | 4  | 0  | 4  | 1  | 3  | 0 | 4  | 1  | 3  | 0  | 4  | 1  | 3  | 28.3  | 33.58    | 0      | 45.313   | 414510000 | 0         | 2.26E+08 | 640500   | 1.82E+08  | 0        | 14602000 | 5985700  | 11109000  |         |
| Q9P210 | Q9P210 | Cleavage and polyadenylation specificity factor subunit 2  | PSF2     | sp Q9P210 | 9  | 9  | 9  | 1  | 3  | 1  | 9  | 1 | 3  | 1  | 9  | 1  | 3  | 1  | 9  | 21    | 88.486   | 0      | 40.456   | 414220000 | 1308600   | 2580000  | 896240   | 3.86E+08  | 1322100  | 2742700  | 896930   | 15107000  |         |
| Q8WYA6 | Q8WYA6 | Beta-catenin-like protein 1                                | CTNBL1   | sp Q8WYA6 | 9  | 9  | 9  | 0  | 7  | 2  | 9  | 0 | 7  | 2  | 9  | 0  | 7  | 2  | 9  | 18.7  | 65.173   | 0      | 50.827   | 413770000 | 0         | 1.68E+08 | 8915800  | 2.37E+08  | 0        | 10455000 | 10283000 | 9801300   |         |
| Q9Y2X3 | Q9Y2X3 | Nucleolar protein 58                                       | NOP58    | sp Q9Y2X3 | 10 | 10 | 10 | 1  | 6  | 8  | 9  | 1 | 6  | 8  | 9  | 1  | 6  | 8  | 9  | 25.7  | 59.578   | 0      | 29.311   | 413700000 | 1124800   | 3296000  | 43577000 | 3.36E+08  | 1606800  | 3421000  | 35366000 | 6570000   |         |
| Q6ZRP7 | Q6ZRP7 | Sulphydryl oxidase 2                                       | QSOX2    | sp Q6ZRP7 | 5  | 5  | 5  | 0  | 5  | 0  | 5  | 0 | 5  | 0  | 5  | 0  | 5  | 0  | 5  | 8.6   | 77.528   | 0      | 26.281   | 413670000 | 0         | 29474000 | 0        | 3.84E+08  | 0        | 3221400  | 0        | 15177000  |         |
| Q13671 | Q13671 | Ras and Rab interactor 1                                   | RMI1     | sp Q13671 | 11 | 11 | 11 | 0  | 6  | 11 | 0  | 6 | 11 | 0  | 6  | 11 | 0  | 6  | 11 | 20.3  | 84.098   | 0      | 43.16    | 413180000 | 0         | 4185800  | 8571700  | 4E+08     | 0        | 7439900  | 14788000 | 0         |         |
| Q08378 | Q08378 | Golgin subfamily A member 3                                | GOLGA3   | sp Q08378 | 20 | 20 | 20 | 1  | 15 | 2  | 18 | 1 | 15 | 2  | 18 | 1  | 15 | 2  | 18 | 18.5  | 167.35   | 0      | 61.13    | 413040000 | 493820    | 1.29E+08 | 2231     |           |          |          |          |           |         |

|           |           |                                                                |          |           |    |    |    |   |    |    |    |    |    |    |      |        |        |        |           |           |           |          |           |           |          |          |           |           |         |
|-----------|-----------|----------------------------------------------------------------|----------|-----------|----|----|----|---|----|----|----|----|----|----|------|--------|--------|--------|-----------|-----------|-----------|----------|-----------|-----------|----------|----------|-----------|-----------|---------|
| P14927    | P14927    | Cytochrome b-c1 complex subunit 7                              | UQCRCB   | sp P14927 | 4  | 4  | 4  | 1 | 4  | 1  | 3  | 1  | 4  | 1  | 3    | 38.7   | 13.53  | 0      | 17.006    | 386690000 | 2306100   | 2.28E+08 | 897370    | 1.55E+08  | 2912200  | 21775000 | 811030    | 3904900   |         |
| P33121    | P33121    | Long-chain-fatty-acid-CoA ligase 1                             | ACS1L1   | sp P33121 | 11 | 11 | 0  | 6 | 1  | 11 | 0  | 6  | 1  | 11 | 17.9 | 77.942 | 0      | 34.758 | 386230000 | 0         | 43752000  | 500810   | 3.42E+08  | 0         | 3570000  | 6403000  | 1047000   | 11367000  |         |
| P33111    | Q96E11    | Ribosome-recycling factor, mitochondrial                       | MRRF     | sp Q96E11 | 5  | 5  | 1  | 4 | 0  | 5  | 1  | 4  | 0  | 5  | 26.7 | 29.277 | 0      | 33.361 | 385970000 | 0         | 1.81E+08  | 10129000 | 1.95E+08  | 0         | 10370000 | 14192000 | 5582800   | 80958000  |         |
| P52732    | P52732    | Kinesin-like protein KIF11                                     | KIF11    | sp P52732 | 9  | 9  | 2  | 9 | 0  | 6  | 2  | 9  | 0  | 6  | 10.9 | 119.16 | 0      | 21.766 | 384080000 | 6011500   | 2.33E+08  | 0        | 1.45E+08  | 7850900   | 16562000 | 0        | 8095800   |           |         |
| Q81X04    | Q81X04    | Ubiquitin-conjugating enzyme E2 variant 3                      | UEVLD    | sp Q81X04 | 6  | 6  | 6  | 2 | 1  | 6  | 0  | 2  | 1  | 6  | 15.3 | 52.263 | 0      | 7.6721 | 383990000 | 0         | 1.53E+08  | 987950   | 2.3E+08   | 0         | 16301000 | 1387200  | 5908800   |           |         |
| Q9Y315    | Q9Y315    | Deoxyribose-phosphate aldolase                                 | DERA     | sp Q9Y315 | 5  | 5  | 2  | 5 | 3  | 5  | 2  | 5  | 3  | 5  | 23.6 | 35.23  | 0      | 24.499 | 383270000 | 73076000  | 1.1E+08   | 9815000  | 1.91E+08  | 63868000  | 13130000 | 11855000 | 8328000   |           |         |
| Q96GA7    | Q96GA7    | Serine dehydratase-like                                        | SDSL     | sp Q96GA7 | 4  | 4  | 4  | 1 | 3  | 0  | 4  | 1  | 3  | 0  | 20.1 | 34.674 | 0      | 43.711 | 382970000 | 819060    | 31393000  | 0        | 3.51E+08  | 5667000   | 2165500  | 0        | 10179000  |           |         |
| Q96D85    | Q96D85    | Regulator of microtubule dynamics protein 1                    | RMDN1    | sp Q96D85 | 8  | 8  | 8  | 0 | 8  | 0  | 8  | 0  | 8  | 0  | 6    | 27.7   | 35.808 | 0      | 47.437    | 381910000 | 0         | 1.9E+08  | 0         | 1.92E+08  | 0        | 13793000 | 0         | 10831000  |         |
| Q01581;P0 | Q01581    | Hydroxymethylglutaryl-CoA synthase, cytoplasmic                | HMGCS1   | sp Q01581 | 10 | 10 | 10 | 0 | 8  | 0  | 10 | 0  | 8  | 0  | 10   | 27.5   | 57.293 | 0      | 31.538    | 381280000 | 0         | 1.09E+08 | 0         | 2.72E+08  | 0        | 10762000 | 0         | 10045000  |         |
| P30740    | P30740    | Leukocyte elastase inhibitor                                   | SERPINB1 | sp P30740 | 8  | 8  | 0  | 7 | 0  | 8  | 0  | 7  | 0  | 8  | 30.3 | 42.741 | 0      | 40.571 | 380330000 | 0         | 95361000  | 0        | 1.85E+08  | 0         | 8758200  | 0        | 11367000  |           |         |
| Q76031    | Q76031    | ATP-dependent GTP-protease ATP-binding subunit CLPX            | CLPX     | sp Q76031 | 11 | 11 | 1  | 9 | 1  | 10 | 1  | 9  | 1  | 10 | 25.3 | 69.223 | 0      | 33.292 | 379990000 | 1955500   | 1.42E+08  | 1804000  | 2.35E+08  | 3345000   | 11356000 | 1727300  | 8871200   |           |         |
| Q8BTU6    | Q8BTU6    | Phosphatidylinositol 4-kinase type 2-alpha                     | PI4K2A   | sp Q8BTU6 | 14 | 14 | 1  | 9 | 1  | 0  | 12 | 0  | 12 | 0  | 42   | 54.022 | 0      | 33.066 | 379690000 | 0         | 60325000  | 0        | 1.89E+08  | 0         | 8167000  | 0        | 12265000  |           |         |
| Q5JWF2;P  | Q5JWF2    | Guanine nucleotide-binding protein (G) subunit: iGNAS          | GNAS     | sp Q5JWF2 | 8  | 7  | 7  | 1 | 7  | 6  | 7  | 1  | 6  | 5  | 6    | 8.6    | 111.02 | 0      | 21.656    | 379450000 | 13488000  | 98338000 | 15090000  | 2.53E+08  | 11613000 | 14194000 | 7955000   | 9280500   |         |
| Q9Y371    | Q9Y371    | Endophilin-81                                                  | SH3GLB1  | sp Q9Y371 | 6  | 6  | 0  | 4 | 0  | 5  | 0  | 4  | 0  | 5  | 24.7 | 40.796 | 0      | 32.548 | 379160000 | 0         | 1.73E+08  | 0        | 2.06E+08  | 0         | 16787000 | 0        | 6958700   |           |         |
| Q9NW13    | Q9NW13    | RNA-binding protein 28                                         | RBM28    | sp Q9NW13 | 12 | 12 | 12 | 0 | 7  | 10 | 10 | 0  | 7  | 10 | 20.6 | 85.737 | 0      | 35.535 | 378510000 | 0         | 44986000  | 59384000 | 2.74E+08  | 0         | 516200   | 40002000 | 10037000  |           |         |
| P46976    | P46976    | Glycogenin-1                                                   | GYG1     | sp P46976 | 6  | 6  | 6  | 0 | 5  | 3  | 6  | 0  | 5  | 3  | 6    | 16.3   | 39.383 | 0      | 22.995    | 378460000 | 0         | 1.47E+08 | 31475000  | 2E+08     | 0        | 12964000 | 22096000  | 7258100   |         |
| Q9Y5P6    | Q9Y5P6    | Mannose-1-phosphate guanylyltransferase beta                   | GMPPB    | sp Q9Y5P6 | 7  | 7  | 7  | 0 | 3  | 0  | 7  | 0  | 3  | 0  | 7    | 30     | 39.834 | 0      | 22.401    | 378390000 | 0         | 87304000 | 0         | 2.91E+08  | 0        | 8975800  | 0         | 10691000  |         |
| P50579    | P50579    | Methionine aminopeptidase 2                                    | METAP2   | sp P50579 | 7  | 7  | 7  | 2 | 6  | 7  | 2  | 6  | 7  | 0  | 7    | 22.8   | 52.891 | 0      | 54.617    | 378070000 | 0         | 2.28E+08 | 1491000   | 1.48E+08  | 0        | 16925000 | 3616600   | 10269000  |         |
| Q5T6V5    | Q5T6V5    | UPF0553 protein C9orf64                                        | C9orf64  | sp Q5T6V5 | 8  | 8  | 8  | 0 | 7  | 0  | 7  | 0  | 7  | 0  | 7    | 25.2   | 39.028 | 0      | 20.09     | 378040000 | 0         | 1.33E+08 | 0         | 2.45E+08  | 0        | 12284000 | 0         | 9537000   |         |
| Q8WX92    | Q8WX92    | Negative elongation factor B                                   | NELFB    | sp Q8WX92 | 7  | 7  | 7  | 0 | 6  | 1  | 4  | 0  | 6  | 1  | 4    | 18.3   | 65.697 | 0      | 20.183    | 378020000 | 0         | 1.49E+08 | 573690    | 2.28E+08  | 0        | 18139000 | 911440    | 3886700   |         |
| Q9UI30    | Q9UI30    | Multifunctional methyltransferase subunit TRM112               | TRM112   | sp Q9UI30 | 4  | 4  | 4  | 0 | 3  | 2  | 4  | 0  | 3  | 2  | 4    | 37.6   | 14.199 | 0      | 23.958    | 377670000 | 0         | 51623000 | 4257600   | 3.22E+08  | 0        | 4782200  | 4732000   | 11132000  |         |
| Q92609    | Q92609    | TBC1 domain family member 5                                    | TBC1D5   | sp Q92609 | 9  | 9  | 9  | 0 | 4  | 9  | 0  | 4  | 9  | 0  | 9    | 22.8   | 89.003 | 0      | 52.441    | 377400000 | 0         | 14625000 | 6245600   | 3.57E+08  | 0        | 3773400  | 507900    | 11347000  |         |
| Q9H8Y8;Q  | Q9H8Y8    | Golgi reassembly-stacking protein 2                            | GORASP2  | sp Q9H8Y8 | 6  | 6  | 6  | 0 | 6  | 0  | 6  | 0  | 6  | 0  | 5    | 22.8   | 47.145 | 0      | 21.039    | 376450000 | 0         | 1.45E+08 | 0         | 2.32E+08  | 0        | 86311000 | 22355000  | 9092500   |         |
| Q4KMP7    | Q4KMP7    | TBC1 domain family member 10B                                  | TBC1D10B | sp Q4KMP7 | 10 | 10 | 10 | 0 | 8  | 8  | 10 | 0  | 8  | 8  | 10   | 23.8   | 87.198 | 0      | 28.295    | 375920000 | 0         | 99929000 | 32365000  | 2.44E+08  | 0        | 18317000 | 22355000  | 9619000   |         |
| PC0CL4;P0 | PC0CL4;P0 | Complement C4-A;Complement C4 beta chain;C4A                   | C4A;C4B  | sp PC0CL4 | 7  | 4  | 4  | 3 | 0  | 4  | 3  | 0  | 4  | 3  | 0    | 5.6    | 192.78 | 0      | 27.27     | 375840000 | 2.15E+08  | 0        | 160500000 | 0         | 1.7E+08  | 0        | 152800000 | 0         | 0       |
| Q13042    | Q13042    | Cell division cycle protein 16 homolog                         | CDC16    | sp Q13042 | 12 | 12 | 12 | 0 | 2  | 12 | 3  | 0  | 2  | 12 | 3    | 34.2   | 71.655 | 0      | 38.079    | 375580000 | 0         | 12958000 | 302680000 | 59947000  | 0        | 812820   | 19939000  | 1718700   |         |
| P50583    | P50583    | Bic5-nucleosyl)-tetrahydrophosphate [asymmetrical]             | NUDT7    | sp P50583 | 2  | 2  | 2  | 0 | 2  | 0  | 2  | 0  | 2  | 0  | 2    | 23.1   | 16.829 | 0      | 15.028    | 375090000 | 0         | 44126000 | 0         | 3.31E+08  | 0        | 5524100  | 0         | 11977000  |         |
| Q5UIP0    | Q5UIP0    | Telomere-associated protein RIF1                               | RIF1     | sp Q5UIP0 | 11 | 11 | 11 | 0 | 10 | 5  | 6  | 0  | 10 | 5  | 6    | 6.3    | 274.46 | 0      | 30.283    | 374590000 | 0         | 1.66E+08 | 26551000  | 1.82E+08  | 0        | 9831000  | 23639900  | 6480500   |         |
| Q8NFH4    | Q8NFH4    | Nucleoporin Nup37                                              | NUP37    | sp Q8NFH4 | 4  | 4  | 4  | 0 | 3  | 0  | 4  | 0  | 3  | 0  | 4    | 14.1   | 36.707 | 0      | 12.829    | 373640000 | 0         | 26769000 | 0         | 3.47E+08  | 0        | 3679400  | 0         | 12945000  |         |
| P26440    | P26440    | Isovaleryl-CoA dehydrogenase, mitochondrial                    | IVD      | sp P26440 | 9  | 9  | 9  | 0 | 8  | 1  | 8  | 0  | 8  | 1  | 8    | 31.9   | 46.65  | 0      | 55.463    | 373500000 | 0         | 1.51E+08 | 1000300   | 2.21E+08  | 0        | 11272000 | 0         | 10275000  |         |
| Q32P41    | Q32P41    | RNA [guanine(37)-N1]-methyltransferase                         | TRMT5    | sp Q32P41 | 7  | 7  | 7  | 0 | 4  | 0  | 7  | 0  | 4  | 0  | 7    | 22.2   | 58.246 | 0      | 34.835    | 373420000 | 0         | 48879000 | 0         | 3.25E+08  | 0        | 6890800  | 0         | 10765000  |         |
| O43488;Q  | O43488    | Aflatoxin B1 aldehyde reductase member 2                       | AKR7A2   | sp O43488 | 6  | 6  | 6  | 0 | 6  | 0  | 4  | 0  | 6  | 0  | 4    | 14.5   | 39.589 | 0      | 22.507    | 373060000 | 0         | 1.26E+08 | 0         | 1.47E+08  | 0        | 11204000 | 0         | 10067000  |         |
| Q9BTE7;Q  | Q9BTE7    | DCN1-like protein 5                                            | DCUN1D5  | sp Q9BTE7 | 7  | 7  | 7  | 1 | 5  | 0  | 7  | 1  | 5  | 0  | 7    | 32.5   | 27.508 | 0      | 29.17     | 372960000 | 0         | 2.51E+08 | 3967200   | 1.18E+08  | 0        | 22215000 | 3882500   | 3568200   |         |
| P68402    | P68402    | Platelet-activating factor acetylhydrolase IB subunit PAFAH1B2 | PAFAH1B2 | sp P68402 | 2  | 2  | 2  | 0 | 2  | 0  | 2  | 0  | 2  | 0  | 2    | 12.2   | 25.569 | 0      | 23.664    | 372230000 | 0         | 2.78E+08 | 0         | 93796000  | 0        | 24928000 | 0         | 3472900   |         |
| P10619    | P10619    | Lysosomal protective protein;Lysosomal protectin CTSA          | CTSA     | sp P10619 | 4  | 4  | 4  | 0 | 3  | 3  | 4  | 0  | 3  | 3  | 4    | 9.4    | 54.465 | 0      | 9.9129    | 371910000 | 0         | 18333000 | 14089000  | 3.39E+08  | 0        | 1947700  | 9618300   | 13481000  |         |
| P30876    | P30876    | DNA-directed RNA polymerase II subunit RPB2                    | POLR2B   | sp P30876 | 12 | 12 | 12 | 0 | 6  | 8  | 11 | 0  | 6  | 8  | 11   | 13.4   | 133.9  | 0      | 42.242    | 371910000 | 0         | 48894000 | 18031000  | 3.05E+08  | 0        | 5034600  | 14889000  | 9046300   |         |
| A6ND36    | A6ND36    | Protein FAM83G                                                 | FAM83G   | sp A6ND36 | 15 | 15 | 15 | 0 | 15 | 3  | 0  | 15 | 3  | 0  | 15   | 3      | 20.8   | 90.834 | 0         | 36.366    | 371690000 | 1.94E+08 | 0         | 155690000 | 21664000 | 67497000 | 0         | 222230000 | 5648400 |
| Q8N335    | Q8N335    | Glycerol-3-phosphate dehydrogenase 1-like prote                | GDPL1    | sp Q8N335 | 7  | 7  | 7  | 0 | 6  | 0  | 5  | 0  | 6  | 0  | 5    | 26.5   | 38.418 | 0      | 15.586    | 371640000 | 0         | 1.18E+08 | 0         | 2.53E+08  | 0        | 13232000 | 0         | 7616600   |         |
| Q9P003    | Q9P003    | Protein cornichon homolog 4                                    | CNIH4    | sp Q9P003 | 1  | 1  | 1  | 1 | 1  | 1  | 1  | 1  | 1  | 1  | 1    | 14.4   | 16.093 | 0      | 9.7147    | 371040000 | 0         | 1.01E+08 | 4629600   | 2.65E+08  | 0        | 8939600  | 3111100   | 1089800   |         |
| Q81WX8    | Q81WX8    | Calcium homeostasis endoplasmic reticulum prot                 | CHERP    | sp Q81WX8 | 10 | 10 | 10 | 0 | 10 | 4  | 6  | 0  | 10 | 4  | 6    | 15.7   | 103.7  | 0      | 26.172    | 370580000 | 0         | 2.23E+08 | 15861000  | 1.32E+08  | 0        | 13072000 | 15047000  | 6230100   |         |
| Q11349    | Q11349    | Golgin subfamily A member 4                                    | GOLGA4   | sp Q11349 | 18 | 18 | 18 | 1 | 4  | 1  | 18 | 1  | 4  | 1  | 18   | 10.4   | 261.14 | 0      | 60.103    | 370350000 | 38857000  | 16167000 | 472310    | 3.5E+08   | 1846300  | 1681800  | 527690    | 19599000  |         |
| Q9UL63    | Q9UL63    | Muskelin                                                       | MKLN1    | sp Q9UL63 | 8  | 8  | 8  | 1 | 2  | 2  | 8  | 1  | 2  | 2  | 8    | 19.5   | 84.767 | 0      | 85.541    | 370160000 | 1528200   | 19521000 | 3991400   | 3.45E+08  | 1303500  | 800110   | 2833100   | 15188000  |         |
| P46734    | P46734    | Dual specific tyrosine mitogen-activated protein kinase        | MAP2K3   | sp P46734 | 6  | 6  | 6  | 5 | 4  | 1  | 6  | 0  | 4  | 1  | 6    | 23.9   | 39.318 | 0      | 23.96     | 370110000 | 0         | 37627000 | 652940    | 3.32E+08  | 0        | 2286800  | 624310    | 14491000  |         |
| Q9BYC4    | Q9BYC4    | Protein PBD1                                                   | PBD1     | sp Q9BYC4 | 6  | 6  | 6  | 0 | 5  | 2  | 6  | 0  | 5  | 2  | 6    | 42.9   | 26.056 | 0      | 38.307    | 370110000 | 0         | 98796000 | 855040    | 2.7E+08   | 0        | 11718000 | 1466300   | 7327400   |         |
| Q00169    | Q00169    | Phosphatidylinositol transfer protein alpha isoform            | PITPNA   | sp Q00169 | 6  | 6  | 6  | 0 | 6  | 0  | 5  | 0  | 6  | 0  | 5    | 29.3   | 31.806 | 0      | 57.192    | 368940000 | 0         | 1.61E+08 | 0         | 2.08E+08  | 0        | 12764000 | 0         | 9997500   |         |
| Q9NXR7    | Q9NXR7    | BRC4-A complex subunit BRE                                     | BRE      | sp Q9NXR7 | 5  | 5  | 5  | 0 | 4  | 0  | 5  | 0  | 4  | 0  | 5    | 23     | 43.551 | 0      | 39.811    | 368930000 | 0         | 1.56E+08 | 0         | 2.13E+08  | 0        | 13539000 | 0         | 8925000   |         |
| Q9P015    | Q9P015    | 39S ribosomal protein L15, mitochondrial                       | MRPL15   | sp Q9P015 | 6  | 6  | 6  | 1 | 4  | 3  | 6  | 1  | 4  | 3  | 6    | 26.7   | 33.419 | 0      | 12.256    | 368600000 | 1041800   | 97653000 | 9919000   |           |          |          |           |           |         |

|           |           |                                                        |            |           |    |    |    |   |    |    |    |    |    |    |    |      |        |           |          |           |           |           |          |          |          |          |          |          |          |         |
|-----------|-----------|--------------------------------------------------------|------------|-----------|----|----|----|---|----|----|----|----|----|----|----|------|--------|-----------|----------|-----------|-----------|-----------|----------|----------|----------|----------|----------|----------|----------|---------|
| Q9BZF1    | Q9BZF1    | Oxysterol-binding protein-related protein 8            | OSBPL8     | sp Q9BZF1 | 6  | 6  | 6  | 0 | 6  | 2  | 6  | 0  | 6  | 2  | 6  | 9.9  | 101.19 | 0         | 22.588   | 354000000 | 0         | 97571000  | 4093100  | 2.52E+08 | 0        | 8229700  | 3610400  | 9889900  |          |         |
| Q14181    | Q14181    | DNA polymerase alpha subunit B                         | POLA2      | sp Q14181 | 5  | 5  | 5  | 0 | 5  | 0  | 3  | 0  | 5  | 0  | 3  | 12.2 | 65.947 | 0         | 18.478   | 353870000 | 0         | 1.8E+08   | 0        | 1.74E+08 | 0        | 14830000 | 0        | 8172600  |          |         |
| Q9B4V4    | Q9B4V4    | THUMP domain-containing protein 3                      | THUMPD3    | sp Q9B4V4 | 5  | 5  | 5  | 0 | 2  | 1  | 5  | 0  | 2  | 1  | 5  | 12.8 | 57.002 | 0         | 18.802   | 353860000 | 0         | 27583000  | 2669600  | 3.24E+08 | 0        | 3764400  | 2593500  | 11176000 |          |         |
| P63167;Q6 | P63167;Q6 | Dynein light chain 1, cytoplasmic;Dynein light chain 1 | DYLL1L1;D1 | sp P63167 | 2  | 2  | 2  | 1 | 2  | 2  | 2  | 1  | 2  | 2  | 2  | 37.1 | 10.366 | 0         | 23.171   | 353500000 | 17588000  | 49024000  | 7900200  | 2.79E+08 | 27922000 | 2106900  | 2917900  | 5744700  |          |         |
| Q8N127    | Q8N127    | THO complex subunit 4                                  | THOC2      | sp Q8N127 | 10 | 10 | 10 | 0 | 10 | 4  | 10 | 4  | 10 | 4  | 10 | 4    | 5      | 6.5       | 18.277   | 0         | 19.901    | 352960000 | 0        | 2E+08    | 0        | 1.46E+08 | 0        | 16335000 | 6470100  | 5509700 |
| Q9Y312    | Q9Y312    | Protein AAR2 homolog                                   | AAR2       | sp Q9Y312 | 5  | 5  | 5  | 0 | 5  | 2  | 3  | 0  | 5  | 2  | 3  | 21.4 | 43.472 | 0         | 25.276   | 352830000 | 0         | 91458000  | 7335500  | 2.54E+08 | 0        | 5475400  | 5848300  | 12115000 |          |         |
| Q9NRY5    | Q9NRY5    | Protein FAM114A2                                       | FAM114A2   | sp Q9NRY5 | 6  | 6  | 6  | 0 | 5  | 0  | 5  | 0  | 5  | 0  | 5  | 5    | 18.6   | 55.468    | 0        | 43.147    | 352800000 | 0         | 86239000 | 0        | 2.67E+08 | 0        | 8904500  | 0        | 9660000  |         |
| Q9BRK5    | Q9BRK5    | 45 kDa calcium-binding protein                         | SDF4       | sp Q9BRK5 | 5  | 5  | 5  | 0 | 4  | 4  | 5  | 0  | 4  | 4  | 5  | 21.3 | 41.806 | 0         | 14.766   | 352710000 | 0         | 35022000  | 16799000 | 3.01E+08 | 0        | 8485900  | 8449900  | 9814800  |          |         |
| Q9Y3L5    | Q9Y3L5    | Ras-related protein Rap-2c                             | RAP2C      | sp Q9Y3L5 | 3  | 3  | 3  | 0 | 2  | 0  | 3  | 0  | 2  | 0  | 3  | 2    | 25.7   | 20.745    | 0        | 128.56    | 352440000 | 0         | 44728000 | 0        | 3.08E+08 | 0        | 8212600  | 0        | 8385000  |         |
| Q75223    | Q75223    | Gamma-glutamylcystyltransferase                        | GGCT       | sp Q75223 | 5  | 5  | 5  | 0 | 4  | 4  | 4  | 4  | 4  | 4  | 4  | 38.3 | 21.007 | 4992400   | 38.3     | 37.1      | 352380000 | 0         | 1.86E+08 | 48795000 | 1.12E+08 | 7259600  | 20199000 | 25933000 | 5427700  |         |
| P63279    | P63279    | SUMO1-conjugating enzyme UBCE9                         | UBCE1      | sp P63279 | 4  | 4  | 4  | 0 | 4  | 0  | 4  | 0  | 4  | 0  | 4  | 22.8 | 18.007 | 0         | 10.026   | 352000000 | 0         | 2.1E+08   | 0        | 1.42E+08 | 0        | 18834000 | 0        | 5533400  |          |         |
| Q27AL8    | Q27AL8    | Glutamine-rich protein 7                               | QRICH1     | sp Q27AL8 | 7  | 7  | 7  | 0 | 6  | 0  | 6  | 0  | 6  | 0  | 6  | 16.4 | 86.435 | 0         | 24.804   | 351510000 | 0         | 1.46E+08  | 0        | 2.06E+08 | 0        | 1174000  | 0        | 10144000 |          |         |
| Q9NQ50    | Q9NQ50    | 39S ribosomal protein L40, mitochondrial               | MRPL40     | sp Q9NQ50 | 3  | 3  | 3  | 0 | 3  | 2  | 2  | 0  | 3  | 2  | 2  | 25.7 | 24.49  | 0         | 20.081   | 351320000 | 0         | 1.92E+08  | 11249000 | 1.48E+08 | 0        | 12840000 | 6182800  | 10305000 |          |         |
| P24928    | P24928    | DNA-directed RNA polymerase II subunit RPB1            | POLR2A     | sp P24928 | 14 | 14 | 14 | 2 | 5  | 2  | 14 | 2  | 5  | 2  | 14 | 12.3 | 21.17  | 0         | 40.883   | 350190000 | 1638100   | 28080000  | 1779400  | 3.19E+08 | 1245100  | 2079100  | 1063800  | 14028000 |          |         |
| Q5TRP6    | Q5TRP6    | RNA-binding protein 26                                 | RBM26      | sp Q5TRP6 | 12 | 12 | 11 | 4 | 11 | 5  | 9  | 4  | 11 | 5  | 9  | 4    | 8      | 12.9      | 113.6    | 0         | 28.408    | 349310000 | 6202400  | 1.92E+08 | 6320100  | 1.44E+08 | 6186200  | 17805000 | 4490400  | 4862900 |
| Q9Y6E0    | Q9Y6E0    | Serine/threonine protein kinase 24;Serine/threor       | STK24      | sp Q9Y6E0 | 10 | 4  | 4  | 1 | 9  | 3  | 10 | 1  | 4  | 1  | 4  | 21.2 | 49.307 | 0         | 14.511   | 348100000 | 4824800   | 58188000  | 907360   | 2.84E+08 | 8869900  | 1345600  | 1232300  | 8126400  |          |         |
| Q01433    | Q01433    | AMP deaminase 2                                        | AMPD2      | sp Q01433 | 9  | 9  | 9  | 0 | 5  | 7  | 9  | 0  | 5  | 7  | 9  | 12.4 | 100.69 | 0         | 26.497   | 347780000 | 0         | 71468000  | 15920000 | 2.6E+08  | 0        | 5993600  | 14365000 | 7161700  |          |         |
| Q969G5    | Q969G5    | Protein kinase C delta-binding protein                 | PRKCDBP    | sp Q969G5 | 8  | 8  | 8  | 0 | 1  | 6  | 8  | 0  | 1  | 6  | 8  | 31   | 27.701 | 0         | 33.237   | 347540000 | 0         | 2399700   | 37286000 | 3.0E+08  | 0        | 1085100  | 1312900  | 23714000 |          |         |
| P61006;Q6 | P61006;Q6 | Ras-related protein Rab-8A                             | RAB8A      | sp P61006 | 6  | 4  | 3  | 0 | 4  | 2  | 6  | 0  | 3  | 1  | 3  | 35.7 | 23.668 | 0         | 35.242   | 346850000 | 0         | 1.3E+08   | 1586800  | 2.16E+08 | 0        | 8847900  | 2929800  | 9588700  |          |         |
| Q7Z4W1    | Q7Z4W1    | L-xylulose reductase                                   | DXR        | sp Q7Z4W1 | 6  | 6  | 6  | 0 | 6  | 0  | 6  | 0  | 6  | 0  | 6  | 4    | 31.1   | 25.913    | 0        | 44.618    | 346600000 | 0         | 2.51E+08 | 0        | 95521000 | 0        | 20236000 | 0        | 5824800  |         |
| Q16880    | Q16880    | 2-hydroxyacylphosphine 1-beta-galactosyltransf         | UGT8       | sp Q16880 | 4  | 4  | 4  | 0 | 1  | 3  | 4  | 0  | 1  | 3  | 4  | 8.9  | 61.437 | 0         | 17.443   | 346440000 | 0         | 2772900   | 7767800  | 3.36E+08 | 0        | 1022600  | 3648300  | 14427000 |          |         |
| Q9BRJ2    | Q9BRJ2    | 39S ribosomal protein L45, mitochondrial               | MRPL45     | sp Q9BRJ2 | 5  | 5  | 5  | 0 | 3  | 3  | 4  | 0  | 3  | 3  | 4  | 26.5 | 35.351 | 0         | 13.516   | 345630000 | 0         | 78756000  | 8351700  | 2.59E+08 | 0        | 9340200  | 4720700  | 9125700  |          |         |
| Q71RC2    | Q71RC2    | La-related protein 4                                   | LARP4      | sp Q71RC2 | 6  | 6  | 6  | 1 | 5  | 4  | 6  | 1  | 5  | 4  | 6  | 14.2 | 80.595 | 0         | 33.377   | 345160000 | 1596700   | 78154000  | 19095000 | 2.46E+08 | 5992700  | 4693900  | 12442000 | 8318900  |          |         |
| Q96GC9    | Q96GC9    | Vacuole membrane protein 1                             | VMP1       | sp Q96GC9 | 2  | 2  | 2  | 0 | 1  | 2  | 0  | 1  | 2  | 0  | 1  | 2    | 9.1    | 46.237    | 0        | 42.151    | 344770000 | 0         | 88290000 | 9581300  | 2.47E+08 | 0        | 7659900  | 7676600  | 9042800  |         |
| Q43447    | Q43447    | Peptidyl-prolyl cis-trans isomerase H                  | PPH        | sp Q43447 | 6  | 6  | 6  | 0 | 6  | 1  | 4  | 0  | 6  | 1  | 4  | 37.9 | 19.208 | 0         | 26.319   | 344680000 | 0         | 2.34E+08  | 906550   | 1.1E+08  | 0        | 19055000 | 1614300  | 5068000  |          |         |
| Q15042    | Q15042    | Rab3 GAPase-activating protein catalytic subunit       | RAB3GAP1   | sp Q15042 | 10 | 10 | 10 | 0 | 3  | 0  | 10 | 0  | 3  | 0  | 10 | 16.9 | 110.52 | 0         | 42.028   | 344650000 | 0         | 33671000  | 0        | 3.11E+08 | 0        | 6788300  | 0        | 8969300  |          |         |
| AGNH99    | AGNH99    | Structural maintenance of chromosomes flexible         | SMCHD1     | sp AGNH99 | 12 | 12 | 12 | 4 | 12 | 11 | 6  | 4  | 12 | 11 | 6  | 8.1  | 226.37 | 157550000 | 41667000 | 344230000 | 0         | 1.02E+08  | 29355000 | 1.02E+08 | 29355000 | 10201000 | 21659000 | 30276000 |          |         |
| Q8N0K7    | Q8N0K7    | Sproutin                                               | SPG20      | sp Q8N0K7 | 10 | 10 | 10 | 0 | 10 | 4  | 9  | 0  | 10 | 4  | 9  | 19.1 | 72.832 | 0         | 25.91    | 344060000 | 0         | 1.52E+08  | 3005300  | 1.89E+08 | 0        | 16822000 | 1632900  | 4759700  |          |         |
| O95571    | O95571    | Persulfide dioxygenase ETHE1, mitochondrial            | ETHE1      | sp O95571 | 4  | 4  | 4  | 0 | 2  | 0  | 4  | 0  | 2  | 0  | 4  | 24.4 | 27.873 | 0         | 25.691   | 344030000 | 0         | 7449000   | 0        | 3.4E+08  | 0        | 563950   | 0        | 13935000 |          |         |
| P19404    | P19404    | NADH dehydrogenase [ubiquinone] flavoprotein; NDU      | NDUFV2     | sp P19404 | 4  | 4  | 4  | 0 | 4  | 0  | 4  | 0  | 4  | 0  | 4  | 21.7 | 27.391 | 0         | 10.852   | 342880000 | 0         | 1.68E+08  | 0        | 1.74E+08 | 0        | 13931000 | 0        | 8038200  |          |         |
| Q14919    | Q14919    | DRI1-associated corepressor                            | DRAP1      | sp Q14919 | 4  | 4  | 4  | 0 | 4  | 0  | 4  | 0  | 4  | 0  | 4  | 21.7 | 27.391 | 0         | 13.155   | 342740000 | 0         | 1.53E+08  | 1845200  | 1.88E+08 | 0        | 15351000 | 3236900  | 56072000 |          |         |
| O43432    | O43432    | Eukaryotic translation initiation factor 4 gamma 3     | EIF4G3     | sp O43432 | 8  | 6  | 6  | 2 | 7  | 3  | 8  | 1  | 6  | 1  | 5  | 1    | 6.6    | 176.65    | 0        | 21.707    | 342700000 | 193920    | 52863000 | 4108900  | 2.86E+08 | 417180   | 2476400  | 1574200  | 14890000 |         |
| P15407    | P15407    | Fos-related antigen 1                                  | FOSL1      | sp P15407 | 2  | 2  | 2  | 1 | 1  | 1  | 2  | 1  | 1  | 1  | 2  | 11.1 | 29.413 | 0         | 28.027   | 342520000 | 65721000  | 38406000  | 8446800  | 2.65E+08 | 69988000 | 5023200  | 5298900  | 2303200  |          |         |
| O60568    | O60568    | Procollagen-lysine, 2-oxoglutarate 5-dioxygenase; 1    | PLOD3      | sp O60568 | 6  | 6  | 6  | 0 | 4  | 3  | 6  | 0  | 4  | 3  | 6  | 8.1  | 84.784 | 0         | 15.392   | 342480000 | 0         | 27273000  | 3083400  | 3.02E+08 | 0        | 2115300  | 2804500  | 11547000 |          |         |
| O14776;Q  | O14776;Q  | Transcription elongation regulator 1                   | TCEG1      | sp O14776 | 13 | 13 | 13 | 0 | 11 | 2  | 13 | 0  | 11 | 2  | 13 | 12.8 | 123.9  | 0         | 28.489   | 342100000 | 0         | 1.38E+08  | 1837000  | 1.1E+08  | 0        | 13572000 | 3089700  | 5050300  |          |         |
| Q5JRA6    | Q5JRA6    | Melanoma inhibitory activity protein 3                 | MIA3       | sp Q5JRA6 | 15 | 15 | 15 | 0 | 10 | 11 | 0  | 10 | 11 | 0  | 11 | 15.7 | 213.7  | 0         | 42.179   | 342020000 | 0         | 1.14E+08  | 0        | 2.28E+08 | 0        | 12150000 | 0        | 7293100  |          |         |
| Q9Y394    | Q9Y394    | Dehydrogenase/reductase SDR family member 7            | DHR57      | sp Q9Y394 | 7  | 7  | 7  | 0 | 4  | 1  | 6  | 0  | 4  | 1  | 6  | 32.2 | 38.298 | 0         | 50.518   | 341320000 | 0         | 48311000  | 2024900  | 2.91E+08 | 0        | 37009000 | 3431200  | 10454000 |          |         |
| Q9H936;Q  | Q9H936;Q  | Mitochondrial glutamate carrier 1;Mitochondrial        | SLC25A22   | sp Q9H936 | 8  | 8  | 8  | 0 | 8  | 6  | 7  | 0  | 8  | 6  | 7  | 27.6 | 34.47  | 0         | 20.978   | 340620000 | 0         | 1.07E+08  | 14758000 | 2.19E+08 | 0        | 6699000  | 12905000 | 8740300  |          |         |
| Q6UVK1    | Q6UVK1    | Chondroitin sulfate proteoglycan 4                     | CSP64      | sp Q6UVK1 | 13 | 13 | 13 | 1 | 0  | 13 | 1  | 0  | 13 | 1  | 0  | 13   | 9      | 250.53    | 0        | 50.133    | 340510000 | 547000    | 4652300  | 0        | 3.35E+08 | 796650   | 0        | 13540000 |          |         |
| Q69YN2    | Q69YN2    | CWF19-like protein 1                                   | CWF19L1    | sp Q69YN2 | 10 | 10 | 10 | 1 | 9  | 0  | 10 | 1  | 9  | 0  | 10 | 19.5 | 60.618 | 0         | 23.794   | 340410000 | 211140    | 1.66E+08  | 0        | 1.74E+08 | 651070   | 1842400  | 0        | 2946500  |          |         |
| Q969G3    | Q969G3    | SWI/NF-related matrix-associated actin-depend          | SMARCE1    | sp Q969G3 | 7  | 7  | 7  | 0 | 5  | 2  | 6  | 0  | 5  | 2  | 6  | 29.9 | 46.649 | 0         | 22.245   | 339020000 | 0         | 95215000  | 3564200  | 2.4E+08  | 0        | 7867800  | 3034900  | 9765600  |          |         |
| Q95486    | Q95486    | Protein transport protein Sec24A                       | SEC24A     | sp Q95486 | 8  | 8  | 8  | 1 | 5  | 0  | 8  | 1  | 5  | 0  | 8  | 10.7 | 119.75 | 0         | 28.019   | 338010000 | 276550    | 55977000  | 0        | 2.82E+08 | 577410   | 2608800  | 0        | 13612000 |          |         |
| Q9H910    | Q9H910    | Hematological and neurological expressed 1-like        | HNL1       | sp Q9H910 | 6  | 6  | 6  | 0 | 6  | 0  | 5  | 0  | 6  | 0  | 5  | 5.1  | 20.063 | 0         | 29.609   | 337480000 | 0         | 3.22E+08  | 0        | 1.06E+08 | 0        | 15820000 | 0        | 4946200  |          |         |
| Q32P78    | Q32P78    | Prolyl 3-hydroxylase 1                                 | LEPR1      | sp Q32P78 | 7  | 7  | 7  | 0 | 6  | 0  | 6  | 0  | 6  | 0  | 6  | 12.9 | 83.393 | 0         | 30.302   | 336350000 | 0         | 1.04E+08  | 0        | 2.42E+08 | 0        | 9033200  | 0        | 9711600  |          |         |
| P56385    | P56385    | ATP synthase subunit e, mitochondrial                  | ATP5E      | sp P56385 | 4  | 4  | 4  | 0 | 4  | 2  | 3  | 0  | 4  | 2  | 3  | 42   | 7.931  | 0         | 6.7692   | 336080000 | 0         | 1.81E+08  | 1182200  | 1.54E+08 | 0        | 16212000 | 2365600  | 4485200  |          |         |
| Q3LXA3    | Q3LXA3    | Bifunctional ATP-dependent dihydroxyacetone kin        | DAK        | sp Q3LXA3 | 7  | 7  | 7  | 0 | 6  | 0  | 7  | 0  | 6  | 0  | 7  | 20.5 | 58.946 | 0         | 21.616   | 335930000 | 0         | 1.02E+08  | 0        | 2.34E+08 | 0        | 8064500  | 0        | 10533000 |          |         |
| Q9UBP6    | Q9UBP6    | RNA [guanine-7(N7)]-methyltransferase                  | METTL1     | sp Q9UBP6 | 6  | 6  | 6  | 0 | 6  |    |    |    |    |    |    |      |        |           |          |           |           |           |          |          |          |          |          |          |          |         |



|           |        |                                                                  |          |           |    |    |    |   |    |    |    |   |    |    |    |   |    |      |        |        |        |           |           |           |           |          |          |          |          |          |          |          |         |
|-----------|--------|------------------------------------------------------------------|----------|-----------|----|----|----|---|----|----|----|---|----|----|----|---|----|------|--------|--------|--------|-----------|-----------|-----------|-----------|----------|----------|----------|----------|----------|----------|----------|---------|
| Q13438    | Q13438 | Protein OS-9                                                     | OS9      | sp Q13438 | 4  | 4  | 4  | 0 | 3  | 2  | 4  | 0 | 3  | 2  | 4  | 0 | 3  | 2    | 4      | 6.6    | 75.561 | 0         | 5.8272    | 322080000 | 0         | 15555000 | 1479300  | 3.05E+08 | 0        | 3310800  | 4142300  | 7457400  |         |
| Q9BYD6    | Q9BYD6 | 39S ribosomal protein L1, mitochondrial                          | MRPL1    | sp Q9BYD6 | 7  | 7  | 1  | 7 | 5  | 6  | 1  | 7 | 5  | 6  | 1  | 7 | 5  | 6    | 26.5   | 36.908 | 0      | 15.573    | 321840000 | 1686100   | 1.72E+08  | 9320500  | 1.38E+08 | 2903800  | 13375000 | 5742800  | 5871500  |          |         |
| Q9UBM7    | Q9UBM7 | 7-dehydrocholesterol reductase                                   | DHCR7    | sp Q9UBM7 | 6  | 6  | 0  | 5 | 3  | 6  | 0  | 5 | 3  | 6  | 0  | 5 | 3  | 6    | 13.5   | 54.489 | 0      | 23.612    | 321540000 | 0         | 1.62E+08  | 4816200  | 1.81E+08 | 0        | 9660000  | 6573400  | 6488800  |          |         |
| Q95487    | Q95487 | Protein transport protein Sec24B                                 | SEC24B   | sp Q95487 | 9  | 9  | 0  | 6 | 0  | 9  | 0  | 6 | 0  | 9  | 0  | 6 | 0  | 9    | 11.8   | 137.42 | 0      | 87.373    | 321350000 | 0         | 29449000  | 0        | 2.92E+08 | 0        | 4225600  | 0        | 10375000 |          |         |
| Q08380    | Q08380 | Galactin-3-binding protein                                       | LGALS3BP | sp Q08380 | 7  | 7  | 7  | 6 | 7  | 6  | 7  | 6 | 7  | 6  | 7  | 6 | 7  | 15.2 | 65.33  | 0      | 21.059 | 321180000 | 0         | 56302000  | 18281000  | 2.47E+08 | 0        | 4495900  | 14610000 | 8283300  |          |          |         |
| Q6NXE6    | Q6NXE6 | Armadillo repeat-containing protein 6                            | ARMC6    | sp Q6NXE6 | 5  | 5  | 5  | 3 | 1  | 5  | 0  | 3 | 1  | 5  | 0  | 3 | 1  | 5    | 17.8   | 54.141 | 0      | 49.715    | 319360000 | 0         | 64879000  | 546550   | 2.09E+08 | 0        | 8212200  | 0        | 7949800  |          |         |
| Q9H2P9    | Q9H2P9 | Diphthine synthase                                               | DPHS     | sp Q9H2P9 | 5  | 5  | 5  | 3 | 1  | 5  | 0  | 3 | 1  | 5  | 0  | 3 | 1  | 5    | 27.7   | 31.651 | 0      | 49.616    | 319050000 | 790430    | 1.09E+08  | 0        | 2.54E+08 | 3255500  | 8748900  | 0        | 7016000  |          |         |
| Q15270    | Q15270 | Serine palmitoyltransferase 2                                    | SPTLC2   | sp Q15270 | 9  | 9  | 9  | 1 | 5  | 2  | 1  | 5 | 2  | 8  | 1  | 5 | 2  | 8    | 29.4   | 62.924 | 0      | 62.427    | 318320000 | 3804200   | 67569000  | 4079100  | 2.41E+08 | 4398000  | 4709900  | 4853700  | 9797700  |          |         |
| Q13459    | Q13459 | Unconventional myosin-1xB                                        | MYO9B    | sp Q13459 | 18 | 18 | 18 | 0 | 3  | 6  | 18 | 0 | 3  | 6  | 18 | 0 | 3  | 6    | 18     | 12.3   | 243.4  | 0         | 32.894    | 318310000 | 0         | 16664000 | 6791800  | 2.97E+08 | 0        | 1427300  | 7237100  | 8222800  |         |
| P98082    | P98082 | Disabed homolog 2                                                | DAB2     | sp P98082 | 9  | 9  | 9  | 0 | 0  | 0  | 9  | 0 | 0  | 9  | 0  | 0 | 9  | 20.4 | 82.877 | 0      | 23.949 | 318230000 | 0         | 26600000  | 0         | 3.18E+08 | 0        | 0        | 0        | 13087000 |          |          |         |
| Q68697    | Q68697 | SH3 domain-containing kinase-binding protein 1                   | SH3BP1   | sp Q68697 | 4  | 4  | 4  | 0 | 0  | 4  | 0  | 0 | 4  | 0  | 0  | 4 | 0  | 4    | 9.5    | 73.125 | 0      | 21.918    | 318010000 | 0         | 0         | 0        | 3.38E+08 | 0        | 0        | 0        | 13078000 |          |         |
| Q9HD20    | Q9HD20 | Manganese-transporting ATPase 13A1                               | ATP13A1  | sp Q9HD20 | 11 | 11 | 11 | 0 | 6  | 1  | 10 | 0 | 6  | 1  | 10 | 0 | 6  | 1    | 10     | 11.5   | 132.95 | 0         | 21.433    | 317340000 | 0         | 46450000 | 44008000 | 2.78E+08 | 0        | 4942800  | 0        | 8482500  |         |
| Q15643    | Q15643 | Thyroid receptor-interacting protein 11                          | TRIP11   | sp Q15643 | 16 | 16 | 16 | 0 | 3  | 3  | 16 | 0 | 3  | 3  | 16 | 0 | 3  | 3    | 16     | 11.8   | 227.58 | 0         | 41.693    | 316530000 | 0         | 11601000 | 4723600  | 3E+08    | 0        | 1385300  | 2401500  | 12756000 |         |
| Q00401    | Q00401 | Neural Wiskott-Aldrich syndrome protein                          | WASL     | sp Q00401 | 7  | 7  | 7  | 0 | 5  | 0  | 5  | 0 | 5  | 0  | 5  | 0 | 5  | 0    | 25.9   | 54.826 | 0      | 65.661    | 316260000 | 0         | 38039000  | 0        | 2.78E+08 | 0        | 4443700  | 0        | 10352000 |          |         |
| Q12846    | Q12846 | Syntaxin-4                                                       | STX4     | sp Q12846 | 6  | 6  | 6  | 0 | 4  | 0  | 6  | 0 | 4  | 0  | 6  | 0 | 4  | 0    | 6      | 38.4   | 34.18  | 0         | 45.492    | 315240000 | 0         | 52837000 | 0        | 2.62E+08 | 0        | 6155600  | 0        | 9293500  |         |
| Q00567    | Q00567 | Nucleolar protein 56                                             | NOP56    | sp Q00567 | 9  | 9  | 9  | 0 | 9  | 6  | 8  | 0 | 9  | 6  | 8  | 0 | 9  | 6    | 8      | 25.1   | 66.049 | 0         | 8196000   | 30089000  | 2.03E+08  | 0        | 5400300  | 23372000 | 7154900  | 0        | 10295000 |          |         |
| Q16799    | Q16799 | Reticulon-1                                                      | RTN1     | sp Q16799 | 10 | 10 | 10 | 1 | 1  | 2  | 10 | 1 | 1  | 2  | 10 | 1 | 1  | 2    | 10     | 18     | 83.617 | 0         | 27.551    | 313620000 | 1001100   | 70167000 | 1665900  | 2.4E+08  | 856030   | 7486600  | 1019600  | 8867000  |         |
| Q9Y2X7    | Q9Y2X7 | ARF GTPase-activating protein GIT1                               | GIT1     | sp Q9Y2X7 | 4  | 3  | 3  | 0 | 4  | 1  | 4  | 0 | 3  | 1  | 3  | 0 | 3  | 1    | 3      | 9.1    | 84.34  | 0         | 8.1039    | 313050000 | 0         | 66900000 | 3624500  | 2.4E+08  | 0        | 5314600  | 294600   | 1004800  |         |
| Q9HD33    | Q9HD33 | 39S ribosomal protein L47, mitochondrial                         | MRPL47   | sp Q9HD33 | 6  | 6  | 6  | 0 | 6  | 5  | 5  | 0 | 6  | 5  | 5  | 0 | 6  | 5    | 5      | 20.8   | 29.45  | 0         | 16.401    | 312860000 | 0         | 1.33E+08 | 1620400  | 1.64E+08 | 0        | 9545300  | 1249700  | 7298000  |         |
| Q13131    | Q13131 | 5-AMP-activated protein kinase catalytic subunit: PRKAA1         | PRKAA1   | sp Q13131 | 6  | 6  | 5  | 0 | 3  | 6  | 0  | 3 | 6  | 0  | 3  | 6 | 0  | 3    | 6      | 14.5   | 64.009 | 0         | 69.225    | 312440000 | 0         | 55558000 | 5056600  | 2.52E+08 | 0        | 5179500  | 498700   | 8489000  |         |
| Q13510    | Q13510 | Acid ceramidase;Acid ceramidase subunit alpha;ASAH1              | ASAH1    | sp Q13510 | 2  | 2  | 2  | 0 | 2  | 2  | 2  | 0 | 2  | 2  | 2  | 0 | 2  | 2    | 2      | 8.6    | 44.659 | 0         | 21.069    | 312150000 | 0         | 42741000 | 25495000 | 2.44E+08 | 0        | 3865600  | 18436000 | 8629700  |         |
| Q68E01    | Q68E01 | Integrator complex subunit 3                                     | INTS3    | sp Q68E01 | 5  | 5  | 5  | 0 | 4  | 1  | 5  | 0 | 4  | 1  | 5  | 0 | 4  | 1    | 5      | 10.3   | 118.07 | 0         | 46.548    | 311470000 | 0         | 42047000 | 3058000  | 2.66E+08 | 0        | 4347800  | 2238300  | 10130000 |         |
| Q43674    | Q43674 | NADH dehydrogenase [ubiquinone] 1 beta subunit NDUFBS2           | NDUFBS2  | sp Q43674 | 4  | 4  | 4  | 0 | 1  | 3  | 0  | 4 | 0  | 1  | 3  | 0 | 4  | 0    | 3      | 19     | 21.75  | 0         | 11.698    | 311020000 | 0         | 97114000 | 7260600  | 2.06E+08 | 0        | 7329700  | 6910100  | 7925300  |         |
| Q96QD8    | Q96QD8 | Sodium-coupled neutral amino acid transporter 2 SLC38A5          | SLC38A5  | sp Q96QD8 | 4  | 4  | 4  | 0 | 2  | 1  | 4  | 0 | 2  | 1  | 4  | 0 | 2  | 1    | 4      | 15.4   | 56.025 | 0         | 17.934    | 310880000 | 0         | 89863000 | 3358700  | 2.18E+08 | 0        | 7759100  | 2575100  | 8787000  |         |
| Q75340    | Q75340 | Programmed cell death protein 6                                  | PDCD6    | sp Q75340 | 4  | 4  | 4  | 0 | 3  | 2  | 4  | 0 | 3  | 2  | 4  | 0 | 3  | 2    | 4      | 21.5   | 21.868 | 0         | 11.816    | 310280000 | 0         | 92182000 | 4948400  | 1.23E+08 | 0        | 8627800  | 5069300  | 6520000  |         |
| Q8TF05    | Q8TF05 | Serine/threonine-protein phosphatase 4 regulator PPP4R1          | PPP4R1   | sp Q8TF05 | 9  | 9  | 9  | 1 | 8  | 0  | 9  | 1 | 8  | 0  | 9  | 1 | 8  | 0    | 9      | 12.2   | 137    | 0         | 23.949    | 309600000 | 664020    | 4933000  | 0        | 2.6E+08  | 0        | 5690000  | 0        | 9328200  |         |
| Q4G013    | Q4G013 | La-related protein 7                                             | LARP7    | sp Q4G013 | 10 | 10 | 10 | 6 | 6  | 0  | 10 | 6 | 6  | 0  | 10 | 6 | 6  | 0    | 10     | 6      | 20.4   | 66.898    | 0         | 24.423    | 308520000 | 0        | 1.31E+08 | 23155000 | 1.55E+08 | 0        | 10486000 | 16678000 | 6272800 |
| Q9Y512    | Q9Y512 | Sorting and assembly machinery component 50 h SAMM50             | SAMM50   | sp Q9Y512 | 7  | 7  | 7  | 0 | 7  | 2  | 6  | 0 | 7  | 2  | 6  | 0 | 7  | 2    | 6      | 23     | 51.976 | 0         | 15.919    | 308540000 | 0         | 1.51E+08 | 3310700  | 1.54E+08 | 0        | 19396000 | 2671100  | 4922900  |         |
| Q9NQ88    | Q9NQ88 | Fructose-2,6-bisphosphatase TIGAR                                | TIGAR    | sp Q9NQ88 | 3  | 3  | 3  | 0 | 3  | 0  | 3  | 0 | 3  | 0  | 3  | 0 | 3  | 0    | 3      | 13     | 30.062 | 0         | 12.599    | 308080000 | 0         | 1.21E+08 | 0        | 1.87E+08 | 0        | 10218000 | 0        | 8132400  |         |
| Q9H9T3    | Q9H9T3 | Elongator complex protein 3                                      | ELP3     | sp Q9H9T3 | 5  | 5  | 5  | 0 | 3  | 0  | 5  | 0 | 3  | 0  | 5  | 0 | 3  | 0    | 5      | 14.4   | 62.258 | 0         | 27.478    | 307860000 | 0         | 48830000 | 0        | 2.59E+08 | 0        | 5708900  | 0        | 9248000  |         |
| P50851:Q5 | P50851 | Lipopolysaccharide-responsive and beige-like anchor protein LRBA | LRBA     | sp P50851 | 18 | 18 | 18 | 2 | 15 | 2  | 16 | 2 | 15 | 2  | 16 | 2 | 15 | 2    | 16     | 8.9    | 319.1  | 0         | 44.812    | 307710000 | 7091100   | 90913000 | 1500300  | 2.08E+08 | 4418700  | 11417000 | 686250   | 8153700  |         |
| P14923    | P14923 | Junction plakoglobin                                             | JUP      | sp P14923 | 13 | 11 | 11 | 0 | 11 | 13 | 7  | 0 | 9  | 11 | 5  | 0 | 9  | 11   | 5      | 20.8   | 81.744 | 0         | 33.27     | 305790000 | 0         | 94695000 | 19143000 | 19667000 | 0        | 3306900  | 13068000 | 1244700  |         |
| Q8XB1     | Q8XB1  | Dnal homolog subfamily C member 10                               | DNALC10  | sp Q8XB1  | 8  | 8  | 8  | 2 | 3  | 8  | 2  | 3 | 8  | 2  | 3  | 8 | 2  | 3    | 8      | 14     | 91.700 | 0         | 30.32     | 305500000 | 8260900   | 32471000 | 14118000 | 2.51E+08 | 12800000 | 2484100  | 970000   | 5914300  |         |
| P11047:Q5 | P11047 | Laminin subunit gamma-1                                          | LAMC1    | sp P11047 | 11 | 11 | 11 | 1 | 5  | 1  | 11 | 1 | 5  | 1  | 11 | 1 | 5  | 1    | 11     | 9.3    | 177.6  | 0         | 36.771    | 305470000 | 34323000  | 58203000 | 1596000  | 2.11E+08 | 21763000 | 9625500  | 3847100  | 13982000 |         |
| Q9Y4P1    | Q9Y4P1 | Cysteine protease ATG4A                                          | ATG4A    | sp Q9Y4P1 | 4  | 4  | 4  | 1 | 3  | 1  | 3  | 1 | 3  | 1  | 3  | 1 | 3  | 1    | 3      | 17.6   | 44.294 | 0         | 52.792    | 305210000 | 227850    | 59496000 | 7462000  | 2.38E+08 | 2879500  | 6657800  | 3969700  | 6854800  |         |
| Q9Y496    | Q9Y496 | Kinesin-like protein KIF3A                                       | KIF3A    | sp Q9Y496 | 10 | 10 | 10 | 1 | 8  | 1  | 9  | 1 | 8  | 1  | 9  | 1 | 8  | 1    | 9      | 14.4   | 80.125 | 0         | 22.908    | 304400000 | 907440    | 48246000 | 1056000  | 2.54E+08 | 0        | 3913500  | 4991000  | 6511600  |         |
| Q9BW91    | Q9BW91 | ADP-ribose pyrophosphatase, mitochondrial                        | NUDT9    | sp Q9BW91 | 6  | 6  | 6  | 0 | 4  | 0  | 5  | 0 | 4  | 0  | 5  | 0 | 4  | 0    | 5      | 30     | 39.125 | 0         | 31.245    | 304270000 | 0         | 53618000 | 0        | 2.51E+08 | 0        | 9289000  | 0        | 0        |         |
| Q13330    | Q13330 | Metastasis-associated protein MTA1                               | MTA1     | sp Q13330 | 10 | 10 | 10 | 1 | 8  | 4  | 8  | 1 | 8  | 4  | 8  | 1 | 8  | 4    | 8      | 18.6   | 80.785 | 0         | 22.841    | 304200000 | 172860    | 1.05E+08 | 6942800  | 1.92E+08 | 802230   | 5707500  | 3710000  | 11792000 |         |
| Q86U38    | Q86U38 | Nucleolar protein 9                                              | NOP9     | sp Q86U38 | 5  | 5  | 5  | 0 | 3  | 5  | 0  | 3 | 5  | 0  | 3  | 5 | 0  | 3    | 5      | 9.9    | 69.437 | 0         | 11.923    | 303900000 | 0         | 9668700  | 2.94E+08 | 0        | 0        | 10860000 | 7738300  | 0        |         |
| Q9H832    | Q9H832 | Ubiquitin-conjugating enzyme E2 Z                                | UBE2Z    | sp Q9H832 | 6  | 6  | 6  | 0 | 3  | 0  | 6  | 0 | 3  | 0  | 6  | 0 | 3  | 0    | 6      | 16.9   | 38.21  | 0         | 27.753    | 303490000 | 0         | 55488000 | 0        | 2.48E+08 | 0        | 6240400  | 0        | 8850200  |         |
| Q9UPN7    | Q9UPN7 | Serine/threonine-protein phosphatase 6 regulator PPP6R1          | PPP6R1   | sp Q9UPN7 | 6  | 6  | 6  | 0 | 4  | 2  | 6  | 0 | 4  | 2  | 6  | 0 | 4  | 2    | 6      | 14.5   | 96.723 | 0         | 50.913    | 303470000 | 0         | 48479000 | 3107000  | 2.52E+08 | 0        | 3927800  | 1764300  | 1102800  |         |
| Q9NV11    | Q9NV11 | Fanconi anemia group I protein                                   | FANCI    | sp Q9NV11 | 12 | 12 | 12 | 0 | 12 | 1  | 7  | 0 | 12 | 1  | 7  | 0 | 12 | 1    | 7      | 12.4   | 149.32 | 0         | 24.635    | 303170000 | 0         | 2.15E+08 | 734360   | 87532000 | 0        | 15618000 | 0        | 6925200  |         |
| Q9U110    | Q9U110 | Translation initiation factor eIF-2B subunit delta               | EIF2B4   | sp Q9U110 | 6  | 6  | 6  | 0 | 2  | 4  | 6  | 0 | 2  | 4  | 6  | 0 | 2  | 4    | 6      | 16.6   | 57.557 | 0         | 27.311    | 302810000 | 0         | 26920000 | 7540300  | 2.69E+08 | 0        | 5397700  | 6174300  |          |         |

|           |           |                                                    |           |           |    |    |      |   |    |   |    |   |    |   |    |   |    |   |    |   |    |   |    |   |    |   |      |        |        |          |           |           |           |          |           |          |          |          |           |          |         |
|-----------|-----------|----------------------------------------------------|-----------|-----------|----|----|------|---|----|---|----|---|----|---|----|---|----|---|----|---|----|---|----|---|----|---|------|--------|--------|----------|-----------|-----------|-----------|----------|-----------|----------|----------|----------|-----------|----------|---------|
| Q92530    | Q92530    | Proteasome inhibitor PI31 subunit                  | PSMF1     | sp Q92530 | 3  | 3  | 3    | 0 | 2  | 0 | 2  | 0 | 2  | 0 | 2  | 0 | 2  | 0 | 2  | 0 | 2  | 0 | 2  | 0 | 2  | 0 | 2    | 14.4   | 29.816 | 0        | 9.9497    | 288040000 | 0         | 1.16E+08 | 0         | 1.72E+08 | 0        | 7120900  | 0         | 10189000 |         |
| Q3YEC7    | Q3YEC7    | Rab-like protein 6                                 | RABL6     | sp Q3YEC7 | 8  | 8  | 8    | 0 | 8  | 0 | 6  | 0 | 8  | 0 | 6  | 0 | 6  | 0 | 6  | 0 | 6  | 0 | 6  | 0 | 6  | 0 | 6    | 16.9   | 79.548 | 0        | 20.548    | 287960000 | 0         | 2.22E+08 | 0         | 66318000 | 0        | 16821000 | 0         | 5443600  |         |
| Q96C86    | Q96C86    | mGpppX diphosphatase                               | DCP5      | sp Q96C86 | 6  | 6  | 6    | 0 | 6  | 0 | 4  | 0 | 6  | 0 | 4  | 0 | 6  | 0 | 4  | 0 | 6  | 0 | 4  | 0 | 6  | 0 | 4    | 24.9   | 38.608 | 0        | 23.289    | 287560000 | 0         | 2.51E+08 | 0         | 36803000 | 0        | 20347000 | 0         | 3278000  |         |
| Q8WV59    | Q8WV59    | SPRY domain-containing protein 3                   | SPRYD4    | sp Q8WV59 | 2  | 2  | 2    | 0 | 2  | 0 | 2  | 0 | 2  | 0 | 2  | 0 | 2  | 0 | 2  | 0 | 2  | 0 | 2  | 0 | 2  | 0 | 2    | 2.22   | 23.128 | 0        | 10.024    | 287300000 | 0         | 1.5E+08  | 0         | 1.37E+08 | 0        | 12056000 | 0         | 6809100  |         |
| Q8VDV9    | Q8VDV9    | Nucl domain-containing protein 3                   | NUDCD3    | sp Q8VDV9 | 10 | 10 | 10   | 0 | 8  | 1 | 9  | 0 | 8  | 1 | 9  | 0 | 8  | 1 | 9  | 0 | 8  | 1 | 9  | 0 | 8  | 1 | 9    | 43.2   | 40.822 | 0        | 58.928    | 287140000 | 0         | 75278000 | 3686600   | 2.08E+08 | 0        | 5457300  | 3184500   | 9032700  |         |
| Q14976    | Q14976    | Cyclin-G-associated kinase                         | GAK       | sp Q14976 | 7  | 7  | 7    | 0 | 1  | 1 | 7  | 0 | 1  | 1 | 7  | 0 | 1  | 1 | 7  | 0 | 1  | 1 | 7  | 0 | 1  | 1 | 7    | 10.2   | 143.19 | 0        | 33.248    | 285730000 | 0         | 4397900  | 2074700   | 2.79E+08 | 0        | 380620   | 74500     | 12141000 |         |
| Q7Z275    | Q7Z275    | TRMT1-like protein                                 | TRMT1L    | sp Q7Z275 | 10 | 10 | 10   | 0 | 9  | 3 | 8  | 0 | 9  | 3 | 8  | 0 | 9  | 3 | 8  | 0 | 9  | 3 | 8  | 0 | 9  | 3 | 8    | 23.5   | 81.746 | 0        | 26.56     | 285680000 | 0         | 1.01E+08 | 13076000  | 1.72E+08 | 0        | 6407600  | 13085000  | 5250700  |         |
| Q16762    | Q16762    | Thiosulfate sulfurtransferase                      | TST       | sp Q16762 | 4  | 4  | 4    | 0 | 4  | 0 | 1  | 0 | 4  | 0 | 1  | 0 | 4  | 0 | 1  | 0 | 4  | 0 | 1  | 0 | 4  | 0 | 1    | 21.5   | 33.429 | 0        | 40.012    | 285650000 | 0         | 2.56E+08 | 0         | 29721000 | 0        | 22429000 | 0         | 1353200  |         |
| Q3KQU3    | Q3KQU3    | MAP7 domain-containing protein 1                   | MAP7D1    | sp Q3KQU3 | 12 | 12 | 12   | 0 | 2  | 9 | 11 | 0 | 2  | 9 | 11 | 0 | 2  | 9 | 11 | 0 | 2  | 9 | 11 | 0 | 2  | 9 | 11   | 19.1   | 92.819 | 0        | 27.023    | 285250000 | 0         | 9638000  | 41265000  | 2.34E+08 | 0        | 1303700  | 29945000  | 6968800  |         |
| Q9UB00    | Q9UB00    | Vacuolar protein sorting-associated protein 29     | VPS29     | sp Q9UB00 | 3  | 3  | 3    | 0 | 2  | 0 | 3  | 0 | 2  | 0 | 3  | 0 | 2  | 0 | 3  | 0 | 2  | 0 | 3  | 0 | 2  | 0 | 3    | 23.6   | 20.305 | 0        | 67.376    | 285100000 | 0         | 78118000 | 0         | 2.07E+08 | 0        | 8252200  | 0         | 7146000  |         |
| Q8VWV2    | Q8VWV2    | Nucl domain-containing protein 2                   | NUDCD2    | sp Q8VWV2 | 3  | 3  | 3    | 0 | 3  | 1 | 3  | 0 | 3  | 1 | 3  | 0 | 3  | 1 | 3  | 0 | 3  | 1 | 3  | 0 | 3  | 1 | 3    | 28     | 17.676 | 0        | 85.466    | 285100000 | 0         | 1.44E+08 | 868410    | 1.4E+08  | 0        | 11818000 | 0         | 2849100  |         |
| Q8UBC2    | Q8UBC2    | Epidermal growth factor receptor substrate 15-like | EPH5L1    | sp Q8UBC2 | 11 | 11 | 11   | 0 | 10 | 0 | 9  | 0 | 10 | 0 | 9  | 0 | 10 | 0 | 9  | 0 | 10 | 0 | 9  | 0 | 10 | 0 | 9    | 16     | 94.254 | 0        | 45.342    | 284970000 | 0         | 1.03E+08 | 0         | 1.82E+08 | 0        | 9515500  | 0         | 7042900  |         |
| P37235.P8 | P37235    | Hippocalcin-like protein 1                         | HPCAL1    | sp P37235 | 4  | 4  | 4    | 0 | 0  | 0 | 4  | 0 | 0  | 0 | 4  | 0 | 0  | 0 | 4  | 0 | 0  | 0 | 4  | 0 | 0  | 0 | 4    | 23.3   | 22.313 | 0        | 11.831    | 284780000 | 0         | 0        | 0         | 2.85E+08 | 0        | 0        | 0         | 11712000 |         |
| Q6P179    | Q6P179    | Endoplasmic reticulum aminopeptidase 2             | ERAP2     | sp Q6P179 | 8  | 8  | 8    | 0 | 1  | 0 | 8  | 0 | 1  | 0 | 8  | 0 | 1  | 0 | 8  | 0 | 1  | 0 | 8  | 0 | 1  | 0 | 8    | 12.9   | 110.46 | 0        | 53.835    | 284620000 | 0         | 3656400  | 0         | 2.81E+08 | 0        | 322300   | 0         | 11555000 |         |
| Q9Y508    | Q9Y508    | E3 ubiquitin-protein ligase RNF114                 | RNF114    | sp Q9Y508 | 4  | 4  | 4    | 0 | 4  | 2 | 4  | 0 | 4  | 2 | 4  | 0 | 4  | 2 | 4  | 0 | 4  | 2 | 4  | 0 | 4  | 2 | 4    | 26.8   | 25.694 | 0        | 40.523    | 284150000 | 0         | 70608000 | 3248200   | 2.1E+08  | 0        | 5769000  | 2585100   | 8166000  |         |
| O95273    | O95273    | Cyclin-D1-binding protein 1                        | CNBDP1    | sp O95273 | 1  | 1  | 1    | 0 | 1  | 0 | 0  | 0 | 1  | 0 | 0  | 0 | 1  | 0 | 0  | 0 | 1  | 0 | 0  | 0 | 1  | 0 | 0    | 2.5    | 40.262 | 0.009843 | 1.51      | 283670000 | 0         | 0        | 0         | 2.8E+08  | 0        | 0        | 0         | 1102100  |         |
| Q2M2I8    | Q2M2I8    | AP2-associated protein kinase 1                    | AAK1      | sp Q2M2I8 | 10 | 10 | 10   | 0 | 2  | 1 | 10 | 0 | 2  | 1 | 10 | 0 | 2  | 1 | 10 | 0 | 2  | 1 | 10 | 0 | 2  | 1 | 10   | 23.3   | 103.88 | 0        | 23.943    | 283270000 | 0         | 11891000 | 1082600   | 2.7E+08  | 0        | 1331100  | 1082800   | 1047800  |         |
| Q06265    | Q06265    | Exosome complex component RRP45                    | EXOSC9    | sp Q06265 | 5  | 5  | 5    | 0 | 5  | 3 | 5  | 0 | 5  | 3 | 5  | 0 | 5  | 3 | 5  | 0 | 5  | 3 | 5  | 0 | 5  | 3 | 5    | 14.4   | 48.948 | 0        | 15.387    | 283010000 | 0         | 1.17E+08 | 12721000  | 1.54E+08 | 0        | 8981200  | 10601000  | 5557000  |         |
| O00206    | O00206    | Toll-like receptor 4                               | TLR4      | sp O00206 | 3  | 3  | 3    | 0 | 2  | 3 | 2  | 0 | 2  | 3 | 2  | 0 | 2  | 3 | 2  | 0 | 2  | 3 | 2  | 0 | 2  | 3 | 2    | 4.4    | 95.679 | 0        | 6.326     | 282320000 | 0         | 44460000 | 25806000  | 2.12E+08 | 0        | 4002400  | 20456000  | 5522400  |         |
| Q12756    | Q12756    | Kinesin-like protein KIF1A                         | KIF1A     | sp Q12756 | 10 | 10 | 8    | 0 | 10 | 3 | 3  | 0 | 10 | 3 | 3  | 0 | 10 | 3 | 3  | 0 | 10 | 3 | 3  | 0 | 10 | 3 | 3    | 8.9    | 19.106 | 0        | 33.221    | 282290000 | 0         | 2.13E+08 | 5110800   | 64333000 | 0        | 9427900  | 8062400   | 7351700  |         |
| Q92769    | Q92769    | Histone deacetylase 2                              | HDAC2     | sp Q92769 | 9  | 5  | 4    | 0 | 1  | 8 | 4  | 0 | 4  | 2 | 3  | 0 | 4  | 2 | 3  | 0 | 4  | 2 | 3  | 0 | 4  | 2 | 3    | 23.8   | 55.364 | 0        | 33.11     | 280440000 | 0         | 78649000 | 5981200   | 1.96E+08 | 0        | 5804600  | 5505300   | 7695000  |         |
| PS1151.Q5 | PS1151    | Ras-related protein Rab-9A                         | RAB9A     | sp PS1151 | 5  | 5  | 5    | 0 | 3  | 0 | 5  | 0 | 3  | 0 | 5  | 0 | 3  | 0 | 5  | 0 | 3  | 0 | 5  | 0 | 3  | 0 | 5    | 37.3   | 22.837 | 0        | 17.322    | 280370000 | 0         | 57710000 | 0         | 2.23E+08 | 0        | 7922600  | 0         | 6321700  |         |
| P53680    | P53680    | AP-2 complex subunit sigma                         | AP2S1     | sp P53680 | 4  | 4  | 4    | 0 | 3  | 2 | 4  | 0 | 3  | 2 | 4  | 0 | 3  | 2 | 4  | 0 | 3  | 2 | 4  | 0 | 3  | 2 | 4    | 31     | 17.018 | 0        | 10.063    | 279760000 | 0         | 29758000 | 3929500   | 2.46E+08 | 0        | 3814300  | 3572700   | 7996700  |         |
| Q5T1M5    | Q5T1M5    | FK506-binding protein 15                           | FKBP15    | sp Q5T1M5 | 11 | 11 | 11   | 0 | 11 | 5 | 10 | 0 | 11 | 5 | 10 | 0 | 11 | 5 | 10 | 0 | 11 | 5 | 10 | 0 | 11 | 5 | 10   | 15.3   | 133.63 | 0        | 42.422    | 279290000 | 0         | 1.16E+08 | 3899600   | 1.6E+08  | 0        | 8078000  | 36618600  | 4680700  |         |
| Q9N2N4    | Q9N2N4    | EH domain-containing protein 2                     | EHD2      | sp Q9N2N4 | 8  | 8  | 8    | 0 | 2  | 8 | 0  | 2 | 8  | 0 | 2  | 8 | 0  | 2 | 8  | 0 | 2  | 8 | 0  | 2 | 8  | 0 | 2    | 8      | 23     | 61.161   | 0         | 44.113    | 278050000 | 0        | 0         | 2028100  | 2.7E+08  | 0        | 0         | 0        | 3541500 |
| Q15397    | Q15397    | Pumilio domain-containing protein KIAA0020         | KIAA0020  | sp Q15397 | 5  | 5  | 5    | 0 | 0  | 3 | 5  | 0 | 0  | 3 | 5  | 0 | 0  | 3 | 5  | 0 | 0  | 3 | 5  | 0 | 0  | 3 | 5    | 11.1   | 73.584 | 0        | 11.278    | 277990000 | 0         | 33176000 | 2.45E+08  | 0        | 0        | 21992000 | 10370000  | 5801000  |         |
| P08579    | P08579    | U2 small nuclear ribonucleoprotein B               | SNRBP2    | sp P08579 | 6  | 4  | 4    | 0 | 4  | 4 | 5  | 0 | 4  | 4 | 5  | 0 | 4  | 4 | 5  | 0 | 4  | 4 | 5  | 0 | 4  | 4 | 5    | 30.7   | 25.486 | 0        | 1.09E+08  | 277970000 | 0         | 7797600  | 1.61E+08  | 0        | 11584000 | 4221200  | 5680100   |          |         |
| Q04206    | Q04206    | Transcription factor p65                           | RELA      | sp Q04206 | 5  | 5  | 5    | 0 | 5  | 1 | 5  | 0 | 5  | 1 | 5  | 0 | 5  | 1 | 5  | 0 | 5  | 1 | 5  | 0 | 5  | 1 | 5    | 12.2   | 60.218 | 0        | 16.34     | 277340000 | 0         | 80509000 | 478180    | 1.9E+08  | 0        | 7631300  | 0         | 7540400  |         |
| O95168    | O95168    | NADH dehydrogenase [ubiquinone] 1 beta subcor      | NDUF84    | sp O95168 | 4  | 4  | 4    | 0 | 3  | 3 | 3  | 0 | 3  | 3 | 3  | 0 | 3  | 3 | 3  | 0 | 3  | 3 | 3  | 0 | 3  | 3 | 4.1  | 15.208 | 0      | 16.385   | 276960000 | 0         | 1.06E+08  | 9338300  | 1.62E+08  | 0        | 10066000 | 6394400  | 5782600   |          |         |
| Q86WJ1    | Q86WJ1    | Chromodomain-helicase-DNA-binding protein 1-like   | CHD1L     | sp Q86WJ1 | 8  | 8  | 8    | 0 | 8  | 2 | 5  | 0 | 8  | 2 | 5  | 0 | 8  | 2 | 5  | 0 | 8  | 2 | 5  | 0 | 8  | 2 | 5    | 11.4   | 101    | 0        | 32.836    | 276820000 | 0         | 1.56E+08 | 1953900   | 1.19E+08 | 0        | 8008000  | 8494700   | 3450500  |         |
| Q96K85    | Q96K85    | Lymphokine-activated killer T-cell-originated prot | PBK       | sp Q96K85 | 4  | 4  | 4    | 0 | 4  | 1 | 4  | 0 | 4  | 1 | 4  | 0 | 4  | 1 | 4  | 0 | 4  | 1 | 4  | 0 | 4  | 1 | 4    | 11.8   | 36.085 | 0        | 6.0155    | 276310000 | 0         | 78670000 | 601790    | 1.97E+08 | 0        | 3458500  | 855320    | 1112800  |         |
| P25311    | P25311    | Zinc-alpha-2-glycoprotein                          | AGZP1     | sp P25311 | 11 | 11 | 11   | 0 | 11 | 1 | 11 | 0 | 11 | 1 | 11 | 0 | 11 | 1 | 11 | 0 | 11 | 1 | 11 | 0 | 11 | 1 | 11   | 43     | 34.258 | 0        | 35.801    | 275930000 | 0         | 18197000 | 255570000 | 2160300  | 0        | 282780   | 173090000 | 46651    |         |
| P13984    | P13984    | General transcription factor IIF subunit 2         | GTFF2     | sp P13984 | 9  | 9  | 9    | 0 | 7  | 0 | 8  | 0 | 7  | 0 | 8  | 0 | 7  | 0 | 8  | 0 | 7  | 0 | 8  | 0 | 7  | 0 | 8    | 34.1   | 28.38  | 0        | 24.756    | 275730000 | 218650    | 66450000 | 0         | 2.09E+08 | 1689400  | 8219800  | 0         | 765400   |         |
| Q9POV9    | Q9POV9    | Septin-10                                          | Sept-10   | sp Q9POV9 | 6  | 6  | 6    | 0 | 0  | 2 | 6  | 0 | 0  | 2 | 6  | 0 | 0  | 2 | 6  | 0 | 0  | 2 | 6  | 0 | 0  | 2 | 6    | 19.8   | 52.592 | 0        | 36.169    | 275630000 | 0         | 1977400  | 2.74E+08  | 0        | 0        | 268580   | 12314000  | 7568100  |         |
| Q9UPT5    | Q9UPT5    | Exocyst complex component 7                        | EXOC7     | sp Q9UPT5 | 8  | 8  | 8    | 0 | 5  | 2 | 6  | 0 | 5  | 2 | 6  | 0 | 5  | 2 | 6  | 0 | 5  | 2 | 6  | 0 | 5  | 2 | 6    | 13.2   | 83.381 | 0        | 21.334    | 275330000 | 0         | 57561000 | 5155100   | 2.13E+08 | 0        | 5129300  | 4584700   | 5768100  |         |
| P10321.P0 | P10321.P0 | HLA class I histocompatibility antigen, Cw-7 alpha | HLA-C*HLA | sp P10321 | 3  | 2  | 1    | 0 | 1  | 2 | 0  | 1 | 0  | 1 | 0  | 1 | 0  | 1 | 0  | 1 | 0  | 1 | 0  | 1 | 0  | 1 | 13.9 | 40.648 | 0      | 8.685    | 274980000 | 0         | 30172000  | 0        | 2.45E+08  | 0        | 1281600  | 0        | 11446000  |          |         |
| Q8IW87    | Q8IW87    | WD repeat and FYVE domain-containing protein 1     | WDFY1     | sp Q8IW87 | 4  | 4  | 4    | 0 | 1  | 0 | 4  | 0 | 1  | 0 | 4  | 0 | 1  | 0 | 4  | 0 | 1  | 0 | 4  | 0 | 1  | 0 | 4    | 12.9   | 46.323 | 0        | 10.535    | 274940000 | 0         | 6759900  | 0         | 2.68E+08 | 0        | 595880   | 0         | 11029000 |         |
| Q9BXF6    | Q9BXF6    | Rab11 family-interacting protein 5                 | RAB11FIP5 | sp Q9BXF6 | 11 | 11 | 11</ |   |    |   |    |   |    |   |    |   |    |   |    |   |    |   |    |   |    |   |      |        |        |          |           |           |           |          |           |          |          |          |           |          |         |

|           |        |                                                       |          |           |    |    |    |    |   |    |   |    |   |    |   |    |   |    |   |      |        |          |         |           |           |          |          |          |          |          |          |          |         |
|-----------|--------|-------------------------------------------------------|----------|-----------|----|----|----|----|---|----|---|----|---|----|---|----|---|----|---|------|--------|----------|---------|-----------|-----------|----------|----------|----------|----------|----------|----------|----------|---------|
| P48507    | P48507 | Glutamate-cysteine ligase regulatory subunit          | GCLM     | sp P48507 | 4  | 4  | 4  | 0  | 3 | 0  | 4 | 0  | 3 | 0  | 4 | 0  | 3 | 0  | 4 | 26.3 | 30.727 | 0        | 17.694  | 258870000 | 0         | 52675000 | 0        | 2.06E+08 | 0        | 5912100  | 0        | 7211200  |         |
| Q9NY88    | Q9NY88 | FAST kinase domain-containing protein 2               | FASTKD2  | sp Q9NY88 | 6  | 6  | 6  | 0  | 1 | 2  | 6 | 0  | 1 | 2  | 6 | 0  | 1 | 2  | 6 | 11.7 | 81.462 | 0        | 28.028  | 258590000 | 0         | 6644200  | 5163700  | 2.47E+08 | 0        | 831180   | 2633700  | 10740000 |         |
| Q9Y5X2    | Q9Y5X2 | Sorting nexin-8                                       | SNX8     | sp Q9Y5X2 | 4  | 4  | 0  | 0  | 4 | 0  | 4 | 0  | 0 | 4  | 0 | 0  | 4 | 0  | 4 | 13.8 | 52.569 | 0        | 16.658  | 257890000 | 0         | 0        | 19755000 | 2.38E+08 | 0        | 0        | 14572000 | 8497500  |         |
| Q9NR19    | Q9NR19 | Acetyl-coenzyme A synthetase, cytoplasmic             | ACSS2    | sp Q9NR19 | 5  | 5  | 5  | 0  | 1 | 0  | 5 | 0  | 1 | 0  | 5 | 0  | 1 | 0  | 5 | 11.8 | 78.579 | 0        | 10.542  | 257820000 | 0         | 1365900  | 0        | 2.56E+08 | 0        | 415200   | 0        | 10252000 |         |
| Q8IX01    | Q8IX01 | SURP and G-patch domain-containing protein 2          | SUGP2    | sp Q8IX01 | 4  | 4  | 4  | 0  | 1 | 3  | 4 | 0  | 1 | 3  | 4 | 0  | 1 | 3  | 4 | 4.2  | 120.21 | 0        | 7.0253  | 257790000 | 0         | 2173200  | 8604000  | 2.47E+08 | 0        | 1791800  | 12393000 | 1946800  |         |
| Q9UKV3    | Q9UKV3 | Apoptotic chromatin condensation inducer in the ACIN1 | ACIN1    | sp Q9UKV3 | 12 | 12 | 12 | 2  | 9 | 7  | 9 | 2  | 9 | 7  | 9 | 2  | 9 | 7  | 9 | 13.6 | 151.86 | 0        | 26.939  | 257290000 | 4403000   | 1.26E+08 | 13448000 | 1.14E+08 | 4694400  | 9867000  | 10803000 | 3883400  |         |
| Q13043    | Q13043 | Serine/threonine-protein kinase 4,Serine/threonine    | STK4     | sp Q13043 | 6  | 6  | 5  | 0  | 6 | 0  | 4 | 0  | 6 | 0  | 4 | 0  | 5 | 0  | 3 | 17   | 56.63  | 0        | 17.671  | 256110000 | 0         | 1.02E+08 | 0        | 1.55E+08 | 0        | 7071600  | 0        | 8237100  |         |
| Q9BR21    | Q9BR21 | Ubiquinol-cytochrome-c reductase complex asser        | UQCQC2   | sp Q9BR21 | 3  | 3  | 3  | 0  | 2 | 2  | 2 | 0  | 3 | 2  | 2 | 0  | 3 | 2  | 2 | 28.6 | 14.875 | 0        | 8.3984  | 255830000 | 0         | 93015000 | 4524700  | 1.58E+08 | 0        | 6471400  | 3965800  | 7312500  |         |
| Q9B061    | Q9B061 | Uncharacterized protein C19orf43                      | C19orf43 | sp Q9B061 | 6  | 6  | 6  | 1  | 5 | 3  | 5 | 1  | 5 | 3  | 5 | 1  | 5 | 3  | 5 | 60.2 | 18.419 | 0        | 19.371  | 255520000 | 1035300   | 1.12E+08 | 9147300  | 1.24E+08 | 10979000 | 6649000  | 9144300  | 4709000  |         |
| Q9W556    | Q9W556 | Histone-lysine N-methyltransferase SETD7              | SETD7    | sp Q9W556 | 5  | 5  | 5  | 0  | 5 | 1  | 4 | 0  | 5 | 1  | 4 | 0  | 5 | 1  | 4 | 19.7 | 40.772 | 0        | 22.176  | 255440000 | 0         | 78877000 | 10112000 | 1.66E+08 | 0        | 6645800  | 7658700  | 6289500  |         |
| Q9GZ79    | Q9GZ79 | Derlin-2                                              | DERL2    | sp Q9GZ79 | 2  | 2  | 2  | 0  | 1 | 0  | 2 | 0  | 1 | 0  | 2 | 0  | 1 | 0  | 2 | 17.2 | 27.567 | 0        | 56.326  | 255330000 | 0         | 70564000 | 0        | 1.85E+08 | 0        | 6274400  | 0        | 7597600  |         |
| Q13363    | Q13363 | C-terminal-binding protein 1                          | CTBP1    | sp Q13363 | 4  | 4  | 4  | 0  | 5 | 0  | 4 | 0  | 5 | 0  | 4 | 0  | 4 | 0  | 4 | 17.3 | 47.535 | 0        | 24.143  | 254810000 | 0         | 79109000 | 0        | 1.76E+08 | 0        | 775500   | 0        | 6349500  |         |
| P56556    | P56556 | NADH dehydrogenase [ubiquinone] 1 alpha subcc         | NDUFA6   | sp P56556 | 5  | 5  | 5  | 1  | 5 | 4  | 4 | 1  | 5 | 4  | 4 | 1  | 5 | 4  | 4 | 39.1 | 15.136 | 0        | 7.7489  | 253750000 | 1792800   | 1.42E+08 | 3978700  | 1.06E+08 | 3544400  | 12490000 | 2575100  | 2753400  |         |
| Q9Y697    | Q9Y697 | Cysteine desulfurase, mitochondrial                   | NFS1     | sp Q9Y697 | 5  | 5  | 5  | 0  | 4 | 0  | 5 | 0  | 4 | 0  | 5 | 0  | 4 | 0  | 5 | 14   | 50.195 | 0        | 13.839  | 253100000 | 0         | 38872000 | 0        | 2.14E+08 | 0        | 6509000  | 0        | 5277800  |         |
| Q14160    | Q14160 | Protein scribble homolog                              | SCRIB    | sp Q14160 | 10 | 10 | 10 | 9  | 1 | 7  | 1 | 9  | 1 | 7  | 1 | 9  | 1 | 6  | 1 | 8    | 10.3   | 174.88   | 0       | 43.368    | 253010000 | 1041400  | 1.04E+08 | 3243600  | 1.45E+08 | 1794700  | 9952900  | 0        | 4396400 |
| Q75145    | Q75145 | Liprin-alpha-3                                        | PPP1A3   | sp Q75145 | 15 | 15 | 13 | 11 | 3 | 11 | 1 | 11 | 3 | 11 | 1 | 11 | 2 | 9  | 0 | 15.6 | 133.49 | 0        | 1.4E+08 | 21631000  | 65224000  | 26145000 | 94797000 | 2669200  | 83695000 | 5397000  | 0        | 4396400  |         |
| Q96KR1    | Q96KR1 | Zinc finger RNA-binding protein                       | ZFR      | sp Q96KR1 | 11 | 11 | 11 | 1  | 7 | 6  | 9 | 1  | 7 | 6  | 9 | 1  | 7 | 6  | 9 | 21.1 | 117.01 | 0        | 41.328  | 252560000 | 594420    | 38183000 | 22010000 | 1.92E+08 | 2646700  | 3617300  | 11475000 | 8898000  |         |
| P82664    | P82664 | 28S ribosomal protein S10, mitochondrial              | MRPS10   | sp P82664 | 3  | 3  | 3  | 0  | 2 | 3  | 0 | 3  | 0 | 2  | 3 | 0  | 3 | 0  | 2 | 2.4  | 22.999 | 0        | 11.13   | 251960000 | 0         | 1.34E+08 | 1698000  | 1.01E+08 | 0        | 13279000 | 8089500  | 5954000  |         |
| P55265    | P55265 | Double-stranded RNA-specific adenosine deamin: ADAR   | ADAR     | sp P55265 | 8  | 8  | 8  | 1  | 6 | 7  | 7 | 1  | 6 | 7  | 7 | 1  | 6 | 7  | 7 | 8.7  | 136.06 | 0        | 24.153  | 251870000 | 1535400   | 89542000 | 32839000 | 1.28E+08 | 2063400  | 8801100  | 22304000 | 3589900  |         |
| A6NDG6    | A6NDG6 | Phosphoglycolate phosphatase                          | PGP      | sp A6NDG6 | 5  | 5  | 5  | 0  | 4 | 1  | 4 | 0  | 4 | 1  | 4 | 0  | 4 | 1  | 4 | 29   | 34.006 | 0        | 15.02   | 251790000 | 0         | 1.62E+08 | 847140   | 89408000 | 0        | 14441000 | 1123600  | 2920500  |         |
| P19022;P5 | P19022 | Cadherin-2                                            | CDH2     | sp P19022 | 6  | 6  | 6  | 0  | 5 | 1  | 3 | 0  | 5 | 1  | 3 | 0  | 5 | 1  | 3 | 15.1 | 99.808 | 0        | 39.895  | 250970000 | 0         | 1.61E+08 | 2241500  | 87350000 | 0        | 10959000 | 3246600  | 5118200  |         |
| Q9BRP1    | Q9BRP1 | Programmed cell death protein 2-like                  | PDCD2L   | sp Q9BRP1 | 5  | 5  | 5  | 0  | 4 | 1  | 5 | 0  | 4 | 1  | 5 | 0  | 4 | 1  | 5 | 20.4 | 39.416 | 0        | 20.038  | 250780000 | 0         | 92558000 | 4        | 1213700  | 1.57E+08 | 0        | 9414500  | 1918500  | 4097600 |
| Q8TD01    | Q8TD01 | ATP-dependent RNA helicase DDX54                      | DDX54    | sp Q8TD01 | 8  | 8  | 8  | 2  | 6 | 5  | 6 | 2  | 6 | 5  | 6 | 2  | 6 | 5  | 6 | 12.9 | 98.594 | 0        | 13.831  | 249900000 | 4210000   | 74657000 | 13945000 | 1.57E+08 | 7186500  | 4170000  | 10807000 | 4459100  |         |
| Q96573    | Q96573 | Paired amphipathic helix protein Sin3a                | SIN3A    | sp Q96573 | 8  | 8  | 8  | 2  | 6 | 1  | 7 | 2  | 6 | 1  | 7 | 2  | 6 | 1  | 7 | 10.1 | 145.17 | 0        | 30.709  | 249840000 | 2197100   | 45483000 | 734970   | 2.01E+08 | 4538800  | 5777400  | 1847300  | 2820300  |         |
| P51648;P3 | P51648 | Fatty aldehyde hydroxylase                            | ALDH3A2  | sp P51648 | 5  | 5  | 4  | 0  | 5 | 0  | 4 | 0  | 5 | 0  | 4 | 0  | 4 | 0  | 4 | 11.1 | 54.847 | 0        | 10.936  | 248660000 | 0         | 69718000 | 8191800  | 1.71E+08 | 0        | 7050800  | 5655300  | 5966500  |         |
| P11182    | P11182 | Liposamide acyltransferase component of branche       | DBT      | sp P11182 | 7  | 7  | 7  | 1  | 6 | 3  | 2 | 1  | 6 | 3  | 2 | 1  | 6 | 3  | 2 | 20.7 | 53.486 | 0        | 15.801  | 248550000 | 37485000  | 1.34E+08 | 10031000 | 6693800  | 0        | 7524200  | 10167000 | 3623800  |         |
| Q15276    | Q15276 | Rab GTPase-binding effector protein 1                 | RABEP1   | sp Q15276 | 7  | 7  | 7  | 0  | 7 | 1  | 5 | 0  | 7 | 1  | 5 | 0  | 7 | 1  | 5 | 11   | 5      | 0        | 24.663  | 247920000 | 0         | 95854000 | 419383   | 1.52E+08 | 0        | 5231900  | 3196600  | 6539400  |         |
| Q53H82    | Q53H82 | Beta-lactamase-like protein 2                         | LACTB2   | sp Q53H82 | 5  | 5  | 5  | 1  | 5 | 1  | 5 | 1  | 5 | 1  | 5 | 1  | 5 | 1  | 5 | 25.3 | 32.805 | 0        | 16.995  | 247420000 | 989080    | 1E+08    | 2693600  | 1.43E+08 | 0        | 8157800  | 2723700  | 4275700  |         |
| O15091    | O15091 | Mitochondrial ribonuclease P protein 3                | KIAA0391 | sp O15091 | 4  | 4  | 4  | 0  | 3 | 0  | 4 | 0  | 3 | 0  | 4 | 0  | 3 | 0  | 4 | 8.6  | 67.315 | 0        | 15.603  | 246830000 | 0         | 75587000 | 0        | 1.71E+08 | 0        | 7734800  | 0        | 4570000  |         |
| P56211    | P56211 | cAMP-regulated phosphoprotein 19                      | ARPP19   | sp P56211 | 3  | 2  | 2  | 0  | 3 | 0  | 3 | 0  | 2 | 0  | 3 | 0  | 2 | 0  | 2 | 50   | 12.323 | 0        | 10.306  | 246370000 | 0         | 79162000 | 0        | 1.67E+08 | 0        | 6225500  | 0        | 6190300  |         |
| Q96R26    | Q96R26 | Exosome complex component RRP43                       | EXOSC8   | sp Q96R26 | 4  | 4  | 4  | 3  | 4 | 4  | 4 | 3  | 4 | 4  | 4 | 3  | 4 | 4  | 4 | 24.6 | 30.039 | 0        | 20.64   | 246300000 | 19429000  | 81558000 | 22636000 | 1.23E+08 | 29999000 | 5079000  | 8269300  | 3527400  |         |
| Q9B7C0    | Q9B7C0 | Death-inducer obliterator 1                           | DIDO1    | sp Q9B7C0 | 9  | 9  | 9  | 0  | 4 | 4  | 9 | 0  | 4 | 4  | 9 | 0  | 4 | 4  | 9 | 8.6  | 243.87 | 0        | 32.92   | 245970000 | 0         | 30391000 | 11767000 | 2.04E+08 | 0        | 3981100  | 8038300  | 6948800  |         |
| Q9NY27    | Q9NY27 | Serine/threonine-protein phosphatase 4 regulato       | PPP4R2   | sp Q9NY27 | 5  | 5  | 5  | 0  | 5 | 0  | 4 | 0  | 5 | 0  | 4 | 0  | 5 | 0  | 4 | 19.2 | 46.898 | 0        | 18.683  | 245710000 | 0         | 86336000 | 0        | 1.59E+08 | 0        | 7865100  | 0        | 6299700  |         |
| Q14671;Q1 | Q14671 | Pumilio homolog 1                                     | PUM1     | sp Q14671 | 9  | 9  | 9  | 0  | 8 | 2  | 8 | 0  | 8 | 2  | 8 | 0  | 8 | 2  | 8 | 9.6  | 126.47 | 0        | 32.202  | 245600000 | 0         | 92868000 | 1932200  | 1.51E+08 | 0        | 7327600  | 4110900  | 3907100  |         |
| Q9Y6I3    | Q9Y6I3 | Epsin-1                                               | EPN1     | sp Q9Y6I3 | 5  | 5  | 5  | 0  | 5 | 0  | 5 | 0  | 5 | 0  | 4 | 0  | 4 | 0  | 4 | 10.2 | 60.293 | 0        | 7.3387  | 245280000 | 0         | 89188000 | 0        | 1.56E+08 | 0        | 6706300  | 0        | 575100   |         |
| P78330    | P78330 | Phosphoserine phosphatase                             | PSPH     | sp P78330 | 5  | 5  | 5  | 0  | 5 | 0  | 2 | 0  | 5 | 0  | 2 | 0  | 5 | 0  | 2 | 39.6 | 25.007 | 0        | 25.336  | 245210000 | 0         | 1.92E+08 | 0        | 52827000 | 0        | 13952000 | 0        | 4287800  |         |
| Q9H2J4    | Q9H2J4 | Phosducin-like protein 3                              | PDCL3    | sp Q9H2J4 | 5  | 5  | 5  | 0  | 3 | 0  | 5 | 0  | 3 | 0  | 5 | 0  | 3 | 0  | 5 | 31.4 | 27.614 | 0        | 66.55   | 245100000 | 0         | 54045000 | 0        | 1.91E+08 | 0        | 5984000  | 0        | 6637000  |         |
| Q9HOR6    | Q9HOR6 | Glutamyl-tRNA(Gln) amidotransferase subunit A         | QRS11    | sp Q9HOR6 | 4  | 4  | 4  | 0  | 4 | 0  | 3 | 0  | 4 | 0  | 3 | 0  | 4 | 0  | 3 | 10.6 | 57.46  | 0        | 11.757  | 245000000 | 0         | 64021000 | 0        | 1.81E+08 | 0        | 4309400  | 0        | 8776800  |         |
| Q04941    | Q04941 | Proteolipid protein 2                                 | PLP2     | sp Q04941 | 1  | 1  | 1  | 0  | 0 | 0  | 1 | 0  | 0 | 0  | 1 | 0  | 0 | 0  | 1 | 8.6  | 16.697 | 0.001159 | 2.8106  | 244800000 | 174750    | 0        | 2.45E+08 | 174750   | 0        | 0        | 0        | 0        | 1006000 |
| Q6XZF7    | Q6XZF7 | Dynamitin-binding protein                             | DNMBP    | sp Q6XZF7 | 9  | 9  | 9  | 0  | 9 | 0  | 9 | 0  | 9 | 0  | 9 | 0  | 9 | 0  | 9 | 9.3  | 177.35 | 0        | 41.852  | 244660000 | 0         | 0        | 0        | 2.45E+08 | 0        | 0        | 0        | 0        | 1006200 |
| Q9UJX3    | Q9UJX3 | Anaphase-promoting complex subunit 7                  | ANAPC7   | sp Q9UJX3 | 11 | 11 | 11 | 0  | 9 | 10 | 6 | 0  | 9 | 10 | 6 | 0  | 9 | 10 | 6 | 23   | 66.855 | 0        | 31.08   | 244660000 | 0         | 87190000 | 53232000 | 1.04E+08 | 0        | 7240200  | 34917000 | 5587100  |         |
| Q9NRX4    | Q9NRX4 | Zinc finger phosphohistidine phosphatase              | PHPT1    | sp Q9NRX4 | 4  | 4  | 4  | 0  | 4 | 0  | 4 | 0  | 4 | 0  | 4 | 0  | 4 | 0  | 4 | 44.8 | 13.832 | 0        | 15.692  | 244650000 | 0         | 1.34E+08 | 0        | 1.1E+08  | 0        | 11075000 | 0        | 5307700  |         |
| Q9UPT8    | Q9UPT8 | Zinc finger CCH domain-containing protein 4           | ZC3H4    | sp Q9UPT8 | 8  | 8  | 8  | 0  | 7 | 4  | 5 | 1  | 7 | 4  | 5 | 1  | 7 | 4  | 5 | 14   | 140.26 | 0        | 18.025  | 244620000 | 3762500   | 1.13E+08 | 10083000 | 1.51E+08 | 8299900  | 6483000  | 7346700  | 4328600  |         |
| Q15629    | Q1     |                                                       |          |           |    |    |    |    |   |    |   |    |   |    |   |    |   |    |   |      |        |          |         |           |           |          |          |          |          |          |          |          |         |

|                  |                  |                                                                            |          |          |    |    |    |   |   |   |    |   |   |   |    |   |   |   |      |        |        |          |           |           |           |            |          |          |          |          |          |         |         |
|------------------|------------------|----------------------------------------------------------------------------|----------|----------|----|----|----|---|---|---|----|---|---|---|----|---|---|---|------|--------|--------|----------|-----------|-----------|-----------|------------|----------|----------|----------|----------|----------|---------|---------|
| Q86T59           | Q86T59           | 395 ribosomal protein L52, mitochondrial                                   | MRLP52   | sjQ86T59 | 2  | 2  | 2  | 0 | 2 | 1 | 2  | 0 | 2 | 1 | 2  | 0 | 2 | 1 | 2    | 41.5   | 13.664 | 0        | 33.643    | 230170000 | 0         | 1.14E+08   | 3107400  | 1.13E+08 | 0        | 8343600  | 3872000  | 4590400 |         |
| Q5TC12           | Q5TC12           | ATP synthase mitochondrial F1 complex assembly ATPAF1                      | sjQ5TC12 | 6        | 6  | 6  | 0  | 6 | 0 | 0 | 0  | 0 | 0 | 0 | 0  | 0 | 0 | 0 | 0    | 4      | 24.1   | 36.436   | 0         | 20.354    | 229600000 | 0          | 9948000  | 0        | 1.35E+08 | 0        | 10041000 | 0       | 3865700 |
| A0A0G2JM         | A0A0G2JM         | HLA class II histocompatibility antigen, DR alpha chain HLA-DRA; tr A0A0G2 | sjA0A0G2 | 2        | 2  | 2  | 0  | 2 | 0 | 2 | 0  | 2 | 0 | 2 | 1  | 0 | 2 | 1 | 0    | 2      | 11.4   | 28.621   | 0         | 5.1899    | 229500000 | 0          | 1748000  | 0        | 2.28E+08 | 0        | 0        | 0       | 8214600 |
| P55196           | P55196           | Afafin                                                                     | MLLT4    | sjP55196 | 6  | 6  | 6  | 0 | 5 | 4 | 5  | 0 | 5 | 4 | 5  | 0 | 5 | 4 | 5    | 5      | 5.8    | 206.8    | 0         | 33.447    | 229250000 | 0          | 5082500  | 5834500  | 1.73E+08 | 0        | 4326200  | 6043000 | 5129700 |
| Q14254           | Q14254           | Flotillin-2                                                                | FLOT2    | sjQ14254 | 6  | 6  | 6  | 5 | 2 | 1 | 2  | 5 | 2 | 1 | 2  | 5 | 2 | 1 | 2    | 21.3   | 47.064 | 0        | 22.999    | 10976000  | 1.91E+08  | 10976000   | 1808000  | 25528000 | 1.91E+08 | 970540   | 422320   | 7315000 |         |
| Q9BTE6           | Q9BTE6           | Alanyl-L-arginine editing protein Aarsd1                                   | AARS1    | sjQ9BTE6 | 7  | 7  | 7  | 0 | 7 | 1 | 6  | 0 | 5 | 1 | 6  | 0 | 5 | 1 | 6    | 24.5   | 45.479 | 0        | 21.381    | 229040000 | 0         | 1.11E+08   | 450040   | 1.18E+08 | 0        | 5611500  | 1279700  | 8013100 |         |
| Q08170           | Q08170           | Serine/arginine-rich splicing factor 4                                     | SRSF4    | sjQ08170 | 8  | 4  | 2  | 8 | 5 | 7 | 8  | 1 | 4 | 3 | 4  | 1 | 4 | 3 | 4    | 15.4   | 56.678 | 0        | 7.3591    | 228970000 | 128510    | 1.8E+08    | 5089500  | 43754000 | 1431000  | 1287400  | 2483700  | 1754600 |         |
| Q9NUY8           | Q9NUY8           | TBC1 domain family member 23                                               | TBC1D23  | sjQ9NUY8 | 3  | 3  | 3  | 0 | 0 | 0 | 3  | 0 | 0 | 0 | 3  | 0 | 0 | 3 | 7.7  | 78.321 | 0      | 11.274   | 228790000 | 0         | 0         | 0          | 2.29E+08 | 0        | 0        | 0        | 0        | 9409100 |         |
| Q9H553           | Q9H553           | Alpha-1,3/1,6-mannosyltransferase ALG2                                     | ALG2     | sjQ9H553 | 5  | 5  | 5  | 0 | 1 | 1 | 5  | 0 | 1 | 1 | 5  | 0 | 1 | 1 | 5    | 19.2   | 47.091 | 0        | 17.537    | 228400000 | 0         | 8396100    | 1246600  | 2.19E+08 | 0        | 535390   | 569590   | 9469100 |         |
| P42892           | P42892           | Endothelin-converting enzyme 1                                             | ECE1     | sjP42892 | 6  | 6  | 6  | 0 | 0 | 0 | 6  | 0 | 0 | 0 | 0  | 0 | 0 | 0 | 6    | 11.4   | 87.163 | 0        | 31.662    | 228320000 | 0         | 1.6E+08    | 0        | 2.28E+08 | 0        | 0        | 0        | 938900  |         |
| P23270           | P23270           | NADPH:adenosine diphosphate reductase, mitochondrial FDXR                  | FDXR     | sjP23270 | 5  | 5  | 5  | 0 | 4 | 0 | 4  | 0 | 4 | 0 | 4  | 0 | 4 | 0 | 4    | 13.6   | 53.926 | 0        | 13.553    | 228140000 | 0         | 5404800    | 0        | 1.74E+08 | 0        | 4613700  | 0        | 7315000 |         |
| Q9H074           | Q9H074           | Polyadenylation factor protein-interacting protein PAIP1                   | PAIP1    | sjQ9H074 | 5  | 5  | 5  | 0 | 4 | 0 | 5  | 0 | 4 | 0 | 5  | 0 | 4 | 0 | 5    | 12.7   | 53.524 | 0        | 8.949     | 228050000 | 0         | 61129000   | 0        | 1.67E+08 | 0        | 46523700 | 0        | 5276900 |         |
| Q75940           | Q75940           | Survival of motor neuron-related-splicing factor 3 SMNDC1                  | sjQ75940 | 4        | 4  | 4  | 0  | 3 | 3 | 3 | 0  | 3 | 3 | 3 | 3  | 0 | 3 | 3 | 29.4 | 26.711 | 0      | 16.264   | 228050000 | 0         | 1.22E+08  | 10962000   | 95576000 | 0        | 9776400  | 7847300  | 4384500  |         |         |
| Q9NRX1           | Q9NRX1           | RNA-binding protein PNO1                                                   | PNO1     | sjQ9NRX1 | 3  | 3  | 3  | 0 | 2 | 3 | 3  | 0 | 2 | 1 | 3  | 0 | 2 | 1 | 3    | 16.7   | 27.924 | 0        | 10.052    | 227950000 | 0         | 41561000   | 6035500  | 1.8E+08  | 0        | 4835700  | 4467400  | 5833600 |         |
| P82930           | P82930           | 28S ribosomal protein S34, mitochondrial                                   | MRRP534  | sjP82930 | 6  | 6  | 6  | 2 | 6 | 4 | 5  | 2 | 6 | 4 | 5  | 2 | 6 | 4 | 5    | 36.2   | 25.65  | 0        | 17.278    | 227780000 | 18162000  | 1.39E+08   | 6173100  | 6431700  | 13191000 | 14886000 | 6611000  | 2532100 |         |
| Q8NH68           | Q8NH68           | Putative phospholipase B-like 2;Putative phospho                           | PLBD2    | sjQ8NH68 | 5  | 5  | 5  | 0 | 2 | 0 | 5  | 0 | 2 | 0 | 5  | 0 | 2 | 0 | 5    | 10.7   | 65.471 | 0        | 15.981    | 227360000 | 0         | 11458000   | 0        | 2.16E+08 | 0        | 3705900  | 0        | 6183100 |         |
| Q9H078           | Q9H078           | Caseinolytic peptidase B protein homolog                                   | CLPB     | sjQ9H078 | 9  | 9  | 9  | 2 | 7 | 1 | 5  | 2 | 7 | 1 | 5  | 2 | 7 | 1 | 5    | 17.7   | 78.728 | 0        | 62.652    | 227110000 | 8681300   | 1.27E+08   | 1327000  | 89944000 | 6350400  | 1023300  | 3392000  | 4505800 |         |
| A6NH12           | A6NH12           | Tubulin alpha chain-like 3                                                 | TUBA13   | sjA6NH12 | 4  | 1  | 1  | 1 | 4 | 4 | 0  | 1 | 1 | 1 | 1  | 1 | 1 | 1 | 1    | 8.3    | 49.908 | 0        | 67.899    | 227070000 | 0         | 11562000   | 3883900  | 1.36E+08 | 0        | 8405900  | 3049800  | 4456400 |         |
| Q8NFW8           | Q8NFW8           | N-cyfinneuraminatase cytidyltransferase                                    | CMAS     | sjQ8NFW8 | 4  | 4  | 4  | 0 | 4 | 2 | 4  | 0 | 4 | 2 | 4  | 0 | 4 | 2 | 4    | 12.9   | 48.379 | 0        | 25.543    | 226690000 | 0         | 54121000   | 1570900  | 1.57E+08 | 0        | 4519200  | 11331000 | 5927500 |         |
| O14578           | O14578           | Citron Rho-interacting kinase                                              | CIT      | sjO14578 | 10 | 10 | 10 | 0 | 2 | 4 | 10 | 0 | 2 | 4 | 10 | 0 | 2 | 4 | 10   | 6.3    | 23.413 | 0        | 1884800   | 226400000 | 0         | 1.08E+08   | 1749000  | 2.17E+08 | 0        | 2302900  | 6396300  | 5205200 |         |
| Q8WUAA           | Q8WUAA           | Peptidyl-prolyl cis-trans isomerase-like 4                                 | PP1L4    | sjQ8WUAA | 6  | 6  | 6  | 0 | 6 | 4 | 4  | 0 | 6 | 4 | 4  | 0 | 6 | 4 | 4    | 15.4   | 57.224 | 0        | 26.586    | 225970000 | 0         | 1.08E+08   | 1334300  | 1.04E+08 | 0        | 8463900  | 8843300  | 5497800 |         |
| O75616           | O75616           | GTPase Era, mitochondrial                                                  | ERAL1    | sjO75616 | 4  | 4  | 4  | 0 | 4 | 1 | 4  | 0 | 4 | 1 | 4  | 0 | 4 | 1 | 4    | 11.7   | 48.349 | 0        | 15.039    | 225930000 | 0         | 75000000   | 1911800  | 1.49E+08 | 0        | 3961100  | 3038900  | 7024200 |         |
| Q9NQX3           | Q9NQX3           | Gephyrin;Molybdopterin adenylyltransferase;Mo                              | GPNN     | sjQ9NQX3 | 5  | 5  | 5  | 0 | 4 | 1 | 5  | 0 | 4 | 1 | 5  | 0 | 4 | 1 | 5    | 10.7   | 79.748 | 0        | 24.277    | 225790000 | 0         | 63651000   | 114790   | 1.62E+08 | 0        | 7488400  | 970890   | 3891800 |         |
| O75326           | O75326           | Semaphorin-7A                                                              | SEMA7A   | sjO75326 | 6  | 6  | 6  | 0 | 0 | 1 | 6  | 0 | 0 | 1 | 6  | 0 | 0 | 1 | 6    | 11.9   | 74.823 | 0        | 27.856    | 225510000 | 0         | 2.833300   | 2.23E+08 | 0        | 0        | 2932800  | 8129100  |         |         |
| Q7L523;Q7L523;Q1 | Q7L523;Q7L523;Q1 | Ras-related GTP-binding protein A;Ras-related G1                           | CRAGA;RR | sjQ7L523 | 4  | 4  | 4  | 0 | 3 | 1 | 4  | 0 | 3 | 1 | 4  | 0 | 3 | 1 | 4    | 13.7   | 36.566 | 0        | 9.4497    | 225050000 | 0         | 43757000   | 1232500  | 1.9E+08  | 0        | 4199500  | 2728700  | 5162100 |         |
| Q9ULX6           | Q9ULX6           | A-kinase anchor protein B-like                                             | AKAP9B   | sjQ9ULX6 | 6  | 6  | 6  | 0 | 6 | 3 | 4  | 0 | 6 | 3 | 4  | 0 | 6 | 3 | 4    | 13.5   | 71.639 | 0        | 40.482    | 225010000 | 0         | 1.6E+08    | 5065600  | 59512000 | 0        | 11854000 | 5209200  | 2934000 |         |
| Q9BKX5           | Q9BKX5           | Bcl-2-like protein 13                                                      | BCL113   | sjQ9BKX5 | 4  | 4  | 4  | 0 | 2 | 0 | 4  | 0 | 2 | 0 | 4  | 0 | 2 | 0 | 4    | 13.6   | 52.713 | 0        | 10.979    | 224930000 | 0         | 2.15E+0000 | 0        | 2.03E+08 | 0        | 4942900  | 0        | 5232400 |         |
| Q4KW98           | Q4KW98           | 1-phosphatidylinositol 4,5-bisphosphate phospho                            | PLCH1    | sjQ4KW98 | 1  | 1  | 1  | 0 | 1 | 0 | 1  | 0 | 1 | 0 | 1  | 0 | 1 | 0 | 1    | 0.5    | 189.22 | 0.003082 | 2.101     | 224580000 | 0         | 5938400    | 0        | 1.65E+08 | 0        | 5234600  | 0        | 5178300 |         |
| Q92990           | Q92990           | Glomulin                                                                   | GLMN     | sjQ92990 | 4  | 4  | 4  | 0 | 4 | 0 | 4  | 0 | 4 | 0 | 4  | 0 | 4 | 0 | 4    | 7.9    | 68.207 | 0        | 13.824    | 224310000 | 0         | 9997800    | 0        | 1.24E+08 | 0        | 1003100  | 0        | 3895100 |         |
| O75592           | O75592           | E3 ubiquitin-protein ligase MYCBP2                                         | MYCBP2   | sjO75592 | 9  | 9  | 9  | 1 | 6 | 5 | 8  | 1 | 6 | 5 | 8  | 1 | 6 | 5 | 8    | 2.7    | 513.63 | 0        | 11.548    | 224190000 | 1289700   | 60203000   | 20332000 | 142E+08  | 4150000  | 4357300  | 13568000 | 4038800 |         |
| Q9BY77           | Q9BY77           | Polymerase delta-interacting protein 3                                     | POLIP3   | sjQ9BY77 | 10 | 10 | 10 | 4 | 8 | 5 | 4  | 8 | 5 | 4 | 8  | 5 | 4 | 8 | 5    | 33.5   | 46.089 | 0        | 38.087    | 224000000 | 42026000  | 1.2E+08    | 6833600  | 55219000 | 34405000 | 10477000 | 18181000 | 2763900 |         |
| Q9HA64           | Q9HA64           | Ketosamine 3-kinase                                                        | FNK3RP   | sjQ9HA64 | 6  | 6  | 6  | 0 | 6 | 4 | 6  | 0 | 6 | 4 | 6  | 0 | 6 | 4 | 6    | 24.6   | 34.412 | 0        | 18.999    | 223840000 | 0         | 86264000   | 6658300  | 1.31E+08 | 0        | 3718900  | 4291100  | 5850400 |         |
| O60645           | O60645           | Exocyst complex component 3                                                | EXO3C    | sjO60645 | 7  | 7  | 7  | 0 | 3 | 2 | 7  | 0 | 3 | 2 | 7  | 0 | 3 | 2 | 7    | 12.2   | 78.566 | 0        | 22.821    | 223830000 | 0         | 23649000   | 4512800  | 1.96E+08 | 0        | 3185400  | 3721100  | 6039800 |         |
| P26232           | P26232           | Catenin alpha-2                                                            | CTNNA2   | sjP26232 | 4  | 1  | 1  | 0 | 4 | 2 | 4  | 0 | 1 | 0 | 1  | 0 | 1 | 0 | 1    | 5.5    | 105.31 | 0        | 14.936    | 223800000 | 0         | 70414000   | 0        | 1.53E+08 | 0        | 6746400  | 0        | 5768600 |         |
| P29323;P5        | P29323           | Ephrin type-B receptor 2                                                   | EPH82    | sjP29323 | 8  | 8  | 8  | 0 | 1 | 8 | 0  | 1 | 8 | 0 | 1  | 8 | 0 | 1 | 8    | 10     | 117.49 | 0        | 20.672    | 223440000 | 0         | 51634000   | 1.72E+08 | 0        | 0        | 34838000 | 6259800  | 9158000 |         |
| P56378           | P56378           | 6.8 kDa mitochondrial proteolipid                                          | MP68     | sjP56378 | 3  | 3  | 3  | 0 | 2 | 0 | 3  | 0 | 2 | 0 | 3  | 0 | 2 | 0 | 3    | 48.3   | 6.662  | 0.000246 | 3.6573    | 222930000 | 0         | 1.1E+08    | 0        | 1.12E+08 | 0        | 11397000 | 0        | 2964100 |         |
| Q9B175           | Q9B175           | RNA-binding protein 10                                                     | RBM10    | sjQ9B175 | 8  | 8  | 8  | 2 | 7 | 5 | 7  | 2 | 7 | 5 | 7  | 2 | 7 | 5 | 7    | 15.4   | 103.37 | 0        | 22.812    | 222850000 | 4338500   | 75987000   | 18045000 | 1.24E+08 | 5680400  | 7541700  | 12417000 | 2641300 |         |
| Q7274A           | Q7274A           | PX domain-containing protein kinase-like protein                           | PXX      | sjQ7274A | 5  | 5  | 5  | 0 | 1 | 0 | 5  | 0 | 1 | 0 | 5  | 0 | 1 | 0 | 5    | 14.4   | 64.949 | 0        | 14.334    | 222730000 | 0         | 6661700    | 0        | 2.16E+08 | 0        | 0        | 0        | 8886100 |         |
| Q8NB90           | Q8NB90           | Spermatogenesis-associated protein 5                                       | SPATAS   | sjQ8NB90 | 8  | 8  | 8  | 0 | 7 | 1 | 7  | 6 | 8 | 0 | 7  | 6 | 8 | 0 | 7    | 13.4   | 97.903 | 0        | 19.864    | 222620000 | 0         | 71725000   | 19604000 | 1.31E+08 | 0        | 5927000  | 13576000 | 5392200 |         |
| Q9H814           | Q9H814           | Phosphorylated adapter RNA export protein                                  | PHAX     | sjQ9H814 | 8  | 8  | 8  | 0 | 8 | 4 | 6  | 0 | 8 | 4 | 6  | 0 | 8 | 4 | 6    | 30.7   | 44.402 | 0        | 16.872    | 222510000 | 0         | 93281000   | 7009900  | 1.22E+08 | 0        | 5599900  | 8201000  | 4158800 |         |
| Q8TCE6;Q1        | Q8TCE6;Q1        | Protein FAM45A;Protein FAM45B                                              | FAM45A;F | sjQ8TCE6 | 4  | 4  | 4  | 0 | 2 | 1 | 4  | 0 | 2 | 1 | 4  | 0 | 2 | 1 | 4    | 18.5   | 40.513 | 0        | 23.956    | 222500000 | 0         | 41088000   | 1330100  | 1.77E+08 | 0        | 2730500  | 2142800  | 7190300 |         |
| Q9BEY8           | Q9BEY8           | Cob(ly)rimic acid a,c-diamide adenosyltransferase                          | MMAB     | sjQ9BEY8 | 4  | 4  | 4  | 0 | 4 | 0 | 4  | 0 | 4 | 0 | 4  | 0 | 4 | 0 | 4    | 20     | 27.388 | 0        | 9.4084    | 222440000 | 0         | 1.4E+08    | 0        | 8242000  | 0        | 12001000 | 0        | 3731500 |         |
| Q70E73           | Q70E73           | Ras-associated and pleckstrin homology domains                             | RAPH1    | sjQ70E73 | 8  | 8  | 8  | 0 | 2 | 1 | 8  | 0 | 2 | 1 | 8  | 0 | 2 | 1 | 8    | 12.3   | 135.25 | 0        | 33.73     | 222330000 | 0         | 5294900    | 548050   | 2.16E+08 | 0        | 621400   | 439450   | 6939000 |         |
| Q14777           | Q14777           | Kinetochore protein NDC90 homolog                                          | NDC90    | sjQ14777 | 10 | 10 | 10 | 0 | 4 |   |    |   |   |   |    |   |   |   |      |        |        |          |           |           |           |            |          |          |          |          |          |         |         |

|           |          |                                                   |          |           |    |    |    |   |    |   |    |    |   |   |     |        |        |          |           |           |           |          |           |           |          |          |          |          |         |         |
|-----------|----------|---------------------------------------------------|----------|-----------|----|----|----|---|----|---|----|----|---|---|-----|--------|--------|----------|-----------|-----------|-----------|----------|-----------|-----------|----------|----------|----------|----------|---------|---------|
| Q96C90    | Q96C90   | Protein phosphatase 1 regulatory subunit 14B      | PPP1R14B | sp Q96C90 | 3  | 3  | 3  | 1 | 3  | 0 | 2  | 1  | 3 | 0 | 2   | 43.5   | 15.911 | 0        | 25.301    | 211130000 | 3933000   | 84337000 | 0         | 1.23E+08  | 6806600  | 3858900  | 0        | 5754400  |         |         |
| Q5T2E6    | Q5T2E6   | UFP6068 protein C10orf76                          | C10orf76 | sp Q5T2E6 | 5  | 5  | 0  | 0 | 2  | 0 | 5  | 0  | 2 | 0 | 5   | 12.8   | 78.71  | 0        | 36.69     | 210900000 | 0         | 4870000  | 0         | 2.06E+08  | 0        | 743480   | 0        | 8159000  |         |         |
| Q5C0D9    | Q5C0D9   | Ethanolaminephosphotransferase 1                  | EPT1     | sp Q5C0D9 | 2  | 2  | 0  | 1 | 1  | 2 | 0  | 1  | 1 | 2 | 0   | 9.8    | 45.228 | 0        | 14.995    | 210790000 | 0         | 34470000 | 5406500   | 1.71E+08  | 0        | 4460700  | 5333500  | 3906200  | 0       | 8196000 |
| Q9BWH6    | Q9BWH6   | RNA polymerase II-associated protein 1            | RPAP1    | sp Q9BWH6 | 8  | 8  | 8  | 0 | 6  | 0 | 8  | 0  | 6 | 0 | 8   | 9.6    | 152.75 | 0        | 21.922    | 210770000 | 0         | 45868000 | 0         | 1.65E+08  | 0        | 4490800  | 0        | 6334000  |         |         |
| Q9ULX3    | Q9ULX3   | RNA-binding protein NOB1                          | NOB1     | sp Q9ULX3 | 5  | 5  | 1  | 3 | 4  | 3 | 1  | 3  | 4 | 3 | 1   | 17.7   | 46.674 | 0        | 17.62     | 210630000 | 36188000  | 33256000 | 14763000  | 1.26E+08  | 29308000 | 7255800  | 7651300  | 10024000 |         |         |
| P29992;O5 | P29992   | Guanine nucleotide-binding protein subunit alpha  | GNAI1    | sp P29992 | 6  | 6  | 6  | 3 | 1  | 5 | 0  | 3  | 1 | 5 | 0   | 4      | 24.8   | 42.123   | 0         | 18.946    | 210320000 | 0        | 61650000  | 1163000   | 1.48E+08 | 0        | 0        | 0        | 5776200 |         |
| Q8WWC4    | Q8WWC4   | Uncharacterized protein C2orf47, mitochondrial    | C2orf47  | sp Q8WWC4 | 2  | 2  | 0  | 2 | 0  | 2 | 0  | 2  | 0 | 2 | 0   | 2      | 7.2    | 32.544   | 0         | 5.4616    | 210280000 | 0        | 86662000  | 0         | 1.24E+08 | 0        | 7031700  | 0        | 5691400 |         |
| Q92466    | Q92466   | DNA damage-binding protein 2                      | DMB2     | sp Q92466 | 3  | 3  | 3  | 0 | 1  | 0 | 3  | 0  | 1 | 0 | 3   | 11.7   | 47.863 | 0        | 13.416    | 210240000 | 0         | 67857000 | 0         | 1.42E+08  | 0        | 7898600  | 0        | 3938700  |         |         |
| Q9NUQ7    | Q9NUQ7   | Ufm1-specific protease 2                          | UFSF2    | sp Q9NUQ7 | 5  | 5  | 5  | 0 | 2  | 1 | 5  | 0  | 2 | 1 | 5   | 0      | 18.6   | 53.261   | 0         | 15.306    | 210180000 | 0        | 23605000  | 3548200   | 1.83E+08 | 0        | 8017300  | 3817200  | 5157600 |         |
| Q43148    | Q43148   | mRNA cap guanine-N7 methyltransferase             | RNMT     | sp Q43148 | 6  | 6  | 0  | 4 | 2  | 6 | 0  | 4  | 2 | 6 | 0   | 18.3   | 54.843 | 0        | 16.95     | 210080000 | 0         | 16999000 | 5187100   | 1.88E+08  | 0        | 2616700  | 2446500  | 7641000  |         |         |
| P48773    | P48773   | Heat shock 70 kDa protein 13                      | HSP13    | sp P48773 | 5  | 5  | 0  | 0 | 5  | 0 | 4  | 0  | 5 | 0 | 4   | 12.7   | 51.927 | 0        | 12.193    | 210050000 | 0         | 97387000 | 0         | 1.13E+08  | 0        | 8154200  | 0        | 5063600  |         |         |
| Q7L210    | Q7L210   | 75k snRNA methylphosphate capping enzyme          | MEPCE    | sp Q7L210 | 4  | 4  | 1  | 4 | 3  | 1 | 4  | 3  | 1 | 4 | 3   | 12.3   | 74.354 | 0        | 13.111    | 209190000 | 612140    | 60961000 | 9129200   | 1.39E+08  | 4676100  | 3870300  | 5473300  | 3796600  |         |         |
| Q14530    | Q14530   | Thioredoxin domain-containing protein 9           | TXNDQ9   | sp Q14530 | 4  | 4  | 4  | 0 | 3  | 1 | 4  | 0  | 3 | 1 | 4   | 22.1   | 26.534 | 0        | 33.686    | 209090000 | 0         | 18154000 | 2081800   | 1.89E+08  | 0        | 1798900  | 1293900  | 7673300  |         |         |
| Q9Y2Q9    | Q9Y2Q9   | 28S ribosomal protein S28, mitochondrial          | MRPS28   | sp Q9Y2Q9 | 3  | 3  | 3  | 0 | 3  | 2 | 3  | 0  | 3 | 2 | 3   | 23.5   | 20.843 | 0        | 16.068    | 208530000 | 0         | 98444000 | 7506200   | 1.06E+08  | 0        | 5792700  | 6862500  | 5116000  |         |         |
| Q9NP92    | Q9NP92   | 28S ribosomal protein S30, mitochondrial          | MRPS30   | sp Q9NP92 | 4  | 4  | 4  | 0 | 4  | 2 | 4  | 0  | 4 | 2 | 4   | 13     | 50.364 | 0        | 7.1401    | 207890000 | 0         | 50458000 | 4802500   | 1.53E+08  | 0        | 5015000  | 5126700  | 3810500  |         |         |
| Q75475    | Q75475   | PC4 and SFRS1-interacting protein                 | PSIP1    | sp Q75475 | 7  | 7  | 6  | 0 | 3  | 6 | 0  | 5  | 3 | 6 | 0   | 12.5   | 60.103 | 0        | 16.253    | 20760000  | 0         | 16.253   | 20760000  | 88858000  | 0        | 7614600  | 6476400  | 2459000  |         |         |
| P12109    | P12109   | Collagen alpha-1(VI) chain                        | COL6A1   | sp P12109 | 6  | 6  | 6  | 0 | 5  | 1 | 6  | 0  | 5 | 1 | 6   | 7.3    | 108.53 | 0        | 18.624    | 206900000 | 0         | 19601000 | 507830    | 1.87E+08  | 0        | 1710000  | 2574500  | 5466300  |         |         |
| P61962    | P61962   | DBD1- and CUL4-associated factor 7                | DCAF7    | sp P61962 | 5  | 5  | 5  | 0 | 5  | 5 | 1  | 0  | 5 | 1 | 0   | 1.7    | 38.926 | 0        | 13.094    | 206850000 | 0         | 1.53E+08 | 31125000  | 22457000  | 0        | 12076000 | 14203000 | 7263100  |         |         |
| Q8TD55    | Q8TD55   | Plectrokin homology domain-containing family O    | PLEKH02  | sp Q8TD55 | 6  | 6  | 6  | 0 | 6  | 3 | 0  | 6  | 3 | 0 | 6   | 3      | 19.8   | 53.349   | 0         | 40.758    | 206790000 | 0        | 128440000 | 78346000  | 0        | 0        | 85327000 | 4027000  | 0       |         |
| Q96EK9    | Q96EK9   | Protein KTI12 homolog                             | KTI12    | sp Q96EK9 | 7  | 7  | 7  | 0 | 4  | 1 | 7  | 0  | 4 | 1 | 7   | 25.7   | 38.615 | 0        | 23.073    | 206690000 | 0         | 20241000 | 534500    | 1.86E+08  | 0        | 1787500  | 497070   | 7504700  |         |         |
| P23634    | P23634   | Plasma membrane calcium-transporting ATPase 4     | ATP2B4   | sp P23634 | 15 | 7  | 7  | 1 | 9  | 3 | 15 | 1  | 7 | 1 | 7   | 16.3   | 137.92 | 0        | 14.039    | 206520000 | 3526600   | 5439700  | 10339000  | 1.82E+08  | 0        | 3026900  | 5950600  | 6149000  |         |         |
| P02751    | P02751   | Fibronectin;Anastellin;Ug1;Y1;Ug2;Yg1-Y3          | FN1      | sp P02751 | 10 | 10 | 10 | 2 | 0  | 5 | 9  | 2  | 0 | 5 | 9   | 7.2    | 273.32 | 0        | 33.607    | 206490000 | 6807200   | 0        | 18134000  | 1.87E+08  | 9027600  | 0        | 10176000 | 7255800  | 0       |         |
| P51809    | P51809   | Vesicle-associated membrane protein 7             | VAMP7    | sp P51809 | 3  | 3  | 3  | 0 | 3  | 0 | 3  | 0  | 3 | 0 | 3   | 18.2   | 24.935 | 0        | 9.1567    | 206460000 | 0         | 1.14E+08 | 0         | 92456000  | 0        | 9865400  | 0        | 3985800  |         |         |
| Q9BPJ6    | Q9BPJ6   | Hydroxyrimidinease-related protein 5              | DPYSL5   | sp Q9BPJ6 | 7  | 7  | 7  | 0 | 7  | 2 | 0  | 7  | 2 | 0 | 7   | 23.4   | 61.421 | 0        | 41.742    | 206220000 | 0         | 2.05E+08 | 1093900   | 0         | 0        | 18284000 | 532500   | 0        |         |         |
| Q75569    | Q75569   | Interferon-inducible double-stranded RNA-depen    | PKRRA    | sp Q75569 | 6  | 6  | 6  | 2 | 6  | 3 | 2  | 6  | 3 | 2 | 6   | 3      | 29.1   | 34.404   | 0         | 22.166    | 206000000 | 9130200  | 95943000  | 15563000  | 85362000 | 10552000 | 5439100  | 12210000 | 3355300 |         |
| P60520    | P60520   | Gamma-aminobutyric acid receptor-associated pr    | GABARAP1 | sp P60520 | 4  | 4  | 4  | 0 | 4  | 0 | 4  | 0  | 4 | 0 | 4   | 29.9   | 13.667 | 0        | 10.976    | 205800000 | 0         | 1.04E+08 | 0         | 1.02E+08  | 0        | 9229300  | 0        | 4128000  |         |         |
| Q13505    | Q13505   | Melanin-1                                         | MTX1     | sp Q13505 | 6  | 6  | 6  | 0 | 4  | 1 | 6  | 0  | 4 | 1 | 6   | 20     | 51.462 | 0        | 20.169    | 205580000 | 0         | 44579000 | 1233900   | 1.6E+08   | 0        | 3682600  | 3195700  | 4451000  |         |         |
| Q6N267;Q  | Q6N267;Q | Mitotic-spindle organizing protein 2B;Mitotic-sp  | MZT2B;M2 | sp Q6N267 | 5  | 5  | 5  | 0 | 4  | 1 | 4  | 0  | 4 | 1 | 4   | 56.3   | 16.225 | 0        | 14.072    | 205450000 | 0         | 77410000 | 3918100   | 1.24E+08  | 0        | 5713000  | 0        | 5669400  |         |         |
| Q9NYF8    | Q9NYF8   | Bcl-2-associated transcription factor 1           | BCLAF1   | sp Q9NYF8 | 10 | 10 | 10 | 2 | 10 | 6 | 2  | 10 | 6 | 2 | 10  | 6      | 12.7   | 106.12   | 0         | 15.808    | 205250000 | 7763200  | 1.15E+08  | 13277000  | 69676000 | 14724000 | 7021300  | 6202400  | 1277900 |         |
| Q13325;Q  | Q13325   | Interferon-induced protein with tetratricopeptide | IFIT5    | sp Q13325 | 3  | 3  | 3  | 0 | 3  | 0 | 3  | 0  | 3 | 0 | 3   | 6.2    | 55.846 | 0        | 18.392    | 205210000 | 0         | 48233000 | 0         | 1.57E+08  | 0        | 4344800  | 0        | 6362400  |         |         |
| Q96J17    | Q96J17   | Protein disulfide-isomerase TMX3                  | TMX3     | sp Q96J17 | 4  | 4  | 4  | 0 | 4  | 1 | 4  | 0  | 4 | 1 | 4   | 16.3   | 51.871 | 0        | 11.487    | 205040000 | 0         | 39117000 | 1162100   | 1.65E+08  | 0        | 2474900  | 2024900  | 6505300  |         |         |
| Q9BX40    | Q9BX40   | Protein LSM14 homolog B                           | LSM14B   | sp Q9BX40 | 6  | 6  | 6  | 1 | 3  | 5 | 4  | 1  | 3 | 5 | 4   | 28.3   | 42.07  | 0        | 26.712    | 204730000 | 29545000  | 54747000 | 33442000  | 86997000  | 30267000 | 8728600  | 13020000 | 8406000  |         |         |
| Q14997    | Q14997   | Proteasome activator complex subunit 4            | PSME4    | sp Q14997 | 9  | 9  | 9  | 1 | 7  | 0 | 6  | 1  | 7 | 0 | 6   | 6.3    | 211.33 | 0        | 30.315    | 204530000 | 5946600   | 68172000 | 0         | 1.3E+08   | 6667000  | 4812100  | 0        | 5840100  |         |         |
| P12235    | P12235   | ADP/ATP translocase 1                             | SLC25A4  | sp P12235 | 11 | 3  | 3  | 5 | 11 | 9 | 9  | 1  | 3 | 3 | 3   | 36.6   | 33.064 | 0        | 7.6277    | 204460000 | 293150    | 1.4E+08  | 9533600   | 54362000  | 1085900  | 15339000 | 3091300  | 1783200  | 0       |         |
| Q9Y399    | Q9Y399   | 28S ribosomal protein S2, mitochondrial           | MRPS2    | sp Q9Y399 | 7  | 7  | 7  | 2 | 7  | 3 | 5  | 2  | 7 | 3 | 5   | 19.6   | 33.249 | 0        | 13.273    | 204230000 | 8917800   | 9999000  | 5420200   | 88989000  | 10025000 | 7074000  | 4007900  | 3964700  |         |         |
| Q7Z7F7    | Q7Z7F7   | 39S ribosomal protein L55, mitochondrial          | MRPL55   | sp Q7Z7F7 | 2  | 2  | 2  | 0 | 2  | 1 | 2  | 0  | 2 | 1 | 2   | 18.8   | 15.128 | 0        | 5.1522    | 204160000 | 0         | 1.13E+08 | 1507600   | 89459000  | 0        | 7846300  | 3714400  | 3109400  |         |         |
| O00291;O  | O00291   | Huntingtin-interacting protein 1                  | HIP1     | sp O00291 | 6  | 6  | 6  | 0 | 6  | 1 | 0  | 6  | 0 | 6 | 8.8 | 116.22 | 0      | 76.248   | 203710000 | 0         | 8710200   | 0        | 1.95E+08  | 0         | 767790   | 0        | 8019700  |          |         |         |
| P46199    | P46199   | Translation initiation factor IF-2, mitochondrial | MTIF2    | sp P46199 | 7  | 7  | 7  | 0 | 5  | 0 | 7  | 0  | 5 | 0 | 7   | 13.5   | 81.316 | 0        | 20.838    | 203520000 | 0         | 58454000 | 0         | 1.45E+08  | 0        | 5816800  | 0        | 5301900  |         |         |
| Q9Y649    | Q9Y649   | Signal peptidase complex subunit 1                | SPCS1    | sp Q9Y649 | 2  | 2  | 2  | 1 | 2  | 1 | 2  | 1  | 2 | 1 | 2   | 10.1   | 18.298 | 0        | 7.9797    | 203200000 | 1328800   | 67603000 | 1041400   | 1.33E+08  | 2421900  | 6322200  | 1757600  | 2962500  |         |         |
| Q14137    | Q14137   | Ribosome biogenesis protein BOP1                  | BOP1     | sp Q14137 | 3  | 3  | 3  | 0 | 3  | 0 | 3  | 0  | 3 | 0 | 3   | 16     | 83.629 | 0        | 37.281    | 202860000 | 0         | 81210000 | 7341900   | 1.14E+08  | 0        | 4766900  | 7502100  | 4524200  |         |         |
| Q05086    | Q05086   | Ubiquitin-protein ligase E3A                      | UBE3A    | sp Q05086 | 11 | 11 | 11 | 0 | 7  | 1 | 9  | 1  | 7 | 1 | 9   | 16.8   | 100.69 | 0        | 57.262    | 202570000 | 22911000  | 63160000 | 2222200   | 1.14E+08  | 16371000 | 7787800  | 4500600  | 6029500  |         |         |
| Q9BC95    | Q9BC95   | Evolutionarily conserved signaling intermediate I | ECISIT   | sp Q9BC95 | 4  | 4  | 4  | 0 | 3  | 1 | 4  | 0  | 3 | 1 | 4   | 19.3   | 49.148 | 0        | 23.469    | 202390000 | 0         | 61300000 | 4082600   | 1.37E+08  | 0        | 5075200  | 4372600  | 4333600  |         |         |
| Q92692    | Q92692   | Nectin-2                                          | NPN2     | sp Q92692 | 2  | 2  | 2  | 0 | 1  | 0 | 2  | 0  | 1 | 0 | 2   | 5.8    | 57.741 | 0        | 7.2769    | 202250000 | 0         | 19953000 | 0         | 1.82E+08  | 0        | 0        | 0        | 7497100  |         |         |
| Q9H270    | Q9H270   | Vacuolar protein sorting-associated protein 11 ho | VPS11    | sp Q9H270 | 4  | 4  | 4  | 0 | 3  | 1 | 4  | 0  | 3 | 1 | 4   | 7.1    | 107.84 | 0        | 4.995     | 201400000 | 0         | 45170000 | 573370    | 1.55E+08  | 0        | 4285600  | 3055700  | 3449400  |         |         |
| P49418    | P49418   | Amphiphysin                                       | AMPH     | sp P49418 | 7  | 7  | 6  | 0 | 0  | 7 | 0  | 0  | 0 | 0 | 6   | 21.3   | 76.256 | 0        | 19.619    | 201920000 | 0         | 0        | 0         | 2.02E+08  | 0        | 0        | 0        | 8304300  |         |         |
| Q9BLU5    | Q9BLU5   | MAP kinase-interacting serine/threonine-protein   | MKNK1    | sp Q9BLU5 | 1  | 1  | 1  | 0 | 1  | 0 | 1  | 0  | 1 | 0 | 1   | 2.6    | 51.342 | 0.001164 | 0.09E+08  | 20689000  | 0         | 1.1E+08  | 0         | 1.0923000 | 71307000 | 0        | 13126000 | 2414500  |         |         |
| Q9H0J3    | Q9H0J3   | Magnesium transporter protein 1                   | MAGT1    | sp Q9H0J3 | 7  | 7  | 7  | 0 | 1  | 1 | 3  | 0  | 1 | 1 | 3   | 10.1   | 38.036 | 0        | 28.009    | 200940000 | 0         | 132      |           |           |          |          |          |          |         |         |

|           |         |                                                      |         |            |    |    |    |   |   |   |    |   |   |   |    |   |   |      |        |        |        |           |           |           |           |           |          |          |          |          |          |          |         |         |
|-----------|---------|------------------------------------------------------|---------|------------|----|----|----|---|---|---|----|---|---|---|----|---|---|------|--------|--------|--------|-----------|-----------|-----------|-----------|-----------|----------|----------|----------|----------|----------|----------|---------|---------|
| Q13425    | Q13425  | Beta-2-syntrophin                                    | SNTB2   | sj Q13425  | 5  | 5  | 5  | 0 | 4 | 0 | 5  | 0 | 4 | 0 | 5  | 0 | 4 | 0    | 5      | 13.1   | 57.949 | 0         | 10.317    | 191740000 | 0         | 32675000  | 0        | 1.59E+08 | 0        | 2725300  | 0        | 6051000  |         |         |
| Q9UKN8    | Q9UKN8  | General transcription factor 3C polypeptide 4        | GTFC3C4 | sj Q9UKN8  | 9  | 9  | 9  | 0 | 9 | 4 | 6  | 0 | 9 | 4 | 6  | 0 | 9 | 4    | 6      | 18.4   | 91.981 | 0         | 16.626    | 191740000 | 0         | 1.18E+08  | 5489300  | 68497000 | 0        | 7763800  | 0        | 2995500  |         |         |
| Q9Y2R9    | Q9Y2R9  | 28S ribosomal protein S7, mitochondrial              | MRP57   | sj Q9Y2R9  | 6  | 6  | 2  | 4 | 5 | 4 | 2  | 4 | 5 | 4 | 2  | 4 | 5 | 4    | 23.8   | 28.134 | 0      | 15.306    | 191700000 | 10813000  | 88667000  | 18417000  | 73500000 | 11311000 | 6771600  | 12149000 | 3808800  |          |         |         |
| P83111    | P83111  | Serine beta-lactamase-like protein LACTB, mitochond  | LACTB   | sj P83111  | 6  | 6  | 0  | 1 | 6 | 4 | 0  | 1 | 6 | 4 | 0  | 1 | 6 | 4    | 15     | 60.693 | 0      | 16.356    | 191610000 | 0         | 2025900   | 71580000  | 1.18E+08 | 0        | 1872300  | 47958000 | 3302800  |          |         |         |
| Q96CW5    | Q96CW5  | Gamma-tubulin complex component 3                    | TUBGCP3 | sj Q96CW5  | 7  | 7  | 0  | 0 | 6 | 2 | 7  | 0 | 6 | 2 | 7  | 0 | 6 | 2    | 11.2   | 103.57 | 0      | 26.38     | 191260000 | 0         | 70904000  | 4872900   | 1.16E+08 | 0        | 4255100  | 4804200  | 5158100  |          |         |         |
| Q8TEM1    | Q8TEM1  | Nuclear pore membrane glycoprotein 210               | NUP210  | sj Q8TEM1  | 5  | 5  | 5  | 0 | 5 | 1 | 1  | 0 | 5 | 1 | 1  | 0 | 5 | 1    | 3.3    | 205.11 | 0      | 9.1985    | 191260000 | 0         | 1.48E+08  | 9129400   | 33715000 | 0        | 1502300  | 3782500  | 1182600  |          |         |         |
| P46013    | P46013  | Antigen Ki-67                                        | MKI67   | sj P46013  | 11 | 11 | 11 | 2 | 9 | 9 | 10 | 2 | 9 | 9 | 10 | 2 | 9 | 9    | 10     | 6.2    | 358.69 | 0         | 17.833    | 191130000 | 16660300  | 4.46E+08  | 17692000 | 1.26E+08 | 1932800  | 3351700  | 13310000 | 478200   |         |         |
| P42330    | P42330  | Aldo-keto reductase family 1 member C3               | AKR1C3  | sj P42330  | 7  | 7  | 3  | 0 | 0 | 1 | 7  | 0 | 0 | 0 | 3  | 0 | 3 | 33.1 | 36.853 | 0      | 15.272 | 190580000 | 0         | 0         | 0         | 0         | 0        | 1.91E+08 | 0        | 0        | 0        | 7837700  |         |         |
| Q94766    | Q94766  | Galactosylglucosyltransferase protein 3-beta-glucuro | BGGAT3  | sj Q94766  | 7  | 7  | 7  | 0 | 5 | 5 | 6  | 0 | 5 | 5 | 6  | 0 | 5 | 5    | 6      | 32.5   | 37.121 | 0         | 21.233    | 190410000 | 0         | 29553000  | 10969000 | 1.5E+08  | 0        | 2879500  | 7652500  | 5606500  |         |         |
| Q8W47     | Q8W47   | Negative elongation factor C/D                       | NEFCD   | sj Q8W47   | 5  | 5  | 5  | 0 | 4 | 0 | 5  | 0 | 4 | 0 | 5  | 0 | 4 | 0    | 5      | 11.7   | 66.246 | 0         | 9.4882    | 189980000 | 0         | 63633000  | 0        | 1.24E+08 | 0        | 6730500  | 0        | 4168900  |         |         |
| Q9H118    | Q9H118  | Activating signal co-receptor 1 complex subunit 7    | ASC2    | sj Q9H118  | 8  | 8  | 8  | 1 | 5 | 5 | 7  | 1 | 5 | 5 | 7  | 1 | 5 | 5    | 7      | 16.9   | 86.359 | 0         | 39.482    | 189960000 | 0         | 694550    | 65217000 | 16067000 | 1.08E+08 | 2042700  | 4591100  | 9253800  |         |         |
| Q8W442    | Q8W442  | Charged multivesicular body protein 1a               | CHMP1A  | sj Q8W442  | 2  | 2  | 2  | 1 | 2 | 0 | 2  | 1 | 2 | 0 | 2  | 1 | 2 | 0    | 2      | 9.2    | 21.703 | 0         | 5.6132    | 189710000 | 148090    | 74553000  | 0        | 1.15E+08 | 344430   | 6261100  | 0        | 4844000  |         |         |
| Q9NVRO    | Q9NVRO  | Kelch-like protein 11                                | KLHL11  | sj Q9NVRO  | 9  | 9  | 9  | 2 | 2 | 2 | 8  | 3 | 2 | 2 | 8  | 3 | 2 | 2    | 8      | 3      | 17.9   | 80.147    | 0         | 25.278    | 189620000 | 20350000  | 30366000 | 87668000 | 51238000 | 7694100  | 3074200  | 69957000 | 3321500 |         |
| Q9BLU23   | Q9BLU23 | Lipase maturation factor 2                           | LMF2    | sj Q9BLU23 | 5  | 5  | 5  | 0 | 1 | 2 | 5  | 0 | 1 | 2 | 5  | 0 | 1 | 2    | 5      | 8.2    | 79.697 | 0         | 17.474    | 189310000 | 0         | 4552200   | 1.85E+08 | 0        | 0        | 6469200  | 4190000  | 0        | 0       |         |
| P12931;Q5 | P12931  | Proto-oncogene tyrosine-protein kinase Src           | SRC     | sj P12931  | 6  | 6  | 6  | 3 | 0 | 4 | 1  | 6 | 0 | 4 | 1  | 6 | 0 | 4    | 1      | 6      | 0      | 0         | 0         | 0         | 0         | 0         | 0        | 0        | 0        | 0        | 0        | 0        | 0       | 0       |
| P06280    | P06280  | Alpha-galactosidase A                                | GLA     | sj P06280  | 4  | 4  | 4  | 4 | 1 | 1 | 0  | 4 | 1 | 1 | 0  | 4 | 1 | 1    | 0      | 4      | 1      | 12.8      | 48.766    | 0         | 13.3      | 189240000 | 0        | 1.83E+08 | 3922900  | 0        | 1762700  | 161900   | 0       | 0       |
| Q96559    | Q96559  | Ran-binding protein 9                                | RANBP9  | sj Q96559  | 5  | 5  | 5  | 0 | 5 | 0 | 5  | 0 | 5 | 0 | 5  | 0 | 5 | 0    | 5      | 2      | 11     | 77.846    | 0         | 14.211    | 189180000 | 0         | 96495000 | 8172400  | 84509000 | 0        | 7031800  | 5175100  | 5266400 |         |
| Q16831    | Q16831  | Uridine phosphorylase 1                              | UPP1    | sj Q16831  | 6  | 6  | 6  | 0 | 1 | 2 | 6  | 0 | 1 | 2 | 6  | 0 | 1 | 2    | 6      | 22.9   | 33.934 | 0         | 10.689    | 188990000 | 0         | 1212100   | 1368600  | 1.86E+08 | 0        | 152500   | 606540   | 7933800  |         |         |
| Q9Y263    | Q9Y263  | Phospholipase A-2-activating protein                 | PLAA    | sj Q9Y263  | 9  | 9  | 9  | 0 | 5 | 0 | 9  | 0 | 5 | 0 | 9  | 0 | 5 | 0    | 9      | 15.1   | 87.156 | 0         | 23.751    | 188960000 | 0         | 45619000  | 0        | 1.43E+08 | 0        | 4476400  | 0        | 5439800  |         |         |
| Q9GZT4    | Q9GZT4  | Serine racemase                                      | SRR     | sj Q9GZT4  | 6  | 6  | 6  | 0 | 3 | 0 | 6  | 0 | 3 | 0 | 6  | 0 | 3 | 0    | 6      | 30     | 36.566 | 0         | 20.487    | 188660000 | 0         | 12759000  | 0        | 1.76E+08 | 0        | 2488000  | 0        | 5870600  |         |         |
| P43003    | P43003  | Excitatory amino acid transporter 1                  | SCL1A3  | sj P43003  | 3  | 3  | 3  | 0 | 0 | 0 | 3  | 0 | 0 | 0 | 3  | 0 | 0 | 0    | 3      | 8.9    | 59.572 | 0         | 8.2084    | 188540000 | 0         | 0         | 0        | 0        | 1.89E+08 | 0        | 0        | 0        | 7753700 |         |
| P10909    | P10909  | Clusterin;Clusterin beta chain;Clusterin alpha chain | CLU     | sj P10909  | 4  | 4  | 4  | 0 | 1 | 3 | 3  | 0 | 1 | 3 | 3  | 0 | 1 | 3    | 3      | 14     | 52.494 | 0         | 21.277    | 188040000 | 0         | 4937900   | 15018000 | 1.68E+08 | 0        | 1628000  | 9151400  | 6660200  |         |         |
| Q9BU14    | Q9BU14  | DNA-directed RNA polymerase III subunit RPB3         | POLR3C  | sj Q9BU14  | 4  | 4  | 4  | 0 | 3 | 0 | 3  | 0 | 3 | 0 | 3  | 0 | 3 | 0    | 3      | 12.2   | 60.611 | 0         | 12.462    | 187850000 | 0         | 43039000  | 0        | 1.45E+08 | 0        | 6373100  | 0        | 3376100  |         |         |
| Q9UN16    | Q9UN16  | Dual specificity protein phosphatase 12              | DUSP12  | sj Q9UN16  | 3  | 3  | 3  | 0 | 3 | 0 | 3  | 0 | 3 | 0 | 3  | 0 | 3 | 0    | 3      | 13.8   | 37.687 | 0         | 9.3953    | 187690000 | 0         | 17093000  | 0        | 1.71E+08 | 0        | 2428100  | 0        | 6094500  |         |         |
| P51003;Q5 | P51003  | Poly(A) polymerase alpha                             | PAPOLA  | sj P51003  | 7  | 7  | 7  | 0 | 4 | 0 | 5  | 0 | 4 | 0 | 5  | 0 | 4 | 0    | 5      | 13.3   | 82.842 | 0         | 43.804    | 187330000 | 0         | 58945000  | 0        | 1.28E+08 | 0        | 4586800  | 0        | 5907300  |         |         |
| Q57447    | Q57447  | E3 ubiquitin-protein ligase HECTD3                   | HECTD3  | sj Q57447  | 5  | 5  | 5  | 0 | 2 | 1 | 5  | 0 | 2 | 1 | 5  | 0 | 2 | 1    | 5      | 8.2    | 97.112 | 0         | 17.2      | 187220000 | 0         | 29759000  | 2232000  | 1.55E+08 | 0        | 3551800  | 0        | 5451500  |         |         |
| Q13576    | Q13576  | Ras GTPase-activating-like protein IQGAP2            | IQGAP2  | sj Q13576  | 6  | 6  | 5  | 5 | 1 | 6 | 0  | 1 | 1 | 5 | 0  | 1 | 1 | 5    | 0      | 1      | 5.1    | 180.58    | 0         | 20.103    | 186860000 | 2976500   | 62680000 | 0        | 1.21E+08 | 4808100  | 4437100  | 0        | 4249700 |         |
| Q9Y6M1    | Q9Y6M1  | Insulin-like growth factor 2 mRNA-binding protein    | IGFBP2  | sj Q9Y6M1  | 8  | 7  | 7  | 2 | 5 | 7 | 6  | 1 | 4 | 6 | 5  | 7 | 6 | 1    | 4      | 6      | 5      | 17.5      | 66.121    | 0         | 17.163    | 186310000 | 2064800  | 49308000 | 22245000 | 1.13E+08 | 11275000 | 3442300  | 8347800 | 2930000 |
| P40123    | P40123  | Adenylyl kinase-associated protein 2                 | CAF2    | sj P40123  | 6  | 6  | 5  | 0 | 5 | 1 | 6  | 0 | 4 | 0 | 5  | 0 | 4 | 0    | 5      | 15.1   | 52.823 | 0         | 11.482    | 186070000 | 0         | 79746000  | 0        | 1.06E+08 | 0        | 6727000  | 0        | 3775900  |         |         |
| Q6P1N9    | Q6P1N9  | Putative deoxyribonuclease TADTN1                    | TADTN1  | sj Q6P1N9  | 6  | 6  | 6  | 1 | 3 | 0 | 5  | 1 | 3 | 0 | 5  | 1 | 3 | 0    | 5      | 20.9   | 33.601 | 0         | 13.847    | 185780000 | 10539000  | 32223000  | 0        | 1.43E+08 | 11127000 | 5340700  | 0        | 2793800  |         |         |
| P57740    | P57740  | Nuclear pore complex protein Nup107                  | NUP107  | sj P57740  | 5  | 5  | 5  | 0 | 0 | 5 | 0  | 5 | 0 | 0 | 5  | 0 | 0 | 5    | 0      | 5      | 8.8    | 106.37    | 0         | 44.266    | 185730000 | 0         | 12260000 | 0        | 1.73E+08 | 0        | 1637000  | 0        | 6537100 |         |
| P78362;Q5 | P78362  | SRSF protein kinase 2;SRSF protein kinase 2 N-ter    | SRPK2   | sj P78362  | 5  | 4  | 4  | 1 | 3 | 4 | 5  | 0 | 2 | 3 | 4  | 5 | 0 | 2    | 3      | 4      | 9.6    | 77.526    | 0         | 13.427    | 185520000 | 0         | 21788000 | 7553700  | 1.56E+08 | 0        | 3601000  | 4743700  | 5705000 |         |
| Q86YP4    | Q86YP4  | Transcriptional repressor p66-alpha                  | GATAD2A | sj Q86YP4  | 8  | 8  | 7  | 1 | 8 | 5 | 6  | 1 | 8 | 5 | 6  | 1 | 8 | 5    | 6      | 18.8   | 68.600 | 0         | 30.251    | 185400000 | 3492200   | 78455000  | 8484400  | 94970000 | 70140000 | 3545700  | 4726900  | 2075000  | 0       |         |
| Q15286    | Q15286  | Ras-related protein Rab-35                           | RAB35   | sj Q15286  | 3  | 3  | 3  | 0 | 3 | 0 | 3  | 0 | 3 | 0 | 3  | 0 | 3 | 0    | 3      | 17.4   | 23.025 | 0         | 15.866    | 185210000 | 0         | 94846000  | 948800   | 89419000 | 0        | 6260700  | 3240500  | 3174300  |         |         |
| Q9HAN9    | Q9HAN9  | Nicotinamide/nicotinic acid mononucleotide ader      | NMNAT1  | sj Q9HAN9  | 5  | 5  | 5  | 0 | 2 | 5 | 4  | 0 | 2 | 5 | 4  | 0 | 2 | 5    | 4      | 22.9   | 31.932 | 0         | 11.803    | 184810000 | 0         | 21837000  | 5.05E+08 | 0        | 0        | 2346800  | 38595000 | 4293100  | 0       |         |
| Q6UXV4    | Q6UXV4  | MICOS complex subunit MIC27                          | APOOD   | sj Q6UXV4  | 8  | 8  | 8  | 0 | 4 | 0 | 8  | 0 | 4 | 0 | 8  | 0 | 4 | 0    | 8      | 43.3   | 29.159 | 0         | 23.219    | 183810000 | 0         | 29973000  | 0        | 1.54E+08 | 0        | 3441800  | 0        | 5527000  |         |         |
| P49773    | P49773  | Histidine triad nucleotide-binding protein 1         | HINT1   | sj P49773  | 3  | 3  | 3  | 2 | 3 | 2 | 3  | 2 | 3 | 2 | 3  | 2 | 3 | 2    | 3      | 30.2   | 13.802 | 0         | 14.851    | 183660000 | 71388000  | 68399000  | 1584700  | 24288000 | 54930000 | 15561000 | 5991200  | 3933800  |         |         |
| Q86U44    | Q86U44  | N6-adenosine-methyltransferase 70 kDa subunit        | METTL3  | sj Q86U44  | 6  | 6  | 6  | 0 | 6 | 1 | 4  | 0 | 6 | 1 | 4  | 0 | 6 | 1    | 4      | 20.7   | 64.473 | 0         | 17.455    | 183640000 | 0         | 71889000  | 2025700  | 1.1E+08  | 0        | 4731500  | 3519300  | 3961000  |         |         |
| Q95302;Q  | Q95302  | Peptidyl-prolyl cis-trans isomerase FKBP9            | FKBP9   | sj Q95302  | 6  | 6  | 6  | 0 | 1 | 4 | 0  | 1 | 4 | 0 | 1  | 4 | 0 | 1    | 4      | 0      | 6      | 16.8      | 63.083    | 0         | 18.423    | 183600000 | 0        | 3148500  | 0        | 1.8E+08  | 0        | 296410   | 0       | 7402400 |
| Q7Z7H5    | Q7Z7H5  | Transmembrane emp24 domain-containing prote          | TMED4   | sj Q7Z7H5  | 4  | 4  | 4  | 0 | 3 | 0 | 4  | 0 | 3 | 0 | 4  | 0 | 3 | 0    | 4      | 0      | 3      | 26        | 25.943    | 0         | 12.771    | 183390000 | 0        | 73809000 | 0        | 1.1E+08  | 0        | 6622100  | 0       | 4396000 |
| Q9NR69    | Q9NR69  | Aladin                                               | AAAS    | sj Q9NR69  | 4  | 4  | 4  | 0 | 4 | 2 | 4  | 0 | 4 | 2 | 4  | 0 | 4 | 2    | 4      | 10.4   | 59.573 | 0         | 14.277    | 183210000 | 0         | 33456000  | 2198500  | 1.46E+08 | 0        | 2651100  | 2377700  | 5560200  |         |         |
| Q9NR09    | Q9NR09  | Baculoviral IAP repeat-containing protein 6          | BIRC6   | sj Q9NR09  | 8  | 8  | 8  | 0 | 8 | 0 | 8  | 0 | 8 | 0 | 8  | 0 | 8 | 0    | 8      | 3.3    | 530.25 | 0         | 14.128    | 183210000 | 0         | 67711000  | 0        | 95501000 | 0        | 6880600  | 0        | 4778600  |         |         |
| Q8P265    | Q8P265  | Coilin-interacting protein 2 homolog B               | DIP2B   | sj Q8P265  | 8  | 8  | 8  | 0 | 2 | 0 | 8  | 0 | 2 | 0 | 8  | 0 | 2 | 0    | 8      | 8.3    | 171.49 | 0         | 25.569    | 182660000 | 0         | 8223000   | 0        | 1.75E+08 | 0        | 5485500  | 0        | 7256200  |         |         |
| Q15054    | Q15054  | DNA polymerase delta subunit 3                       | POLD3   | sj Q15054  | 5  |    |    |   |   |   |    |   |   |   |    |   |   |      |        |        |        |           |           |           |           |           |          |          |          |          |          |          |         |         |



|        |        |                                                          |           |           |    |   |   |    |   |    |    |   |   |   |   |   |   |   |      |        |        |          |           |           |           |           |          |          |          |          |         |         |   |         |
|--------|--------|----------------------------------------------------------|-----------|-----------|----|---|---|----|---|----|----|---|---|---|---|---|---|---|------|--------|--------|----------|-----------|-----------|-----------|-----------|----------|----------|----------|----------|---------|---------|---|---------|
| Q5V5T9 | Q5V5T9 | Obscurin                                                 | OBSCN     | sp Q5V5T9 | 2  | 2 | 2 | 0  | 2 | 1  | 2  | 0 | 2 | 1 | 2 | 0 | 2 | 1 | 2    | 0.3    | 868.47 | 0.001128 | 2.4182    | 157910000 | 0         | 69049000  | 6162700  | 82702000 | 0        | 5185900  | 5664200 | 2779000 |   |         |
| Q9UNP9 | Q9UNP9 | Peptidyl-prolyl cis-trans isomerase E                    | PIPE      | sp Q9UNP9 | 6  | 5 | 5 | 0  | 6 | 0  | 0  | 5 | 0 | 2 | 0 | 5 | 0 | 2 | 31.6 | 33.43  |        | 15.247   | 157890000 | 0         | 1.34E+08  | 0         | 23897000 | 0        | 10275000 | 0        | 2512000 |         |   |         |
| Q9UP83 | Q9UP83 | Conserved oligomeric Golgi complex subunit 5             | COG5      | sp Q9UP83 | 6  | 6 | 6 | 0  | 4 | 2  | 6  | 0 | 4 | 2 | 6 | 0 | 4 | 2 | 6    | 8.7    | 92.742 |          | 20.801    | 157510000 | 0         | 19523000  | 1323100  | 1.37E+08 | 0        | 2681200  | 0       | 4662000 |   |         |
| Q08188 | Q08188 | Protein-glutamine gamma-glutamyltransferase E; TGM3      | sp Q08188 | 9         | 9  | 9 | 0 | 1  | 9 | 0  | 0  | 1 | 9 | 0 | 1 | 9 | 0 | 0 | 16   | 76.631 |        | 33.032   | 157500000 | 0         | 17700000  | 139800000 | 0        | 0        | 1815400  | 93688000 | 0       |         |   |         |
| Q92541 | Q92541 | RNA polymerase-associated protein RTF1 homolog RTF1      | sp Q92541 | 7         | 7  | 7 | 0 | 2  | 5 | 0  | 0  | 7 | 2 | 5 | 0 | 7 | 2 | 5 | 10.6 | 80.313 |        | 19.751   | 157290000 | 0         | 97007000  | 5829600   | 54454000 | 0        | 6212400  | 6003400  | 2492300 |         |   |         |
| Q43913 | Q43913 | Origin recognition complex subunit 5                     | ORC5      | sp Q43913 | 4  | 4 | 4 | 1  | 3 | 0  | 0  | 2 | 1 | 3 | 0 | 2 | 1 | 3 | 0    | 2      | 10.8   | 50.282   |           | 10.545    | 157220000 | 35085000  | 61601000 | 0        | 60534000 | 0        | 5430000 | 0       |   |         |
| Q9NNW5 | Q9NNW5 | WD repeat-containing protein 6                           | WDR6      | sp Q9NNW5 | 4  | 4 | 4 | 0  | 4 | 3  | 4  | 0 | 4 | 3 | 4 | 0 | 4 | 3 | 4    | 8.4    | 121.72 |          | 11.38     | 157180000 | 0         | 40540000  | 7358600  | 1.09E+08 | 0        | 2993900  | 6581200 | 3437700 |   |         |
| Q9NQ78 | Q9NQ78 | Kinesin-like protein KIF13B                              | KIF13B    | sp Q9NQ78 | 9  | 9 | 8 | 0  | 1 | 1  | 9  | 0 | 1 | 1 | 9 | 0 | 0 | 8 | 7.4  | 202.79 |        | 23.123   | 157010000 | 0         | 7844600   | 1837800   | 1.47E+08 | 0        | 890760   | 1590900  | 5503600 |         |   |         |
| P09884 | P09884 | DNA polymerase alpha catalytic subunit                   | POLA1     | sp P09884 | 4  | 4 | 4 | 0  | 4 | 0  | 4  | 0 | 4 | 0 | 4 | 0 | 4 | 0 | 4    | 4      | 165.91 |          | 13.672    | 156870000 | 0         | 85977000  | 0        | 70894000 | 0        | 7541200  | 0       | 2953100 |   |         |
| P51948 | P51948 | CDK-activating kinase assembly factor MAT1               | MMAT1     | sp P51948 | 3  | 3 | 3 | 0  | 2 | 0  | 3  | 0 | 2 | 0 | 3 | 0 | 2 | 0 | 3    | 15.9   | 35.823 |          | 19.448    | 156660000 | 0         | 13713000  | 0        | 1.43E+08 | 0        | 3208500  | 0       | 3875700 |   |         |
| Q9Y2D4 | Q9Y2D4 | Exocyst complex component 6B                             | EXOC6B    | sp Q9Y2D4 | 5  | 5 | 5 | 0  | 2 | 0  | 5  | 0 | 2 | 0 | 5 | 0 | 2 | 0 | 5    | 8.5    | 94.2   |          | 19.73     | 156520000 | 0         | 13201000  | 0        | 1.43E+08 | 0        | 1163700  | 0       | 5894000 |   |         |
| Q9NWU5 | Q9NWU5 | 39S ribosomal protein L22, mitochondrial                 | MRL22     | sp Q9NWU5 | 3  | 3 | 3 | 1  | 1 | 1  | 3  | 1 | 1 | 3 | 1 | 1 | 1 | 3 | 1    | 19.9   | 23.64  |          | 9.4272    | 155990000 | 3272000   | 32850000  | 3009600  | 1.17E+08 | 4297700  | 3383700  | 2363300 | 2951400 |   |         |
| Q9BH55 | Q9BH55 | Retinol dehydrogenase 14                                 | RDH14     | sp Q9BH55 | 5  | 5 | 5 | 0  | 4 | 0  | 5  | 0 | 4 | 0 | 5 | 0 | 4 | 0 | 5    | 22.6   | 36.864 |          | 16.032    | 155960000 | 0         | 41959000  | 0        | 1.14E+08 | 0        | 4608300  | 0       | 3761800 |   |         |
| Q9S970 | Q9S970 | Phosphohydroxy 3-kinnase regulatory subunit 4            | PIK3R4    | sp Q9S970 | 4  | 4 | 4 | 0  | 4 | 1  | 2  | 0 | 4 | 1 | 2 | 0 | 4 | 1 | 2    | 3.8    | 153.1  |          | 12.903    | 155800000 | 0         | 31292000  | 3740400  | 1.21E+08 | 0        | 2693400  | 2589300 | 4955900 |   |         |
| Q43149 | Q43149 | Zinc finger ZZ-type and EF-hand domain-containing ZFEF1  | sp Q43149 | 4         | 4  | 4 | 0 | 3  | 0 | 4  | 0  | 3 | 0 | 4 | 0 | 3 | 0 | 4 | 2    | 331.07 |        | 4.7922   | 155720000 | 0         | 6236800   | 0         | 9332000  | 0        | 4875700  | 0        | 4459400 |         |   |         |
| Q14149 | Q14149 | MORC family CW-type zinc finger protein 3                | MORC3     | sp Q14149 | 2  | 2 | 2 | 0  | 1 | 0  | 1  | 0 | 1 | 0 | 1 | 0 | 1 | 0 | 1    | 3.7    | 107.11 |          | 7.6237    | 155530000 | 0         | 95740000  | 0        | 95785000 | 0        | 0        | 0       | 2458700 |   |         |
| Q43819 | Q43819 | Protein SCO2 homolog, mitochondrial                      | SCO2      | sp Q43819 | 6  | 6 | 6 | 1  | 6 | 3  | 4  | 1 | 6 | 3 | 4 | 1 | 6 | 3 | 4    | 26.3   | 29.81  |          | 11.434    | 155470000 | 253730    | 8309800   | 2800800  | 69315000 | 1303700  | 5201100  | 2006500 | 3800200 |   |         |
| Q16134 | Q16134 | Electron transfer flavoprotein-ubiquinone oxidoreductase | ETFHDH    | sp Q16134 | 3  | 3 | 3 | 0  | 2 | 0  | 2  | 0 | 2 | 0 | 2 | 0 | 2 | 0 | 2    | 6.3    | 68.495 |          | 9.9616    | 155170000 | 0         | 9865400   | 0        | 1.45E+08 | 0        | 0        | 0       | 5975600 |   |         |
| Q9Y276 | Q9Y276 | Mitochondrial chaperone BCS1                             | BCS1L     | sp Q9Y276 | 3  | 3 | 3 | 0  | 3 | 0  | 3  | 0 | 3 | 0 | 3 | 0 | 3 | 0 | 3    | 12.6   | 47.534 |          | 12.417    | 154870000 | 0         | 45876000  | 0        | 1.09E+08 | 0        | 0        | 0       | 4482500 |   |         |
| Q6YP21 | Q6YP21 | Kynurenine-oxoglutarate transaminase 3                   | CBL2      | sp Q6YP21 | 6  | 6 | 6 | 0  | 6 | 0  | 6  | 0 | 6 | 0 | 6 | 0 | 6 | 0 | 2    | 20     | 51.4   |          | 13.419    | 154870000 | 0         | 1.32E+08  | 0        | 22575000 | 0        | 11662000 | 0       | 0       |   |         |
| Q94804 | Q94804 | Serine/threonine-protein kinase 10                       | STK10     | sp Q94804 | 10 | 9 | 9 | 1  | 3 | 1  | 10 | 0 | 2 | 1 | 9 | 0 | 2 | 1 | 9    | 13.5   | 112.13 |          | 25.972    | 154860000 | 0         | 6601600   | 379430   | 1.48E+08 | 0        | 490800   | 243700  | 6184000 |   |         |
| Q9Y211 | Q9Y211 | Nischarin                                                | NISCH     | sp Q9Y211 | 2  | 2 | 2 | 1  | 2 | 0  | 2  | 1 | 2 | 0 | 2 | 1 | 2 | 0 | 2    | 1.7    | 166.63 | 0.000249 | 3.754     | 154690000 | 93853000  | 50851000  | 0        | 9986900  | 81064000 | 11195000 | 0       | 6487900 | 0 | 4858000 |
| Q8I281 | Q8I281 | ELMO domain-containing protein 2                         | ELMDD2    | sp Q8I281 | 4  | 4 | 4 | 0  | 4 | 0  | 4  | 0 | 4 | 0 | 4 | 0 | 4 | 0 | 4    | 14     | 34.96  |          | 6.9607    | 154590000 | 0         | 35194000  | 0        | 1.19E+08 | 0        | 3154500  | 0       | 4858000 |   |         |
| Q9H974 | Q9H974 | Queuine tRNA-ribosyltransferase subunit QTRT1            | QTRT1     | sp Q9H974 | 3  | 3 | 3 | 0  | 3 | 0  | 3  | 0 | 3 | 0 | 3 | 0 | 3 | 0 | 3    | 12.5   | 46.712 |          | 17.46     | 154480000 | 0         | 59297000  | 7944600  | 87244000 | 0        | 3995600  | 7497700 | 2661000 |   |         |
| Q9Y241 | Q9Y241 | HIG1 domain family member 1A, mitochondrial              | HIGD1A    | sp Q9Y241 | 1  | 1 | 1 | 0  | 1 | 1  | 1  | 0 | 1 | 1 | 1 | 0 | 1 | 1 | 1    | 19.4   | 10.143 |          | 3.8884    | 154430000 | 0         | 57637000  | 9353100  | 87444000 | 0        | 5080600  | 6285200 | 3996200 |   |         |
| Q9BZV1 | Q9BZV1 | UBX domain-containing protein 6                          | UBXN6     | sp Q9BZV1 | 4  | 4 | 4 | 0  | 2 | 0  | 4  | 0 | 2 | 0 | 4 | 0 | 2 | 0 | 4    | 18.4   | 49.753 |          | 21.759    | 154140000 | 0         | 13510000  | 0        | 1.41E+08 | 0        | 1808600  | 0       | 5165700 |   |         |
| P09234 | P09234 | U1 small nuclear ribonucleoprotein C                     | SNRPC     | sp P09234 | 2  | 2 | 2 | 1  | 2 | 1  | 2  | 1 | 2 | 1 | 2 | 1 | 2 | 1 | 1    | 13.2   | 17.394 |          | 8.5655    | 154140000 | 30349000  | 8556200   | 40325000 | 2874200  | 9514000  | 3187000  | 2124700 |         |   |         |
| P34896 | P34896 | Serine hydroxymethyltransferase, cytosolic               | SHMT1     | sp P34896 | 6  | 5 | 5 | 0  | 4 | 1  | 6  | 0 | 5 | 0 | 4 | 1 | 6 | 0 | 5    | 17.6   | 53.082 |          | 13.502    | 153900000 | 0         | 63826000  | 0        | 90074000 | 0        | 5783400  | 0       | 3547200 |   |         |
| Q6ZVW1 | Q6ZVW1 | Sterile alpha and TIR motif-containing protein 1         | SARM1     | sp Q6ZVW1 | 6  | 6 | 6 | 5  | 0 | 4  | 1  | 6 | 5 | 1 | 4 | 1 | 5 | 1 | 4    | 12.7   | 79.387 |          | 20.925    | 153880000 | 410720    | 12.7E+08  | 1326200  | 39578000 | 2928700  | 4927300  | 2458500 | 2535800 |   |         |
| Q15773 | Q15773 | Myeloid leukemia factor 2                                | MLF2      | sp Q15773 | 2  | 2 | 2 | 0  | 1 | 2  | 2  | 0 | 1 | 2 | 2 | 0 | 1 | 2 | 2    | 18.1   | 28.147 |          | 4.611     | 153350000 | 0         | 21979000  | 12031000 | 1.19E+08 | 0        | 3412200  | 7714500 | 3803400 |   |         |
| Q9Y977 | Q9Y977 | Mitochondrial intermediate peptidase                     | MIPEP     | sp Q9Y977 | 5  | 5 | 5 | 0  | 5 | 0  | 5  | 0 | 5 | 0 | 5 | 0 | 5 | 0 | 5    | 8.4    | 80.64  |          | 8.2762    | 153320000 | 0         | 65335000  | 0        | 8.99E+08 | 0        | 6009300  | 0       | 3368600 |   |         |
| Q9S967 | Q9S967 | Nuclear pore complex protein Nup88                       | NUP88     | sp Q9S967 | 4  | 4 | 4 | 0  | 2 | 1  | 4  | 0 | 2 | 1 | 4 | 0 | 2 | 1 | 4    | 9.7    | 83.541 |          | 28.577    | 153100000 | 0         | 21371000  | 1618700  | 1.3E+08  | 0        | 2002500  | 1392400 | 4927700 |   |         |
| O60524 | O60524 | Nuclear export mediator factor NEMF                      | NEMF      | sp O60524 | 8  | 8 | 8 | 1  | 4 | 2  | 8  | 1 | 4 | 2 | 8 | 1 | 4 | 2 | 8    | 8.3    | 12.95  |          | 13.083    | 153030000 | 789150    | 1995900   | 6436000  | 1.26E+08 | 0        | 2840400  | 5267600 | 3151700 |   |         |
| Q9NPF4 | Q9NPF4 | Probable tRNA N6-adenosine threonylcarbamoyl transferase | OSGEP     | sp Q9NPF4 | 5  | 5 | 5 | 0  | 5 | 1  | 0  | 5 | 1 | 0 | 5 | 1 | 0 | 5 | 1    | 24.8   | 36.426 |          | 16.696    | 153000000 | 0         | 6994900   | 1505500  | 81544000 | 0        | 5147500  | 0       | 4372000 |   |         |
| Q9Y4E6 | Q9Y4E6 | WD repeat-containing protein 7                           | WDR7      | sp Q9Y4E6 | 3  | 3 | 3 | 0  | 1 | 0  | 3  | 0 | 1 | 0 | 3 | 0 | 1 | 0 | 3    | 3.3    | 163.81 | 0.001157 | 2.7672    | 152960000 | 0         | 18111000  | 0        | 1.35E+08 | 0        | 1640100  | 0       | 5002200 |   |         |
| Q9NRG0 | Q9NRG0 | Chromatin accessibility complex protein 1                | CHRAC1    | sp Q9NRG0 | 4  | 4 | 4 | 0  | 4 | 0  | 4  | 0 | 4 | 0 | 4 | 0 | 4 | 0 | 4    | 45     | 14.71  |          | 9.3095    | 152410000 | 0         | 84331000  | 0        | 68080000 | 0        | 7266900  | 0       | 2966600 |   |         |
| Q15370 | Q15370 | Transcription elongation factor B polypeptide 2          | TCEB2     | sp Q15370 | 4  | 4 | 4 | 1  | 3 | 2  | 4  | 0 | 3 | 2 | 4 | 0 | 3 | 2 | 4    | 39     | 13.133 |          | 11.488    | 152270000 | 31204000  | 38931000  | 2979600  | 1.07E+08 | 4224600  | 2825500  | 2585500 | 3329000 |   |         |
| Q9NSC5 | Q9NSC5 | Home protein homolog 3                                   | HOMER3    | sp Q9NSC5 | 5  | 5 | 5 | 0  | 2 | 5  | 0  | 2 | 5 | 0 | 2 | 5 | 0 | 2 | 5    | 19.9   | 39.836 |          | 22.501    | 152230000 | 0         | 6649700   | 1.46E+08 | 0        | 0        | 5411000  | 3045000 | 5040000 |   |         |
| Q00013 | Q00013 | 55 kDa erythrocyte membrane protein                      | MPP1      | sp Q00013 | 4  | 4 | 4 | 0  | 2 | 0  | 4  | 0 | 2 | 0 | 4 | 0 | 2 | 0 | 4    | 15.5   | 52.296 |          | 23.2      | 152220000 | 0         | 35368000  | 0        | 1.17E+08 | 0        | 4560300  | 0       | 3363000 |   |         |
| Q8WU46 | Q8WU46 | Transmembrane protein 263                                | TMEM263   | sp Q8WU46 | 3  | 3 | 3 | 0  | 3 | 0  | 3  | 0 | 3 | 0 | 3 | 0 | 3 | 0 | 3    | 40.5   | 11.748 |          | 9.5909    | 152190000 | 0         | 86892000  | 0        | 65299000 | 0        | 7838100  | 0       | 2506800 |   |         |
| P42226 | P42226 | Signal transducer and activator of transcription 5       | STAT5B    | sp P42226 | 5  | 5 | 5 | 0  | 0 | 5  | 0  | 0 | 5 | 0 | 0 | 5 | 0 | 0 | 5    | 8.7    | 94.134 |          | 25.594    | 151950000 | 0         | 0         | 0        | 1.52E+08 | 0        | 0        | 0       | 6249100 |   |         |
| Q96F07 | Q96F07 | Cytoplasmic FMR1-interacting protein 2                   | CFIP2     | sp Q96F07 | 15 | 4 | 1 | 11 | 2 | 15 | 1  | 3 | 0 | 4 | 1 | 3 | 0 | 4 | 1    | 14.6   | 148.4  |          | 10.891    | 151720000 | 218430    | 33071000  | 0        | 1.18E+08 | 1510600  | 3984800  | 0       | 2508900 |   |         |
| P48426 | P48426 | Phosphatidylinositol 5-phosphatase 4-kinase type-2       | PIP4K2A   | sp P48426 | 5  | 3 | 3 | 0  | 5 | 0  | 3  | 0 | 5 | 0 | 3 | 0 | 5 | 0 | 3    | 15.8   | 46.224 |          | 9.5716    | 151700000 | 0         | 29485000  | 0        | 1.22E+08 | 0        | 3291200  | 0       | 4931100 |   |         |
| Q96927 | Q96927 | COP9 signalosome complex subunit 8                       | COPS8     | sp Q96927 | 2  | 2 | 2 | 0  | 2 | 0  | 2  | 0 | 2 | 0 | 2 | 0 | 2 | 0 | 2    | 17.2   | 23.225 |          | 6.316     | 151540000 | 0         | 52865000  | 0        | 98674000 | 0        | 4373500  | 0       | 4344700 |   |         |
| P42566 | P42566 | Epidermal growth factor receptor substrate 1             |           |           |    |   |   |    |   |    |    |   |   |   |   |   |   |   |      |        |        |          |           |           |           |           |          |          |          |          |         |         |   |         |



|         |         |                                                    |           |     |        |   |   |   |   |   |   |   |   |   |   |   |   |   |   |   |   |   |   |   |   |   |   |     |        |          |          |           |           |           |          |           |           |          |          |          |         |         |         |
|---------|---------|----------------------------------------------------|-----------|-----|--------|---|---|---|---|---|---|---|---|---|---|---|---|---|---|---|---|---|---|---|---|---|---|-----|--------|----------|----------|-----------|-----------|-----------|----------|-----------|-----------|----------|----------|----------|---------|---------|---------|
| A8MXV4  | A8MXV4  | Nucleoside diphosphate-linked moiety X motif 19    | NUDT19    | spl | A8MXV  | 5 | 5 | 5 | 0 | 4 | 1 | 4 | 0 | 4 | 1 | 4 | 0 | 4 | 1 | 4 | 0 | 4 | 1 | 4 | 0 | 4 | 1 | 4   | 21.9   | 42.233   | 0        | 15.443    | 144700000 | 0         | 75186000 | 1064800   | 68448000  | 0        | 3987200  | 3724300  | 2446500 |         |         |
| Q6PJT7  | Q6PJT7  | Zinc finger CCH domain-containing protein 14       | ZC3H14    | spl | Q6PJT7 | 5 | 5 | 5 | 1 | 4 | 1 | 5 | 1 | 4 | 1 | 5 | 1 | 4 | 1 | 5 | 1 | 4 | 1 | 5 | 1 | 4 | 1 | 5   | 9.1    | 82.875   | 0        | 11.427    | 144210000 | 662820    | 48011000 | 1797800   | 93738000  | 1564900  | 4048400  | 2200800  | 2176800 |         |         |
| Q9H6R4  | Q9H6R4  | Nucleolar protein 6                                | NOL6      | spl | Q9H6R4 | 7 | 7 | 7 | 1 | 7 | 7 | 1 | 7 | 7 | 1 | 7 | 7 | 1 | 7 | 7 | 1 | 7 | 7 | 1 | 7 | 7 | 1 | 7   | 9.1    | 127.505  | 0        | 17.837    | 144160000 | 1110800   | 9861500  | 26419000  | 1076708   | 3532000  | 1912000  | 14725000 | 3165000 | 3740000 |         |
| Q8ND56  | Q8ND56  | Protein LSM14A homolog A                           | LSM14A    | spl | Q8ND56 | 3 | 3 | 3 | 0 | 3 | 3 | 2 | 0 | 3 | 3 | 2 | 0 | 3 | 3 | 2 | 0 | 3 | 3 | 2 | 0 | 3 | 3 | 2   | 9.7    | 50.529   | 0        | 13.108    | 144070000 | 0         | 63342000 | 17340000  | 63388000  | 0        | 5138100  | 11185000 | 3501400 |         |         |
| Q6UWP7  | Q6UWP7  | Lysocardiolipin acyltransferase 1                  | LCLAT1    | spl | Q6UWJ  | 4 | 4 | 4 | 1 | 3 | 3 | 0 | 4 | 1 | 3 | 0 | 4 | 1 | 3 | 0 | 4 | 1 | 3 | 0 | 4 | 1 | 3 | 0   | 4      | 11.1     | 48.92    | 0         | 7.5328    | 143920000 | 788760   | 40076000  | 0         | 1.03E+08 | 2720000  | 2765200  | 0       | 3074400 |         |
| Q9Y3E7  | Q9Y3E7  | Charged multivesicular body protein 3              | CHMP3     | spl | Q9Y3E2 | 4 | 4 | 4 | 0 | 3 | 2 | 4 | 0 | 3 | 2 | 4 | 0 | 3 | 2 | 4 | 0 | 3 | 2 | 4 | 0 | 3 | 2 | 4   | 28.4   | 25.073   | 0        | 22.319    | 143890000 | 0         | 15596000 | 3281300   | 1.25E+08  | 0        | 1938100  | 2970900  | 3812200 |         |         |
| Q9HD26  | Q9HD26  | Golgi-associated PDZ and coiled-coil motif-contain | GOPC      | spl | Q9HD2  | 7 | 7 | 7 | 0 | 2 | 6 | 0 | 2 | 6 | 0 | 2 | 6 | 0 | 2 | 6 | 0 | 2 | 6 | 0 | 2 | 6 | 0 | 2   | 6      | 22.7     | 50.519   | 0         | 34.747    | 143850000 | 0        | 18397000  | 2316700   | 1.23E+08 | 0        | 3299100  | 2637900 | 2305700 |         |
| Q92572  | Q92572  | AP-3 complex subunit sigma-1                       | AP3S1     | spl | Q92572 | 4 | 4 | 4 | 0 | 3 | 1 | 4 | 0 | 3 | 1 | 4 | 0 | 3 | 1 | 4 | 0 | 3 | 1 | 4 | 0 | 3 | 1 | 4   | 22.3   | 21.732   | 0        | 11.743    | 143820000 | 0         | 39700000 | 2419300   | 1.02E+08  | 0        | 2743500  | 2528000  | 4036300 |         |         |
| P36915  | P36915  | Guanine nucleotide-binding protein-like 1          | GNL1      | spl | P36915 | 4 | 4 | 4 | 0 | 3 | 1 | 4 | 0 | 3 | 1 | 4 | 0 | 3 | 1 | 4 | 0 | 3 | 1 | 4 | 0 | 3 | 1 | 4   | 8.4    | 68.66    | 0        | 14.488    | 143820000 | 0         | 93663000 | 2250200   | 47904000  | 0        | 7688000  | 1959400  | 2095000 |         |         |
| Q92979  | Q92979  | Ribosomal RNA small subunit methyltransferase 1    | ERM1      | spl | Q92975 | 3 | 3 | 3 | 1 | 3 | 1 | 2 | 1 | 3 | 1 | 2 | 1 | 3 | 1 | 2 | 1 | 3 | 1 | 2 | 1 | 3 | 1 | 2   | 16.8   | 26.72    | 0        | 8.508     | 143800000 | 1060500   | 30714000 | 768360    | 1.11E+08  | 2952200  | 2133000  | 1827100  | 1947700 |         |         |
| Q709C8  | Q709C8  | Vacuolar protein sorting-associated protein 13C    | VPS13C    | spl | Q709C1 | 9 | 9 | 9 | 0 | 1 | 9 | 0 | 1 | 9 | 0 | 1 | 9 | 0 | 1 | 9 | 0 | 1 | 9 | 0 | 1 | 9 | 0 | 1   | 9      | 3.5      | 42.339   | 0         | 22.457    | 143710000 | 0        | 26517000  | 459670    | 1.43E+08 | 0        | 0        | 388320  | 5813700 |         |
| Q6PJK6  | Q6PJK6  | BRCA1-associated ATM activator 1                   | BRAT1     | spl | Q6PJK4 | 6 | 6 | 6 | 1 | 6 | 0 | 2 | 1 | 6 | 0 | 2 | 1 | 6 | 0 | 2 | 1 | 6 | 0 | 2 | 1 | 6 | 0 | 2   | 6      | 9.7      | 88.118   | 0         | 25.018    | 143650000 | 0        | 26517000  | 1018800   | 1.16E+08 | 0        | 3022000  | 1728500 | 3046900 |         |
| Q6PD74  | Q6PD74  | Alpha- and gamma-adaptin-binding protein p34       | AAGAB     | spl | Q6PD70 | 2 | 2 | 2 | 0 | 2 | 0 | 2 | 0 | 2 | 0 | 2 | 0 | 2 | 0 | 2 | 0 | 2 | 0 | 2 | 0 | 2 | 0 | 2   | 13     | 34.993   | 0        | 9.3017    | 143200000 | 0         | 71504000 | 0         | 71691000  | 0        | 6347100  | 0        | 2904200 |         |         |
| Q71U9P0 | Q71U9P0 | Histone H2A.V/Histone H2A.Z                        | H2AFV;H2U | spl | Q71U19 | 3 | 1 | 1 | 3 | 3 | 0 | 1 | 1 | 1 | 1 | 1 | 1 | 1 | 1 | 1 | 1 | 1 | 1 | 1 | 1 | 1 | 1 | 1   | 20.3   | 13.509   | 0.001569 | 2.3362    | 143080000 | 0         | 39094000 | 13737000  | 86498000  | 0        | 2724200  | 9057400  | 3725700 |         |         |
| Q9H089  | Q9H089  | Large subunit GTPase 1 homolog                     | LSG1      | spl | Q9H08E | 5 | 5 | 5 | 0 | 4 | 4 | 3 | 0 | 4 | 4 | 3 | 0 | 4 | 4 | 3 | 0 | 4 | 4 | 3 | 0 | 4 | 4 | 3   | 12.9   | 75.225   | 0        | 16.475    | 143070000 | 0         | 34381000 | 17800000  | 90890000  | 0        | 2147800  | 12535000 | 4047600 |         |         |
| Q13595  | Q13595  | Transformer-2 protein homolog alpha                | TRA2A     | spl | Q1359E | 5 | 4 | 4 | 0 | 5 | 4 | 0 | 4 | 0 | 4 | 1 | 3 | 0 | 4 | 1 | 3 | 0 | 4 | 1 | 3 | 0 | 4 | 1   | 3      | 22.7     | 32.688   | 0         | 8.976     | 142960000 | 0        | 82938000  | 2279900   | 57450000 | 0        | 6583500  | 2577700 | 2052000 |         |
| Q9UEE9  | Q9UEE9  | Craniofacial development protein 1                 | CFDP1     | spl | Q9UEE1 | 4 | 4 | 4 | 0 | 4 | 0 | 2 | 0 | 4 | 0 | 2 | 0 | 4 | 0 | 2 | 0 | 4 | 0 | 2 | 0 | 4 | 0 | 2   | 20.1   | 33.592   | 0        | 7.7268    | 142930000 | 0         | 1.05E+08 | 0         | 38297000  | 0        | 8692900  | 0        | 2105100 |         |         |
| Q9H490  | Q9H490  | Phosphatidylinositol glycan anchor biosynthesis c  | PIGU      | spl | Q9H49E | 2 | 2 | 2 | 0 | 1 | 2 | 0 | 0 | 1 | 2 | 0 | 0 | 1 | 2 | 0 | 0 | 1 | 2 | 0 | 0 | 1 | 2 | 0   | 6.4    | 50.051   | 0        | 23.852    | 142880000 | 0         | 23.852   | 142880000 | 0         | 1101400  | 1.42E+08 | 0        | 0       | 1616000 | 4955000 |
| O00625  | O00625  | Pirin                                              | PIR       | spl | O0062E | 3 | 3 | 3 | 0 | 2 | 0 | 3 | 0 | 2 | 0 | 3 | 0 | 2 | 0 | 3 | 0 | 2 | 0 | 3 | 0 | 2 | 0 | 3   | 15.5   | 32.113   | 0.000717 | 3.2852    | 142680000 | 0         | 1.1E+08  | 0         | 33036000  | 0        | 9664600  | 0        | 0       |         |         |
| Q9H000  | Q9H000  | Probable E3 ubiquitin-protein ligase makorin-2     | MKR2      | spl | Q9H00E | 4 | 4 | 4 | 1 | 3 | 2 | 4 | 0 | 3 | 2 | 4 | 0 | 3 | 2 | 4 | 0 | 3 | 2 | 4 | 0 | 3 | 2 | 4   | 16.1   | 46.94    | 0        | 4.172     | 142670000 | 2041900   | 42528000 | 638950    | 97459000  | 0        | 3149300  | 2932300  | 2104600 |         |         |
| Q15121  | Q15121  | Astrocytic phosphoprotein PEA-15                   | PEA15     | spl | Q1512E | 2 | 2 | 2 | 0 | 0 | 2 | 0 | 0 | 2 | 0 | 0 | 2 | 0 | 0 | 2 | 0 | 0 | 2 | 0 | 0 | 2 | 0 | 0   | 2      | 27.7     | 15.04    | 0         | 11.746    | 142470000 | 0        | 0         | 0         | 0        | 1.42E+08 | 0        | 0       | 0       | 5859000 |
| Q9NZZ3  | Q9NZZ3  | Charged multivesicular body protein 5              | CHMP5     | spl | Q9NZZ2 | 1 | 1 | 1 | 0 | 1 | 1 | 0 | 0 | 1 | 1 | 0 | 0 | 1 | 1 | 0 | 0 | 1 | 1 | 0 | 0 | 1 | 1 | 0   | 8.2    | 24.57    | 0        | 4.3128    | 141930000 | 0         | 1.36E+08 | 5471200   | 0         | 0        | 1202800  | 3676600  | 0       | 0       |         |
| Q96GC5  | Q96GC5  | 39S ribosomal protein L48, mitochondrial           | MRPL48    | spl | Q96GC3 | 4 | 4 | 4 | 1 | 4 | 1 | 2 | 1 | 4 | 1 | 2 | 1 | 4 | 1 | 2 | 1 | 4 | 1 | 2 | 1 | 4 | 1 | 2   | 21.7   | 23.934   | 0        | 9.6158    | 141880000 | 770330    | 87834000 | 818160    | 52457000  | 0        | 4791400  | 2704000  | 2657200 |         |         |
| Q96H79  | Q96H79  | Zinc finger CCH-type antiviral protein 1-like      | ZC3HAV1L  | spl | Q96H7E | 5 | 5 | 5 | 0 | 4 | 1 | 2 | 0 | 4 | 1 | 2 | 0 | 4 | 1 | 2 | 0 | 4 | 1 | 2 | 0 | 4 | 1 | 2   | 32.3   | 32.962   | 0        | 29.531    | 141760000 | 0         | 1.15E+08 | 415450    | 25850000  | 0        | 8643900  | 1206400  | 1672400 |         |         |
| P27487  | P27487  | Dipeptidyl peptidase 4;Dipeptidyl peptidase 4 me   | DDP4      | spl | P27487 | 1 | 1 | 1 | 1 | 0 | 0 | 0 | 0 | 1 | 0 | 0 | 0 | 0 | 0 | 0 | 0 | 0 | 0 | 0 | 0 | 0 | 0 | 2.7 | 88.278 | 0.009845 | 1.5106   | 141330000 | 1.41E+08  | 0         | 0        | 0         | 0         | 1.41E+08 | 0        | 0        | 0       | 0       |         |
| Q9UGP4  | Q9UGP4  | LIM domain-containing protein 1                    | LIMD1     | spl | Q9UG1E | 3 | 3 | 3 | 0 | 0 | 0 | 0 | 0 | 3 | 0 | 0 | 0 | 0 | 0 | 0 | 0 | 0 | 0 | 0 | 0 | 0 | 0 | 3   | 11.2   | 72.189   | 0        | 39.387    | 141060000 | 0         | 0        | 0         | 0         | 1.41E+08 | 0        | 0        | 0       | 5801000 |         |
| Q15833  | Q15833  | Syntaxin-binding protein 2                         | STXB2     | spl | Q1583E | 5 | 5 | 5 | 0 | 5 | 0 | 5 | 0 | 5 | 0 | 5 | 0 | 5 | 0 | 5 | 0 | 5 | 0 | 5 | 0 | 5 | 0 | 5   | 1      | 12       | 66.452   | 0         | 12.633    | 140930000 | 0        | 85695000  | 0         | 5528000  | 0        | 7553900  | 0       | 2274200 |         |
| Q9P016  | Q9P016  | Thymocyte nuclear protein 1                        | THYN1     | spl | Q9P01E | 5 | 5 | 5 | 1 | 5 | 2 | 5 | 1 | 5 | 2 | 5 | 1 | 5 | 2 | 5 | 1 | 5 | 2 | 5 | 1 | 5 | 2 | 5   | 21.3   | 25.697   | 0        | 12.273    | 140960000 | 195550    | 9070500  | 1145800   | 48845000  | 232500   | 8581100  | 908660   | 1215700 |         |         |
| P49750  | P49750  | YLP motif-containing protein 1                     | YLP1      | spl | P49750 | 7 | 7 | 7 | 1 | 6 | 3 | 7 | 1 | 6 | 3 | 7 | 1 | 6 | 3 | 7 | 1 | 6 | 3 | 7 | 1 | 6 | 3 | 7   | 6.1    | 241.64   | 0        | 16.971    | 140880000 | 1391000   | 32752000 | 7403100   | 140880000 | 2031500  | 2092800  | 6101300  | 2879400 |         |         |
| Q60573  | Q60573  | Eukaryotic translation initiation factor 4E type 2 | EIF4E2    | spl | Q6057E | 3 | 3 | 3 | 1 | 3 | 1 | 3 | 1 | 3 | 1 | 3 | 1 | 3 | 1 | 3 | 1 | 3 | 1 | 3 | 1 | 3 | 1 | 3   | 22.9   | 28.362   | 0        | 7.0676    | 140810000 | 882550    | 23996000 | 5920400   | 1.1E+08   | 2815700  | 1086500  | 5104100  | 2093500 |         |         |
| Q9BTE1  | Q9BTE1  | Dynactin subunit 5                                 | DCTN5     | spl | Q9BTE2 | 2 | 2 | 2 | 0 | 2 | 2 | 0 | 2 | 0 | 2 | 0 | 2 | 0 | 2 | 0 | 2 | 0 | 2 | 0 | 2 | 0 | 2 | 0   | 11.5   | 20.126   | 0        | 5.8504    | 140700000 | 0         | 59012000 | 2638800   | 79003000  | 0        | 5185100  | 1824100  | 3242500 |         |         |
| Q8WVV3  | Q8WVV3  | Reticulon-4-interacting protein 1, mitochondrial   | RTN4IP1   | spl | Q8WVV2 | 3 | 3 | 3 | 0 | 1 | 0 | 3 | 0 | 1 | 0 | 3 | 0 | 1 | 0 | 3 | 0 | 1 | 0 | 3 | 0 | 1 | 0 | 3   | 13.4   | 43.589   | 0        | 5.9899    | 140470000 | 0         | 2708700  | 0         | 1.38E+08  | 0        | 1257300  | 0        | 4646500 |         |         |
| P06312  | P06312  | Ig kappa chain V-Iv region                         | IGKV4-1   | spl | P06312 | 3 | 3 | 3 | 1 | 0 | 2 | 1 | 0 | 2 | 1 | 0 | 2 | 1 | 0 | 2 | 1 | 0 | 2 | 1 | 0 | 2 | 1 | 0   | 19.8   | 13.38    | 0        | 9.7706    | 140440000 | 45613000  | 0        | 91418000  | 3407600   | 0        | 0        | 61285000 | 2876900 | 0       |         |
| Q9UKM7  | Q9UKM7  | Endoplasmic reticulum mannosyl-oligosaccharide     | MAN1B1    | spl | Q9UKM6 | 5 | 5 | 5 | 0 | 1 | 3 | 5 | 0 | 1 | 3 | 5 | 0 | 1 | 3 | 5 | 0 | 1 | 3 | 5 | 0 | 1 | 3 | 5   | 11.6   | 79.579   | 0        | 47.293    | 140360000 | 0         | 3923100  | 4326000   | 1.32E+08  | 0        | 580590   | 2244000  | 5861400 |         |         |
| Q9Y6K9  | Q9Y6K9  | NF-kappa-B essential modulator                     | IKBK      | spl | Q9Y6K6 | 5 | 5 | 5 | 2 | 5 | 2 | 5 | 0 | 5 | 2 | 5 | 0 | 5 | 2 | 5 | 0 | 5 | 2 | 5 | 0 | 5 | 2 | 5   | 16     | 48.197   | 0        | 30.25     | 140310000 | 1197600   | 75556000 | 1241300   | 62312000  | 1767300  | 5926800  | 1506500  | 2053900 |         |         |
| Q9Y5Q8  | Q9Y5Q8  | General transcription factor 3C polypeptide 5      | GTF3C5    | spl | Q9Y5Q6 | 6 | 6 | 6 | 0 | 5 | 2 | 5 | 0 | 5 | 2 | 5 | 0 | 5 | 2 | 5 | 0 | 5 | 2 | 5 | 0 | 5 | 2 | 5   | 14.3   | 59.57    | 0        | 11.846    | 140260000 | 0         | 73045000 | 6727100   | 60439000  | 0        | 3819500  | 6860600  | 1721900 |         |         |
| Q9H0C8  | Q9H0C8  | Integrin-linked kinase-associated serine/threonin  | ILKAP     | spl | Q9H0C6 | 6 | 6 |   |   |   |   |   |   |   |   |   |   |   |   |   |   |   |   |   |   |   |   |     |        |          |          |           |           |           |          |           |           |          |          |          |         |         |         |

|           |           |                                                               |          |           |    |   |   |   |    |   |   |   |   |   |   |      |        |          |        |           |           |           |           |          |          |          |          |         |         |         |
|-----------|-----------|---------------------------------------------------------------|----------|-----------|----|---|---|---|----|---|---|---|---|---|---|------|--------|----------|--------|-----------|-----------|-----------|-----------|----------|----------|----------|----------|---------|---------|---------|
| Q96555    | Q96555    | ATPase WRNIP1                                                 | WRNIP1   | sj Q96555 | 6  | 6 | 6 | 4 | 5  | 0 | 0 | 4 | 5 | 0 | 0 | 12   | 72.132 | 0        | 20.304 | 133700000 | 75437000  | 58264000  | 0         | 0        | 74033000 | 6539400  | 0        | 0       |         |         |
| Q8IVF7    | Q8IVF7    | Formin-like protein 3                                         | FMNL3    | sj Q8IVF7 | 4  | 4 | 3 | 0 | 0  | 2 | 4 | 0 | 0 | 1 | 3 | 4    | 117.21 | 0        | 7.604  | 133620000 | 0         | 12993000  | 1.21E+08  | 0        | 0        | 9620100  | 4072400  | 0       |         |         |
| Q9BUT1    | Q9BUT1    | 3-hydroxybutyrate dehydrogenase type 2                        | BDH2     | sj Q9BUT1 | 5  | 5 | 5 | 0 | 5  | 0 | 3 | 0 | 5 | 0 | 3 | 28.6 | 26.724 | 0        | 15.85  | 13360000  | 0         | 92975000  | 0         | 40621000 | 7099300  | 0        | 2766900  | 0       |         |         |
| Q9P260    | Q9P260    | Lish domain and HEAT repeat-containing protein                | KIAA1468 | sj Q9P260 | 6  | 6 | 6 | 0 | 6  | 0 | 5 | 0 | 6 | 0 | 5 | 6.2  | 134.63 | 0        | 11.273 | 133450000 | 0         | 52020000  | 0         | 81434000 | 0        | 4363000  | 0        | 3571200 |         |         |
| Q15287    | Q15287    | RNA-binding protein with serine-rich domain 1                 | RNPS1    | sj Q15287 | 3  | 3 | 3 | 1 | 2  | 3 | 2 | 1 | 2 | 3 | 2 | 11.5 | 34.208 | 0        | 10.818 | 133450000 | 7133200   | 82225000  | 11396000  | 32700000 | 7293200  | 0        | 8066700  | 6232500 | 1797900 |         |
| P42356:A4 | P42356    | Phosphatidylinositol 4-kinase alpha                           | PI4KA    | sj P42356 | 7  | 7 | 7 | 0 | 1  | 0 | 7 | 0 | 1 | 0 | 7 | 3.8  | 236.83 | 0        | 13.573 | 133290000 | 0         | 7129900   | 0         | 1.26E+08 | 0        | 861250   | 0        | 4959800 |         |         |
| Q13123    | Q13123    | Protein Red                                                   | IK       | sj Q13123 | 8  | 8 | 8 | 0 | 7  | 4 | 3 | 0 | 7 | 4 | 3 | 18.9 | 65.601 | 0        | 35.121 | 133170000 | 0         | 92277000  | 8768700   | 32166000 | 0        | 6937900  | 6245000  | 2163200 |         |         |
| P10606    | P10606    | Cytochrome c oxidase subunit 5B, mitochondrial                | COX5B    | sj P10606 | 5  | 5 | 5 | 0 | 5  | 0 | 3 | 0 | 5 | 0 | 3 | 25.6 | 13.696 | 0        | 11.034 | 133130000 | 0         | 88563000  | 0         | 44569000 | 0        | 6845900  | 0        | 2793700 |         |         |
| Q9H187    | Q9H187    | Interferon regulatory factor 2-binding protein-like IRF2BP1   | IRF2BP1  | sj Q9H187 | 7  | 7 | 7 | 0 | 1  | 0 | 7 | 0 | 1 | 0 | 7 | 14.2 | 82.658 | 0        | 23.146 | 133010000 | 0         | 3132600   | 0         | 1.3E+08  | 0        | 5674500  | 0        | 5049800 |         |         |
| P61966    | P61966    | AP-1 complex subunit sigma-1A                                 | AP1S1    | sj P61966 | 3  | 3 | 3 | 0 | 2  | 1 | 3 | 0 | 2 | 1 | 3 | 22.2 | 18.733 | 0        | 48.607 | 132600000 | 0         | 13059000  | 1725200   | 1.11E+08 | 0        | 1706700  | 0        | 4476300 |         |         |
| Q8TFC1    | Q8TFC1    | Protein CP2A                                                  | KIAA1524 | sj Q8TFC1 | 7  | 7 | 7 | 0 | 4  | 3 | 7 | 0 | 4 | 3 | 7 | 9.8  | 102.18 | 0        | 20.157 | 132600000 | 0         | 13059000  | 5157400   | 1.14E+08 | 0        | 2407100  | 0        | 2532100 |         |         |
| Q9G0C0    | Q9G0C0    | Serine/threonine-protein phosphatase 1 regulator PTP1B        | PPP1R10  | sj Q9G0C0 | 6  | 6 | 6 | 0 | 3  | 5 | 0 | 5 | 3 | 5 | 0 | 6.8  | 99.057 | 0        | 10.815 | 132450000 | 0         | 46609000  | 4825200   | 81012000 | 0        | 4165500  | 3911600  | 2605600 |         |         |
| Q9NS86    | Q9NS86    | LaN-C-like protein 2                                          | LANCL2   | sj Q9NS86 | 3  | 3 | 3 | 0 | 3  | 0 | 3 | 0 | 3 | 0 | 3 | 10   | 50.854 | 0        | 8.6798 | 132230000 | 0         | 50223000  | 0         | 82010000 | 0        | 4250300  | 0        | 3549600 |         |         |
| P27701    | P27701    | CD82 antigen                                                  | CD82     | sj P27701 | 1  | 1 | 1 | 0 | 0  | 0 | 1 | 0 | 0 | 0 | 1 | 5.2  | 29.625 | 0        | 3.9271 | 132170000 | 0         | 0         | 0         | 1.32E+08 | 0        | 0        | 0        | 5435600 |         |         |
| Q6P161    | Q6P161    | 39S ribosomal protein L54, mitochondrial                      | MRPL54   | sj Q6P161 | 1  | 1 | 1 | 0 | 1  | 1 | 0 | 0 | 1 | 1 | 0 | 18.8 | 15.819 | 0        | 22.035 | 132160000 | 0         | 1.2E+08   | 12485000  | 0        | 0        | 10549000 | 8389700  | 0       |         |         |
| Q9BT73    | Q9BT73    | Proteasome assembly chaperone 3                               | PSMG3    | sj Q9BT73 | 4  | 4 | 4 | 0 | 4  | 0 | 2 | 0 | 4 | 0 | 2 | 50.8 | 13.104 | 0        | 13.759 | 132020000 | 0         | 84857000  | 0         | 47160000 | 0        | 6837400  | 0        | 2582200 |         |         |
| Q60231    | Q60231    | Putative pre-mRNA-splicing factor ATP-dependent DDX16         | DDX16    | sj Q60231 | 8  | 7 | 7 | 1 | 7  | 1 | 6 | 0 | 6 | 0 | 5 | 9.5  | 119.26 | 0        | 19.272 | 131940000 | 0         | 67048000  | 0         | 64894000 | 0        | 5981200  | 0        | 2597800 |         |         |
| P06702    | P06702    | Protein S100-A9                                               | S100A9   | sj P06702 | 4  | 4 | 4 | 0 | 3  | 4 | 0 | 0 | 3 | 4 | 0 | 44.7 | 13.242 | 0        | 12.354 | 131930000 | 0         | 25126000  | 106800000 | 0        | 0        | 4666600  | 69319000 | 0       |         |         |
| P49247    | P49247    | Ribose-5-phosphate isomerase                                  | RPIA     | sj P49247 | 6  | 6 | 6 | 0 | 5  | 4 | 2 | 0 | 5 | 4 | 2 | 26   | 33.269 | 0        | 17.327 | 131680000 | 0         | 74201000  | 25074000  | 32401000 | 0        | 6612500  | 13167000 | 4944100 |         |         |
| Q8NFH3    | Q8NFH3    | Nucleoporin Nup43                                             | NUP43    | sj Q8NFH3 | 4  | 4 | 4 | 0 | 1  | 1 | 4 | 0 | 1 | 1 | 4 | 18.9 | 42.15  | 0        | 12.091 | 131640000 | 0         | 6338500   | 1510000   | 1.24E+08 | 0        | 1472900  | 1302300  | 3889100 |         |         |
| Q14651    | Q14651    | Plastin-1                                                     | PLS1     | sj Q14651 | 11 | 8 | 8 | 1 | 10 | 4 | 4 | 1 | 7 | 2 | 1 | 25.1 | 70.253 | 0        | 14.689 | 131500000 | 9651600   | 83866000  | 26996000  | 11169000 | 9924700  | 9932500  | 13607000 | 2165100 |         |         |
| Q9NX47    | Q9NX47    | E3 ubiquitin-protein ligase MARCH5                            | Mar-05   | sj Q9NX47 | 3  | 3 | 3 | 0 | 1  | 0 | 3 | 0 | 1 | 0 | 3 | 14.7 | 31.231 | 0        | 8.8518 | 131000000 | 0         | 30763000  | 0         | 1.01E+08 | 0        | 3186500  | 0        | 3677000 |         |         |
| Q9H054    | Q9H054    | Probable ATP-dependent RNA helicase DDX47                     | DDX47    | sj Q9H054 | 7  | 7 | 7 | 0 | 5  | 5 | 5 | 0 | 5 | 5 | 5 | 20.9 | 50.646 | 0        | 16.071 | 131140000 | 0         | 37310000  | 15736000  | 78099000 | 0        | 3779900  | 9990800  | 3304700 |         |         |
| Q9Y6N1    | Q9Y6N1    | Cytochrome c oxidase assembly protein COX11                   | COX11    | sj Q9Y6N1 | 3  | 3 | 3 | 0 | 3  | 0 | 2 | 0 | 3 | 0 | 2 | 16.7 | 31.43  | 0        | 10.817 | 130710000 | 0         | 77820000  | 0         | 52876000 | 0        | 6501100  | 0        | 2533200 |         |         |
| Q9UBU8    | Q9UBU8    | Mortality factor 4-like protein 1                             | MORF4L1  | sj Q9UBU8 | 3  | 3 | 2 | 0 | 2  | 1 | 3 | 0 | 2 | 1 | 3 | 0    | 10.5   | 41.473   | 0      | 6.825     | 130700000 | 0         | 22958000  | 1951300  | 1.06E+08 | 0        | 2919700  | 2216800 | 2548900 |         |
| Q9BY42    | Q9BY42    | Protein RTF2 homolog                                          | RTF2C1   | sj Q9BY42 | 2  | 2 | 2 | 0 | 2  | 0 | 2 | 0 | 2 | 0 | 2 | 9.5  | 33.886 | 0        | 8.2292 | 130700000 | 0         | 32534000  | 0         | 98165000 | 0        | 3765500  | 0        | 3138500 |         |         |
| P25440    | P25440    | Bromodomains-containing protein 2                             | BRD2     | sj P25440 | 6  | 6 | 6 | 0 | 6  | 4 | 4 | 0 | 6 | 4 | 0 | 5    | 3      | 10.9     | 88.36  | 0         | 9.1456    | 130680000 | 0         | 82067000 | 7989200  | 40630000 | 0        | 6114000 | 6270300 | 1889400 |
| P04424    | P04424    | Argininosuccinate lyase                                       | ASL      | sj P04424 | 6  | 6 | 6 | 0 | 3  | 0 | 6 | 0 | 3 | 0 | 6 | 0    | 15.9   | 51.657   | 0      | 13.706    | 130650000 | 0         | 15730000  | 0        | 1.15E+08 | 0        | 1482300  | 0       | 4630500 |         |
| O15427    | O15427    | Monocarboxylate transporter 4                                 | SLC16A3  | sj O15427 | 4  | 4 | 4 | 0 | 1  | 1 | 4 | 0 | 1 | 1 | 4 | 9.7  | 49.469 | 0        | 11.506 | 130300000 | 0         | 1440200   | 1683200   | 1.27E+08 | 0        | 371200   | 1189900  | 4910700 |         |         |
| Q94966    | Q94966    | Ubiquitin carboxyl-terminal hydrolase 19                      | USP19    | sj Q94966 | 8  | 8 | 8 | 0 | 8  | 0 | 8 | 0 | 8 | 0 | 8 | 10.5 | 145.65 | 0        | 24.632 | 129760000 | 0         | 23060000  | 0         | 1.07E+08 | 0        | 2620400  | 0        | 3818400 |         |         |
| P31751    | P31751    | RAC-beta serine/threonine-protein kinase                      | AKT2     | sj P31751 | 4  | 4 | 4 | 0 | 2  | 0 | 4 | 0 | 2 | 0 | 3 | 8.7  | 55.768 | 0        | 5.6482 | 129710000 | 0         | 8653600   | 0         | 1.21E+08 | 0        | 2626500  | 0        | 3092600 |         |         |
| Q9NRX2    | Q9NRX2    | 39S ribosomal protein L17, mitochondrial                      | MRPL17   | sj Q9NRX2 | 2  | 2 | 2 | 0 | 1  | 2 | 0 | 2 | 1 | 2 | 0 | 13.1 | 20.05  | 0        | 10.496 | 129600000 | 0         | 52932000  | 4112900   | 72010000 | 0        | 3888600  | 4181300  | 231300  |         |         |
| Q8TBX8    | Q8TBX8    | Phosphatidylinositol 5-phosphate 4-kinase type-2 PIP4K2C      | PIP4K2C  | sj Q8TBX8 | 4  | 4 | 4 | 1 | 4  | 0 | 4 | 1 | 4 | 0 | 4 | 12.8 | 47.299 | 0        | 15.378 | 128950000 | 2079000   | 30661000  | 0         | 96219000 | 4658100  | 1577200  | 0        | 2193400 |         |         |
| P51692:P4 | P51692:P4 | Signal transducer and activator of transcription 5T STAT5B:5T | STAT5B   | sj P51692 | 2  | 2 | 2 | 0 | 2  | 1 | 2 | 0 | 2 | 1 | 2 | 2    | 2.9    | 89.665   | 0      | 6.2641    | 128520000 | 0         | 75393000  | 2104400  | 51019000 | 0        | 5079500  | 1473600 | 1532400 |         |
| Q9BYC8    | Q9BYC8    | 39S ribosomal protein L32, mitochondrial                      | MRPL32   | sj Q9BYC8 | 1  | 1 | 1 | 0 | 1  | 1 | 1 | 0 | 1 | 1 | 0 | 12.2 | 21.405 | 0        | 42.635 | 128500000 | 0         | 41983000  | 4216300   | 82299000 | 0        | 3776800  | 2934500  | 3207300 |         |         |
| P55327    | P55327    | Tumor protein D52                                             | TPD52    | sj P55327 | 3  | 3 | 3 | 0 | 3  | 1 | 0 | 3 | 1 | 0 | 3 | 34.4 | 24.327 | 0        | 8.6818 | 128350000 | 0         | 1.25E+08  | 2954900   | 0        | 10559000 | 0        | 2480600  | 0       | 0       |         |
| Q9UNW1    | Q9UNW1    | Multiple inositol polyphosphate phosphatase 1                 | MINPP1   | sj Q9UNW1 | 2  | 2 | 2 | 0 | 2  | 0 | 2 | 0 | 2 | 0 | 2 | 5.1  | 55.051 | 0.000248 | 3.7266 | 128230000 | 0         | 71357000  | 0         | 56876000 | 0        | 6187100  | 0        | 2442000 |         |         |
| Q5VT52    | Q5VT52    | Regulation of nuclear pre-mRNA domain-containing protein 2    | RNPD2    | sj Q5VT52 | 7  | 7 | 7 | 0 | 6  | 0 | 4 | 0 | 6 | 0 | 4 | 10.3 | 156.02 | 0        | 14.024 | 128180000 | 0         | 61802000  | 0         | 66381000 | 0        | 4711700  | 0        | 3466100 |         |         |
| Q9UK56    | Q9UK56    | Protein kinase C and casein kinase substrate in rat PACSIN3   | PACSIN3  | sj Q9UK56 | 3  | 3 | 3 | 0 | 2  | 3 | 1 | 0 | 2 | 3 | 1 | 9    | 48.486 | 0        | 4.5484 | 128130000 | 0         | 40259000  | 3017400   | 84853000 | 0        | 3739000  | 529750   | 3631000 |         |         |
| P08581    | P08581    | Hepatocyte growth factor receptor                             | MET      | sj P08581 | 3  | 3 | 3 | 1 | 0  | 0 | 3 | 1 | 0 | 0 | 2 | 3.1  | 155.54 | 0        | 14.882 | 128100000 | 1155000   | 0         | 0         | 1.27E+08 | 4605100  | 0        | 0        | 1770400 |         |         |
| Q15398    | Q15398    | Disks large-associated protein 5                              | DLGAP5   | sj Q15398 | 6  | 6 | 6 | 0 | 3  | 0 | 5 | 0 | 3 | 0 | 5 | 11.2 | 95.114 | 0        | 14.674 | 128080000 | 0         | 30963000  | 0         | 97116000 | 0        | 3358900  | 0        | 3364400 |         |         |
| Q9H446    | Q9H446    | RWD domain-containing protein 1                               | RWD1     | sj Q9H446 | 2  | 2 | 2 | 0 | 1  | 0 | 1 | 0 | 1 | 0 | 1 | 10.7 | 27.939 | 0        | 8.5128 | 127980000 | 0         | 4058400   | 0         | 1.24E+08 | 0        | 0        | 0        | 5096300 |         |         |
| P04920    | P04920    | Anion exchange protein 2                                      | SLC4A2   | sj P04920 | 4  | 4 | 4 | 0 | 1  | 4 | 0 | 1 | 4 | 0 | 1 | 4    | 5.6    | 137.01   | 0      | 11.066    | 127900000 | 0         | 2544400   | 1.25E+08 | 0        | 2597100  | 0        | 4267800 |         |         |
| Q9N4V9    | Q9N4V9    | Heterogeneous nuclear ribonucleoprotein L-like                | HNRNPLL  | sj Q9N4V9 | 4  | 4 | 4 | 0 | 4  | 3 | 3 | 0 | 4 | 3 | 3 | 10.1 | 60.982 | 0        | 10.814 | 127870000 | 0         | 80055000  | 3910800   | 43907000 | 0        | 4683100  | 2377300  | 3900600 |         |         |
| Q147X3    | Q147X3    | N-alpha-acetyltransferase 30                                  | NAAD30   | sj Q147X3 | 4  | 4 | 4 | 0 | 4  | 1 | 4 | 0 | 4 | 1 | 4 | 19.1 | 39.319 | 0        | 19.252 | 127810000 | 0         | 26906000  | 1025100   | 99882000 | 0        | 1856900  | 2503700  | 2780600 |         |         |
| P40938    | P40938    | Replication factor C subunit 3                                | RFC3     | sj P40938 | 6  | 6 | 6 | 0 | 5  | 3 | 3 | 0 | 5 | 3 | 3 | 21.3 | 40.556 | 0        | 15.049 | 127420000 | 0         | 53696000  | 11893000  | 51827000 | 0        | 5056800  | 6320000  | 3269100 |         |         |
| P42858    | P42858    | Huntingtin                                                    | HTT      | sj P42858 | 9  | 9 | 9 | 0 | 9  | 0 | 5 | 0 | 9 | 0 | 5 | 3.9  | 347.6  | 0        | 18.538 | 127370000 | 0         | 47797000  | 0         | 49975000 | 0        | 5622400  | 0        | 3255300 |         |         |
| Q9UHR5    | Q9UHR5    | SAP30-binding protein                                         | SAP30BP  | sj Q9UHR5 | 3  | 3 | 3 | 0 | 3  | 2 | 3 | 0 | 3 | 2 | 3 | 12.3 | 33.87  | 0        | 8.9963 | 127220000 | 0         | 42793000  | 4004500   | 80420000 | 0        | 3533300  |          |         |         |         |

|        |           |                                                        |           |           |   |   |   |   |   |   |   |   |   |   |   |   |   |   |      |        |        |          |           |           |           |          |          |          |          |          |          |          |         |         |
|--------|-----------|--------------------------------------------------------|-----------|-----------|---|---|---|---|---|---|---|---|---|---|---|---|---|---|------|--------|--------|----------|-----------|-----------|-----------|----------|----------|----------|----------|----------|----------|----------|---------|---------|
| Q8YV8  | Q8YV8     | Centrosomal protein of 41 kDa                          | CEP41     | sp Q8YV8  | 3 | 3 | 3 | 0 | 1 | 0 | 3 | 0 | 1 | 0 | 3 | 0 | 1 | 0 | 3    | 8.6    | 41.368 | 0        | 5.733     | 121420000 | 0         | 21179000 | 0        | 1e+08    | 0        | 2285100  | 0        | 2142600  |         |         |
| P40692 | P40692    | DNA mismatch repair protein Mlh1                       | MLH1      | sp P40692 | 4 | 4 | 4 | 0 | 0 | 0 | 4 | 0 | 0 | 0 | 4 | 0 | 0 | 0 | 4    | 9.3    | 84.6   | 0        | 24.492    | 121290000 | 0         | 0        | 0        | 1.21e+08 | 0        | 0        | 0        | 4788600  |         |         |
| O95721 | O95721    | Synaptosomal-associated protein 29                     | SNAP29    | sp O95721 | 5 | 5 | 5 | 0 | 5 | 1 | 4 | 0 | 5 | 1 | 4 | 0 | 5 | 1 | 4    | 28.7   | 28.97  | 0        | 19.844    | 121260000 | 0         | 37624000 | 944900   | 82686000 | 0        | 2295700  | 2309800  | 27461000 | 0       | 2966000 |
| Q8WVK2 | Q8WVK2    | U4/U6.U5 small nuclear ribonucleoprotein 27 kDa SNRP27 | snRNP27   | sp Q8WVK2 | 3 | 3 | 3 | 1 | 3 | 2 | 3 | 1 | 3 | 2 | 3 | 1 | 3 | 2 | 3    | 29     | 18.86  | 0        | 9.0826    | 121220000 | 4734200   | 57026000 | 5029100  | 54431000 | 6499300  | 3609700  | 3809700  | 1460400  | 0       |         |
| Q13322 | Q13322    | Growth factor receptor-bound protein 10                | GRB10     | sp Q13322 | 5 | 5 | 5 | 0 | 1 | 2 | 5 | 0 | 1 | 2 | 5 | 0 | 1 | 2 | 5    | 9.8    | 67.231 | 0        | 9.7409    | 121080000 | 0         | 26537000 | 10657000 | 1.06e+08 | 0        | 0        | 0        | 2206100  | 9942000 |         |
| Q9BZE9 | Q9BZE9    | Tether containing UBX domain for GLUT4                 | ASPSCR1   | sp Q9BZE9 | 5 | 5 | 5 | 0 | 5 | 0 | 2 | 0 | 5 | 0 | 2 | 0 | 5 | 0 | 2    | 18.8   | 60.182 | 0        | 6.8614    | 120840000 | 0         | 79813000 | 0        | 41024000 | 0        | 5329200  | 0        | 3393400  |         |         |
| Q9BUK6 | Q9BUK6    | Protein misato homolog 1                               | MSTO1     | sp Q9BUK6 | 6 | 6 | 6 | 5 | 2 | 4 | 0 | 5 | 2 | 4 | 0 | 5 | 2 | 4 | 13.9 | 61.835 | 0      | 21.567   | 120820000 | 0         | 40900000  | 2826700  | 77095000 | 0        | 2962200  | 1759600  | 3949700  | 0        |         |         |
| P22830 | P22830    | Ferrochelatase, mitochondrial                          | FECH      | sp P22830 | 5 | 5 | 5 | 0 | 5 | 2 | 0 | 5 | 2 | 0 | 5 | 2 | 0 | 5 | 2    | 16.1   | 47.862 | 0        | 13.68     | 120800000 | 0         | 1.07e+08 | 2498400  | 11294000 | 0        | 8707000  | 1735700  | 1133400  | 0       |         |
| Q13740 | Q13740    | Cro166 antigen                                         | ALCAM     | sp Q13740 | 2 | 2 | 2 | 0 | 0 | 0 | 2 | 0 | 0 | 0 | 2 | 0 | 0 | 2 | 5    | 65.102 | 0      | 13.933   | 120740000 | 0         | 0         | 0        | 1.21e+08 | 0        | 0        | 0        | 4965700  | 0        |         |         |
| Q8WZ42 | Q8WZ42    | Titin                                                  | TTN       | sp Q8WZ42 | 3 | 3 | 3 | 0 | 1 | 1 | 3 | 0 | 1 | 1 | 3 | 0 | 1 | 1 | 3    | 0.1    | 381.6  | 0.006003 | 1.762     | 12070000  | 0         | 24664000 | 6816800  | 85217000 | 0        | 2599600  | 3115600  | 4708900  | 1156600 |         |
| Q8IUR7 | Q8IUR7    | Armadillo-like containing protein 8                    | ARMC8     | sp Q8IUR7 | 4 | 4 | 4 | 1 | 4 | 1 | 4 | 1 | 4 | 1 | 4 | 1 | 4 | 1 | 4    | 8      | 75.509 | 0        | 13.641    | 120390000 | 1966100   | 50026000 | 1109700  | 69059000 | 0        | 4575200  | 0        | 2722300  | 0       |         |
| O9GZN8 | O9GZN8    | UPF0687 protein C20orf27                               | C20orf27  | sp O9GZN8 | 1 | 1 | 1 | 0 | 1 | 0 | 1 | 0 | 1 | 0 | 1 | 0 | 1 | 0 | 1    | 8      | 19.291 | 0        | 5.1826    | 120370000 | 0         | 60648000 | 0        | 59721000 | 0        | 5346000  | 0        | 2456600  | 0       |         |
| Q8TD16 | Q8TD16    | Protein bicaudal D homolog 2                           | BICD2     | sp Q8TD16 | 6 | 6 | 6 | 0 | 3 | 0 | 6 | 0 | 3 | 0 | 6 | 0 | 3 | 0 | 6    | 9      | 93.532 | 0        | 21.776    | 120090000 | 0         | 15522000 | 0        | 1.05e+08 | 0        | 2587300  | 0        | 3081200  | 0       |         |
| O75496 | O75496    | Geminin                                                | GMNN      | sp O75496 | 3 | 3 | 3 | 0 | 3 | 0 | 1 | 0 | 3 | 0 | 1 | 0 | 3 | 0 | 1    | 23.4   | 23.565 | 0        | 4.0702    | 120060000 | 0         | 1.16e+08 | 0        | 4126000  | 0        | 8083500  | 0        | 2305800  | 0       |         |
| P61916 | P61916    | Epididymal secretory protein E1                        | NPC2      | sp P61916 | 2 | 2 | 2 | 0 | 1 | 0 | 1 | 0 | 2 | 0 | 1 | 0 | 2 | 0 | 1    | 2      | 17.2   | 16.57    | 0         | 6.9906    | 119960000 | 0        | 69179000 | 0        | 1.13e+08 | 0        | 1101300  | 0        | 4157500 | 0       |
| Q9H0H5 | Q9H0H5    | Rac GTPase-activating protein 1                        | RACGAP1   | sp Q9H0H5 | 6 | 6 | 6 | 0 | 5 | 4 | 6 | 0 | 5 | 4 | 6 | 0 | 5 | 4 | 6    | 14.4   | 71.026 | 0        | 11.055    | 119890000 | 0         | 28573000 | 11748000 | 79565000 | 0        | 2272100  | 8747400  | 2665900  | 0       |         |
| Q9Y314 | Q9Y314    | Nitric oxide synthase-interacting protein              | NOSIP     | sp Q9Y314 | 4 | 4 | 4 | 4 | 1 | 4 | 4 | 1 | 4 | 4 | 1 | 4 | 4 | 1 | 4    | 20.9   | 33.172 | 0        | 6.611     | 119660000 | 0         | 47889000 | 2767800  | 69003000 | 0        | 4514000  | 0        | 2545200  | 0       |         |
| O92599 | O92599    | Septin-8                                               | Sep-08    | sp O92599 | 6 | 6 | 6 | 4 | 1 | 5 | 2 | 6 | 1 | 3 | 1 | 4 | 1 | 3 | 1    | 14.3   | 55.756 | 0        | 11.525    | 119650000 | 98169     | 37444000 | 822090   | 81285000 | 691940   | 3983500  | 951750   | 16669000 | 0       |         |
| Q96CP2 | Q96CP2    | FLYWCH family member 2                                 | FLYWCH2   | sp Q96CP2 | 5 | 5 | 5 | 1 | 5 | 0 | 5 | 1 | 5 | 0 | 5 | 1 | 5 | 0 | 5    | 45.7   | 14.563 | 0        | 15.518    | 119520000 | 4853200   | 93194000 | 0        | 25842000 | 434960   | 8633300  | 0        | 694830   | 0       |         |
| Q92562 | Q92562    | Polypoehphoinositide phosphatase                       | FIG4      | sp Q92562 | 4 | 4 | 4 | 1 | 1 | 1 | 3 | 1 | 1 | 1 | 3 | 1 | 1 | 3 | 1    | 6.2    | 103.63 | 0        | 6.8773    | 119200000 | 0         | 52303000 | 7439700  | 59455000 | 0        | 5534100  | 4163300  | 2357600  | 0       |         |
| Q9Y6D9 | Q9Y6D9    | Mitotic spindle assembly checkpoint protein MAD MAD1L1 | sp Q9Y6D9 | 6         | 6 | 6 | 0 | 6 | 2 | 3 | 0 | 6 | 2 | 3 | 0 | 6 | 2 | 3 | 11.3 | 83.066 | 0      | 20.122   | 119180000 | 0         | 70833000  | 1276600  | 47517000 | 0        | 4852600  | 1720200  | 2443000  | 0        |         |         |
| E9PRG8 | E9PRG8    | Uncharacterized protein C11orf98                       | C11orf98  | sp E9PRG8 | 2 | 2 | 2 | 0 | 1 | 2 | 1 | 2 | 1 | 2 | 1 | 2 | 1 | 2 | 1    | 21.1   | 14.234 | 0        | 4.1874    | 119180000 | 0         | 34026000 | 1793900  | 67116000 | 0        | 2993900  | 12055000 | 2760200  | 0       |         |
| Q15650 | Q15650    | Activating signal cointegrator 1                       | TRIP4     | sp Q15650 | 5 | 5 | 5 | 0 | 5 | 3 | 5 | 0 | 5 | 3 | 5 | 0 | 5 | 3 | 5    | 11.2   | 66.145 | 0        | 7.7544    | 119060000 | 0         | 45283000 | 5825400  | 67948000 | 0        | 2828100  | 5340300  | 2136200  | 0       |         |
| Q0VGL1 | Q0VGL1    | Regulator complex protein LAMTOR4;Regulator c          | LAMTOR4   | sp Q0VGL1 | 1 | 1 | 1 | 1 | 1 | 0 | 1 | 1 | 0 | 1 | 1 | 0 | 1 | 1 | 0    | 10.1   | 10.741 | 0.004331 | 1.8973    | 118980000 | 3567600   | 34291000 | 81123000 | 0        | 2233500  | 2055800  | 56815000 | 0        | 0       |         |
| Q8TD22 | Q8TD22    | Protein-methionine sulfoxide oxidase MICAL1            | MICAL1    | sp Q8TD22 | 5 | 5 | 5 | 0 | 0 | 0 | 5 | 0 | 0 | 0 | 5 | 0 | 0 | 5 | 8.4  | 117.87 | 0      | 15.689   | 118880000 | 0         | 0         | 0        | 1.19e+08 | 0        | 0        | 0        | 4888900  | 0        |         |         |
| P48634 | P48634    | Protein PRRC2A                                         | PRRC2A    | sp P48634 | 5 | 4 | 4 | 0 | 3 | 5 | 4 | 0 | 3 | 5 | 4 | 0 | 3 | 5 | 4    | 7      | 228.86 | 0        | 7.3785    | 118760000 | 0         | 35546000 | 16411000 | 66806000 | 0        | 7021500  | 7009700  | 2877900  | 0       |         |
| Q8WTV3 | Q8WTV3    | Conserved oligomeric Golgi complex subunit 1           | COG1      | sp Q8WTV3 | 5 | 5 | 5 | 0 | 3 | 0 | 5 | 0 | 3 | 0 | 5 | 0 | 3 | 0 | 5    | 7.7    | 108.98 | 0        | 13.323    | 118680000 | 0         | 25374000 | 0        | 6301000  | 0        | 2969500  | 0        | 3104300  | 0       |         |
| P78318 | AD P78318 | immunoglobulin-binding protein 1                       | IGBP1     | sp P78318 | 3 | 3 | 3 | 0 | 2 | 0 | 3 | 0 | 2 | 0 | 3 | 0 | 2 | 0 | 3    | 14.5   | 39.221 | 0        | 18.071    | 118680000 | 0         | 25960000 | 0        | 92722000 | 0        | 3271300  | 0        | 2830300  | 0       |         |
| Q16878 | Q16878    | Cysteine dioxygenase type 1                            | CDO1      | sp Q16878 | 1 | 1 | 1 | 0 | 1 | 1 | 1 | 0 | 1 | 1 | 1 | 0 | 1 | 1 | 1    | 3.5    | 22.972 | 0.003485 | 1.9798    | 118520000 | 0         | 41501000 | 866830   | 16149000 | 0        | 3658200  | 582500   | 3131700  | 0       |         |
| Q9Y4K4 | Q9Y4K4    | Mitogen-activated protein kinase kinase kinase kina    | MAP4K5    | sp Q9Y4K4 | 7 | 7 | 7 | 0 | 7 | 0 | 7 | 0 | 7 | 0 | 7 | 0 | 7 | 0 | 7    | 13.9   | 95.023 | 0        | 18.211    | 118470000 | 0         | 10904000 | 0        | 1.08e+08 | 0        | 1524400  | 0        | 3860400  | 0       |         |
| Q86UJ8 | Q86UJ8    | 5-nucleotide domain-containing protein 3               | NTSDC3    | sp Q86UJ8 | 3 | 3 | 3 | 0 | 2 | 0 | 3 | 0 | 2 | 0 | 3 | 0 | 2 | 0 | 3    | 14.3   | 63.419 | 0        | 11.614    | 118460000 | 0         | 50329000 | 0        | 68127000 | 0        | 4286000  | 0        | 2948700  | 0       |         |
| Q9P2N5 | Q9P2N5    | RNA-binding protein 27                                 | RBM27     | sp Q9P2N5 | 7 | 6 | 6 | 1 | 7 | 5 | 4 | 0 | 6 | 4 | 3 | 6 | 4 | 3 | 8.8  | 118.72 | 0      | 10.287   | 118370000 | 0         | 55642000  | 11407000 | 51322000 | 0        | 3589800  | 8059500  | 3031700  | 0        |         |         |
| O43660 | O43660    | Pleiotropic regulator 1                                | PLRG1     | sp O43660 | 4 | 4 | 4 | 0 | 4 | 0 | 4 | 0 | 2 | 0 | 4 | 0 | 2 | 0 | 4    | 17.7   | 57.193 | 0        | 18.998    | 118260000 | 0         | 25093000 | 0        | 13614000 | 0        | 2146600  | 0        | 3628700  | 0       |         |
| Q92636 | Q92636    | Protein FAN                                            | NSMAF     | sp Q92636 | 2 | 2 | 2 | 0 | 0 | 0 | 2 | 0 | 0 | 0 | 2 | 0 | 0 | 2 | 5    | 104.37 | 0      | 8.8291   | 117950000 | 0         | 0         | 0        | 1.18e+08 | 0        | 0        | 0        | 4850800  | 0        |         |         |
| O00139 | O00139    | Kinesin-like protein KIF2A                             | KIF2A     | sp O00139 | 5 | 4 | 4 | 0 | 4 | 2 | 5 | 0 | 4 | 0 | 3 | 1 | 4 | 0 | 3    | 11.9   | 79.954 | 0        | 11.638    | 117730000 | 0         | 41957000 | 5808400  | 69962000 | 0        | 3942100  | 4714800  | 1827000  | 0       |         |
| Q9UM54 | Q9UM54    | Unconventional myosin-VI                               | MYO6      | sp Q9UM54 | 8 | 8 | 8 | 3 | 8 | 0 | 2 | 3 | 8 | 0 | 2 | 3 | 8 | 0 | 2    | 8.7    | 149.69 | 0        | 17.594    | 117670000 | 9203600   | 94847000 | 0        | 13624000 | 10688000 | 5810100  | 0        | 1626400  | 0       |         |
| Q5VY58 | Q5VY58    | Terminal uridylyltransferase 7                         | ZCCHC6    | sp Q5VY58 | 6 | 6 | 6 | 0 | 5 | 4 | 0 | 5 | 4 | 0 | 5 | 4 | 0 | 5 | 4    | 6.4    | 171.23 | 0        | 11.007    | 117630000 | 0         | 18091000 | 99542000 | 0        | 0        | 10131000 | 6120500  | 0        | 0       |         |
| O75794 | O75794    | Cell division cycle protein 123 homolog                | CDC123    | sp O75794 | 3 | 3 | 3 | 0 | 3 | 0 | 3 | 0 | 3 | 0 | 3 | 0 | 3 | 0 | 3    | 11     | 39.134 | 0        | 7.6487    | 117610000 | 0         | 13201000 | 0        | 1.04e+08 | 0        | 1087100  | 0        | 4370500  | 0       |         |
| O55Y16 | O55Y16    | Polynucleotide 5-hydroxyl-kinase NOL9                  | NOL9      | sp O55Y16 | 5 | 5 | 5 | 0 | 5 | 1 | 0 | 5 | 1 | 0 | 5 | 1 | 0 | 5 | 1    | 12.4   | 79.322 | 0        | 25.541    | 117450000 | 0         | 1.14e+08 | 3602600  | 0        | 9336200  | 3120700  | 0        | 0        |         |         |
| Q99470 | Q99470    | Stromal cell-derived factor 2                          | SDF2      | sp Q99470 | 3 | 3 | 3 | 0 | 2 | 1 | 3 | 0 | 2 | 1 | 3 | 0 | 2 | 1 | 3    | 25.1   | 23.026 | 0        | 10.157    | 117310000 | 0         | 19306000 | 2060100  | 1.02e+08 | 0        | 1342300  | 1667200  | 3727400  | 0       |         |
| Q9UNB6 | Q9UNB6    | Tumor necrosis factor receptor superfamily mem         | TNFRSF10I | sp Q9UNB6 | 1 | 1 | 1 | 0 | 0 | 0 | 1 | 0 | 0 | 0 | 1 | 0 | 0 | 0 | 1    | 7.5    | 41.823 | 0        | 22.246    | 117170000 | 0         | 0        | 0        | 1.17e+08 | 0        | 0        | 0        | 4818700  | 0       |         |
| P09488 | OC P09488 | Glutathione S-transferase Mu 1;Glutathione S-tr        | GSTM1;G5S | sp P09488 | 5 | 2 | 1 | 1 | 3 | 2 | 5 | 0 | 1 | 2 | 0 | 0 | 1 | 2 | 0    | 1      | 29.8   | 25.712   | 0         | 11.532    | 117030000 | 0        | 3848600  | 1138000  | 0        | 2836200  | 4406400  | 0        | 0       |         |
| Q43294 | Q43294    | Transforming growth factor beta-1-induced trans        | TGFB1     | sp Q43294 | 2 | 2 | 2 | 0 | 1 | 2 | 2 | 0 | 1 | 2 | 2 | 0 | 1 | 2 | 2    | 6.3    | 49.814 | 0        | 6.2067    | 116980000 | 0         | 23071000 | 9531400  | 84286000 | 0        | 2907400  | 3366800  | 3390000  | 0       |         |
| O43678 | O43678    | NADH dehydrogenase [ubiquinone] 1 alpha-subu</         |           |           |   |   |   |   |   |   |   |   |   |   |   |   |   |   |      |        |        |          |           |           |           |          |          |          |          |          |          |          |         |         |

|          |          |                                                           |            |             |    |   |   |    |    |    |    |   |   |   |   |   |   |     |        |        |          |           |           |           |           |          |          |          |         |         |          |          |         |
|----------|----------|-----------------------------------------------------------|------------|-------------|----|---|---|----|----|----|----|---|---|---|---|---|---|-----|--------|--------|----------|-----------|-----------|-----------|-----------|----------|----------|----------|---------|---------|----------|----------|---------|
| P01889   | P01889   | HLA class I histocompatibility antigen, B-7 alpha chain   | HLA-B      | sp P01889   | 3  | 2 | 0 | 2  | 1  | 2  | 0  | 1 | 1 | 2 | 0 | 1 | 1 | 2   | 13.3   | 40.46  | 0        | 13.689    | 110970000 | 0         | 11254000  | 1802300  | 97917000 | 0        | 1665900 | 1471900 | 3092300  |          |         |
| Q9NW82   | Q9NW82   | WD repeat-containing protein 70                           | WDR70      | sp Q9NW82   | 8  | 8 | 8 | 0  | 7  | 1  | 4  | 0 | 7 | 1 | 4 | 0 | 7 | 1   | 4      | 16.8   | 73.2     | 0         | 17.258    | 110540000 | 0         | 90121000 | 492120   | 19925000 | 0       | 8016600 | 0        | 746380   |         |
| Q15392   | Q15392   | Delta(24)-sterol reductase                                | DHCR24     | sp Q15392   | 4  | 4 | 0 | 4  | 0  | 4  | 0  | 4 | 0 | 4 | 1 | 4 | 0 | 4   | 6.6    | 60.101 | 0        | 7.4824    | 1122700   | 82226000  | 0         | 1888800  | 1367400  | 25316000 | 0       | 1888800 | 1367400  | 25316000 |         |
| Q9UKL0   | Q9UKL0   | REST corepressor 1                                        | RCOR1      | sp Q9UKL0   | 5  | 5 | 4 | 0  | 5  | 1  | 2  | 0 | 5 | 1 | 2 | 0 | 5 | 1   | 2      | 15.3   | 53.327   | 0         | 11.565    | 109680000 | 0         | 63868000 | 1850400  | 43963000 | 0       | 3679000 | 2518300  | 2484100  |         |
| Q75955   | Q75955   | Fliotillin-1                                              | FLOT1      | sp Q75955   | 7  | 7 | 3 | 4  | 4  | 4  | 4  | 3 | 4 | 4 | 4 | 4 | 4 | 4   | 21.1   | 47.355 | 0        | 20.834    | 109560000 | 17651000  | 26539000  | 5826500  | 59543000 | 18203000 | 2814900 | 3559900 | 1776800  |          |         |
| Q96K37   | Q96K37   | Solute carrier family 35 member E1                        | SLC35E1    | sp Q96K37   | 2  | 2 | 2 | 1  | 1  | 1  | 2  | 1 | 1 | 1 | 2 | 1 | 1 | 2   | 12     | 44.772 | 0        | 24.4      | 109410000 | 2583600   | 20081000  | 5190000  | 81560000 | 26064000 | 1859300 | 4022200 | 2707800  |          |         |
| Q15334   | Q15334   | Lethal(2) giant larvae protein homolog 1                  | LG1L1      | sp Q15334   | 6  | 6 | 6 | 6  | 2  | 6  | 0  | 2 | 2 | 6 | 0 | 2 | 6 | 8.2 | 115.42 | 0      | 22.514   | 109390000 | 0         | 9852000   | 3506200   | 96034000 | 0        | 1343200  | 2033000 | 3797800 |          |          |         |
| Q9Y426   | Q9Y426   | C2 domain-containing protein 2                            | C2CD2      | sp Q9Y426   | 7  | 7 | 7 | 0  | 0  | 3  | 7  | 0 | 0 | 3 | 7 | 0 | 0 | 3   | 7      | 19.4   | 75.532   | 0         | 28.457    | 109030000 | 0         | 4807300  | 1.04E+08 | 0        | 0       | 4693900 | 2822700  |          |         |
| P61970   | P61970   | Nuclear transport factor 2                                | NUTF2      | sp P61970   | 2  | 2 | 2 | 0  | 1  | 1  | 2  | 0 | 1 | 1 | 2 | 0 | 1 | 2   | 26     | 14.478 | 0        | 15.893    | 108670000 | 0         | 21146000  | 1388600  | 86136000 | 0        | 0       | 0       | 3542400  |          |         |
| Q15020   | Q15020   | Spectrin beta chain, non-erythrocytic 2                   | SPTBN2     | sp Q15020   | 11 | 7 | 7 | 1  | 10 | 3  | 3  | 1 | 7 | 1 | 0 | 1 | 7 | 1   | 0      | 7.9    | 27.432   | 0         | 16.47     | 108620000 | 1155500   | 1.02E+08 | 5168800  | 0        | 1624900 | 8547900 | 0        |          |         |
| Q9H9E3   | Q9H9E3   | Conserved oligomeric Golgi complex subunit 4              | COG4       | sp Q9H9E3   | 5  | 5 | 5 | 0  | 4  | 4  | 4  | 0 | 4 | 4 | 4 | 0 | 4 | 4   | 8.4    | 89.082 | 0        | 19.084    | 108330000 | 0         | 30944000  | 10766000 | 66624000 | 0        | 2451400 | 7611500 | 2639500  |          |         |
| Q0637    | Q0637    | Tetraspanin-3                                             | TSPAN3     | sp Q0637    | 2  | 2 | 2 | 0  | 1  | 0  | 2  | 0 | 1 | 0 | 2 | 0 | 1 | 0   | 2      | 8.3    | 28.017   | 0.001139  | 2.535     | 108100000 | 0         | 16784000 | 0        | 91312000 | 0       | 3043600 | 0        | 2191200  |         |
| Q6WK24   | Q6WK24   | Rab11 family-interacting protein 1                        | RAB11F1P1  | sp Q6WK24   | 3  | 3 | 3 | 0  | 3  | 1  | 2  | 0 | 3 | 1 | 2 | 0 | 3 | 1   | 2      | 4.1    | 137.17   | 0         | 7.015     | 108000000 | 0         | 59767000 | 12661000 | 35569000 | 0       | 3407900 | 10453000 | 1378500  |         |
| Q8N108   | Q8N108   | Mesoderm induction early response protein 1               | MIER1      | sp Q8N108   | 2  | 2 | 2 | 0  | 2  | 0  | 2  | 0 | 2 | 0 | 2 | 0 | 2 | 0   | 6.2    | 57.983 | 0        | 5.386     | 107990000 | 0         | 53391000  | 0        | 54064000 | 0        | 4706300 | 0       | 0        |          |         |
| Q9BQ70   | Q9BQ70   | Transcription factor 25                                   | TCF25      | sp Q9BQ70   | 4  | 4 | 4 | 0  | 2  | 1  | 4  | 0 | 2 | 1 | 4 | 0 | 2 | 1   | 4      | 10.7   | 76.666   | 0         | 27.775    | 107690000 | 0         | 18844000 | 3523000  | 85232000 | 0       | 2623200 | 2411400  | 2502900  |         |
| Q9NRZ9   | Q9NRZ9   | Lymphoid-specific helix                                   | HELLS      | sp Q9NRZ9   | 7  | 7 | 7 | 0  | 4  | 6  | 0  | 5 | 4 | 6 | 0 | 5 | 4 | 6   | 9.8    | 97.073 | 0        | 15.106    | 107640000 | 0         | 37093000  | 5823900  | 64720000 | 0        | 2706100 | 4226800 | 2912100  |          |         |
| Q75127   | Q75127   | Penitricopeptide repeat-containing protein 1              | PTC01      | sp Q75127   | 2  | 2 | 2 | 0  | 2  | 0  | 2  | 0 | 2 | 0 | 2 | 0 | 2 | 0   | 2      | 3      | 78.855   | 0         | 6.494     | 107280000 | 0         | 36257000 | 0        | 71018000 | 0       | 3128600 | 0        | 2988100  |         |
| Q9UL45   | Q9UL45   | Biogenesis of lysosome-related organelles complex BLOC1C5 | BLOC1C5    | sp Q9UL45   | 1  | 1 | 1 | 0  | 0  | 1  | 0  | 0 | 0 | 1 | 0 | 0 | 0 | 1   | 11     | 19.743 | 0.00135  | 2.3856    | 107090000 | 0         | 0         | 0        | 1.07E+08 | 0        | 0       | 0       | 4404200  |          |         |
| Q9Y218   | Q9Y218   | WD repeat-containing protein 37                           | WDR37      | sp Q9Y218   | 3  | 3 | 3 | 0  | 2  | 3  | 2  | 0 | 2 | 3 | 2 | 0 | 2 | 3   | 2      | 8.1    | 54.665   | 0         | 9.373     | 106850000 | 0         | 37779000 | 23760000 | 45316000 | 0       | 3938700 | 14711000 | 2511100  |         |
| Q12840   | Q12840   | Kinesin heavy chain isoform 5A                            | KIF5A      | sp Q12840   | 10 | 3 | 3 | 1  | 7  | 6  | 10 | 1 | 0 | 0 | 3 | 1 | 0 | 0   | 3      | 12.3   | 117.38   | 0         | 9.1044    | 106390000 | 58155000  | 0        | 48231000 | 58466000 | 0       | 0       | 0        | 1672300  |         |
| Q5JPH6   | Q5JPH6   | Probable glutamate-tRNA ligase, mitochondrial             | EARS2      | sp Q5JPH6   | 4  | 4 | 4 | 0  | 3  | 0  | 2  | 0 | 3 | 0 | 2 | 0 | 3 | 0   | 2      | 9      | 58.688   | 0         | 13.949    | 106330000 | 0         | 95746000 | 0        | 10586000 | 0       | 7034800 | 0        | 1840400  |         |
| Q8N1G2   | Q8N1G2   | Cap-specific mRNA (nucleoside-2-O)-methyltransferase      | CMTR1      | sp Q8N1G2   | 6  | 6 | 6 | 0  | 6  | 0  | 5  | 0 | 6 | 0 | 5 | 0 | 6 | 0   | 5      | 6.9    | 95.32    | 0         | 13.309    | 106270000 | 0         | 63696000 | 0        | 42574000 | 0       | 5827900 | 0        | 1537700  |         |
| Q9Y212   | Q9Y212   | Band 4.1-like protein 3; Band 4.1-like protein 3, N       | EPB41L3    | sp Q9Y212   | 10 | 8 | 8 | 0  | 10 | 1  | 0  | 0 | 8 | 0 | 8 | 0 | 8 | 0   | 8      | 0      | 17.8     | 120.68    | 0         | 16.669    | 106110000 | 0        | 1.06E+08 | 0        | 0       | 0       | 9333300  | 0        | 0       |
| Q92844   | Q92844   | TRAF family member-associated NF-kappa-B activator        | NFAM1      | sp Q92844   | 9  | 9 | 9 | 2  | 1  | 8  | 2  | 2 | 1 | 8 | 2 | 2 | 1 | 8   | 2      | 30.4   | 47.815   | 0         | 21.633    | 105820000 | 5180600   | 1668700  | 85775000 | 13194000 | 825430  | 139090  | 62190000 | 356350   |         |
| Q9H8K9   | Q9H8K9   | Arsenite methyltransferase                                | AS3MT      | sp Q9H8K9   | 4  | 4 | 4 | 0  | 4  | 0  | 4  | 0 | 4 | 0 | 3 | 0 | 4 | 0   | 3      | 11.7   | 41.747   | 0         | 11.159    | 105570000 | 0         | 57472000 | 0        | 48097000 | 0       | 4610200 | 0        | 2433900  |         |
| P03891   | P03891   | NAADH-ubiquinone oxidoreductase chain 2                   | MT-ND2     | sp P03891   | 1  | 1 | 1 | 0  | 1  | 1  | 1  | 0 | 1 | 1 | 1 | 0 | 1 | 1   | 2.6    | 38.956 | 0.001565 | 2.2955    | 105490000 | 0         | 29494000  | 1336400  | 74747000 | 0        | 2591900 | 898030  | 3074000  |          |         |
| P82932   | P82932   | 28S ribosomal protein S6, mitochondrial                   | MRP56      | sp P82932   | 3  | 3 | 3 | 1  | 2  | 3  | 1  | 2 | 3 | 1 | 2 | 3 | 1 | 2   | 3      | 24     | 14.226   | 0         | 7.817     | 105400000 | 321600    | 51013000 | 7948600  | 46155000 | 1181500 | 5621100 | 2285300  | 2170000  |         |
| Q723E5   | Q723E5   | Lish domain-containing protein ARMC9                      | ARMC9      | sp Q723E5   | 5  | 5 | 5 | 0  | 1  | 0  | 5  | 0 | 1 | 0 | 5 | 0 | 1 | 0   | 5      | 7.1    | 91.818   | 0         | 13.008    | 105400000 | 0         | 3585400  | 0        | 1.01E+08 | 0       | 316050  | 0        | 4172200  |         |
| P56945   | P56945   | Breast cancer anti-estrogen resistance protein 1          | BCAR1      | sp P56945   | 5  | 5 | 5 | 0  | 0  | 1  | 5  | 0 | 0 | 1 | 5 | 0 | 0 | 1   | 5      | 12     | 93.371   | 0         | 14.575    | 104870000 | 0         | 0        | 0        | 4667200  | 1E+08   | 0       | 0        | 3136300  | 4120700 |
| P11388   | P11388   | DNA topoisomerase 2-alpha                                 | TOP2A      | sp P11388   | 6  | 6 | 6 | 2  | 1  | 5  | 3  | 3 | 1 | 5 | 3 | 3 | 2 | 2   | 1      | 4.9    | 174.38   | 0         | 14.565    | 104730000 | 346330    | 43265000 | 10379000 | 50739000 | 0       | 2909700 | 8549200  | 1416400  |         |
| P13591   | P13591   | Neural cell adhesion molecule 1                           | NCAM1      | sp P13591   | 4  | 4 | 4 | 0  | 4  | 0  | 3  | 0 | 4 | 0 | 3 | 0 | 4 | 0   | 3      | 8.2    | 94.573   | 0         | 28.018    | 104670000 | 0         | 63652000 | 0        | 40118000 | 0       | 5445900 | 0        | 1851900  | 0       |
| Q9Y2U8   | Q9Y2U8   | Inner nuclear membrane protein Man1                       | LEM03      | sp Q9Y2U8   | 5  | 5 | 5 | 0  | 5  | 1  | 2  | 0 | 5 | 1 | 2 | 0 | 5 | 1   | 2      | 12.3   | 99.996   | 0         | 17.116    | 104580000 | 0         | 60247000 | 2424900  | 40293000 | 0       | 4460300 | 1908300  | 2180400  |         |
| Q8NBN3   | Q8NBN3   | Transmembrane protein 87A                                 | TMEM87A    | sp Q8NBN3   | 1  | 1 | 1 | 0  | 1  | 0  | 1  | 0 | 1 | 0 | 1 | 0 | 1 | 0   | 1      | 3.8    | 63.429   | 0         | 10.425    | 104480000 | 0         | 17661000 | 0        | 8681800  | 0       | 1556800 | 0        | 3570500  |         |
| POCW20.P | POCW20.P | LIM and senescent cell antigen-like-containing domain     | LIMS3L1LIM | sp POCW20.P | 2  | 2 | 2 | 0  | 1  | 2  | 0  | 0 | 1 | 2 | 0 | 0 | 1 | 2   | 25.6   | 13.251 | 0        | 10.662    | 104330000 | 0         | 0         | 2286200  | 1.02E+08 | 0        | 0       | 1951800 | 2793100  |          |         |
| P78316   | P78316   | Nucleolar protein 14                                      | NOP14      | sp P78316   | 6  | 6 | 6 | 0  | 6  | 4  | 4  | 0 | 6 | 4 | 4 | 0 | 6 | 4   | 8.9    | 97.667 | 0        | 12.316    | 104310000 | 0         | 49217000  | 12878000 | 42214000 | 0        | 3423200 | 9344500 | 1960400  |          |         |
| Q9H7D0   | Q9H7D0   | Dedicator of cytokinesis protein 5                        | DOCK5      | sp Q9H7D0   | 4  | 4 | 4 | 0  | 0  | 1  | 4  | 0 | 0 | 1 | 4 | 0 | 0 | 1   | 4      | 3.5    | 215.31   | 0         | 9.0077    | 104290000 | 0         | 0        | 1266000  | 1.03E+08 | 0       | 0       | 2677700  | 2410100  |         |
| Q13885   | Q13885   | Tubulin beta-2 chain                                      | TUBB2A     | sp Q13885   | 23 | 1 | 1 | 11 | 23 | 20 | 23 | 0 | 1 | 1 | 1 | 1 | 1 | 1   | 61.8   | 49.906 | 0.002049 | 3.7546    | 104290000 | 0         | 56549000  | 2654100  | 45091000 | 0        | 4984800 | 1783500 | 1844000  |          |         |
| Q6UW63   | Q6UW63   | KDEL motif-containing protein 1                           | KDEL1C1    | sp Q6UW63   | 4  | 4 | 4 | 0  | 1  | 0  | 4  | 0 | 1 | 0 | 4 | 0 | 1 | 0   | 4      | 10.6   | 58.042   | 0         | 9.463     | 104270000 | 0         | 15019000 | 0        | 89248000 | 0       | 2053000 | 0        | 2944100  |         |
| Q95208   | Q95208   | Epsin-2                                                   | EPN2       | sp Q95208   | 6  | 6 | 6 | 0  | 6  | 0  | 6  | 0 | 6 | 0 | 6 | 0 | 6 | 0   | 6      | 9.4    | 68.481   | 0         | 14.933    | 104120000 | 0         | 12089000 | 0        | 92036000 | 0       | 1793600 | 0        | 8057000  |         |
| Q5VTB9   | Q5VTB9   | E3 ubiquitin-protein ligase RNF220                        | RNF220     | sp Q5VTB9   | 3  | 3 | 3 | 0  | 3  | 2  | 2  | 0 | 3 | 2 | 2 | 0 | 3 | 2   | 2      | 5.8    | 62.765   | 0         | 5.45      | 103990000 | 0         | 62132000 | 2219900  | 39635000 | 0       | 4027400 | 1992700  | 2578600  |         |
| Q9BUR5   | Q9BUR5   | Apollipoprotein B                                         | APOB       | sp Q9BUR5   | 2  | 2 | 2 | 0  | 2  | 0  | 2  | 0 | 2 | 0 | 2 | 0 | 2 | 0   | 2      | 11.1   | 22.284   | 0         | 5.874     | 103650000 | 0         | 48845000 | 0        | 48810000 | 0       | 4691200 | 0        | 2150700  |         |
| P16383   | P16383   | G-c-rich sequence DNA-binding factor 2                    | GCFC2      | sp P16383   | 3  | 3 | 3 | 0  | 3  | 0  | 3  | 0 | 3 | 0 | 3 | 0 | 3 | 0   | 3      | 4.5    | 89.384   | 0.001176  | 3.0558    | 103570000 | 0         | 46477000 | 0        | 57092000 | 0       | 4483300 | 0        | 1961500  |         |
| Q13445   | Q13445   | Transmembrane emp24 domain-containing protein 1           | TMEME1     | sp Q13445   | 4  | 4 | 4 | 1  | 4  | 0  | 3  | 1 | 4 | 0 | 3 | 1 | 4 | 0   | 3      | 20.7   | 25.206   | 0         | 7.462     | 103560000 | 236970    | 53034000 | 0        | 60288000 | 517190  | 4058500 | 0        | 2404200  |         |
| P51580   | P51580   | Thyoxine S-methyltransferase                              | TMPT       | sp P51580   | 6  | 4 | 4 | 0  | 4  | 0  | 4  | 0 | 4 | 0 | 4 | 0 | 4 | 0   | 4      | 17.1   | 28.18    | 0         | 12.375    | 103450000 | 0         | 41557000 | 0        | 1.03E+08 | 0       | 3743000 | 0        | 2461500  |         |
| Q9B5R8   | Q        |                                                           |            |             |    |   |   |    |    |    |    |   |   |   |   |   |   |     |        |        |          |           |           |           |           |          |          |          |         |         |          |          |         |

|           |        |                                                  |            |           |    |   |   |   |   |   |    |   |   |   |   |      |        |          |          |          |          |          |          |          |          |          |         |          |         |         |
|-----------|--------|--------------------------------------------------|------------|-----------|----|---|---|---|---|---|----|---|---|---|---|------|--------|----------|----------|----------|----------|----------|----------|----------|----------|----------|---------|----------|---------|---------|
| Q9Y3B2    | Q9Y3B2 | Exosome complex component CSL4                   | EXOSC1     | sp Q9Y3B2 | 3  | 3 | 3 | 0 | 3 | 3 | 3  | 0 | 3 | 3 | 3 | 18.5 | 21.452 | 0        | 5.5852   | 98952000 | 0        | 34388000 | 9137800  | 55426000 | 0        | 3055900  | 6131500 | 2263800  |         |         |
| P61803    | P61803 | Dolichyl-diphosphooligosaccharide--protein glyco | DAD1       | sp P61803 | 2  | 2 | 2 | 0 | 0 | 2 | 0  | 0 | 0 | 0 | 0 | 2    | 15.9   | 12.497   | 0.001564 | 2.2816   | 98915000 | 0        | 0        | 98915000 | 0        | 0        | 0       | 4067900  |         |         |
| P49790    | P49790 | Nuclear pore complex protein Nup153              | NUP153     | sp P49790 | 5  | 5 | 5 | 0 | 3 | 4 | 0  | 5 | 3 | 4 | 0 | 5    | 4.9    | 15.94    | 0        | 17.172   | 98715000 | 0        | 47977000 | 3931000  | 46807000 | 0        | 3568000 | 4134600  | 1093100 |         |
| Q7L5V1    | Q7L5V1 | Mitochondrial enolase superfamily member 1       | ENOSF1     | sp Q7L5V1 | 1  | 1 | 1 | 0 | 1 | 0 | 1  | 0 | 1 | 0 | 1 | 1    | 3.8    | 49.786   | 0        | 7.9043   | 98633000 | 0        | 27658000 | 0        | 70975000 | 0        | 2438000 | 0        | 2918900 |         |
| Q8TAF3    | Q8TAF3 | WD repeat-containing protein 48                  | WDR48      | sp Q8TAF3 | 4  | 4 | 4 | 0 | 4 | 1 | 3  | 0 | 4 | 1 | 3 | 0    | 10.5   | 76.21    | 0        | 6.3021   | 98615000 | 0        | 52771000 | 1417300  | 44426000 | 0        | 3967400 | 1547300  | 1916500 |         |
| Q95167    | Q95167 | NADH dehydrogenase [ubiquinone] 1 alpha subc     | NDUFA3     | sp Q95167 | 2  | 2 | 2 | 0 | 1 | 0 | 2  | 0 | 1 | 0 | 2 | 0    | 41.7   | 9.2787   | 0.001566 | 2.3048   | 98381000 | 0        | 27058000 | 0        | 71323000 | 0        | 2771500 | 0        | 2546900 |         |
| Q9Y2R0    | Q9Y2R0 | Cytochrome c oxidase assembly factor 3 homolog   | COA3       | sp Q9Y2R0 | 3  | 3 | 3 | 0 | 3 | 0 | 3  | 0 | 3 | 0 | 3 | 0    | 30.2   | 11.731   | 0        | 9.6127   | 98363000 | 0        | 57719000 | 0        | 40664000 | 0        | 4993800 | 0        | 1765600 |         |
| Q6UX04    | Q6UX04 | Peptidyl-prolyl cis-trans isomerase CWC27 homol  | CWC27      | sp Q6UX04 | 1  | 1 | 1 | 0 | 1 | 0 | 1  | 0 | 1 | 0 | 1 | 0    | 7.2    | 53.846   | 0        | 11.916   | 98295000 | 0        | 24473000 | 0        | 53548000 | 0        | 2182000 | 0        | 3024400 |         |
| Q86YV1    | Q86YV1 | Dolichyl-diphosphatase 1                         | DOLP1      | sp Q86YV1 | 3  | 3 | 3 | 0 | 3 | 0 | 3  | 0 | 3 | 0 | 3 | 0    | 2      | 15.5     | 27.03    | 0        | 11.275   | 98295000 | 0        | 49534000 | 0        | 53448000 | 0       | 4074000  | 0       | 2082000 |
| Q9BVA0    | Q9BVA0 | Katanin p80 WD40 repeat-containing subunit B1    | KATPB1     | sp Q9BVA0 | 5  | 5 | 5 | 0 | 5 | 0 | 5  | 0 | 5 | 0 | 5 | 0    | 14.5   | 72.333   | 0        | 9.7607   | 98145000 | 0        | 49755000 | 0        | 48380000 | 0        | 3878600 | 0        | 2497900 |         |
| Q969J7    | Q969J7 | Proteasome assembly chaperone 2                  | PSMG2      | sp Q969J7 | 3  | 3 | 3 | 0 | 3 | 0 | 3  | 0 | 3 | 0 | 3 | 0    | 10.6   | 29.396   | 0        | 7.1504   | 97794000 | 0        | 32345000 | 0        | 68649000 | 0        | 3551300 | 0        | 2845800 |         |
| Q9BTX1    | Q9BTX1 | Nucleoporin NDC1                                 | NDC1       | sp Q9BTX1 | 4  | 4 | 4 | 0 | 4 | 0 | 4  | 0 | 4 | 0 | 4 | 0    | 9.2    | 76.304   | 0        | 16.426   | 97763000 | 0        | 3839100  | 0        | 93924000 | 0        | 575200  | 0        | 3625900 |         |
| Q07864    | Q07864 | DNA polymerase epsilon catalytic subunit A       | POLE       | sp Q07864 | 4  | 4 | 4 | 0 | 3 | 0 | 3  | 0 | 3 | 0 | 3 | 0    | 2.9    | 261.51   | 0        | 9.8734   | 97614000 | 0        | 46387000 | 0        | 51227000 | 0        | 2301300 | 0        | 3894400 |         |
| Q9H788    | Q9H788 | SH2 domain-containing protein 4A                 | SH2D4A     | sp Q9H788 | 2  | 2 | 2 | 0 | 1 | 0 | 2  | 0 | 1 | 0 | 2 | 0    | 6.8    | 52.726   | 0.001172 | 2.9921   | 97596000 | 0        | 16400000 | 0        | 81556000 | 0        | 0       | 0        | 3354000 |         |
| P09496    | P09496 | Clathrin light chain A                           | CLTA       | sp P09496 | 2  | 2 | 2 | 0 | 1 | 2 | 2  | 0 | 2 | 2 | 0 | 2    | 6.9    | 27.076   | 0        | 4.5578   | 97553000 | 0        | 13894000 | 16786000 | 66873000 | 0        | 1857200 | 10516000 | 2882100 |         |
| Q96CV9    | Q96CV9 | Optineurin                                       | OPTN       | sp Q96CV9 | 3  | 3 | 3 | 0 | 1 | 0 | 3  | 0 | 1 | 0 | 3 | 0    | 6.4    | 65.921   | 0        | 4.2729   | 97525000 | 0        | 11292000 | 0        | 86233000 | 0        | 0       | 0        | 3546400 |         |
| Q03252    | Q03252 | Lamin-B2                                         | LMNB2      | sp Q03252 | 6  | 5 | 5 | 0 | 6 | 1 | 5  | 0 | 5 | 0 | 5 | 0    | 4      | 10.2     | 69.948   | 0        | 11.781   | 97463000 | 0        | 42539000 | 0        | 54923000 | 0       | 3789500  | 0       | 2219100 |
| Q75879    | Q75879 | GlutamyL-tRNA(Gln) amidotransferase subunit B    | GATB       | sp Q75879 | 4  | 4 | 4 | 0 | 4 | 0 | 3  | 0 | 4 | 0 | 3 | 0    | 4      | 15.3     | 61.863   | 0        | 30       | 97462000 | 0        | 28586000 | 0        | 68876000 | 0       | 2900800  | 0       | 2451600 |
| Q8TBS2    | Q8TBS2 | F-box only protein 30                            | FBXO30     | sp Q8TBS2 | 3  | 3 | 3 | 0 | 2 | 0 | 3  | 0 | 2 | 0 | 3 | 0    | 4.4    | 82.303   | 0        | 8.3992   | 97386000 | 0        | 7190500  | 0        | 90195000 | 0        | 1239300 | 0        | 2103900 |         |
| Q8IZ07;Q6 | Q8IZ07 | Ankyrin repeat domain-containing protein 13A     | ANKRD13A   | sp Q8IZ07 | 4  | 4 | 4 | 0 | 1 | 1 | 4  | 0 | 1 | 1 | 4 | 0    | 7.8    | 67.618   | 0        | 9.9823   | 97361000 | 0        | 10028000 | 940650   | 86343000 | 0        | 1095200 | 1543300  | 2434800 |         |
| Q8WXE9    | Q8WXE9 | Stonin-2                                         | STON2      | sp Q8WXE9 | 3  | 3 | 3 | 0 | 0 | 3 | 0  | 0 | 3 | 0 | 0 | 3    | 5      | 101.16   | 0        | 15.714   | 97258000 | 0        | 0        | 0        | 97258000 | 0        | 0       | 0        | 3999800 |         |
| Q7RTP6    | Q7RTP6 | Protein-methionine sulfoxide oxidase MICAL3      | MICAL3     | sp Q7RTP6 | 2  | 2 | 2 | 0 | 1 | 1 | 2  | 0 | 1 | 1 | 2 | 0    | 1.4    | 224.29   | 0        | 5.8645   | 97221000 | 0        | 23626000 | 11120000 | 62241000 | 0        | 2191500 | 7862900  | 2060700 |         |
| Q00423    | Q00423 | Echinoderm microtubule-associated protein-like   | EML1       | sp Q00423 | 3  | 3 | 3 | 0 | 3 | 0 | 3  | 0 | 3 | 0 | 3 | 0    | 6.3    | 89.86    | 0        | 18.811   | 96856000 | 0        | 19480000 | 0        | 77335000 | 0        | 1658200 | 0        | 3239500 |         |
| Q9UFW8    | Q9UFW8 | CGG triplet repeat-binding protein 1             | CGGBP1     | sp Q9UFW8 | 3  | 3 | 3 | 0 | 3 | 2 | 3  | 0 | 3 | 2 | 3 | 0    | 19.2   | 18.82    | 0        | 5.4181   | 96796000 | 0        | 37073000 | 1817300  | 57904000 | 0        | 3694900 | 1461700  | 1713900 |         |
| Q95260    | Q95260 | Arginyl-tRNA--protein transferase 1              | ATE1       | sp Q95260 | 4  | 2 | 2 | 0 | 1 | 0 | 2  | 0 | 1 | 0 | 2 | 0    | 6.8    | 59.09    | 0.001175 | 3.0456   | 9678000  | 0        | 20832000 | 0        | 75948000 | 0        | 0       | 0        | 3123400 |         |
| P48681    | P48681 | Nestin                                           | NES        | sp P48681 | 4  | 4 | 4 | 1 | 1 | 2 | 4  | 1 | 1 | 2 | 4 | 1    | 2.5    | 177.44   | 0        | 6.9068   | 96651000 | 355510   | 7969200  | 6783800  | 81543800 | 1477700  | 969390  | 3843100  | 2679900 |         |
| Q75494    | Q75494 | Serine/arginine-rich splicing factor 10          | SRSF10     | sp Q75494 | 2  | 2 | 2 | 0 | 2 | 1 | 0  | 2 | 1 | 0 | 2 | 1    | 8.8    | 31.3     | 0        | 6.1475   | 96612000 | 0        | 39197000 | 3365700  | 54049000 | 0        | 3455200 | 2261800  | 2222800 |         |
| Q9Y6D6    | Q9Y6D6 | Brefeldin A-inhibited guanine nucleotide-exchang | ARFGEF1    | sp Q9Y6D6 | 10 | 6 | 6 | 0 | 5 | 2 | 10 | 0 | 3 | 1 | 6 | 7.4  | 208.76 | 0        | 10.994   | 96572000 | 0        | 9958100  | 879610   | 85735000 | 0        | 1047200  | 70750   | 3281000  |         |         |
| Q5T8B1    | Q5T8B1 | Ribonuclease H2 subunit B                        | RNASEH2B   | sp Q5T8B1 | 3  | 3 | 3 | 0 | 3 | 0 | 3  | 0 | 3 | 0 | 3 | 0    | 3      | 12.8     | 35.138   | 0        | 25.224   | 96560000 | 0        | 58079000 | 0        | 34842000 | 0       | 5117600  | 0       | 1546400 |
| Q9H0P0    | Q9H0P0 | Cytosolic 5'-nucleotidase 3A                     | NTSC3A     | sp Q9H0P0 | 4  | 4 | 4 | 0 | 4 | 0 | 3  | 0 | 4 | 0 | 3 | 0    | 18.8   | 37.948   | 0        | 35.351   | 96496000 | 0        | 33822000 | 0        | 62674000 | 0        | 3208500 | 0        | 2350300 |         |
| Q8NCG7    | Q8NCG7 | Sn1-specific diacylglycerol lipase beta          | DAGLB      | sp Q8NCG7 | 3  | 3 | 3 | 0 | 3 | 0 | 3  | 0 | 3 | 0 | 3 | 0    | 6.4    | 73.731   | 0        | 10.277   | 96476000 | 0        | 16711000 | 0        | 70365000 | 0        | 2301200 | 0        | 2894200 |         |
| A1A456    | A1A456 | Rho GTPase-activating protein 10                 | ARHGAP10   | sp A1A456 | 2  | 2 | 2 | 0 | 0 | 2 | 0  | 2 | 0 | 0 | 2 | 3.1  | 89.374 | 0        | 5.9881   | 9647000  | 0        | 0        | 0        | 9647000  | 0        | 0        | 0       | 3967400  |         |         |
| P13716    | P13716 | Delta-aminolevulinic acid dehydratase            | ALAD       | sp P13716 | 3  | 3 | 3 | 0 | 2 | 1 | 3  | 0 | 2 | 1 | 3 | 17.9 | 36.294 | 0        | 10.691   | 9630000  | 0        | 18730000 | 2430900  | 75139000 | 0        | 1794500  | 2428100 | 2152100  |         |         |
| Q13523    | Q13523 | Serine/threonine-protein kinase PRP4 homolog     | PRPF4B     | sp Q13523 | 5  | 5 | 5 | 0 | 4 | 1 | 3  | 0 | 4 | 1 | 3 | 7.6  | 116.99 | 0        | 26.104   | 96229000 | 0        | 46126000 | 2515400  | 47588000 | 0        | 2805600  | 2766000 | 2141700  |         |         |
| Q9NYA1    | Q9NYA1 | Sphingosine kinase 1                             | SPHK1      | sp Q9NYA1 | 4  | 4 | 4 | 0 | 1 | 3 | 0  | 4 | 1 | 3 | 0 | 8.1  | 42.517 | 0        | 6.9207   | 96197000 | 0        | 1754600  | 383120   | 94059000 | 0        | 371870   | 318210  | 3590300  |         |         |
| Q92542    | Q92542 | Nicastroin                                       | NCSTN      | sp Q92542 | 2  | 2 | 2 | 0 | 2 | 1 | 2  | 0 | 2 | 1 | 2 | 2.7  | 78.41  | 0.000714 | 3.2037   | 96031000 | 1750400  | 29189000 | 3519100  | 65323000 | 0        | 2051400  | 1784200 | 2444700  |         |         |
| Q9BYN8    | Q9BYN8 | 28S ribosomal protein S26, mitochondrial         | MRPS26     | sp Q9BYN8 | 4  | 4 | 4 | 1 | 4 | 1 | 4  | 1 | 1 | 4 | 1 | 23.9 | 24.211 | 0        | 8.5214   | 96019000 | 1750400  | 69827000 | 1658400  | 24076000 | 1746700  | 5839500  | 656000  | 900830   |         |         |
| Q7L592    | Q7L592 | NADH dehydrogenase [ubiquinone] complex 1, as    | NDUFAF7    | sp Q7L592 | 4  | 4 | 4 | 0 | 4 | 0 | 3  | 0 | 4 | 0 | 3 | 0    | 12.5   | 49.237   | 0        | 15.082   | 95927000 | 0        | 62763000 | 0        | 33163000 | 0        | 5532500 | 0        | 0       |         |
| Q15628    | Q15628 | Tumor necrosis factor receptor type 1-associated | TRADD      | sp Q15628 | 3  | 3 | 3 | 0 | 2 | 0 | 3  | 0 | 2 | 0 | 3 | 0    | 12.5   | 34.247   | 0        | 11.849   | 95900000 | 0        | 4714000  | 0        | 91186000 | 0        | 1157700 | 0        | 3007900 |         |
| Q96BP3    | Q96BP3 | Peptidylprolyl isomerase domain and WD repeat    | PPWD1      | sp Q96BP3 | 5  | 5 | 5 | 0 | 4 | 0 | 3  | 0 | 4 | 0 | 3 | 0    | 9.8    | 73.574   | 0        | 12.604   | 95866000 | 0        | 52330000 | 0        | 43366000 | 0        | 3836400 | 0        | 2566900 |         |
| Q9UDX4;Q  | Q9UDX4 | SEC14-like protein 3;SEC14-like protein 2        | SEC14L3;S1 | sp Q9UDX4 | 1  | 1 | 1 | 0 | 0 | 1 | 0  | 0 | 1 | 0 | 0 | 1    | 5.5    | 46.048   | 0        | 7.6888   | 95841000 | 0        | 0        | 0        | 95841000 | 0        | 0       | 0        | 3941500 |         |
| Q969M2    | Q969M2 | GPI transamidase component PIG-T                 | PIGT       | sp Q969M2 | 2  | 2 | 2 | 0 | 1 | 2 | 0  | 1 | 2 | 0 | 1 | 2    | 5      | 65.699   | 0        | 5.1711   | 95806000 | 901230   | 0        | 717970   | 94186000 | 0        | 0       | 0        | 3873500 |         |
| Q9BYM2    | Q9BYM2 | Protein DPCD                                     | DPCD       | sp Q9BYM2 | 4  | 4 | 4 | 0 | 4 | 0 | 2  | 0 | 4 | 0 | 2 | 17.2 | 23.239 | 0        | 6.0122   | 95680000 | 0        | 0        | 41093000 | 0        | 54594000 | 0        | 3237900 | 0        | 2629700 |         |
| Q96EY5    | Q96EY5 | Multivesicular body subunit 12A                  | MVB12A     | sp Q96EY5 | 2  | 2 | 2 | 0 | 2 | 0 | 2  | 0 | 2 | 0 | 2 | 15   | 28.783 | 0        | 6.9372   | 95628000 | 0        | 24510000 | 0        | 71118000 | 0        | 1676600  | 0       | 3408700  |         |         |
| P08134;P6 | P08134 | Rho-related GTP-binding protein Rhoc             | RHOC       | sp P08134 | 2  | 2 | 2 | 0 | 4 | 2 | 5  | 0 | 1 | 2 | 0 | 36.2 | 22.006 | 0.0037   | 1.9548   | 95490000 | 0        | 5868400  | 249070   | 99373000 | 0        | 295620   | 170430  | 3890100  |         |         |
| A1X283    | A1X283 | SH3 and PX domain-containing protein 2B          | SH3PXD2B   | sp A1X283 | 3  | 3 | 3 | 0 | 2 | 0 | 3  | 0 | 2 | 0 | 3 | 6.4  | 101.58 | 0        | 9.7033   | 95420000 | 0        | 9402200  | 0        | 86018000 | 0        | 1212600  | 0       | 3153800  |         |         |
| Q96ER9    | Q96ER9 | Coiled-coil domain-containing protein 51         | CDC51      | sp Q96ER9 | 6  | 6 | 6 | 0 | 5 | 1 | 6  | 0 | 5 | 1 | 6 | 18   | 45.811 | 0        | 30.645   | 95265000 | 0        | 52196000 | 2448500  | 40620000 | 0        | 2849600  | 3863300 | 1204100  |         |         |
| Q15056    | Q15056 | Synaptojanin-2                                   | SYNJ2      | sp Q15056 | 6  | 6 | 6 | 0 | 6 | 0 | 6  | 0 | 6 | 0 | 6 | 8.3  | 165.54 | 0        | 19.8     |          |          |          |          |          |          |          |         |          |         |         |

|          |          |                                                             |             |    |   |   |   |    |   |   |   |   |   |   |   |   |   |      |        |        |          |          |          |          |          |          |           |          |          |          |         |         |
|----------|----------|-------------------------------------------------------------|-------------|----|---|---|---|----|---|---|---|---|---|---|---|---|---|------|--------|--------|----------|----------|----------|----------|----------|----------|-----------|----------|----------|----------|---------|---------|
| Q15050   | Q15050   | Ribosome biogenesis regulatory protein homolog RRS1         | sj Q15050C  | 3  | 3 | 3 | 0 | 2  | 3 | 1 | 0 | 2 | 3 | 1 | 0 | 2 | 3 | 1    | 11.8   | 41.193 | 0        | 12.894   | 90407000 | 0        | 25391000 | 30543000 | 34473000  | 0        | 2806700  | 19034000 | 2339300 |         |
| P78356   | P78356   | Phosphatidylinositol 5-phosphate 4-kinase type 2 PIP4K2B    | sj P78356   | 6  | 6 | 4 | 0 | 1  | 0 | 6 | 0 | 1 | 0 | 6 | 0 | 1 | 0 | 4    | 18     | 47.377 | 0        | 11.558   | 90266000 | 0        | 4771100  | 0        | 85495000  | 0        | 420570   | 0        | 3516000 |         |
| Q9Y4R8   | Q9Y4R8   | Telomere length regulation protein TEL2 homolog TELO2       | sj Q9Y4R8   | 5  | 5 | 5 | 0 | 3  | 2 | 4 | 0 | 3 | 2 | 4 | 0 | 3 | 2 | 4    | 8.2    | 91.746 | 0        | 18.972   | 90100000 | 0        | 10578000 | 4975800  | 78934000  | 0        | 997660   | 612430   | 2900000 |         |
| Q5VZ5E   | Q5VZ5E   | N-alpha-acetyltransferase 35, Na(+)-auxiliary subunit NAA35 | sj Q5VZ5E   | 2  | 2 | 2 | 0 | 2  | 0 | 2 | 0 | 2 | 0 | 2 | 0 | 2 | 0 | 2    | 4.7    | 83.638 | 0        | 11.664   | 89965000 | 0        | 14279000 | 0        | 75687000  | 0        | 975620   | 0        | 3395700 |         |
| Q8TER5   | Q8TER5   | Rho guanine nucleotide exchange factor 40                   | sj ARHGEF40 | 9  | 9 | 9 | 0 | 4  | 0 | 4 | 0 | 4 | 0 | 4 | 0 | 4 | 0 | 9    | 8      | 164.66 | 0        | 17.11    | 89788000 | 0        | 6        | 6236800  | 83551000  | 0        | 0        | 5897900  | 1279300 |         |
| Q81YQ7   | Q81YQ7   | Threonine synthase-like 1                                   | sj THNSL1   | 4  | 4 | 4 | 0 | 4  | 0 | 4 | 0 | 4 | 0 | 4 | 0 | 4 | 0 | 3    | 7      | 83.069 | 0        | 12.499   | 89667000 | 0        | 41813000 | 0        | 47854000  | 0        | 3128500  | 0        | 2525200 |         |
| Q95671   | Q95671   | N-acetylserotonin O-methyltransferase-like prote            | sj ASMTL    | 2  | 2 | 2 | 0 | 2  | 0 | 2 | 0 | 2 | 0 | 2 | 0 | 2 | 0 | 2    | 7.6    | 68.856 | 0        | 5.9171   | 89379000 | 0        | 0        | 0        | 89379000  | 0        | 0        | 0        | 3675800 |         |
| Q43813   | Q43813   | LanC-like protein 1                                         | sj LANCL1   | 3  | 3 | 3 | 1 | 1  | 2 | 2 | 1 | 1 | 2 | 2 | 1 | 1 | 2 | 2    | 8      | 45.283 | 0        | 7.5777   | 89273000 | 1351400  | 16549000 | 6208700  | 65164000  | 1768700  | 2428900  | 3078300  | 2163300 |         |
| P80217   | P80217   | Interferon-induced 35 kDa protein                           | sj IFI35    | 3  | 3 | 3 | 0 | 1  | 0 | 3 | 0 | 1 | 0 | 3 | 0 | 1 | 0 | 3    | 13.3   | 31.546 | 0        | 9.6105   | 89159000 | 0        | 14804000 | 0        | 87679000  | 0        | 1153600  | 0        | 2582700 |         |
| Q9JFC0   | Q9JFC0   | Leucine-rich repeat and WD repeat-containing pr             | sj LRWD1    | 3  | 3 | 3 | 0 | 3  | 0 | 3 | 0 | 3 | 0 | 3 | 0 | 3 | 0 | 2    | 6.2    | 70.86  | 0        | 9.9845   | 89072000 | 0        | 50799000 | 0        | 38282000  | 0        | 2979200  | 0        | 3072300 |         |
| Q9NR9P   | Q9NR9P   | Oligosaccharyltransferase complex subunit OSTC              | sj Q9NR9P   | 1  | 1 | 1 | 0 | 1  | 0 | 1 | 0 | 1 | 0 | 1 | 0 | 1 | 0 | 1    | 8.1    | 16.829 | 0.000246 | 3.6322   | 88912000 | 0        | 34652000 | 0        | 54289000  | 0        | 3054600  | 0        | 2331400 |         |
| Q8HWUR   | Q8HWUR   | UDP205 protein C15orf40                                     | sj C15orf40 | 2  | 2 | 2 | 0 | 2  | 1 | 2 | 0 | 2 | 1 | 2 | 0 | 2 | 1 | 2    | 13.7   | 16.353 | 0        | 7.1175   | 88847000 | 0        | 43211000 | 2659200  | 42977000  | 0        | 2222900  | 3636800  | 1505800 |         |
| Q75449   | Q75449   | Katanin p60 ATPase-containing subunit A1                    | sj KATNA1   | 4  | 4 | 4 | 0 | 3  | 0 | 4 | 0 | 3 | 0 | 4 | 0 | 3 | 0 | 4    | 10.4   | 55.964 | 0        | 9.0027   | 88811000 | 0        | 28491000 | 0        | 60319000  | 0        | 2869200  | 0        | 2123000 |         |
| Q81VF6A2 | Q81VF6A2 | Ankyrin repeat domain-containing protein 18A;A              | sj ANKRD18A | 2  | 2 | 2 | 0 | 1  | 1 | 2 | 0 | 1 | 1 | 2 | 0 | 1 | 1 | 2    | 2.6    | 111.65 | 0.004116 | 1.9076   | 88802000 | 0        | 28932000 | 6307600  | 53562000  | 0        | 3118600  | 4018200  | 1856800 |         |
| Q12981   | Q12981   | Vesicle transport protein SEC20                             | sj BNIP1    | 3  | 3 | 3 | 0 | 3  | 1 | 2 | 0 | 3 | 1 | 2 | 0 | 3 | 1 | 2    | 17.1   | 26.132 | 0        | 14.666   | 88523000 | 0        | 55952000 | 2301100  | 30270000  | 0        | 3765300  | 2046200  | 1911700 |         |
| Q9NUT2   | Q9NUT2   | ATP-binding cassette sub-family B member 8, mit             | sj ABC88    | 2  | 2 | 2 | 0 | 3  | 0 | 2 | 0 | 2 | 0 | 2 | 0 | 2 | 0 | 2    | 5.9    | 79.988 | 0        | 19.237   | 88515000 | 0        | 6212800  | 0        | 82303000  | 0        | 624090   | 0        | 3308300 |         |
| Q15648   | Q15648   | Mediator of RNA polymerase II transcription subu            | sj MED1     | 5  | 5 | 5 | 0 | 3  | 3 | 3 | 0 | 5 | 3 | 3 | 0 | 5 | 3 | 3    | 5.3    | 168.48 | 0        | 15.608   | 88365000 | 0        | 52430000 | 3212200  | 32723000  | 0        | 3608300  | 2528500  | 1989200 |         |
| Q96D17   | Q96D17   | US small nuclear ribonucleoprotein 40 kDa prote             | sj SNRNP40  | 4  | 4 | 4 | 1 | 4  | 3 | 2 | 1 | 4 | 3 | 2 | 1 | 4 | 3 | 2    | 18.5   | 39.31  | 0        | 11.288   | 88232000 | 2207000  | 37964000 | 5778700  | 42282000  | 3922500  | 1669900  | 3234200  | 2351700 |         |
| Q10570   | Q10570   | Cleavage and polyadenylation specificity factor             | sj CPSF1    | 5  | 5 | 5 | 0 | 5  | 1 | 4 | 0 | 5 | 1 | 4 | 0 | 5 | 1 | 4    | 0      | 5.7    | 160.88   | 0        | 16.47    | 88119000 | 0        | 41250000 | 1603000   | 45266000 | 0        | 3787600  | 1154400 | 1633000 |
| Q96526   | Q96526   | CDK5 regulatory subunit-associated protein 1                | sj CDK5RAP1 | 3  | 3 | 3 | 0 | 2  | 1 | 3 | 0 | 2 | 1 | 3 | 0 | 2 | 1 | 3    | 7.2    | 67.688 | 0        | 26.084   | 88104000 | 0        | 36758000 | 0        | 51347000  | 0        | 3781400  | 0        | 1570400 |         |
| Q75629   | Q75629   | Protein CREG1                                               | sj CREG1    | 1  | 1 | 1 | 0 | 1  | 1 | 0 | 1 | 1 | 0 | 1 | 0 | 1 | 1 | 0    | 9.5    | 24.074 | 0        | 4.3327   | 88056000 | 0        | 20122000 | 67933000 | 0         | 1773800  | 45651000 | 0        | 0       |         |
| Q9H0W8   | Q9H0W8   | Protein SMG9                                                | sj SMG9     | 5  | 5 | 5 | 0 | 2  | 0 | 5 | 0 | 2 | 0 | 5 | 0 | 2 | 0 | 5    | 20.6   | 57.65  | 0        | 13.33    | 87720000 | 0        | 12614000 | 0        | 51706000  | 0        | 2179300  | 0        | 2021400 |         |
| Q95239;Q | Q95239;Q | Chromosome-associated kinesin KIF4A;Chromoso                | sj KIF4A    | 7  | 6 | 6 | 1 | 7  | 3 | 5 | 1 | 6 | 3 | 4 | 1 | 6 | 3 | 4    | 1      | 6.3    | 139.88   | 0        | 11.604   | 87682000 | 889150   | 45756000 | 5199900   | 35836000 | 1428600  | 3472000  | 2529300 | 2460700 |
| Q9UMR2   | Q9UMR2   | ATP-dependent RNA helicase DDX19B                           | sj DDX19B   | 13 | 2 | 2 | 1 | 13 | 0 | 9 | 0 | 2 | 0 | 0 | 0 | 0 | 0 | 0    | 36.3   | 53.926 | 0        | 32.675   | 87581000 | 0        | 87581000 | 0        | 0         | 0        | 0        | 7720200  | 0       | 0       |
| Q81V08   | Q81V08   | Phospholipase D3                                            | sj PLD3     | 2  | 2 | 2 | 0 | 1  | 1 | 2 | 0 | 1 | 1 | 2 | 0 | 1 | 1 | 2    | 4.1    | 54.705 | 0        | 5.1803   | 87501000 | 0        | 6476100  | 1410900  | 79614000  | 0        | 961290   | 0        | 2883800 |         |
| P57105   | P57105   | Synaptotagmin-2-binding protein                             | sj SYN1ZBP  | 2  | 2 | 2 | 0 | 1  | 0 | 2 | 0 | 1 | 0 | 2 | 0 | 1 | 0 | 2    | 17.9   | 15.928 | 0        | 7.884    | 87431000 | 0        | 13443000 | 0        | 73987000  | 0        | 1923900  | 0        | 2303900 |         |
| Q9C040   | Q9C040   | Tripartite motif-containing protein 2                       | sj TRIM2    | 3  | 3 | 3 | 0 | 3  | 1 | 0 | 0 | 3 | 1 | 0 | 0 | 3 | 1 | 0    | 3      | 5.1    | 81.529   | 0.000247 | 3.6579   | 87402000 | 832280   | 0        | 886570000 | 2767700  | 0        | 0        | 1624800 | 0       |
| P18615   | P18615   | Negative elongation factor 2                                | sj NELFE    | 5  | 5 | 5 | 0 | 3  | 0 | 3 | 0 | 4 | 0 | 3 | 0 | 4 | 0 | 3    | 19.7   | 43.239 | 0        | 10.84    | 87370000 | 0        | 45716000 | 0        | 41654000  | 0        | 4005300  | 0        | 1373600 |         |
| P84090   | P84090   | Enhancer of rudimentary homolog                             | sj ERH      | 3  | 3 | 3 | 1 | 3  | 2 | 2 | 1 | 3 | 2 | 2 | 1 | 3 | 2 | 2    | 27.9   | 12.259 | 0        | 21.08    | 87359000 | 40888000 | 2111600  | 21784000 | 24238000  | 2706900  | 906660   | 643870   | 0       |         |
| P61769   | P61769   | Beta-2-microglobulin;Beta-2-microglobulin form              | sj B2M      | 2  | 2 | 2 | 0 | 2  | 1 | 0 | 2 | 0 | 2 | 1 | 0 | 2 | 0 | 2    | 16.8   | 13.714 | 0        | 5.6571   | 87301000 | 0        | 2369900  | 0        | 84931000  | 0        | 452920   | 0        | 3248800 |         |
| Q95772   | Q95772   | MLN64 N-terminal domain homolog                             | sj STAR23NL | 2  | 2 | 2 | 0 | 2  | 1 | 2 | 0 | 2 | 1 | 2 | 0 | 2 | 1 | 2    | 14.1   | 26.654 | 0        | 10.272   | 87298000 | 0        | 18259000 | 5335400  | 63703000  | 0        | 1145800  | 4739200  | 1929700 |         |
| Q9NW64   | Q9NW64   | Pre-mRNA-splicing factor RBM22                              | sj RBM22    | 4  | 4 | 4 | 0 | 4  | 3 | 3 | 0 | 4 | 3 | 3 | 0 | 4 | 3 | 3    | 10.5   | 46.895 | 0        | 4.5769   | 87189000 | 0        | 44547000 | 4419700  | 38222000  | 0        | 3312200  | 2087800  | 3068700 |         |
| P00749   | P00749   | Urokinase-type plasminogen activator;Urokinase              | sj PLAU     | 4  | 4 | 4 | 0 | 4  | 2 | 4 | 0 | 0 | 2 | 4 | 0 | 0 | 2 | 4    | 13.2   | 48.507 | 0        | 17.224   | 87085000 | 0        | 0        | 2035100  | 40560000  | 0        | 0        | 2415500  | 2449800 | 0       |
| Q9UGJ0   | Q9UGJ0   | 5-AMP-activated protein kinase subunit gamma-2              | sj PRKAG2   | 1  | 1 | 1 | 0 | 0  | 1 | 0 | 0 | 1 | 0 | 0 | 0 | 1 | 0 | 0    | 3.2    | 63.065 | 0        | 7.4276   | 86938000 | 0        | 0        | 0        | 86938000  | 0        | 0        | 0        | 3575400 |         |
| Q6GMV2   | Q6GMV2   | SET and MYND domain-containing protein 5                    | sj SMYD5    | 2  | 2 | 2 | 1 | 2  | 1 | 2 | 1 | 2 | 1 | 2 | 1 | 2 | 1 | 2    | 7.2    | 47.34  | 0        | 8.3395   | 86866000 | 25964000 | 15364000 | 1281400  | 44257000  | 25510000 | 79196    | 2633300  | 1064000 |         |
| Q5M775   | Q5M775   | Cytosin-b                                                   | sj SPEC11   | 7  | 7 | 7 | 0 | 1  | 7 | 4 | 0 | 1 | 7 | 4 | 0 | 1 | 7 | 4    | 8.8    | 118.58 | 0        | 13.38    | 86691000 | 0        | 18662000 | 32395000 | 35635000  | 0        | 1140400  | 22548000 | 1198900 |         |
| Q9NXW2   | Q9NXW2   | Dnal homolog subfamily B member 12                          | sj DNAI12   | 4  | 4 | 4 | 0 | 1  | 4 | 4 | 0 | 1 | 4 | 4 | 0 | 1 | 4 | 4    | 16.5   | 41.859 | 0        | 8.4379   | 86619000 | 0        | 6668100  | 8437900  | 71440000  | 0        | 1510000  | 4752000  | 2903000 |         |
| Q9HCK8;Q | Q9HCK8;Q | Chromodomain-helicase-DNA-binding protein 8;                | sj CHD8;CHD | 5  | 5 | 4 | 0 | 5  | 1 | 4 | 0 | 5 | 1 | 4 | 0 | 5 | 1 | 4    | 0      | 2.9    | 290.52   | 0        | 3409900  | 1328400  | 51175000 | 0        | 2432600   | 1729400  | 1841100  | 0        | 0       |         |
| Q43505   | Q43505   | Beta-1,4-glucuronidyltransferase 1                          | sj B4GAT1   | 3  | 3 | 3 | 0 | 1  | 1 | 3 | 0 | 1 | 1 | 3 | 0 | 1 | 1 | 3    | 12.3   | 47.119 | 0        | 21.005   | 86443000 | 0        | 15234000 | 681070   | 70527000  | 0        | 2127000  | 1436300  | 1134000 |         |
| Q95470   | Q95470   | Sphingosine-1-phosphate lyase 1                             | sj SGPL1    | 4  | 4 | 4 | 0 | 4  | 0 | 2 | 0 | 4 | 0 | 2 | 0 | 4 | 0 | 2    | 8.5    | 63.523 | 0        | 5.836    | 86381000 | 0        | 37014000 | 0        | 49366000  | 0        | 3078000  | 0        | 2222200 |         |
| P42575   | P42575   | Caspase-2,Caspase-2 subunit p18;Caspase-2 sub               | sj CASP2    | 3  | 3 | 3 | 0 | 3  | 0 | 3 | 0 | 3 | 0 | 3 | 0 | 3 | 0 | 3    | 9.3    | 50.685 | 0        | 5.2861   | 86292000 | 0        | 56374000 | 0        | 29918000  | 0        | 4615800  | 0        | 1583900 |         |
| Q92930   | Q92930   | Ras-related protein Rab-8B                                  | sj RAB8B    | 3  | 2 | 2 | 0 | 1  | 5 | 0 | 2 | 0 | 2 | 0 | 2 | 0 | 2 | 29   | 23.584 | 0      | 10.139   | 86241000 | 0        | 0        | 0        | 86241000 | 0         | 0        | 0        | 3546700  |         |         |
| Q14487   | Q14487   | AT-rich interactive domain-containing protein 1A            | sj ARID1A   | 5  | 5 | 5 | 0 | 3  | 1 | 4 | 0 | 3 | 1 | 4 | 0 | 3 | 1 | 4    | 3.7    | 242.04 | 0        | 13.145   | 86199000 | 0        | 20853000 | 1131500  | 64215000  | 0        | 641840   | 2021000  | 1848700 |         |
| Q969M3   | Q969M3   | Protein YIPF5                                               | sj YIPF5    | 2  | 2 | 2 | 0 | 1  | 2 | 0 | 1 | 1 | 2 | 0 | 1 | 1 | 2 | 18.7 | 27.989 | 0      | 6.2143   | 86174000 | 0        | 7571600  | 2157200  | 7645000  | 0         | 1032900  | 2235400  | 1996200  |         |         |
| Q9JUN3   | Q9JUN3   | Charged multivesicular body protein 2b                      | sj CHMP2B   | 4  | 4 | 4 | 1 | 3  | 2 | 4 | 1 | 3 | 2 | 4 | 1 | 3 | 2 | 4    | 17.8   | 23.906 | 0        | 6.7976   | 86022000 | 49581    | 23439000 | 940190   | 61593000  | 155820   | 2461700  | 601650   | 2061500 |         |
| Q8N2G8   | Q8N2G8   | H3 domain-containing protein                                | sj GHDC     | 3  | 3 | 3 | 0 | 2  | 0 | 3 | 0 | 2 | 0 | 3 |   |   |   |      |        |        |          |          |          |          |          |          |           |          |          |          |         |         |

|                      |                      |                                                                                                                                                                   |                 |           |    |   |   |   |    |   |   |   |   |   |   |   |   |   |      |        |        |          |          |          |          |          |           |          |          |         |         |          |         |
|----------------------|----------------------|-------------------------------------------------------------------------------------------------------------------------------------------------------------------|-----------------|-----------|----|---|---|---|----|---|---|---|---|---|---|---|---|---|------|--------|--------|----------|----------|----------|----------|----------|-----------|----------|----------|---------|---------|----------|---------|
| Q9H201               | Q9H201               | Epsin-3                                                                                                                                                           | EPN3            | sp Q9H201 | 2  | 1 | 1 | 0 | 2  | 0 | 2 | 0 | 1 | 0 | 1 | 0 | 1 | 0 | 1    | 3.5    | 68.221 | 0.001138 | 2.5362   | 81546000 | 0        | 13108000 | 0         | 68438000 | 0        | 1155500 | 0       | 2814600  |         |
| P09132               | P09132               | Signal recognition particle 19 kDa protein                                                                                                                        | SRP19           | sp P09132 | 3  | 2 | 3 | 1 | 2  | 1 | 3 | 1 | 2 | 1 | 3 | 1 | 2 | 1 | 3    | 19.4   | 16.156 | 0        | 12.712   | 81537000 | 385320   | 32704000 | 423710    | 48023000 | 489760   | 2535200 | 621730  | 1881200  |         |
| Q8NB6F               | Q8NB6F               | Late secretory pathway protein AVL9 homolog                                                                                                                       | AVL9            | sp Q8NB6F | 2  | 2 | 3 | 0 | 1  | 0 | 2 | 0 | 1 | 0 | 2 | 0 | 1 | 0 | 2    | 9.6    | 71.947 | 0        | 20.593   | 81496000 | 0        | 72097000 | 0         | 74287000 | 0        | 1458500 | 0       | 2234900  |         |
| Q13362               | Q13362               | Serine/threonine-protein phosphatase 2A 56 kDa PPP2R5C                                                                                                            | PPP2R5C         | sp Q13362 | 6  | 2 | 4 | 0 | 0  | 3 | 2 | 6 | 0 | 0 | 0 | 2 | 0 | 0 | 2    | 19.5   | 61.06  | 0        | 74.484   | 81234000 | 0        | 0        | 0         | 81234000 | 0        | 0       | 0       | 3340800  |         |
| P50750               | P50750               | Cyclin-dependent kinase 9                                                                                                                                         | CDK9            | sp P50750 | 5  | 5 | 4 | 2 | 4  | 3 | 5 | 0 | 3 | 2 | 4 | 0 | 3 | 2 | 4    | 15.1   | 42.777 | 0        | 10.615   | 81233000 | 0        | 37411000 | 5145100   | 38676000 | 0        | 2536400 | 4029500 | 1780000  |         |
| Q9UM22               | Q9UM22               | Mammalian ependymin-related protein 1                                                                                                                             | EPDR1           | sp Q9UM22 | 2  | 2 | 2 | 0 | 1  | 2 | 2 | 0 | 1 | 2 | 2 | 0 | 1 | 2 | 2    | 8.5    | 25.437 | 0        | 3.9837   | 81229000 | 0        | 43787000 | 4185000   | 72665000 | 0        | 0       | 4448600 | 1352100  |         |
| Q9696G               | Q9696G               | Riboflavin kinase                                                                                                                                                 | RFK             | sp Q9696G | 2  | 2 | 2 | 0 | 0  | 0 | 2 | 0 | 0 | 0 | 2 | 0 | 0 | 0 | 2    | 38.7   | 17.623 | 0        | 5.2823   | 81209000 | 0        | 0        | 0         | 81209000 | 0        | 0       | 0       | 3339800  |         |
| Q9BV6;Q9BV6;Q9BV6    | Q9BV6;Q9BV6;Q9BV6    | U3 small nuclear RNA-associated protein 14 homolog; RNA binding protein fox-1 homolog 2; RNA binding protein fox-1 homolog 2; RNA binding protein fox-1 homolog 2 | UTP14A;U3       | sp Q9BV6  | 2  | 2 | 2 | 0 | 1  | 2 | 2 | 0 | 1 | 2 | 2 | 0 | 1 | 2 | 2    | 3.1    | 87.977 | 0        | 7.0769   | 81051000 | 0        | 5435400  | 10566000  | 65049000 | 0        | 882400  | 7135800 | 2236700  |         |
| Q43251;Q43251;Q43251 | Q43251;Q43251;Q43251 | RNA binding protein fox-1 homolog 2; RNA binding protein fox-1 homolog 2; RNA binding protein fox-1 homolog 2                                                     | RFBFOX2;RFBFOX2 | sp Q43251 | 2  | 2 | 2 | 0 | 0  | 3 | 2 | 0 | 3 | 2 | 0 | 3 | 2 | 0 | 3    | 12.8   | 41.373 | 0        | 8.6581   | 81029000 | 0        | 43313000 | 13369000  | 24347000 | 0        | 8695800 | 8344800 | 1762900  |         |
| Q00461               | Q00461               | Golgi integral membrane protein 4                                                                                                                                 | COL1M4          | sp Q00461 | 4  | 4 | 4 | 1 | 2  | 2 | 3 | 1 | 2 | 2 | 3 | 1 | 2 | 2 | 3    | 6.8    | 81.879 | 0        | 28.489   | 80972000 | 5109600  | 14325000 | 2039900   | 54870000 | 3700100  | 1462800 | 1482500 | 1723100  |         |
| Q6V9VM               | Q6V9VM               | Zinc finger CCH domain-containing protein 18                                                                                                                      | ZC3H18          | sp Q6V9VM | 4  | 4 | 4 | 0 | 0  | 4 | 3 | 0 | 4 | 3 | 4 | 0 | 4 | 3 | 4    | 5.7    | 106.38 | 0        | 6.6809   | 80775000 | 0        | 38670000 | 10447000  | 31657000 | 0        | 3290000 | 6257000 | 2184400  |         |
| Q4G176               | Q4G176               | Acyl-CoA synthetase family member 3, mitochondrion                                                                                                                | ACSFG3          | sp Q4G176 | 3  | 3 | 3 | 0 | 0  | 3 | 0 | 3 | 0 | 3 | 0 | 3 | 0 | 3 | 0    | 5.7    | 64.129 | 0        | 8.884    | 80713000 | 0        | 27228000 | 0         | 53485000 | 0        | 2397500 | 0       | 2202300  |         |
| Q8NB5I               | Q8NB5I               | Solute carrier family 43 member 3                                                                                                                                 | SLC43A3         | sp Q8NB5I | 3  | 3 | 3 | 0 | 0  | 0 | 3 | 0 | 0 | 3 | 0 | 0 | 3 | 0 | 0    | 3      | 4.9    | 54.528   | 0        | 4.8847   | 80548000 | 0        | 0         | 0        | 80548000 | 0       | 0       | 0        | 3312600 |
| Q13642               | Q13642               | Four and a half UIM domains protein 1                                                                                                                             | FHL1            | sp Q13642 | 2  | 2 | 2 | 1 | 2  | 0 | 1 | 1 | 2 | 0 | 1 | 1 | 2 | 0 | 1    | 7.1    | 36.263 | 0        | 5.8822   | 80439000 | 3288600  | 61353000 | 0         | 15798000 | 4273300  | 3767400 | 0       | 1305800  |         |
| Q96DA6               | Q96DA6               | Mitochondrial import inner membrane translocase DNAC19                                                                                                            | DNAC19          | sp Q96DA6 | 1  | 1 | 1 | 1 | 1  | 1 | 1 | 1 | 1 | 1 | 1 | 1 | 1 | 1 | 1    | 12.1   | 12.498 | 0        | 4.8051   | 80346000 | 0        | 38563000 | 4631200   | 37152000 | 0        | 3399300 | 3112100 | 1527900  |         |
| Q8N4P3               | Q8N4P3               | Guanosine-3,5-bis(diphosphate) 3-pyrophosphohydroxy HDDC3                                                                                                         | HDDC3           | sp Q8N4P3 | 1  | 3 | 3 | 0 | 3  | 0 | 3 | 0 | 3 | 0 | 3 | 0 | 3 | 0 | 3    | 0      | 24     | 20.329   | 0        | 18.497   | 80305000 | 0        | 63574000  | 0        | 16731000 | 0       | 4971400 | 0        | 1320700 |
| Q14981               | Q14981               | TATA-binding protein-associated factor 172                                                                                                                        | TAF1            | sp Q14981 | 4  | 4 | 4 | 0 | 2  | 1 | 4 | 0 | 2 | 1 | 4 | 0 | 2 | 1 | 4    | 3.6    | 206.89 | 0        | 11.539   | 80294000 | 0        | 12691000 | 1002100   | 66601000 | 0        | 1292200 | 865700  | 2373200  |         |
| Q4G0F5               | Q4G0F5               | Vacuolar protein sorting-associated protein 26B                                                                                                                   | VPS26B          | sp Q4G0F5 | 3  | 2 | 2 | 0 | 3  | 0 | 2 | 0 | 3 | 0 | 2 | 0 | 2 | 0 | 2    | 9.5    | 39.154 | 0        | 5.1504   | 80231000 | 0        | 28451000 | 0         | 51779000 | 0        | 2700600 | 0       | 1936800  |         |
| Q13405               | Q13405               | 39S ribosomal protein L49, mitochondrial                                                                                                                          | MRPL49          | sp Q13405 | 2  | 2 | 2 | 0 | 1  | 2 | 1 | 0 | 1 | 2 | 1 | 0 | 1 | 2 | 1    | 15.1   | 19.198 | 0        | 4.4582   | 79903000 | 0        | 22290000 | 1967400   | 55646000 | 0        | 1964800 | 1322100 | 2288500  |         |
| Q6NYC8               | Q6NYC8               | Phostensin                                                                                                                                                        | PPP1R18         | sp Q6NYC8 | 3  | 3 | 3 | 0 | 0  | 3 | 0 | 0 | 3 | 0 | 0 | 0 | 0 | 3 | 0    | 8.2    | 67.942 | 0        | 18.848   | 79719000 | 0        | 0        | 0         | 79719000 | 0        | 0       | 0       | 3278500  |         |
| Q14141               | Q14141               | Septin-6                                                                                                                                                          | Sep-06          | sp Q14141 | 10 | 5 | 5 | 1 | 10 | 4 | 5 | 0 | 5 | 0 | 5 | 0 | 5 | 0 | 5    | 26.3   | 49.976 | 0        | 15.025   | 79643000 | 0        | 79643000 | 0         | 79643000 | 0        | 7020400 | 0       | 0        |         |
| Q6P158               | Q6P158               | Putative ATP-dependent RNA helicase DHX57                                                                                                                         | DHX57           | sp Q6P158 | 5  | 4 | 4 | 1 | 4  | 1 | 4 | 0 | 4 | 0 | 4 | 0 | 4 | 0 | 4    | 4.1    | 155.6  | 0.001153 | 2.7157   | 79457000 | 0        | 31403000 | 0         | 48054000 | 0        | 3399100 | 0       | 1345300  |         |
| Q16877;P16877;P16877 | Q16877;P16877;P16877 | 6-phosphofructo-2-kinase/fructose-2,6-bisphosphatase PFKFB4;PFKFB4                                                                                                | PFKFB4          | sp Q16877 | 3  | 3 | 2 | 1 | 0  | 0 | 2 | 1 | 0 | 0 | 2 | 0 | 0 | 2 | 0    | 8.1    | 54.039 | 0        | 5.8036   | 79420000 | 33723000 | 0        | 0         | 0        | 45696000 | 0       | 0       | 0        | 1879300 |
| Q9Y4X5               | Q9Y4X5               | E3 ubiquitin-protein ligase ARIH1                                                                                                                                 | ARIH1           | sp Q9Y4X5 | 4  | 4 | 4 | 0 | 3  | 0 | 3 | 0 | 3 | 0 | 3 | 0 | 3 | 0 | 3    | 11     | 64.117 | 0        | 29.331   | 79193000 | 0        | 44630000 | 0         | 34563000 | 0        | 4537600 | 0       | 8179400  |         |
| Q8TCC3               | Q8TCC3               | 39S ribosomal protein L30, mitochondrial                                                                                                                          | MRPL30          | sp Q8TCC3 | 3  | 3 | 3 | 0 | 3  | 2 | 3 | 0 | 3 | 2 | 3 | 0 | 3 | 2 | 3    | 18     | 18.546 | 0        | 5.7212   | 79109000 | 0        | 29910000 | 2671100   | 46527000 | 0        | 2454800 | 2091500 | 1787100  |         |
| Q86U90               | Q86U90               | YrcD domain-containing protein, mitochondrial                                                                                                                     | YRC3            | sp Q86U90 | 3  | 3 | 3 | 0 | 3  | 0 | 3 | 0 | 3 | 0 | 3 | 0 | 3 | 0 | 3    | 2      | 19     | 29.328   | 0        | 10.019   | 78935000 | 0        | 48412000  | 0        | 30523000 | 0       | 3884500 | 0        | 1638200 |
| Q25204               | Q25204               | Zinc transporter SLC39A7                                                                                                                                          | SLC39A7         | sp Q25204 | 1  | 1 | 1 | 1 | 1  | 1 | 1 | 1 | 1 | 1 | 1 | 1 | 1 | 1 | 1    | 3      | 50.117 | 0        | 4.9011   | 78870000 | 3174500  | 30350000 | 0         | 33282000 | 3174500  | 2675300 | 0       | 1862300  |         |
| Q9BXW9               | Q9BXW9               | Fanconi anemia group D2 protein                                                                                                                                   | FANCD2          | sp Q9BXW9 | 5  | 5 | 5 | 1 | 5  | 1 | 5 | 1 | 5 | 1 | 5 | 1 | 5 | 1 | 5    | 4.9    | 164.13 | 0        | 9.8788   | 78644000 | 61420    | 48232000 | 457980    | 29340000 | 1926900  | 2797400 | 0       | 1348200  |         |
| Q9UNN5               | Q9UNN5               | FAS-associated factor 1                                                                                                                                           | FAF1            | sp Q9UNN5 | 7  | 7 | 7 | 7 | 1  | 0 | 7 | 1 | 0 | 7 | 1 | 0 | 7 | 1 | 0    | 13.7   | 73.953 | 0        | 29.475   | 78610000 | 0        | 77209000 | 1300800   | 0        | 0        | 0       | 1474000 | 874100   | 0       |
| Q9H2H8               | Q9H2H8               | Peptidyl-prolyl cis-trans isomerase-like 3                                                                                                                        | PPII3           | sp Q9H2H8 | 2  | 2 | 2 | 0 | 1  | 1 | 2 | 0 | 1 | 1 | 2 | 0 | 1 | 1 | 2    | 16.1   | 18.154 | 0        | 8.6472   | 78558000 | 0        | 14473000 | 1292900   | 62792000 | 0        | 2002200 | 1363500 | 1361300  |         |
| Q15154               | Q15154               | Pericentriolar material 1 protein                                                                                                                                 | PCM1            | sp Q15154 | 5  | 5 | 5 | 1 | 5  | 1 | 5 | 1 | 1 | 5 | 1 | 1 | 5 | 1 | 5    | 3.2    | 228.54 | 0        | 10.567   | 78540000 | 23522000 | 3499700  | 2729700   | 48788000 | 24564000 | 322150  | 1915600 | 807100   |         |
| P15309               | P15309               | Prostatic acid phosphatase;PAPF39                                                                                                                                 | ACPP            | sp P15309 | 3  | 3 | 3 | 0 | 0  | 1 | 3 | 0 | 0 | 1 | 3 | 0 | 0 | 1 | 3    | 9.6    | 44.566 | 0        | 7.0107   | 78529000 | 0        | 0        | 684000    | 77845000 | 0        | 512820  | 3148200 | 0        | 0       |
| Q8TED1               | Q8TED1               | Probable glutathione peroxidase 8                                                                                                                                 | GPX8            | sp Q8TED1 | 2  | 2 | 2 | 0 | 2  | 1 | 2 | 0 | 2 | 1 | 2 | 0 | 2 | 1 | 2    | 10     | 23.881 | 0        | 4.7081   | 78499000 | 0        | 12410000 | 1320200   | 64769000 | 0        | 1013200 | 1443700 | 2187800  |         |
| Q96AB3               | Q96AB3               | Isochorismatase domain-containing protein 2, mit                                                                                                                  | ISOC2           | sp Q96AB3 | 2  | 2 | 2 | 0 | 1  | 0 | 1 | 0 | 1 | 0 | 1 | 0 | 1 | 0 | 1    | 20     | 22.337 | 0        | 27.375   | 78440000 | 0        | 6657900  | 0         | 71828000 | 0        | 0       | 0       | 2952100  |         |
| Q75818               | Q75818               | Ribonuclease P protein subunit p40                                                                                                                                | RPP40           | sp Q75818 | 2  | 2 | 2 | 0 | 2  | 1 | 0 | 1 | 0 | 1 | 0 | 1 | 0 | 1 | 10.5 | 41.833 | 0      | 9.2079   | 78412000 | 0        | 51308000 | 3838500  | 123265000 | 0        | 3927900  | 2567400 | 1567300 | 0        | 749500  |
| Q13610               | Q13610               | Periodic tryptophan protein 1 homolog                                                                                                                             | PWP1            | sp Q13610 | 2  | 2 | 2 | 1 | 2  | 0 | 1 | 1 | 2 | 0 | 1 | 1 | 2 | 0 | 1    | 7.2    | 55.827 | 0.000485 | 3.447    | 78376000 | 39884000 | 20272000 | 0         | 18220000 | 40425000 | 1235100 | 0       | 265000   |         |
| Q94832               | Q94832               | Unconventional myosin-Id                                                                                                                                          | MYO1D           | sp Q94832 | 5  | 5 | 5 | 2 | 4  | 2 | 4 | 2 | 4 | 2 | 4 | 2 | 4 | 2 | 4    | 5.2    | 116.2  | 0        | 8.2401   | 78182000 | 9368300  | 28118000 | 1491000   | 39205000 | 5328200  | 2910300 | 3757900 | 2464700  |         |
| Q13188               | Q13188               | Serine/threonine-protein kinase 3;Serine/threonine                                                                                                                | STK3            | sp Q13188 | 3  | 2 | 2 | 0 | 3  | 0 | 3 | 0 | 2 | 0 | 2 | 0 | 2 | 0 | 2    | 7.7    | 56.3   | 0        | 6.417    | 78173000 | 0        | 35373000 | 0         | 42435000 | 0        | 3193800 | 0       | 1701600  |         |
| Q99700               | Q99700               | Ataxin-2                                                                                                                                                          | ATXN2           | sp Q99700 | 4  | 4 | 4 | 0 | 4  | 1 | 2 | 0 | 4 | 1 | 2 | 0 | 4 | 1 | 2    | 8      | 140.28 | 0        | 8.5879   | 77915000 | 0        | 46663000 | 685560    | 30567000 | 0        | 3015500 | 1291600 | 5739900  |         |
| Q75330               | Q75330               | Hyaluronan mediated motility receptor                                                                                                                             | HMMR            | sp Q75330 | 4  | 4 | 4 | 2 | 4  | 2 | 4 | 2 | 4 | 2 | 4 | 2 | 4 | 2 | 4    | 2      | 8.6    | 84.099   | 0        | 15.494   | 77731000 | 0        | 9572900   | 18970000 | 49198000 | 0       | 1585100 | 11816000 | 2214100 |
| Q7LG56               | Q7LG56               | Ribonucleoside-diphosphate reductase subunit M                                                                                                                    | RRM2B           | sp Q7LG56 | 2  | 2 | 2 | 0 | 2  | 0 | 2 | 0 | 2 | 0 | 2 | 0 | 2 | 0 | 2    | 13.7   | 40.736 | 0        | 14.321   | 77539000 | 0        | 32063000 | 0         | 45476000 | 0        | 1846500 | 0       | 280100   |         |
| Q9ULH7               | Q9ULH7               | MKL/myocardin-like protein 2                                                                                                                                      | MKL2            | sp Q9ULH7 | 2  | 2 | 2 | 0 | 3  | 0 | 3 | 0 | 3 | 0 | 3 | 0 | 3 | 0 | 2    | 5.9    | 118.13 | 0.002876 | 2.1578   | 77527000 | 0        | 23676000 | 0         | 53851000 | 0        | 2008600 | 0       | 2293100  |         |
| P07738               | P07738               | Bisphosphoglycerate mutase                                                                                                                                        | BPGM            | sp P07738 | 2  | 2 | 2 | 0 | 1  | 0 | 2 | 0 | 1 | 0 | 2 | 0 | 1 | 0 | 2    | 12.4   | 30.005 | 0        | 12.623   | 77387000 | 0        | 16860000 | 0         | 60587000 | 0        | 1556900 | 0       | 2415600  |         |
| A6NKN2               | A6NKN2               | Putative keratin-87 protein                                                                                                                                       | KRT87P          | sp A6NKN2 |    |   |   |   |    |   |   |   |   |   |   |   |   |   |      |        |        |          |          |          |          |          |           |          |          |         |         |          |         |

|        |        |                                                                  |          |           |    |   |   |   |   |   |    |   |   |   |   |   |   |     |        |        |          |          |          |          |          |          |          |          |          |          |          |          |         |
|--------|--------|------------------------------------------------------------------|----------|-----------|----|---|---|---|---|---|----|---|---|---|---|---|---|-----|--------|--------|----------|----------|----------|----------|----------|----------|----------|----------|----------|----------|----------|----------|---------|
| Q99747 | Q99747 | Gamma-soluble NSF attachment protein                             | NAPG     | sp Q99747 | 3  | 3 | 3 | 0 | 3 | 0 | 2  | 0 | 3 | 0 | 2 | 0 | 3 | 0   | 2      | 12.2   | 34.746   | 0        | 12.77    | 73197000 | 0        | 34355000 | 0        | 38842000 | 0        | 3000600  | 0        | 1625100  |         |
| Q9NZN3 | Q9NZN3 | EH domain-containing protein 3                                   | EHD3     | sp Q9NZN3 | 12 | 3 | 2 | 0 | 6 | 4 | 10 | 0 | 0 | 0 | 2 | 0 | 0 | 0   | 2      | 29.5   | 60.886   | 0        | 4.9069   | 72911000 | 0        | 18422000 | 0        | 54489000 | 0        | 1623900  | 0        | 0        |         |
| Q6NW29 | Q6NW29 | RWD domain-containing protein 4                                  | RWD04    | sp Q6NW29 | 2  | 2 | 2 | 0 | 2 | 0 | 0  | 2 | 0 | 2 | 0 | 2 | 0 | 2   | 0      | 10.1   | 21.25    | 0.00072  | 3.3262   | 72880000 | 0        | 23866000 | 0        | 48994000 | 0        | 2067900  | 0        | 2023700  |         |
| P51617 | P51617 | Interleukin-1 receptor-associated kinase 1                       | IRAK1    | sp P51617 | 4  | 4 | 3 | 0 | 4 | 0 | 0  | 4 | 0 | 2 | 0 | 3 | 0 | 1   | 7.2    | 76.536 | 0        | 19.164   | 72695000 | 0        | 50054000 | 0        | 22640000 | 0        | 3736600  | 0        | 1606700  |          |         |
| Q9BRZ2 | Q9BRZ2 | E3 ubiquitin-protein ligase TRIM56                               | TRIM56   | sp Q9BRZ2 | 3  | 3 | 3 | 0 | 3 | 2 | 0  | 0 | 3 | 2 | 0 | 0 | 3 | 2   | 6.1    | 81.487 | 0        | 13.638   | 72639000 | 0        | 0        | 9339600  | 63299000 | 0        | 0        | 4985600  | 3898300  |          |         |
| Q6NUQ4 | Q6NUQ4 | Transmembrane protein 214                                        | TMEM214  | sp Q6NUQ4 | 2  | 2 | 2 | 0 | 1 | 1 | 2  | 0 | 1 | 1 | 2 | 0 | 1 | 1   | 2      | 3.5    | 77.15    | 0        | 7.4648   | 72558000 | 0        | 11202000 | 3460000  | 57896000 | 0        | 1162900  | 2738300  | 1792300  |         |
| P36639 | P36639 | 7,8-dihydro-8-oxoguanine triphosphatase                          | NUDT1    | sp P36639 | 2  | 2 | 2 | 0 | 2 | 0 | 0  | 0 | 2 | 0 | 0 | 2 | 0 | 0   | 14.2   | 22.519 | 0        | 5.165    | 72437000 | 0        | 72437000 | 0        | 0        | 0        | 6385300  | 0        | 0        |          |         |
| Q9UBL3 | Q9UBL3 | Set1/Ash2 histone methyltransferase complex subunit 2            | ASH2L    | sp Q9UBL3 | 2  | 2 | 2 | 0 | 2 | 0 | 0  | 2 | 0 | 2 | 0 | 0 | 1 | 0   | 1      | 5.6    | 68.722   | 0        | 12.904   | 72429000 | 0        | 61718000 | 0        | 10710000 | 0        | 4286000  | 0        | 1594900  |         |
| O95166 | O95166 | Gamma-aminobutyric acid receptor-associated protein GABARAP      | GABARAP  | sp O95166 | 2  | 2 | 2 | 0 | 1 | 0 | 2  | 0 | 1 | 0 | 2 | 0 | 1 | 0   | 2      | 23.9   | 13.918   | 0        | 5.1555   | 72330000 | 0        | 61428000 | 0        | 66187000 | 0        | 0        | 2722000  | 0        |         |
| Q8TCU6 | Q8TCU6 | Phosphatidylinositol 3,4,5-trisphosphate-dependent protein PIPK1 | PIP1     | sp Q8TCU6 | 5  | 5 | 5 | 0 | 1 | 5 | 0  | 1 | 5 | 0 | 1 | 5 | 0 | 1   | 5      | 3.7    | 186.2    | 0        | 9.1257   | 72325000 | 0        | 0        | 658910   | 71666000 | 0        | 0        | 852280   | 2537800  |         |
| Q9BUR4 | Q9BUR4 | Telomerase Cajal body protein 1                                  | WRAP53   | sp Q9BUR4 | 2  | 2 | 2 | 0 | 1 | 0 | 2  | 0 | 1 | 0 | 2 | 0 | 1 | 0   | 1.7    | 53.309 | 0        | 6.2347   | 72073000 | 0        | 41055000 | 0        | 0        | 0        | 67972000 | 0        | 1371600  | 0        | 1785600 |
| P42696 | P42696 | RNA-binding protein 34                                           | RBM34    | sp P42696 | 4  | 4 | 4 | 0 | 2 | 1 | 4  | 0 | 2 | 1 | 4 | 0 | 2 | 1   | 4      | 2      | 12.3     | 48.564   | 0        | 7.8294   | 72035000 | 0        | 9996500  | 18989000 | 43049000 | 0        | 1469400  | 12541000 | 1402400 |
| O94842 | O94842 | TOX high mobility group box family member 4                      | TOX4     | sp O94842 | 3  | 3 | 1 | 1 | 2 | 1 | 2  | 1 | 2 | 1 | 2 | 0 | 0 | 1   | 6.4    | 66.194 | 0        | 12.384   | 72033000 | 934690   | 29130000 | 1577000  | 40389000 | 1540000  | 1639300  | 1639800  | 1404100  |          |         |
| Q8NSM9 | Q8NSM9 | Protein jagunal homolog 1                                        | JAGN1    | sp Q8NSM9 | 3  | 1 | 1 | 0 | 1 | 1 | 0  | 1 | 1 | 0 | 1 | 1 | 0 | 1   | 6.6    | 21.125 | 0        | 5.1861   | 71983000 | 0        | 30448000 | 1930000  | 39605000 | 0        | 2694400  | 1349200  | 1566600  | 0        |         |
| B9A064 | B9A064 | Immunoglobulin lambda-like polypeptide 5; Ig lam IGLL5; IGLC 5   | IGLL5    | sp B9A064 | 4  | 2 | 2 | 3 | 0 | 3 | 0  | 0 | 2 | 0 | 2 | 0 | 1 | 0   | 26.6   | 23.063 | 0.001145 | 2.6103   | 71964000 | 68274000 | 0        | 3689500  | 0        | 31399000 | 0        | 39355000 | 0        | 0        |         |
| Q8WXD5 | Q8WXD5 | Gem-associated protein 3                                         | GEM3     | sp Q8WXD5 | 3  | 3 | 3 | 1 | 3 | 0 | 3  | 1 | 3 | 0 | 3 | 0 | 1 | 3   | 21.6   | 18.824 | 0        | 4.5074   | 71910000 | 900840   | 31297000 | 0        | 39703000 | 0        | 2658500  | 0        | 1733000  | 0        |         |
| Q9HBL7 | Q9HBL7 | Plasminogen receptor (KT)                                        | PLGRKT   | sp Q9HBL7 | 1  | 1 | 1 | 0 | 0 | 1 | 1  | 0 | 0 | 1 | 0 | 0 | 1 | 1   | 8.8    | 17.201 | 0        | 4.5549   | 71877000 | 0        | 0        | 2722400  | 69154000 | 0        | 0        | 1835300  | 2883100  | 0        |         |
| P08047 | P08047 | Transcription factor SP1                                         | SP1      | sp P08047 | 2  | 2 | 2 | 0 | 2 | 1 | 2  | 0 | 2 | 1 | 2 | 0 | 2 | 1   | 5.5    | 80.692 | 0        | 10.589   | 71856000 | 0        | 25630000 | 3479300  | 42746000 | 0        | 1925400  | 2908700  | 1521200  | 0        |         |
| P18887 | P18887 | DNA repair protein XRCC1                                         | XRCC1    | sp P18887 | 2  | 2 | 2 | 0 | 2 | 0 | 2  | 0 | 2 | 0 | 2 | 0 | 2 | 3.5 | 69.476 | 0      | 6.9196   | 71772000 | 0        | 0        | 18266000 | 0        | 53506000 | 0        | 1673100  | 0        | 2137500  | 0        |         |
| Q9BWQ6 | Q9BWQ6 | Protein YIPF2                                                    | YIPF2    | sp Q9BWQ6 | 1  | 1 | 1 | 0 | 1 | 0 | 1  | 0 | 1 | 0 | 1 | 0 | 1 | 0   | 9.2    | 35.151 | 0        | 9.6654   | 71606000 | 0        | 20180000 | 0        | 0        | 0        | 51426000 | 0        | 1778900  | 0        | 2114900 |
| P58107 | P58107 | Epiplakin                                                        | EPK1     | sp P58107 | 8  | 1 | 1 | 1 | 2 | 8 | 7  | 0 | 1 | 1 | 1 | 1 | 1 | 1   | 9      | 555.65 | 0.001149 | 2.6469   | 71557000 | 0        | 26635000 | 13615000 | 31307000 | 0        | 0        | 0        | 1287500  | 0        |         |
| Q9NZJ7 | Q9NZJ7 | Mitochondrial carrier homolog 1                                  | MTC1     | sp Q9NZJ7 | 1  | 1 | 1 | 0 | 1 | 1 | 1  | 0 | 1 | 1 | 0 | 1 | 1 | 1   | 2.8    | 41.544 | 0.000489 | 5.3582   | 71462000 | 0        | 20022000 | 12610000 | 50179000 | 0        | 1764900  | 847400   | 2063600  | 0        |         |
| Q16718 | Q16718 | NADH dehydrogenase [ubiquinone] 1 alpha subunit NDUFAS1          | NDUFAS1  | sp Q16718 | 1  | 1 | 1 | 0 | 1 | 0 | 1  | 0 | 1 | 0 | 1 | 0 | 1 | 0   | 8.6    | 13.459 | 0.000716 | 3.2665   | 71298000 | 0        | 29023000 | 0        | 42726000 | 0        | 2558300  | 0        | 1738600  | 0        |         |
| Q04726 | Q04726 | Transducin-like enhancer protein 3; Transducin-like TLE3; TLE2   | TLE3     | sp Q04726 | 3  | 3 | 3 | 0 | 2 | 0 | 2  | 0 | 2 | 0 | 2 | 0 | 2 | 0   | 2      | 4.8    | 83.416   | 0        | 7.1424   | 71289000 | 0        | 48136000 | 0        | 23153000 | 0        | 4192800  | 0        | 1002500  | 0       |
| P04114 | P04114 | Apolipoprotein B-100; Apolipoprotein B-48                        | APOB     | sp P04114 | 3  | 2 | 2 | 1 | 1 | 0 | 2  | 1 | 1 | 0 | 1 | 1 | 0 | 1   | 0.7    | 515.6  | 0.001142 | 2.5774   | 71280000 | 55305    | 35959000 | 0        | 35266000 | 55305    | 0        | 0        | 1450300  | 0        |         |
| Q5VTL8 | Q5VTL8 | Pre-mRNA-splicing factor 3BB                                     | PRPF3BB  | sp Q5VTL8 | 2  | 2 | 2 | 0 | 2 | 1 | 2  | 0 | 2 | 1 | 2 | 0 | 1 | 2   | 3.7    | 64.467 | 0        | 4.5011   | 71214000 | 24317000 | 28864000 | 25701000 | 37348000 | 25183000 | 2955500  | 1654200  | 1471100  | 0        |         |
| P04150 | P04150 | Glucocorticoid receptor                                          | NR3C1    | sp P04150 | 4  | 4 | 4 | 0 | 4 | 1 | 4  | 0 | 1 | 4 | 0 | 1 | 4 | 7.7 | 85.658 | 0      | 7.1424   | 71182000 | 26393000 | 0        | 2587600  | 44531000 | 24745000 | 0        | 2139500  | 1513500  | 0        | 0        |         |
| Q8T861 | Q8T861 | Adenosine 3-phospho 5-phosphosulfate transport SLC35B2           | SLC35B2  | sp Q8T861 | 4  | 4 | 4 | 0 | 2 | 3 | 4  | 0 | 2 | 3 | 4 | 0 | 2 | 4   | 8.3    | 47.514 | 0        | 4.6135   | 71155000 | 0        | 50195000 | 3191300  | 62944000 | 0        | 0        | 1196400  | 1706600  | 2272600  | 0       |
| Q55WX8 | Q55WX8 | Protein odr-4 homolog                                            | ODR4     | sp Q55WX8 | 2  | 2 | 2 | 0 | 2 | 0 | 2  | 0 | 2 | 0 | 2 | 0 | 2 | 4   | 4.6    | 51.103 | 0.000248 | 3.7045   | 71048000 | 0        | 17716000 | 0        | 0        | 0        | 53332000 | 0        | 11571000 | 0        | 2183900 |
| P56377 | P56377 | AP-1 complex subunit sigma-2                                     | AP1S2    | sp P56377 | 2  | 2 | 2 | 0 | 2 | 0 | 2  | 0 | 2 | 0 | 2 | 0 | 2 | 0   | 2      | 15.9   | 18.615   | 0        | 7.2883   | 71026000 | 0        | 35992000 | 0        | 35034000 | 0        | 3068200  | 0        | 1543700  | 0       |
| Q9Y2H6 | Q9Y2H6 | Fibronectin type-III domain-containing protein 3A FNDC3A         | FNDC3A   | sp Q9Y2H6 | 3  | 3 | 3 | 0 | 1 | 0 | 3  | 0 | 1 | 0 | 3 | 0 | 1 | 0   | 3      | 4.5    | 13.85    | 0        | 12.866   | 70833000 | 0        | 34828000 | 0        | 6750000  | 0        | 1622300  | 0        | 1454600  | 0       |
| P13498 | P13498 | Cytochrome b-245 light chain                                     | CYBA     | sp P13498 | 2  | 2 | 2 | 0 | 2 | 1 | 2  | 0 | 2 | 1 | 2 | 0 | 2 | 1   | 2      | 8.7    | 21.012   | 0.001146 | 2.6194   | 70693000 | 0        | 25377000 | 759010   | 44557000 | 0        | 1579400  | 1294800  | 1705200  | 0       |
| Q8N111 | Q8N111 | Cell cycle exit and neuronal differentiation protein CEN01       | CEN01    | sp Q8N111 | 2  | 2 | 2 | 0 | 2 | 0 | 2  | 0 | 2 | 0 | 2 | 0 | 2 | 0   | 28.2   | 14.954 | 0        | 5.2047   | 70660000 | 0        | 0        | 0        | 70660000 | 0        | 0        | 0        | 2900000  | 0        |         |
| P49840 | P49840 | Glycogen synthase kinase-3 alpha                                 | GSK3A    | sp P49840 | 2  | 2 | 2 | 0 | 0 | 3 | 0  | 0 | 2 | 0 | 2 | 0 | 0 | 2   | 8.5    | 50.98  | 0        | 6.2315   | 70408000 | 0        | 28930000 | 0        | 41477000 | 0        | 2483000  | 0        | 1773000  | 0        |         |
| Q9NPJ3 | Q9NPJ3 | Acyl-coenzyme A thioesterase 13; Acyl-coenzyme A                 | ACOT13   | sp Q9NPJ3 | 1  | 1 | 1 | 0 | 1 | 0 | 1  | 0 | 1 | 0 | 1 | 0 | 1 | 0   | 7.1    | 14.96  | 0.001129 | 2.4313   | 70371000 | 0        | 33938000 | 0        | 36433000 | 0        | 2991600  | 0        | 1498300  | 0        | 0       |
| Q9Y486 | Q9Y486 | Protein VPRBP                                                    | VPRBP    | sp Q9Y486 | 3  | 3 | 3 | 0 | 2 | 0 | 2  | 0 | 2 | 0 | 2 | 0 | 2 | 0   | 2      | 3.9    | 169.01   | 0        | 5.9377   | 70309000 | 0        | 28207000 | 0        | 47502000 | 0        | 0        | 0        | 1953600  | 0       |
| Q8NB16 | Q8NB16 | Mixed lineage kinase domain-like protein                         | MLKL     | sp Q8NB16 | 2  | 2 | 2 | 0 | 1 | 1 | 2  | 0 | 1 | 1 | 2 | 0 | 1 | 1   | 2      | 6.8    | 54.478   | 0        | 14.835   | 69997000 | 0        | 18833000 | 669110   | 50964000 | 0        | 2472600  | 686830   | 1004900  | 0       |
| Q8WUY1 | Q8WUY1 | Protein THEM6                                                    | THEM6    | sp Q8WUY1 | 3  | 3 | 3 | 0 | 3 | 1 | 2  | 0 | 3 | 1 | 2 | 0 | 3 | 1   | 2      | 17.3   | 23.865   | 0        | 7.6341   | 69957000 | 0        | 51165000 | 1064500  | 17728000 | 0        | 4149900  | 948710   | 8552900  | 0       |
| Q9UBD5 | Q9UBD5 | Origin recognition complex subunit 3                             | ORC3     | sp Q9UBD5 | 2  | 2 | 2 | 0 | 2 | 1 | 2  | 0 | 2 | 1 | 2 | 0 | 2 | 3   | 8.2    | 82.253 | 0        | 7.8485   | 69871000 | 0        | 10467000 | 1403400  | 58000000 | 0        | 828030   | 1291100  | 2129000  | 0        |         |
| Q99996 | Q99996 | A-kinase anchor protein 9                                        | AKAP9    | sp Q99996 | 8  | 8 | 8 | 0 | 6 | 0 | 8  | 0 | 6 | 0 | 8 | 0 | 6 | 0   | 8      | 2.4    | 452.98   | 0        | 11.739   | 69838000 | 0        | 17806000 | 0        | 52031000 | 0        | 2067900  | 0        | 1641600  | 0       |
| O15075 | O15075 | Serine/threonine-protein kinase DCLK1                            | DCLK1    | sp O15075 | 2  | 2 | 2 | 0 | 2 | 0 | 2  | 0 | 2 | 0 | 2 | 0 | 2 | 0   | 5.8    | 82.223 | 0        | 5.3286   | 69822000 | 0        | 0        | 0        | 69822000 | 0        | 0        | 0        | 2871500  | 0        |         |
| P16402 | P16402 | Histone H3.3                                                     | HIST1H3D | sp P16402 | 9  | 2 | 2 | 3 | 8 | 7 | 9  | 0 | 1 | 2 | 0 | 1 | 2 | 0   | 2      | 30.8   | 22.735   | 0        | 4.6878   | 69773000 | 0        | 5429000  | 118910   | 64229000 | 0        | 2502200  | 331420   | 366290   | 0       |
| Q9BVQ7 | Q9BVQ7 | Spermatoogenesis-associated protein 5-like protein 5; SPAT5L1    | SPAT5L1  | sp Q9BVQ7 | 3  | 3 | 3 | 1 | 3 | 1 | 2  | 1 | 3 | 1 | 2 | 1 | 3 | 1   | 2      | 7.3    | 80.709   | 0        | 11.659   | 69673000 | 102970   | 69673000 | 1585500  | 33433000 | 354110   | 785100   | 2988900  | 994690   | 0       |
| Q75419 | Q75419 | Cell division control protein 45 homolog                         | CDK45    | sp Q75419 | 3  | 3 | 3 | 0 | 3 | 0 | 3  | 0 | 3 | 0 | 3 | 0 | 3 | 0   | 2      | 8.3    | 65.568   | 0        | 9.365    | 69633000 | 0        | 6020     |          |          |          |          |          |          |         |



|          |        |                                                                 |          |         |   |   |   |   |   |   |   |   |   |   |   |   |   |   |      |        |        |          |          |            |          |          |          |          |          |          |         |          |         |
|----------|--------|-----------------------------------------------------------------|----------|---------|---|---|---|---|---|---|---|---|---|---|---|---|---|---|------|--------|--------|----------|----------|------------|----------|----------|----------|----------|----------|----------|---------|----------|---------|
| Q68CQ7   | Q68CQ7 | Glycosyltransferase 8 domain-containing protein                 | GLT8D1   | Q1068CQ | 3 | 3 | 3 | 0 | 1 | 0 | 3 | 0 | 1 | 0 | 3 | 0 | 1 | 0 | 3    | 10.8   | 41.935 | 0        | 10.226   | 65621000   | 0        | 6313900  | 0        | 59307000 | 0        | 0        | 0       | 2439100  |         |
| Q9Y3R5   | Q9Y3R5 | Protein dopey-2                                                 | DOPEY2   | Q109Y3R | 3 | 3 | 3 | 0 | 2 | 0 | 3 | 0 | 2 | 0 | 3 | 0 | 2 | 0 | 3    | 1.4    | 258.23 | 0        | 10.196   | 65598000   | 0        | 52782000 | 0        | 52886000 | 0        | 0        | 0       | 2052700  |         |
| Q86TP1   | Q86TP1 | Protein prune homolog                                           | PRUNE    | Q1086TP | 4 | 4 | 4 | 0 | 4 | 0 | 1 | 0 | 4 | 0 | 1 | 0 | 4 | 0 | 1    | 11.9   | 50.199 | 0        | 42.266   | 65360000   | 0        | 15812000 | 0        | 6778100  | 0        | 0        | 0       | 6672300  |         |
| P15291   | P15291 | Beta-1,4-galactosyltransferase 1:Lactose synthase               | B4GALT1  | Q1P1529 | 1 | 1 | 1 | 0 | 0 | 0 | 1 | 0 | 0 | 0 | 1 | 0 | 0 | 0 | 1    | 5      | 43.92  | 0        | 9.398    | 65290000   | 0        | 0        | 0        | 65290000 | 0        | 0        | 0       | 2685100  |         |
| Q9P013   | Q9P013 | Spliceosome-associated protein CWC15 homolog                    | CWC15    | Q109P01 | 2 | 2 | 2 | 0 | 2 | 0 | 1 | 0 | 2 | 0 | 1 | 0 | 2 | 0 | 1    | 15.7   | 26.624 | 0        | 5.4814   | 65233000   | 0        | 50178000 | 0        | 15055000 | 0        | 0        | 0       | 18589700 |         |
| Q13546   | Q13546 | Receptor-interacting serine/threonine-protein kinase R1PK1      | R1PK1    | Q113546 | 4 | 4 | 4 | 0 | 4 | 0 | 4 | 0 | 4 | 0 | 4 | 0 | 4 | 0 | 2    | 7.6    | 75.93  | 0        | 8.0752   | 65181000   | 0        | 40089000 | 0        | 25092000 | 0        | 0        | 0       | 2123600  |         |
| P29317   | P29317 | Ephrin type-A receptor 2                                        | EPHA2    | Q102931 | 4 | 4 | 4 | 0 | 4 | 0 | 4 | 0 | 4 | 0 | 4 | 0 | 4 | 0 | 4    | 5      | 108.27 | 0        | 8.672    | 65029000   | 0        | 0        | 0        | 65029000 | 0        | 0        | 0       | 2674400  |         |
| P52735   | P52735 | Guanine nucleotide exchange factor VAV2                         | VAV2     | Q105273 | 3 | 3 | 3 | 0 | 2 | 0 | 3 | 0 | 2 | 0 | 3 | 0 | 2 | 0 | 3    | 5.4    | 101.29 | 0        | 11.255   | 64982000   | 0        | 10984000 | 0        | 53998000 | 0        | 0        | 0       | 1437000  |         |
| Q92845   | Q92845 | Kinesin-associated protein 3                                    | KIFAP3   | Q109284 | 1 | 1 | 1 | 0 | 1 | 0 | 1 | 0 | 1 | 0 | 1 | 0 | 1 | 0 | 1    | 2.5    | 91.204 | 0        | 12.411   | 64979000   | 0        | 2904200  | 0        | 62075000 | 0        | 0        | 0       | 438700   |         |
| Q96973   | Q96973 | Sorting nexin-21                                                | SNX21    | Q109697 | 3 | 3 | 3 | 0 | 1 | 3 | 0 | 0 | 1 | 3 | 0 | 0 | 1 | 3 | 16.1 | 41.365 | 0      | 9.6346   | 64899000 | 0          | 0        | 0        | 63856000 | 0        | 0        | 0        | 2380300 |          |         |
| Q8273    | Q8273  | RNA pseudouridylylase synthase domain-containing protein PUS2D2 | PUS2D2   | Q108273 | 2 | 2 | 2 | 0 | 2 | 0 | 2 | 0 | 2 | 0 | 2 | 0 | 2 | 0 | 2    | 4.6    | 61.311 | 0        | 6.6737   | 64827000   | 0        | 19085000 | 0        | 13755000 | 0        | 0        | 0       | 16785000 |         |
| Q15052   | Q15052 | Rho guanine nucleotide exchange factor 6                        | ARHGEF6  | Q115052 | 2 | 2 | 2 | 0 | 2 | 0 | 1 | 0 | 2 | 0 | 1 | 0 | 2 | 0 | 2    | 8.4    | 87.498 | 0        | 4.7199   | 64811000   | 0        | 4010800  | 0        | 4010800  | 0        | 0        | 0       | 2403100  |         |
| Q9UJ41   | Q9UJ41 | Rab5 GDP/GTP exchange factor                                    | RABGEF1  | Q109UJ4 | 4 | 4 | 4 | 0 | 4 | 0 | 3 | 0 | 4 | 0 | 3 | 0 | 4 | 0 | 3    | 11.8   | 56.89  | 0        | 10.408   | 64695000   | 0        | 17819000 | 0        | 46876000 | 0        | 0        | 0       | 2039300  |         |
| Q6NUM9   | Q6NUM9 | All-trans-retinol 13,14-reductase                               | RETSA1   | Q106NUM | 1 | 1 | 1 | 0 | 0 | 0 | 1 | 0 | 0 | 0 | 1 | 0 | 0 | 0 | 1    | 2      | 66.819 | 0.000488 | 3.5135   | 64656000   | 0        | 0        | 0        | 0        | 0        | 0        | 0       | 2659000  |         |
| P51808   | P51808 | Dynein light chain Tctex-type 3                                 | DYLNLT3  | Q105180 | 1 | 1 | 1 | 0 | 0 | 1 | 0 | 0 | 1 | 0 | 0 | 0 | 1 | 0 | 0    | 29.3   | 13.062 | 0        | 6.3405   | 64319000   | 0        | 0        | 0        | 64319000 | 0        | 0        | 0       | 2645200  |         |
| Q15067   | Q15067 | Peroxisomal acyl-coenzyme A oxidase 1                           | ACOX1    | Q101506 | 4 | 4 | 4 | 0 | 4 | 0 | 1 | 0 | 4 | 0 | 1 | 0 | 4 | 0 | 1    | 9.4    | 74.423 | 0        | 22.395   | 64215000   | 0        | 62141000 | 0        | 2074000  | 0        | 0        | 0       | 4658500  |         |
| Q16566   | Q16566 | Calcium/calmodulin-dependent protein kinase type CAMK4          | CAMK4    | Q116566 | 3 | 3 | 3 | 0 | 1 | 3 | 0 | 1 | 3 | 0 | 1 | 3 | 0 | 1 | 3    | 9.7    | 51.925 | 0        | 9.5085   | 64102000   | 0        | 3188000  | 0        | 2322500  | 0        | 0        | 0       | 652600   |         |
| Q99442   | Q99442 | Translocation protein SEC62                                     | SEC62    | Q109944 | 3 | 3 | 3 | 0 | 1 | 2 | 3 | 0 | 1 | 2 | 3 | 0 | 1 | 2 | 3    | 7      | 45.861 | 0        | 5.1132   | 63872000   | 0        | 5775500  | 0        | 2175000  | 0        | 55381000 | 0       | 0        | 1271600 |
| Q9NRW3   | Q9NRW3 | DNA c->du-editing enzyme APOBEC-3C                              | APOBEC3C | Q109NRW | 2 | 2 | 2 | 0 | 2 | 0 | 2 | 0 | 2 | 0 | 2 | 0 | 2 | 0 | 2    | 16.3   | 22.826 | 0.001169 | 2.9376   | 63858000   | 0        | 6301700  | 0        | 57566000 | 0        | 0        | 0       | 4170100  |         |
| Q9BY29   | Q9BY29 | YTH domain-containing family protein 1                          | YTHDF1   | Q109BY2 | 9 | 9 | 9 | 0 | 1 | 4 | 6 | 1 | 2 | 2 | 2 | 2 | 2 | 2 | 17.5 | 60.873 | 0      | 5.6419   | 63845000 | 2421700    | 15174000 | 0        | 6416600  | 0        | 39833000 | 3043900  | 1906400 | 3411000  | 1348000 |
| Q965Y0   | Q965Y0 | von Willebrand factor A domain-containing protein VWA9          | VWA9     | Q10965Y | 3 | 3 | 3 | 0 | 2 | 0 | 3 | 0 | 2 | 0 | 3 | 0 | 2 | 0 | 3    | 10     | 57.47  | 0        | 10.148   | 63783000   | 0        | 15554000 | 0        | 48228000 | 0        | 0        | 0       | 1420700  |         |
| Q14573;Q | Q14573 | Inositol 1,4,5-trisphosphate receptor type 3                    | ITPR3    | Q114573 | 4 | 4 | 4 | 0 | 4 | 0 | 6 | 0 | 4 | 0 | 2 | 3 | 4 | 0 | 2    | 7      | 304.1  | 0        | 4.5333   | 63540000   | 0        | 14624000 | 0        | 2766900  | 0        | 0        | 0       | 2369100  |         |
| P49069   | P49069 | Calcium signal-modulating cyclophilin ligand                    | CAMLG    | Q104906 | 3 | 3 | 3 | 0 | 3 | 0 | 3 | 0 | 3 | 0 | 3 | 0 | 3 | 0 | 3    | 23.3   | 32.952 | 0        | 12.444   | 63477000   | 0        | 25020000 | 0        | 38457000 | 0        | 0        | 0       | 2309800  |         |
| Q96EC8   | Q96EC8 | Protein YIP6                                                    | YIP6     | Q1096EC | 2 | 2 | 2 | 0 | 2 | 1 | 2 | 0 | 2 | 1 | 2 | 0 | 2 | 1 | 2    | 11.9   | 26.256 | 0        | 6.9974   | 63437000   | 0        | 11926000 | 0        | 2360900  | 0        | 0        | 0       | 931240   |         |
| Q9Y229   | Q9Y229 | Ubiquinone biosynthesis monooxygenase COQ6                      | COQ6     | Q109Y22 | 5 | 5 | 5 | 0 | 5 | 1 | 2 | 0 | 5 | 1 | 2 | 0 | 5 | 1 | 2    | 12.4   | 50.869 | 0        | 9.3709   | 63278000   | 0        | 46072000 | 0        | 1510500  | 0        | 15695000 | 0       | 0        | 3988000 |
| Q9UNX4   | Q9UNX4 | WD repeat-containing protein 3                                  | WDR3     | Q109UNX | 3 | 3 | 3 | 0 | 3 | 0 | 3 | 0 | 3 | 0 | 3 | 0 | 3 | 0 | 3    | 4      | 106.11 | 0        | 11.568   | 63250000   | 0        | 29988000 | 0        | 33263000 | 0        | 0        | 0       | 2724100  |         |
| Q96G99   | Q96G99 | Methylthioauribiose-1-phosphate dehydratase                     | ADP      | Q1096G9 | 2 | 2 | 2 | 0 | 2 | 0 | 1 | 0 | 2 | 0 | 1 | 0 | 2 | 0 | 1    | 9.1    | 27.125 | 0        | 5.296    | 63180000   | 0        | 32391000 | 0        | 63789000 | 0        | 0        | 0       | 2352800  |         |
| Q8TR09   | Q8TR09 | Protein kish-A                                                  | TMEM167  | Q108TR0 | 1 | 1 | 1 | 0 | 1 | 0 | 1 | 0 | 1 | 0 | 1 | 0 | 1 | 0 | 1    | 12.5   | 8.0598 | 0.003484 | 1.9777   | 63044000   | 0        | 17808000 | 0        | 45236000 | 0        | 0        | 0       | 1565700  |         |
| Q8TRV0   | Q8TRV0 | PHD finger-like domain-containing protein 5A                    | PHF5A    | Q108TRV | 2 | 2 | 2 | 0 | 2 | 1 | 2 | 0 | 2 | 1 | 2 | 0 | 2 | 1 | 2    | 15.5   | 12.405 | 0        | 4.2142   | 62919000   | 0        | 34972000 | 0        | 1723700  | 0        | 0        | 0       | 26224000 |         |
| Q8Y37    | Q8Y37  | Probable ATP-dependent RNA helicase DHX37                       | DHX37    | Q108Y37 | 3 | 3 | 3 | 0 | 2 | 1 | 3 | 0 | 2 | 1 | 3 | 0 | 2 | 1 | 3    | 4      | 125.54 | 0        | 6.6329   | 62890000   | 0        | 30697000 | 0        | 2189500  | 0        | 30004000 | 0       | 0        | 736230  |
| Q726M1   | Q726M1 | Rab9 effector protein with kelch motifs                         | RABEPK   | Q10726M | 4 | 4 | 4 | 0 | 3 | 0 | 3 | 0 | 3 | 0 | 3 | 0 | 3 | 0 | 3    | 19.1   | 40.564 | 0        | 6.5261   | 62886000   | 0        | 30149000 | 0        | 32737000 | 0        | 0        | 0       | 2806700  |         |
| Q9BV79   | Q9BV79 | Trans-2-enoyl-CoA reductase, mitochondrial                      | MCCR     | Q109BV7 | 2 | 2 | 2 | 0 | 2 | 0 | 2 | 0 | 2 | 0 | 2 | 0 | 2 | 0 | 2    | 5.6    | 40.461 | 0        | 4.5639   | 62878000   | 0        | 19597000 | 0        | 43281000 | 0        | 0        | 0       | 1922100  |         |
| Q9BPY3   | Q9BPY3 | Protein FAM118B                                                 | FAM118B  | Q109BPY | 2 | 2 | 2 | 0 | 2 | 0 | 0 | 2 | 0 | 2 | 0 | 0 | 2 | 0 | 0    | 8      | 39.499 | 0        | 7.7007   | 62845000   | 0        | 62845000 | 0        | 0        | 0        | 0        | 0       | 5539700  |         |
| Q75152   | Q75152 | Zinc finger CCH domain-containing protein 11A                   | ZC3H11A  | Q107515 | 5 | 5 | 5 | 0 | 4 | 2 | 5 | 0 | 4 | 2 | 5 | 0 | 4 | 2 | 10.5 | 89.13  | 0      | 8.5671   | 62657000 | 6302900    | 50295000 | 0        | 6059100  | 0        | 0        | 0        | 0       | 4186600  |         |
| Q6VMQ6   | Q6VMQ6 | Activating transcription factor 7-interacting protein ATF7IP    | ATF7IP   | Q106VMQ | 3 | 3 | 3 | 0 | 1 | 3 | 0 | 1 | 3 | 0 | 1 | 3 | 0 | 1 | 3    | 4.8    | 136.39 | 0        | 5.2048   | 62654000   | 0        | 9398900  | 0        | 4415400  | 0        | 48840000 | 0       | 0        | 1056900 |
| Q9UHQ4   | Q9UHQ4 | B-cell receptor-associated protein 29                           | BCAP29   | Q109UHQ | 2 | 2 | 2 | 0 | 1 | 1 | 2 | 0 | 1 | 1 | 2 | 0 | 1 | 1 | 2    | 10     | 28.32  | 0        | 6.9714   | 62420000   | 0        | 2605000  | 0        | 935000   | 0        | 58880000 | 0       | 0        | 559940  |
| Q95379   | Q95379 | Tumor necrosis factor alpha-induced protein 8                   | TNFAIP8  | Q109537 | 2 | 2 | 2 | 0 | 1 | 0 | 2 | 0 | 1 | 0 | 2 | 0 | 1 | 0 | 2    | 17.2   | 23.003 | 0        | 15.828   | 62230000   | 0        | 3305600  | 0        | 58925000 | 0        | 0        | 0       | 388970   |         |
| Q75691   | Q75691 | Small subunit processome component 20 homolog UTP20             | UTP20    | Q107569 | 5 | 5 | 5 | 0 | 1 | 3 | 5 | 0 | 1 | 3 | 5 | 0 | 1 | 3 | 5    | 2.6    | 318.38 | 0        | 6.6831   | 62189000   | 0        | 2229200  | 0        | 4562600  | 0        | 0        | 0       | 53937000 |         |
| Q7LGA3   | Q7LGA3 | Heparan sulfate 2-O-sulfotransferase 1                          | HS2T1    | Q107LGA | 3 | 3 | 3 | 0 | 3 | 1 | 3 | 0 | 3 | 1 | 3 | 0 | 3 | 1 | 12.9 | 41.881 | 0      | 6.9986   | 61930000 | 0          | 46765000 | 0        | 2094500  | 0        | 13070000 | 0        | 0       | 3350400  |         |
| Q9H900   | Q9H900 | Protein zwilch homolog                                          | ZWLICH   | Q109H90 | 2 | 2 | 2 | 0 | 2 | 0 | 2 | 0 | 2 | 0 | 2 | 0 | 2 | 0 | 2    | 3.9    | 67.213 | 0        | 3.9908   | 61880000   | 0        | 24524000 | 0        | 37356000 | 0        | 0        | 0       | 2337600  |         |
| Q9C035   | Q9C035 | Tripartite motif-containing protein 5                           | TRIM5    | Q109C03 | 2 | 2 | 2 | 0 | 1 | 0 | 2 | 0 | 1 | 0 | 2 | 0 | 1 | 0 | 2    | 6.5    | 56.338 | 0        | 18.583   | 61801000   | 0        | 18590000 | 0        | 43211000 | 0        | 0        | 0       | 1677800  |         |
| P61421   | P61421 | V-type proton ATPase subunit d 1                                | ATP6V0D1 | Q106142 | 1 | 1 | 1 | 0 | 1 | 1 | 1 | 0 | 1 | 1 | 1 | 0 | 1 | 1 | 1    | 3.1    | 40.329 | 0.00474  | 1.8148   | 61538000   | 0        | 9205500  | 0        | 1643100  | 0        | 0        | 0       | 50689000 |         |
| Q15066;Q | Q15066 | Kinesin-like protein NIF3B;kinesin-like protein KIF3B           | KIF3B    | Q101506 | 6 | 5 | 5 | 0 | 2 | 1 | 6 | 0 | 1 | 1 | 5 | 0 | 1 | 1 | 5    | 10.8   | 85.124 | 0        | 6.6774   | 61433000   | 0        | 1657700  | 0        | 703530   | 0        | 5902000  | 0       | 0        | 579760  |
| P19447   | P19447 | TFIIH basal transcription factor complex helicase 1 ERCC3       | ERCC3    | Q101944 | 3 | 3 | 3 | 0 | 3 | 2 | 3 | 0 | 3 | 2 | 3 | 0 | 3 | 2 | 7.9  | 89.277 | 0      | 44.276   | 61413000 | 0          | 38560000 | 0        | 3471500  | 0        | 19440000 | 0        | 0       | 1724000  |         |
| Q70C02   | Q70C02 | Ubiquitin carboxyl-terminal hydrolase 34                        | USP34    | Q1070C0 | 2 | 2 | 2 | 0 | 2 | 0 | 1 | 0 | 2 | 0 | 1 | 0 | 2 | 0 | 2    | 0.7    | 404.23 | 0        | 3.922    | 61413000   | 0        | 18792000 | 0        | 1106200  | 0        | 0        | 0       | 41515000 |         |
| Q53R73   | Q53R73 | Retroviral-like aspartic protease 1                             | ASPRV1   | Q1053R7 | 2 | 2 | 2 | 0 | 2 | 0 | 2 | 0 | 2 | 0 | 2 | 0 | 2 | 0 | 2    | 13.1   | 36.991 | 0        | 44.377   | 61342000</ |          |          |          |          |          |          |         |          |         |

|        |        |                                                   |          |           |   |   |   |   |   |   |   |   |   |   |     |        |          |          |          |          |          |          |          |          |          |          |          |         |         |         |
|--------|--------|---------------------------------------------------|----------|-----------|---|---|---|---|---|---|---|---|---|---|-----|--------|----------|----------|----------|----------|----------|----------|----------|----------|----------|----------|----------|---------|---------|---------|
| Q92667 | Q92667 | A-kinase anchor protein 1, mitochondrial          | AKAP1    | sp Q92667 | 6 | 6 | 6 | 0 | 6 | 0 | 1 | 0 | 6 | 0 | 1   | 11.6   | 97.34    | 0        | 9.0885   | 58215000 | 0        | 45202000 | 0        | 13012000 | 0        | 3984500  | 0        | 535140  |         |         |
| O75391 | O75391 | Sperm-associated antigen 7                        | SPAG7    | sp O75391 | 3 | 3 | 3 | 0 | 3 | 0 | 0 | 0 | 3 | 0 | 0   | 19.8   | 26.034   | 0        | 9.9929   | 58208000 | 0        | 58208000 | 0        | 0        | 0        | 5131000  | 0        | 0       |         |         |
| Q9Y4K3 | Q9Y4K3 | TNF receptor-associated factor 6                  | TRAF6    | sp Q9Y4K3 | 4 | 4 | 4 | 0 | 2 | 0 | 0 | 0 | 2 | 0 | 4   | 10.9   | 59.573   | 0        | 9.4981   | 58195000 | 0        | 5746400  | 0        | 52449000 | 0        | 3137700  | 0        | 1345800 |         |         |
| Q8IVM0 | Q8IVM0 | Coiled-coil domain-containing protein 50          | CDC50    | sp Q8IVM0 | 4 | 4 | 4 | 0 | 0 | 4 | 0 | 1 | 0 | 4 | 0   | 4      | 22.9     | 35.822   | 0        | 21.942   | 58085000 | 0        | 2457900  | 0        | 55627000 | 0        | 0        | 0       | 2287700 |         |
| O60341 | O60341 | Lysine-specific histone demethylase 1A            | KDM1A    | sp O60341 | 5 | 5 | 5 | 1 | 4 | 0 | 3 | 1 | 4 | 0 | 3   | 9.5    | 92.902   | 0        | 9.5167   | 58035000 | 251520   | 24033000 | 0        | 33750000 | 586140   | 2073400  | 0        | 1098500 |         |         |
| Q9UKZ1 | Q9UKZ1 | CCR4-NOT transcription complex subunit 11         | CNOT11   | sp Q9UKZ1 | 2 | 2 | 2 | 0 | 1 | 0 | 2 | 0 | 1 | 0 | 2   | 6.3    | 55.215   | 0        | 5.7024   | 58026000 | 0        | 14435000 | 0        | 43590000 | 0        | 1427000  | 0        | 1638200 |         |         |
| Q14728 | Q14728 | Major facilitator superfamily domain-containing 1 | MFS101   | sp Q14728 | 1 | 1 | 1 | 0 | 1 | 1 | 1 | 1 | 1 | 1 | 1   | 2.9    | 48.339   | 0        | 3.8513   | 57950000 | 0        | 8698000  | 0        | 47791000 | 0        | 766720   | 982350   | 1965400 |         |         |
| Q92791 | Q92791 | Synaptonemal complex protein SC65                 | LEPRL4   | sp Q92791 | 2 | 2 | 2 | 0 | 0 | 2 | 0 | 0 | 2 | 0 | 2   | 5      | 50.381   | 0.000487 | 3.4825   | 57913000 | 0        | 5454000  | 0        | 52459000 | 0        | 0        | 0        | 2157400 |         |         |
| Q13823 | Q13823 | Nucleolar GTP-binding protein 2                   | GNL2     | sp Q13823 | 3 | 3 | 3 | 0 | 2 | 2 | 1 | 0 | 2 | 2 | 1   | 5.6    | 83.654   | 0        | 6.7372   | 57876000 | 0        | 40975000 | 4147900  | 12753000 | 0        | 3611900  | 0        | 0       |         |         |
| Q15369 | Q15369 | Transcription elongation factor B polypeptide 1   | TCF81    | sp Q15369 | 1 | 1 | 1 | 0 | 1 | 0 | 1 | 0 | 1 | 0 | 1   | 17.9   | 12.473   | 0        | 11.223   | 57770000 | 0        | 13640000 | 0        | 44137000 | 0        | 0        | 0        | 1815200 |         |         |
| Q62852 | Q62852 | Helicase SRCAP                                    | SRCAP    | sp Q62852 | 2 | 2 | 2 | 0 | 2 | 0 | 1 | 0 | 2 | 0 | 1   | 0.6    | 348.55   | 0.001571 | 2.235    | 57692000 | 0        | 50336000 | 0        | 7366000  | 0        | 32961000 | 0        | 2443000 |         |         |
| Q96D02 | Q96D02 | U8 snRNP-decapping enzyme                         | NUDT16   | sp Q96D02 | 3 | 3 | 3 | 0 | 3 | 0 | 3 | 0 | 3 | 0 | 3   | 22.6   | 21.273   | 0        | 11.077   | 57519000 | 0        | 13651000 | 0        | 43888000 | 0        | 0        | 0        | 1788400 |         |         |
| Q9NZ52 | Q9NZ52 | ADP-ribosylation factor-binding protein GGA3      | GGA3     | sp Q9NZ52 | 3 | 3 | 3 | 0 | 2 | 0 | 3 | 0 | 2 | 0 | 3   | 6.4    | 78.314   | 0        | 6.8051   | 57473000 | 0        | 13964000 | 0        | 43509000 | 0        | 1413400  | 0        | 1606900 |         |         |
| P01024 | P01024 | Complement C3 beta chain;C3- $\beta$ C3           | C3       | sp P01024 | 3 | 3 | 3 | 2 | 3 | 1 | 1 | 0 | 2 | 0 | 2   | 2.5    | 187.15   | 0.000716 | 3.2712   | 57438000 | 40429000 | 0        | 17009000 | 0        | 43098000 | 0        | 8760800  | 0       | 0       |         |
| P23508 | P23508 | Colorectal mutant cancer protein                  | MCC      | sp P23508 | 3 | 3 | 3 | 0 | 2 | 3 | 0 | 0 | 2 | 3 | 6.8 | 93.026 | 0        | 9.6303   | 57362000 | 0        | 0        | 0        | 2910300  | 54451000 | 0        | 0        | 0        | 2173600 | 2021500 |         |
| Q86WR0 | Q86WR0 | Coiled-coil domain-containing protein 25          | CDC25    | sp Q86WR0 | 2 | 2 | 2 | 0 | 2 | 0 | 2 | 0 | 2 | 0 | 2   | 11.1   | 24.479   | 0.000945 | 3.0874   | 56916000 | 0        | 18451000 | 0        | 38465000 | 0        | 1486300  | 0        | 1722000 |         |         |
| Q723C6 | Q723C6 | Autophagy-related protein 9A                      | ATG9A    | sp Q723C6 | 3 | 3 | 3 | 3 | 1 | 2 | 0 | 3 | 1 | 2 | 6.2 | 94.446 | 0.000248 | 3.7294   | 56892000 | 0        | 26567000 | 2199500  | 28125000 | 0        | 1519700  | 2154300  | 1302600  | 0       |         |         |
| P06400 | P06400 | Retinoblastoma-associated protein                 | RB1      | sp P06400 | 3 | 3 | 3 | 0 | 1 | 0 | 3 | 0 | 1 | 0 | 3   | 5.8    | 106.16   | 0        | 18.504   | 56848000 | 0        | 5277200  | 0        | 51571000 | 0        | 831550   | 0        | 95600   |         |         |
| Q9NWU1 | Q9NWU1 | 3-oxoacyl-[acyl-carrier-protein] synthase, mitoch | OXS1     | sp Q9NWU1 | 3 | 3 | 3 | 0 | 3 | 0 | 1 | 0 | 3 | 0 | 1   | 13.1   | 48.842   | 0        | 13.05    | 56836000 | 0        | 49976000 | 0        | 6868000  | 0        | 3731400  | 0        | 95600   |         |         |
| Q9NW50 | Q9NW50 | PIH1 domain-containing protein 1                  | PIH1D1   | sp Q9NW50 | 2 | 2 | 2 | 0 | 0 | 2 | 0 | 0 | 2 | 0 | 2   | 10     | 32.363   | 0        | 5.2601   | 56769000 | 0        | 10192000 | 0        | 46577000 | 0        | 0        | 0        | 1915500 |         |         |
| Q7L5L3 | Q7L5L3 | Glycerophosphodiester phosphodiesterase doma      | GDPD3    | sp Q7L5L3 | 1 | 1 | 1 | 0 | 0 | 1 | 1 | 0 | 1 | 0 | 1   | 4.4    | 36.596   | 0        | 4.3399   | 56581000 | 0        | 0        | 9251400  | 47329000 | 0        | 0        | 6216900  | 1946400 | 0       |         |
| P58546 | P58546 | Myotropin                                         | MTPN     | sp P58546 | 1 | 1 | 1 | 0 | 1 | 0 | 1 | 0 | 1 | 0 | 1   | 14.4   | 12.895   | 0        | 38.323   | 56507000 | 0        | 23455000 | 0        | 33052000 | 0        | 2067500  | 0        | 1359300 |         |         |
| P15104 | P15104 | Glutamine synthetase                              | GLUL     | sp P15104 | 3 | 3 | 3 | 0 | 3 | 0 | 0 | 0 | 3 | 0 | 0   | 16.6   | 42.064   | 0        | 10.217   | 56467000 | 0        | 56467000 | 0        | 0        | 0        | 4977500  | 0        | 0       |         |         |
| Q95684 | Q95684 | FGFR1 oncogene partner                            | FGFR10P  | sp Q95684 | 2 | 2 | 2 | 0 | 0 | 2 | 0 | 0 | 2 | 0 | 2   | 11.3   | 43.064   | 0        | 11.146   | 56345000 | 0        | 10660000 | 0        | 10660000 | 0        | 45745000 | 0        | 1078900 | 0       | 1736800 |
| O95149 | O95149 | Snurportin-1                                      | SNUPN    | sp O95149 | 1 | 1 | 1 | 0 | 1 | 0 | 1 | 0 | 1 | 0 | 1   | 7.5    | 41.142   | 0        | 35.561   | 56333000 | 0        | 8297600  | 0        | 48035000 | 0        | 731430   | 0        | 1975500 |         |         |
| P47712 | P47712 | Cytosolic phospholipase A2;Phospholipase A2;Lys   | PLA2G4A  | sp P47712 | 3 | 3 | 3 | 0 | 0 | 0 | 3 | 0 | 0 | 0 | 3   | 7.1    | 85.238   | 0        | 13.199   | 56287000 | 0        | 0        | 0        | 56287000 | 0        | 0        | 0        | 2314800 |         |         |
| O95807 | O95807 | Transmembrane protein 50A                         | TMEM50A  | sp O95807 | 1 | 1 | 1 | 0 | 1 | 0 | 1 | 0 | 1 | 0 | 1   | 5.1    | 17.4     | 0.000484 | 3.4245   | 56251000 | 0        | 8802100  | 0        | 57449000 | 0        | 775900   | 0        | 1951400 |         |         |
| Q15796 | Q15796 | Mothers against decapentaplegic homolog 2         | SMAD2    | sp Q15796 | 2 | 2 | 2 | 0 | 2 | 1 | 1 | 0 | 2 | 0 | 1   | 5.1    | 52.306   | 0        | 4.3059   | 56231000 | 0        | 23655000 | 2517600  | 30058000 | 0        | 2171100  | 1532300  | 1309800 | 0       |         |
| P42785 | P42785 | Lysosomal Pro-X carboxypeptidase                  | PRCP     | sp P42785 | 1 | 1 | 1 | 0 | 1 | 0 | 1 | 0 | 1 | 0 | 1   | 2.4    | 55.799   | 0.008441 | 1.5915   | 56132000 | 0        | 18402000 | 0        | 37213000 | 0        | 0        | 0        | 0       | 1551700 |         |
| P04049 | P04049 | RAF proto-oncogene serine/threonine-protein kin   | RAF1     | sp P04049 | 2 | 2 | 2 | 0 | 2 | 1 | 2 | 0 | 2 | 1 | 2   | 4.9    | 73.051   | 0        | 7.6289   | 56114000 | 0        | 12272000 | 822340   | 46015000 | 0        | 1125800  | 1081100  | 1196700 | 0       |         |
| Q96F85 | Q96F85 | CB1 cannabinoid receptor-interacting protein 1    | CNRI1    | sp Q96F85 | 2 | 2 | 2 | 0 | 1 | 0 | 2 | 0 | 1 | 0 | 2   | 23.2   | 18.648   | 0        | 9.4025   | 56015000 | 0        | 0        | 0        | 56015000 | 0        | 0        | 0        | 0       | 2303600 |         |
| O43677 | O43677 | NADH dehydrogenase [ubiquinone] 1 subunit C1,     | NDUF1    | sp O43677 | 1 | 1 | 1 | 0 | 1 | 0 | 1 | 0 | 0 | 0 | 1   | 10.5   | 8.7341   | 0.003086 | 2.1197   | 55906000 | 0        | 0        | 55906000 | 0        | 0        | 0        | 32565000 | 0       | 0       |         |
| Q8TEY7 | Q8TEY7 | Ubiquitin carboxyl-terminal hydrolase 33          | USP33    | sp Q8TEY7 | 2 | 2 | 2 | 0 | 1 | 1 | 0 | 1 | 1 | 1 | 1   | 4.2    | 106.73   | 0.000952 | 3.2039   | 55870000 | 0        | 16887000 | 27908000 | 11075000 | 0        | 1488600  | 18754000 | 0       | 0       |         |
| Q6NZY4 | Q6NZY4 | Zinc finger CCHC domain-containing protein 8      | ZCCHC8   | sp Q6NZY4 | 5 | 5 | 5 | 0 | 5 | 0 | 0 | 0 | 5 | 0 | 0   | 12.6   | 78.576   | 0        | 10.75    | 55729000 | 0        | 55729000 | 0        | 0        | 0        | 4912400  | 0        | 0       | 0       |         |
| Q8WVC6 | Q8WVC6 | Dephospho-CoA kinase domain-containing protei     | DCAKD    | sp Q8WVC6 | 2 | 2 | 2 | 0 | 2 | 0 | 2 | 0 | 2 | 0 | 2   | 10     | 26.55    | 0        | 4.3392   | 55641000 | 0        | 10153000 | 0        | 45488000 | 0        | 1027700  | 0        | 1558800 |         |         |
| Q9NT15 | Q9NT15 | Sister chromatid cohesion protein PD55 homolog    | PD55B    | sp Q9NT15 | 5 | 4 | 4 | 0 | 5 | 0 | 0 | 0 | 4 | 0 | 1   | 6.2    | 164.67   | 0        | 3.9644   | 55370000 | 0        | 38400000 | 0        | 16696000 | 0        | 3127300  | 0        | 955650  |         |         |
| Q9UI83 | Q9UI83 | 2-hydroxyacyl-CoA lyase 1                         | HACL1    | sp Q9UI83 | 3 | 3 | 3 | 0 | 3 | 1 | 2 | 0 | 3 | 1 | 2   | 5.4    | 63.728   | 0        | 11.299   | 54762000 | 0        | 36965000 | 2718900  | 15078000 | 0        | 2401000  | 1859200  | 1445400 | 0       |         |
| Q12893 | Q12893 | Transmembrane protein 115                         | TMEM115  | sp Q12893 | 1 | 1 | 1 | 0 | 1 | 0 | 1 | 0 | 1 | 0 | 1   | 5.1    | 38.197   | 0.001134 | 2.4823   | 54630000 | 0        | 13064000 | 0        | 41567000 | 0        | 1151500  | 0        | 1709500 |         |         |
| O00592 | O00592 | Podocalyxin                                       | PODXL    | sp O00592 | 2 | 2 | 2 | 0 | 2 | 0 | 1 | 0 | 2 | 0 | 1   | 3.9    | 58.635   | 0        | 4.478    | 54522000 | 0        | 42752000 | 0        | 11770000 | 0        | 3768600  | 0        | 0       | 0       |         |
| O15013 | O15013 | Rho guanine nucleotide exchange factor 10         | ARHGEF10 | sp O15013 | 2 | 2 | 2 | 0 | 0 | 0 | 0 | 0 | 0 | 0 | 4   | 6.7    | 151.61   | 0        | 16.176   | 54459000 | 0        | 0        | 0        | 54459000 | 0        | 0        | 0        | 2239700 |         |         |
| P07602 | P07602 | Prosaposin;Saposin-A;Saposin-B;Va;Saposin-B;5a    | PSAP     | sp P07602 | 4 | 4 | 4 | 0 | 2 | 1 | 2 | 0 | 2 | 1 | 2   | 4.6    | 58.112   | 0        | 5.5324   | 54197000 | 0        | 13866000 | 2196100  | 38135000 | 0        | 672860   | 1333800  | 2259700 | 0       |         |
| Q8NFF5 | Q8NFF5 | FAD synthase;Molybdenum cofactor biosynthesis     | FLAD1    | sp Q8NFF5 | 4 | 4 | 4 | 0 | 4 | 0 | 0 | 0 | 4 | 0 | 2   | 10.9   | 65.265   | 0        | 14.043   | 54128000 | 0        | 17475000 | 0        | 36653000 | 0        | 3837500  | 0        | 1210300 |         |         |
| Q9H1E5 | Q9H1E5 | Tetraspanin-related transmembrane protein 4       | TMX4     | sp Q9H1E5 | 2 | 2 | 2 | 0 | 0 | 2 | 0 | 0 | 2 | 0 | 0   | 8      | 38.952   | 0        | 5.8273   | 54102000 | 0        | 0        | 0        | 54102000 | 0        | 0        | 0        | 2225000 |         |         |
| Q14373 | Q14373 | Zinc finger protein TRIM7                         | TRIM7    | sp Q14373 | 2 | 2 | 2 | 1 | 1 | 1 | 1 | 1 | 1 | 1 | 1   | 5.1    | 58.489   | 0        | 6.5683   | 54032000 | 39908000 | 4975000  | 2106800  | 57400700 | 0        | 339970   | 1528700  | 277230  |         |         |
| O75190 | O75190 | Dnal1 homolog subfamily B member 6                | DNAL1B   | sp O75190 | 3 | 3 | 3 | 0 | 2 | 3 | 1 | 0 | 2 | 3 | 1   | 10.1   | 36.087   | 0        | 5.2099   | 54069000 | 0        | 19157000 | 9170600  | 25411000 | 0        | 1717400  | 4924000  | 2272200 | 0       |         |
| Q13112 | Q13112 | Chromatin assembly factor 1 subunit B             | CHAF1B   | sp Q13112 | 3 | 3 | 3 | 1 | 2 | 1 | 2 | 1 | 2 | 1 | 2   | 10     | 61.492   | 0        | 6.3331   | 53953000 | 1223400  | 27506000 | 586000   | 24638000 | 1461700  | 1264300  | 1346100  | 982990  | 0       |         |
| Q8W5E6 | Q8W5E6 | Poly(ADP-ribose) glycohydrolase                   | PARG     | sp Q8W5E6 | 3 | 3 | 3 | 0 | 3 | 0 | 3 | 0 | 2 | 0 | 2   | 4.2    | 111.11   | 0        | 6.494    | 53950000 | 0        | 28667000 | 0        | 25283000 | 0        | 2468700  | 0        | 1098100 |         |         |
| Q96JP5 | Q96JP5 | E3 ubiquitin-protein ligase ZFP91                 | ZFP91    | sp Q96JP5 | 2 | 2 | 2 | 0 | 2 | 2 | 2 | 0 | 2 | 2 | 2   | 6.5    | 63.444   | 0.001167 | 2.9199   | 53931000 | 0        | 17349000 | 4623700  | 31958000 | 0        | 1687500  | 2794800  | 1468400 | 0       |         |
| Q9H6L5 | Q9H6L5 | Protein FAM134B                                   | FAM134B  | sp Q9H6L5 | 2 | 2 | 2 | 0 | 1 | 0 | 2 | 0 | 1 | 0 | 2   | 7.6    |          |          |          |          |          |          |          |          |          |          |          |         |         |         |

|        |        |                                                                                      |          |           |   |   |   |   |   |   |   |   |   |   |   |   |   |   |     |        |          |          |          |          |          |          |          |          |          |          |          |         |         |   |
|--------|--------|--------------------------------------------------------------------------------------|----------|-----------|---|---|---|---|---|---|---|---|---|---|---|---|---|---|-----|--------|----------|----------|----------|----------|----------|----------|----------|----------|----------|----------|----------|---------|---------|---|
| P39880 | P39880 | Homeobox protein cut-like 1                                                          | CUX1     | sp P39880 | 3 | 3 | 3 | 0 | 3 | 2 | 1 | 0 | 3 | 2 | 1 | 0 | 3 | 2 | 1   | 2.9    | 164.19   | 0        | 8.1971   | 51484000 | 0        | 37372000 | 1298500  | 12813000 | 0        | 2119800  | 1401200  | 1172900 |         |   |
| Q9H7L9 | Q9H7L9 | Sin3 histone deacetylase corepressor complex subunit 5                               | SUD53    | sp Q9H7L9 | 3 | 3 | 3 | 0 | 3 | 0 | 2 | 0 | 3 | 0 | 2 | 0 | 3 | 0 | 2   | 13.1   | 38.136   | 0.000248 | 3.6965   | 51478000 | 0        | 24454000 | 0        | 27025000 | 0        | 2275800  | 0        | 991800  |         |   |
| Q12894 | Q12894 | Interferon-related developmental regulator 2                                         | IFRD2    | sp Q12894 | 3 | 3 | 3 | 0 | 2 | 0 | 3 | 0 | 2 | 0 | 3 | 0 | 2 | 0 | 3   | 7.3    | 54.813   | 0        | 6.6636   | 51370000 | 0        | 25455000 | 0        | 22515000 | 0        | 1070400  | 0        | 1078400 |         |   |
| P17152 | P17152 | Transmembrane protein 11, mitochondrial                                              | TMEM11   | sp P17152 | 2 | 2 | 2 | 0 | 1 | 1 | 0 | 1 | 0 | 2 | 1 | 1 | 0 | 2 | 1   | 12.5   | 21.541   | 0        | 5.8133   | 51356000 | 0        | 35067000 | 517170   | 15772000 | 0        | 1622800  | 989920   | 1474600 |         |   |
| Q8N4L2 | Q8N4L2 | Type 2 phosphatidylinositol 4,5-bisphosphate 4-phosphatase                           | PTME55A  | sp Q8N4L2 | 2 | 2 | 2 | 0 | 2 | 2 | 0 | 2 | 0 | 2 | 2 | 0 | 2 | 2 | 0   | 12.8   | 28.081   | 0        | 9.869    | 51321000 | 0        | 0        | 2568100  | 48753000 | 0        | 0        | 1732000  | 1998700 |         |   |
| Q9P282 | Q9P282 | Prostaglandin F2 receptor negative regulator                                         | PTGFRN   | sp Q9P282 | 4 | 4 | 4 | 0 | 2 | 0 | 4 | 0 | 2 | 0 | 4 | 0 | 2 | 0 | 4   | 4.7    | 98.555   | 0        | 9.8071   | 51292000 | 0        | 10044000 | 0        | 41248000 | 0        | 989320   | 0        | 1597800 |         |   |
| Q9NVU7 | Q9NVU7 | Protein SDA1 homolog                                                                 | SDA01    | sp Q9NVU7 | 2 | 2 | 2 | 0 | 2 | 1 | 2 | 0 | 2 | 0 | 2 | 1 | 2 | 0 | 2   | 3.5    | 79.87    | 0.001155 | 2.7389   | 51180000 | 0        | 13748000 | 884540   | 36548000 | 0        | 10021200 | 1456700  | 8505300 |         |   |
| P30038 | P30038 | Delta-1-pyrroline-5-carboxylate dehydrogenase, r                                     | ALDH4A1  | sp P30038 | 7 | 7 | 7 | 0 | 7 | 0 | 7 | 0 | 7 | 0 | 7 | 0 | 7 | 0 | 1   | 15.8   | 61.719   | 0        | 14.707   | 51166000 | 0        | 51166000 | 0        | 0        | 0        | 0        | 4510300  | 0       | 0       |   |
| Q16678 | Q16678 | Cytochrome P450 1B1                                                                  | CYP1B1   | sp Q16678 | 2 | 2 | 2 | 0 | 0 | 1 | 2 | 0 | 0 | 1 | 2 | 0 | 0 | 1 | 2   | 5.5    | 60.845   | 0        | 23.657   | 50816000 | 0        | 1395800  | 49420000 | 0        | 0        | 0        | 1884200  | 1086200 | 0       |   |
| P09038 | P09038 | Fibroblast growth factor 2                                                           | FGF2     | sp P09038 | 2 | 2 | 2 | 0 | 0 | 0 | 0 | 0 | 0 | 0 | 2 | 0 | 0 | 0 | 2   | 5.9    | 30.77    | 0.001161 | 2.8255   | 50649000 | 0        | 0        | 0        | 50649000 | 0        | 0        | 0        | 2083000 | 0       | 0 |
| Q99566 | Q99566 | Dual specificity protein phosphatase 9                                               | DUSP9    | sp Q99566 | 2 | 2 | 2 | 0 | 2 | 0 | 2 | 0 | 2 | 0 | 0 | 2 | 0 | 0 | 6.5 | 41.867 | 0.001166 | 2.897    | 50575000 | 0        | 0        | 0        | 50575000 | 0        | 0        | 0        | 4458100  | 0       | 0       |   |
| O95674 | O95674 | Phosphatidate cytidyllyltransferase 2                                                | CDS2     | sp O95674 | 2 | 2 | 2 | 0 | 2 | 0 | 2 | 0 | 2 | 0 | 2 | 0 | 2 | 0 | 2   | 8.5    | 51.417   | 0        | 4.2701   | 50566000 | 0        | 0        | 23407000 | 0        | 27159000 | 0        | 1963700  | 0       | 1216500 |   |
| Q9HAB8 | Q9HAB8 | Phosphopantothenate--cysteine ligase                                                 | PPCS     | sp Q9HAB8 | 4 | 4 | 4 | 0 | 4 | 1 | 1 | 0 | 4 | 1 | 1 | 0 | 4 | 1 | 1   | 11.9   | 34.005   | 0        | 8.5294   | 50465000 | 0        | 43350000 | 1324300  | 5790700  | 0        | 3683700  | 835600   | 430060  |         |   |
| Q16625 | Q16625 | Occludin                                                                             | OCLN     | sp Q16625 | 4 | 4 | 4 | 0 | 4 | 0 | 4 | 0 | 4 | 0 | 4 | 0 | 4 | 0 | 1   | 11.7   | 59.143   | 0        | 6.5674   | 50380000 | 0        | 50380000 | 0        | 0        | 0        | 4449000  | 0        | 0       |         |   |
| Q581D5 | Q581D5 | Transmembrane protein 41B                                                            | TMEM41B  | sp Q581D5 | 1 | 1 | 1 | 1 | 1 | 1 | 1 | 1 | 1 | 1 | 1 | 1 | 1 | 1 | 1   | 6.5    | 32.513   | 0        | 6.0566   | 50324000 | 565940   | 13194000 | 1384200  | 35181000 | 730110   | 10466000 | 936010   | 1393200 |         |   |
| Q9NXX6 | Q9NXX6 | Non-structural maintenance of chromosomes element 4                                  | NSMCE4A  | sp Q9NXX6 | 5 | 5 | 5 | 0 | 5 | 0 | 0 | 0 | 5 | 0 | 0 | 5 | 0 | 0 | 19  | 44.301 | 0        | 9.4654   | 50267000 | 0        | 50267000 | 0        | 0        | 0        | 4431000  | 0        | 0        | 0       | 0       |   |
| P62253 | P62253 | Ubiquitin-conjugating enzyme E2 G1; Ubiquitin-conjugating enzyme 2                   | UBE2G1   | sp P62253 | 1 | 1 | 1 | 0 | 1 | 0 | 1 | 0 | 1 | 0 | 1 | 0 | 1 | 0 | 1   | 5.9    | 19.509   | 0        | 9.1025   | 50043000 | 0        | 22125000 | 0        | 27919000 | 0        | 1950300  | 0        | 1148200 |         |   |
| Q9NVM4 | Q9NVM4 | Protein arginine N-methyltransferase 7                                               | PRMT7    | sp Q9NVM4 | 2 | 2 | 2 | 0 | 2 | 0 | 0 | 0 | 2 | 0 | 0 | 0 | 2 | 0 | 2   | 5.5    | 78.458   | 0        | 9.397    | 50018000 | 0        | 0        | 0        | 50018000 | 0        | 0        | 0        | 2057000 | 0       | 0 |
| Q8WZAO | Q8WZAO | Protein LZIC                                                                         | LZIC     | sp Q8WZAO | 2 | 2 | 2 | 0 | 2 | 0 | 2 | 0 | 2 | 0 | 2 | 0 | 2 | 0 | 2   | 7.9    | 21.494   | 0        | 3.8168   | 50001000 | 0        | 14858000 | 0        | 35142000 | 0        | 1307900  | 0        | 1447100 |         |   |
| Q6P4A7 | Q6P4A7 | Sideroflexin-4                                                                       | SFXN4    | sp Q6P4A7 | 2 | 2 | 2 | 0 | 2 | 2 | 1 | 0 | 2 | 2 | 1 | 0 | 2 | 2 | 1   | 8      | 37.998   | 0.001171 | 2.9737   | 49989000 | 0        | 39255000 | 3745600  | 16918000 | 0        | 2342300  | 2307600  | 1147900 |         |   |
| Q15291 | Q15291 | Retinoblastoma-binding protein 5                                                     | RBBP5    | sp Q15291 | 3 | 3 | 3 | 0 | 3 | 1 | 2 | 0 | 3 | 1 | 2 | 0 | 3 | 1 | 2   | 11.2   | 59.152   | 0        | 5.5667   | 49942000 | 0        | 31496000 | 381260   | 18065000 | 0        | 2250400  | 448010   | 1077000 |         |   |
| P55058 | P55058 | Phospholipid transfer protein                                                        | PLTP     | sp P55058 | 2 | 2 | 2 | 0 | 2 | 0 | 2 | 0 | 2 | 0 | 2 | 0 | 2 | 0 | 2   | 7.3    | 54.739   | 0        | 9.1389   | 49940000 | 0        | 0        | 0        | 49940000 | 0        | 0        | 0        | 2053800 | 0       | 0 |
| Q43924 | Q43924 | Retinal rod rhodopsin-sensitive G-protein 3, 5-cyclic nucleotide phosphodiesterase 6 | PDE6D    | sp Q43924 | 2 | 2 | 2 | 0 | 2 | 0 | 2 | 0 | 2 | 0 | 2 | 0 | 2 | 0 | 2   | 12.7   | 17.42    | 0        | 4.9013   | 49927000 | 0        | 14381000 | 0        | 35546000 | 0        | 1196000  | 0        | 1533500 |         |   |
| Q9NY93 | Q9NY93 | Probable ATP-dependent RNA helicase DDX56                                            | DDX56    | sp Q9NY93 | 3 | 3 | 3 | 1 | 0 | 3 | 3 | 1 | 0 | 3 | 3 | 1 | 0 | 3 | 3   | 7.5    | 61.589   | 0        | 7.8724   | 49867000 | 657370   | 7762400  | 41447000 | 2199000  | 0        | 4011400  | 1367800  | 0       | 0       |   |
| O95229 | O95229 | ZW10 interactor                                                                      | ZWNT     | sp O95229 | 2 | 2 | 2 | 0 | 2 | 0 | 2 | 0 | 2 | 0 | 2 | 0 | 2 | 0 | 2   | 17     | 31.293   | 0        | 9.7115   | 49718000 | 0        | 20688000 | 0        | 29030000 | 0        | 1801200  | 0        | 1216300 |         |   |
| Q5VWJ9 | Q5VWJ9 | Sorting nexin-30                                                                     | SNX30    | sp Q5VWJ9 | 1 | 1 | 1 | 0 | 0 | 1 | 0 | 0 | 1 | 0 | 0 | 0 | 1 | 0 | 0   | 4.3    | 49.676   | 0.007436 | 1.6648   | 49344000 | 0        | 0        | 0        | 49344000 | 0        | 0        | 0        | 2029300 | 0       | 0 |
| Q43772 | Q43772 | Mitochondrial carnitine/acylcarnitine carrier protein 2                              | SLC25A20 | sp Q43772 | 2 | 2 | 2 | 0 | 2 | 0 | 2 | 0 | 2 | 0 | 2 | 0 | 2 | 0 | 2   | 7      | 32.943   | 0        | 4.5083   | 49337000 | 0        | 10735000 | 0        | 38552000 | 0        | 903390   | 0        | 1628700 |         |   |
| Q8NSC5 | Q8NSC5 | S1 RNA-binding domain-containing protein 1                                           | SRRD1    | sp Q8NSC5 | 3 | 3 | 3 | 1 | 3 | 3 | 3 | 1 | 3 | 3 | 3 | 1 | 3 | 3 | 3   | 2.8    | 111.77   | 0        | 4.324    | 49191000 | 5669300  | 13544000 | 3683500  | 26295000 | 5268000  | 1672600  | 1863100  | 1616200 |         |   |
| Q5UC44 | Q5UC44 | ER membrane protein complex subunit 10                                               | EMC10    | sp Q5UC44 | 1 | 1 | 1 | 0 | 1 | 0 | 1 | 0 | 1 | 0 | 1 | 0 | 1 | 0 | 1   | 6.5    | 27.347   | 0        | 7.9952   | 49168000 | 0        | 19938000 | 0        | 12928000 | 0        | 1756800  | 0        | 1202400 |         |   |
| Q136Z5 | Q136Z5 | Apoptosis-stimulating of p53 protein 2                                               | TP53BP2  | sp Q136Z5 | 4 | 4 | 4 | 0 | 4 | 0 | 4 | 0 | 4 | 0 | 4 | 0 | 4 | 0 | 2   | 4      | 5.2      | 125.61   | 0        | 8.6684   | 49151000 | 0        | 6314700  | 0        | 42836000 | 0        | 946810   | 0       | 1371500 |   |
| Q9P1Y5 | Q9P1Y5 | Calmodulin-regulated spectrin-associated protein                                     | CAMSAP3  | sp Q9P1Y5 | 3 | 3 | 3 | 1 | 1 | 0 | 2 | 1 | 1 | 0 | 2 | 1 | 1 | 0 | 2   | 2.8    | 134.75   | 0.00116  | 2.8249   | 49137000 | 0        | 8354200  | 2773200  | 38009000 | 0        | 343540   | 1993700  | 1825900 |         |   |
| Q9BRF8 | Q9BRF8 | Serine/threonine-protein phosphatase CPPED1                                          | CPPED1   | sp Q9BRF8 | 1 | 1 | 1 | 0 | 1 | 0 | 1 | 0 | 1 | 0 | 1 | 0 | 1 | 0 | 1   | 3.5    | 35.548   | 0.000949 | 3.1588   | 49058000 | 0        | 17070000 | 0        | 31988000 | 0        | 1504700  | 0        | 1315500 |         |   |
| Q9BQP7 | Q9BQP7 | Mitochondrial genome maintenance exonuclease                                         | MGM1     | sp Q9BQP7 | 2 | 2 | 2 | 0 | 2 | 0 | 2 | 0 | 2 | 0 | 2 | 0 | 2 | 0 | 2   | 8.1    | 39.42    | 0        | 3.9194   | 49020000 | 0        | 24049000 | 0        | 24971000 | 0        | 1223800  | 0        | 1023100 |         |   |
| Q9Y4A5 | Q9Y4A5 | Transformation/transcription domain-associated protein 1                             | TRRAP    | sp Q9Y4A5 | 4 | 4 | 4 | 0 | 4 | 0 | 4 | 0 | 4 | 0 | 4 | 0 | 4 | 0 | 3   | 1.3    | 437.6    | 0        | 5.805    | 48941000 | 0        | 20537000 | 0        | 28404000 | 0        | 1554400  | 0        | 1424000 |         |   |
| P61626 | P61626 | Lysozyme C                                                                           | LYZ      | sp P61626 | 3 | 3 | 3 | 0 | 3 | 3 | 0 | 3 | 3 | 0 | 3 | 3 | 0 | 3 | 3   | 18.2   | 16.537   | 0        | 5.7159   | 48843000 | 0        | 31126000 | 17717000 | 0        | 2740700  | 11908000 | 0        | 0       | 0       |   |
| Q9ULQ0 | Q9ULQ0 | Striatin-interacting protein 2                                                       | STRIP2   | sp Q9ULQ0 | 1 | 1 | 1 | 0 | 0 | 1 | 0 | 0 | 1 | 0 | 1 | 0 | 0 | 1 | 0   | 3      | 95.358   | 0        | 5.4949   | 48829000 | 0        | 0        | 0        | 48829000 | 0        | 0        | 0        | 2008100 | 0       | 0 |
| Q92858 | Q92858 | Protein atonal homolog 1                                                             | ATOH1    | sp Q92858 | 1 | 1 | 1 | 0 | 1 | 0 | 1 | 0 | 1 | 0 | 1 | 0 | 1 | 0 | 3.1 | 38.16  | 0.008053 | 1.6296   | 48821000 | 0        | 0        | 0        | 48821000 | 0        | 0        | 0        | 32807000 | 0       | 0       |   |
| Q9BQ48 | Q9BQ48 | 39S ribosomal protein L34, mitochondrial                                             | MRPL34   | sp Q9BQ48 | 2 | 2 | 2 | 0 | 2 | 1 | 2 | 0 | 2 | 1 | 2 | 0 | 2 | 1 | 2   | 23.9   | 10.165   | 0        | 6.3742   | 48702000 | 0        | 19088000 | 1525800  | 28087000 | 0        | 1304300  | 1761900  | 796880  |         |   |
| Q9H3G5 | Q9H3G5 | Probable serine carboxypeptidase CPVL                                                | CPVL     | sp Q9H3G5 | 3 | 3 | 3 | 1 | 0 | 0 | 3 | 1 | 0 | 0 | 3 | 1 | 0 | 0 | 9   | 54.163 | 0        | 11.069   | 48695000 | 0        | 43978000 | 4716100  | 0        | 0        | 0        | 3029300  | 4016600  | 0       | 0       |   |
| P62487 | P62487 | DNA-directed RNA polymerase II subunit RPB7                                          | POLR2G   | sp P62487 | 2 | 2 | 2 | 0 | 2 | 0 | 2 | 0 | 2 | 0 | 2 | 0 | 2 | 0 | 2   | 16.3   | 19.294   | 0        | 27.842   | 48618000 | 0        | 14235000 | 0        | 34383000 | 0        | 1267400  | 0        | 1401500 |         |   |
| Q9BY67 | Q9BY67 | Cell adhesion molecule 1                                                             | CADM1    | sp Q9BY67 | 2 | 2 | 2 | 0 | 2 | 0 | 2 | 0 | 2 | 0 | 2 | 0 | 2 | 0 | 2   | 7.2    | 48.509   | 0        | 7.7036   | 48549000 | 0        | 48549000 | 0        | 0        | 0        | 4279600  | 0        | 0       | 0       |   |
| Q9BZL1 | Q9BZL1 | Ubiquitin-like protein 5                                                             | UBL5     | sp Q9BZL1 | 1 | 1 | 1 | 0 | 0 | 1 | 0 | 0 | 1 | 0 | 0 | 1 | 0 | 0 | 1   | 12.3   | 8.9468   | 0.001132 | 2.4616   | 48503000 | 0        | 0        | 0        | 48503000 | 0        | 0        | 0        | 1994700 | 0       | 0 |
| P03905 | P03905 | NAADH-ubiquinone oxidoreductase chain 4                                              | MT-ND4   | sp P03905 | 2 | 2 | 2 | 0 | 1 | 1 | 0 | 1 | 1 | 0 | 1 | 1 | 0 | 1 | 1   | 6.1    | 21.588   | 0        | 4.9956   | 48421000 | 0        | 16218000 | 1740200  | 33462000 | 0        | 1429600  | 1169400  | 0       | 0       |   |
| P23084 | P23084 | Transcription initiation factor 1E subunit beta                                      | GTF2E2   | sp P23084 | 2 | 2 | 2 | 0 | 2 | 0 | 2 | 0 | 2 | 0 | 2 | 0 | 2 | 0 | 2   | 10.7   | 32.043   | 0        | 3.2444   | 48173000 | 0        | 14674000 | 0        | 31988000 | 0        | 1188700  | 0        | 1482400 | 0       | 0 |
| Q9HD34 | Q9HD34 | LYR motif-containing protein 4                                                       | LYRM4    |           |   |   |   |   |   |   |   |   |   |   |   |   |   |   |     |        |          |          |          |          |          |          |          |          |          |          |          |         |         |   |

|        |        |                                                           |          |        |   |   |   |   |   |   |   |   |   |   |      |        |          |          |          |          |          |           |          |          |          |          |          |          |   |         |         |         |         |         |
|--------|--------|-----------------------------------------------------------|----------|--------|---|---|---|---|---|---|---|---|---|---|------|--------|----------|----------|----------|----------|----------|-----------|----------|----------|----------|----------|----------|----------|---|---------|---------|---------|---------|---------|
| Q9BZF3 | Q9BZF3 | Oxysterol-binding protein-related protein 6               | OSBP6    | Q9BZF3 | 2 | 2 | 2 | 0 | 2 | 1 | 2 | 0 | 2 | 1 | 2    | 0      | 2        | 1        | 2        | 2.9      | 106.3    | 0         | 8.5058   | 44800000 | 0        | 10949000 | 2395700  | 31455000 | 0 | 1025300 | 1869300 | 974120  |         |         |
| Q6IQ22 | Q6IQ22 | Ras-related protein Rab-12                                | RAB12    | Q6IQ22 | 2 | 2 | 2 | 0 | 1 | 0 | 1 | 0 | 1 | 0 | 1    | 0      | 1        | 0        | 1        | 12.7     | 27.248   | 0.00095   | 3.1704   | 44629000 | 0        | 7124000  | 0        | 37505000 | 0 | 0       | 0       | 1542400 |         |         |
| Q9UJ14 | Q9UJ14 | Gamma-glutamyltransferase 7; Gamma-glutamyl               | GGT7     | Q9UJ14 | 2 | 2 | 2 | 0 | 1 | 0 | 2 | 0 | 2 | 4 | 7    | 70.466 | 0.008458 | 1.6078   | 44513000 | 0        | 12434000 | 0         | 20379000 | 0        | 13862000 | 0        | 20379000 | 0        | 0 | 0       | 1029100 |         |         |         |
| Q9HSV9 | Q9HSV9 | UFPO428 protein CxorF56                                   | CxorF56  | Q9HSV9 | 2 | 2 | 2 | 0 | 2 | 1 | 1 | 0 | 2 | 1 | 14.9 | 25.624 | 0        | 4.9239   | 44349000 | 0        | 29382000 | 2589800   | 12378000 | 0        | 22061000 | 2037400  | 10291000 | 0        | 0 | 0       | 595920  |         |         |         |
| Q14657 | Q14657 | EKC/KEOPS complex subunit LAGE3                           | LAGE3    | Q14657 | 1 | 1 | 1 | 0 | 1 | 0 | 1 | 0 | 1 | 0 | 16.1 | 14.804 | 0.00114  | 2.5684   | 44325000 | 0        | 20385000 | 0         | 23940000 | 0        | 17969000 | 0        | 0        | 0        | 0 | 984650  |         |         |         |         |
| Q9NP61 | Q9NP61 | ADP-ribosylation factor GTPase-activating protein ARFGAP3 | ARFGAP3  | Q9NP61 | 1 | 1 | 1 | 0 | 1 | 0 | 1 | 0 | 1 | 0 | 1    | 4.5    | 56.928   | 0        | 4.7929   | 44324000 | 0        | 78846000  | 0        | 36440000 | 0        | 695020   | 0        | 0        | 0 | 1498600 |         |         |         |         |
| Q96B8X | Q96B8X | MOB kinase activator 3A                                   | MOB3A    | Q96B8X | 1 | 1 | 1 | 0 | 0 | 0 | 1 | 0 | 0 | 1 | 11.5 | 25.464 | 0.009255 | 1.5514   | 44294000 | 0        | 0        | 0         | 0        | 0        | 34249000 | 0        | 0        | 0        | 0 | 0       | 1821600 |         |         |         |
| Q6NSJ5 | Q6NSJ5 | Volume-regulated anion channel subunit LRRCC8             | LRRCC8   | Q6NSJ5 | 2 | 2 | 2 | 0 | 0 | 0 | 2 | 0 | 0 | 2 | 4.1  | 90.246 | 0.000249 | 3.7642   | 44286000 | 0        | 0        | 0         | 0        | 0        | 44286000 | 0        | 0        | 0        | 0 | 0       | 1821300 |         |         |         |
| Q60927 | Q60927 | Protein phosphatase 1 regulatory subunit 11               | PPP1R11  | Q60927 | 2 | 2 | 2 | 0 | 2 | 0 | 2 | 0 | 2 | 0 | 32.5 | 13.952 | 0.000483 | 3.3944   | 44264000 | 0        | 19071000 | 0         | 0        | 0        | 25193000 | 0        | 0        | 0        | 0 | 0       | 1035800 |         |         |         |
| Q9BQE5 | Q9BQE5 | Apollipoprotein L2                                        | APOL2    | Q9BQE5 | 4 | 4 | 4 | 0 | 0 | 0 | 4 | 0 | 0 | 4 | 13.9 | 37.092 | 0        | 12.021   | 44205000 | 0        | 0        | 0         | 0        | 0        | 44205000 | 0        | 0        | 0        | 0 | 0       | 1817900 |         |         |         |
| P52756 | P52756 | RNA-binding protein 5                                     | RBM5     | P52756 | 4 | 4 | 4 | 0 | 3 | 2 | 2 | 0 | 3 | 2 | 1    | 6      | 92.153   | 0        | 4.6307   | 44161000 | 0        | 16105000  | 6071800  | 21984000 | 0        | 11250000 | 4374900  | 0        | 0 | 0       | 1729000 |         |         |         |
| Q96LJ5 | Q96LJ5 | CCR4-NOT transcription complex subunit 6-like; CNOT6L; C  | CNOT6L   | Q96LJ5 | 2 | 2 | 2 | 0 | 1 | 1 | 2 | 0 | 1 | 1 | 3.2  | 63.001 | 0.000943 | 3.0691   | 44087000 | 0        | 48017000 | 1827200   | 37458000 | 0        | 14352000 | 1333100  | 0        | 0        | 0 | 0       | 0       |         |         |         |
| P08651 | P08651 | Nuclear factor 1 C-type                                   | NFIC     | P08651 | 3 | 3 | 3 | 0 | 2 | 1 | 3 | 0 | 2 | 1 | 3    | 7.1    | 55.674   | 0        | 7.4441   | 44077000 | 0        | 6500200   | 4343200  | 33226000 | 0        | 479830   | 3787900  | 590360   | 0 | 0       | 0       | 0       |         |         |
| P86791 | P86791 | Vacuolar fusion protein CC21 homolog; Vacuolar f          | CC21     | P86791 | 2 | 2 | 2 | 0 | 2 | 0 | 2 | 0 | 2 | 0 | 2    | 5.8    | 55.866   | 0        | 6.6583   | 44063000 | 0        | 12996000  | 0        | 31067000 | 0        | 1056900  | 0        | 0        | 0 | 0       | 0       | 1366300 |         |         |
| Q03426 | Q03426 | Mevalonate kinase                                         | MVK      | Q03426 | 2 | 2 | 2 | 0 | 2 | 0 | 1 | 0 | 2 | 0 | 1    | 8.8    | 42.45    | 0.006406 | 1.7166   | 44046000 | 0        | 20085000  | 0        | 23960000 | 0        | 17705000 | 0        | 0        | 0 | 0       | 0       | 0       |         |         |
| Q8IV48 | Q8IV48 | 3-5 exoribonuclease 1                                     | ERI1     | Q8IV48 | 1 | 1 | 1 | 0 | 0 | 1 | 1 | 0 | 0 | 1 | 4.3  | 40.063 | 0        | 5.0757   | 44015000 | 0        | 0        | 6052900   | 37963000 | 0        | 0        | 4067500  | 1561200  | 0        | 0 | 0       | 0       | 0       | 0       |         |
| Q9NYT0 | Q9NYT0 | Plectstrin-2                                              | PLEK2    | Q9NYT0 | 1 | 1 | 1 | 0 | 0 | 0 | 1 | 0 | 0 | 1 | 6.2  | 39.97  | 0        | 4.5093   | 43978000 | 0        | 0        | 0         | 0        | 0        | 43978000 | 0        | 0        | 0        | 0 | 0       | 0       | 0       | 1808600 |         |
| Q9BRQ6 | Q9BRQ6 | MICOS complex subunit MIC25                               | CHCHD6   | Q9BRQ6 | 3 | 3 | 3 | 0 | 1 | 1 | 3 | 0 | 1 | 1 | 22.1 | 26.457 | 0        | 11.277   | 43969000 | 605250   | 39615000 | 0         | 3748400  | 593400   | 3332400  | 0        | 325690   | 0        | 0 | 0       | 0       | 0       |         |         |
| P13051 | P13051 | Uracil-DNA glycosylase                                    | UNG      | P13051 | 2 | 2 | 2 | 0 | 1 | 0 | 2 | 0 | 1 | 0 | 2    | 16.6   | 34.645   | 0        | 6.4131   | 43913000 | 0        | 15755000  | 0        | 21580000 | 0        | 20688000 | 0        | 0        | 0 | 0       | 0       | 478000  |         |         |
| Q96EA4 | Q96EA4 | Protein Spindly                                           | SPDL1    | Q96EA4 | 2 | 2 | 2 | 0 | 1 | 0 | 2 | 0 | 1 | 0 | 5.1  | 70.171 | 0.000952 | 3.2122   | 43887000 | 0        | 27088000 | 0         | 16799000 | 0        | 18063000 | 0        | 0        | 0        | 0 | 0       | 0       | 1272300 |         |         |
| Q8IVS2 | Q8IVS2 | NADH-CoA acyl carrier protein transacylase, mil           | MCAT     | Q8IVS2 | 2 | 2 | 2 | 0 | 2 | 2 | 1 | 0 | 2 | 2 | 1    | 6.9    | 42.961   | 0        | 5.5654   | 43843000 | 0        | 32968000  | 3032400  | 7843000  | 0        | 29116000 | 1488300  | 866510   | 0 | 0       | 0       | 0       |         |         |
| P03915 | P03915 | NADH-ubiquinone oxidoreductase chain 5                    | MT-ND5   | P03915 | 2 | 2 | 2 | 0 | 2 | 0 | 2 | 0 | 2 | 0 | 2    | 4.6    | 67.026   | 0        | 5.1608   | 43796000 | 0        | 14672000  | 0        | 29124000 | 0        | 13043000 | 0        | 0        | 0 | 0       | 0       | 1186700 |         |         |
| Q9Y624 | Q9Y624 | Junctional adhesion molecule A                            | F11R     | Q9Y624 | 3 | 3 | 3 | 0 | 3 | 0 | 3 | 0 | 3 | 0 | 1    | 14     | 32.583   | 0        | 4.0014   | 43574000 | 0        | 24816000  | 0        | 18758000 | 0        | 20555000 | 0        | 0        | 0 | 0       | 0       | 903440  |         |         |
| P62380 | P62380 | TATA box-binding protein-like protein 1                   | TBPL1    | P62380 | 1 | 1 | 1 | 0 | 0 | 0 | 1 | 0 | 0 | 1 | 9.1  | 20.886 | 0.003901 | 1.919    | 43568000 | 0        | 0        | 0         | 0        | 0        | 43568000 | 0        | 0        | 0        | 0 | 0       | 0       | 0       | 1791800 |         |
| Q6P1K8 | Q6P1K8 | General transcription factor IIf subunit 2-like pro       | GTF2H2C  | Q6P1K8 | 1 | 1 | 1 | 0 | 1 | 1 | 1 | 0 | 1 | 1 | 2.3  | 44.452 | 0.006013 | 1.7751   | 43456000 | 0        | 75967000 | 2487000   | 33373000 | 0        | 786740   | 1800300  | 1126300  | 0        | 0 | 0       | 0       | 0       | 0       |         |
| Q6ZVM7 | Q6ZVM7 | Tom1-like protein 2                                       | TOM1L2   | Q6ZVM7 | 1 | 1 | 1 | 0 | 0 | 1 | 0 | 0 | 1 | 0 | 1    | 5.3    | 55.556   | 0.008633 | 1.5582   | 43451000 | 0        | 0         | 0        | 0        | 0        | 43451000 | 0        | 0        | 0 | 0       | 0       | 0       | 0       | 1787000 |
| Q96LD4 | Q96LD4 | Tripartite motif-containing protein 47                    | TRIM47   | Q96LD4 | 2 | 2 | 2 | 0 | 0 | 0 | 2 | 0 | 0 | 2 | 7.2  | 69.531 | 0        | 4.3119   | 43352000 | 0        | 0        | 0         | 0        | 0        | 43352000 | 0        | 0        | 0        | 0 | 0       | 0       | 0       | 1779200 |         |
| Q92733 | Q92733 | Proline-rich protein PRC                                  | PRC      | Q92733 | 4 | 4 | 4 | 0 | 0 | 0 | 0 | 0 | 0 | 4 | 0    | 17.3   | 52.417   | 0        | 26.697   | 43243000 | 0        | 43243000  | 0        | 0        | 0        | 0        | 0        | 0        | 0 | 0       | 0       | 0       | 0       |         |
| Q96E15 | Q96E15 | Transcription elongation factor A protein-like 4          | TCEAL4   | Q96E15 | 3 | 3 | 3 | 0 | 3 | 3 | 3 | 0 | 3 | 3 | 3    | 20.5   | 24.647   | 0        | 15.463   | 43185000 | 0        | 9694500   | 2904900  | 3058615  | 0        | 38119000 | 1562600  | 1207100  | 0 | 0       | 0       | 0       | 0       | 0       |
| Q60427 | Q60427 | Fatty acid desaturase 1                                   | FADS1    | Q60427 | 2 | 2 | 2 | 0 | 1 | 0 | 2 | 0 | 1 | 0 | 2    | 7      | 51.964   | 0        | 5.7169   | 42920000 | 0        | 4938600   | 0        | 37981000 | 0        | 0        | 0        | 0        | 0 | 0       | 0       | 0       | 0       | 1562000 |
| Q9HC68 | Q9HC68 | Pre-mRNA-splicing factor CWC22 homolog                    | CWC22    | Q9HC68 | 4 | 4 | 4 | 0 | 4 | 3 | 3 | 0 | 4 | 3 | 3    | 6.1    | 105.47   | 0        | 7.3434   | 42910000 | 0        | 212211000 | 6071700  | 15517000 | 0        | 1546400  | 3688100  | 1178500  | 0 | 0       | 0       | 0       | 0       | 0       |
| P23378 | P23378 | Glycine dehydrogenase (decarboxylating), mito             | GLDC     | P23378 | 1 | 1 | 1 | 0 | 1 | 0 | 1 | 0 | 0 | 1 | 0    | 2.2    | 112.73   | 0        | 21.67    | 42658000 | 0        | 42658000  | 0        | 0        | 0        | 3760300  | 0        | 0        | 0 | 0       | 0       | 0       | 0       | 0       |
| Q8N2K0 | Q8N2K0 | Monoacylglycerol lipase ABHD12                            | ABHD12   | Q8N2K0 | 2 | 2 | 2 | 0 | 1 | 2 | 0 | 0 | 1 | 2 | 0    | 5.3    | 45.096   | 0        | 4.9654   | 42593000 | 0        | 0         | 1034900  | 41558000 | 0        | 0        | 1001100  | 1403500  | 0 | 0       | 0       | 0       | 0       | 0       |
| Q13309 | Q13309 | S-phase kinase-associated protein 2                       | SKP2     | Q13309 | 2 | 2 | 2 | 0 | 0 | 0 | 0 | 0 | 0 | 2 | 0    | 6.1    | 47.76    | 0        | 7.0818   | 42407000 | 0        | 42407000  | 0        | 0        | 0        | 3782000  | 0        | 0        | 0 | 0       | 0       | 0       | 0       | 0       |
| Q75832 | Q75832 | 26S proteasome non-ATPase regulatory subunit 1            | PSMD10   | Q75832 | 1 | 1 | 1 | 0 | 1 | 0 | 1 | 0 | 1 | 0 | 1    | 5.3    | 24.428   | 0.004535 | 1.8408   | 42355000 | 0        | 23257000  | 0        | 19098000 | 0        | 20581000 | 0        | 0        | 0 | 0       | 0       | 0       | 785420  |         |
| P11117 | P11117 | Lysosomal acid phosphatase                                | ACP2     | P11117 | 2 | 2 | 2 | 0 | 1 | 0 | 2 | 0 | 1 | 0 | 2    | 5.9    | 48.344   | 0        | 4.2577   | 42259000 | 0        | 11399000  | 0        | 30859000 | 0        | 1004900  | 0        | 0        | 0 | 0       | 0       | 0       | 1269100 |         |
| Q8IYS2 | Q8IYS2 | Uncharacterized protein KIAA2013                          | KIAA2013 | Q8IYS2 | 2 | 2 | 2 | 0 | 0 | 0 | 2 | 0 | 2 | 0 | 4.3  | 69.156 | 0        | 6.1518   | 42247000 | 0        | 0        | 0         | 0        | 0        | 42247000 | 0        | 0        | 0        | 0 | 0       | 0       | 0       | 1737400 |         |
| Q9NUL7 | Q9NUL7 | Probable ATP-dependent RNA helicase DDX28                 | DDX28    | Q9NUL7 | 1 | 1 | 1 | 0 | 0 | 2 | 0 | 0 | 1 | 0 | 2    | 8.3    | 59.58    | 0        | 8.9296   | 42235000 | 0        | 4108700   | 0        | 38126000 | 0        | 643440   | 0        | 0        | 0 | 0       | 0       | 0       | 1286700 |         |
| Q6Y1H2 | Q6Y1H2 | Very-long-chain (3R)-3-hydroxyacyl-CoA dehydrat           | HACD2    | Q6Y1H2 | 2 | 2 | 2 | 0 | 2 | 0 | 2 | 0 | 2 | 0 | 2    | 7.5    | 28.368   | 0.002661 | 2.1802   | 42182000 | 0        | 14370000  | 0        | 27812000 | 0        | 12576000 | 0        | 0        | 0 | 0       | 0       | 0       | 1152900 |         |
| P53365 | P53365 | Arfapin-2                                                 | ARFIP2   | P53365 | 2 | 2 | 2 | 0 | 2 | 0 | 1 | 0 | 2 | 0 | 1    | 7.9    | 37.855   | 0        | 5.5436   | 42159000 | 0        | 27345000  | 0        | 14814000 | 0        | 2410400  | 0        | 0        | 0 | 0       | 0       | 0       | 0       | 0       |
| Q9UDR5 | Q9UDR5 | Alpha-aminoacidic semialdehyde synthase, mito             | AASS     | Q9UDR5 | 3 | 3 | 3 | 0 | 2 | 0 | 1 | 0 | 2 | 0 | 1    | 5.6    | 102.13   | 0        | 12.761   | 42129000 | 0        | 21553000  | 0        | 20576000 | 0        | 1899900  | 0        | 0        | 0 | 0       | 0       | 0       | 0       | 0       |
| P28065 | P28065 | Proteasome subunit beta type-9                            | PSMB9    | P28065 | 1 | 1 | 1 | 0 | 0 | 0 | 1 | 0 | 0 | 1 | 6.8  | 23.264 | 0.000247 | 3.6643   | 42074000 | 0        | 0        | 0         | 0        | 0        | 42074000 | 0        | 0        | 0        | 0 | 0       | 0       | 0       | 1730300 |         |
| Q9I968 | Q9I968 | Mitochondrial peptide methionine sulfoxide redu           | MSRA     | Q9I968 | 3 | 3 | 3 | 0 | 3 | 0 | 3 | 0 | 3 | 0 | 16.6 | 26.132 | 0        | 3.9568   | 42039000 | 0        | 39973000 | 0         | 38042000 | 0        | 524480   | 0        | 0        | 0        | 0 | 0       | 0       | 0       | 1392400 |         |
| P32970 | P32970 | C3D70 antigen                                             | C3D70    | P32970 | 1 | 1 | 1 | 0 | 1 | 0 | 1 | 0 | 1 | 0 | 1    | 7.3    | 21.118   | 0        | 4.0215   | 41845000 | 0        | 41845000  | 0        | 0        | 0        | 41845000 | 0        | 0        | 0 | 0       | 0       | 0       | 0       | 1729000 |
| Q60879 | Q60879 | Protein diaphanous homolog 2                              | DIAPH2   | Q60879 | 3 | 3 | 3 | 0 | 2 | 0 | 2 | 0 | 2 | 0 | 2    | 4.4    | 125.57   | 0        | 12.524   | 41712000 | 0        | 11457000  | 0        | 30255000 | 0        | 16372000 | 0        | 0        |   |         |         |         |         |         |

|           |           |                                                     |           |           |   |   |   |   |   |   |   |   |   |   |   |   |      |        |          |        |          |          |          |          |          |          |          |         |          |          |         |         |
|-----------|-----------|-----------------------------------------------------|-----------|-----------|---|---|---|---|---|---|---|---|---|---|---|---|------|--------|----------|--------|----------|----------|----------|----------|----------|----------|----------|---------|----------|----------|---------|---------|
| Q9P291    | Q9P291    | Armaddillo repeat-containing X-linked protein 1     | ARMCK1    | sj Q9P291 | 3 | 3 | 3 | 0 | 0 | 0 | 0 | 3 | 0 | 0 | 0 | 0 | 3    | 8.4    | 49.18    | 0      | 7.5618   | 39077000 | 0        | 0        | 0        | 39077000 | 0        | 0       | 0        | 406400   | 0       | 1607100 |
| Q12802    | Q12802    | A-kinase anchor protein 13                          | AKAP13    | sj Q12802 | 4 | 4 | 4 | 0 | 1 | 0 | 4 | 0 | 1 | 0 | 0 | 4 | 2.1  | 307.55 | 0        | 17.629 | 38896000 | 0        | 2812400  | 0        | 36083000 | 0        | 0        | 0       | 13255000 |          |         |         |
| P46100    | P46100    | Transcriptional regulator ATRX                      | ATRX      | sj P46100 | 6 | 6 | 6 | 2 | 1 | 0 | 2 | 1 | 0 | 6 | 2 | 1 | 3.2  | 282.58 | 0        | 11.849 | 38868000 | 0        | 34207000 | 1899900  | 2761000  | 0        | 2857100  | 1322100 | 2264700  |          |         |         |
| P78381    | P78381    | UDP-galactose translocator                          | SLC35A2   | sj P78381 | 2 | 2 | 2 | 0 | 1 | 0 | 2 | 0 | 1 | 0 | 2 | 0 | 10.9 | 41.307 | 0        | 6.8599 | 38800000 | 0        | 3063500  | 0        | 35737000 | 0        | 446990   | 0       | 1292700  |          |         |         |
| P53384    | P53384    | Cytosolic Fe-S cluster assembly factor NUBP1        | NUBP1     | sj P53384 | 2 | 2 | 2 | 1 | 1 | 0 | 2 | 1 | 1 | 0 | 2 | 0 | 11.9 | 34.534 | 0        | 4.3869 | 38713000 | 8936400  | 4515600  | 0        | 25261000 | 6870100  | 2738000  | 0       | 7724500  |          |         |         |
| Q96120    | Q96120    | PRKC apoptosis WT1 regulator protein                | PAWR      | sj Q96120 | 4 | 4 | 4 | 0 | 4 | 2 | 0 | 4 | 2 | 0 | 0 | 0 | 16.5 | 36.567 | 0        | 8.389  | 38698000 | 0        | 35538000 | 0        | 31603000 | 0        | 2384300  | 0       | 2872100  |          |         |         |
| Q02127    | Q02127    | Dihydroorotate dehydrogenase (quinone), mitoch      | DHODH     | sj Q02127 | 3 | 3 | 3 | 0 | 1 | 1 | 0 | 3 | 1 | 1 | 0 | 3 | 1    | 10.6   | 42.867   | 0      | 6.8445   | 38520000 | 0        | 25972000 | 2071500  | 10477000 | 0        | 1400600 | 1581800  | 1130000  |         |         |
| Q13685    | Q13685    | Angio-associated migratory cell protein             | AAMP      | sj Q13685 | 3 | 3 | 3 | 0 | 1 | 0 | 3 | 0 | 1 | 0 | 3 | 0 | 3    | 9.9    | 46.75    | 0      | 18.002   | 38466000 | 0        | 4566100  | 0        | 33900000 | 0        | 1078000 | 0        | 718650   |         |         |
| Q6UXH1    | Q6UXH1    | Cysteine-rich with EGF-like domain protein 2        | CREL2     | sj Q6UXH1 | 3 | 3 | 3 | 0 | 0 | 3 | 0 | 0 | 3 | 0 | 3 | 0 | 8.5  | 38.191 | 0        | 6.5974 | 38354000 | 0        | 15314000 | 0        | 23040000 | 0        | 1233000  | 0       | 1064200  |          |         |         |
| Q95479    | Q95479    | GDH/PGC endoplasmic bifunctional protein/Glc H6PD   | GDH       | sj Q95479 | 3 | 3 | 3 | 0 | 1 | 3 | 0 | 0 | 1 | 3 | 0 | 3 | 4.8  | 88.892 | 0        | 9.6912 | 38325000 | 0        | 0        | 0        | 5698600  | 0        | 3267000  | 0       | 4658400  | 512800   |         |         |
| Q96C48    | Q96C48    | Acyl-CoA synthetase family member 2, mitochondrial  | ACS2      | sj Q96C48 | 2 | 2 | 2 | 0 | 0 | 2 | 0 | 0 | 2 | 0 | 0 | 2 | 6.3  | 68.124 | 0        | 13.4   | 38273000 | 0        | 0        | 0        | 38272000 | 0        | 0        | 0       | 1574000  |          |         |         |
| Q6P1X5    | Q6P1X5    | Transcription initiation factor TFIIID subunit 2    | TAIF2     | sj Q6P1X5 | 3 | 3 | 3 | 0 | 3 | 0 | 3 | 0 | 3 | 0 | 3 | 0 | 3.4  | 136.97 | 0        | 5.9    | 38163000 | 0        | 0        | 0        | 31357000 | 0        | 6805900  | 0       | 1320800  | 0        | 1723200 |         |
| Q8NC96    | Q8NC96    | Adaptin ear-binding coat-associated protein 1       | NECAP1    | sj Q8NC96 | 2 | 2 | 2 | 0 | 2 | 0 | 2 | 0 | 2 | 0 | 2 | 0 | 11.6 | 29.737 | 0.001142 | 2.5804 | 38160000 | 0        | 17899000 | 0        | 20271000 | 0        | 1700400  | 0       | 710180   |          |         |         |
| Q9Y3C1    | Q9Y3C1    | Nucleolar protein 16                                | NOPI6     | sj Q9Y3C1 | 3 | 3 | 3 | 1 | 3 | 0 | 3 | 1 | 3 | 1 | 3 | 0 | 14   | 21.188 | 0.000944 | 3.0872 | 38109000 | 0        | 18403000 | 2685400  | 17020000 | 0        | 1253500  | 2416900 | 456320   |          |         |         |
| Q5TA45    | Q5TA45    | Integrator complex subunit 11                       | CPSF3L    | sj Q5TA45 | 2 | 2 | 2 | 0 | 1 | 0 | 2 | 0 | 1 | 0 | 2 | 0 | 4.7  | 67.662 | 0.001147 | 2.6236 | 37931000 | 0        | 9016600  | 0        | 28914000 | 0        | 794800   | 0       | 1189100  |          |         |         |
| O14966;P5 | O14966    | Ras-related protein Rab-7L1                         | RAB29     | sj O14966 | 2 | 2 | 2 | 0 | 0 | 0 | 2 | 0 | 0 | 2 | 0 | 2 | 14.8 | 23.155 | 0        | 5.0503 | 37867000 | 0        | 0        | 0        | 37867000 | 0        | 0        | 0       | 1557300  |          |         |         |
| Q9NUL3    | Q9NUL3    | Double-stranded RNA-binding protein Staufeu ho      | STAU2     | sj Q9NUL3 | 4 | 4 | 4 | 2 | 1 | 4 | 4 | 1 | 2 | 2 | 2 | 2 | 7    | 62.608 | 0        | 5.9763 | 37849000 | 1059800  | 12721000 | 4404500  | 19664000 | 1682400  | 862150   | 2766500 | 638650   |          |         |         |
| Q8NI99    | Q8NI99    | Angiopoietin-related protein 6                      | ANGPTL6   | sj Q8NI99 | 1 | 1 | 1 | 1 | 1 | 0 | 1 | 1 | 1 | 1 | 1 | 0 | 2.8  | 51.694 | 0.000486 | 3.4674 | 37639000 | 0        | 10680000 | 10653000 | 16818000 | 0        | 1122500  | 5816600 | 1807900  |          |         |         |
| O14936    | O14936    | Peripheral plasma membrane protein CASK             | CASK      | sj O14936 | 3 | 3 | 3 | 0 | 2 | 1 | 3 | 0 | 2 | 1 | 3 | 0 | 3.8  | 105.12 | 0.002248 | 3.7355 | 37596000 | 0        | 7044100  | 1025800  | 29526000 | 0        | 780810   | 1165000 | 578750   |          |         |         |
| P43378    | P43378    | Tyrosine-protein phosphatase non-receptor type      | PTPN9     | sj P43378 | 3 | 3 | 3 | 0 | 2 | 0 | 3 | 0 | 2 | 0 | 3 | 0 | 5.9  | 68.019 | 0        | 5.5392 | 37561000 | 0        | 5784200  | 0        | 31777000 | 0        | 576250   | 0       | 1240200  |          |         |         |
| Q9NP16    | Q9NP16    | mRNA-decapping enzyme 1A                            | DCP1A     | sj Q9NP16 | 3 | 3 | 3 | 1 | 2 | 0 | 3 | 1 | 2 | 0 | 3 | 0 | 6.5  | 63.278 | 0        | 5.497  | 37512000 | 279770   | 18093000 | 0        | 19139000 | 418430   | 1631500  | 0       | 611840   |          |         |         |
| Q8NEB9    | Q8NEB9    | Phosphatidylinositol 3-kinase catalytic subunit typ | PIK3C3    | sj Q8NEB9 | 3 | 3 | 3 | 0 | 1 | 1 | 2 | 0 | 1 | 1 | 2 | 0 | 3.6  | 101.55 | 0        | 7.8074 | 37408000 | 0        | 3615600  | 0        | 30650000 | 0        | 847470   | 0       | 731750   |          |         |         |
| Q9HOW9    | Q9HOW9    | Ester hydrolase C11orf54                            | C11orf54  | sj Q9HOW9 | 2 | 2 | 2 | 0 | 2 | 0 | 2 | 0 | 2 | 0 | 2 | 0 | 12.1 | 35.117 | 0.001562 | 2.2664 | 37386000 | 0        | 37386000 | 0        | 0        | 0        | 3295500  | 0       | 0        | 0        | 0       |         |
| Q9P017    | Q9P017    | E3 ubiquitin-protein ligase KCMF1                   | KCMF1     | sj Q9P017 | 2 | 2 | 2 | 0 | 2 | 0 | 2 | 0 | 2 | 0 | 2 | 0 | 10.2 | 41.945 | 0        | 6.2211 | 37312000 | 0        | 8278300  | 0        | 29034000 | 0        | 739040   | 0       | 1184700  |          |         |         |
| Q94888    | Q94888    | UBX domain-containing protein 7                     | UBXK7     | sj Q94888 | 2 | 2 | 2 | 0 | 2 | 0 | 2 | 0 | 2 | 0 | 2 | 0 | 6.3  | 54.862 | 0        | 6.8311 | 37312000 | 0        | 37312000 | 0        | 0        | 0        | 3289000  | 0       | 0        | 0        | 0       |         |
| Q96LR5;Q5 | Q96LR5;Q5 | Ubiquitin-conjugating enzyme E2 U2;Ubiquitin-co     | UBE2E2;Uf | sj Q96LR5 | 2 | 1 | 1 | 0 | 2 | 0 | 2 | 0 | 1 | 0 | 2 | 0 | 1    | 12.9   | 22.255   | 0      | 7.0748   | 37206000 | 0        | 14456000 | 0        | 22750000 | 0        | 1274300 | 0        | 935610   |         |         |
| P30049    | P30049    | ATP synthase subunit delta, mitochondrial           | ATP5D     | sj P30049 | 1 | 1 | 1 | 1 | 1 | 0 | 1 | 1 | 0 | 1 | 1 | 0 | 8.3  | 17.449 | 0        | 4.8655 | 37160000 | 5170600  | 32016000 | 0        | 0        | 5170600  | 2823200  | 0       | 0        | 0        | 0       |         |
| Q06YV9    | Q06YV9    | Hermansky-Pudlak syndrome 6 protein                 | HP6       | sj Q06YV9 | 2 | 2 | 2 | 0 | 2 | 0 | 2 | 0 | 2 | 0 | 2 | 0 | 3.2  | 82.974 | 0.000249 | 3.7491 | 37139000 | 0        | 9609700  | 0        | 0        | 0        | 27529000 | 0       | 1080700  | 0        | 898510  |         |
| Q81484    | Q81484    | Ankyrin-2                                           | ANK2      | sj Q81484 | 6 | 5 | 5 | 0 | 2 | 1 | 6 | 0 | 1 | 0 | 5 | 0 | 5    | 2      | 43.71    | 0      | 7.5752   | 37130000 | 0        | 3319000  | 0        | 32811000 | 0        | 584710  | 0        | 1098900  |         |         |
| Q9UI14    | Q9UI14    | Prenylated Rab acceptor protein 1                   | RABAC1    | sj Q9UI14 | 1 | 1 | 1 | 0 | 1 | 0 | 1 | 0 | 1 | 0 | 1 | 0 | 7.6  | 20.648 | 0        | 4.8753 | 36894000 | 0        | 11405000 | 0        | 25489000 | 0        | 1005300  | 0       | 1048200  |          |         |         |
| Q5VT25    | Q5VT25    | Serine/threonine-protein kinase MRCK alpha          | CDC42BPA  | sj Q5VT25 | 5 | 4 | 4 | 0 | 2 | 3 | 3 | 0 | 2 | 2 | 2 | 0 | 4    | 197.3  | 0        | 9.1762 | 36846000 | 0        | 11729000 | 15400000 | 9716600  | 0        | 2422200  | 8960400 | 0        | 0        |         |         |
| Q9Y296    | Q9Y296    | Trafficking protein particle complex subunit 4      | TRAPP4C   | sj Q9Y296 | 2 | 2 | 2 | 0 | 1 | 0 | 2 | 0 | 1 | 0 | 2 | 0 | 11.4 | 24.34  | 0        | 5.6997 | 36834000 | 0        | 10719000 | 0        | 26115000 | 0        | 0        | 0       | 1074000  |          |         |         |
| Q02153    | Q02153    | Guanylate cyclase soluble subunit beta-1            | GUCY1B3   | sj Q02153 | 2 | 2 | 2 | 0 | 0 | 0 | 2 | 0 | 0 | 2 | 0 | 0 | 3.7  | 70.514 | 0        | 5.5469 | 36776000 | 0        | 0        | 0        | 36776000 | 0        | 0        | 0       | 1512400  |          |         |         |
| O15164    | O15164    | Transcription intermediary factor 1-alpha           | TRIM24    | sj O15164 | 3 | 3 | 3 | 0 | 2 | 0 | 3 | 0 | 2 | 0 | 3 | 0 | 4.7  | 116.83 | 0        | 4.2664 | 36655000 | 0        | 10067000 | 0        | 26588000 | 0        | 963970   | 0       | 1016900  |          |         |         |
| P40818    | P40818    | Ubiquitin carboxyl-terminal hydrolase 8             | USP8      | sj P40818 | 1 | 1 | 1 | 1 | 1 | 0 | 1 | 1 | 1 | 1 | 1 | 0 | 1.5  | 127.52 | 0        | 5.1666 | 36611000 | 0        | 9239200  | 2193600  | 25178000 | 0        | 814420   | 1474100 | 1035500  |          |         |         |
| Q9GZT9;Q  | Q9GZT9    | Egl nine homolog 1                                  | EGLN1     | sj Q9GZT9 | 3 | 3 | 3 | 0 | 3 | 1 | 3 | 0 | 3 | 1 | 3 | 0 | 1    | 5.6    | 46.02    | 0      | 4.8777   | 36589000 | 0        | 30849000 | 325390   | 5415100  | 0        | 2730200 | 214220   | 216190   |         |         |
| P24844    | P24844    | Myosin regulatory light polypeptide 9               | MYL9      | sj P24844 | 6 | 1 | 1 | 3 | 5 | 6 | 6 | 0 | 1 | 1 | 0 | 0 | 1    | 44.8   | 19.827   | 0      | 9.0883   | 36577000 | 0        | 0        | 0        | 2405500  | 34172000 | 0       | 0        | 1616500  | 1405300 |         |
| Q9GZU8    | Q9GZU8    | Protein FAM192A                                     | FAM192A   | sj Q9GZU8 | 4 | 4 | 4 | 0 | 4 | 0 | 4 | 0 | 3 | 0 | 4 | 0 | 3    | 12.6   | 28.912   | 0      | 81.364   | 36473000 | 0        | 15229000 | 0        | 21244000 | 0        | 1378900 | 0        | 837210   |         |         |
| Q8IZ05    | Q8IZ05    | Selenoprotein H                                     | SELH      | sj Q8IZ05 | 1 | 1 | 1 | 0 | 1 | 1 | 1 | 0 | 1 | 1 | 1 | 0 | 7.4  | 13.453 | 0.003083 | 2.1103 | 36411000 | 0        | 3390300  | 2851700  | 30169000 | 0        | 407740   | 2217300 | 830800   |          |         |         |
| P42574    | P42574    | Caspase-3,Caspase-3 subunit p17,Caspase-3 subu      | CASP3     | sj P42574 | 1 | 1 | 1 | 0 | 1 | 0 | 1 | 0 | 1 | 0 | 1 | 0 | 6.9  | 31.608 | 0.001158 | 2.7791 | 36372000 | 0        | 16498000 | 0        | 19874000 | 0        | 1454300  | 0       | 817330   |          |         |         |
| O15321    | O15321    | Transmembrane 9 superfamily member 1                | TNMF5F1   | sj O15321 | 2 | 2 | 2 | 0 | 2 | 0 | 2 | 0 | 2 | 0 | 2 | 0 | 3.3  | 68.86  | 0.004545 | 1.8832 | 36347000 | 0        | 9058400  | 0        | 27288000 | 0        | 0        | 0       | 1123200  |          |         |         |
| Q9NX24    | Q9NX24    | H/ACA ribonucleoprotein complex subunit 2           | NHP2      | sj Q9NX24 | 1 | 1 | 1 | 0 | 1 | 1 | 1 | 0 | 1 | 1 | 1 | 0 | 12.4 | 17.201 | 0.001142 | 2.5789 | 36346000 | 0        | 11849000 | 7804800  | 16693000 | 0        | 1044400  | 5244800 | 686500   |          |         |         |
| Q9HA65    | Q9HA65    | TBC1 domain family member 17                        | TBC1D17   | sj Q9HA65 | 3 | 3 | 3 | 0 | 2 | 0 | 3 | 0 | 2 | 0 | 3 | 0 | 5.4  | 72.727 | 0        | 6.0999 | 36257000 | 0        | 7041100  | 0        | 29216000 | 0        | 715640   | 0       | 1106500  |          |         |         |
| Q9HG44    | Q9HG44    | Golgi-associated plant pathogenesis-related prot    | GLP2      | sj Q9HG44 | 2 | 2 | 2 | 0 | 2 | 0 | 2 | 0 | 2 | 0 | 2 | 0 | 16.9 | 17.218 | 0.000483 | 4.2788 | 36251000 | 0        | 10600000 | 0        | 26550000 | 0        | 912750   | 0       | 1076600  |          |         |         |
| Q96F63    | Q96F63    | Serpin B12                                          | SERPIN12  | sj Q96F63 | 4 | 4 | 4 | 0 | 1 | 4 | 0 | 1 | 4 | 0 | 1 | 4 | 0    | 10.1   | 46.276   | 0      | 7.0826   | 36220000 | 0        | 6146900  | 30073000 | 0        | 0        | 0       | 689460   | 20061000 | 0       |         |
| Q9UK59    | Q9UK59    | Lariat debranching enzyme                           | DBR1      | sj Q9UK59 | 2 | 2 | 2 | 0 | 1 | 2 | 0 | 1 | 2 | 0 | 1 | 2 | 0    | 5.7    | 61.554   | 0      | 5.712    | 36208000 | 0        | 0        | 0        | 1331200  | 34877000 | 0       | 0        | 1317500  | 1011500 |         |
| Q95825    | Q95825    | Quinone oxidoreductase-like protein 1               | CRY2L1    | sj Q95825 | 2 | 1 | 1 | 0 | 0 | 1 | 0 | 0 | 0 | 1 | 0 | 0 | 6    | 38.696 | 0        | 13.654 | 36105000 | 0        | 36105000 | 0        | 0        | 0        | 3182600  | 0       | 0        |          |         |         |



|        |        |                                                   |            |           |    |   |   |   |   |   |    |   |   |   |   |      |        |          |          |          |          |          |          |          |          |         |          |         |         |         |
|--------|--------|---------------------------------------------------|------------|-----------|----|---|---|---|---|---|----|---|---|---|---|------|--------|----------|----------|----------|----------|----------|----------|----------|----------|---------|----------|---------|---------|---------|
| P42357 | P42357 | Histidine ammonia-lyase                           | HAL        | sp P42357 | 5  | 5 | 5 | 1 | 0 | 5 | 0  | 1 | 0 | 5 | 0 | 10.4 | 72.697 | 0        | 9.6455   | 30742000 | 68118    | 0        | 30674000 | 0        | 68118    | 0       | 20613000 | 0       | 207210  |         |
| Q9Y6K0 | Q9Y6K0 | Choline/ethanolaminephosphotransferase 1          | CEPT1      | sp Q9Y6K0 | 3  | 3 | 3 | 0 | 2 | 0 | 3  | 0 | 2 | 0 | 3 | 8.7  | 46.553 | 0        | 3.8256   | 30635000 | 0        | 9771100  | 0        | 20864000 | 0        | 1512100 | 0        | 207210  |         |         |
| P62837 | P62837 | Ubiquitin-conjugating enzyme E2 D2                | UBE2D2     | sp P62837 | 3  | 3 | 3 | 0 | 1 | 3 | 0  | 1 | 0 | 1 | 0 | 1    | 24.5   | 16.735   | 0.007447 | 1.687    | 30633000 | 0        | 13313000 | 0        | 17320000 | 0       | 1173500  | 0       | 712300  |         |
| Q96EL3 | Q96EL3 | 3S5 ribosomal protein L53, mitochondrial          | MRPL53     | sp Q96EL3 | 1  | 1 | 1 | 0 | 0 | 1 | 0  | 0 | 0 | 1 | 0 | 16.1 | 12.107 | 0.002247 | 3.6591   | 30593000 | 0        | 0        | 0        | 30593000 | 0        | 0       | 0        | 1258100 |         |         |
| Q9UQR0 | Q9UQR0 | Sex comb on midleg-like protein 2                 | SCML2      | sp Q9UQR0 | 3  | 3 | 3 | 0 | 0 | 0 | 3  | 0 | 0 | 3 | 0 | 5.9  | 77.256 | 0        | 4.8195   | 30559000 | 0        | 30559000 | 0        | 0        | 0        | 2693700 | 0        | 0       |         |         |
| Q9NXA8 | Q9NXA8 | NAD-dependent protein deacetylase sirtuin-5, mito | SIRT5      | sp Q9NXA8 | 2  | 2 | 2 | 0 | 2 | 0 | 2  | 0 | 2 | 0 | 1 | 10.6 | 33.881 | 0        | 7.5774   | 30455000 | 0        | 20567000 | 0        | 9888700  | 0        | 1508000 | 0        | 711620  |         |         |
| O15439 | O15439 | Multidrug resistance-associated protein 4         | ABCC4      | sp O15439 | 2  | 2 | 2 | 0 | 0 | 0 | 2  | 0 | 0 | 2 | 0 | 2    | 149.52 | 0        | 10.327   | 30433000 | 0        | 0        | 0        | 30433000 | 0        | 0       | 0        | 1251600 |         |         |
| Q15014 | Q15014 | Mortality factor 4-like protein 2                 | MORF4L2    | sp Q15014 | 3  | 3 | 3 | 2 | 3 | 2 | 3  | 2 | 3 | 2 | 1 | 2    | 13.2   | 32.307   | 0.003912 | 1.9519   | 30367000 | 0        | 10739000 | 750520   | 18877000 | 0       | 663360   | 1148700 | 415240  |         |
| O9Y303 | O9Y303 | Putative N-acetylglucosamine-6-phosphate dease    | AMDHD2     | sp O9Y303 | 1  | 1 | 1 | 0 | 0 | 1 | 0  | 0 | 1 | 0 | 0 | 1    | 2.9    | 43.747   | 0.003905 | 1.9302   | 30298000 | 0        | 0        | 0        | 30298000 | 0       | 0        | 0       | 1246000 |         |
| Q13137 | Q13137 | Calcium-binding and coiled-coil domain-containing | CALCOCD2   | sp Q13137 | 3  | 3 | 3 | 0 | 2 | 0 | 2  | 0 | 2 | 0 | 2 | 0    | 9.9    | 52.253   | 0.002248 | 3.6956   | 30283000 | 0        | 0        | 0        | 2119600  | 0       | 636230   | 0       | 1036500 |         |
| Q96FC5 | Q96FC5 | Melanoma inhibitory activity protein 2;CTAGE fam  | MIAT2/CTAF | sp Q96FC5 | 5  | 5 | 5 | 0 | 4 | 0 | 4  | 0 | 3 | 0 | 4 | 4.7  | 159.83 | 0        | 6.4301   | 30282000 | 0        | 6422200  | 0        | 2386000  | 0        | 772180  | 0        | 775170  |         |         |
| Q96CN9 | Q96CN9 | GRIP and coiled-coil domain-containing protein 1  | GCC1       | sp Q96CN9 | 2  | 2 | 2 | 1 | 0 | 2 | 0  | 2 | 0 | 2 | 0 | 2    | 3.1    | 87.81    | 0        | 4.3118   | 30192000 | 0        | 4804300  | 0        | 2538800  | 0       | 1041400  |         |         |         |
| P31327 | P31327 | Carbamoyl-phosphate synthase [ammonia], mito      | CP51       | sp P31327 | 4  | 2 | 2 | 1 | 3 | 1 | 3  | 0 | 0 | 2 | 0 | 2    | 2.5    | 164.94   | 0        | 4.1655   | 30050000 | 0        | 1708800  | 0        | 2834200  | 0       | 182550   | 0       | 1133600 |         |
| O9Y6R0 | O9Y6R0 | Numb-like protein 1                               | NUMBL      | sp O9Y6R0 | 1  | 1 | 1 | 1 | 1 | 1 | 1  | 0 | 1 | 1 | 1 | 1    | 2      | 64.891   | 0.001138 | 2.5236   | 30015000 | 0        | 2387700  | 1888800  | 25739000 | 0       | 358980   | 881330  | 1298900 |         |
| Q9UHB7 | Q9UHB7 | AF4/FMR2 family member 4                          | AFF4       | sp Q9UHB7 | 3  | 3 | 3 | 0 | 3 | 0 | 3  | 0 | 3 | 0 | 3 | 0    | 4.2    | 127.46   | 0.00025  | 3.7999   | 29889000 | 0        | 14104000 | 0        | 15785000 | 0       | 1317200  | 0       | 575230  |         |
| P52895 | P52895 | Aldo-keto reductase family 1 member C2            | AKR1C2     | sp P52895 | 7  | 1 | 1 | 0 | 2 | 7 | 0  | 0 | 0 | 0 | 1 | 38.4 | 36.735 | 0.004742 | 1.819    | 29867000 | 0        | 0        | 0        | 29867000 | 0        | 0       | 0        | 1228300 |         |         |
| Q16854 | Q16854 | Deoxyguanosine kinase, mitochondrial              | DGUOK      | sp Q16854 | 1  | 1 | 1 | 0 | 1 | 0 | 1  | 0 | 1 | 0 | 1 | 9    | 32.055 | 0        | 5.5966   | 29827000 | 0        | 5447700  | 0        | 24379000 | 0        | 480210  | 0        | 1002600 |         |         |
| Q12873 | Q12873 | Chromodomain-helicase-DNA-binding protein 3       | CHD3       | sp Q12873 | 10 | 2 | 2 | 1 | 9 | 5 | 7  | 1 | 1 | 1 | 1 | 6.6  | 226.59 | 0.00846  | 1.608    | 29809000 | 2943500  | 1084000  | 1080100  | 14945000 | 0        | 955600  | 0        | 614630  |         |         |
| P53350 | P53350 | Serine/threonine-protein kinase PLK1              | PLK1       | sp P53350 | 2  | 2 | 2 | 0 | 1 | 2 | 2  | 0 | 1 | 2 | 2 | 5    | 68.254 | 0        | 4.17     | 29744000 | 0        | 4207900  | 2390200  | 23146000 | 0        | 500480  | 1528500  | 900090  |         |         |
| Q8TAP6 | Q8TAP6 | Centrosomal protein of 76 kDa                     | CEP76      | sp Q8TAP6 | 1  | 1 | 1 | 1 | 0 | 0 | 1  | 0 | 0 | 1 | 0 | 1.2  | 74.413 | 0.007035 | 1.7018   | 29737000 | 29737000 | 0        | 0        | 0        | 29737000 | 0       | 0        | 0       | 0       |         |
| Q96GM8 | Q96GM8 | Target of EGR1 protein 1                          | TOE1       | sp Q96GM8 | 1  | 1 | 1 | 1 | 1 | 1 | 1  | 1 | 1 | 1 | 1 | 1.6  | 56.547 | 0.004536 | 1.8462   | 29653000 | 0        | 11152000 | 1314700  | 17186000 | 0        | 983070  | 883470   | 706780  |         |         |
| Q5R314 | Q5R314 | Tetrapeptide repeat protein 38                    | TT38       | sp Q5R314 | 3  | 3 | 3 | 0 | 3 | 0 | 3  | 0 | 3 | 0 | 3 | 6.6  | 52.787 | 0        | 8.7592   | 29638000 | 0        | 22489000 | 0        | 7148500  | 0        | 1802100 | 0        | 474290  |         |         |
| O43657 | O43657 | Tetraspanin-6                                     | TSPAN6     | sp O43657 | 2  | 2 | 2 | 0 | 2 | 0 | 2  | 0 | 2 | 0 | 2 | 7.8  | 27.563 | 0.001569 | 2.3408   | 29599000 | 0        | 22423000 | 0        | 7166900  | 0        | 1370600 | 0        | 540720  |         |         |
| Q8WUK0 | Q8WUK0 | Phosphatidylglycerophosphatase and protein-tyr    | PTPM11     | sp Q8WUK0 | 2  | 2 | 2 | 0 | 2 | 0 | 2  | 0 | 2 | 0 | 2 | 12.4 | 22.843 | 0        | 5.476    | 29538000 | 0        | 12129000 | 0        | 8309000  | 0        | 1871300 | 0        | 0       |         |         |
| Q6ZVY5 | Q6ZVY5 | Transmembrane and TPR repeat-containing prot      | TMT3C      | sp Q6ZVY5 | 1  | 1 | 1 | 0 | 1 | 0 | 1  | 0 | 1 | 0 | 1 | 1.1  | 104.01 | 0.004738 | 1.8117   | 29446000 | 0        | 5107900  | 0        | 24339000 | 0        | 450260  | 0        | 1000900 |         |         |
| Q86X83 | Q86X83 | COVII domain-containing protein 2                 | COMMD2     | sp Q86X83 | 1  | 1 | 1 | 0 | 1 | 0 | 1  | 0 | 1 | 0 | 1 | 3.5  | 22.745 | 0.003904 | 1.9276   | 29369000 | 0        | 9557100  | 0        | 19812000 | 0        | 842450  | 0        | 814780  |         |         |
| Q95786 | Q95786 | Probable ATP-dependent RNA helicase DDX58         | DDX58      | sp Q95786 | 3  | 3 | 3 | 0 | 3 | 0 | 3  | 0 | 3 | 0 | 3 | 4    | 106.66 | 0        | 7.096    | 29355000 | 0        | 0        | 0        | 29355000 | 0        | 0       | 0        | 1207700 |         |         |
| P41223 | P41223 | Protein BUD31 homolog                             | BUD31      | sp P41223 | 2  | 2 | 2 | 0 | 1 | 0 | 1  | 0 | 1 | 0 | 2 | 12.5 | 17     | 0        | 4.0055   | 29354000 | 0        | 22057000 | 0        | 0        | 0        | 7797200 | 0        | 0       | 0       | 3001100 |
| Q6ZM23 | Q6ZM23 | Nesprin-3                                         | SYNE3      | sp Q6ZM23 | 1  | 1 | 1 | 0 | 0 | 1 | 0  | 0 | 1 | 0 | 1 | 1.1  | 112.22 | 0.002047 | 3.6672   | 29347000 | 0        | 0        | 0        | 29347000 | 0        | 0       | 0        | 1206900 |         |         |
| Q6ZS25 | Q6ZS25 | Rho guanine nucleotide exchange factor 18         | ARHGEF18   | sp Q6ZS25 | 1  | 1 | 1 | 0 | 1 | 0 | 1  | 0 | 1 | 0 | 1 | 0.5  | 151.64 | 0.003078 | 2.0958   | 29240000 | 0        | 3063400  | 0        | 26177000 | 0        | 270040  | 0        | 1076500 |         |         |
| Q9H413 | Q9H413 | TRAB domain-containing protein                    | TRABD      | sp Q9H413 | 2  | 2 | 2 | 0 | 2 | 0 | 2  | 0 | 2 | 0 | 2 | 5.9  | 42.321 | 0        | 4.4725   | 29063000 | 0        | 8227900  | 0        | 20835000 | 0        | 713640  | 0        | 868500  |         |         |
| Q15750 | Q15750 | TGF-beta-activated kinase 1 and MAP3K7-binding    | TAB1       | sp Q15750 | 4  | 4 | 4 | 0 | 3 | 0 | 3  | 0 | 3 | 0 | 3 | 2    | 11.1   | 54.643   | 0        | 14.588   | 29053000 | 0        | 12189000 | 0        | 7763400  | 0       | 1876600  | 0       | 0       |         |
| Q32P44 | Q32P44 | Echinoderm microtubule-associated protein-like    | EML3       | sp Q32P44 | 3  | 3 | 3 | 0 | 0 | 3 | 0  | 0 | 3 | 0 | 3 | 4.5  | 95.196 | 0        | 10.124   | 29011000 | 0        | 0        | 0        | 29011000 | 0        | 0       | 0        | 1193100 |         |         |
| Q726K3 | Q726K3 | Protein prenyltransferase alpha subunit repeat-c  | PTAR1      | sp Q726K3 | 1  | 1 | 1 | 0 | 1 | 0 | 1  | 0 | 1 | 0 | 1 | 2.5  | 46.405 | 0.009664 | 1.5364   | 28885000 | 0        | 13873000 | 0        | 15012000 | 0        | 1222900 | 0        | 617380  |         |         |
| O60563 | O60563 | Cyclin-1                                          | CNT1       | sp O60563 | 3  | 3 | 3 | 1 | 0 | 3 | 1  | 0 | 3 | 1 | 0 | 6.6  | 80.684 | 0        | 5.7069   | 28868000 | 0        | 24387000 | 4480600  | 0        | 1891200  | 3269400 | 0        | 0       |         |         |
| O60282 | O60282 | Kinesin heavy chain isoform 5C                    | KIF5C      | sp O60282 | 10 | 3 | 3 | 0 | 6 | 5 | 10 | 0 | 0 | 3 | 0 | 3    | 14.5   | 109.49   | 0        | 13.073   | 28848000 | 0        | 0        | 0        | 28848000 | 0       | 0        | 0       | 1186400 |         |
| Q9NXCS | Q9NXCS | WD repeat-containing protein mio                  | MIOS       | sp Q9NXCS | 4  | 4 | 4 | 0 | 3 | 0 | 3  | 0 | 3 | 0 | 3 | 5.6  | 98.583 | 0        | 8.5522   | 28767000 | 0        | 16150000 | 0        | 12616000 | 0        | 998920  | 0        | 943570  |         |         |
| Q9H0H0 | Q9H0H0 | Integrator complex subunit 2                      | INTS2      | sp Q9H0H0 | 1  | 1 | 1 | 0 | 0 | 1 | 0  | 0 | 1 | 0 | 1 | 1    | 134.32 | 0.002048 | 3.7136   | 28707000 | 0        | 0        | 0        | 28707000 | 0        | 0       | 0        | 1180600 |         |         |
| Q6PL24 | Q6PL24 | Protein TMED8                                     | TMED8      | sp Q6PL24 | 2  | 2 | 2 | 0 | 2 | 0 | 2  | 0 | 2 | 0 | 2 | 10.8 | 35.74  | 0        | 3.8942   | 28510000 | 0        | 28510000 | 0        | 0        | 0        | 2513100 | 0        | 0       |         |         |
| Q5BHJ7 | Q5BHJ7 | Protein YIF1B                                     | YIF1B      | sp Q5BHJ7 | 1  | 1 | 1 | 0 | 1 | 0 | 1  | 0 | 1 | 0 | 1 | 7.6  | 34.435 | 0        | 5.1848   | 28477000 | 0        | 10252000 | 0        | 18226000 | 0        | 903690  | 0        | 749540  |         |         |
| Q9H423 | Q9H423 | Phosphorylated CTD-interacting factor 1           | PCIF1      | sp Q9H423 | 2  | 2 | 2 | 0 | 2 | 0 | 2  | 0 | 2 | 0 | 2 | 4.5  | 80.669 | 0        | 4.5863   | 28401000 | 0        | 10576000 | 0        | 17826000 | 0        | 928800  | 0        | 736530  |         |         |
| Q13107 | Q13107 | Ubiquitin carboxyl-terminal hydrolase 4           | USP4       | sp Q13107 | 4  | 4 | 4 | 0 | 2 | 0 | 2  | 0 | 2 | 0 | 2 | 3.5  | 106.56 | 0        | 5.5045   | 28392000 | 0        | 0        | 0        | 28392000 | 0        | 0       | 0        | 1167600 |         |         |
| P48750 | P48750 | Ranin-binding lectin serine protease 1;Mannan     | MASP1      | sp P48750 | 2  | 2 | 2 | 0 | 4 | 0 | 4  | 0 | 4 | 0 | 4 | 8.7  | 79.246 | 0        | 9.5659   | 28316000 | 0        | 0        | 28336000 | 0        | 0        | 0       | 19041000 | 0       |         |         |
| Q08253 | Q08253 | 72 kDa type IV collagenase;PEX                    | MMP2       | sp Q08253 | 1  | 1 | 1 | 0 | 0 | 1 | 0  | 0 | 1 | 0 | 1 | 1.8  | 73.881 | 0.000722 | 3.73555  | 28316000 | 0        | 0        | 0        | 28316000 | 0        | 0       | 0        | 1164500 |         |         |
| Q9UDX5 | Q9UDX5 | Mitochondrial fission process protein 1           | MIFP1      | sp Q9UDX5 | 1  | 1 | 1 | 0 | 1 | 0 | 1  | 0 | 1 | 0 | 1 | 6.6  | 18.01  | 0.001166 | 2.9047   | 28250000 | 0        | 11089000 | 0        | 17316000 | 0        | 977510  | 0        | 705750  |         |         |
| O95425 | O95425 | Supervillin                                       | SVIL       | sp O95425 | 4  | 4 | 4 | 0 | 4 | 1 | 0  | 0 | 4 | 1 | 0 | 2.2  | 247.74 | 0        | 9.1843   | 28220000 | 0        | 0        | 15426000 | 12795000 | 0        | 9992600 | 889540   | 0       |         |         |
| Q14249 | Q14249 | Endonuclease G, mitochondrial                     | ENDOG      | sp Q14249 | 1  | 1 | 1 | 0 | 0 | 1 | 0  | 0 | 1 | 0 | 0 | 5.7  | 32.62  | 0.002045 | 3.59     | 28170000 | 0        | 0        | 0        | 28170000 | 0        | 0       | 0        | 1158500 |         |         |
| Q9NPF5 | Q9NPF5 | DNA methyltransferase 1-associated protein 1      | DMAA1      | sp Q9NPF5 | 3  | 3 | 3 | 0 | 2 | 0 | 2  | 0 | 2 | 0 | 1 | 10.5 | 52.992 | 0        | 6.2435   | 28150000 | 0        | 28150000 | 0        | 0        | 0        | 2481400 | 0        | 0       |         |         |
| Q43808 | Q43808 | Peroxisomal membrane protein PMP34                | SLC25A17   | sp Q43808 | 1  | 1 | 1 | 0 | 1 | 0 | 1  | 0 | 1 | 0 | 1 | 5.9  | 34.566 | 0        | 4.1378   | 28149000 | 0        | 12278000 | 0        | 15872000 | 0        | 1082300 | 0        | 652730  |         |         |
| A2A3N6 | A2A3N6 | Putative PIP5K1A and PSM4D-like protein           | PIPSL      | sp A2A3N6 | 5  | 1 | 1 | 0 | 4 | 5 | 5  | 0 | 1 | 1 | 0 | 6    | 95.047 |          |          |          |          |          |          |          |          |         |          |         |         |         |

|           |           |                                                  |            |           |   |   |   |   |   |   |   |   |   |   |   |   |      |        |          |          |          |          |          |          |          |          |         |          |         |         |        |        |
|-----------|-----------|--------------------------------------------------|------------|-----------|---|---|---|---|---|---|---|---|---|---|---|---|------|--------|----------|----------|----------|----------|----------|----------|----------|----------|---------|----------|---------|---------|--------|--------|
| Q5U5X0    | Q5U5X0    | Complex III assembly factor LYRM7                | LYRM7      | sj Q5U5X0 | 2 | 2 | 2 | 0 | 1 | 0 | 1 | 0 | 1 | 0 | 1 | 0 | 1    | 24     | 11.955   | 0        | 5.6615   | 25981000 | 0        | 25981000 | 0        | 0        | 0       | 2290200  | 0       | 157070  |        |        |
| P42695    | P42695    | Condensin-2 complex subunit D3                   | NCAPD3     | sj P42695 | 2 | 2 | 2 | 0 | 2 | 1 | 2 | 0 | 2 | 1 | 2 | 1 | 2    | 1.4    | 168.89   | 0        | 10.093   | 25944000 | 0        | 6579300  | 2132600  | 17323000 | 0       | 1131600  | 0       | 1066500 |        |        |
| Q9UL03    | Q9UL03    | Integrator complex subunit 6                     | INTS6      | sj Q9UL03 | 1 | 1 | 1 | 0 | 0 | 0 | 0 | 0 | 0 | 0 | 0 | 0 | 1    | 1.7    | 100.39   | 0.001348 | 2.377    | 25934000 | 0        | 0        | 0        | 25934000 | 0       | 0        | 0       | 1066500 |        |        |
| O14672    | O14672    | Disintegrin and metalloproteinase domain-contain | ADAM10     | sj O14672 | 1 | 1 | 1 | 0 | 0 | 1 | 0 | 1 | 0 | 1 | 0 | 1 | 2    | 2      | 84.141   | 0.001564 | 2.2827   | 25865000 | 0        | 6359500  | 0        | 19505000 | 0       | 560800   | 0       | 802160  |        |        |
| P55789    | P55789    | FAD-linked sulphydryl oxidase ALR                | GFER       | sj P55789 | 3 | 3 | 3 | 0 | 0 | 0 | 0 | 0 | 0 | 0 | 0 | 0 | 0    | 18.5   | 23.449   | 0        | 9.4418   | 25842000 | 0        | 25842000 | 0        | 0        | 0       | 2277900  | 0       | 0       |        |        |
| Q15025    | Q15025    | TNFAIP3-interacting protein 1                    | TNIP1      | sj Q15025 | 2 | 2 | 2 | 1 | 1 | 1 | 2 | 0 | 1 | 1 | 2 | 1 | 2    | 4.1    | 71.863   | 0        | 6.2478   | 25808000 | 0        | 6278400  | 1560700  | 17969000 | 0       | 722650   | 994810  | 623750  |        |        |
| O95758    | O95758    | Polypyrimidine tract-binding protein 3           | PTBP3      | sj O95758 | 1 | 1 | 1 | 1 | 1 | 2 | 0 | 0 | 1 | 1 | 0 | 0 | 1    | 7.6    | 59.689   | 0.000485 | 3.4323   | 25759000 | 0        | 0        | 2576800  | 23182000 | 0       | 41       | 0       | 953390  |        |        |
| Q5T009    | Q5T009    | Tumor protein p63-regulated gene l-like protein  | TPRGL1     | sj Q5T009 | 2 | 2 | 2 | 0 | 0 | 0 | 0 | 0 | 0 | 0 | 0 | 0 | 2    | 16.9   | 30.211   | 0        | 6.2229   | 25756000 | 0        | 0        | 0        | 25756000 | 0       | 0        | 0       | 1059200 |        |        |
| O00754    | O00754    | Lysosomal alpha-mannosidase;Lysosomal alpha-m    | MAN2B1     | sj O00754 | 1 | 1 | 1 | 0 | 0 | 0 | 0 | 0 | 0 | 0 | 0 | 0 | 0    | 1.5    | 113.74   | 0        | 4.7819   | 25628000 | 0        | 25628000 | 0        | 0        | 0       | 2259100  | 0       | 0       |        |        |
| P08922    | P08922    | Proto-oncogene tyrosine-protein kinase ROS       | ROS1       | sj P08922 | 1 | 1 | 1 | 0 | 0 | 0 | 1 | 0 | 0 | 0 | 0 | 0 | 1    | 0.5    | 263.91   | 0.006424 | 1.7422   | 25567000 | 0        | 0        | 0        | 25567000 | 0       | 0        | 0       | 1051500 |        |        |
| P31323    | P31323    | GAMP-dependent protein kinase type II-beta regu  | PRKAR2B    | sj P31323 | 4 | 4 | 4 | 0 | 0 | 0 | 0 | 0 | 0 | 0 | 0 | 0 | 1    | 15.3   | 46.302   | 0        | 3.9218   | 25557000 | 0        | 0        | 25567000 | 0        | 0       | 0        | 2253700 | 0       | 0      |        |
| Q9NSY1    | Q9NSY1    | BMP-2-inducible protein kinase                   | BMP2K      | sj Q9NSY1 | 2 | 2 | 2 | 0 | 0 | 0 | 0 | 0 | 0 | 0 | 0 | 0 | 2    | 2.3    | 129.17   | 0        | 4.6159   | 25489000 | 0        | 0        | 0        | 25489000 | 0       | 0        | 0       | 1048300 |        |        |
| Q9NW86    | Q9NW86    | Arginine and glutamate-rich protein 1            | ARGLU1     | sj Q9NW86 | 3 | 3 | 3 | 1 | 2 | 1 | 0 | 1 | 2 | 1 | 0 | 1 | 2    | 8.4    | 33.216   | 0        | 4.9981   | 25454000 | 1123600  | 20428000 | 3903000  | 0        | 1500800 | 1423500  | 0       | 0       |        |        |
| O95834    | O95834    | Echinoderm microtubule-associated protein-like   | EML2       | sj O95834 | 3 | 3 | 3 | 0 | 0 | 0 | 3 | 0 | 2 | 0 | 0 | 0 | 3    | 5.4    | 70.678   | 0        | 6.0759   | 25433000 | 0        | 4581700  | 0        | 20851000 | 0       | 470750   | 0       | 790620  |        |        |
| Q9BRT6    | Q9BRT6    | Protein LLP homolog                              | LLPH       | sj Q9BRT6 | 1 | 1 | 1 | 0 | 1 | 1 | 1 | 0 | 1 | 1 | 1 | 1 | 1    | 10.9   | 15.225   | 0.003079 | 2.0962   | 25412000 | 0        | 7097700  | 3176300  | 15138000 | 0       | 625660   | 2134400 | 622570  |        |        |
| Q9H784    | Q9H784    | Histone-lysine N-methyltransferase SMYD3         | SMYD3      | sj Q9H784 | 2 | 2 | 2 | 0 | 0 | 2 | 0 | 2 | 0 | 2 | 0 | 2 | 2    | 6.5    | 49.097   | 0.00287  | 2.1345   | 25323000 | 0        | 8904000  | 0        | 16419000 | 0       | 795580   | 0       | 664550  |        |        |
| Q9BU6E    | Q9BU6E    | Iron-sulfur cluster assembly 1 homolog, mitochon | ISCA1      | sj Q9BU6E | 1 | 1 | 1 | 0 | 1 | 0 | 1 | 0 | 1 | 0 | 1 | 0 | 1    | 9.3    | 14.179   | 0.000487 | 3.4823   | 25320000 | 0        | 6120600  | 0        | 19199000 | 0       | 539530   | 0       | 789570  |        |        |
| Q99504    | Q99504    | Eyes absent homolog 3                            | EYA3       | sj Q99504 | 3 | 3 | 3 | 0 | 2 | 0 | 1 | 0 | 2 | 0 | 1 | 0 | 1    | 8      | 62.662   | 0.000247 | 3.6623   | 25258000 | 0        | 18886000 | 0        | 0        | 0       | 6372200  | 0       | 0       |        |        |
| Q96QU8    | Q96QU8    | Exportin-6                                       | XPO6       | sj Q96QU8 | 1 | 1 | 1 | 0 | 1 | 0 | 1 | 0 | 1 | 0 | 1 | 0 | 1    | 1      | 128.88   | 0        | 5.1181   | 25244000 | 0        | 4431800  | 0        | 20812000 | 0       | 390660   | 0       | 855910  |        |        |
| Q7ZK3     | Q7ZK3     | Pogo transposable element with ZNF domain        | POGZ       | sj Q7ZK3  | 2 | 2 | 2 | 1 | 1 | 0 | 1 | 0 | 1 | 0 | 2 | 1 | 1    | 2.3    | 155.34   | 0        | 4.4897   | 25174000 | 0        | 10397000 | 947110   | 13830000 | 0       | 953730   | 600380  | 567560  |        |        |
| P49711;Q8 | P49711;Q8 | Transcriptional repressor CTCF;Transcriptional r | CTCF;CTCF  | sj P49711 | 2 | 2 | 2 | 0 | 2 | 2 | 0 | 2 | 2 | 0 | 2 | 2 | 0    | 5.4    | 82.785   | 0        | 5.1067   | 25108000 | 0        | 14989000 | 10119000 | 0        | 0       | 0        | 1189600 | 6931600 | 0      |        |
| P53611    | P53611    | Geranylgeranyl transferase type-2 subunit beta   | RABGGTB    | sj P53611 | 0 | 0 | 0 | 0 | 0 | 0 | 0 | 0 | 0 | 0 | 0 | 0 | 2    | 3.3    | 36.924   | 0.000248 | 3.7001   | 25101000 | 0        | 1884900  | 0        | 23216000 | 0       | 468580   | 0       | 652350  |        |        |
| Q96AA3    | Q96AA3    | Protein RFT1 homolog                             | RFT1       | sj Q96AA3 | 2 | 2 | 2 | 0 | 0 | 2 | 0 | 0 | 2 | 0 | 0 | 0 | 2    | 4.3    | 60.335   | 0.000721 | 3.3349   | 25089000 | 0        | 6178400  | 0        | 0        | 0       | 834860   | 0       | 487470  |        |        |
| P43007    | P43007    | Neutral amino acid transporter A                 | SLC14A4    | sj P43007 | 1 | 1 | 1 | 0 | 1 | 0 | 1 | 0 | 1 | 0 | 1 | 0 | 1    | 5.1    | 55.722   | 0.000247 | 3.6669   | 25076000 | 0        | 12102000 | 0        | 12974000 | 0       | 1066800  | 0       | 533550  |        |        |
| O95295    | O95295    | SNARE-associated protein Snapin                  | SNAPIN     | sj O95295 | 2 | 2 | 2 | 0 | 2 | 0 | 2 | 0 | 2 | 0 | 2 | 0 | 2    | 22.8   | 14.874   | 0        | 11.46    | 25024000 | 0        | 18671000 | 0        | 6352900  | 0       | 1644900  | 0       | 442240  |        |        |
| Q96F63    | Q96F63    | Coiled-coil domain-containing protein 97         | CCDC37     | sj Q96F63 | 2 | 2 | 2 | 0 | 2 | 0 | 0 | 0 | 0 | 0 | 0 | 0 | 7.6  | 38.946 | 0        | 7.1465   | 25004000 | 0        | 25004000 | 0        | 0        | 0        | 2284100 | 0        | 0       |         |        |        |
| Q8X18     | Q8X18     | Probable ATP-dependent RNA helicase DHX40        | DHX40      | sj Q8X18  | 1 | 1 | 1 | 0 | 1 | 0 | 1 | 0 | 1 | 0 | 1 | 0 | 1    | 1.5    | 88.559   | 0.001177 | 3.0577   | 24940000 | 0        | 5541800  | 0        | 19398000 | 0       | 488510   | 0       | 797740  |        |        |
| O95985    | O95985    | DNA topoisomerase- $\beta$ beta-1                | TOP3B      | sj O95985 | 3 | 3 | 3 | 2 | 2 | 1 | 2 | 2 | 2 | 1 | 2 | 2 | 1    | 4.8    | 96.661   | 0        | 7.6872   | 24893000 | 1068000  | 8251800  | 1616400  | 13957000 | 1126300 | 642330   | 1261400 | 425580  |        |        |
| O9Y605    | O9Y605    | MORF4 family-associated protein 1                | MRFAP1     | sj O9Y605 | 1 | 1 | 1 | 0 | 1 | 0 | 1 | 0 | 1 | 0 | 1 | 0 | 1    | 18.9   | 14.649   | 0        | 7.3817   | 24831000 | 0        | 9339600  | 0        | 15491000 | 0       | 832380   | 0       | 637090  |        |        |
| Q96LB3    | Q96LB3    | Intraflagellar transport protein 74 homolog      | IFT74      | sj Q96LB3 | 2 | 2 | 2 | 0 | 2 | 0 | 2 | 0 | 2 | 0 | 2 | 0 | 1    | 4.7    | 69.239   | 0        | 4.3803   | 24819000 | 0        | 15796000 | 0        | 9022600  | 0       | 902980   | 0       | 860510  |        |        |
| P13987    | P13987    | CD59 glycoprotein                                | CD59       | sj P13987 | 1 | 1 | 1 | 0 | 0 | 1 | 0 | 0 | 1 | 0 | 0 | 1 | 1    | 6.2    | 14.177   | 0.003905 | 1.9317   | 24812000 | 0        | 0        | 1591300  | 23220000 | 0       | 0        | 0       | 1069400 | 954960 |        |
| Q9UN51    | Q9UN51    | Protein timeless homolog                         | TIMELESS   | sj Q9UN51 | 4 | 4 | 4 | 0 | 3 | 1 | 2 | 0 | 3 | 1 | 2 | 0 | 4    | 4.6    | 138.66   | 0        | 6.8977   | 24792000 | 0        | 6216100  | 1918800  | 16657000 | 0       | 718710   | 1102500 | 701150  |        |        |
| P38935    | P38935    | DNA-binding protein SMUBP-2                      | IGHMBP2    | sj P38935 | 2 | 2 | 2 | 1 | 1 | 2 | 2 | 1 | 2 | 2 | 1 | 2 | 2    | 2.9    | 109.15   | 0.000715 | 3.244    | 24697000 | 1324700  | 5128200  | 6321400  | 11923000 | 965030  | 563740   | 4030400 | 482850  |        |        |
| Q96T60    | Q96T60    | Bifunctional polyucleotide phosphatase/kinase    | PNKP       | sj Q96T60 | 2 | 2 | 2 | 0 | 1 | 0 | 2 | 0 | 0 | 1 | 0 | 2 | 0    | 6.3    | 57.076   | 0        | 4.8338   | 24690000 | 0        | 5438200  | 0        | 19252000 | 0       | 641450   | 0       | 629860  |        |        |
| Q92925    | Q92925    | SWI/SNF-related matrix-associated actin-depend   | SMARCD2    | sj Q92925 | 1 | 1 | 1 | 0 | 1 | 1 | 2 | 0 | 1 | 1 | 2 | 0 | 2    | 6.2    | 58.92    | 0        | 3.9343   | 24662000 | 0        | 4817000  | 878070   | 18967000 | 0       | 676220   | 640190  | 478290  |        |        |
| Q58FG1    | Q58FG1    | Putative heat shock protein HSP 90-alpha A4      | HSP90AAA4  | sj Q58FG1 | 2 | 2 | 2 | 1 | 1 | 2 | 1 | 2 | 1 | 0 | 1 | 0 | 1    | 5.3    | 47.711   | 0.001161 | 2.829    | 24588000 | 0        | 9909700  | 0        | 14678000 | 0       | 873530   | 0       | 603630  |        |        |
| Q8X11     | Q8X11     | Mitochondrial Rho GTPase 2                       | RHOT2      | sj Q8X11  | 2 | 2 | 2 | 0 | 0 | 1 | 0 | 1 | 0 | 1 | 0 | 1 | 0    | 4.2    | 68.117   | 0        | 5.1668   | 24556000 | 0        | 10489000 | 0        | 0        | 0       | 0        | 578530  | 0       | 0      |        |
| Q13286    | Q13286    | Battenin                                         | CLN3       | sj Q13286 | 1 | 1 | 1 | 0 | 0 | 0 | 0 | 1 | 0 | 0 | 1 | 0 | 1    | 3.4    | 47.622   | 0.001159 | 2.7908   | 24456000 | 0        | 0        | 0        | 24456000 | 0       | 0        | 0       | 1005800 |        |        |
| Q9NUD5    | Q9NUD5    | Zinc finger CCHC domain-containing protein 3     | ZCCHC3     | sj Q9NUD5 | 2 | 2 | 2 | 0 | 2 | 0 | 2 | 0 | 2 | 0 | 2 | 0 | 11.7 | 43.547 | 0.000718 | 3.2937   | 24411000 | 0        | 0        | 0        | 0        | 0        | 2151800 | 0        | 0       |         |        |        |
| O43426    | O43426    | Synaptotagmin-1                                  | SYN1       | sj O43426 | 2 | 2 | 2 | 0 | 0 | 0 | 0 | 0 | 0 | 0 | 0 | 0 | 2    | 1.8    | 173.1    | 0        | 5.1284   | 24352000 | 0        | 0        | 0        | 24352000 | 0       | 0        | 0       | 1001500 |        |        |
| Q99808    | Q99808    | Equilibrative nucleoside transporter 1           | SLC29A1    | sj Q99808 | 1 | 1 | 1 | 0 | 1 | 0 | 1 | 0 | 1 | 0 | 1 | 0 | 1    | 2      | 50.219   | 0.003275 | 2.0257   | 24349000 | 0        | 11242000 | 0        | 0        | 0       | 13107000 | 0       | 990960  | 0      | 539030 |
| O14757    | O14757    | Serine/threonine-protein kinase Chk1             | CHK1       | sj O14757 | 2 | 2 | 2 | 0 | 2 | 0 | 2 | 0 | 2 | 0 | 2 | 0 | 2    | 5.7    | 54.433   | 0.000489 | 3.5329   | 24254000 | 0        | 12013000 | 0        | 12241000 | 0       | 984910   | 0       | 574770  |        |        |
| Q75448    | Q75448    | Mediator of RNA polymerase II transcription subu | MEZ24      | sj Q75448 | 1 | 1 | 1 | 0 | 0 | 1 | 1 | 0 | 0 | 1 | 0 | 1 | 1    | 1.6    | 110.33   | 0        | 6.1714   | 24235000 | 0        | 0        | 438340   | 23797000 | 0       | 0        | 0       | 294560  | 978660 |        |
| Q9BWE0    | Q9BWE0    | Replication initiator 1                          | REPIN1     | sj Q9BWE0 | 3 | 3 | 3 | 0 | 3 | 1 | 3 | 0 | 3 | 1 | 3 | 0 | 3    | 7.4    | 63.574   | 0.000488 | 3.5152   | 24230000 | 0        | 11513000 | 1610100  | 11105000 | 0       | 745740   | 1520000 | 387550  |        |        |
| P01116    | P01116    | GTPase KRas;GTPase KRas, N-terminally proces     | KRAS       | sj P01116 | 4 | 4 | 4 | 1 | 0 | 3 | 0 | 4 | 0 | 0 | 0 | 1 | 1    | 28     | 215.65   | 0.002663 | 2.1899   | 24201000 | 0        | 0        | 0        | 24201000 | 0       | 0        | 0       | 995230  | 80     |        |
| Q9ULL8;Q  | Q9ULL8;Q  | Calcium-dependent secretion activator 1;Calcium  | CADPS5;CAI | sj Q9ULL8 | 2 | 2 | 2 | 0 | 0 | 0 | 0 | 0 | 0 | 0 | 0 | 0 | 2    | 2.4    | 152.78   | 0        | 7.5391   | 24137000 | 0        | 0        | 0        | 24137000 | 0       | 0        | 0       | 992660  |        |        |
| Q13901    | Q13901    | Nuclear nucleic acid-binding protein CID         | CID        | sj Q13901 | 1 | 1 | 1 | 0 | 1 | 0 | 1 | 0 | 1 | 0 | 1 | 0 | 1    | 7.1    | 16.019   | 0.001139 | 2.5576   | 24134000 | 0        | 14579000 | 0        | 9555900  | 0       | 1348700  | 0       | 329400  |        |        |
| Q05707    | Q05707    | Collagen alpha-1(XIV) chain                      | COL14      |           |   |   |   |   |   |   |   |   |   |   |   |   |      |        |          |          |          |          |          |          |          |          |         |          |         |         |        |        |



|           |           |                                                    |               |           |    |   |   |   |   |    |    |   |   |   |   |   |   |   |        |          |          |          |          |          |          |          |          |          |          |         |          |         |         |   |        |   |
|-----------|-----------|----------------------------------------------------|---------------|-----------|----|---|---|---|---|----|----|---|---|---|---|---|---|---|--------|----------|----------|----------|----------|----------|----------|----------|----------|----------|----------|---------|----------|---------|---------|---|--------|---|
| P55212    | P55212    | Caspase-6;Caspase-6 subunit p18;Caspase-6 subu     | CASP6         | sp P55212 | 2  | 2 | 2 | 0 | 1 | 0  | 2  | 0 | 1 | 0 | 2 | 0 | 1 | 0 | 2      | 6.5      | 33.31    | 0.001166 | 2.9048   | 22152000 | 0        | 8099200  | 0        | 14053000 | 0        | 898790  | 0        | 393080  |         |   |        |   |
| C9JLW8    | C9JLW8    | Protein FAM195B                                    | FAM195B       | sp C9JLW8 | 2  | 2 | 2 | 1 | 2 | 0  | 0  | 1 | 2 | 0 | 0 | 0 | 1 | 2 | 0      | 29.9     | 10.92    | 0        | 4.0315   | 22111000 | 1739100  | 20372000 | 0        | 2200600  | 0        | 1334200 | 0        | 0       |         |   |        |   |
| O15047    | O15047    | Histone-lysine N-methyltransferase SETD1A          | SETD1A        | sp O15047 | 2  | 2 | 2 | 0 | 2 | 0  | 0  | 1 | 2 | 0 | 0 | 1 | 2 | 0 | 1      | 1.8      | 186.03   | 0        | 5.0242   | 22052000 | 0        | 16549000 | 0        | 5503400  | 0        | 1296500 | 0        | 388580  |         |   |        |   |
| Q9H4K7    | Q9H4K7    | Mitochondrial ribosome-associated GTPase 2         | MTG2          | sp Q9H4K7 | 3  | 3 | 3 | 0 | 3 | 2  | 0  | 0 | 3 | 2 | 0 | 0 | 3 | 2 | 0      | 9.1      | 43.955   | 0        | 6.0428   | 22044000 | 0        | 0        | 0        | 11791000 | 10253000 | 0       | 0        | 7595100 | 749910  |   |        |   |
| N81810    | Q8NB80    | Sterile alpha motif domain-containing protein 12   | SAMD12        | sp Q8NB80 | 3  | 3 | 3 | 0 | 1 | 1  | 0  | 1 | 1 | 1 | 0 | 1 | 1 | 1 | 4      | 22.906   | 0.009839 | 1.507    | 22041000 | 0        | 1189000  | 4019100  | 16833000 | 0        | 382740   | 0       | 1942900  | 1172300 | 0       |   |        |   |
| Q8NBM4    | Q8NBM4    | Ubiquitin-associated domain-containing protein 2   | UBAC2         | sp Q8NBM4 | 2  | 2 | 2 | 0 | 1 | 1  | 2  | 0 | 1 | 1 | 2 | 0 | 1 | 1 | 2      | 7.6      | 38.963   | 0.001165 | 2.8947   | 22016000 | 0        | 7011400  | 1108200  | 13896000 | 0        | 617020  | 0        | 702150  | 615900  | 0 |        |   |
| Q96RT1    | Q96RT1    | Protein LAP2                                       | ERBB2IP       | sp Q96RT1 | 2  | 2 | 2 | 0 | 2 | 0  | 0  | 0 | 2 | 0 | 0 | 0 | 2 | 2 | 2.1    | 158.3    | 0.001564 | 2.279    | 21973000 | 0        | 0        | 0        | 21973000 | 0        | 0        | 0       | 0        | 903650  | 0       |   |        |   |
| Q95363    | Q95363    | Phenylalanine-tRNA ligase, mitochondrial           | FARS2         | sp Q95363 | 1  | 1 | 1 | 0 | 1 | 0  | 1  | 0 | 1 | 0 | 1 | 0 | 1 | 0 | 1      | 2.7      | 52.356   | 0.009658 | 1.5327   | 21823000 | 0        | 12603000 | 0        | 9220100  | 0        | 0       | 0        | 379180  | 0       |   |        |   |
| Q8JZAO    | Q8JZAO    | Dyslexia-associated protein KIAA0319L-like protein | KIAA0319L     | sp Q8JZAO | 2  | 2 | 2 | 0 | 2 | 0  | 1  | 0 | 2 | 0 | 1 | 0 | 1 | 0 | 1      | 1.6      | 115.66   | 0.008457 | 1.6075   | 21793000 | 0        | 8544400  | 0        | 13249000 | 0        | 590130  | 0        | 707910  | 0       | 0 |        |   |
| P57764    | P57764    | Gas2L3 domain D                                    | GS2L3         | sp P57764 | 2  | 2 | 2 | 0 | 0 | 0  | 0  | 2 | 0 | 0 | 0 | 2 | 0 | 0 | 2      | 5.6      | 52.8     | 0        | 8.5524   | 21789000 | 0        | 0        | 0        | 0        | 0        | 0       | 0        | 0       | 895100  | 0 |        |   |
| Q4U2B6    | Q4U2B6    | 3S5 ribosomal protein L51, mitochondrial           | MRL51         | sp Q4U2B6 | 1  | 1 | 1 | 0 | 0 | 0  | 0  | 1 | 0 | 0 | 0 | 1 | 0 | 0 | 1      | 9.4      | 15.095   | 0.000249 | 3.7434   | 21771000 | 0        | 0        | 0        | 21771000 | 0        | 0       | 0        | 0       | 895360  | 0 |        |   |
| P31641    | P31641    | Sodium- and chloride-dependent taurine transp      | SLC6A6        | sp P31641 | 2  | 2 | 2 | 0 | 0 | 0  | 0  | 2 | 0 | 0 | 0 | 2 | 0 | 0 | 2      | 2.9      | 69.829   | 0        | 4.6485   | 21759000 | 0        | 0        | 0        | 0        | 0        | 0       | 0        | 0       | 894840  | 0 |        |   |
| A6NIH7    | A6NIH7    | Protein unc-119 homolog B                          | UNC119B       | sp A6NIH7 | 2  | 2 | 2 | 0 | 2 | 0  | 0  | 2 | 0 | 0 | 2 | 0 | 1 | 0 | 2      | 10.8     | 28.136   | 0.000716 | 3.2641   | 21685000 | 0        | 2897900  | 0        | 18787000 | 0        | 0       | 0        | 0       | 772630  | 0 |        |   |
| Q9NZJ6    | Q9NZJ6    | Ubiquinone biosynthesis O-methyltransferase, mi    | COQ3          | sp Q9NZJ6 | 1  | 1 | 1 | 0 | 1 | 0  | 0  | 0 | 1 | 0 | 0 | 0 | 1 | 0 | 0      | 4.3      | 41.054   | 0        | 6.3399   | 21614000 | 0        | 0        | 0        | 21614000 | 0        | 0       | 0        | 0       | 1905200 | 0 |        |   |
| P52429    | P52429    | Diacylglycerol kinase epsilon                      | DKGE          | sp P52429 | 2  | 2 | 2 | 0 | 2 | 0  | 0  | 2 | 0 | 0 | 0 | 2 | 0 | 0 | 4.8    | 63.926   | 0        | 4.9941   | 21520000 | 0        | 0        | 0        | 21520000 | 0        | 0        | 0       | 0        | 1896900 | 0       |   |        |   |
| Q15120    | Q15120    | [Pyruvate dehydrogenase [acetyl-transferring]] ki  | PDK3          | sp Q15120 | 2  | 2 | 2 | 0 | 2 | 0  | 1  | 0 | 2 | 0 | 1 | 0 | 2 | 0 | 6.7    | 46.938   | 0.001168 | 2.9211   | 21518000 | 0        | 16099000 | 0        | 5418900  | 0        | 1079000  | 0       | 562970   | 0       | 0       |   |        |   |
| Q9UER7    | Q9UER7    | Death domain-associated protein 6                  | DAXX          | sp Q9UER7 | 3  | 3 | 3 | 0 | 3 | 2  | 0  | 0 | 3 | 2 | 0 | 0 | 3 | 2 | 0      | 8.2      | 81.372   | 0        | 4.1089   | 21456000 | 0        | 18172000 | 3284100  | 0        | 0        | 0       | 1328400  | 2480400 | 0       | 0 |        |   |
| Q9NVV4    | Q9NVV4    | Poly(A) RNA polymerase, mitochondrial              | MTPAP         | sp Q9NVV4 | 1  | 1 | 1 | 0 | 0 | 0  | 0  | 0 | 1 | 0 | 0 | 0 | 1 | 0 | 0      | 4.1      | 66.171   | 0        | 4.9849   | 21409000 | 0        | 21409000 | 0        | 0        | 0        | 0       | 1887100  | 0       | 0       | 0 | 0      |   |
| Q9HSJ0    | Q9HSJ0    | Zinc finger and BTB domain-containing protein 3    | ZBTB3         | sp Q9HSJ0 | 2  | 2 | 2 | 0 | 2 | 0  | 0  | 2 | 0 | 0 | 2 | 0 | 2 | 0 | 12.5   | 61.827   | 0.000249 | 3.7536   | 21359000 | 0        | 21359000 | 0        | 0        | 0        | 0        | 0       | 14535000 | 0       | 0       | 0 |        |   |
| Q8NSL8    | Q8NSL8    | Ribonuclease P protein subunit p25-like protein    | RPP25L        | sp Q8NSL8 | 1  | 1 | 1 | 0 | 1 | 1  | 0  | 1 | 1 | 0 | 1 | 1 | 1 | 1 | 5.5    | 17.631   | 0.006213 | 1.7474   | 21312000 | 0        | 10415000 | 1557400  | 9399400  | 0        | 918110   | 0       | 1046600  | 384090  | 0       | 0 |        |   |
| Q9UPW5    | Q9UPW5    | Cytosolic carboxypeptidase 1                       | AGTPBP1       | sp Q9UPW5 | 1  | 1 | 1 | 0 | 1 | 0  | 0  | 1 | 0 | 0 | 0 | 0 | 0 | 0 | 0.9    | 138.45   | 0.001171 | 2.9734   | 21235000 | 0        | 21235000 | 0        | 0        | 0        | 0        | 0       | 1871800  | 0       | 0       | 0 | 0      |   |
| O75688    | O75688    | Protein phosphatase 1B                             | PPM1B         | sp O75688 | 2  | 1 | 1 | 0 | 2 | 0  | 0  | 2 | 0 | 1 | 0 | 0 | 0 | 0 | 5.2    | 52.642   | 0.008446 | 1.5961   | 21222000 | 0        | 0        | 0        | 2573200  | 0        | 0        | 0       | 18647000 | 0       | 0       | 0 | 766880 | 0 |
| Q16773    | Q16773    | Kynurenine--oxoglutarate transaminase 1            | CBCL1         | sp Q16773 | 1  | 1 | 1 | 0 | 1 | 0  | 1  | 0 | 1 | 0 | 1 | 0 | 1 | 0 | 1      | 3.1      | 47.875   | 0        | 5.3214   | 21139000 | 0        | 7567400  | 0        | 13572000 | 0        | 0       | 0        | 0       | 558140  | 0 |        |   |
| Q9NUQ2    | Q9NUQ2    | 1-acyl-sn-glycerol-3-phosphate acyltransferase e   | AGPAT5        | sp Q9NUQ2 | 1  | 1 | 1 | 0 | 1 | 1  | 1  | 0 | 1 | 1 | 0 | 1 | 1 | 1 | 3.3    | 42.072   | 0.000487 | 3.4952   | 21099000 | 0        | 3456700  | 1598500  | 16044000 | 0        | 453460   | 0       | 851420   | 733840  | 0       | 0 |        |   |
| Q5T2N8    | Q5T2N8    | ATPase family AAA domain-containing protein 3C     | ATAD3C        | sp Q5T2N8 | 13 | 1 | 1 | 0 | 8 | 11 | 13 | 0 | 0 | 1 | 1 | 0 | 1 | 1 | 30.9   | 46.379   | 0.006009 | 1.6762   | 21083000 | 0        | 0        | 4301300  | 16782000 | 0        | 0        | 0       | 2890500  | 690150  | 0       | 0 | 0      |   |
| Q96HV5    | Q96HV5    | Transmembrane protein 41A                          | TMEM41A       | sp Q96HV5 | 1  | 1 | 1 | 0 | 1 | 0  | 1  | 0 | 1 | 0 | 1 | 0 | 1 | 0 | 1      | 4.5      | 29.665   | 0        | 15.775   | 21068000 | 0        | 21068000 | 0        | 0        | 0        | 0       | 1857100  | 0       | 0       | 0 | 0      |   |
| Q96JL7    | Q96JL7    | Dehydrogenase/reductase SDR family member 1        | DHR51         | sp Q96JL7 | 1  | 1 | 1 | 0 | 1 | 0  | 1  | 0 | 1 | 0 | 1 | 0 | 1 | 0 | 1      | 4.5      | 33.909   | 0        | 4.262    | 21030000 | 0        | 3298300  | 0        | 17732000 | 0        | 290750  | 0        | 729240  | 0       | 0 | 0      |   |
| Q92508    | Q92508    | Piezoe-type mechanosensitive ion channel compo     | PIEZO1        | sp Q92508 | 2  | 2 | 2 | 0 | 0 | 0  | 2  | 0 | 0 | 0 | 0 | 0 | 0 | 2 | 1.8    | 286.79   | 0.003293 | 2.0861   | 20938000 | 0        | 0        | 0        | 0        | 0        | 0        | 0       | 0        | 861100  | 0       | 0 | 0      | 0 |
| Q8NSC7    | Q8NSC7    | DTW domain-containing protein 1                    | DTWD1         | sp Q8NSC7 | 2  | 2 | 2 | 0 | 0 | 0  | 2  | 0 | 0 | 0 | 2 | 0 | 0 | 2 | 8.2    | 35.248   | 0.000247 | 3.6674   | 20897000 | 0        | 0        | 0        | 0        | 0        | 0        | 0       | 20897000 | 0       | 0       | 0 | 859410 | 0 |
| Q9NZQ3    | Q9NZQ3    | NCK-interacting protein with SH3 domain            | NCKIP5D       | sp Q9NZQ3 | 2  | 2 | 2 | 0 | 1 | 0  | 2  | 0 | 0 | 2 | 0 | 0 | 2 | 0 | 2      | 4.6      | 78.959   | 0.000247 | 3.6747   | 20872000 | 0        | 2428200  | 0        | 18444000 | 0        | 570300  | 0        | 402260  | 0       | 0 | 0      | 0 |
| P21953    | P21953    | 2-oxoisovalerate dehydrogenase subunit beta, mi    | BCKDHB        | sp P21953 | 2  | 2 | 2 | 0 | 2 | 0  | 0  | 2 | 0 | 0 | 2 | 0 | 0 | 2 | 8.9    | 43.122   | 0        | 9.2041   | 20868000 | 0        | 20868000 | 0        | 0        | 0        | 0        | 0       | 1839500  | 0       | 0       | 0 | 0      |   |
| Q14409;P3 | Q14409;P3 | Putative glycercyl kinase 3;glycercyl kinase       | GK3P;GK       | sp Q14409 | 2  | 2 | 2 | 1 | 2 | 0  | 1  | 2 | 0 | 2 | 0 | 2 | 0 | 2 | 3.6    | 60.597   | 0.008453 | 1.599    | 20838000 | 380370   | 12247000 | 0        | 8210500  | 0        | 1152400  | 0       | 264820   | 0       | 0       | 0 | 0      |   |
| P49454    | P49454    | Centromere protein F                               | CENPF         | sp P49454 | 3  | 3 | 3 | 0 | 0 | 0  | 3  | 0 | 0 | 0 | 0 | 0 | 3 | 0 | 1.2    | 35.752   | 0        | 5.4918   | 20836000 | 0        | 0        | 0        | 20836000 | 0        | 0        | 0       | 0        | 856900  | 0       | 0 | 0      | 0 |
| Q96C00    | Q96C00    | Zinc finger and BTB domain-containing protein 9    | ZBTB9         | sp Q96C00 | 5  | 5 | 5 | 1 | 0 | 5  | 0  | 1 | 0 | 5 | 0 | 1 | 0 | 5 | 16.7   | 50.602   | 0        | 10.95    | 20816000 | 1136800  | 0        | 19679000 | 0        | 0        | 0        | 0       | 13224000 | 0       | 0       | 0 | 0      |   |
| Q96IG6    | Q96IG6    | Coiled-coil domain-containing protein 132          | CDC132        | sp Q96IG6 | 1  | 1 | 1 | 0 | 1 | 0  | 1  | 0 | 1 | 0 | 1 | 0 | 1 | 1 | 1.2    | 111.117  | 0.001164 | 2.8749   | 20788000 | 0        | 3785700  | 0        | 17002000 | 0        | 333700   | 0       | 699230   | 0       | 0       | 0 | 0      |   |
| Q9NQ29    | Q9NQ29    | Putative RNA-binding protein Luc7-like 1           | LUC7L         | sp Q9NQ29 | 7  | 2 | 2 | 1 | 6 | 4  | 5  | 2 | 1 | 1 | 0 | 2 | 1 | 1 | 18.1   | 43.727   | 0.00072  | 3.3254   | 20704000 | 0        | 12308000 | 642360   | 7753800  | 0        | 977090   | 0       | 461620   | 396750  | 0       | 0 | 0      | 0 |
| Q96AJ9    | Q96AJ9    | Vesicle transport through interaction with t-SNAR  | VTIA1         | sp Q96AJ9 | 2  | 2 | 2 | 0 | 0 | 0  | 2  | 0 | 0 | 2 | 0 | 0 | 2 | 0 | 12     | 25.217   | 0.000717 | 3.2828   | 20696000 | 0        | 0        | 0        | 0        | 0        | 0        | 0       | 20696000 | 0       | 0       | 0 | 851150 | 0 |
| Q9H759;Q  | Q9H759;Q  | Zinc finger protein 703;Zinc finger protein 503    | ZNF703;ZNF503 | sp Q9H759 | 1  | 1 | 1 | 0 | 1 | 0  | 1  | 0 | 1 | 0 | 1 | 0 | 1 | 2 | 58.221 | 0.000717 | 3.2774   | 20520000 | 0        | 15562000 | 0        | 4958400  | 0        | 1371800  | 0        | 203920  | 0        | 0       | 0       | 0 | 0      |   |
| O94875    | O94875    | Sorbin and SH3 domain-containing protein 2         | SORBS2        | sp O94875 | 2  | 2 | 2 | 0 | 2 | 1  | 0  | 2 | 1 | 0 | 1 | 0 | 2 | 1 | 3.7    | 124.11   | 0        | 4.5614   | 20503000 | 0        | 0        | 12782000 | 7720500  | 0        | 0        | 8177000 | 730400   | 0       | 0       | 0 | 0      |   |
| Q9UPM8    | Q9UPM8    | AP-4 complex subunit epsilon-1                     | AP4E1         | sp Q9UPM8 | 2  | 2 | 2 | 0 | 0 | 0  | 2  | 0 | 0 | 0 | 2 | 0 | 0 | 2 | 2.2    | 127.29   | 0        | 12.928   | 20411000 | 0        | 0        | 0        | 0        | 0        | 0        | 0       | 20411000 | 0       | 0       | 0 | 839400 | 0 |
| Q6P4I2    | Q6P4I2    | WD repeat-containing protein 73                    | WDR73         | sp Q6P4I2 | 1  | 1 | 1 | 0 | 1 | 0  | 1  | 0 | 1 | 0 | 1 | 0 | 1 | 0 | 2.6    | 41.685   | 0.003914 | 1.9553   | 20405000 | 0        | 7939600  | 0        | 12465000 | 0        | 699860   | 0       | 512650   | 0       | 0       | 0 | 0      |   |
| O75143    | O75143    | Autophagy-related protein 13                       | ATG13         | sp O75143 | 2  | 2 | 2 | 0 | 1 | 0  | 1  | 0 | 2 | 0 | 1 | 0 | 2 | 0 | 6.2    | 56.571   | 0        | 3.8295   | 20393000 | 0        | 3695000  | 0        | 16698000 | 0        | 419520   | 0       | 592900   | 0       | 0       | 0 | 0      |   |
| O7L1V2    | O7L1V2    | Vacuolar fusion protein MORN1 homolog B            | MORN1B        | sp O7L1V2 | 1  | 1 | 1 | 0 | 1 | 0  | 1  | 0 | 1 | 0 | 1 | 0 | 1 | 0 | 5.5    | 59.767   | 0.001148 | 2.6447   | 20345000 | 0        | 4500400  | 0        | 15864000 | 0        | 396700   | 0       | 852420   | 0       |         |   |        |   |

|        |        |                                                        |          |           |   |   |   |   |   |   |   |   |   |   |   |   |   |   |   |        |        |          |          |           |          |          |         |          |         |           |         |         |         |        |
|--------|--------|--------------------------------------------------------|----------|-----------|---|---|---|---|---|---|---|---|---|---|---|---|---|---|---|--------|--------|----------|----------|-----------|----------|----------|---------|----------|---------|-----------|---------|---------|---------|--------|
| Q9UHR4 | Q9UHR4 | Brain-specific angiogenesis inhibitor 1-associated     | BAIAP2L1 | sp Q9UHR  | 3 | 3 | 3 | 0 | 3 | 0 | 0 | 0 | 3 | 0 | 0 | 0 | 3 | 0 | 0 | 8.8    | 56.882 | 0        | 5.0564   | 17973000  | 0        | 17973000 | 0       | 0        | 0       | 1584300   | 0       | 0       |         |        |
| P25490 | P25490 | Transcriptional repressor YY1                          | YY1      | sp P25490 | 2 | 2 | 2 | 0 | 2 | 1 | 1 | 0 | 2 | 1 | 1 | 0 | 2 | 1 | 1 | 6.8    | 44.712 | 0        | 6.3675   | 17954000  | 0        | 9724100  | 1147100 | 7082400  | 0       | 944820    | 603480  | 370960  |         |        |
| Q9BWD3 | Q9BWD3 | Protein FAM127B;Protein FAM127C                        | FAM127B; | sp Q9BWC  | 2 | 2 | 0 | 2 | 0 | 0 | 0 | 0 | 2 | 0 | 2 | 0 | 2 | 0 | 2 | 14.2   | 13.188 | 0.002869 | 2.1252   | 17924000  | 0        | 3663900  | 0       | 14260000 | 0       | 321630    | 0       | 587820  |         |        |
| P05067 | P05067 | Amyloid beta A4 protein;N-APP;Soluble APP-APP          | APP      | sp P05067 | 1 | 1 | 1 | 0 | 1 | 1 | 1 | 1 | 1 | 1 | 1 | 1 | 1 | 1 | 1 | 1.6    | 86.942 | 0        | 4.5207   | 17893000  | 0        | 2052200  | 601200  | 15240000 | 0       | 210550    | 314640  | 686470  |         |        |
| Q9H1Z4 | Q9H1Z4 | WD repeat-containing protein 13                        | WDR13    | sp Q9H1Z  | 2 | 2 | 0 | 1 | 1 | 0 | 1 | 0 | 1 | 1 | 1 | 0 | 1 | 1 | 1 | 6.6    | 53.695 | 0.001143 | 2.5953   | 17880000  | 0        | 6799300  | 1163800 | 9917100  | 0       | 599350    | 782060  | 0       |         |        |
| Q9UNH6 | Q9UNH6 | Sorting nexin-7                                        | SNX7     | sp Q9UNH  | 1 | 1 | 1 | 0 | 1 | 0 | 1 | 0 | 1 | 0 | 1 | 0 | 1 | 0 | 1 | 2.8    | 45.302 | 0.00114  | 2.5662   | 17874000  | 0        | 6167300  | 0       | 11707000 | 0       | 0         | 0       | 481440  |         |        |
| P55081 | P55081 | Microfibrillar-associated protein 1                    | MFAF1    | sp P55081 | 2 | 2 | 0 | 1 | 0 | 0 | 2 | 0 | 0 | 2 | 0 | 0 | 2 | 0 | 2 | 6.4    | 51.958 | 0.008437 | 1.5859   | 17872000  | 0        | 6072800  | 0       | 11799000 | 0       | 800610    | 0       | 219950  |         |        |
| P20248 | P20248 | Cyclin-A2                                              | CNCA2    | sp P20248 | 1 | 1 | 1 | 0 | 1 | 1 | 0 | 1 | 0 | 1 | 0 | 0 | 1 | 1 | 0 | 3.7    | 48.55  | 0        | 5.3335   | 17773000  | 0        | 15042000 | 2730500 | 0        | 0       | 0         | 1326000 | 1834900 | 0       |        |
| Q6UUV9 | Q6UUV9 | CREB-regulated transcription coactivator 1             | CRTC1    | sp Q6UUV  | 2 | 2 | 2 | 0 | 1 | 0 | 0 | 2 | 0 | 0 | 2 | 0 | 0 | 2 | 5 | 67.299 | 0      | 5.3637   | 17770000 | 0         | 12773000 | 0        | 4996700 | 0        | 1125900 | 0         | 205490  |         |         |        |
| Q96U17 | Q96U17 | C1GALT1-specific chaperone 1                           | C1GALT1C | sp Q96U1  | 1 | 1 | 1 | 0 | 0 | 0 | 0 | 0 | 1 | 0 | 0 | 0 | 1 | 0 | 0 | 6.6    | 36.382 | 0.001156 | 2.7587   | 17674000  | 0        | 0        | 0       | 0        | 0       | 1767400   | 0       | 726850  |         |        |
| Q8T8E7 | Q8T8E7 | Solute carrier family 35 member G2                     | SLC35G2  | sp Q8T8E  | 2 | 2 | 0 | 0 | 0 | 0 | 0 | 0 | 2 | 0 | 0 | 0 | 2 | 0 | 2 | 14.6   | 46.421 | 0        | 4.3599   | 17649000  | 0        | 0        | 0       | 0        | 0       | 1764900   | 0       | 725830  |         |        |
| Q9NZ63 | Q9NZ63 | Uncharacterized protein C9orf78                        | C9orf78  | sp Q9NZ6  | 1 | 1 | 1 | 0 | 1 | 0 | 0 | 1 | 0 | 1 | 0 | 1 | 0 | 1 | 0 | 3.1    | 33.688 | 0.002446 | 2.2191   | 17634000  | 0        | 8737800  | 0       | 8896000  | 0       | 770220    | 0       | 365850  |         |        |
| Q99081 | Q99081 | Transcription factor 12                                | TCF12    | sp Q9908  | 2 | 2 | 2 | 0 | 0 | 0 | 1 | 0 | 1 | 0 | 1 | 0 | 1 | 0 | 1 | 4      | 72.964 | 0        | 3.857    | 17625000  | 0        | 10907000 | 0       | 6717500  | 0       | 0         | 0       | 276260  |         |        |
| Q96GQ7 | Q96GQ7 | Probable ATP-dependent RNA helicase DDX27              | DDX27    | sp Q96GQ  | 1 | 1 | 0 | 0 | 1 | 1 | 0 | 0 | 0 | 1 | 1 | 0 | 0 | 1 | 1 | 1.8    | 89.834 | 0        | 4.286    | 17578000  | 0        | 0        | 2801700 | 14776000 | 0       | 0         | 1882700 | 607680  | 0       |        |
| Q9Y3B6 | Q9Y3B6 | ER membrane protein complex subunit 9                  | EMC9     | sp Q9Y3B  | 1 | 1 | 1 | 0 | 0 | 0 | 1 | 0 | 0 | 0 | 1 | 0 | 0 | 0 | 0 | 6.2    | 23.061 | 0        | 3.9491   | 17560000  | 0        | 0        | 0       | 0        | 0       | 1756000   | 0       | 722170  |         |        |
| Q5F1R6 | Q5F1R6 | Dnal homolog subfamily C member 21                     | DNAJC21  | sp Q5F1R  | 1 | 1 | 1 | 0 | 1 | 1 | 0 | 0 | 1 | 1 | 0 | 0 | 1 | 1 | 0 | 3      | 62.027 | 0        | 5.3319   | 17546000  | 0        | 12817000 | 4729300 | 0        | 0       | 1129800   | 3178000 | 0       |         |        |
| Q9BRG1 | Q9BRG1 | Vacuolar protein-sorting-associated protein 25         | VPS25    | sp Q9BRG  | 4 | 4 | 4 | 0 | 4 | 0 | 0 | 0 | 0 | 4 | 0 | 0 | 0 | 4 | 0 | 29.5   | 20.747 | 0        | 7.4267   | 17524000  | 0        | 17524000 | 0       | 0        | 0       | 1544700   | 0       | 0       |         |        |
| Q9UKV5 | Q9UKV5 | E3 ubiquitin-protein ligase AMFR                       | AMFR     | sp Q9UKV  | 1 | 1 | 1 | 0 | 0 | 0 | 0 | 1 | 0 | 0 | 0 | 0 | 1 | 0 | 0 | 4.7    | 72.995 | 0        | 14.881   | 17492000  | 0        | 0        | 0       | 0        | 0       | 17492000  | 0       | 719370  |         |        |
| P36021 | P36021 | Monocarboxylate transporter 8                          | SLC16A2  | sp P3602  | 2 | 2 | 2 | 0 | 0 | 1 | 2 | 0 | 0 | 1 | 2 | 0 | 0 | 1 | 2 | 4.5    | 59.511 | 0        | 4.4729   | 17454000  | 0        | 0        | 1017100 | 16437000 | 0       | 0         | 683510  | 675970  | 0       |        |
| Q99704 | Q99704 | Docking protein 1                                      | DKO1     | sp Q9970  | 1 | 1 | 1 | 0 | 0 | 0 | 0 | 1 | 0 | 0 | 0 | 0 | 1 | 0 | 0 | 5.6    | 52.391 | 0.00114  | 2.5621   | 17350000  | 0        | 0        | 0       | 0        | 0       | 17350000  | 0       | 0       | 1713510 | 0      |
| Q9HC36 | Q9HC36 | rRNA methyltransferase 3, mitochondrial                | RNMTL1   | sp Q9HC3  | 2 | 2 | 2 | 0 | 2 | 1 | 1 | 0 | 2 | 1 | 1 | 0 | 2 | 1 | 1 | 5.2    | 47.019 | 0.001134 | 2.4866   | 17349000  | 0        | 8957100  | 1803500 | 6588200  | 0       | 521420    | 1214000 | 537040  |         |        |
| Q8WVF1 | Q8WVF1 | Protein OSCP1                                          | OSCP1    | sp Q8WVF  | 1 | 1 | 1 | 0 | 1 | 0 | 1 | 0 | 1 | 0 | 1 | 0 | 1 | 0 | 1 | 4.4    | 44.586 | 0        | 3.8478   | 17224000  | 0        | 6708300  | 0       | 10516000 | 0       | 591330    | 0       | 432480  |         |        |
| Q9UHA3 | Q9UHA3 | Probable ribosome biogenesis protein RLP24             | RLS24D1  | sp Q9UHA  | 1 | 1 | 1 | 0 | 1 | 1 | 0 | 0 | 1 | 1 | 0 | 0 | 1 | 1 | 0 | 7.4    | 19.621 | 0.007041 | 1.7096   | 17219000  | 0        | 11137000 | 6081900 | 0        | 0       | 981710    | 4087000 | 0       |         |        |
| Q9Y3D0 | Q9Y3D0 | Mitotic spindle-associated MDMX complex subunit FAM968 | FAM968   | sp Q9Y3D  | 1 | 1 | 1 | 0 | 0 | 1 | 0 | 0 | 1 | 0 | 0 | 0 | 1 | 0 | 0 | 13.5   | 17.663 | 0.002874 | 2.1519   | 17157000  | 0        | 0        | 0       | 0        | 0       | 17157000  | 0       | 0       | 705880  |        |
| Q9UMZ2 | Q9UMZ2 | Synergistic gamma                                      | SYNRG    | sp Q9UMZ  | 2 | 2 | 2 | 0 | 0 | 0 | 2 | 0 | 0 | 2 | 0 | 0 | 2 | 0 | 0 | 3      | 140.65 | 0        | 14.39    | 17118000  | 0        | 0        | 0       | 0        | 0       | 17118000  | 0       | 0       | 704000  |        |
| Q12986 | Q12986 | Transcriptional repressor NF-X1                        | NFX1     | sp Q1298  | 2 | 2 | 2 | 0 | 2 | 1 | 2 | 0 | 2 | 1 | 2 | 0 | 2 | 1 | 2 | 2.9    | 124.39 | 0        | 5.8178   | 17109000  | 0        | 5246600  | 1527000 | 10335000 | 0       | 525820    | 1061300 | 326560  |         |        |
| Q9H4F1 | Q9H4F1 | Chromatin modification-related protein MEAF6           | MEAF6    | sp Q9H4F  | 1 | 1 | 1 | 0 | 1 | 0 | 0 | 0 | 1 | 0 | 0 | 0 | 1 | 0 | 0 | 7.9    | 21.635 | 0        | 5.5277   | 17106000  | 0        | 0        | 0       | 0        | 0       | 17106000  | 0       | 0       | 507900  |        |
| Q96K19 | Q96K19 | E3 ubiquitin-protein ligase RNFL70                     | RNF170   | sp Q96K1  | 1 | 1 | 1 | 0 | 1 | 0 | 1 | 0 | 1 | 0 | 1 | 0 | 1 | 0 | 1 | 5.4    | 29.814 | 0        | 4.995    | 17058000  | 0        | 0        | 0       | 0        | 0       | 17058000  | 0       | 0       | 415970  |        |
| Q9NVH6 | Q9NVH6 | Trimethyllysine dioxygenase, mitochondrial             | TMLHE    | sp Q9NVH  | 1 | 1 | 1 | 0 | 0 | 0 | 0 | 0 | 1 | 0 | 0 | 0 | 1 | 0 | 0 | 3.8    | 49.517 | 0.00025  | 3.8018   | 17037000  | 0        | 0        | 0       | 0        | 0       | 17037000  | 0       | 0       | 1501800 | 0      |
| Q13472 | Q13472 | DNA topoisomerase 3-alpha                              | TOP3A    | sp Q1347  | 2 | 1 | 1 | 2 | 1 | 2 | 1 | 1 | 0 | 0 | 0 | 0 | 0 | 0 | 0 | 2.4    | 112.37 | 0.000951 | 3.1881   | 17032000  | 0        | 0        | 0       | 0        | 0       | 17032000  | 0       | 0       | 1501300 | 0      |
| Q13541 | Q13541 | Eukaryotic translation initiation factor 4E-binding    | EIF4EBP1 | sp Q1354  | 1 | 1 | 1 | 0 | 0 | 0 | 0 | 1 | 0 | 0 | 0 | 0 | 1 | 0 | 0 | 22     | 12.58  | 0.001173 | 3.0164   | 17003000  | 0        | 0        | 0       | 0        | 0       | 17003000  | 0       | 0       | 1498800 | 0      |
| P08123 | P08123 | Collagen alpha-2(I) chain                              | COL1A2   | sp P0812  | 1 | 1 | 0 | 0 | 1 | 1 | 1 | 1 | 1 | 1 | 1 | 1 | 1 | 1 | 1 | 1.3    | 129.31 | 0.00157  | 2.3482   | 16980000  | 0        | 2177700  | 883620  | 13919000 | 0       | 260480    | 458120  | 639570  | 0       |        |
| Q9UHL4 | Q9UHL4 | Dipeptidyl peptidase 2                                 | PPP7     | sp Q9UHL  | 2 | 2 | 2 | 0 | 0 | 0 | 0 | 0 | 2 | 4 | 3 | 4 | 3 | 4 | 3 | 4.3    | 54.341 | 0.001148 | 2.6456   | 16961000  | 0        | 0        | 0       | 0        | 0       | 16961000  | 0       | 0       | 697550  | 0      |
| Q9NRW1 | Q9NRW1 | Ras-related protein Rab-6B                             | RAB6B    | sp Q9NRW  | 5 | 2 | 2 | 1 | 5 | 1 | 2 | 0 | 0 | 0 | 0 | 0 | 0 | 0 | 0 | 33.7   | 23.461 | 0        | 6.7358   | 16946000  | 0        | 0        | 0       | 0        | 0       | 16946000  | 0       | 0       | 1493700 | 0      |
| P82921 | P82921 | 28S ribosomal protein S21, mitochondrial               | MRPS21   | sp P8292  | 1 | 1 | 1 | 0 | 1 | 0 | 1 | 0 | 1 | 0 | 1 | 0 | 1 | 0 | 1 | 16.1   | 10.688 | 0        | 6.7399   | 16928000  | 0        | 0        | 0       | 0        | 0       | 16928000  | 0       | 0       | 1492200 | 0      |
| Q8IW35 | Q8IW35 | Centrosomal protein of 97 kDa                          | CEP97    | sp Q8IW3  | 2 | 2 | 2 | 0 | 2 | 0 | 0 | 0 | 0 | 0 | 0 | 0 | 0 | 0 | 0 | 4.5    | 96.98  | 0.001567 | 2.3096   | 16913000  | 0        | 0        | 0       | 0        | 0       | 16913000  | 0       | 0       | 1490800 | 0      |
| P09493 | P09493 | Tropomyosin alpha-1 chain                              | TPM1     | sp P0949  | 8 | 1 | 1 | 1 | 1 | 7 | 5 | 7 | 0 | 0 | 0 | 0 | 0 | 0 | 0 | 18.7   | 32.708 | 0.001158 | 2.7811   | 16888000  | 0        | 0        | 0       | 0        | 0       | 16888000  | 0       | 0       | 1488600 | 0      |
| Q7Z7N9 | Q7Z7N9 | Transmembrane protein 179B                             | TMEM179  | sp Q7Z7N  | 1 | 1 | 1 | 0 | 1 | 0 | 1 | 0 | 1 | 0 | 1 | 0 | 1 | 0 | 1 | 7.3    | 23.55  | 0.003913 | 1.9538   | 16886000  | 0        | 5807400  | 0       | 0        | 0       | 11056000  | 0       | 511920  | 0       | 454670 |
| Q60238 | Q60238 | BCL2/adenovirus E18 19 kDa protein-interacting         | BNIP3L   | sp Q6023  | 1 | 1 | 1 | 0 | 0 | 0 | 0 | 1 | 0 | 0 | 0 | 1 | 0 | 0 | 1 | 10     | 23.93  | 0.007437 | 1.6686   | 16756000  | 0        | 0        | 0       | 0        | 0       | 16756000  | 0       | 0       | 689100  | 0      |
| P49427 | P49427 | Ubiquitin-conjugating enzyme E2 R1                     | CDC34    | sp P4942  | 2 | 2 | 2 | 0 | 1 | 0 | 2 | 0 | 0 | 2 | 0 | 0 | 2 | 0 | 2 | 7.2    | 26.736 | 0.00308  | 2.098    | 16744000  | 0        | 2858400  | 0       | 0        | 0       | 13885000  | 0       | 0       | 571040  | 0      |
| Q9H3Q1 | Q9H3Q1 | Cdc42 effector protein 4                               | CDC42EP4 | sp Q9H3Q  | 1 | 1 | 1 | 0 | 0 | 0 | 1 | 0 | 0 | 0 | 0 | 0 | 1 | 0 | 0 | 1.5    | 37.979 | 0.004542 | 1.8751   | 16661000  | 0        | 0        | 0       | 0        | 0       | 16661000  | 0       | 0       | 685200  | 0      |
| Q9BZQ6 | Q9BZQ6 | ER degradation-enhancing alpha-mannosidase-like        | EDEM3    | sp Q9BZQ  | 1 | 1 | 1 | 0 | 0 | 0 | 1 | 0 | 0 | 0 | 0 | 0 | 1 | 0 | 0 | 2.3    | 104.66 | 0.006421 | 1.7362   | 16662000  | 0        | 0        | 0       | 0        | 0       | 16662000  | 0       | 0       | 684810  | 0      |
| Q9NWW5 | Q9NWW5 | Ceroid-lipofuscinosis neuronal protein CLING           | CLING    | sp Q9NWW  | 1 | 1 | 1 | 0 | 1 | 0 | 1 | 0 | 1 | 0 | 1 | 0 | 1 | 0 | 0 | 3.5    | 35.919 | 0        | 3.8355   | 16660000  | 0        | 6945000  | 0       | 0        | 0       | 16660000  | 0       | 612200  | 0       | 398730 |
| Q9N9B9 | Q9N9B9 | Protein C12orf4                                        | C12orf4  | sp Q9N9B  | 1 | 1 | 1 | 0 | 0 | 0 | 0 | 0 | 1 | 0 | 0 | 0 | 1 | 0 | 0 | 4.3    | 63.18  | 0.000715 | 2.3322   | 166605000 | 0        | 0        | 0       | 0        | 0       | 166605000 | 0       | 0       | 682890  | 0      |
| Q9BVC5 | Q9BVC5 | Ashtwin                                                | C2orf49  | sp Q9BVC  | 1 | 1 | 1 | 0 | 1 | 0 | 1 | 0 | 1 | 0 | 1 | 0 | 1 | 0 | 1 | 5.6    | 25.858 | 0.004538 | 1.8585   | 16557000  | 0        | 6767000  | 0       | 9828900  | 0       | 596500    | 0       | 404260  | 0       |        |

|                          |                          |                                                            |           |           |   |   |   |   |   |   |   |   |   |   |   |   |      |        |          |          |          |          |          |          |          |          |         |         |         |        |
|--------------------------|--------------------------|------------------------------------------------------------|-----------|-----------|---|---|---|---|---|---|---|---|---|---|---|---|------|--------|----------|----------|----------|----------|----------|----------|----------|----------|---------|---------|---------|--------|
| Q12884                   | Q12884                   | Prolyl endopeptidase FAP;Antiplasmin-cleaving er FAP       | sp Q12884 | 1         | 1 | 1 | 0 | 0 | 0 | 1 | 0 | 0 | 0 | 1 | 0 | 0 | 1    | 2.5    | 87.711   | 0        | 8.9072   | 14862000 | 0        | 0        | 0        | 14862000 | 0       | 0       | 0       | 611190 |
| Q6VN20                   | Q6VN20                   | Ran-binding protein 10                                     | RANBP10   | sp Q6VN20 | 1 | 1 | 1 | 0 | 1 | 0 | 1 | 0 | 1 | 0 | 1 | 0 | 1    | 2.3    | 67.256   | 0        | 4.7606   | 14792000 | 0        | 4001300  | 0        | 10791000 | 0       | 352710  | 0       | 443790 |
| Q95210                   | Q95210                   | Starch-binding domain-containing protein 1                 | STBD1     | sp Q95210 | 1 | 1 | 1 | 0 | 0 | 0 | 0 | 0 | 0 | 1 | 0 | 0 | 4.2  | 39.007 | 0.000246 | 3.6332   | 14779000 | 0        | 0        | 0        | 14779000 | 0        | 0       | 0       | 607810  |        |
| Q96Q45                   | Q96Q45                   | Transmembrane protein 237                                  | TMEM237   | sp Q96Q45 | 1 | 1 | 1 | 0 | 0 | 0 | 1 | 0 | 0 | 1 | 0 | 0 | 1    | 4.2    | 45.252   | 0        | 4.7736   | 14762000 | 0        | 0        | 0        | 14762000 | 0       | 0       | 0       | 607900 |
| Q9H6U8                   | Q9H6U8                   | Alpha-1,2-mannosyltransferase ALG9                         | ALG9      | sp Q9H6U8 | 2 | 2 | 2 | 0 | 1 | 0 | 0 | 1 | 0 | 1 | 0 | 1 | 6.1  | 69.863 | 0.001133 | 2.4788   | 14719000 | 0        | 4707900  | 0        | 10011000 | 0        | 414990  | 0       | 0       |        |
| P32780                   | P32780                   | General transcription factor IIH subunit 1                 | GTF2H1    | sp P32780 | 1 | 1 | 1 | 0 | 0 | 0 | 0 | 1 | 0 | 0 | 1 | 0 | 1.6  | 62.031 | 0.001563 | 2.275    | 14640000 | 0        | 0        | 0        | 14640000 | 0        | 0       | 0       | 602100  |        |
| P50336                   | P50336                   | Protoporphyrin oxidase                                     | PROX      | sp P50336 | 1 | 1 | 1 | 0 | 0 | 0 | 0 | 1 | 0 | 0 | 1 | 0 | 3.6  | 50.765 | 0        | 5.0627   | 14608000 | 0        | 0        | 0        | 14608000 | 0        | 0       | 0       | 600770  |        |
| Q9Y653                   | Q9Y653                   | G-protein coupled receptor 56;GPR56 N-terminal             | GPR56     | sp Q9Y653 | 1 | 1 | 1 | 0 | 0 | 0 | 0 | 1 | 0 | 0 | 1 | 0 | 1.7  | 77.737 | 0.001155 | 2.7441   | 14547000 | 0        | 0        | 0        | 14547000 | 0        | 0       | 0       | 598260  |        |
| Q53533                   | Q53533                   | Bola-like protein 3                                        | BOLA3     | sp Q53533 | 1 | 1 | 1 | 0 | 1 | 0 | 0 | 1 | 0 | 1 | 0 | 1 | 15.9 | 12.114 | 0.001153 | 2.7107   | 14523000 | 0        | 5685200  | 0        | 8883200  | 0        | 501140  | 0       | 363480  |        |
| Q14545                   | Q14545                   | TRAF-type zinc finger domain-containing protein 1          | TRAF1     | sp Q14545 | 2 | 2 | 2 | 0 | 2 | 1 | 2 | 0 | 2 | 1 | 2 | 2 | 3.8  | 64.84  | 0        | 4.1329   | 14469000 | 0        | 7685500  | 298860   | 6485600  | 0        | 640760  | 283230  | 221010  |        |
| Q9P702                   | Q9P702                   | FERM domain-containing protein 4A                          | FERM4A    | sp Q9P702 | 1 | 1 | 1 | 0 | 0 | 1 | 0 | 1 | 0 | 1 | 0 | 1 | 1.3  | 115.46 | 0.00117  | 2.963    | 14463000 | 0        | 0        | 1931100  | 12531000 | 0        | 1297700 | 0       | 515360  |        |
| Q8NHV4                   | Q8NHV4                   | Protein NEDD1                                              | NEDD1     | sp Q8NHV4 | 1 | 1 | 1 | 0 | 1 | 0 | 1 | 0 | 1 | 0 | 1 | 0 | 2.7  | 71.965 | 0.001161 | 2.829    | 14459000 | 0        | 4975100  | 0        | 9484200  | 0        | 438550  | 0       | 390040  |        |
| Q9Y3Q3                   | Q9Y3Q3                   | Transmembrane emp24 domain-containing prote                | TME2D3    | sp Q9Y3Q3 | 1 | 1 | 1 | 0 | 1 | 0 | 1 | 0 | 1 | 0 | 1 | 0 | 4.6  | 24.777 | 0.007141 | 1.6754   | 14446000 | 0        | 4421100  | 0        | 10025200 | 0        | 0       | 0       | 412280  |        |
| Q6Z5I8                   | Q6Z5I8                   | Uncharacterized protein C1orf122                           | C1orf122  | sp Q6Z5I8 | 1 | 1 | 1 | 0 | 0 | 0 | 1 | 0 | 0 | 1 | 0 | 0 | 10   | 11.471 | 0.001044 | 2.8599   | 14444000 | 0        | 14444000 | 0        | 0        | 0        | 1273300 | 0       | 0       |        |
| B3EWF7                   | B3EWF7                   | Laforin, isoform 9                                         | EPM2A     | sp B3EWF7 | 1 | 1 | 1 | 1 | 1 | 1 | 1 | 1 | 1 | 1 | 1 | 1 | 3.5  | 35.169 | 0.000487 | 3.4998   | 14314000 | 0        | 9628700  | 482970   | 4202100  | 0        | 924080  | 244000  | 178050  |        |
| Q99735                   | Q99735                   | Microsomal glutathione S-transferase 2                     | MGST2     | sp Q99735 | 1 | 1 | 1 | 0 | 0 | 0 | 0 | 1 | 0 | 0 | 1 | 0 | 9.5  | 16.62  | 0.00328  | 2.0432   | 14311000 | 0        | 14311000 | 0        | 0        | 0        | 1261500 | 0       | 0       |        |
| Q1ED39                   | Q1ED39                   | Lysine-rich nucleolar protein 1                            | KNOP1     | sp Q1ED39 | 2 | 2 | 2 | 0 | 2 | 2 | 2 | 2 | 2 | 2 | 2 | 2 | 5.5  | 51.588 | 0.000157 | 2.7728   | 14152000 | 0        | 7989200  | 2511500  | 3659900  | 0        | 809590  | 1442900 | 286560  |        |
| Q8IW45                   | Q8IW45                   | ATP-dependent (S)-NAD(P)H-hydrate dehydratas               | CARD      | sp Q8IW45 | 1 | 1 | 1 | 0 | 1 | 0 | 1 | 0 | 1 | 0 | 1 | 0 | 3.7  | 36.576 | 0.00095  | 3.168    | 14115000 | 0        | 4118600  | 0        | 9602900  | 0        | 363050  | 0       | 411100  |        |
| Q9UM13                   | Q9UM13                   | Anaphase-promoting complex subunit 10                      | ANAPC10   | sp Q9UM13 | 3 | 3 | 3 | 0 | 1 | 3 | 0 | 1 | 3 | 0 | 1 | 3 | 0    | 23.8   | 21.252   | 0.000487 | 3.485    | 14108000 | 0        | 2881000  | 11227000 | 0        | 505960  | 7292500 | 0       |        |
| O15541                   | O15541                   | RING finger protein 113A                                   | RNF113A   | sp O15541 | 1 | 1 | 1 | 0 | 1 | 0 | 1 | 0 | 1 | 0 | 1 | 0 | 3.8  | 38.787 | 0.001135 | 2.4889   | 14097000 | 0        | 8154200  | 0        | 5942700  | 0        | 718790  | 0       | 244400  |        |
| Q9Y448                   | Q9Y448                   | Small kinetochore-associated protein                       | KNSTRN    | sp Q9Y448 | 2 | 2 | 2 | 0 | 1 | 0 | 2 | 0 | 1 | 0 | 2 | 0 | 7    | 35.438 | 0        | 5.4828   | 14050000 | 0        | 1749900  | 0        | 12300000 | 0        | 0       | 0       | 505840  |        |
| Q8TEB9                   | Q8TEB9                   | Rhomboid-related protein 4                                 | RHBD1     | sp Q8TEB9 | 1 | 1 | 1 | 0 | 0 | 1 | 0 | 1 | 0 | 1 | 0 | 1 | 5.4  | 35.823 | 0        | 6.7581   | 14041000 | 0        | 0        | 0        | 14041000 | 0        | 0       | 0       | 577460  |        |
| Q96B8N                   | Q96B8N                   | Ubiquitin thioesterase otulin                              | OTULIN    | sp Q96B8N | 2 | 2 | 2 | 0 | 2 | 0 | 0 | 2 | 0 | 2 | 0 | 2 | 0    | 6      | 40.262   | 0        | 4.0024   | 14014000 | 0        | 14014000 | 0        | 0        | 0       | 1235300 | 0       | 0      |
| Q5T803                   | Q5T803                   | Acyl-CoA-binding domain-containing protein 5               | ACBD5     | sp Q5T803 | 1 | 1 | 1 | 0 | 0 | 1 | 0 | 0 | 1 | 0 | 0 | 1 | 1.9  | 60.091 | 0.001347 | 2.3712   | 14004000 | 0        | 0        | 0        | 14004000 | 0        | 0       | 0       | 575940  |        |
| O75530                   | O75530                   | Polycomb protein EED                                       | EED       | sp O75530 | 2 | 2 | 2 | 0 | 2 | 0 | 2 | 0 | 2 | 0 | 2 | 0 | 6.3  | 50.197 | 0.001789 | 2.2645   | 13964000 | 0        | 7651900  | 0        | 6312500  | 0        | 527530  | 0       | 406580  |        |
| Q96BW2                   | Q96BW2                   | Transcriptional adapter 1                                  | TADA1     | sp Q96BW2 | 2 | 2 | 2 | 0 | 2 | 0 | 0 | 2 | 0 | 0 | 2 | 0 | 6.3  | 37.381 | 0.001141 | 2.5752   | 13918000 | 0        | 13918000 | 0        | 0        | 0        | 1226800 | 0       | 0       |        |
| Q9NZ43                   | Q9NZ43                   | Vesicle transport protein USE1                             | USE1      | sp Q9NZ43 | 1 | 1 | 1 | 0 | 0 | 0 | 1 | 0 | 0 | 1 | 0 | 0 | 4.2  | 29.371 | 0.001133 | 2.4347   | 13899000 | 0        | 0        | 0        | 13899000 | 0        | 0       | 0       | 571180  |        |
| Q6Z705                   | Q6Z705                   | Protein MMS22-like                                         | MMS22L    | sp Q6Z705 | 1 | 1 | 1 | 0 | 1 | 0 | 1 | 0 | 1 | 0 | 1 | 0 | 0.9  | 142.32 | 0.001562 | 2.7202   | 13881000 | 0        | 4277400  | 0        | 9604100  | 0        | 0       | 0       | 394970  |        |
| Q8N138                   | Q8N138                   | ORM1-like protein 3                                        | ORMDL3    | sp Q8N138 | 2 | 2 | 2 | 0 | 2 | 0 | 1 | 0 | 1 | 0 | 1 | 0 | 1.7  | 17.494 | 0        | 4.0137   | 13821000 | 0        | 3281800  | 0        | 10539000 | 0        | 289290  | 0       | 434340  |        |
| Q96RF0                   | Q96RF0                   | Sorting nexin-18                                           | SNX18     | sp Q96RF0 | 2 | 2 | 2 | 0 | 0 | 0 | 2 | 0 | 0 | 2 | 0 | 2 | 4.6  | 68.894 | 0        | 4.0755   | 13796000 | 0        | 0        | 0        | 13796000 | 0        | 0       | 0       | 567390  |        |
| P13686                   | P13686                   | Tartrate-resistant acid phosphatase type 5                 | ACP5      | sp P13686 | 1 | 1 | 1 | 0 | 0 | 0 | 1 | 0 | 0 | 1 | 0 | 0 | 3.7  | 36.598 | 0.001157 | 2.777    | 13787000 | 0        | 0        | 0        | 13787000 | 0        | 0       | 0       | 566990  |        |
| Q9Y619                   | Q9Y619                   | Mitochondrial ornithine transporter 1                      | SLC25A15  | sp Q9Y619 | 1 | 1 | 1 | 0 | 1 | 0 | 1 | 0 | 1 | 0 | 1 | 0 | 4    | 32.736 | 0.008462 | 1.608    | 13768000 | 0        | 0        | 0        | 13768000 | 0        | 0       | 0       | 566210  |        |
| Q6A108                   | Q6A108                   | HEAT repeat-containing protein 6                           | HEATR6    | sp Q6A108 | 3 | 3 | 3 | 0 | 0 | 0 | 3 | 0 | 0 | 3 | 0 | 0 | 3.5  | 128.78 | 0        | 17.421   | 13728000 | 0        | 13728000 | 0        | 0        | 0        | 1210100 | 0       | 0       |        |
| Q7Z5H3                   | Q7Z5H3                   | Rho GTPase-activating protein 22                           | ARHGAP22  | sp Q7Z5H3 | 3 | 3 | 3 | 0 | 2 | 1 | 0 | 0 | 2 | 1 | 0 | 2 | 1    | 6.9    | 76.778   | 0.00025  | 3.7936   | 13726000 | 0        | 5057600  | 8668500  | 0        | 0       | 0       | 3398700 | 0      |
| P51606                   | P51606                   | N-acetylglucosamine 2-epimerase                            | RENBP     | sp P51606 | 1 | 1 | 1 | 0 | 0 | 1 | 0 | 0 | 1 | 0 | 0 | 1 | 3.3  | 48.83  | 0.000245 | 3.5953   | 13699000 | 0        | 0        | 0        | 13699000 | 0        | 0       | 0       | 563370  |        |
| P01594;P01594;P01594     | P01594;P01594;P01594     | Ig kappa chain V-l region AU;Ig kappa chain V-l region AG  | TRMT2A    | sp P01594 | 1 | 1 | 1 | 0 | 1 | 0 | 0 | 1 | 0 | 1 | 0 | 1 | 13.7 | 12.848 | 0.000723 | 3.3571   | 13699000 | 0        | 13699000 | 0        | 0        | 0        | 9205400 | 0       | 0       |        |
| Q8I269                   | Q8I269                   | IRNA (luciferase)-methyltransferase homolog A              | TRMT2B    | sp Q8I269 | 2 | 2 | 2 | 0 | 2 | 1 | 1 | 0 | 2 | 1 | 1 | 0 | 3.5  | 68.725 | 0.00516  | 1.7911   | 13692000 | 0        | 5375200  | 970950   | 7346000  | 0        | 409740  | 691470  | 327180  |        |
| Q9NY12                   | Q9NY12                   | H/ACA ribonucleoprotein complex subunit 1                  | GAR1      | sp Q9NY12 | 2 | 2 | 2 | 0 | 1 | 2 | 1 | 2 | 1 | 2 | 1 | 2 | 7.4  | 22.348 | 0.000246 | 3.6423   | 13671000 | 0        | 3804000  | 2867700  | 7723100  | 0        | 586690  | 1563000 | 366560  |        |
| Q9BR52                   | Q9BR52                   | Serine/threonine-protein kinase RIO1                       | RIOK1     | sp Q9BR52 | 2 | 2 | 2 | 0 | 2 | 0 | 0 | 2 | 0 | 2 | 0 | 2 | 3.9  | 65.582 | 0.001783 | 2.2517   | 13543000 | 0        | 13543000 | 0        | 0        | 0        | 1193800 | 0       | 0       |        |
| Q4VCS5;Q4VCS5;Q4VCS5     | Q4VCS5;Q4VCS5;Q4VCS5     | Angiotensin-Angiotensin-like protein 1                     | AMOT;AM   | sp Q4VCS5 | 2 | 2 | 2 | 0 | 2 | 0 | 2 | 0 | 2 | 0 | 2 | 0 | 1.7  | 118.08 | 0.003076 | 2.0926   | 13478000 | 0        | 13478000 | 0        | 0        | 0        | 1188100 | 0       | 0       |        |
| Q9UB58                   | Q9UB58                   | E3 ubiquitin-protein ligase RNF14                          | RNF14     | sp Q9UB58 | 2 | 2 | 2 | 0 | 1 | 0 | 1 | 0 | 1 | 0 | 1 | 0 | 8.6  | 53.837 | 0.001565 | 2.2993   | 13384000 | 0        | 8515000  | 0        | 4568900  | 0        | 488080  | 0       | 476850  |        |
| P54646                   | P54646                   | 5-AMP-activated protein kinase catalytic subunit; PKKA2    | PKCA2     | sp P54646 | 2 | 2 | 2 | 0 | 2 | 0 | 1 | 0 | 2 | 0 | 1 | 0 | 8.9  | 62.319 | 0.001145 | 2.6125   | 13348000 | 0        | 13348000 | 0        | 0        | 0        | 1176600 | 0       | 0       |        |
| Q96C11                   | Q96C11                   | FGG3 carboxyltransferase kinase domain-containing prc FGG3 | FGG3      | sp Q96C11 | 1 | 1 | 1 | 0 | 0 | 1 | 0 | 0 | 1 | 0 | 0 | 1 | 2.5  | 59.992 | 0.001137 | 2.518    | 13320000 | 0        | 0        | 0        | 13320000 | 0        | 0       | 0       | 547800  |        |
| Q2Z4F1                   | Q2Z4F1                   | Low-density lipoprotein receptor-related protein 1         | LRP1D     | sp Q2Z4F1 | 1 | 1 | 1 | 0 | 0 | 0 | 1 | 0 | 0 | 1 | 0 | 0 | 2.9  | 76.193 | 0        | 4.0868   | 13140000 | 0        | 0        | 0        | 13140000 | 0        | 0       | 0       | 540400  |        |
| Q2VP87                   | Q2VP87                   | AP-5 complex subunit beta-1                                | AP5B1     | sp Q2VP87 | 1 | 1 | 1 | 0 | 0 | 0 | 1 | 0 | 0 | 1 | 0 | 1 | 1.4  | 93.948 | 0.000143 | 2.5879   | 13038000 | 0        | 0        | 0        | 13038000 | 0        | 0       | 0       | 536200  |        |
| Q96GY0                   | Q96GY0                   | Zinc finger C2HC domain-containing protein 1A              | ZC2HC1A   | sp Q96GY0 | 2 | 2 | 2 | 0 | 1 | 2 | 2 | 0 | 1 | 2 | 2 | 0 | 7.1  | 35.092 | 0.001174 | 3.2308   | 13009000 | 0        | 1626300  | 1424900  | 9958100  | 0        | 341490  | 734730  | 434220  |        |
| POCG08;B1POCG08;B1POCG08 | POCG08;B1POCG08;B1POCG08 | Golgi pH regulator B;Golgi pH regulator A                  | GPR89B;G1 | sp POCG08 | 2 | 2 | 2 | 0 | 1 | 0 | 0 | 1 | 0 | 1 | 0 | 0 | 5.9  | 52.916 | 0.000439 | 1.5905   | 12987000 | 0        | 12987000 | 0        | 0        | 0        | 1144800 | 0       | 0       |        |
| Q9UIK0                   | Q9UIK0                   | Ribosome biogenesis protein TRS3 homolog                   | TRS3      | sp Q9UIK0 | 2 | 2 | 2 | 0 | 0 | 2 | 0 | 0 | 2 | 0 | 0 | 2 | 9    | 33.596 | 0.002425 | 3.5665   | 12982000 | 0        | 0        | 0        | 12982000 | 0        | 0       | 0       | 533890  |        |
| Q9H6Y2                   | Q9H6Y2                   | WD repeat-containing protein 55                            | WDR       |           |   |   |   |   |   |   |   |   |   |   |   |   |      |        |          |          |          |          |          |          |          |          |         |         |         |        |







| Majority protein IDs | Protein names                                       | Gene names       | Intensity | log(2)-fold change U87_ADCY8-IP/U87 lysate |
|----------------------|-----------------------------------------------------|------------------|-----------|--------------------------------------------|
| Q9Y4L1               | Hypoxia up-regulated protein 1                      | HYOU1            | 7.467E+09 | -8.87881                                   |
| P49588               | Alanine--tRNA ligase, cytoplasmic                   | AARS             | 8.462E+09 | -8.36187                                   |
| O43747               | AP-1 complex subunit gamma-1                        | AP1G1            | 1.28E+09  | -8.3128                                    |
| P53992               | Protein transport protein Sec24C                    | SEC24C           | 1.932E+09 | -8.21981                                   |
| P13804               | Electron transfer flavoprotein subunit alpha, mitoc | ETFA             | 4.986E+09 | -8.06995                                   |
| Q05193               | Dynamin-1                                           | DNM1             | 1.824E+09 | -8.02666                                   |
| P40121               | Macrophage-capping protein                          | CAPG             | 3.009E+09 | -7.66806                                   |
| P68036               | Ubiquitin-conjugating enzyme E2 L3                  | UBE2L3           | 7.738E+09 | -7.66321                                   |
| Q99798               | Aconitate hydratase, mitochondrial                  | ACO2             | 6.428E+09 | -7.611                                     |
| P04181               | Ornithine aminotransferase, mitochondrial;Ornithi   | OAT              | 6.178E+09 | -7.56763                                   |
| P10620               | Microsomal glutathione S-transferase 1              | MGST1            | 982570000 | -7.50635                                   |
| P06132               | Uroporphyrinogen decarboxylase                      | UROD             | 2.109E+09 | -7.3472                                    |
| P30566               | Adenylosuccinate lyase                              | ADSL             | 3.312E+09 | -7.30375                                   |
| P00374               | Dihydrofolate reductase                             | DHFR             | 1.187E+09 | -7.26164                                   |
| Q5GLZ8               | Probable E3 ubiquitin-protein ligase HERC4          | HERC4            | 975740000 | -7.19624                                   |
| P30043               | Flavin reductase (NADPH)                            | BLVRB            | 2.424E+09 | -7.10379                                   |
| P52788               | Spermine synthase                                   | SMS              | 4.883E+09 | -7.08105                                   |
| P31939               | Bifunctional purine biosynthesis protein PURH;Pho   | ATIC             | 1.541E+10 | -7.08031                                   |
| P60983               | Glia maturation factor beta                         | GMFB             | 1.394E+09 | -7.03485                                   |
| Q16401               | 26S proteasome non-ATPase regulatory subunit 5      | PSMD5            | 1.463E+09 | -7.0334                                    |
| Q15836               | Vesicle-associated membrane protein 3               | VAMP3            | 673180000 | -7.02115                                   |
| P30520               | Adenylosuccinate synthetase isozyme 2               | ADSS             | 1.655E+09 | -6.95994                                   |
| P00966               | Argininosuccinate synthase                          | ASS1             | 1.803E+09 | -6.94823                                   |
| P15559               | NAD(P)H dehydrogenase [quinone] 1                   | NQO1             | 1.539E+09 | -6.92101                                   |
| Q9H2G2               | STE20-like serine/threonine-protein kinase          | SLK              | 1.897E+09 | -6.90117                                   |
| P49915               | GMP synthase [glutamine-hydrolyzing]                | GMPS             | 5.426E+09 | -6.86586                                   |
| Q9UJU6               | Drebrin-like protein                                | DBNL             | 1.136E+09 | -6.81375                                   |
| A0AVT1               | Ubiquitin-like modifier-activating enzyme 6         | UBA6             | 2.688E+09 | -6.81198                                   |
| P28838               | Cytosol aminopeptidase                              | LAP3             | 3.612E+09 | -6.72426                                   |
| Q15785               | Mitochondrial import receptor subunit TOM34         | TOMM34           | 1.807E+09 | -6.71404                                   |
| P11413               | Glucose-6-phosphate 1-dehydrogenase                 | G6PD             | 5.248E+09 | -6.6959                                    |
| P43487               | Ran-specific GTPase-activating protein              | RANBP1           | 6.556E+09 | -6.53688                                   |
| P50502;Q8            | Hsc70-interacting protein;Putative protein FAM10    | ST13;ST13P5;ST13 | 5.354E+09 | -6.52716                                   |
| P07741               | Adenine phosphoribosyltransferase                   | APRT             | 2.333E+09 | -6.51584                                   |
| P17174               | Aspartate aminotransferase, cytoplasmic             | GOT1             | 5.906E+09 | -6.50304                                   |
| Q16881               | Thioredoxin reductase 1, cytoplasmic                | TXNRD1           | 4.306E+09 | -6.48057                                   |

|           |                                                             |          |                  |          |
|-----------|-------------------------------------------------------------|----------|------------------|----------|
| Q9Y6B6    | GTP-binding protein SAR1b                                   | SAR1B    | 699040000        | -6.43399 |
| P42765    | 3-ketoacyl-CoA thiolase, mitochondrial                      | ACAA2    | 1.365E+09        | -6.37695 |
| Q8IWE2    | Protein NOXP20                                              | FAM114A1 | 930990000        | -6.32318 |
| Q96BY6    | Dedicator of cytokinesis protein 10                         | DOCK10   | 417390000        | -6.3088  |
| P06744    | Glucose-6-phosphate isomerase                               | GPI      | 1.993E+10        | -6.30266 |
| Q12907    | Vesicular integral-membrane protein VIP36                   | LMAN2    | 2.058E+09        | -6.21797 |
| P11766    | Alcohol dehydrogenase class-3                               | ADH5     | 2.522E+09        | -6.20967 |
| Q15155    | Nodal modulator 1                                           | NOMO1    | 1.235E+09        | -6.20602 |
| P14314    | Glucosidase 2 subunit beta                                  | PRKCSH   | 5.008E+09        | -6.17097 |
| Q9ULC4;A0 | Malignant T-cell-amplified sequence 1                       | MCTS1    | 1.775E+09        | -6.13116 |
| Q99536    | Synaptic vesicle membrane protein VAT-1 homolog             | VAT1     | 3.276E+09        | -6.12824 |
| Q12965    | Unconventional myosin-1e                                    | MYO1E    | 1.146E+09        | -6.10634 |
| Q13617    | Cullin-2                                                    | CUL2     | 1.243E+09        | -6.08137 |
| P31930    | Cytochrome b-c1 complex subunit 1, mitochondria             | UQCRC1   | 4.279E+09        | -6.0769  |
| O60493    | Sorting nexin-3                                             | SNX3     | 1.203E+09        | -6.06579 |
| Q96AE4    | Far upstream element-binding protein 1                      | FUBP1    | 5.44E+09         | -6.05275 |
| Q7L576    | Cytoplasmic FMR1-interacting protein 1                      | CYFIP1   | 2.39E+09         | -6.05164 |
| O60443    | Non-syndromic hearing impairment protein 5                  | DFNA5    | 776300000        | -5.99801 |
| Q93045    | Stathmin-2                                                  | STMN2    | 554940000        | -5.97886 |
| P21912    | Succinate dehydrogenase [ubiquinone] iron-sulfur            | SDHB     | 897290000        | -5.97779 |
| P49591    | Serine--tRNA ligase, cytoplasmic                            | SARS     | 4.458E+09        | -5.96919 |
| Q9BS26    | Endoplasmic reticulum resident protein 44                   | ERP44    | 1.227E+09        | -5.96402 |
| O00764    | Pyridoxal kinase                                            | PDXK     | 2.674E+09        | -5.94925 |
| P04818    | Thymidylate synthase                                        | TYMS     | 1.338E+09        | -5.93748 |
| P50395    | Rab GDP dissociation inhibitor beta                         | GDI2     | 1.994E+10        | -5.93288 |
| P18669    | Phosphoglycerate mutase 1                                   | PGAM1    | 2.602E+10        | -5.92665 |
| Q16719    | Kynureninase                                                | KYNU     | 5.437E+09        | -5.91348 |
| Q92783    | Signal transducing adapter molecule 1                       | STAM     | 826190000        | -5.90976 |
| P37802    | Transgelin-2                                                | TAGLN2   | 1.087E+10        | -5.89213 |
| P04632    | Calpain small subunit 1                                     | CAPNS1   | 1.701E+09        | -5.88005 |
| Q92890    | Ubiquitin fusion degradation protein 1 homolog              | UFD1L    | 881570000        | -5.87193 |
| O94915    | Protein furry homolog-like                                  | FRYL     | 427850000        | -5.87187 |
| P30041    | Peroxiredoxin-6                                             | PRDX6    | 1.716E+10        | -5.8699  |
| P23381    | Tryptophan--tRNA ligase, cytoplasmic;T1-TrpRS;T2            | WARS     | 4.377E+09        | -5.80152 |
| P12111    | Collagen alpha-3(VI) chain                                  | COL6A3   | 3.735E+09        | -5.78699 |
| P48637    | Glutathione synthetase                                      | GSS      | 2.745E+09        | -5.77231 |
| P41567    | Eukaryotic translation initiation factor 1                  | EIF1     | 5.709E+09        | -5.74382 |
| Q15631    | Translin                                                    | TSN      | 3.06E+09         | -5.72499 |
| P37268    | Squalene synthase                                           | FDFT1    | 211630000        | -5.69598 |
| P47895    | Aldehyde dehydrogenase family 1 member A3                   | ALDH1A3  | 3.767E+09        | -5.69082 |
| Q13217    | DnaJ homolog subfamily C member 3                           | DNAJC3   | 811060000        | -5.66959 |
| O14786    | Neuropilin-1                                                | NRP1     | 1.045E+09        | -5.66309 |
| O95747    | Serine/threonine-protein kinase OSR1                        | OXSR1    | 1.413E+09        | -5.66303 |
| Q9HCJ6    | Synaptic vesicle membrane protein VAT-1 homolog             | VAT1L    | 1.053E+09        | -5.61033 |
| O15144    | Actin-related protein 2/3 complex subunit 2                 | ARPC2    | 4.326E+09        | -5.56927 |
| P06737    | Glycogen phosphorylase, liver form                          | PYGL     | 2.834E+09        | -5.56067 |
| Q9H299    | SH3 domain-binding glutamic acid-rich-like protein SH3BGRL3 |          | 2.792E+09        | -5.54732 |
| Q12765    | Secernin-1                                                  | SCRN1    | 822210000        | -5.5381  |
| Q9POV9    | Septin-10                                                   |          | Sep-10 275630000 | -5.5188  |
| Q15181    | Inorganic pyrophosphatase                                   | PPA1     | 1.062E+10        | -5.51229 |



|            |                                                    |               |           |          |
|------------|----------------------------------------------------|---------------|-----------|----------|
| P50552     | Vasodilator-stimulated phosphoprotein              | VASP          | 852320000 | -5.48646 |
| Q96G03     | Phosphoglucomutase-2                               | PGM2          | 852710000 | -5.48498 |
| P29401     | Transketolase                                      | TKT           | 1.925E+10 | -5.43525 |
| P23526     | Adenosylhomocysteinase                             | AHCY          | 1.277E+10 | -5.43371 |
| O00186     | Syntaxin-binding protein 3                         | STXBP3        | 431360000 | -5.42454 |
| Q6IN85     | Serine/threonine-protein phosphatase 4 regulator   | SMEK1         | 567910000 | -5.41697 |
| Q04828     | Aldo-keto reductase family 1 member C1             | AKR1C1        | 6.001E+09 | -5.4083  |
| P09601     | Heme oxygenase 1                                   | HMOX1         | 1.131E+09 | -5.40791 |
| P11216     | Glycogen phosphorylase, brain form                 | PYGB          | 2.41E+09  | -5.39404 |
| Q9NTX5     | Ethylmalonyl-CoA decarboxylase                     | ECHDC1        | 1.383E+09 | -5.38822 |
| P53396     | ATP-citrate synthase                               | ACLY          | 3.427E+10 | -5.38082 |
| O00193     | Small acidic protein                               | SMAP          | 629130000 | -5.37521 |
| O75937     | DnaJ homolog subfamily C member 8                  | DNAJC8        | 2.324E+09 | -5.34409 |
| P30085     | UMP-CMP kinase                                     | CMPK1         | 2.244E+09 | -5.34119 |
| Q14320     | Protein FAM50A                                     | FAM50A        | 836330000 | -5.3406  |
| P08133     | Annexin A6                                         | ANXA6         | 6.974E+09 | -5.33632 |
| Q92945     | Far upstream element-binding protein 2             | KHSRP         | 4.442E+09 | -5.33605 |
| P15531     | Nucleoside diphosphate kinase A                    | NME1          | 8.223E+09 | -5.33167 |
| P61011     | Signal recognition particle 54 kDa protein         | SRP54         | 2.449E+09 | -5.32282 |
| P41250     | Glycine--tRNA ligase                               | GARS          | 7.214E+09 | -5.322   |
| O75131     | Copine-3                                           | CPNE3         | 1.285E+09 | -5.3164  |
| P61081     | NEDD8-conjugating enzyme Ubc12                     | UBE2M         | 1.016E+09 | -5.30307 |
| P52209     | 6-phosphogluconate dehydrogenase, decarboxylat     | PGD           | 9.187E+09 | -5.30284 |
| P48739     | Phosphatidylinositol transfer protein beta isoform | PITPNB        | 1.217E+09 | -5.30061 |
| Q15382     | GTP-binding protein Rheb                           | RHEB          | 597380000 | -5.29531 |
| Q9H3N1     | Thioredoxin-related transmembrane protein 1        | TMX1          | 853690000 | -5.293   |
| P30044     | Peroxiredoxin-5, mitochondrial                     | PRDX5         | 3.426E+09 | -5.2765  |
| Q9NT62     | Ubiquitin-like-conjugating enzyme ATG3             | ATG3          | 1.185E+09 | -5.25295 |
| P22314     | Ubiquitin-like modifier-activating enzyme 1        | UBA1          | 2.496E+10 | -5.2476  |
| O00194     | Ras-related protein Rab-27B                        | RAB27B        | 828430000 | -5.23619 |
| P62820     | Ras-related protein Rab-1A                         | RAB1A         | 1.047E+10 | -5.2212  |
| P11310     | Medium-chain specific acyl-CoA dehydrogenase, m    | ACADM         | 2.09E+09  | -5.21114 |
| P46926     | Glucosamine-6-phosphate isomerase 1                | GNPDA1        | 1.481E+09 | -5.20604 |
| P11177     | Pyruvate dehydrogenase E1 component subunit b      | PDHB          | 4.025E+09 | -5.20138 |
| Q8N3F8     | MICAL-like protein 1                               | MICALL1       | 532840000 | -5.19236 |
| P19174     | 1-phosphatidylinositol 4,5-bisphosphate phospho    | PLCG1         | 397030000 | -5.17757 |
| P18206     | Vinculin                                           | VCL           | 1.316E+10 | -5.15376 |
| P09429;B2I | High mobility group protein B1;Putative high mobil | HMGB1;HMGB1P1 | 3.998E+09 | -5.11481 |
| P16949     | Stathmin                                           | STMN1         | 2.775E+09 | -5.11409 |
| Q92688     | Acidic leucine-rich nuclear phosphoprotein 32 fam  | ANP32B        | 2.191E+09 | -5.06884 |
| P00558     | Phosphoglycerate kinase 1                          | PGK1          | 4.354E+10 | -5.06519 |
| Q96AY3     | Peptidyl-prolyl cis-trans isomerase FKBP10         | FKBP10        | 641940000 | -5.05921 |
| Q14108     | Lysosome membrane protein 2                        | SCARB2        | 2.129E+09 | -5.05342 |
| P17301     | Integrin alpha-2                                   | ITGA2         | 730190000 | -5.05272 |
| O60610     | Protein diaphanous homolog 1                       | DIAPH1        | 1.262E+09 | -5.03886 |
| P07195     | L-lactate dehydrogenase B chain                    | LDHB          | 6.087E+10 | -5.02861 |
| P20810     | Calpastatin                                        | CAST          | 2.858E+09 | -5.0283  |
| P31948     | Stress-induced-phosphoprotein 1                    | STIP1         | 1.365E+10 | -5.0189  |
| Q00535     | Cyclin-dependent-like kinase 5                     | CDK5          | 904870000 | -4.9743  |
| P14550     | Alcohol dehydrogenase [NADP(+)]                    | AKR1A1        | 3.088E+09 | -4.96225 |

|        |                                                     |          |           |          |
|--------|-----------------------------------------------------|----------|-----------|----------|
| O00499 | Myc box-dependent-interacting protein 1             | BIN1     | 563560000 | -4.95715 |
| P36507 | Dual specificity mitogen-activated protein kinase k | MAP2K2   | 1.24E+09  | -4.92513 |
| O15118 | Niemann-Pick C1 protein                             | NPC1     | 1.545E+09 | -4.92369 |
| Q13439 | Golgin subfamily A member 4                         | GOLGA4   | 370350000 | -4.91854 |
| P48960 | CD97 antigen;CD97 antigen subunit alpha;CD97 an     | CD97     | 397850000 | -4.89356 |
| Q15185 | Prostaglandin E synthase 3                          | PTGES3   | 1.949E+09 | -4.8777  |
| Q8N766 | ER membrane protein complex subunit 1               | EMC1     | 1.478E+09 | -4.86999 |
| Q9NY33 | Dipeptidyl peptidase 3                              | DPP3     | 2.286E+09 | -4.83205 |
| Q16576 | Histone-binding protein RBBP7                       | RBBP7    | 1.535E+09 | -4.83044 |
| Q9NR31 | GTP-binding protein SAR1a                           | SAR1A    | 3.509E+09 | -4.82834 |
| Q15691 | Microtubule-associated protein RP/EB family mem     | MAPRE1   | 5.456E+09 | -4.82389 |
| P51148 | Ras-related protein Rab-5C                          | RAB5C    | 4.365E+09 | -4.8125  |
| Q9NRW7 | Vacuolar protein sorting-associated protein 45      | VPS45    | 982200000 | -4.81038 |
| P09972 | Fructose-bisphosphate aldolase C                    | ALDOC    | 6.455E+09 | -4.80305 |
| P20020 | Plasma membrane calcium-transporting ATPase 1       | ATP2B1   | 1.1E+09   | -4.78968 |
| Q8IWW6 | Rho GTPase-activating protein 12                    | ARHGAP12 | 114990000 | -4.77578 |
| P07737 | Profilin-1                                          | PFN1     | 3.953E+10 | -4.77432 |
| O60701 | UDP-glucose 6-dehydrogenase                         | UGDH     | 2.427E+09 | -4.77428 |
| Q9UBB4 | Ataxin-10                                           | ATXN10   | 946180000 | -4.74587 |
| P23919 | Thymidylate kinase                                  | DTYMK    | 1.358E+09 | -4.73761 |
| P04083 | Annexin A1                                          | ANXA1    | 1.146E+11 | -4.73363 |
| O43865 | Putative adenosylhomocysteinase 2                   | AHCYL1   | 395110000 | -4.72158 |
| Q01518 | Adenylyl cyclase-associated protein 1               | CAP1     | 1.082E+10 | -4.71224 |
| O00429 | Dynamin-1-like protein                              | DNM1L    | 3.955E+09 | -4.71217 |
| P16070 | CD44 antigen                                        | CD44     | 3.429E+09 | -4.70581 |
| P26885 | Peptidyl-prolyl cis-trans isomerase FKBP2           | FKBP2    | 936440000 | -4.69129 |
| Q6IBS0 | Twinfilin-2                                         | TWF2     | 3.029E+09 | -4.68635 |
| Q13637 | Ras-related protein Rab-32                          | RAB32    | 483930000 | -4.67668 |
| Q9NZM1 | Myoferlin                                           | MYOF     | 4.735E+09 | -4.6746  |
| Q08257 | Quinone oxidoreductase                              | CRYZ     | 1.604E+09 | -4.67431 |
| Q8NBJ5 | Procollagen galactosyltransferase 1                 | COLGALT1 | 689010000 | -4.67425 |
| O94804 | Serine/threonine-protein kinase 10                  | STK10    | 154860000 | -4.66536 |
| Q13098 | COP9 signalosome complex subunit 1                  | GPS1     | 1.389E+09 | -4.65456 |
| P55145 | Mesencephalic astrocyte-derived neurotrophic fac    | MANF     | 1.698E+09 | -4.64859 |
| O00469 | Procollagen-lysine,2-oxoglutarate 5-dioxygenase 2   | PLOD2    | 1.211E+09 | -4.63555 |
| Q96I99 | Succinyl-CoA ligase [GDP-forming] subunit beta, m   | SUCLG2   | 2.209E+09 | -4.62718 |
| Q8WUM4 | Programmed cell death 6-interacting protein         | PDCD6IP  | 7.906E+09 | -4.6212  |
| O76003 | Glutaredoxin-3                                      | GLRX3    | 5.337E+09 | -4.59833 |
| P36871 | Phosphoglucomutase-1                                | PGM1     | 4.057E+09 | -4.59084 |
| P30048 | Thioredoxin-dependent peroxide reductase, mitoc     | PRDX3    | 2.892E+09 | -4.58698 |
| P99999 | Cytochrome c                                        | CYCS     | 8.665E+09 | -4.57955 |
| P04080 | Cystatin-B                                          | CSTB     | 3.623E+09 | -4.56674 |
| Q9H2M9 | Rab3 GTPase-activating protein non-catalytic subu   | RAB3GAP2 | 522760000 | -4.56535 |
| Q99615 | DnaJ homolog subfamily C member 7                   | DNAJC7   | 1.322E+09 | -4.56179 |
| Q8TEX9 | Importin-4                                          | IPO4     | 3.558E+09 | -4.55321 |
| P48735 | Isocitrate dehydrogenase [NADP], mitochondrial      | IDH2     | 2.251E+09 | -4.54768 |
| P38606 | V-type proton ATPase catalytic subunit A            | ATP6V1A  | 5.357E+09 | -4.54341 |
| P46734 | Dual specificity mitogen-activated protein kinase k | MAP2K3   | 370110000 | -4.53675 |
| O60869 | Endothelial differentiation-related factor 1        | EDF1     | 760850000 | -4.53417 |
| P61923 | Coatomer subunit zeta-1                             | COPZ1    | 1.009E+09 | -4.52907 |

|            |                                                                   |               |           |          |
|------------|-------------------------------------------------------------------|---------------|-----------|----------|
| P50570     | Dynammin-2                                                        | DNM2          | 3.451E+09 | -4.5274  |
| P49755     | Transmembrane emp24 domain-containing protein                     | TMED10        | 5.648E+09 | -4.5265  |
| P10768     | S-formylglutathione hydrolase                                     | ESD           | 1.984E+09 | -4.51296 |
| P08134     | Rho-related GTP-binding protein RhoC                              | RHOC          | 95490000  | -4.51256 |
| Q7Z6Z7     | E3 ubiquitin-protein ligase HUWE1                                 | HUWE1         | 3.315E+09 | -4.5095  |
| P30101     | Protein disulfide-isomerase A3                                    | PDIA3         | 2.708E+10 | -4.48902 |
| P60174     | Triosephosphate isomerase                                         | TPI1          | 8.067E+10 | -4.48844 |
| O75663     | TIP41-like protein                                                | TIPRL         | 1.456E+09 | -4.48349 |
| Q15056     | Eukaryotic translation initiation factor 4H                       | EIF4H         | 4.547E+09 | -4.48021 |
| Q12792     | Twinfilin-1                                                       | TWF1          | 1.458E+09 | -4.47528 |
| O15145     | Actin-related protein 2/3 complex subunit 3                       | ARPC3         | 2.052E+09 | -4.46813 |
| Q14232     | Translation initiation factor eIF-2B subunit alpha                | EIF2B1        | 844020000 | -4.46227 |
| Q9BT78     | COP9 signalosome complex subunit 4                                | COPS4         | 973670000 | -4.45671 |
| P33121     | Long-chain-fatty-acid--CoA ligase 1                               | ACSL1         | 386230000 | -4.45537 |
| P17812     | CTP synthase 1                                                    | CTPS1         | 6.296E+09 | -4.45501 |
| O75390     | Citrate synthase, mitochondrial                                   | CS            | 1.426E+10 | -4.4406  |
| P00338     | L-lactate dehydrogenase A chain                                   | LDHA          | 9.252E+10 | -4.43821 |
| Q8WW12     | PEST proteolytic signal-containing nuclear protein                | PCNP          | 617310000 | -4.42502 |
| Q13492     | Phosphatidylinositol-binding clathrin assembly protein            | PICALM        | 601810000 | -4.4213  |
| Q07960     | Rho GTPase-activating protein 1                                   | ARHGAP1       | 3.902E+09 | -4.42007 |
| P51812     | Ribosomal protein S6 kinase alpha-3                               | RPS6KA3       | 1.173E+09 | -4.41837 |
| P61158     | Actin-related protein 3                                           | ACTR3         | 5.246E+09 | -4.40197 |
| P15121     | Aldose reductase                                                  | AKR1B1        | 8.691E+09 | -4.39534 |
| P09622     | Dihydropyridin dehydrogenase, mitochondrial                       | DLD           | 2.112E+09 | -4.39425 |
| Q15758     | Neutral amino acid transporter B(0)                               | SLC1A5        | 1.837E+09 | -4.37978 |
| P19367     | Hexokinase-1                                                      | HK1           | 1.217E+10 | -4.37424 |
| P14625     | Endoplasmic reticulum chaperone protein                           | HSP90B1       | 4.314E+10 | -4.36557 |
| Q9HDC9     | Adipocyte plasma membrane-associated protein                      | APMAP         | 1.362E+09 | -4.34251 |
| Q9UBT2     | SUMO-activating enzyme subunit 2                                  | UBA2          | 3.422E+09 | -4.33941 |
| P08758     | Annexin A5                                                        | ANXA5         | 5.775E+10 | -4.33089 |
| Q9NR45     | Sialic acid synthase                                              | NANS          | 1.781E+09 | -4.32673 |
| P35237     | Serpin B6                                                         | SERPINB6      | 1.618E+09 | -4.32501 |
| P37837     | Transaldolase                                                     | TALDO1        | 3.515E+09 | -4.32388 |
| Q13177     | Serine/threonine-protein kinase PAK 2;PAK-2p27;F PAK2             | PAK2          | 1.475E+09 | -4.314   |
| P49321     | Nuclear autoantigenic sperm protein                               | NASP          | 4.607E+09 | -4.30439 |
| Q70E73     | Ras-associated and pleckstrin homology domains-containing protein | RAPH1         | 222330000 | -4.30406 |
| P29144     | Tripeptidyl-peptidase 2                                           | TPP2          | 1.104E+09 | -4.30023 |
| P33991     | DNA replication licensing factor MCM4                             | MCM4          | 7.06E+09  | -4.29078 |
| Q9UNZ2     | NSFL1 cofactor p47                                                | NSFL1C        | 912730000 | -4.28765 |
| O00299     | Chloride intracellular channel protein 1                          | CLIC1         | 8.35E+09  | -4.25185 |
| Q9H3S7     | Tyrosine-protein phosphatase non-receptor type 2                  | PTPN23        | 715300000 | -4.24738 |
| P00491     | Purine nucleoside phosphorylase                                   | PNP           | 5.641E+09 | -4.24285 |
| Q16836     | Hydroxyacyl-coenzyme A dehydrogenase, mitochondrial               | HADH          | 2.802E+09 | -4.24259 |
| P13797     | Plastin-3                                                         | PLS3          | 1.108E+10 | -4.23319 |
| O75717     | WD repeat and HMG-box DNA-binding protein 1                       | WDHD1         | 822040000 | -4.23254 |
| P54920     | Alpha-soluble NSF attachment protein                              | NAPA          | 1.475E+09 | -4.22981 |
| Q8TC12     | Retinol dehydrogenase 11                                          | RDH11         | 1.085E+09 | -4.22768 |
| P51149     | Ras-related protein Rab-7a                                        | RAB7A         | 5.376E+09 | -4.2232  |
| P07355;A6I | Annexin A2;Putative annexin A2-like protein                       | ANXA2;ANXA2P2 | 6.979E+10 | -4.21844 |
| P06703     | Protein S100-A6                                                   | S100A6        | 469620000 | -4.21837 |

|        |                                                                       |          |           |          |
|--------|-----------------------------------------------------------------------|----------|-----------|----------|
| P54819 | Adenylate kinase 2, mitochondrial;Adenylate kinas AK2                 |          | 3.032E+09 | -4.20613 |
| P23921 | Ribonucleoside-diphosphate reductase large subunit RRM1               |          | 1.75E+09  | -4.20428 |
| P13693 | Translationally-controlled tumor protein                              | TPT1     | 8.013E+09 | -4.20385 |
| Q13620 | Cullin-4B                                                             | CUL4B    | 1.882E+09 | -4.19271 |
| Q9HC35 | Echinoderm microtubule-associated protein-like 4                      | EML4     | 799120000 | -4.18886 |
| P22102 | Trifunctional purine biosynthetic protein adenosine GART              |          | 8.464E+09 | -4.18484 |
| P40926 | Malate dehydrogenase, mitochondrial                                   | MDH2     | 2.487E+10 | -4.1747  |
| P40925 | Malate dehydrogenase, cytoplasmic                                     | MDH1     | 8.917E+09 | -4.16784 |
| O15498 | Synaptobrevin homolog YKT6                                            | YKT6     | 583660000 | -4.16748 |
| P46939 | Utrophin                                                              | UTRN     | 535060000 | -4.16267 |
| Q12931 | Heat shock protein 75 kDa, mitochondrial                              | TRAP1    | 4.923E+09 | -4.16255 |
| Q13057 | Bifunctional coenzyme A synthase;Phosphopantetheinyl COASY            |          | 1.125E+09 | -4.14733 |
| O43681 | ATPase ASNA1                                                          | ASNA1    | 1.872E+09 | -4.14513 |
| Q99714 | 3-hydroxyacyl-CoA dehydrogenase type-2                                | HSD17B10 | 8.081E+09 | -4.14173 |
| Q92879 | CUGBP Elav-like family member 1                                       | CELF1    | 649190000 | -4.13826 |
| Q16555 | Dihydropyrimidinase-related protein 2                                 | DPYSL2   | 9.799E+09 | -4.12942 |
| Q01105 | Protein SET                                                           | SET      | 1.15E+10  | -4.12471 |
| O00116 | Alkyl-dihydroxyacetonephosphate synthase, peroxisomal AGPS            |          | 1.141E+09 | -4.12441 |
| Q9P2R3 | Rabankyrin-5                                                          | ANKFY1   | 918880000 | -4.12122 |
| P61201 | COP9 signalosome complex subunit 2                                    | COPS2    | 1.978E+09 | -4.1177  |
| O14745 | Na(+)/H(+) exchange regulatory cofactor NHE-RF1                       | SLC9A3R1 | 403760000 | -4.11566 |
| Q14195 | Dihydropyrimidinase-related protein 3                                 | DPYSL3   | 2.334E+09 | -4.0995  |
| P21281 | V-type proton ATPase subunit B, brain isoform                         | ATP6V1B2 | 2.418E+09 | -4.08246 |
| Q9P2I0 | Cleavage and polyadenylation specificity factor subunit CPSF2         |          | 414220000 | -4.07408 |
| Q92520 | Protein FAM3C                                                         | FAM3C    | 621480000 | -4.06964 |
| P62937 | Peptidyl-prolyl cis-trans isomerase A;Peptidyl-prolyl isomerase PPIA  |          | 5.398E+10 | -4.06841 |
| Q96HE7 | ERO1-like protein alpha                                               | ERO1L    | 3.228E+09 | -4.06431 |
| P45974 | Ubiquitin carboxyl-terminal hydrolase 5                               | USP5     | 6.731E+09 | -4.05964 |
| Q9H553 | Alpha-1,3/1,6-mannosyltransferase ALG2                                | ALG2     | 228400000 | -4.05523 |
| P41214 | Eukaryotic translation initiation factor 2D                           | EIF2D    | 462520000 | -4.05226 |
| Q9H3K6 | BOLA-like protein 2                                                   | BOLA2    | 922480000 | -4.05141 |
| Q9NX40 | OCIA domain-containing protein 1                                      | OCIAD1   | 744330000 | -4.05044 |
| P52565 | Rho GDP-dissociation inhibitor 1                                      | ARHGDI1  | 1.175E+10 | -4.04593 |
| O14976 | Cyclin-G-associated kinase                                            | GAK      | 285730000 | -4.0265  |
| P51610 | Host cell factor 1;HCF N-terminal chain 1;HCF N-terminal HCFC1        |          | 1.579E+09 | -4.02442 |
| P13667 | Protein disulfide-isomerase A4                                        | PDIA4    | 1.553E+10 | -4.01938 |
| Q96KP4 | Cytosolic non-specific dipeptidase                                    | CNDP2    | 1.721E+09 | -4.01513 |
| P26639 | Threonine--tRNA ligase, cytoplasmic                                   | TARS     | 6.358E+09 | -4.0147  |
| P46109 | Crk-like protein                                                      | CRKL     | 1.551E+09 | -4.01014 |
| Q9Y2V2 | Calcium-regulated heat stable protein 1                               | CARHSP1  | 636030000 | -4.0048  |
| Q6UB35 | Monofunctional C1-tetrahydrofolate synthase, mitochondrial MTHFD1L    |          | 1.035E+09 | -4.0012  |
| Q14847 | LIM and SH3 domain protein 1                                          | LASP1    | 2.142E+09 | -3.98465 |
| Q9H0U4 | Ras-related protein Rab-1B                                            | RAB1B    | 2.498E+09 | -3.98299 |
| Q86XL3 | Ankyrin repeat and LEM domain-containing protein ANKLE2               |          | 173000000 | -3.982   |
| P49748 | Very long-chain specific acyl-CoA dehydrogenase, mitochondrial ACADVL |          | 3.157E+09 | -3.98102 |
| P39748 | Flap endonuclease 1                                                   | FEN1     | 4.392E+09 | -3.97409 |
| Q86VP6 | Cullin-associated NEDD8-dissociated protein 1                         | CAND1    | 9.525E+09 | -3.94897 |
| Q9BSF4 | Uncharacterized protein C19orf52                                      | C19orf52 | 302400000 | -3.9443  |
| P05556 | Integrin beta-1                                                       | ITGB1    | 5.518E+09 | -3.932   |
| P14618 | Pyruvate kinase PKM                                                   | PKM      | 2.043E+11 | -3.92699 |

|        |                                                           |         |           |          |
|--------|-----------------------------------------------------------|---------|-----------|----------|
| O75521 | Enoyl-CoA delta isomerase 2, mitochondrial                | ECI2    | 1.013E+09 | -3.92571 |
| Q96EK9 | Protein KTI12 homolog                                     | KTI12   | 206690000 | -3.91627 |
| Q6DD88 | Atlantin-3                                                | ATL3    | 2.858E+09 | -3.91529 |
| P27361 | Mitogen-activated protein kinase 3                        | MAPK3   | 1.699E+09 | -3.91279 |
| Q9Y3B3 | Transmembrane emp24 domain-containing protein             | TMED7   | 163510000 | -3.90994 |
| Q709C8 | Vacuolar protein sorting-associated protein 13C           | VPS13C  | 143710000 | -3.90364 |
| Q9UBF2 | Coatomer subunit gamma-2                                  | COPG2   | 1.093E+09 | -3.90278 |
| Q9NQW6 | Actin-binding protein anillin                             | ANLN    | 169360000 | -3.88975 |
| P04075 | Fructose-bisphosphate aldolase A                          | ALDOA   | 5.843E+10 | -3.88923 |
| P07099 | Epoxide hydrolase 1                                       | EPHX1   | 2.001E+09 | -3.88224 |
| O60763 | General vesicular transport factor p115                   | USO1    | 3.61E+09  | -3.86852 |
| Q13085 | Acetyl-CoA carboxylase 1;Biotin carboxylase               | ACACA   | 508400000 | -3.86044 |
| Q93008 | Probable ubiquitin carboxyl-terminal hydrolase FAI        | USP9X   | 1.516E+09 | -3.85834 |
| Q5VYK3 | Proteasome-associated protein ECM29 homolog               | ECM29   | 3.122E+09 | -3.85314 |
| Q9BZZ5 | Apoptosis inhibitor 5                                     | API5    | 1.818E+09 | -3.85103 |
| Q9Y490 | Talin-1                                                   | TLN1    | 4.636E+10 | -3.85041 |
| P60903 | Protein S100-A10                                          | S100A10 | 904620000 | -3.84814 |
| P54578 | Ubiquitin carboxyl-terminal hydrolase 14                  | USP14   | 2.43E+09  | -3.83602 |
| P61604 | 10 kDa heat shock protein, mitochondrial                  | HSPE1   | 4.234E+09 | -3.8312  |
| P34932 | Heat shock 70 kDa protein 4                               | HSPA4   | 1.613E+10 | -3.81425 |
| Q14697 | Neutral alpha-glucosidase AB                              | GANAB   | 1.779E+10 | -3.81384 |
| P22307 | Non-specific lipid-transfer protein                       | SCP2    | 753750000 | -3.80753 |
| P36776 | Lon protease homolog, mitochondrial                       | LONP1   | 8.144E+09 | -3.7876  |
| P13861 | cAMP-dependent protein kinase type II-alpha regu          | PRKAR2A | 1.83E+09  | -3.77454 |
| Q07954 | Prolow-density lipoprotein receptor-related protei        | LRP1    | 3.399E+09 | -3.77177 |
| Q13033 | Striatin-3                                                | STRN3   | 449430000 | -3.76837 |
| Q96AC1 | Fermitin family homolog 2                                 | FERMT2  | 1.312E+09 | -3.76831 |
| P18754 | Regulator of chromosome condensation                      | RCC1    | 628420000 | -3.76705 |
| P24928 | DNA-directed RNA polymerase II subunit RPB1               | POLR2A  | 350190000 | -3.72101 |
| Q9UI09 | NADH dehydrogenase [ubiquinone] 1 alpha subcor            | NDUFA12 | 429480000 | -3.71784 |
| Q02790 | Peptidyl-prolyl cis-trans isomerase FKBP4;Peptidyl- FKBP4 |         | 4.696E+09 | -3.71465 |
| Q16831 | Uridine phosphorylase 1                                   | UPP1    | 188990000 | -3.70934 |
| O94826 | Mitochondrial import receptor subunit TOM70               | TOMM70A | 1.737E+09 | -3.70411 |
| Q96KB5 | Lymphokine-activated killer T-cell-originated prote       | PBK     | 276310000 | -3.70159 |
| Q99829 | Copine-1                                                  | CPNE1   | 2.896E+09 | -3.66665 |
| Q9UBW8 | COP9 signalosome complex subunit 7a                       | COPS7A  | 758500000 | -3.66545 |
| P60953 | Cell division control protein 42 homolog                  | CDC42   | 1.196E+09 | -3.66395 |
| O14964 | Hepatocyte growth factor-regulated tyrosine kinas         | HGS     | 815260000 | -3.66178 |
| P51452 | Dual specificity protein phosphatase 3                    | DUSP3   | 822690000 | -3.65793 |
| P00505 | Aspartate aminotransferase, mitochondrial                 | GOT2    | 5.033E+09 | -3.65437 |
| Q15942 | Zyxin                                                     | ZYX     | 2.511E+09 | -3.65319 |
| P35613 | Basigin                                                   | BSG     | 3.045E+09 | -3.6503  |
| P17931 | Galectin-3                                                | LGALS3  | 160130000 | -3.64963 |
| Q01085 | Nucleolysin TIAR                                          | TIAL1   | 603170000 | -3.64962 |
| P06733 | Alpha-enolase                                             | ENO1    | 1.599E+11 | -3.64063 |
| Q00688 | Peptidyl-prolyl cis-trans isomerase FKBP3                 | FKBP3   | 1.2E+09   | -3.6328  |
| Q9Y696 | Chloride intracellular channel protein 4                  | CLIC4   | 3.143E+09 | -3.63266 |
| P54727 | UV excision repair protein RAD23 homolog B                | RAD23B  | 1.892E+09 | -3.63194 |
| P15170 | Eukaryotic peptide chain release factor GTP-bindin        | GSPT1   | 2.632E+09 | -3.63126 |
| Q9BUL8 | Programmed cell death protein 10                          | PDCD10  | 782200000 | -3.62834 |

|           |                                                     |             |           |          |
|-----------|-----------------------------------------------------|-------------|-----------|----------|
| Q6UWE0    | E3 ubiquitin-protein ligase LRSAM1                  | LRSAM1      | 217520000 | -3.62804 |
| Q9H1E3    | Nuclear ubiquitous casein and cyclin-dependent ki   | NUCKS1      | 1.291E+09 | -3.62784 |
| P49023    | Paxillin                                            | PXN         | 1.915E+09 | -3.6267  |
| Q05682    | Caldesmon                                           | CALD1       | 1.492E+09 | -3.62199 |
| Q16658    | Fascin                                              | FSCN1       | 4.039E+09 | -3.61437 |
| O43156    | TELO2-interacting protein 1 homolog                 | TTI1        | 288310000 | -3.60957 |
| Q92905    | COP9 signalosome complex subunit 5                  | COP55       | 1.015E+09 | -3.597   |
| P54886    | Delta-1-pyrroline-5-carboxylate synthase;Glutama    | ALDH18A1    | 2.718E+09 | -3.58144 |
| P21283    | V-type proton ATPase subunit C 1                    | ATP6V1C1    | 935790000 | -3.57845 |
| P61077    | Ubiquitin-conjugating enzyme E2 D3                  | UBE2D3      | 719010000 | -3.5746  |
| P50851    | Lipopolysaccharide-responsive and beige-like anch   | LRBA        | 307710000 | -3.57065 |
| O00410    | Importin-5                                          | IPO5        | 1.608E+10 | -3.5706  |
| P07900    | Heat shock protein HSP 90-alpha                     | HSP90AA1    | 1.158E+11 | -3.56944 |
| Q15437    | Protein transport protein Sec23B                    | SEC23B      | 754660000 | -3.56437 |
| P12110    | Collagen alpha-2(VI) chain                          | COL6A2      | 411710000 | -3.56349 |
| Q04917    | 14-3-3 protein eta                                  | YWHAH       | 3.102E+09 | -3.55367 |
| Q7Z460    | CLIP-associating protein 1                          | CLASP1      | 267260000 | -3.55123 |
| P22392;O6 | Nucleoside diphosphate kinase B;Putative nucleosi   | NME2;NME2P1 | 2.413E+10 | -3.55119 |
| P01911    | HLA class II histocompatibility antigen, DRB1-15 be | HLA-DRB1    | 387830000 | -3.54149 |
| P34897    | Serine hydroxymethyltransferase, mitochondrial      | SHMT2       | 6.545E+09 | -3.53403 |
| Q96QK1    | Vacuolar protein sorting-associated protein 35      | VPS35       | 5.34E+09  | -3.51499 |
| P11717    | Cation-independent mannose-6-phosphate recept       | IGF2R       | 911840000 | -3.50321 |
| Q9NYA1    | Sphingosine kinase 1                                | SPHK1       | 96197000  | -3.49605 |
| Q3KQV9    | UDP-N-acetylhexosamine pyrophosphorylase-like       | UAP1L1      | 1.15E+09  | -3.47845 |
| P30086    | Phosphatidylethanolamine-binding protein 1;Hippi    | PEBP1       | 8.565E+09 | -3.4688  |
| P31946    | 14-3-3 protein beta/alpha;14-3-3 protein beta/alpl  | YWHAH       | 1.001E+10 | -3.4528  |
| P08473    | Neprilysin                                          | MME         | 181880000 | -3.45134 |
| O95197    | Reticulon-3                                         | RTN3        | 429120000 | -3.44708 |
| Q16851    | UTP--glucose-1-phosphate uridylyltransferase        | UGP2        | 2.5E+09   | -3.4379  |
| Q92734    | Protein TFG                                         | TFG         | 1.056E+09 | -3.4336  |
| Q9NUP9    | Protein lin-7 homolog C                             | LIN7C       | 199710000 | -3.4326  |
| Q9Y2B0    | Protein canopy homolog 2                            | CNPY2       | 1.089E+09 | -3.43254 |
| P48509    | CD151 antigen                                       | CD151       | 85623000  | -3.42826 |
| Q9BXJ9    | N-alpha-acetyltransferase 15, NatA auxiliary subun  | NAA15       | 3.332E+09 | -3.4262  |
| Q15365    | Poly(rC)-binding protein 1                          | PCBP1       | 1.4E+10   | -3.41873 |
| O95456    | Proteasome assembly chaperone 1                     | PSMG1       | 497360000 | -3.41864 |
| Q9BSJ8    | Extended synaptotagmin-1                            | ESYT1       | 5.149E+09 | -3.40915 |
| P26006    | Integrin alpha-3;Integrin alpha-3 heavy chain;Integ | ITGA3       | 3.172E+09 | -3.40762 |
| O43719    | HIV Tat-specific factor 1                           | HTATSF1     | 768340000 | -3.40605 |
| Q15084    | Protein disulfide-isomerase A6                      | PDIA6       | 1.397E+10 | -3.4041  |
| P12004    | Proliferating cell nuclear antigen                  | PCNA        | 7.717E+09 | -3.39364 |
| Q04323    | UBX domain-containing protein 1                     | UBXN1       | 1.111E+09 | -3.39269 |
| Q8N1G4    | Leucine-rich repeat-containing protein 47           | LRRC47      | 624940000 | -3.38966 |
| O00232    | 26S proteasome non-ATPase regulatory subunit 12     | PSMD12      | 7.525E+09 | -3.37452 |
| O15143    | Actin-related protein 2/3 complex subunit 1B        | ARPC1B      | 1.234E+09 | -3.37413 |
| Q9NVD7    | Alpha-parvin                                        | PARVA       | 693800000 | -3.37376 |
| P13639    | Elongation factor 2                                 | EEF2        | 1.124E+11 | -3.36408 |
| O95433    | Activator of 90 kDa heat shock protein ATPase hon   | AHSA1       | 7.859E+09 | -3.36086 |
| Q9HA77    | Probable cysteine--tRNA ligase, mitochondrial       | CARS2       | 726290000 | -3.35853 |
| P50454    | Serpin H1                                           | SERPINH1    | 6.178E+09 | -3.35636 |

|           |                                                     |              |           |          |
|-----------|-----------------------------------------------------|--------------|-----------|----------|
| P61026    | Ras-related protein Rab-10                          | RAB10        | 1.961E+09 | -3.34233 |
| P08243    | Asparagine synthetase [glutamine-hydrolyzing]       | ASNS         | 1.932E+09 | -3.33939 |
| Q9BSH4    | Translational activator of cytochrome c oxidase 1   | TACO1        | 823850000 | -3.33878 |
| P27797    | Calreticulin                                        | CALR         | 3.09E+10  | -3.33278 |
| Q14C86    | GTPase-activating protein and VPS9 domain-contai    | GAPVD1       | 1.111E+09 | -3.31002 |
| P49189    | 4-trimethylaminobutyraldehyde dehydrogenase         | ALDH9A1      | 804540000 | -3.30978 |
| Q96C19    | EF-hand domain-containing protein D2                | EFHD2        | 697240000 | -3.30788 |
| P46459    | Vesicle-fusing ATPase                               | NSF          | 2.724E+09 | -3.30651 |
| P13073    | Cytochrome c oxidase subunit 4 isoform 1, mitoch    | COX4I1       | 2.03E+09  | -3.29809 |
| O75116    | Rho-associated protein kinase 2                     | ROCK2        | 482810000 | -3.2961  |
| P27348    | 14-3-3 protein theta                                | YWHAQ        | 6.911E+09 | -3.29423 |
| Q7Z3B4    | Nucleoporin p54                                     | NUP54        | 330960000 | -3.28797 |
| Q14247    | Src substrate cortactin                             | CTTN         | 5.813E+09 | -3.28778 |
| Q9UNS2    | COP9 signalosome complex subunit 3                  | COPS3        | 1.39E+09  | -3.28769 |
| Q99832    | T-complex protein 1 subunit eta                     | CCT7         | 1.805E+10 | -3.27878 |
| P13473    | Lysosome-associated membrane glycoprotein 2         | LAMP2        | 1.466E+09 | -3.27688 |
| Q2M2I8    | AP2-associated protein kinase 1                     | AAK1         | 283270000 | -3.27452 |
| P00492    | Hypoxanthine-guanine phosphoribosyltransferase      | HPRT1        | 5.031E+09 | -3.27374 |
| P22234    | Multifunctional protein ADE2;Phosphoribosylamin     | PAICS        | 9.656E+09 | -3.26723 |
| P10155    | 60 kDa SS-A/Ro ribonucleoprotein                    | TROVE2       | 1.224E+09 | -3.26712 |
| Q9BVK6    | Transmembrane emp24 domain-containing protei        | TMED9        | 1.273E+09 | -3.26621 |
| Q96TA1    | Niban-like protein 1                                | FAM129B      | 7.402E+09 | -3.26496 |
| Q9BZQ8    | Protein Niban                                       | FAM129A      | 3.284E+09 | -3.2616  |
| P61758    | Prefoldin subunit 3                                 | VBP1         | 2.1E+09   | -3.25849 |
| P27824    | Calnexin                                            | CANX         | 1.215E+10 | -3.25764 |
| Q9Y6D5    | Brefeldin A-inhibited guanine nucleotide-exchange   | ARFGEF2      | 449220000 | -3.25274 |
| P61163    | Alpha-centractin                                    | ACTR1A       | 6.007E+09 | -3.24707 |
| Q9HB71    | Calcyclin-binding protein                           | CACYBP       | 5.409E+09 | -3.24545 |
| O95801    | Tetratricopeptide repeat protein 4                  | TTC4         | 436710000 | -3.24207 |
| O43432    | Eukaryotic translation initiation factor 4 gamma 3  | EIF4G3       | 342700000 | -3.24165 |
| P61019    | Ras-related protein Rab-2A                          | RAB2A        | 2.573E+09 | -3.23828 |
| Q00765    | Receptor expression-enhancing protein 5             | REEP5        | 510290000 | -3.23823 |
| P49419    | Alpha-aminoacidic semialdehyde dehydrogenase        | ALDH7A1      | 1.889E+09 | -3.22945 |
| Q9H4A3    | Serine/threonine-protein kinase WNK1                | WNK1         | 261730000 | -3.22821 |
| Q13526    | Peptidyl-prolyl cis-trans isomerase NIMA-interactir | PIN1         | 744220000 | -3.22436 |
| P62826    | GTP-binding nuclear protein Ran                     | RAN          | 1.095E+10 | -3.22231 |
| P39687    | Acidic leucine-rich nuclear phosphoprotein 32 fam   | ANP32A       | 2.368E+09 | -3.21397 |
| O75915    | PRA1 family protein 3                               | ARL6IP5      | 2.568E+09 | -3.21345 |
| Q8NBS9    | Thioredoxin domain-containing protein 5             | TXNDC5       | 3.814E+09 | -3.20303 |
| P35658    | Nuclear pore complex protein Nup214                 | NUP214       | 358270000 | -3.19995 |
| P54709    | Sodium/potassium-transporting ATPase subunit bε     | ATP1B3       | 3.26E+09  | -3.19926 |
| P50995    | Annexin A11                                         | ANXA11       | 519530000 | -3.19693 |
| P61088;Q5 | Ubiquitin-conjugating enzyme E2 N;Putative ubiqu    | UBE2N;UBE2NL | 687430000 | -3.19643 |
| Q9NTK5    | Obg-like ATPase 1                                   | OLA1         | 5.392E+09 | -3.19336 |
| Q15642    | Cdc42-interacting protein 4                         | TRIP10       | 622610000 | -3.18586 |
| Q86VS8    | Protein Hook homolog 3                              | HOOK3        | 505230000 | -3.18107 |
| P13798    | Acylamino-acid-releasing enzyme                     | APEH         | 2.097E+09 | -3.17422 |
| Q7KZF4    | Staphylococcal nuclease domain-containing protei    | SND1         | 1.317E+10 | -3.17234 |
| O95299    | NADH dehydrogenase [ubiquinone] 1 alpha subcor      | NDUFA10      | 1.47E+09  | -3.15975 |
| Q56VL3    | OCIA domain-containing protein 2                    | OCIAD2       | 1.463E+09 | -3.15742 |

|           |                                                           |               |           |          |
|-----------|-----------------------------------------------------------|---------------|-----------|----------|
| Q9Y2W2    | WW domain-binding protein 11                              | WBP11         | 335590000 | -3.15513 |
| P20337    | Ras-related protein Rab-3B                                | RAB3B         | 1.043E+09 | -3.15365 |
| P61586    | Transforming protein RhoA                                 | RHOA          | 2.585E+09 | -3.15324 |
| P84077;P6 | ADP-ribosylation factor 1;ADP-ribosylation factor 3       | ARF1;ARF3     | 1.547E+10 | -3.14319 |
| Q15366    | Poly(rC)-binding protein 2                                | PCBP2         | 8.295E+09 | -3.14102 |
| P08754    | Guanine nucleotide-binding protein G(k) subunit alpha     | GNAI3         | 1.473E+09 | -3.13951 |
| P07237    | Protein disulfide-isomerase                               | P4HB          | 2.8E+10   | -3.13384 |
| O15355    | Protein phosphatase 1G                                    | PPM1G         | 2.117E+09 | -3.12565 |
| P55809    | Succinyl-CoA:3-ketoacid coenzyme A transferase 1          | OXCT1         | 2.458E+09 | -3.12403 |
| Q16799    | Reticulon-1                                               | RTN1          | 313620000 | -3.12044 |
| Q9NYU2    | UDP-glucose:glycoprotein glucosyltransferase 1            | UGGT1         | 3.67E+09  | -3.10907 |
| O75083    | WD repeat-containing protein 1                            | WDR1          | 9.679E+09 | -3.10899 |
| P08238    | Heat shock protein HSP 90-beta                            | HSP90AB1      | 6.076E+10 | -3.10136 |
| O43847    | Nardilysin                                                | NRD1          | 701660000 | -3.08654 |
| P38117    | Electron transfer flavoprotein subunit beta               | ETFB          | 2.395E+09 | -3.08046 |
| P15153    | Ras-related C3 botulinum toxin substrate 2                | RAC2          | 1.047E+09 | -3.07747 |
| O00154    | Cytosolic acyl coenzyme A thioester hydrolase             | ACOT7         | 1.366E+09 | -3.066   |
| Q13838    | Spliceosome RNA helicase DDX39B                           | DDX39B        | 4.81E+09  | -3.06181 |
| Q9NWW4    | UPF0587 protein C1orf123                                  | C1orf123      | 507210000 | -3.05969 |
| P12081    | Histidine--tRNA ligase, cytoplasmic                       | HARS          | 3.604E+09 | -3.05955 |
| Q9NSE4    | Isoleucine--tRNA ligase, mitochondrial                    | IARS2         | 1.296E+09 | -3.04686 |
| Q5JRX3    | Presequence protease, mitochondrial                       | PITRM1        | 1.432E+09 | -3.04668 |
| Q96FW1    | Ubiquitin thioesterase OTUB1                              | OTUB1         | 2.188E+09 | -3.04443 |
| P00441    | Superoxide dismutase [Cu-Zn]                              | SOD1          | 2.919E+09 | -3.04423 |
| Q86V21    | Acetoacetyl-CoA synthetase                                | AACS          | 161670000 | -3.0425  |
| Q01813    | ATP-dependent 6-phosphofructokinase, platelet type        | PFKP          | 7.242E+09 | -3.03493 |
| Q9NQC3    | Reticulon-4                                               | RTN4          | 9.273E+09 | -3.0319  |
| O60502    | Protein O-GlcNAcase                                       | MGEA5         | 617710000 | -3.02967 |
| P08195    | 4F2 cell-surface antigen heavy chain                      | SLC3A2        | 1.812E+09 | -3.02929 |
| Q9Y2L1    | Exosome complex exonuclease RRP44                         | DIS3          | 2.033E+09 | -3.02317 |
| P61160    | Actin-related protein 2                                   | ACTR2         | 3.611E+09 | -3.01803 |
| Q92973    | Transportin-1                                             | TNPO1         | 3.247E+09 | -3.0157  |
| Q9H2U2    | Inorganic pyrophosphatase 2, mitochondrial                | PPA2          | 1.152E+09 | -3.01543 |
| P61106    | Ras-related protein Rab-14                                | RAB14         | 1.226E+09 | -3.01502 |
| Q7L5N1    | COP9 signalosome complex subunit 6                        | COPS6         | 970130000 | -3.01423 |
| Q15006    | ER membrane protein complex subunit 2                     | EMC2          | 936910000 | -3.00722 |
| Q9BQ52    | Zinc phosphodiesterase ELAC protein 2                     | ELAC2         | 774340000 | -2.99696 |
| Q8TCT9    | Minor histocompatibility antigen H13                      | HM13          | 1.703E+09 | -2.99045 |
| P33316    | Deoxyuridine 5-triphosphate nucleotidohydrolase, DUT      |               | 4.022E+09 | -2.98642 |
| O75306    | NADH dehydrogenase [ubiquinone] iron-sulfur protein       | NDUFS2        | 1.612E+09 | -2.98605 |
| Q15907;P6 | Ras-related protein Rab-11B;Ras-related protein Rab-11A   | RAB11B;RAB11A | 2.22E+09  | -2.98084 |
| P36551    | Oxygen-dependent coproporphyrinogen-III oxidase           | CPOX          | 977030000 | -2.97767 |
| O60499    | Syntaxin-10                                               | STX10         | 161540000 | -2.97667 |
| P28340    | DNA polymerase delta catalytic subunit                    | POLD1         | 635050000 | -2.9756  |
| Q9UKF6    | Cleavage and polyadenylation specificity factor subunit 3 | CPSF3         | 1.023E+09 | -2.96998 |
| Q9Y5X1    | Sorting nexin-9                                           | SNX9          | 388290000 | -2.95908 |
| Q9P289    | Serine/threonine-protein kinase 26                        | STK26         | 761070000 | -2.95624 |
| Q92544    | Transmembrane 9 superfamily member 4                      | TM9SF4        | 1.445E+09 | -2.94598 |
| P08559    | Pyruvate dehydrogenase E1 component subunit alpha         | PDHA1         | 2.225E+09 | -2.93253 |
| P18564    | Integrin beta-6                                           | ITGB6         | 459750000 | -2.93021 |



|               |                                                                |               |                  |          |
|---------------|----------------------------------------------------------------|---------------|------------------|----------|
| Q08378        | Golgin subfamily A member 3                                    | GOLGA3        | 413040000        | -2.9265  |
| P84085        | ADP-ribosylation factor 5                                      | ARF5          | 7.25E+09         | -2.92396 |
| Q8IZP0        | Abl interactor 1                                               | ABI1          | 456600000        | -2.92367 |
| Q8IVF2        | Protein AHNAK2                                                 | AHNAK2        | 1.783E+10        | -2.91172 |
| Q9Y2A7        | Nck-associated protein 1                                       | NCKAP1        | 1.242E+09        | -2.9058  |
| Q9Y570        | Protein phosphatase methylesterase 1                           | PPME1         | 619340000        | -2.90362 |
| O15397        | Importin-8                                                     | IPO8          | 359510000        | -2.90222 |
| O95716        | Ras-related protein Rab-3D                                     | RAB3D         | 200160000        | -2.8986  |
| O43837        | Isocitrate dehydrogenase [NAD] subunit beta, mitochondrial     | IDH3B         | 1.75E+09         | -2.89145 |
| Q92598        | Heat shock protein 105 kDa                                     | HSPH1         | 6.705E+09        | -2.89131 |
| Q13464        | Rho-associated protein kinase 1                                | ROCK1         | 178150000        | -2.88576 |
| O00471        | Exocyst complex component 5                                    | EXOC5         | 357890000        | -2.88444 |
| O96005        | Cleft lip and palate transmembrane protein 1                   | CLPTM1        | 448310000        | -2.87405 |
| Q9UKK9        | ADP-sugar pyrophosphatase                                      | NUDT5         | 2.154E+09        | -2.87352 |
| P31947        | 14-3-3 protein sigma                                           | SFN           | 1.395E+09        | -2.8715  |
| P08648        | Integrin alpha-5;Integrin alpha-5 heavy chain;Integrin alpha-5 | ITGA5         | 1.314E+09        | -2.86756 |
| P61221        | ATP-binding cassette sub-family E member 1                     | ABCE1         | 3.726E+09        | -2.86695 |
| O60749        | Sorting nexin-2                                                | SNX2          | 1.373E+09        | -2.86605 |
| Q9NV70        | Exocyst complex component 1                                    | EXOC1         | 746440000        | -2.86184 |
| Q99497        | Protein deglycase DJ-1                                         | PARK7         | 5.959E+09        | -2.85716 |
| Q15008        | 26S proteasome non-ATPase regulatory subunit 6                 | PSMD6         | 4.478E+09        | -2.85704 |
| Q15436        | Protein transport protein Sec23A                               | SEC23A        | 3.532E+09        | -2.85345 |
| Q9BYC5        | Alpha-(1,6)-fucosyltransferase                                 | FUT8          | 696830000        | -2.84959 |
| Q15404        | Ras suppressor protein 1                                       | RSU1          | 2.096E+09        | -2.84754 |
| Q13509        | Tubulin beta-3 chain                                           | TUBB3         | 9.973E+09        | -2.84446 |
| Q96P70        | Importin-9                                                     | IPO9          | 1.291E+09        | -2.83393 |
| Q14643        | Inositol 1,4,5-trisphosphate receptor type 1                   | ITPR1         | 671700000        | -2.83172 |
| P50990        | T-complex protein 1 subunit theta                              | CCT8          | 1.683E+10        | -2.82585 |
| Q15020        | Squamous cell carcinoma antigen recognized by T-cells          | SART3         | 633770000        | -2.82246 |
| P60842        | Eukaryotic initiation factor 4A-I                              | EIF4A1        | 4.519E+10        | -2.82122 |
| Q9UQ80        | Proliferation-associated protein 2G4                           | PA2G4         | 5.475E+09        | -2.81945 |
| Q9UIA9        | Exportin-7                                                     | XPO7          | 500690000        | -2.81701 |
| Q7Z2W9        | 39S ribosomal protein L21, mitochondrial                       | MRPL21        | 618800000        | -2.81472 |
| Q13907        | Isopentenyl-diphosphate Delta-isomerase 1                      | IDI1          | 741040000        | -2.81434 |
| Q9NZL9        | Methionine adenosyltransferase 2 subunit beta                  | MAT2B         | 1.021E+09        | -2.80891 |
| P48444        | Coatomer subunit delta                                         | ARCN1         | 3.371E+09        | -2.80748 |
| P17612;P27612 | cAMP-dependent protein kinase catalytic subunit gamma          | PRKACA;PRKACB | 565780000        | -2.8036  |
| O15511        | Actin-related protein 2/3 complex subunit 5                    | ARPC5         | 1.093E+09        | -2.79912 |
| O15460        | Prolyl 4-hydroxylase subunit alpha-2                           | P4HA2         | 1.614E+09        | -2.78365 |
| P36405        | ADP-ribosylation factor-like protein 3                         | ARL3          | 1.948E+09        | -2.78197 |
| O75436        | Vacuolar protein sorting-associated protein 26A                | VPS26A        | 1.694E+09        | -2.77979 |
| Q9BTW9        | Tubulin-specific chaperone D                                   | TBCD          | 1.011E+09        | -2.77916 |
| Q9UKS6        | Protein kinase C and casein kinase substrate in neurons        | PACSIN3       | 128130000        | -2.77798 |
| Q16181        | Septin-7                                                       |               | Sep-07 3.075E+09 | -2.77591 |
| Q14974        | Importin subunit beta-1                                        | KPNB1         | 2.508E+10        | -2.77395 |
| Q9BZG1        | Ras-related protein Rab-34                                     | RAB34         | 266300000        | -2.76812 |
| Q9NQW7        | Xaa-Pro aminopeptidase 1                                       | XPNPEP1       | 1.498E+09        | -2.765   |
| Q92575        | UBX domain-containing protein 4                                | UBXN4         | 274270000        | -2.76291 |
| P56545        | C-terminal-binding protein 2                                   | CTBP2         | 540190000        | -2.75672 |
| Q96S44        | TP53-regulating kinase                                         | TP53RK        | 397330000        | -2.75499 |

|        |                                                                       |          |           |          |
|--------|-----------------------------------------------------------------------|----------|-----------|----------|
| P12931 | Proto-oncogene tyrosine-protein kinase Src                            | SRC      | 189270000 | -2.75012 |
| Q9P0L0 | Vesicle-associated membrane protein-associated protein 4              | VAPA     | 2.359E+09 | -2.74909 |
| Q6ZSR9 | Uncharacterized protein FLJ45252                                      |          | 165230000 | -2.74468 |
| Q3V6T2 | Girdin                                                                | CCDC88A  | 68424000  | -2.74262 |
| Q9Y678 | Coatamer subunit gamma-1                                              | COPG1    | 4.188E+09 | -2.74114 |
| P59998 | Actin-related protein 2/3 complex subunit 4                           | ARPC4    | 2.825E+09 | -2.73419 |
| P26583 | High mobility group protein B2                                        | HMGB2    | 1.512E+09 | -2.73243 |
| P62877 | E3 ubiquitin-protein ligase RBX1;E3 ubiquitin-protein ligase RBX1     | RBX1     | 324230000 | -2.72691 |
| P63104 | 14-3-3 protein zeta/delta                                             | YWHAZ    | 2.642E+10 | -2.72465 |
| Q9UKY7 | Protein CDV3 homolog                                                  | CDV3     | 1.939E+09 | -2.72345 |
| P48643 | T-complex protein 1 subunit epsilon                                   | CCT5     | 2.94E+10  | -2.72206 |
| Q9Y6E0 | Serine/threonine-protein kinase 24;Serine/threonine-protein kinase 24 | STK24    | 348100000 | -2.72126 |
| Q9Y266 | Nuclear migration protein nudC                                        | NUDC     | 3.886E+09 | -2.71223 |
| P26640 | Valine--tRNA ligase                                                   | VAR5     | 4.847E+09 | -2.71112 |
| P13674 | Prolyl 4-hydroxylase subunit alpha-1                                  | P4HA1    | 984730000 | -2.70873 |
| Q9NS69 | Mitochondrial import receptor subunit TOM22 homolog                   | TOMM22   | 919630000 | -2.70569 |
| P17980 | 26S protease regulatory subunit 6A                                    | PSMC3    | 8.852E+09 | -2.69982 |
| O60488 | Long-chain-fatty-acid--CoA ligase 4                                   | ACSL4    | 2.113E+09 | -2.69435 |
| P28074 | Proteasome subunit beta type-5                                        | PSMB5    | 3.029E+09 | -2.68887 |
| P17987 | T-complex protein 1 subunit alpha                                     | TCP1     | 1.97E+10  | -2.66472 |
| P51570 | Galactokinase                                                         | GALK1    | 1.018E+09 | -2.66051 |
| P04406 | Glyceraldehyde-3-phosphate dehydrogenase                              | GAPDH    | 2.828E+11 | -2.65682 |
| P15311 | Ezrin                                                                 | EZR      | 2.636E+09 | -2.65522 |
| P61289 | Proteasome activator complex subunit 3                                | PSME3    | 3.762E+09 | -2.65374 |
| Q9Y547 | Intraflagellar transport protein 25 homolog                           | HSPB11   | 330070000 | -2.65253 |
| Q15738 | Sterol-4-alpha-carboxylate 3-dehydrogenase, decanoate                 | NSDHL    | 2.071E+09 | -2.64808 |
| Q9BTE6 | Alanyl-tRNA editing protein Aarsd1                                    | AARSD1   | 229040000 | -2.64655 |
| Q9UPN7 | Serine/threonine-protein phosphatase 6 regulator 1                    | PPP6R1   | 303470000 | -2.644   |
| P12268 | Inosine-5-monophosphate dehydrogenase 2                               | IMPDH2   | 9.798E+09 | -2.64127 |
| Q13557 | Calcium/calmodulin-dependent protein kinase type 2 delta              | CAMK2D   | 1.917E+09 | -2.63935 |
| P50991 | T-complex protein 1 subunit delta                                     | CCT4     | 2.055E+10 | -2.63775 |
| Q99733 | Nucleosome assembly protein 1-like 4                                  | NAP1L4   | 2.747E+09 | -2.63668 |
| Q9BXS5 | AP-1 complex subunit mu-1                                             | AP1M1    | 1.339E+09 | -2.63386 |
| Q9Y3E0 | Vesicle transport protein GOT1B                                       | GOLT1B   | 388560000 | -2.63278 |
| P14324 | Farnesyl pyrophosphate synthase                                       | FDPS     | 792170000 | -2.62787 |
| P51153 | Ras-related protein Rab-13                                            | RAB13    | 938640000 | -2.62706 |
| P43304 | Glycerol-3-phosphate dehydrogenase, mitochondrial                     | GPD2     | 2.753E+09 | -2.62584 |
| Q96JB5 | CDK5 regulatory subunit-associated protein 3                          | CDK5RAP3 | 407180000 | -2.625   |
| P15309 | Prostatic acid phosphatase;PAPf39                                     | ACPP     | 78529000  | -2.618   |
| Q14566 | DNA replication licensing factor MCM6                                 | MCM6     | 5.937E+09 | -2.61573 |
| Q13535 | Serine/threonine-protein kinase ATR                                   | ATR      | 93981000  | -2.60783 |
| P42224 | Signal transducer and activator of transcription 1-alpha              | STAT1    | 2.005E+09 | -2.60613 |
| P53582 | Methionine aminopeptidase 1                                           | METAP1   | 168640000 | -2.604   |
| Q16543 | Hsp90 co-chaperone Cdc37;Hsp90 co-chaperone C                         | CDC37    | 5.135E+09 | -2.60307 |
| Q9Y5K5 | Ubiquitin carboxyl-terminal hydrolase isozyme L5                      | UCHL5    | 1.255E+09 | -2.60211 |
| Q6UW68 | Transmembrane protein 205                                             | TMEM205  | 400720000 | -2.59905 |
| P12955 | Xaa-Pro dipeptidase                                                   | PEPD     | 902380000 | -2.58646 |
| P09104 | Gamma-enolase                                                         | ENO2     | 4.918E+09 | -2.58336 |
| P20340 | Ras-related protein Rab-6A                                            | RAB6A    | 2.454E+09 | -2.57727 |
| P62495 | Eukaryotic peptide chain release factor subunit 1                     | ETF1     | 2.821E+09 | -2.57397 |

|         |                                                     |           |           |          |
|---------|-----------------------------------------------------|-----------|-----------|----------|
| O14530  | Thioredoxin domain-containing protein 9             | TXNDC9    | 209090000 | -2.56812 |
| P55084  | Trifunctional enzyme subunit beta, mitochondrial;   | HADHB     | 4.022E+09 | -2.56537 |
| Q9Y450  | HBS1-like protein                                   | HBS1L     | 764520000 | -2.55913 |
| Q9UJZ1  | Stomatin-like protein 2, mitochondrial              | STOML2    | 2.951E+09 | -2.55605 |
| P00403  | Cytochrome c oxidase subunit 2                      | MT-CO2    | 4.155E+09 | -2.54838 |
| Q9C0C9  | E2/E3 hybrid ubiquitin-protein ligase UBE2O         | UBE2O     | 1.126E+09 | -2.54389 |
| P17655  | Calpain-2 catalytic subunit                         | CAPN2     | 1.174E+10 | -2.53928 |
| P49327  | Fatty acid synthase;[Acyl-carrier-protein] S-acetyl | FASN      | 3.037E+10 | -2.53761 |
| Q9Y3A5  | Ribosome maturation protein SBDS                    | SBDS      | 534290000 | -2.53677 |
| P08240  | Signal recognition particle receptor subunit alpha  | SRPR      | 678140000 | -2.53386 |
| P08237  | ATP-dependent 6-phosphofructokinase, muscle ty      | PFKM      | 2.205E+09 | -2.526   |
| Q9Y2Q3  | Glutathione S-transferase kappa 1                   | GSTK1     | 991040000 | -2.5238  |
| Q92947  | Glutaryl-CoA dehydrogenase, mitochondrial           | GCDH      | 330040000 | -2.52006 |
| O43708  | Maleylacetoacetate isomerase                        | GSTZ1     | 560620000 | -2.51799 |
| Q06210  | Glutamine--fructose-6-phosphate aminotransferas     | GFPT1     | 2.354E+09 | -2.51786 |
| P78371  | T-complex protein 1 subunit beta                    | CCT2      | 3.661E+10 | -2.51244 |
| P32322  | Pyrroline-5-carboxylate reductase 1, mitochondria   | PYCR1     | 492320000 | -2.51003 |
| Q15125  | 3-beta-hydroxysteroid-Delta(8),Delta(7)-isomerase   | EBP       | 994480000 | -2.50684 |
| P36404  | ADP-ribosylation factor-like protein 2              | ARL2      | 587170000 | -2.50581 |
| Q9HC38  | Glyoxalase domain-containing protein 4              | GLOD4     | 2.575E+09 | -2.50262 |
| Q58FF8  | Putative heat shock protein HSP 90-beta 2           | HSP90AB2P | 3.706E+09 | -2.50096 |
| P62330  | ADP-ribosylation factor 6                           | ARF6      | 894040000 | -2.49757 |
| Q6YN16  | Hydroxysteroid dehydrogenase-like protein 2         | HSDL2     | 1.307E+09 | -2.49411 |
| O60256  | Phosphoribosyl pyrophosphate synthase-associate     | PRPSAP2   | 739940000 | -2.48324 |
| Q9UHD8  | Septin-9                                            | Sep-09    | 2.763E+09 | -2.47905 |
| P62258  | 14-3-3 protein epsilon                              | YWHAE     | 3.56E+10  | -2.47762 |
| P24752  | Acetyl-CoA acetyltransferase, mitochondrial         | ACAT1     | 4.656E+09 | -2.4766  |
| Q92922  | SWI/SNF complex subunit SMARCC1                     | SMARCC1   | 295370000 | -2.47472 |
| O95163  | Elongator complex protein 1                         | IKBKAP    | 960260000 | -2.47012 |
| P67812  | Signal peptidase complex catalytic subunit SEC11A   | SEC11A    | 834860000 | -2.46698 |
| Q16531  | DNA damage-binding protein 1                        | DDB1      | 5.704E+09 | -2.46461 |
| P46060  | Ran GTPase-activating protein 1                     | RANGAP1   | 6.803E+09 | -2.46414 |
| P26038  | Moesin                                              | MSN       | 1.745E+10 | -2.45913 |
| Q9HAV4  | Exportin-5                                          | XPO5      | 1.623E+09 | -2.45865 |
| Q06323  | Proteasome activator complex subunit 1              | PSME1     | 2.531E+09 | -2.45597 |
| P53618  | Coatomer subunit beta                               | COPB1     | 7.497E+09 | -2.44801 |
| P53634  | Dipeptidyl peptidase 1;Dipeptidyl peptidase 1 exclu | CTSC      | 31981000  | -2.44309 |
| Q9NVJ2  | ADP-ribosylation factor-like protein 8B             | ARL8B     | 1.109E+09 | -2.44192 |
| Q16878  | Cysteine dioxygenase type 1                         | CDO1      | 118520000 | -2.42662 |
| Q96RQ1  | Endoplasmic reticulum-Golgi intermediate compar     | ERGIC2    | 239990000 | -2.42652 |
| Q9NTZ6  | RNA-binding protein 12                              | RBM12     | 917440000 | -2.4246  |
| Q9UL63  | Muskelin                                            | MKLN1     | 370160000 | -2.42248 |
| P21796  | Voltage-dependent anion-selective channel proteii   | VDAC1     | 7.212E+09 | -2.42117 |
| Q8NFAQ8 | Torsin-1A-interacting protein 2                     | TOR1AIP2  | 262390000 | -2.41949 |
| P04843  | Dolichyl-diphosphooligosaccharide--protein glycos   | RPN1      | 1.022E+10 | -2.41613 |
| O75874  | Isocitrate dehydrogenase [NADP] cytoplasmic         | IDH1      | 2.827E+09 | -2.40978 |
| Q15643  | Thyroid receptor-interacting protein 11             | TRIP11    | 316530000 | -2.40917 |
| P06454  | Prothymosin alpha;Prothymosin alpha, N-terminal     | PTMA      | 673670000 | -2.39319 |
| P02786  | Transferrin receptor protein 1;Transferrin receptor | TFRC      | 9.354E+09 | -2.39236 |
| P23284  | Peptidyl-prolyl cis-trans isomerase B               | PPIB      | 7.013E+09 | -2.38466 |

|            |                                                      |                    |           |          |
|------------|------------------------------------------------------|--------------------|-----------|----------|
| P30153     | Serine/threonine-protein phosphatase 2A 65 kDa r     | PPP2R1A            | 8.295E+09 | -2.38437 |
| P27816     | Microtubule-associated protein 4                     | MAP4               | 5.575E+09 | -2.38318 |
| Q96EE3     | Nucleoporin SEH1                                     | SEH1L              | 234430000 | -2.3831  |
| O76094     | Signal recognition particle subunit SRP72            | SRP72              | 2.266E+09 | -2.38071 |
| P30040     | Endoplasmic reticulum resident protein 29            | ERP29              | 2.232E+09 | -2.37981 |
| Q9NYL2     | Mitogen-activated protein kinase kinase kinase ML    | ZAK                | 576330000 | -2.37978 |
| P18085     | ADP-ribosylation factor 4                            | ARF4               | 3.103E+09 | -2.37966 |
| P49589     | Cysteine--tRNA ligase, cytoplasmic                   | CARS               | 598850000 | -2.37858 |
| Q7L1Q6     | Basic leucine zipper and W2 domain-containing pr     | BZW1               | 3.586E+09 | -2.37603 |
| Q9UNH7     | Sorting nexin-6;Sorting nexin-6, N-terminally proce  | SNX6               | 627370000 | -2.3716  |
| O43175     | D-3-phosphoglycerate dehydrogenase                   | PHGDH              | 1.101E+10 | -2.36781 |
| P63241;Q6  | Eukaryotic translation initiation factor 5A-1;Eukary | EIF5A;EIF5AL1;EIF5 | 1.593E+10 | -2.36698 |
| O00151     | PDZ and LIM domain protein 1                         | PDLIM1             | 1.997E+09 | -2.36569 |
| Q9ULT8     | E3 ubiquitin-protein ligase HECTD1                   | HECTD1             | 549720000 | -2.36451 |
| P48556     | 26S proteasome non-ATPase regulatory subunit 8       | PSMD8              | 1.882E+09 | -2.36238 |
| O76031     | ATP-dependent Clp protease ATP-binding subunit (     | CLPX               | 379990000 | -2.36076 |
| Q9P0J0     | NADH dehydrogenase [ubiquinone] 1 alpha subcor       | NDUFA13            | 745000000 | -2.35451 |
| Q92888     | Rho guanine nucleotide exchange factor 1             | ARHGEF1            | 570410000 | -2.35325 |
| P04179     | Superoxide dismutase [Mn], mitochondrial             | SOD2               | 2.546E+09 | -2.35124 |
| Q13596     | Sorting nexin-1                                      | SNX1               | 632300000 | -2.34275 |
| O75962     | Triple functional domain protein                     | TRIO               | 633220000 | -2.34112 |
| P14406     | Cytochrome c oxidase subunit 7A2, mitochondrial      | COX7A2             | 619690000 | -2.3314  |
| O94903     | Proline synthase co-transcribed bacterial homolog    | PROSC              | 662610000 | -2.3242  |
| P00367;P45 | Glutamate dehydrogenase 1, mitochondrial;Glutar      | GLUD1;GLUD2        | 3.664E+09 | -2.31884 |
| O43242     | 26S proteasome non-ATPase regulatory subunit 3       | PSMD3              | 6.594E+09 | -2.3185  |
| Q7L311     | Armadillo repeat-containing X-linked protein 2       | ARMCX2             | 126350000 | -2.31383 |
| Q9UH99     | SUN domain-containing protein 2                      | SUN2               | 435990000 | -2.31345 |
| P00533     | Epidermal growth factor receptor                     | EGFR               | 613290000 | -2.31294 |
| P09525     | Annexin A4                                           | ANXA4              | 2.248E+09 | -2.31228 |
| P11586     | C-1-tetrahydrofolate synthase, cytoplasmic;Methy     | MTHFD1             | 2.048E+10 | -2.31124 |
| Q15819     | Ubiquitin-conjugating enzyme E2 variant 2            | UBE2V2             | 1.996E+09 | -2.30942 |
| Q9BTE3     | Mini-chromosome maintenance complex-binding p        | MCMBP              | 448110000 | -2.30839 |
| Q13200     | 26S proteasome non-ATPase regulatory subunit 2       | PSMD2              | 1.359E+10 | -2.30782 |
| Q9BVG4     | Protein PBDC1                                        | PBDC1              | 370110000 | -2.30721 |
| Q96JJ3     | Engulfment and cell motility protein 2               | ELMO2              | 301460000 | -2.30598 |
| Q92538     | Golgi-specific brefeldin A-resistance guanine nucle  | GBF1               | 1.087E+09 | -2.29233 |
| Q9GZQ8;A6  | Microtubule-associated proteins 1A/1B light chain    | MAP1LC3B;MAP1L     | 512260000 | -2.28479 |
| P40939     | Trifunctional enzyme subunit alpha, mitochondrial    | HADHA              | 8.541E+09 | -2.2837  |
| Q99460     | 26S proteasome non-ATPase regulatory subunit 1       | PSMD1              | 7.21E+09  | -2.28318 |
| Q9UBT7     | Alpha-catulin                                        | CTNNAL1            | 133700000 | -2.2827  |
| P55786     | Puromycin-sensitive aminopeptidase                   | NPEPPS             | 7.054E+09 | -2.27441 |
| Q00610     | Clathrin heavy chain 1                               | CLTC               | 7.501E+10 | -2.26991 |
| P14927     | Cytochrome b-c1 complex subunit 7                    | UQCRB              | 386690000 | -2.26746 |
| Q08AF3     | Schlafen family member 5                             | SLFN5              | 415960000 | -2.26438 |
| P35244     | Replication protein A 14 kDa subunit                 | RPA3               | 389430000 | -2.25988 |
| Q9ULA0     | Aspartyl aminopeptidase                              | DNPEP              | 1.107E+09 | -2.25734 |
| P05120     | Plasminogen activator inhibitor 2                    | SERPINB2           | 982320000 | -2.24831 |
| Q9UL46     | Proteasome activator complex subunit 2               | PSME2              | 5.77E+09  | -2.24562 |
| Q9Y4R8     | Telomere length regulation protein TEL2 homolog      | TELO2              | 90010000  | -2.24493 |
| O95292     | Vesicle-associated membrane protein-associated p     | VAPB               | 1.12E+09  | -2.2403  |

|           |                                                                            |             |           |          |
|-----------|----------------------------------------------------------------------------|-------------|-----------|----------|
| P40227    | T-complex protein 1 subunit zeta                                           | CCT6A       | 1.809E+10 | -2.24019 |
| P32455    | Interferon-induced guanylate-binding protein 1                             | GBP1        | 296530000 | -2.2313  |
| P50213    | Isocitrate dehydrogenase [NAD] subunit alpha, mitochondrial                | IDH3A       | 2.907E+09 | -2.22585 |
| P05204;Q1 | Non-histone chromosomal protein HMG-17;High mobility group protein 2;HMGN3 | HMGN2;HMGN3 | 357670000 | -2.22007 |
| Q99436    | Proteasome subunit beta type-7                                             | PSMB7       | 1.153E+09 | -2.21523 |
| P60981    | Dextrin                                                                    | DSTN        | 893400000 | -2.2089  |
| P00390    | Glutathione reductase, mitochondrial                                       | GSR         | 781040000 | -2.20794 |
| P78559    | Microtubule-associated protein 1A;MAP1A heavy chain                        | MAP1A       | 4.141E+09 | -2.20311 |
| O43592    | Exportin-T                                                                 | XPOT        | 1.586E+09 | -2.20043 |
| Q9NWW8    | BRISC and BRCA1-A complex member 1                                         | BABAM1      | 176990000 | -2.19776 |
| Q9Y6D6    | Brefeldin A-inhibited guanine nucleotide-exchange factor 1                 | ARFGEF1     | 96572000  | -2.19518 |
| O14662    | Syntaxin-16                                                                | STX16       | 214470000 | -2.19336 |
| P49821    | NADH dehydrogenase [ubiquinone] flavoprotein 1, mitochondrial              | NDUFV1      | 1.04E+09  | -2.19029 |
| P55010    | Eukaryotic translation initiation factor 5                                 | EIF5        | 3.912E+09 | -2.18982 |
| P63000;P6 | Ras-related C3 botulinum toxin substrate 1;Ras-related RAC1;RAC3           | RAC1;RAC3   | 1.6E+09   | -2.18579 |
| P49257    | Protein ERGIC-53                                                           | LMAN1       | 1.195E+09 | -2.18368 |
| Q9NZ32    | Actin-related protein 10                                                   | ACTR10      | 495030000 | -2.18167 |
| Q13011    | Delta(3,5)-Delta(2,4)-dienoyl-CoA isomerase, mitochondrial                 | ECH1        | 1.417E+09 | -2.17846 |
| Q68E01    | Integrator complex subunit 3                                               | INTS3       | 311470000 | -2.17816 |
| P29373    | Cellular retinoic acid-binding protein 2                                   | CRABP2      | 295050000 | -2.17777 |
| Q06124    | Tyrosine-protein phosphatase non-receptor type 1                           | PTPN11      | 836950000 | -2.16652 |
| P28331    | NADH-ubiquinone oxidoreductase 75 kDa subunit, mitochondrial               | NDUFS1      | 2.448E+09 | -2.15827 |
| Q13555    | Calcium/calmodulin-dependent protein kinase type 2 gamma                   | CAMK2G      | 166000000 | -2.15283 |
| Q2TAA2    | Isoamyl acetate-hydrolyzing esterase 1 homolog                             | IAH1        | 607880000 | -2.15009 |
| Q9Y3Z3    | Deoxynucleoside triphosphate triphosphohydrolase 1                         | SAMHD1      | 589020000 | -2.14924 |
| P49736    | DNA replication licensing factor MCM2                                      | MCM2        | 6.489E+09 | -2.14322 |
| Q5VTR2    | E3 ubiquitin-protein ligase BRE1A                                          | RNF20       | 612800000 | -2.13499 |
| P61981    | 14-3-3 protein gamma;14-3-3 protein gamma, N-terminal                      | YWHAQ       | 5.555E+09 | -2.12024 |
| P21964    | Catechol O-methyltransferase                                               | COMT        | 1.136E+09 | -2.11798 |
| P22612    | cAMP-dependent protein kinase catalytic subunit gamma                      | PRKACG      | 323640000 | -2.11534 |
| O75694    | Nuclear pore complex protein Nup155                                        | NUP155      | 1.189E+09 | -2.11239 |
| P55060    | Exportin-2                                                                 | CSE1L       | 1.732E+10 | -2.11038 |
| P04062    | Glucosylceramidase                                                         | GBA         | 1.104E+09 | -2.1101  |
| O14880    | Microsomal glutathione S-transferase 3                                     | MGST3       | 836680000 | -2.10943 |
| P07711    | Cathepsin L1;Cathepsin L1 heavy chain;Cathepsin L                          | CTSL        | 703190000 | -2.10908 |
| Q9BV44    | THUMP domain-containing protein 3                                          | THUMPD3     | 353860000 | -2.10743 |
| Q9H4M9    | EH domain-containing protein 1                                             | EHD1        | 8.361E+09 | -2.10172 |
| P55735    | Protein SEC13 homolog                                                      | SEC13       | 2.086E+09 | -2.09399 |
| Q13148    | TAR DNA-binding protein 43                                                 | TARDBP      | 2.45E+09  | -2.09378 |
| P11802    | Cyclin-dependent kinase 4                                                  | CDK4        | 289160000 | -2.09366 |
| Q8WX92    | Negative elongation factor B                                               | NELFB       | 378020000 | -2.09233 |
| Q8IX04    | Ubiquitin-conjugating enzyme E2 variant 3                                  | UEVLD       | 383990000 | -2.09069 |
| Q9UNM6    | 26S proteasome non-ATPase regulatory subunit 13                            | PSMD13      | 5.02E+09  | -2.08955 |
| Q14318    | Peptidyl-prolyl cis-trans isomerase FKBP8                                  | FKBP8       | 504510000 | -2.08927 |
| P80723    | Brain acid soluble protein 1                                               | BASP1       | 759190000 | -2.08137 |
| P24539    | ATP synthase F(0) complex subunit B1, mitochondrial                        | ATP5F1      | 2.312E+09 | -2.08121 |
| P35606    | Coatomer subunit beta                                                      | COPB2       | 3.417E+09 | -2.07625 |
| Q9NXG2    | THUMP domain-containing protein 1                                          | THUMPD1     | 466900000 | -2.07021 |
| O43776    | Asparagine--tRNA ligase, cytoplasmic                                       | NARS        | 1.925E+09 | -2.06993 |
| P46940    | Ras GTPase-activating-like protein IQGAP1                                  | IQGAP1      | 2.149E+10 | -2.06792 |

|              |                                                                                     |                 |           |          |
|--------------|-------------------------------------------------------------------------------------|-----------------|-----------|----------|
| Q15363       | Transmembrane emp24 domain-containing protein TMED2                                 |                 | 2.621E+09 | -2.06314 |
| P33176       | Kinesin-1 heavy chain                                                               | KIF5B           | 7.131E+09 | -2.06012 |
| P56537       | Eukaryotic translation initiation factor 6                                          | EIF6            | 1.649E+09 | -2.05006 |
| O15427       | Monocarboxylate transporter 4                                                       | SLC16A3         | 130030000 | -2.04618 |
| Q9Y5L0       | Transportin-3                                                                       | TNPO3           | 2.073E+09 | -2.04571 |
| O60568       | Procollagen-lysine,2-oxoglutarate 5-dioxygenase 3                                   | PLOD3           | 342480000 | -2.0417  |
| Q9NYY8       | FAST kinase domain-containing protein 2                                             | FASTKD2         | 258590000 | -2.02783 |
| P13995       | Bifunctional methylenetetrahydrofolate dehydrogenase                                | MTHFD2          | 519920000 | -2.02469 |
| P27695       | DNA-(apurinic or apyrimidinic site) lyase;DNA-(apurinic or apyrimidinic site) lyase | APEX1           | 3.206E+09 | -2.02428 |
| P21291       | Cysteine and glycine-rich protein 1                                                 | CSRP1           | 1.071E+09 | -2.02161 |
| P22059       | Oxysterol-binding protein 1                                                         | OSBP            | 389920000 | -2.01984 |
| P23528       | Cofilin-1                                                                           | CFL1            | 6.881E+10 | -2.01968 |
| P04439       | HLA class I histocompatibility antigen, A-3 alpha chain                             | HLA-A           | 1.234E+09 | -2.0159  |
| P31949       | Protein S100-A11;Protein S100-A11, N-terminally truncated                           | S100A11         | 778390000 | -2.00585 |
| Q9NQX3       | Gephyrin;Molybdopterin adenylyltransferase;Molybdopterin adenylyltransferase        | GPHN            | 225790000 | -2.00306 |
| Q9Y6E2       | Basic leucine zipper and W2 domain-containing protein 2                             | BZW2            | 900260000 | -1.99954 |
| O75964       | ATP synthase subunit g, mitochondrial                                               | ATP5L           | 1.018E+09 | -1.99925 |
| P45880       | Voltage-dependent anion-selective channel protein 2                                 | VDAC2           | 3.459E+09 | -1.99137 |
| Q8WUM0       | Nuclear pore complex protein Nup133                                                 | NUP133          | 301040000 | -1.99032 |
| Q53EP0       | Fibronectin type III domain-containing protein 3B                                   | FNDC3B          | 74397000  | -1.9881  |
| Q969Z0       | Protein TBRG4                                                                       | TBRG4           | 358160000 | -1.98444 |
| Q16880       | 2-hydroxyacylsphingosine 1-beta-galactosyltransferase                               | UGT8            | 346440000 | -1.98348 |
| O75369       | Filamin-B                                                                           | FLNB            | 8.305E+09 | -1.98164 |
| Q9HAV7       | GrpE protein homolog 1, mitochondrial                                               | GRPEL1          | 671310000 | -1.97418 |
| P42704       | Leucine-rich PPR motif-containing protein, mitochondrial                            | LRPPRC          | 2.009E+10 | -1.96888 |
| P26641       | Elongation factor 1-gamma                                                           | EEF1G           | 3.381E+10 | -1.96857 |
| P06576       | ATP synthase subunit beta, mitochondrial                                            | ATP5B           | 5.514E+10 | -1.96536 |
| P31153       | S-adenosylmethionine synthase isoform type-2                                        | MAT2A           | 1.792E+09 | -1.9637  |
| Q96P16       | Regulation of nuclear pre-mRNA domain-containing protein 1                          | RPRD1A          | 844270000 | -1.95158 |
| P43246       | DNA mismatch repair protein Msh2                                                    | MSH2            | 1.992E+09 | -1.95154 |
| Q9Y4Z0       | U6 snRNA-associated Sm-like protein LSM4                                            | LSM4            | 1.263E+09 | -1.95146 |
| O60841       | Eukaryotic translation initiation factor 5B                                         | EIF5B           | 2.965E+09 | -1.94983 |
| P13010       | X-ray repair cross-complementing protein 5                                          | XRCC5           | 1.928E+10 | -1.9496  |
| P68104;Q5396 | Elongation factor 1-alpha 1;Putative elongation factor 1-alpha 1                    | EEF1A1;EEF1A1P5 | 1.274E+11 | -1.94932 |
| O75396       | Vesicle-trafficking protein SEC22b                                                  | SEC22B          | 2.616E+09 | -1.94645 |
| Q29RF7       | Sister chromatid cohesion protein PDS5 homolog A                                    | PDS5A           | 729270000 | -1.94006 |
| P53621       | Coatomer subunit alpha;Xenin;Proxenin                                               | COPA            | 9.566E+09 | -1.93794 |
| Q00341       | Vigilin                                                                             | HDLBP           | 6.246E+09 | -1.93553 |
| P13489       | Ribonuclease inhibitor                                                              | RNH1            | 804630000 | -1.935   |
| O43396       | Thioredoxin-like protein 1                                                          | TXNL1           | 563030000 | -1.92979 |
| Q9BPX3       | Condensin complex subunit 3                                                         | NCAPG           | 1.487E+09 | -1.9281  |
| Q96CN7       | Isochorismatase domain-containing protein 1                                         | ISOC1           | 403880000 | -1.92408 |
| Q96DH6       | RNA-binding protein Musashi homolog 2                                               | MSI2            | 463510000 | -1.92363 |
| Q15043       | Zinc transporter ZIP14                                                              | SLC39A14        | 354730000 | -1.9219  |
| P35232       | Prohibitin                                                                          | PHB             | 1.123E+10 | -1.92026 |
| P78406       | mRNA export factor                                                                  | RAE1            | 550240000 | -1.91548 |
| Q13442       | 28 kDa heat- and acid-stable phosphoprotein                                         | PDAP1           | 1.327E+09 | -1.91518 |
| Q9H845       | Acyl-CoA dehydrogenase family member 9, mitochondrial                               | ACAD9           | 1.915E+09 | -1.91423 |
| P53597       | Succinyl-CoA ligase [ADP/GDP-forming] subunit alpha                                 | SUCLG1          | 854560000 | -1.90581 |
| P21980       | Protein-glutamine gamma-glutamyltransferase 2                                       | TGM2            | 1.162E+09 | -1.90541 |

|        |                                                      |          |           |          |
|--------|------------------------------------------------------|----------|-----------|----------|
| P07858 | Cathepsin B;Cathepsin B light chain;Cathepsin B he   | CTSB     | 2.124E+09 | -1.90064 |
| P25787 | Proteasome subunit alpha type-2                      | PSMA2    | 6.36E+09  | -1.89746 |
| O00267 | Transcription elongation factor SPT5                 | SUPT5H   | 360960000 | -1.89546 |
| P63010 | AP-2 complex subunit beta                            | AP2B1    | 7.397E+09 | -1.89245 |
| P49368 | T-complex protein 1 subunit gamma                    | CCT3     | 2.618E+10 | -1.89195 |
| Q9Y4K1 | Absent in melanoma 1 protein                         | AIM1     | 1.033E+09 | -1.89152 |
| P43034 | Platelet-activating factor acetylhydrolase IB subuni | PAFAH1B1 | 968990000 | -1.88813 |
| O60313 | Dynamin-like 120 kDa protein, mitochondrial;Dyna     | OPA1     | 1.399E+09 | -1.88592 |
| Q9UI12 | V-type proton ATPase subunit H                       | ATP6V1H  | 1.364E+09 | -1.88075 |
| P49411 | Elongation factor Tu, mitochondrial                  | TUFM     | 1.116E+10 | -1.87802 |
| Q92797 | Symplekin                                            | SYMPK    | 529540000 | -1.87278 |
| P41227 | N-alpha-acetyltransferase 10                         | NAA10    | 901260000 | -1.86924 |
| Q13951 | Core-binding factor subunit beta                     | CBFB     | 198250000 | -1.8682  |
| P51858 | Hepatoma-derived growth factor                       | HDGF     | 4.186E+09 | -1.86256 |
| P11047 | Laminin subunit gamma-1                              | LAMC1    | 305470000 | -1.86173 |
| Q9NRF9 | DNA polymerase epsilon subunit 3                     | POLE3    | 739170000 | -1.84537 |
| P35080 | Profilin-2                                           | PFN2     | 1.292E+09 | -1.84057 |
| Q9Y6G9 | Cytoplasmic dynein 1 light intermediate chain 1      | DYNC1LI1 | 912260000 | -1.83921 |
| P17858 | ATP-dependent 6-phosphofructokinase, liver type      | PFKL     | 1.244E+09 | -1.83823 |
| P49721 | Proteasome subunit beta type-2                       | PSMB2    | 2.154E+09 | -1.8364  |
| P11172 | Uridine 5-monophosphate synthase;Orotate phos        | UMPS     | 1.375E+09 | -1.83074 |
| P61966 | AP-1 complex subunit sigma-1A                        | AP1S1    | 132690000 | -1.83072 |
| O75534 | Cold shock domain-containing protein E1              | CSDE1    | 2.559E+09 | -1.82656 |
| Q99567 | Nuclear pore complex protein Nup88                   | NUP88    | 153100000 | -1.82334 |
| Q8N183 | Mimitin, mitochondrial                               | NDUFAF2  | 502500000 | -1.81954 |
| Q9NP72 | Ras-related protein Rab-18                           | RAB18    | 945160000 | -1.8186  |
| O14744 | Protein arginine N-methyltransferase 5;Protein arg   | PRMT5    | 2.154E+09 | -1.81551 |
| Q9NVA2 | Septin-11                                            |          | 1.934E+09 | -1.80876 |
| Q9P003 | Protein cornichon homolog 4                          | CNIH4    | 371040000 | -1.80857 |
| P52630 | Signal transducer and activator of transcription 2   | STAT2    | 221270000 | -1.80396 |
| O75822 | Eukaryotic translation initiation factor 3 subunit J | EIF3J    | 2.127E+09 | -1.80349 |
| P29966 | Myristoylated alanine-rich C-kinase substrate        | MARCKS   | 1.064E+09 | -1.80312 |
| Q15637 | Splicing factor 1                                    | SF1      | 2.589E+09 | -1.80306 |
| Q9H4A4 | Aminopeptidase B                                     | RNPEP    | 946840000 | -1.80286 |
| Q9UHB9 | Signal recognition particle subunit SRP68            | SRP68    | 4.058E+09 | -1.79927 |
| P22033 | Methylmalonyl-CoA mutase, mitochondrial              | MUT      | 578980000 | -1.79833 |
| P01130 | Low-density lipoprotein receptor                     | LDLR     | 388310000 | -1.79604 |
| Q9NQT8 | Kinesin-like protein KIF13B                          | KIF13B   | 157010000 | -1.79053 |
| P48047 | ATP synthase subunit O, mitochondrial                | ATP5O    | 4.917E+09 | -1.78897 |
| P21589 | 5-nucleotidase                                       | NT5E     | 2.672E+09 | -1.78696 |
| P28066 | Proteasome subunit alpha type-5                      | PSMA5    | 2.894E+09 | -1.78515 |
| Q02224 | Centromere-associated protein E                      | CENPE    | 5.317E+10 | -1.78244 |
| Q9UQN3 | Charged multivesicular body protein 2b               | CHMP2B   | 86022000  | -1.7767  |
| Q13418 | Integrin-linked protein kinase                       | ILK      | 2.258E+09 | -1.77591 |
| P03891 | NADH-ubiquinone oxidoreductase chain 2               | MT-ND2   | 105490000 | -1.77528 |
| Q9BPX5 | Actin-related protein 2/3 complex subunit 5-like pr  | ARPC5L   | 512640000 | -1.77249 |
| Q9Y2X7 | ARF GTPase-activating protein GIT1                   | GIT1     | 313050000 | -1.77076 |
| Q96QD8 | Sodium-coupled neutral amino acid transporter 2      | SLC38A2  | 310880000 | -1.77074 |
| P55263 | Adenosine kinase                                     | ADK      | 1.126E+09 | -1.77042 |
| Q9BXP5 | Serrate RNA effector molecule homolog                | SRRT     | 1.146E+09 | -1.76989 |

|           |                                                      |               |           |          |
|-----------|------------------------------------------------------|---------------|-----------|----------|
| Q92896    | Golgi apparatus protein 1                            | GLG1          | 149830000 | -1.76922 |
| Q9Y285    | Phenylalanine--tRNA ligase alpha subunit             | FARSA         | 3.432E+09 | -1.76342 |
| P25685    | DnaJ homolog subfamily B member 1                    | DNAJB1        | 963510000 | -1.75776 |
| Q9Y508    | E3 ubiquitin-protein ligase RNF114                   | RNF114        | 284150000 | -1.75099 |
| Q8TCE6;Q6 | Protein FAM45A;Protein FAM45B                        | FAM45A;FAM45B | 222500000 | -1.74655 |
| Q9NP74    | Palmdelphin                                          | PALMD         | 707870000 | -1.73315 |
| O75448    | Mediator of RNA polymerase II transcription subur    | MED24         | 24235000  | -1.73225 |
| O60343    | TBC1 domain family member 4                          | TBC1D4        | 192300000 | -1.72363 |
| Q9BWM7    | Sideroflexin-3                                       | SFXN3         | 1.088E+09 | -1.7136  |
| P29692    | Elongation factor 1-delta                            | EEF1D         | 1.226E+10 | -1.71083 |
| P61006    | Ras-related protein Rab-8A                           | RAB8A         | 346850000 | -1.71053 |
| Q02952    | A-kinase anchor protein 12                           | AKAP12        | 4.704E+09 | -1.70761 |
| Q9NSD9    | Phenylalanine--tRNA ligase beta subunit              | FARSB         | 3.042E+09 | -1.70637 |
| P33993    | DNA replication licensing factor MCM7                | MCM7          | 1.058E+10 | -1.7042  |
| O94925    | Glutaminase kidney isoform, mitochondrial            | GLS           | 1.286E+09 | -1.70338 |
| Q6IA69    | Glutamine-dependent NAD(+) synthetase                | NADSYN1       | 176670000 | -1.70031 |
| Q9UHQ4    | B-cell receptor-associated protein 29                | BCAP29        | 62420000  | -1.69903 |
| Q8NBJ7    | Sulfatase-modifying factor 2                         | SUMF2         | 533440000 | -1.69828 |
| O00217    | NADH dehydrogenase [ubiquinone] iron-sulfur pro      | NDUFS8        | 241430000 | -1.69649 |
| P61009    | Signal peptidase complex subunit 3                   | SPCS3         | 431310000 | -1.69498 |
| P60660    | Myosin light polypeptide 6                           | MYL6          | 3.753E+09 | -1.69238 |
| Q9Y5M8    | Signal recognition particle receptor subunit beta    | SRPRB         | 1.021E+09 | -1.69158 |
| P78344    | Eukaryotic translation initiation factor 4 gamma 2   | EIF4G2        | 5.43E+09  | -1.69111 |
| P18031    | Tyrosine-protein phosphatase non-receptor type 1     | PTPN1         | 1.517E+09 | -1.68965 |
| Q969G3    | SWI/SNF-related matrix-associated actin-depende      | SMARCE1       | 339020000 | -1.68606 |
| O00442    | RNA 3-terminal phosphate cyclase                     | RTCA          | 829450000 | -1.68506 |
| Q96JJ7    | Protein disulfide-isomerase TMX3                     | TMX3          | 205040000 | -1.68376 |
| O43684    | Mitotic checkpoint protein BUB3                      | BUB3          | 1.333E+09 | -1.68288 |
| Q9BYD1    | 39S ribosomal protein L13, mitochondrial             | MRPL13        | 468660000 | -1.67625 |
| P49593    | Protein phosphatase 1F                               | PPM1F         | 721680000 | -1.67583 |
| Q9BTV4    | Transmembrane protein 43                             | TMEM43        | 823780000 | -1.67101 |
| Q9HCN8    | Stromal cell-derived factor 2-like protein 1         | SDF2L1        | 359200000 | -1.67    |
| P36969    | Phospholipid hydroperoxide glutathione peroxid       | GPX4          | 168500000 | -1.66955 |
| Q13330    | Metastasis-associated protein MTA1                   | MTA1          | 304200000 | -1.66832 |
| Q99584    | Protein S100-A13                                     | S100A13       | 158360000 | -1.66699 |
| P61224;A6 | Ras-related protein Rap-1b;Ras-related protein Ra    | RAP1B         | 3.023E+09 | -1.66508 |
| Q9BY44    | Eukaryotic translation initiation factor 2A;Eukaryot | EIF2A         | 1.209E+09 | -1.66469 |
| P43686    | 26S protease regulatory subunit 6B                   | PSMC4         | 8.491E+09 | -1.66186 |
| Q06830    | Peroxisredoxin-1                                     | PRDX1         | 2.814E+10 | -1.65621 |
| O43447    | Peptidyl-prolyl cis-trans isomerase H                | PPIH          | 344680000 | -1.65051 |
| O95373    | Importin-7                                           | IPO7          | 9.644E+09 | -1.64651 |
| O43148    | mRNA cap guanine-N7 methyltransferase                | RNMT          | 210080000 | -1.64363 |
| O43181    | NADH dehydrogenase [ubiquinone] iron-sulfur pro      | NDUFS4        | 193380000 | -1.64056 |
| Q8NCW5    | NAD(P)H-hydrate epimerase                            | APOA1BP       | 443210000 | -1.6366  |
| P30622    | CAP-Gly domain-containing linker protein 1           | CLIP1         | 470880000 | -1.63546 |
| Q86W92    | Liprin-beta-1                                        | PPFIBP1       | 2.189E+09 | -1.62997 |
| Q9UBB6    | Neurochondrin                                        | NCDN          | 166960000 | -1.62723 |
| P10809    | 60 kDa heat shock protein, mitochondrial             | HSPD1         | 9.791E+10 | -1.62687 |
| Q14254    | Flotillin-2                                          | FLOT2         | 229050000 | -1.62454 |
| P43490    | Nicotinamide phosphoribosyltransferase               | NAMPT         | 3.982E+10 | -1.62453 |



|           |                                                                  |                 |           |          |
|-----------|------------------------------------------------------------------|-----------------|-----------|----------|
| Q9H490    | Phosphatidylinositol glycan anchor biosynthesis cl $\alpha$ PIGU |                 | 142880000 | -1.61646 |
| O95573    | Long-chain-fatty-acid--CoA ligase 3                              | ACSL3           | 832180000 | -1.61567 |
| Q9Y5S9    | RNA-binding protein 8A                                           | RBM8A           | 2.214E+09 | -1.60908 |
| Q9Y394    | Dehydrogenase/reductase SDR family member 7                      | DHRS7           | 341320000 | -1.60727 |
| Q15417    | Calponin-3                                                       | CNN3            | 768310000 | -1.60661 |
| O75947    | ATP synthase subunit d, mitochondrial                            | ATP5H           | 824030000 | -1.60507 |
| P60891    | Ribose-phosphate pyrophosphokinase 1                             | PRPS1           | 1.699E+09 | -1.6029  |
| P04899    | Guanine nucleotide-binding protein G(i) subunit al               | GNAI2           | 1.473E+09 | -1.60164 |
| P09132    | Signal recognition particle 19 kDa protein                       | SRP19           | 81537000  | -1.59729 |
| P62195    | 26S protease regulatory subunit 8                                | PSMC5           | 7.439E+09 | -1.59546 |
| Q9H7D7    | WD repeat-containing protein 26                                  | WDR26           | 472650000 | -1.59122 |
| O00505    | Importin subunit alpha-4                                         | KPNA3           | 618830000 | -1.59094 |
| Q96HC4    | PDZ and LIM domain protein 5                                     | PDLIM5          | 965670000 | -1.59075 |
| Q8TCS8    | Polyribonucleotide nucleotidyltransferase 1, mitoc               | PNPT1           | 728700000 | -1.59019 |
| Q8NFB3    | Nucleoporin Nup43                                                | NUP43           | 131640000 | -1.57837 |
| O95782    | AP-2 complex subunit alpha-1                                     | AP2A1           | 3.991E+09 | -1.57741 |
| Q8TCU6    | Phosphatidylinositol 3,4,5-trisphosphate-depende                 | PREX1           | 72325000  | -1.57418 |
| O00303    | Eukaryotic translation initiation factor 3 subunit F             | EIF3F           | 2.47E+09  | -1.57402 |
| Q9H223    | EH domain-containing protein 4                                   | EHD4            | 404350000 | -1.57132 |
| Q92620    | Pre-mRNA-splicing factor ATP-dependent RNA heli                  | DHX38           | 502660000 | -1.56494 |
| Q12888    | Tumor suppressor p53-binding protein 1                           | TP53BP1         | 692970000 | -1.55906 |
| P63151    | Serine/threonine-protein phosphatase 2A 55 kDa r                 | PPP2R2A         | 1.515E+09 | -1.55789 |
| P49354    | Protein farnesyltransferase/geranylgeranyltransfer               | FNTA            | 450250000 | -1.5569  |
| P25705    | ATP synthase subunit alpha, mitochondrial                        | ATP5A1          | 3.074E+10 | -1.55385 |
| Q9UKK3    | Poly [ADP-ribose] polymerase 4                                   | PARP4           | 294110000 | -1.54875 |
| Q8NOX7    | Spartin                                                          | SPG20           | 344060000 | -1.54343 |
| Q96FQ6    | Protein S100-A16                                                 | S100A16         | 160490000 | -1.54135 |
| Q5T4S7    | E3 ubiquitin-protein ligase UBR4                                 | UBR4            | 2.29E+09  | -1.54048 |
| Q14789    | Golgin subfamily B member 1                                      | GOLGB1          | 588940000 | -1.53843 |
| P33992    | DNA replication licensing factor MCM5                            | MCM5            | 7.97E+09  | -1.53618 |
| O00487    | 26S proteasome non-ATPase regulatory subunit 14                  | PSMD14          | 1.924E+09 | -1.53331 |
| Q02750    | Dual specificity mitogen-activated protein kinase k              | MAP2K1          | 1.345E+09 | -1.53021 |
| Q8TC07    | TBC1 domain family member 15                                     | TBC1D15         | 327520000 | -1.52846 |
| Q9Y4I1    | Unconventional myosin-Va                                         | MYO5A           | 592000000 | -1.52769 |
| P28072    | Proteasome subunit beta type-6                                   | PSMB6           | 3.1E+09   | -1.51729 |
| Q09161    | Nuclear cap-binding protein subunit 1                            | NCBP1           | 476290000 | -1.51676 |
| Q8TAT6    | Nuclear protein localization protein 4 homolog                   | NPLOC4          | 1.486E+09 | -1.51549 |
| Q9BQA1    | Methylosome protein 50                                           | WDR77           | 1.239E+09 | -1.51452 |
| P62879    | Guanine nucleotide-binding protein G(I)/G(S)/G(T)                | GNB2            | 2.134E+09 | -1.5057  |
| Q8IVD9    | NudC domain-containing protein 3                                 | NUDCD3          | 287140000 | -1.50409 |
| O95757    | Heat shock 70 kDa protein 4L                                     | HSPA4L          | 1.486E+09 | -1.50269 |
| P35611    | Alpha-adducin                                                    | ADD1            | 571720000 | -1.5016  |
| Q9BT17    | Mitochondrial ribosome-associated GTPase 1                       | MTG1            | 179930000 | -1.49688 |
| Q96N66    | Lysophospholipid acyltransferase 7                               | MBOAT7          | 432750000 | -1.49107 |
| P49757    | Protein numb homolog                                             | NUMB            | 170960000 | -1.4875  |
| O75348;O9 | V-type proton ATPase subunit G 1;V-type proton A                 | ATP6V1G1;ATP6V1 | 828740000 | -1.48401 |
| Q14764    | Major vault protein                                              | MVP             | 2.223E+10 | -1.48242 |
| Q96SU4    | Oxysterol-binding protein-related protein 9                      | OSBPL9          | 235090000 | -1.4785  |
| Q99720    | Sigma non-opioid intracellular receptor 1                        | SIGMAR1         | 636840000 | -1.47127 |
| P50613    | Cyclin-dependent kinase 7                                        | CDK7            | 91912000  | -1.47093 |

|        |                                                                      |         |           |          |
|--------|----------------------------------------------------------------------|---------|-----------|----------|
| O75326 | Semaphorin-7A                                                        | SEMA7A  | 225510000 | -1.47082 |
| Q9NW15 | Anoctamin-10                                                         | ANO10   | 167200000 | -1.46919 |
| Q99816 | Tumor susceptibility gene 101 protein                                | TSG101  | 429540000 | -1.46539 |
| Q9HD45 | Transmembrane 9 superfamily member 3                                 | TM9SF3  | 360840000 | -1.46085 |
| O94822 | E3 ubiquitin-protein ligase listerin                                 | LTN1    | 400680000 | -1.45866 |
| P06396 | Gelsolin                                                             | GSN     | 3.036E+09 | -1.45757 |
| P19387 | DNA-directed RNA polymerase II subunit RPB3                          | POLR2C  | 610600000 | -1.45634 |
| Q9UQE7 | Structural maintenance of chromosomes protein 3                      | SMC3    | 1.569E+09 | -1.45565 |
| O14981 | TATA-binding protein-associated factor 172                           | BTA1F1  | 80294000  | -1.45489 |
| Q9BZF1 | Oxysterol-binding protein-related protein 8                          | OSBPL8  | 354000000 | -1.45367 |
| P05023 | Sodium/potassium-transporting ATPase subunit alpha                   | ATP1A1  | 1.087E+10 | -1.45364 |
| A1L0T0 | Acetolactate synthase-like protein                                   | ILVBL   | 700610000 | -1.4526  |
| P13807 | Glycogen [starch] synthase, muscle                                   | GYS1    | 644430000 | -1.44969 |
| P40222 | Alpha-taxilin                                                        | TXLNA   | 1.707E+09 | -1.44479 |
| P20073 | Annexin A7                                                           | ANXA7   | 990030000 | -1.44432 |
| Q969V3 | Nicalin                                                              | NCLN    | 474270000 | -1.44056 |
| P10644 | cAMP-dependent protein kinase type I-alpha regulatory subunit        | PRKAR1A | 1.94E+09  | -1.4359  |
| P09382 | Galectin-1                                                           | LGALS1  | 3.803E+09 | -1.43471 |
| Q8WVM8 | Sec1 family domain-containing protein 1                              | SCFD1   | 2.376E+09 | -1.43452 |
| P63172 | Dynein light chain Tctex-type 1                                      | DYNLT1  | 432260000 | -1.42046 |
| P62993 | Growth factor receptor-bound protein 2                               | GRB2    | 649820000 | -1.41773 |
| Q8IZL8 | Proline-, glutamic acid- and leucine-rich protein 1                  | PELP1   | 260620000 | -1.41768 |
| Q15645 | Pachytene checkpoint protein 2 homolog                               | TRIP13  | 1.278E+09 | -1.4014  |
| Q9HB40 | Retinoid-inducible serine carboxypeptidase                           | SCPEP1  | 92351000  | -1.39921 |
| P36542 | ATP synthase subunit gamma, mitochondrial                            | ATP5C1  | 2.433E+09 | -1.39879 |
| P46108 | Adapter molecule crk                                                 | CRK     | 484610000 | -1.39557 |
| Q13895 | Bystin                                                               | BYSL    | 181850000 | -1.39139 |
| O95202 | LETM1 and EF-hand domain-containing protein 1, mitochondrial         | LETM1   | 1.381E+09 | -1.39092 |
| Q9UKM7 | Endoplasmic reticulum mannosyl-oligosaccharide 1-glucosyltransferase | MAN1B1  | 140360000 | -1.38517 |
| O00148 | ATP-dependent RNA helicase DDX39A                                    | DDX39A  | 1.535E+09 | -1.38199 |
| A6NDG6 | Phosphoglycolate phosphatase                                         | PGP     | 251790000 | -1.37809 |
| Q8NBX0 | Saccharopine dehydrogenase-like oxidoreductase                       | SCCPDH  | 537070000 | -1.37614 |
| Q9Y2S7 | Polymerase delta-interacting protein 2                               | POLDIP2 | 1.114E+09 | -1.37525 |
| O75380 | NADH dehydrogenase [ubiquinone] iron-sulfur protein 6, mitochondrial | NDUFS6  | 76361000  | -1.37523 |
| Q9NZN4 | EH domain-containing protein 2                                       | EHD2    | 278050000 | -1.37305 |
| Q14315 | Filamin-C                                                            | FLNC    | 4.838E+10 | -1.37162 |
| P35998 | 26S protease regulatory subunit 7                                    | PSMC2   | 7.249E+09 | -1.36965 |
| Q14738 | Serine/threonine-protein phosphatase 2A 56 kDa regulatory subunit B  | PPP2R5D | 462860000 | -1.36535 |
| P55072 | Transitional endoplasmic reticulum ATPase                            | VCP     | 2.639E+10 | -1.36255 |
| Q13190 | Syntaxin-5                                                           | STX5    | 394730000 | -1.36239 |
| P00846 | ATP synthase subunit alpha                                           | MT-ATP6 | 329710000 | -1.35866 |
| P49720 | Proteasome subunit beta type-3                                       | PSMB3   | 3.679E+09 | -1.35587 |
| P24666 | Low molecular weight phosphotyrosine protein phosphatase             | ACP1    | 446340000 | -1.35319 |
| Q9UBQ5 | Eukaryotic translation initiation factor 3 subunit K                 | EIF3K   | 603760000 | -1.35201 |
| Q9H3U1 | Protein unc-45 homolog A                                             | UNC45A  | 1.657E+09 | -1.35078 |
| Q969T3 | Sorting nexin-21                                                     | SNX21   | 64898000  | -1.3499  |
| P30419 | Glycylpeptide N-tetradecanoyltransferase 1                           | NMT1    | 1.623E+09 | -1.34756 |
| O94808 | Glutamine--fructose-6-phosphate aminotransferase (cytosolic)         | GFPT2   | 7.714E+09 | -1.3465  |
| P56192 | Methionine--tRNA ligase, cytoplasmic                                 | MARS    | 4.332E+09 | -1.34183 |
| P24534 | Elongation factor 1-beta                                             | EEF1B2  | 1.41E+10  | -1.33977 |

|           |                                                       |               |           |          |
|-----------|-------------------------------------------------------|---------------|-----------|----------|
| P05121    | Plasminogen activator inhibitor 1                     | SERPINE1      | 581490000 | -1.33496 |
| P51571    | Translocon-associated protein subunit delta           | SSR4          | 1.63E+09  | -1.33247 |
| Q9Y3F4    | Serine-threonine kinase receptor-associated prote     | STRAP         | 4.026E+09 | -1.32314 |
| Q6UX53    | Methyltransferase-like protein 7B                     | METTL7B       | 101710000 | -1.32256 |
| P28161    | Glutathione S-transferase Mu 2                        | GSTM2         | 749940000 | -1.3213  |
| P11166    | Solute carrier family 2, facilitated glucose transpor | SLC2A1        | 608160000 | -1.31866 |
| P39656    | Dolichyl-diphosphooligosaccharide--protein glycos     | DDOST         | 6.111E+09 | -1.31865 |
| P53999    | Activated RNA polymerase II transcriptional coacti    | SUB1          | 4.001E+09 | -1.31845 |
| P35249    | Replication factor C subunit 4                        | RFC4          | 1.094E+09 | -1.30711 |
| P11234    | Ras-related protein Ral-B                             | RALB          | 572140000 | -1.30486 |
| P12956    | X-ray repair cross-complementing protein 6            | XRCC6         | 2.501E+10 | -1.29753 |
| P21333    | Filamin-A                                             | FLNA          | 4.907E+10 | -1.29647 |
| P62333    | 26S protease regulatory subunit 10B                   | PSMC6         | 8.175E+09 | -1.29595 |
| Q8IYT4    | Katanin p60 ATPase-containing subunit A-like 2        | KATNAL2       | 818470000 | -1.29459 |
| Q9BY32    | Inosine triphosphate pyrophosphatase                  | ITPA          | 297250000 | -1.2938  |
| P11279    | Lysosome-associated membrane glycoprotein 1           | LAMP1         | 1.405E+09 | -1.29202 |
| Q14677    | Clathrin interactor 1                                 | CLINT1        | 438760000 | -1.29134 |
| Q96A33    | Coiled-coil domain-containing protein 47              | CCDC47        | 1.154E+09 | -1.29048 |
| Q9Y305    | Acyl-coenzyme A thioesterase 9, mitochondrial         | ACOT9         | 491360000 | -1.28937 |
| Q07866    | Kinesin light chain 1                                 | KLC1          | 2.275E+09 | -1.28846 |
| Q16222    | UDP-N-acetylhexosamine pyrophosphorylase;UDP          | UAP1          | 272040000 | -1.28544 |
| O60711    | Leupaxin                                              | LPXN          | 865400000 | -1.28537 |
| Q9NZJ7    | Mitochondrial carrier homolog 1                       | MTCH1         | 71462000  | -1.28405 |
| P25205    | DNA replication licensing factor MCM3                 | MCM3          | 7.633E+09 | -1.2828  |
| Q92621    | Nuclear pore complex protein Nup205                   | NUP205        | 982040000 | -1.27856 |
| Q6P2E9    | Enhancer of mRNA-decapping protein 4                  | EDC4          | 1.815E+09 | -1.27488 |
| O95817    | BAG family molecular chaperone regulator 3            | BAG3          | 235720000 | -1.27344 |
| P10515    | Dihydrolipoyllysine-residue acetyltransferase com     | DLAT          | 1.405E+09 | -1.26922 |
| P50416    | Carnitine O-palmitoyltransferase 1, liver isoform     | CPT1A         | 1.128E+09 | -1.26804 |
| Q15386    | Ubiquitin-protein ligase E3C                          | UBE3C         | 323820000 | -1.26593 |
| Q15291    | Retinoblastoma-binding protein 5                      | RBBP5         | 49942000  | -1.26542 |
| Q9UGP8    | Translocation protein SEC63 homolog                   | SEC63         | 703700000 | -1.2654  |
| P62714;P6 | Serine/threonine-protein phosphatase 2A catalytic     | PPP2CB;PPP2CA | 2.709E+09 | -1.26383 |
| P35269    | General transcription factor IIF subunit 1            | GTF2F1        | 440630000 | -1.26242 |
| P11908    | Ribose-phosphate pyrophosphokinase 2                  | PRPS2         | 553760000 | -1.26115 |
| P63244    | Guanine nucleotide-binding protein subunit beta-2     | GNB2L1        | 1.17E+10  | -1.25673 |
| Q96A26    | Protein FAM162A                                       | FAM162A       | 464820000 | -1.25377 |
| Q15392    | Delta(24)-sterol reductase                            | DHCR24        | 110280000 | -1.2506  |
| Q9UJ70    | N-acetyl-D-glucosamine kinase                         | NAGK          | 1.142E+09 | -1.25052 |
| Q9BW92    | Threonine--tRNA ligase, mitochondrial                 | TARS2         | 549220000 | -1.24968 |
| Q99543    | DnaJ homolog subfamily C member 2;DnaJ homolo         | DNAJC2        | 233340000 | -1.24543 |
| Q15021    | Condensin complex subunit 1                           | NCAPD2        | 2.171E+09 | -1.24019 |
| Q8N3D4    | EH domain-binding protein 1-like protein 1            | EHBP1L1       | 481250000 | -1.23691 |
| Q9Y4W6    | AFG3-like protein 2                                   | AFG3L2        | 1.053E+09 | -1.2359  |
| Q9ULE6    | Paladin                                               | PALD1         | 742540000 | -1.23479 |
| Q9Y3B8    | Oligoribonuclease, mitochondrial                      | REXO2         | 417390000 | -1.23476 |
| Q9UI30    | Multifunctional methyltransferase subunit TRM11       | TRMT112       | 377670000 | -1.23443 |
| Q96IX5    | Up-regulated during skeletal muscle growth protei     | USMG5         | 560880000 | -1.23414 |
| P09012    | U1 small nuclear ribonucleoprotein A                  | SNRPA         | 1.216E+09 | -1.2338  |
| O00231    | 26S proteasome non-ATPase regulatory subunit 11       | PSMD11        | 6.042E+09 | -1.2278  |

|           |                                                                     |                |           |          |
|-----------|---------------------------------------------------------------------|----------------|-----------|----------|
| Q9NRG9    | Aladin                                                              | AAAS           | 183210000 | -1.22557 |
| P61421    | V-type proton ATPase subunit d 1                                    | ATP6V0D1       | 61538000  | -1.21781 |
| Q53H96    | Pyrroline-5-carboxylate reductase 3                                 | PYCRL          | 135600000 | -1.21087 |
| O75616    | GTPase Era, mitochondrial                                           | ERAL1          | 225930000 | -1.20878 |
| O75410    | Transforming acidic coiled-coil-containing protein : TACC1          |                | 30970000  | -1.20763 |
| Q16537    | Serine/threonine-protein phosphatase 2A 56 kDa r PPP2R5E            |                | 735650000 | -1.20275 |
| Q9UII2    | ATPase inhibitor, mitochondrial                                     | ATPIF1         | 469840000 | -1.20033 |
| Q9Y316    | Protein MEMO1                                                       | MEMO1          | 907900000 | -1.19883 |
| P07686    | Beta-hexosaminidase subunit beta;Beta-hexosaminidase                | HEXB           | 2.035E+09 | -1.19778 |
| P27708    | CAD protein;Glutamine-dependent carbamoyl-phosphate synthase        | CAD            | 1.021E+10 | -1.1953  |
| P00387    | NADH-cytochrome b5 reductase 3;NADH-cytochrome b5 reductase         | CYB5R3         | 4.473E+09 | -1.18965 |
| P51970    | NADH dehydrogenase [ubiquinone] 1 alpha subunit                     | NDUFA8         | 1.013E+09 | -1.18904 |
| P49406    | 39S ribosomal protein L19, mitochondrial                            | MRPL19         | 332080000 | -1.1882  |
| P51665    | 26S proteasome non-ATPase regulatory subunit 7                      | PSMD7          | 3.118E+09 | -1.1875  |
| O60684;O1 | Importin subunit alpha-7;Importin subunit alpha-6                   | KPNA6;KPNA5    | 981460000 | -1.18035 |
| Q658Y4    | Protein FAM91A1                                                     | FAM91A1        | 291070000 | -1.17854 |
| O75531    | Barrier-to-autointegration factor;Barrier-to-autointegration factor | BANF1          | 506540000 | -1.17771 |
| Q8N6M0    | OTU domain-containing protein 6B                                    | OTUD6B         | 134120000 | -1.17625 |
| Q92609    | TBC1 domain family member 5                                         | TBC1D5         | 377400000 | -1.17428 |
| Q09028    | Histone-binding protein RBBP4                                       | RBBP4          | 3.909E+09 | -1.17247 |
| Q9BR76    | Coronin-1B                                                          | CORO1B         | 2.267E+09 | -1.1704  |
| P13796    | Plastin-2                                                           | LCP1           | 180620000 | -1.16877 |
| Q9BUK6    | Protein misato homolog 1                                            | MSTO1          | 120820000 | -1.1665  |
| Q99623    | Prohibitin-2                                                        | PHB2           | 1.203E+10 | -1.16438 |
| P53680    | AP-2 complex subunit sigma                                          | AP2S1          | 279760000 | -1.16239 |
| O43172    | U4/U6 small nuclear ribonucleoprotein Prp4                          | PRPF4          | 290800000 | -1.16194 |
| Q99470    | Stromal cell-derived factor 2                                       | SDF2           | 117310000 | -1.16074 |
| Q14204    | Cytoplasmic dynein 1 heavy chain 1                                  | DYNC1H1        | 6.145E+10 | -1.15714 |
| Q9NXH9    | tRNA (guanine(26)-N(2))-dimethyltransferase                         | TRMT1          | 263570000 | -1.1543  |
| Q9GZM5    | Protein YIPF3;Protein YIPF3, 36 kDa form III                        | YIPF3          | 135020000 | -1.15395 |
| P43155    | Carnitine O-acetyltransferase                                       | CRAT           | 162650000 | -1.1523  |
| P05455    | Lupus La protein                                                    | SSB            | 7.417E+09 | -1.15159 |
| P47985;P0 | Cytochrome b-c1 complex subunit Rieske, mitochondrial               | UQCRFS1;UQCRFS | 1.667E+09 | -1.14961 |
| P28070    | Proteasome subunit beta type-4                                      | PSMB4          | 5.123E+09 | -1.14216 |
| P20618    | Proteasome subunit beta type-1                                      | PSMB1          | 4.893E+09 | -1.14204 |
| O00264    | Membrane-associated progesterone receptor component 1               | PGRMC1         | 402490000 | -1.14135 |
| Q6RW13    | Type-1 angiotensin II receptor-associated protein                   | AGTRAP         | 215630000 | -1.14078 |
| Q15003    | Condensin complex subunit 2                                         | NCAPH          | 669940000 | -1.14052 |
| Q16795    | NADH dehydrogenase [ubiquinone] 1 alpha subunit                     | NDUFA9         | 1.577E+09 | -1.13751 |
| Q9NP97    | Dynein light chain roadblock-type 1                                 | DYNLRB1        | 273770000 | -1.13402 |
| O14980    | Exportin-1                                                          | XPO1           | 9.044E+09 | -1.13226 |
| Q96RE7    | Nucleus accumbens-associated protein 1                              | NACC1          | 76208000  | -1.12807 |
| P05067    | Amyloid beta A4 protein;N-APP;Soluble APP-alpha                     | APP            | 17893000  | -1.12549 |
| P50748    | Kinetochores-associated protein 1                                   | KNTC1          | 163140000 | -1.1192  |
| Q6Y7W6    | PERQ amino acid-rich with GYF domain-containing protein             | GIGYF2         | 862790000 | -1.11726 |
| P51572    | B-cell receptor-associated protein 31                               | BCAP31         | 2.206E+09 | -1.11599 |
| Q9HCC0    | Methylcrotonoyl-CoA carboxylase beta chain, mitochondrial           | MCCC2          | 644180000 | -1.11594 |
| Q9Y5S2    | Serine/threonine-protein kinase MRCK beta                           | CDC42BPB       | 441920000 | -1.11121 |
| Q8TEA8    | D-tyrosyl-tRNA(Tyr) deacylase 1                                     | DTD1           | 147180000 | -1.11016 |
| P48059    | LIM and senescent cell antigen-like-containing domain               | LIMS1          | 194750000 | -1.10556 |

|            |                                                      |                |           |          |
|------------|------------------------------------------------------|----------------|-----------|----------|
| Q7L014     | Probable ATP-dependent RNA helicase DDX46            | DDX46          | 1.456E+09 | -1.10209 |
| Q9BW27     | Nuclear pore complex protein Nup85                   | NUP85          | 193100000 | -1.10117 |
| P53367     | Arfaptin-1                                           | ARFIP1         | 484560000 | -1.09674 |
| Q9BRP1     | Programmed cell death protein 2-like                 | PDCD2L         | 250780000 | -1.0948  |
| O75251     | NADH dehydrogenase [ubiquinone] iron-sulfur pro      | NDUFS7         | 453570000 | -1.09372 |
| Q5H9R7     | Serine/threonine-protein phosphatase 6 regulator     | PPP6R3         | 894000000 | -1.09022 |
| P12109     | Collagen alpha-1(VI) chain                           | COL6A1         | 206900000 | -1.08627 |
| Q9NXF1     | Testis-expressed sequence 10 protein                 | TEX10          | 220760000 | -1.0859  |
| P04350     | Tubulin beta-4A chain                                | TUBB4A         | 1.144E+11 | -1.08578 |
| P25788     | Proteasome subunit alpha type-3                      | PSMA3          | 2.605E+09 | -1.07872 |
| O75676     | Ribosomal protein S6 kinase alpha-4                  | RPS6KA4        | 33136000  | -1.07852 |
| P01889     | HLA class I histocompatibility antigen, B-7 alpha ch | HLA-B          | 110970000 | -1.071   |
| P23588     | Eukaryotic translation initiation factor 4B          | EIF4B          | 1.883E+09 | -1.06798 |
| Q9H6T3     | RNA polymerase II-associated protein 3               | RPAP3          | 460720000 | -1.06476 |
| Q8WWY3     | U4/U6 small nuclear ribonucleoprotein Prp31          | PRPF31         | 776620000 | -1.05886 |
| P60900     | Proteasome subunit alpha type-6                      | PSMA6          | 2.622E+09 | -1.05511 |
| Q9Y312     | Protein AAR2 homolog                                 | AAR2           | 352830000 | -1.05071 |
| P40616     | ADP-ribosylation factor-like protein 1               | ARL1           | 1.185E+09 | -1.04897 |
| Q9UNF0     | Protein kinase C and casein kinase substrate in neu  | PACSIN2        | 693090000 | -1.04678 |
| Q92696     | Geranylgeranyl transferase type-2 subunit alpha      | RABGGTA        | 794020000 | -1.04428 |
| Q99805     | Transmembrane 9 superfamily member 2                 | TM9SF2         | 596700000 | -1.04086 |
| P52789     | Hexokinase-2                                         | HK2            | 1.881E+09 | -1.04031 |
| Q9UHG3     | Prenylcysteine oxidase 1                             | PCYOX1         | 492910000 | -1.03597 |
| Q9BZK7     | F-box-like/WD repeat-containing protein TBL1XR1      | TBL1XR1        | 212050000 | -1.03545 |
| Q99538     | Legumain                                             | LGMN           | 417410000 | -1.03476 |
| P49770     | Translation initiation factor eIF-2B subunit beta    | EIF2B2         | 869490000 | -1.03303 |
| Q10471     | Polypeptide N-acetylgalactosaminyltransferase 2;P    | GALNT2         | 722040000 | -1.03267 |
| Q15276     | Rab GTPase-binding effector protein 1                | RABEP1         | 247920000 | -1.03262 |
| Q99439     | Calponin-2                                           | CNN2           | 708990000 | -1.02541 |
| P51659     | Peroxisomal multifunctional enzyme type 2;(3R)-h     | HSD17B4        | 2.172E+09 | -1.01585 |
| O15270     | Serine palmitoyltransferase 2                        | SPTLC2         | 318320000 | -1.01336 |
| P62308;A81 | Small nuclear ribonucleoprotein G;Putative small n   | SNRPG;SNRPGP15 | 1.257E+09 | -1.00563 |
| Q09666     | Neuroblast differentiation-associated protein AHN    | AHNAK          | 5.59E+10  | -1.00372 |
| Q02218     | 2-oxoglutarate dehydrogenase, mitochondrial          | OGDH           | 2.393E+09 | -1.0026  |
| P46063     | ATP-dependent DNA helicase Q1                        | RECQL          | 2.237E+09 | -1.00117 |
| Q14728     | Major facilitator superfamily domain-containing pr   | MFSD10         | 57950000  | -1.00051 |
| Q9UIC8     | Leucine carboxyl methyltransferase 1                 | LCMT1          | 432390000 | -0.99714 |
| P54652     | Heat shock-related 70 kDa protein 2                  | HSPA2          | 151020000 | -0.996   |
| Q6NUK1     | Calcium-binding mitochondrial carrier protein ScaI   | SLC25A24       | 525930000 | -0.99141 |
| Q13671     | Ras and Rab interactor 1                             | RIN1           | 413180000 | -0.99107 |
| P63167;Q9  | Dynein light chain 1, cytoplasmic;Dynein light chair | DYNLL1;DYNLL2  | 353500000 | -0.9773  |
| Q969F1     | General transcription factor 3C polypeptide 6        | GTF3C6         | 163910000 | -0.97262 |
| P98194     | Calcium-transporting ATPase type 2C member 1         | ATP2C1         | 52988000  | -0.9716  |
| P61764     | Syntaxin-binding protein 1                           | STXBP1         | 1.256E+09 | -0.97059 |
| Q96M27     | Protein PRRC1                                        | PRRC1          | 562590000 | -0.97    |
| Q9NPQ8     | Synembryn-A                                          | RIC8A          | 895440000 | -0.96871 |
| O14818     | Proteasome subunit alpha type-7                      | PSMA7          | 5.864E+09 | -0.96639 |
| Q04637     | Eukaryotic translation initiation factor 4 gamma 1   | EIF4G1         | 1.483E+10 | -0.9659  |
| Q10469     | Alpha-1,6-mannosyl-glycoprotein 2-beta-N-acetylg     | MGAT2          | 99790000  | -0.96413 |
| Q53H12     | Acylglycerol kinase, mitochondrial                   | AGK            | 2.526E+09 | -0.96346 |

|           |                                                      |               |           |          |
|-----------|------------------------------------------------------|---------------|-----------|----------|
| Q9BRJ2    | 39S ribosomal protein L45, mitochondrial             | MRPL45        | 345630000 | -0.95093 |
| P25789    | Proteasome subunit alpha type-4                      | PSMA4         | 2.268E+09 | -0.94598 |
| Q9GZT3    | SRA stem-loop-interacting RNA-binding protein, m     | SLIRP         | 911780000 | -0.94487 |
| Q96JM3    | Chromosome alignment-maintaining phosphoprot         | CHAMP1        | 115000000 | -0.94175 |
| Q9NR46    | Endophilin-B2                                        | SH3GLB2       | 167710000 | -0.94082 |
| Q16186    | Proteasomal ubiquitin receptor                       | ADRM1         | 906140000 | -0.93866 |
| Q8TB36    | Ganglioside-induced differentiation-associated prc   | GDAP1         | 45867000  | -0.93791 |
| P30530    | Tyrosine-protein kinase receptor UFO                 | AXL           | 23382000  | -0.93687 |
| Q99570    | Phosphoinositide 3-kinase regulatory subunit 4       | PIK3R4        | 155800000 | -0.93658 |
| O75351    | Vacuolar protein sorting-associated protein 4B       | VPS4B         | 134110000 | -0.93131 |
| P35221    | Catenin alpha-1                                      | CTNNA1        | 467260000 | -0.92679 |
| Q9NVA1    | Ubiquinol-cytochrome-c reductase complex assem       | UQCC1         | 176970000 | -0.92628 |
| P56385    | ATP synthase subunit e, mitochondrial                | ATP5I         | 336080000 | -0.92297 |
| O43819    | Protein SCO2 homolog, mitochondrial                  | SCO2          | 155470000 | -0.92139 |
| Q9NUM3    | Zinc transporter ZIP9                                | SLC39A9       | 11939000  | -0.92063 |
| Q7L523;Q5 | Ras-related GTP-binding protein A;Ras-related GTF    | RRAGA;RRAGB   | 225050000 | -0.91974 |
| Q5J8M3    | ER membrane protein complex subunit 4                | EMC4          | 167140000 | -0.91579 |
| Q14203    | Dynactin subunit 1                                   | DCTN1         | 4.44E+09  | -0.9152  |
| P05198    | Eukaryotic translation initiation factor 2 subunit 1 | EIF2S1        | 7.071E+09 | -0.90274 |
| Q15334    | Lethal(2) giant larvae protein homolog 1             | LLGL1         | 109390000 | -0.90155 |
| Q05048    | Cleavage stimulation factor subunit 1                | CSTF1         | 327190000 | -0.90055 |
| O60885    | Bromodomain-containing protein 4                     | BRD4          | 121780000 | -0.89623 |
| Q9GZS3    | WD repeat-containing protein 61;WD repeat-conta      | WDR61         | 414510000 | -0.89214 |
| P57737    | Coronin-7                                            | CORO7         | 363520000 | -0.89212 |
| P07384    | Calpain-1 catalytic subunit                          | CAPN1         | 4.366E+09 | -0.89118 |
| P62273    | 40S ribosomal protein S29                            | RPS29         | 885610000 | -0.88854 |
| Q7L2H7    | Eukaryotic translation initiation factor 3 subunit M | EIF3M         | 4.94E+09  | -0.88803 |
| Q9NQG5    | Regulation of nuclear pre-mRNA domain-containin      | RPRD1B        | 1.003E+09 | -0.88367 |
| Q9BRT2    | Ubiquinol-cytochrome-c reductase complex assem       | UQCC2         | 255830000 | -0.88275 |
| Q9Y6C9    | Mitochondrial carrier homolog 2                      | MTCH2         | 766960000 | -0.8827  |
| Q9Y512    | Sorting and assembly machinery component 50 ho       | SAMM50        | 308540000 | -0.88207 |
| Q969X5    | Endoplasmic reticulum-Golgi intermediate compar      | ERGIC1        | 500180000 | -0.8792  |
| Q71U36;P0 | Tubulin alpha-1A chain;Tubulin alpha-3E chain        | TUBA1A;TUBA3E | 806080000 | -0.8759  |
| Q9H061    | Transmembrane protein 126A                           | TMEM126A      | 146330000 | -0.87269 |
| Q9Y2V7    | Conserved oligomeric Golgi complex subunit 6         | COG6          | 192940000 | -0.87263 |
| Q9P258    | Protein RCC2                                         | RCC2          | 3.25E+09  | -0.86616 |
| Q9P2J5    | Leucine--tRNA ligase, cytoplasmic                    | LARS          | 9.655E+09 | -0.86428 |
| Q9UG63    | ATP-binding cassette sub-family F member 2           | ABCF2         | 1.547E+09 | -0.86353 |
| P52292    | Importin subunit alpha-1                             | KPNA2         | 3.897E+09 | -0.86341 |
| Q9NQ48    | Leucine zipper transcription factor-like protein 1   | LZTFL1        | 291170000 | -0.85933 |
| Q9NYB0    | Telomeric repeat-binding factor 2-interacting prote  | TERF2IP       | 231540000 | -0.85461 |
| Q969G5    | Protein kinase C delta-binding protein               | PRKCDBP       | 347540000 | -0.85298 |
| Q9Y2R5    | 28S ribosomal protein S17, mitochondrial             | MRPS17        | 172280000 | -0.85274 |
| P35241    | Radixin                                              | RDX           | 757130000 | -0.8518  |
| P98179    | RNA-binding protein 3                                | RBM3          | 1.708E+09 | -0.84942 |
| Q13438    | Protein OS-9                                         | OS9           | 322080000 | -0.84824 |
| P60059    | Protein transport protein Sec61 subunit gamma        | SEC61G        | 691370000 | -0.84756 |
| O75489    | NADH dehydrogenase [ubiquinone] iron-sulfur pro      | NDUFS3        | 2.482E+09 | -0.84117 |
| O15258    | Protein RER1                                         | RER1          | 757860000 | -0.8404  |
| Q13322    | Growth factor receptor-bound protein 10              | GRB10         | 121080000 | -0.8397  |

|        |                                                            |         |                  |          |
|--------|------------------------------------------------------------|---------|------------------|----------|
| Q13409 | Cytoplasmic dynein 1 intermediate chain 2                  | DYNC1I2 | 2.388E+09        | -0.83482 |
| Q14103 | Heterogeneous nuclear ribonucleoprotein D0                 | HNRNPD  | 6.653E+09        | -0.83432 |
| Q9BTE1 | Dynactin subunit 5                                         | DCTN5   | 140700000        | -0.83112 |
| Q8WWM7 | Ataxin-2-like protein                                      | ATXN2L  | 1.068E+09        | -0.82653 |
| Q6PJG6 | BRCA1-associated ATM activator 1                           | BRAT1   | 143650000        | -0.81782 |
| O14828 | Secretory carrier-associated membrane protein 3            | SCAMP3  | 1.007E+09        | -0.81678 |
| Q9UEW8 | STE20/SPS1-related proline-alanine-rich protein kinase     | STK39   | 327540000        | -0.81429 |
| Q9Y6M7 | Sodium bicarbonate cotransporter 3                         | SLC4A7  | 566650000        | -0.81404 |
| P23368 | NAD-dependent malic enzyme, mitochondrial                  | ME2     | 868270000        | -0.81114 |
| P08865 | 40S ribosomal protein SA                                   | RPSA    | 9.036E+09        | -0.80996 |
| Q9UJW0 | Dynactin subunit 4                                         | DCTN4   | 358390000        | -0.80922 |
| Q14919 | Dr1-associated corepressor                                 | DRAP1   | 342740000        | -0.80886 |
| Q96FX7 | tRNA (adenine(58)-N(1))-methyltransferase catalytic        | TRMT61A | 151010000        | -0.80859 |
| Q92599 | Septin-8                                                   |         | Sep-08 119650000 | -0.80851 |
| O96000 | NADH dehydrogenase [ubiquinone] 1 beta subcomplex          | NDUFB10 | 428090000        | -0.79828 |
| P62310 | U6 snRNA-associated Sm-like protein LSM3                   | LSM3    | 68822000         | -0.79736 |
| Q96A65 | Exocyst complex component 4                                | EXOC4   | 624150000        | -0.79656 |
| Q5VWZ2 | Lysophospholipase-like protein 1                           | LYPLAL1 | 269010000        | -0.79517 |
| Q13405 | 39S ribosomal protein L49, mitochondrial                   | MRPL49  | 79903000         | -0.79157 |
| Q9UHV9 | Prefoldin subunit 2                                        | PFDN2   | 359220000        | -0.78868 |
| Q9Y4P1 | Cysteine protease ATG4B                                    | ATG4B   | 305210000        | -0.78808 |
| P08574 | Cytochrome c1, heme protein, mitochondrial                 | CYC1    | 1.038E+09        | -0.78602 |
| P55036 | 26S proteasome non-ATPase regulatory subunit 4             | PSMD4   | 3.036E+09        | -0.78321 |
| P30533 | Alpha-2-macroglobulin receptor-associated protein          | LRPAP1  | 517300000        | -0.78028 |
| Q8N357 | Solute carrier family 35 member F6                         | SLC35F6 | 19190000         | -0.777   |
| P35610 | Sterol O-acyltransferase 1                                 | SOAT1   | 1.045E+09        | -0.77133 |
| O14579 | Coatomer subunit epsilon                                   | COPE    | 1.321E+09        | -0.77043 |
| Q13131 | 5-AMP-activated protein kinase catalytic subunit alpha     | PRKAA1  | 312440000        | -0.76867 |
| Q6P996 | Pyridoxal-dependent decarboxylase domain-containing        | PDXDC1  | 444390000        | -0.76518 |
| P42285 | Superkiller viralicidal activity 2-like 2                  | SKIV2L2 | 1.322E+09        | -0.76418 |
| Q96EP5 | DAZ-associated protein 1                                   | DAZAP1  | 1.375E+09        | -0.7623  |
| P51532 | Transcription activator BRG1                               | SMARCA4 | 628490000        | -0.76121 |
| P07602 | Prosaposin;Saposin-A;Saposin-B-Val;Saposin-B;Saposin-C     | PSAP    | 54197000         | -0.76059 |
| Q9UPN3 | Microtubule-actin cross-linking factor 1, isoforms 1 and 2 | MACF1   | 1.535E+09        | -0.759   |
| P35579 | Myosin-9                                                   | MYH9    | 1.703E+11        | -0.75817 |
| P07437 | Tubulin beta chain                                         | TUBB    | 4.728E+10        | -0.75744 |
| P15927 | Replication protein A 32 kDa subunit                       | RPA2    | 1.275E+09        | -0.7563  |
| Q9Y6A9 | Signal peptidase complex subunit 1                         | SPCS1   | 203200000        | -0.75452 |
| O14617 | AP-3 complex subunit delta-1                               | AP3D1   | 2.524E+09        | -0.75223 |
| P55209 | Nucleosome assembly protein 1-like 1                       | NAP1L1  | 1.631E+10        | -0.74721 |
| Q7L0Y3 | Mitochondrial ribonuclease P protein 1                     | TRMT10C | 508700000        | -0.74569 |
| P60709 | Actin, cytoplasmic 1;Actin, cytoplasmic 1, N-terminal      | ACTB    | 4.922E+09        | -0.74466 |
| Q9NQ50 | 39S ribosomal protein L40, mitochondrial                   | MRPL40  | 351320000        | -0.73701 |
| Q86Y56 | Dynein assembly factor 5, axonemal                         | DNAAF5  | 993780000        | -0.73021 |
| Q9GZP4 | PITH domain-containing protein 1                           | PITHD1  | 290560000        | -0.72965 |
| Q3ZCQ8 | Mitochondrial import inner membrane translocase            | TIMM50  | 1.588E+09        | -0.72864 |
| Q9BYD3 | 39S ribosomal protein L4, mitochondrial                    | MRPL4   | 911790000        | -0.72785 |
| Q9UBD5 | Origin recognition complex subunit 3                       | ORC3    | 69871000         | -0.72361 |
| Q9UPT5 | Exocyst complex component 7                                | EXOC7   | 275330000        | -0.7231  |
| Q9Y4J8 | Dystrobrevin alpha                                         | DTNA    | 126520000        | -0.72247 |

|           |                                                       |              |           |          |
|-----------|-------------------------------------------------------|--------------|-----------|----------|
| Q9H444    | Charged multivesicular body protein 4b                | CHMP4B       | 918940000 | -0.71895 |
| Q8WVV9    | Heterogeneous nuclear ribonucleoprotein L-like        | HNRNPLL      | 127870000 | -0.7177  |
| Q13347    | Eukaryotic translation initiation factor 3 subunit I  | EIF3I        | 4.481E+09 | -0.71694 |
| P04920    | Anion exchange protein 2                              | SLC4A2       | 127900000 | -0.71659 |
| Q14573    | Inositol 1,4,5-trisphosphate receptor type 3          | ITPR3        | 63540000  | -0.71536 |
| Q9UL15    | BAG family molecular chaperone regulator 5            | BAG5         | 898050000 | -0.71506 |
| Q9C0E8    | Protein lunapark                                      | LNP          | 134220000 | -0.71153 |
| O14776    | Transcription elongation regulator 1                  | TCERG1       | 342100000 | -0.7089  |
| P50281    | Matrix metalloproteinase-14                           | MMP14        | 465020000 | -0.70675 |
| O60645    | Exocyst complex component 3                           | EXOC3        | 223830000 | -0.70227 |
| Q9UDW1    | Cytochrome b-c1 complex subunit 9                     | UQCR10       | 762950000 | -0.7008  |
| Q86Y39    | NADH dehydrogenase [ubiquinone] 1 alpha subcor        | NDUFA11      | 82936000  | -0.69782 |
| Q96IU4    | Alpha/beta hydrolase domain-containing protein 1      | ABHD14B      | 160690000 | -0.69601 |
| Q9HBI1    | Beta-parvin                                           | PARVB        | 535790000 | -0.69487 |
| Q9NYB9    | Abl interactor 2                                      | ABI2         | 32609000  | -0.69434 |
| Q99653    | Calcineurin B homologous protein 1                    | CHP1         | 215150000 | -0.69395 |
| Q14152    | Eukaryotic translation initiation factor 3 subunit A  | EIF3A        | 1.543E+10 | -0.68617 |
| Q9BVC6    | Transmembrane protein 109                             | TMEM109      | 749950000 | -0.68472 |
| Q9UM00    | Transmembrane and coiled-coil domain-containing       | TMCO1        | 805420000 | -0.68307 |
| P25786    | Proteasome subunit alpha type-1                       | PSMA1        | 3.47E+09  | -0.67758 |
| P26358    | DNA (cytosine-5)-methyltransferase 1                  | DNMT1        | 1.396E+09 | -0.67653 |
| Q92572    | AP-3 complex subunit sigma-1                          | AP3S1        | 143820000 | -0.67504 |
| P61619    | Protein transport protein Sec61 subunit alpha isofo   | SEC61A1      | 809340000 | -0.66951 |
| Q9Y262    | Eukaryotic translation initiation factor 3 subunit L  | EIF3L        | 7.312E+09 | -0.66587 |
| Q13257    | Mitotic spindle assembly checkpoint protein MAD2      | MAD2L1       | 296840000 | -0.665   |
| O95831    | Apoptosis-inducing factor 1, mitochondrial            | AIFM1        | 3.25E+09  | -0.66436 |
| Q08J23    | tRNA (cytosine(34)-C(5))-methyltransferase            | NSUN2        | 2.259E+09 | -0.66144 |
| P51159    | Ras-related protein Rab-27A                           | RAB27A       | 126500000 | -0.66013 |
| Q96CW1    | AP-2 complex subunit mu                               | AP2M1        | 1.323E+09 | -0.65993 |
| Q9Y294    | Histone chaperone ASF1A                               | ASF1A        | 148540000 | -0.6597  |
| P67936    | Tropomyosin alpha-4 chain                             | TPM4         | 6.52E+09  | -0.65748 |
| P19022    | Cadherin-2                                            | CDH2         | 250970000 | -0.65671 |
| Q8IZ07    | Ankyrin repeat domain-containing protein 13A          | ANKRD13A     | 97311000  | -0.65399 |
| O60664    | Perilipin-3                                           | PLIN3        | 3.562E+09 | -0.65376 |
| O00203    | AP-3 complex subunit beta-1                           | AP3B1        | 969820000 | -0.65186 |
| Q53H82    | Beta-lactamase-like protein 2                         | LACTB2       | 247420000 | -0.65059 |
| Q93009    | Ubiquitin carboxyl-terminal hydrolase 7               | USP7         | 2.946E+09 | -0.65027 |
| O00743    | Serine/threonine-protein phosphatase 6 catalytic s    | PPP6C        | 419040000 | -0.64981 |
| Q9UBI6    | Guanine nucleotide-binding protein G(I)/G(S)/G(O)     | GNG12        | 164320000 | -0.64721 |
| Q05209    | Tyrosine-protein phosphatase non-receptor type 1      | PTPN12       | 93081000  | -0.64116 |
| Q00325    | Phosphate carrier protein, mitochondrial              | SLC25A3      | 4.509E+09 | -0.63973 |
| Q9Y4C2    | TRPM8 channel-associated factor 1                     | TCAF1        | 485220000 | -0.63867 |
| P09488;Q0 | Glutathione S-transferase Mu 1;Glutathione S-tran     | GSTM1;GSTM4  | 117030000 | -0.63505 |
| P06730    | Eukaryotic translation initiation factor 4E           | EIF4E        | 1.683E+09 | -0.63463 |
| Q6NYC1    | Bifunctional arginine demethylase and lysyl-hydro     | JMJD6        | 631670000 | -0.63163 |
| Q9HBL7    | Plasminogen receptor (KT)                             | PLGRKT       | 71877000  | -0.62891 |
| Q96T76    | MMS19 nucleotide excision repair protein homolo       | MMS19        | 1.046E+09 | -0.62295 |
| Q99613;B5 | Eukaryotic translation initiation factor 3 subunit C; | EIF3C;EIF3CL | 1.141E+10 | -0.62181 |
| Q9Y2T2    | AP-3 complex subunit mu-1                             | AP3M1        | 199780000 | -0.6216  |
| P52434    | DNA-directed RNA polymerases I, II, and III subunit   | POLR2H       | 126020000 | -0.6215  |



|           |                                                     |                |           |          |
|-----------|-----------------------------------------------------|----------------|-----------|----------|
| Q9H9B4    | Sideroflexin-1                                      | SFXN1          | 3.699E+09 | -0.61977 |
| Q96K17    | Transcription factor BTF3 homolog 4                 | BTF3L4         | 961250000 | -0.61938 |
| Q8WVJ2    | NudC domain-containing protein 2                    | NUDCD2         | 285100000 | -0.61746 |
| O95104    | Splicing factor, arginine/serine-rich 15            | SCAF4          | 705060000 | -0.61633 |
| P62136    | Serine/threonine-protein phosphatase PP1-alpha c    | PPP1CA         | 2.508E+09 | -0.61584 |
| Q14669    | E3 ubiquitin-protein ligase TRIP12                  | TRIP12         | 1.022E+09 | -0.6132  |
| O43670    | BUB3-interacting and GLEBS motif-containing prot    | ZNF207         | 531130000 | -0.6127  |
| Q96ST3    | Paired amphipathic helix protein Sin3a              | SIN3A          | 249840000 | -0.61043 |
| O75909    | Cyclin-K                                            | CCNK           | 289580000 | -0.60797 |
| P53990    | IST1 homolog                                        | IST1           | 495620000 | -0.60636 |
| O60518    | Ran-binding protein 6                               | RANBP6         | 6614600   | -0.60102 |
| Q8TED1    | Probable glutathione peroxidase 8                   | GPX8           | 78499000  | -0.59971 |
| Q8N5K1    | CDGSH iron-sulfur domain-containing protein 2       | CISD2          | 529050000 | -0.59873 |
| Q9BYI3    | Hyccin                                              | FAM126A        | 124130000 | -0.59686 |
| Q66K74    | Microtubule-associated protein 1S;MAP1S heavy c     | MAP1S          | 622560000 | -0.59679 |
| Q9Y5K6    | CD2-associated protein                              | CD2AP          | 583460000 | -0.59475 |
| O00159    | Unconventional myosin-Ic                            | MYO1C          | 3.372E+09 | -0.59201 |
| P20700    | Lamin-B1                                            | LMNB1          | 590050000 | -0.58567 |
| O60884    | DnaJ homolog subfamily A member 2                   | DNAJA2         | 1.342E+09 | -0.58235 |
| Q5VIR6    | Vacuolar protein sorting-associated protein 53 hor  | VPS53          | 296350000 | -0.5802  |
| Q8TCJ2    | Dolichyl-diphosphooligosaccharide--protein glycos   | STT3B          | 990060000 | -0.5791  |
| Q9NYP7    | Elongation of very long chain fatty acids protein 5 | ELOVL5         | 428300000 | -0.5789  |
| O95071    | E3 ubiquitin-protein ligase UBR5                    | UBR5           | 241830000 | -0.57871 |
| Q16566    | Calcium/calmodulin-dependent protein kinase typ     | CAMK4          | 64102000  | -0.57858 |
| Q6P1M0    | Long-chain fatty acid transport protein 4           | SLC27A4        | 486420000 | -0.57774 |
| P17152    | Transmembrane protein 11, mitochondrial             | TMEM11         | 51356000  | -0.57494 |
| P56134    | ATP synthase subunit f, mitochondrial               | ATP5J2         | 2.404E+09 | -0.57414 |
| Q5BJD5    | Transmembrane protein 41B                           | TMEM41B        | 50324000  | -0.57381 |
| Q9H857    | 5-nucleotidase domain-containing protein 2          | NT5DC2         | 985060000 | -0.57085 |
| P62191    | 26S protease regulatory subunit 4                   | PSMC1          | 9.102E+09 | -0.56029 |
| P09211    | Glutathione S-transferase P                         | GSTP1          | 1.821E+10 | -0.55912 |
| Q9Y6R0    | Numb-like protein                                   | NUMBL          | 30015000  | -0.55854 |
| Q96GD0    | Pyridoxal phosphate phosphatase                     | PDXP           | 231700000 | -0.55837 |
| P82650    | 28S ribosomal protein S22, mitochondrial            | MRPS22         | 581160000 | -0.55637 |
| Q9NW64    | Pre-mRNA-splicing factor RBM22                      | RBM22          | 87189000  | -0.55564 |
| Q9H2K8    | Serine/threonine-protein kinase TAO3                | TAOK3          | 60317000  | -0.553   |
| P62314    | Small nuclear ribonucleoprotein Sm D1               | SNRPD1         | 1.448E+09 | -0.55169 |
| Q8NB16    | Mixed lineage kinase domain-like protein            | MLKL           | 69997000  | -0.54903 |
| Q5JVF3    | PCI domain-containing protein 2                     | PCID2          | 495190000 | -0.54872 |
| A6NHL2    | Tubulin alpha chain-like 3                          | TUBAL3         | 227070000 | -0.54716 |
| Q9BSR8    | Protein YIPF4                                       | YIPF4          | 103420000 | -0.5469  |
| O95298;E9 | NADH dehydrogenase [ubiquinone] 1 subunit C2;N      | NDUFC2;NDUFC2- | 51695000  | -0.54596 |
| P09669    | Cytochrome c oxidase subunit 6C                     | COX6C          | 588050000 | -0.54423 |
| P82979    | SAP domain-containing ribonucleoprotein             | SARNP          | 862100000 | -0.54301 |
| O94776    | Metastasis-associated protein MTA2                  | MTA2           | 688070000 | -0.53941 |
| Q5TZA2    | Rootletin                                           | CROCC          | 169810000 | -0.537   |
| Q8N983    | 39S ribosomal protein L43, mitochondrial            | MRPL43         | 487470000 | -0.53599 |
| Q14008    | Cytoskeleton-associated protein 5                   | CKAP5          | 3.098E+09 | -0.53314 |
| Q96CS3    | FAS-associated factor 2                             | FAF2           | 2.07E+09  | -0.52805 |
| P78527    | DNA-dependent protein kinase catalytic subunit      | PRKDC          | 2.851E+10 | -0.52642 |

|                      |                                                           |                |           |          |
|----------------------|-----------------------------------------------------------|----------------|-----------|----------|
| Q9UHI6               | Probable ATP-dependent RNA helicase DDX20                 | DDX20          | 835820000 | -0.52381 |
| Q15654               | Thyroid receptor-interacting protein 6                    | TRIP6          | 766270000 | -0.5178  |
| P0CW20;PC            | LIM and senescent cell antigen-like-containing domain     | LIMS3L;LIMS3   | 104330000 | -0.51706 |
| Q13547               | Histone deacetylase 1                                     | HDAC1          | 1.069E+09 | -0.51282 |
| P30084               | Enoyl-CoA hydratase, mitochondrial                        | ECHS1          | 2.874E+09 | -0.50699 |
| Q9Y6D9               | Mitotic spindle assembly checkpoint protein MAD1          | MAD1L1         | 119180000 | -0.50631 |
| Q969E2               | Secretory carrier-associated membrane protein 4           | SCAMP4         | 52853000  | -0.50249 |
| Q9H9A5               | CCR4-NOT transcription complex subunit 10                 | CNOT10         | 124390000 | -0.50192 |
| Q10570               | Cleavage and polyadenylation specificity factor subunit 1 | CPSF1          | 88119000  | -0.50038 |
| Q9P032               | NADH dehydrogenase [ubiquinone] 1 alpha subunit           | NDUFA4         | 556780000 | -0.50009 |
| Q9UJS0               | Calcium-binding mitochondrial carrier protein Aralar 1    | SLC25A13       | 2.749E+09 | -0.49888 |
| Q9UKY1               | Zinc fingers and homeobox protein 1                       | ZHX1           | 90546000  | -0.49533 |
| P12270               | Nucleoprotein TPR                                         | TPR            | 2.062E+09 | -0.49431 |
| O95477               | ATP-binding cassette sub-family A member 1                | ABCA1          | 158420000 | -0.49409 |
| Q9BZX2               | Uridine-cytidine kinase 2                                 | UCK2           | 955610000 | -0.49277 |
| O15260               | Surfeit locus protein 4                                   | SURF4          | 2.573E+09 | -0.49028 |
| Q8N2K0               | Monoacylglycerol lipase ABHD12                            | ABHD12         | 42593000  | -0.48744 |
| P10619               | Lysosomal protective protein 1                            | CTSA           | 371910000 | -0.48707 |
| Q92769               | Histone deacetylase 2                                     | HDAC2          | 280440000 | -0.4831  |
| P08123               | Collagen alpha-2(I) chain                                 | COL1A2         | 16980000  | -0.48138 |
| P30536               | Translocator protein                                      | TSPO           | 137650000 | -0.47935 |
| Q13505               | Metaxin-1                                                 | MTX1           | 205580000 | -0.478   |
| P60228               | Eukaryotic translation initiation factor 3 subunit E      | EIF3E          | 8.167E+09 | -0.47677 |
| P68366               | Tubulin alpha-4A chain                                    | TUBA4A         | 1.64E+09  | -0.47505 |
| Q9Y277               | Voltage-dependent anion-selective channel protein 3       | VDAC3          | 745490000 | -0.47182 |
| Q96H79               | Zinc finger CCH-type antiviral protein 1-like             | ZC3HAV1L       | 141760000 | -0.47121 |
| P14635               | G2/mitotic-specific cyclin-B1                             | CCNB1          | 218510000 | -0.46879 |
| P0DP25;P0DP24;P0DP23 |                                                           |                | 2.176E+09 | -0.46858 |
| Q9BYD2               | 39S ribosomal protein L9, mitochondrial                   | MRPL9          | 410630000 | -0.46761 |
| P41091;Q2            | Eukaryotic translation initiation factor 2 subunit 3      | EIF2S3;EIF2S3L | 4.057E+09 | -0.46658 |
| Q9HAS0               | Protein Njmu-R1                                           | C17orf75       | 15689000  | -0.46413 |
| Q9H4L5               | Oxysterol-binding protein-related protein 3               | OSBPL3         | 149510000 | -0.46294 |
| O96019               | Actin-like protein 6A                                     | ACTL6A         | 2.01E+09  | -0.46097 |
| Q9BYN8               | 28S ribosomal protein S26, mitochondrial                  | MRPS26         | 96019000  | -0.46064 |
| P53007               | Tricarboxylate transport protein, mitochondrial           | SLC25A1        | 815120000 | -0.45929 |
| Q92542               | Nicastrin                                                 | NCSTN          | 96031000  | -0.45438 |
| P68363               | Tubulin alpha-1B chain                                    | TUBA1B         | 1.345E+11 | -0.44816 |
| Q9Y6K9               | NF-kappa-B essential modulator                            | IKBKG          | 140310000 | -0.44717 |
| Q9HA64               | Ketosamine-3-kinase                                       | FN3KRP         | 223840000 | -0.44652 |
| P17706               | Tyrosine-protein phosphatase non-receptor type 2          | PTPN2          | 23987000  | -0.44446 |
| P24941               | Cyclin-dependent kinase 2                                 | CDK2           | 720310000 | -0.44112 |
| P62633               | Cellular nucleic acid-binding protein                     | CNBP           | 213870000 | -0.43737 |
| Q9UJA5               | tRNA (adenine(58)-N(1))-methyltransferase non-catalytic   | TRMT6          | 476320000 | -0.43518 |
| O15066               | Kinesin-like protein KIF3B                                | KIF3B          | 61433000  | -0.43497 |
| Q9NUQ7               | Ufm1-specific protease 2                                  | UFSP2          | 210180000 | -0.43419 |
| Q9H9J2               | 39S ribosomal protein L44, mitochondrial                  | MRPL44         | 472510000 | -0.43363 |
| Q13185               | Chromobox protein homolog 3                               | CBX3           | 2.579E+09 | -0.43286 |
| P09543               | 2,3-cyclic-nucleotide 3-phosphodiesterase                 | CNP            | 538610000 | -0.43072 |
| P08579               | U2 small nuclear ribonucleoprotein B                      | SNRNPB         | 277830000 | -0.42826 |
| P29218               | Inositol monophosphatase 1                                | IMPA1          | 176990000 | -0.42763 |

|           |                                                                         |               |           |          |
|-----------|-------------------------------------------------------------------------|---------------|-----------|----------|
| Q7Z406    | Myosin-14                                                               | MYH14         | 1.801E+09 | -0.42667 |
| Q12824    | SWI/SNF-related matrix-associated actin-dependent SMARCB1               | SMARCB1       | 76485000  | -0.42401 |
| Q9P016    | Thymocyte nuclear protein 1                                             | THYN1         | 140960000 | -0.41997 |
| Q05086    | Ubiquitin-protein ligase E3A                                            | UBE3A         | 202570000 | -0.41794 |
| Q8TB61    | Adenosine 3-phospho 5-phosphosulfate transporter                        | SLC35B2       | 71155000  | -0.41322 |
| P55884    | Eukaryotic translation initiation factor 3 subunit B                    | EIF3B         | 8.996E+09 | -0.41148 |
| Q9UBX3    | Mitochondrial dicarboxylate carrier                                     | SLC25A10      | 393440000 | -0.41004 |
| Q9H078    | Caseinolytic peptidase B protein homolog                                | CLPB          | 227110000 | -0.40965 |
| P38919    | Eukaryotic initiation factor 4A-III;Eukaryotic initiation factor 4A-III | EIF4A3        | 2.052E+09 | -0.40936 |
| Q9C0C2    | 182 kDa tankyrase-1-binding protein                                     | TNKS1BP1      | 1.015E+09 | -0.40716 |
| Q96ST2    | Protein IWS1 homolog                                                    | IWS1          | 236920000 | -0.40198 |
| P19105;O1 | Myosin regulatory light chain 12A;Myosin regulatory light chain 12B     | MYL12A;MYL12B | 1.918E+10 | -0.40011 |
| P13498    | Cytochrome b-245 light chain                                            | CYBA          | 70693000  | -0.39721 |
| P41208    | Centrin-2                                                               | CETN2         | 523270000 | -0.39522 |
| P56945    | Breast cancer anti-estrogen resistance protein 1                        | BCAR1         | 104870000 | -0.39383 |
| Q9ULX3    | RNA-binding protein NOB1                                                | NOB1          | 210630000 | -0.38968 |
| P63261    | Actin, cytoplasmic 2;Actin, cytoplasmic 2, N-terminal                   | ACTG1         | 2.255E+11 | -0.38915 |
| Q9UKR5    | Probable ergosterol biosynthetic protein 28                             | C14orf1       | 52223000  | -0.38878 |
| Q9NRX1    | RNA-binding protein PNO1                                                | PNO1          | 227950000 | -0.38495 |
| Q9Y496    | Kinesin-like protein KIF3A                                              | KIF3A         | 304400000 | -0.38368 |
| Q9BRX2    | Protein pelota homolog                                                  | PELO          | 514190000 | -0.37976 |
| O95602    | DNA-directed RNA polymerase I subunit RPA1                              | POLR1A        | 191990000 | -0.37617 |
| Q5HYI8    | Rab-like protein 3                                                      | RABL3         | 147920000 | -0.37608 |
| P61978    | Heterogeneous nuclear ribonucleoprotein K                               | HNRNPK        | 3.646E+10 | -0.3742  |
| P49841    | Glycogen synthase kinase-3 beta                                         | GSK3B         | 358430000 | -0.37259 |
| Q5VTB9    | E3 ubiquitin-protein ligase RNF220                                      | RNF220        | 103990000 | -0.37186 |
| P22695    | Cytochrome b-c1 complex subunit 2, mitochondria                         | UQCRC2        | 5.404E+09 | -0.36949 |
| P14868    | Aspartate--tRNA ligase, cytoplasmic                                     | DARS          | 7.016E+09 | -0.36944 |
| P63165;G2 | Small ubiquitin-related modifier 1;Small ubiquitin-related modifier 1   | SUMO1         | 52007000  | -0.36943 |
| P12236    | ADP/ATP translocase 3;ADP/ATP translocase 3, N-terminal                 | SLC25A6       | 2.428E+09 | -0.36872 |
| P09874    | Poly [ADP-ribose] polymerase 1                                          | PARP1         | 1.171E+10 | -0.36696 |
| P47756    | F-actin-capping protein subunit beta                                    | CAPZB         | 2.577E+09 | -0.36646 |
| Q14839    | Chromodomain-helicase-DNA-binding protein 4                             | CHD4          | 4.387E+09 | -0.36552 |
| P23193    | Transcription elongation factor A protein 1                             | TCEA1         | 634660000 | -0.3655  |
| Q14980    | Nuclear mitotic apparatus protein 1                                     | NUMA1         | 1.067E+09 | -0.3648  |
| Q15370    | Transcription elongation factor B polypeptide 2                         | TCEB2         | 152270000 | -0.36465 |
| P47755    | F-actin-capping protein subunit alpha-2                                 | CAPZA2        | 1.3E+09   | -0.36414 |
| Q9NPL8    | Complex I assembly factor TIMMDC1, mitochondrial                        | TIMMDC1       | 147050000 | -0.3632  |
| O75340    | Programmed cell death protein 6                                         | PDCD6         | 310280000 | -0.36309 |
| Q9Y3E7    | Charged multivesicular body protein 3                                   | CHMP3         | 143890000 | -0.35972 |
| P36873    | Serine/threonine-protein phosphatase PP1-gamma                          | PPP1CC        | 553900000 | -0.35683 |
| Q5JTV8    | Torsin-1A-interacting protein 1                                         | TOR1AIP1      | 331850000 | -0.35588 |
| O95070    | Protein YIF1A                                                           | YIF1A         | 52397000  | -0.35474 |
| O14773    | Tripeptidyl-peptidase 1                                                 | TPP1          | 972960000 | -0.34988 |
| O95139    | NADH dehydrogenase [ubiquinone] 1 beta subcomplex                       | NDUFB6        | 358090000 | -0.34847 |
| Q9BXF6    | Rab11 family-interacting protein 5                                      | RAB11FIP5     | 274350000 | -0.34031 |
| Q99986    | Serine/threonine-protein kinase VRK1                                    | VRK1          | 771730000 | -0.33869 |
| Q13263    | Transcription intermediary factor 1-beta                                | TRIM28        | 9.309E+09 | -0.32866 |
| Q96GA3    | Protein LTV1 homolog                                                    | LTV1          | 260980000 | -0.32781 |
| Q6P1N0    | Coiled-coil and C2 domain-containing protein 1A                         | CC2D1A        | 114160000 | -0.32479 |

|        |                                                            |         |           |          |
|--------|------------------------------------------------------------|---------|-----------|----------|
| P54136 | Arginine--tRNA ligase, cytoplasmic                         | RARS    | 6.552E+09 | -0.32289 |
| Q9NWU5 | 39S ribosomal protein L22, mitochondrial                   | MRPL22  | 155990000 | -0.3206  |
| Q8IURO | Trafficking protein particle complex subunit 5             | TRAPPC5 | 46958000  | -0.3201  |
| Q96DV4 | 39S ribosomal protein L38, mitochondrial                   | MRPL38  | 269710000 | -0.31328 |
| Q8TAF3 | WD repeat-containing protein 48                            | WDR48   | 98615000  | -0.30872 |
| Q9NZ45 | CDGSH iron-sulfur domain-containing protein 1              | CISD1   | 392380000 | -0.30832 |
| Q16630 | Cleavage and polyadenylation specificity factor subunit 6  | CPSF6   | 518040000 | -0.30824 |
| Q9NUQ3 | Gamma-taxilin                                              | TXLNG   | 148000000 | -0.30754 |
| O15372 | Eukaryotic translation initiation factor 3 subunit H       | EIF3H   | 4.246E+09 | -0.29519 |
| Q01844 | RNA-binding protein EWS                                    | EWSR1   | 1.267E+09 | -0.29471 |
| Q9UHX1 | Poly(U)-binding-splicing factor PUF60                      | PUF60   | 3.175E+09 | -0.28963 |
| Q5JWF2 | Guanine nucleotide-binding protein G(s) subunit alpha      | GNAS    | 379450000 | -0.28915 |
| Q9UEY8 | Gamma-adducin                                              | ADD3    | 138000000 | -0.28513 |
| O95347 | Structural maintenance of chromosomes protein 2            | SMC2    | 1.8E+09   | -0.28329 |
| P82933 | 28S ribosomal protein S9, mitochondrial                    | MRPS9   | 666090000 | -0.28245 |
| Q9UH62 | Armadillo repeat-containing X-linked protein 3             | ARMCX3  | 266080000 | -0.27822 |
| Q12874 | Splicing factor 3A subunit 3                               | SF3A3   | 1.8E+09   | -0.2777  |
| Q14192 | Four and a half LIM domains protein 2                      | FHL2    | 73498000  | -0.2767  |
| Q9NUJ1 | Mycophenolic acid acyl-glucuronide esterase, mitochondrial | ABHD10  | 782830000 | -0.2747  |
| Q9UNF1 | Melanoma-associated antigen D2                             | MAGED2  | 970340000 | -0.27326 |
| Q96G46 | tRNA-dihydrouridine(47) synthase [NAD(P)(+)]-like          | DUS3L   | 175510000 | -0.26874 |
| Q15459 | Splicing factor 3A subunit 1                               | SF3A1   | 2.293E+09 | -0.26659 |
| A0FGR8 | Extended synaptotagmin-2                                   | ESYT2   | 407720000 | -0.26483 |
| P46821 | Microtubule-associated protein 1B;MAP1B heavy chain        | MAP1B   | 2.04E+10  | -0.25631 |
| P00918 | Carbonic anhydrase 2                                       | CA2     | 9.259E+09 | -0.25516 |
| O95721 | Synaptosomal-associated protein 29                         | SNAP29  | 121260000 | -0.24988 |
| Q96N67 | Dedicator of cytokinesis protein 7                         | DOCK7   | 578360000 | -0.24949 |
| Q5XKP0 | Protein QIL1                                               | QIL1    | 424740000 | -0.24718 |
| Q15393 | Splicing factor 3B subunit 3                               | SF3B3   | 3.625E+09 | -0.24565 |
| Q86TS9 | 39S ribosomal protein L52, mitochondrial                   | MRPL52  | 230170000 | -0.24554 |
| Q14157 | Ubiquitin-associated protein 2-like                        | UBAP2L  | 1.633E+09 | -0.24388 |
| O75477 | Erlin-1                                                    | ERLIN1  | 811730000 | -0.24367 |
| Q9BUF5 | Tubulin beta-6 chain                                       | TUBB6   | 3.079E+10 | -0.24332 |
| O15344 | E3 ubiquitin-protein ligase Midline-1                      | MID1    | 74837000  | -0.23936 |
| Q99700 | Ataxin-2                                                   | ATXN2   | 77915000  | -0.23861 |
| P82673 | 28S ribosomal protein S35, mitochondrial                   | MRPS35  | 674810000 | -0.23809 |
| Q96GC9 | Vacuole membrane protein 1                                 | VMP1    | 344770000 | -0.2363  |
| P53985 | Monocarboxylate transporter 1                              | SLC16A1 | 289720000 | -0.23519 |
| Q13084 | 39S ribosomal protein L28, mitochondrial                   | MRPL28  | 745430000 | -0.23425 |
| Q8IWZ3 | Ankyrin repeat and KH domain-containing protein 1          | ANKHD1  | 123510000 | -0.2333  |
| P46736 | Lys-63-specific deubiquitinase BRCC36                      | BRCC3   | 102790000 | -0.23215 |
| Q96IJ6 | Mannose-1-phosphate guanyltransferase alpha                | GMPPA   | 440950000 | -0.23113 |
| Q9UFW8 | CGG triplet repeat-binding protein 1                       | CGGBP1  | 96795000  | -0.22964 |
| P50579 | Methionine aminopeptidase 2                                | METAP2  | 378070000 | -0.22838 |
| Q9BVV7 | Mitochondrial import inner membrane translocase            | TIMM21  | 26481000  | -0.22712 |
| Q92820 | Gamma-glutamyl hydrolase                                   | GGH     | 878470000 | -0.22084 |
| Q9Y2D5 | A-kinase anchor protein 2                                  | AKAP2   | 694120000 | -0.21754 |
| O00461 | Golgi integral membrane protein 4                          | GOLIM4  | 80961000  | -0.21697 |
| Q9BRK5 | 45 kDa calcium-binding protein                             | SDF4    | 352710000 | -0.21602 |
| Q8N5M9 | Protein jagunal homolog 1                                  | JAGN1   | 71983000  | -0.21498 |

|           |                                                      |               |           |          |
|-----------|------------------------------------------------------|---------------|-----------|----------|
| Q02978    | Mitochondrial 2-oxoglutarate/malate carrier prote    | SLC25A11      | 1.777E+09 | -0.21309 |
| Q96G23    | Ceramide synthase 2                                  | CERS2         | 404470000 | -0.21112 |
| Q5VTU8;P5 | ATP synthase subunit epsilon-like protein, mitochc   | ATP5EP2;ATP5E | 365130000 | -0.20933 |
| Q15555    | Microtubule-associated protein RP/EB family mem      | MAPRE2        | 558680000 | -0.20833 |
| Q8N4L2    | Type 2 phosphatidylinositol 4,5-bisphosphate 4-ph    | TMEM55A       | 51321000  | -0.20662 |
| Q9UBU8    | Mortality factor 4-like protein 1                    | MORF4L1       | 130700000 | -0.2014  |
| O43674    | NADH dehydrogenase [ubiquinone] 1 beta subcorr       | NDUFB5        | 311020000 | -0.19776 |
| Q9UBS4    | DnaJ homolog subfamily B member 11                   | DNAJB11       | 998410000 | -0.19477 |
| O15371    | Eukaryotic translation initiation factor 3 subunit D | EIF3D         | 4.05E+09  | -0.19464 |
| Q9Y2U8    | Inner nuclear membrane protein Man1                  | LEMD3         | 104580000 | -0.1923  |
| O14925    | Mitochondrial import inner membrane translocase      | TIMM23        | 656790000 | -0.19141 |
| Q9Y295    | Developmentally-regulated GTP-binding protein 1      | DRG1          | 1.812E+09 | -0.19121 |
| P27694    | Replication protein A 70 kDa DNA-binding subunit;    | RPA1          | 3.376E+09 | -0.19041 |
| Q9HC07    | Transmembrane protein 165                            | TMEM165       | 454410000 | -0.18735 |
| Q13459    | Unconventional myosin-IXb                            | MYO9B         | 318310000 | -0.18422 |
| P68371    | Tubulin beta-4B chain                                | TUBB4B        | 3.904E+10 | -0.1773  |
| Q9H270    | Vacuolar protein sorting-associated protein 11 hor   | VPS11         | 201940000 | -0.17484 |
| Q15904    | V-type proton ATPase subunit S1                      | ATP6AP1       | 32518000  | -0.17149 |
| P57088    | Transmembrane protein 33                             | TMEM33        | 652860000 | -0.17082 |
| Q86U44    | N6-adenosine-methyltransferase 70 kDa subunit        | METTL3        | 183640000 | -0.17025 |
| O43809    | Cleavage and polyadenylation specificity factor su   | NUDT21        | 2.069E+09 | -0.17006 |
| Q14558    | Phosphoribosyl pyrophosphate synthase-associate      | PRPSAP1       | 1.089E+09 | -0.16874 |
| Q9NR56    | Muscleblind-like protein 1                           | MBNL1         | 269530000 | -0.16839 |
| P27449    | V-type proton ATPase 16 kDa proteolipid subunit      | ATP6V0C       | 125100000 | -0.16531 |
| Q99575    | Ribonucleases P/MRP protein subunit POP1             | POP1          | 262160000 | -0.16421 |
| P63220    | 40S ribosomal protein S21                            | RPS21         | 1.94E+09  | -0.16272 |
| Q9UI10    | Translation initiation factor eIF-2B subunit delta   | EIF2B4        | 302810000 | -0.16116 |
| Q9NUV7    | Serine palmitoyltransferase 3                        | SPTLC3        | 270800000 | -0.15883 |
| Q01650;Q9 | Large neutral amino acids transporter small subuni   | SLC7A5;SLC7A7 | 76030000  | -0.15828 |
| P16615    | Sarcoplasmic/endoplasmic reticulum calcium ATPa      | ATP2A2        | 5.335E+09 | -0.15706 |
| Q96D46    | 60S ribosomal export protein NMD3                    | NMD3          | 220660000 | -0.15611 |
| Q8ND24    | RING finger protein 214                              | RNF214        | 93484000  | -0.15574 |
| Q6IAN0    | Dehydrogenase/reductase SDR family member 7B         | DHRS7B        | 395880000 | -0.15568 |
| Q8WXX5    | DnaJ homolog subfamily C member 9                    | DNAJC9        | 1.543E+09 | -0.1556  |
| P05141    | ADP/ATP translocase 2;ADP/ATP translocase 2, N-t     | SLC25A5       | 1.874E+10 | -0.15343 |
| P61020    | Ras-related protein Rab-5B                           | RAB5B         | 607700000 | -0.14884 |
| P04049    | RAF proto-oncogene serine/threonine-protein kin      | RAF1          | 56114000  | -0.14656 |
| P16402    | Histone H1.3                                         | HIST1H1D      | 69777000  | -0.14433 |
| O96011    | Peroxisomal membrane protein 11B                     | PEX11B        | 39152000  | -0.1441  |
| P23258;Q9 | Tubulin gamma-1 chain;Tubulin gamma-2 chain          | TUBG1;TUBG2   | 1.538E+09 | -0.14396 |
| P42025    | Beta-centractin                                      | ACTR1B        | 445620000 | -0.13773 |
| Q147X3    | N-alpha-acetyltransferase 30                         | NAA30         | 127810000 | -0.13586 |
| Q96C36    | Proline-5-carboxylate reductase 2                    | PYCR2         | 664190000 | -0.1355  |
| Q9BYC8    | 39S ribosomal protein L32, mitochondrial             | MRPL32        | 128500000 | -0.12824 |
| Q5T653    | 39S ribosomal protein L2, mitochondrial              | MRPL2         | 364650000 | -0.1265  |
| Q32MZ4    | Leucine-rich repeat flightless-interacting protein   | LRRFIP1       | 658090000 | -0.12278 |
| Q13144    | Translation initiation factor eIF-2B subunit epsilon | EIF2B5        | 298330000 | -0.11572 |
| Q5T8P6    | RNA-binding protein 26                               | RBM26         | 349310000 | -0.11497 |
| P14735    | Insulin-degrading enzyme                             | IDE           | 1.558E+09 | -0.11448 |
| Q15019    | Septin-2                                             | Sep-02        | 6.328E+09 | -0.11144 |

|           |                                                                   |         |           |          |
|-----------|-------------------------------------------------------------------|---------|-----------|----------|
| Q2M1P5    | Kinesin-like protein KIF7                                         | KIF7    | 68399000  | -0.11132 |
| Q9Y679    | Ancient ubiquitous protein 1                                      | AUP1    | 331850000 | -0.10753 |
| Q15293    | Reticulocalbin-1                                                  | RCN1    | 5.85E+09  | -0.10718 |
| Q96CW5    | Gamma-tubulin complex component 3                                 | TUBGCP3 | 191260000 | -0.10254 |
| Q6UXN9    | WD repeat-containing protein 82                                   | WDR82   | 200480000 | -0.09981 |
| Q9P015    | 39S ribosomal protein L15, mitochondrial                          | MRPL15  | 368060000 | -0.09978 |
| Q15582    | Transforming growth factor-beta-induced protein iTGFB1            |         | 75583000  | -0.09818 |
| P78362    | SRSF protein kinase 2;SRSF protein kinase 2 N-tern SRPK2          |         | 185520000 | -0.0974  |
| P56556    | NADH dehydrogenase [ubiquinone] 1 alpha subcor NDUFA6             |         | 253750000 | -0.09659 |
| Q9NTJ3    | Structural maintenance of chromosomes protein 4 SMC4              |         | 1.932E+09 | -0.09525 |
| P36915    | Guanine nucleotide-binding protein-like 1                         | GNL1    | 143820000 | -0.09344 |
| Q92979    | Ribosomal RNA small subunit methyltransferase N EMG1              |         | 143800000 | -0.09222 |
| P46977    | Dolichyl-diphosphooligosaccharide--protein glycos STT3A           |         | 640840000 | -0.09073 |
| Q9HCK8;Q  | Chromodomain-helicase-DNA-binding protein 8;Cr CHD8;CHD6;CHD9     |         | 86603000  | -0.0903  |
| P78346    | Ribonuclease P protein subunit p30                                | RPP30   | 652530000 | -0.08745 |
| Q16891    | MICOS complex subunit MIC60                                       | IMMT    | 3.645E+09 | -0.08606 |
| O75821    | Eukaryotic translation initiation factor 3 subunit G              | EIF3G   | 4.885E+09 | -0.08577 |
| O15269    | Serine palmitoyltransferase 1                                     | SPTLC1  | 465650000 | -0.08489 |
| O43795    | Unconventional myosin-Ib                                          | MYO1B   | 974380000 | -0.0823  |
| O95864    | Fatty acid desaturase 2                                           | FADS2   | 8492000   | -0.08123 |
| Q6P9B6    | TLD domain-containing protein 1                                   | TLDC1   | 213800000 | -0.08044 |
| Q9NYK5    | 39S ribosomal protein L39, mitochondrial                          | MRPL39  | 748490000 | -0.08008 |
| P51648    | Fatty aldehyde dehydrogenase                                      | ALDH3A2 | 248660000 | -0.07728 |
| P82909    | 28S ribosomal protein S36, mitochondrial                          | MRPS36  | 146090000 | -0.06803 |
| Q9HCU5    | Prolactin regulatory element-binding protein                      | PREB    | 135310000 | -0.06796 |
| Q8N1F7    | Nuclear pore complex protein Nup93                                | NUP93   | 1.222E+09 | -0.06367 |
| O75382    | Tripartite motif-containing protein 3                             | TRIM3   | 81569000  | -0.06347 |
| Q99442    | Translocation protein SEC62                                       | SEC62   | 63872000  | -0.06152 |
| P08621    | U1 small nuclear ribonucleoprotein 70 kDa                         | SNRNP70 | 1.369E+09 | -0.06142 |
| O94874    | E3 UFM1-protein ligase 1                                          | UFL1    | 733860000 | -0.05902 |
| P51692;P4 | Signal transducer and activator of transcription 5B;STAT5B;STAT5A |         | 128520000 | -0.05645 |
| Q13885    | Tubulin beta-2A chain                                             | TUBB2A  | 104290000 | -0.05624 |
| Q9BQ70    | Transcription factor 25                                           | TCF25   | 107690000 | -0.05373 |
| Q15046    | Lysine--tRNA ligase                                               | KARS    | 3.634E+09 | -0.04742 |
| P23634    | Plasma membrane calcium-transporting ATPase 4                     | ATP2B4  | 206520000 | -0.04732 |
| Q01970    | 1-phosphatidylinositol 4,5-bisphosphate phosphod PLCB3            |         | 507450000 | -0.04338 |
| P28288    | ATP-binding cassette sub-family D member 3                        | ABCD3   | 494610000 | -0.03813 |
| Q14258    | E3 ubiquitin/ISG15 ligase TRIM25                                  | TRIM25  | 1.287E+09 | -0.03727 |
| Q92785    | Zinc finger protein ubi-d4                                        | DPF2    | 176610000 | -0.03661 |
| Q7Z4Q2    | HEAT repeat-containing protein 3                                  | HEATR3  | 238770000 | -0.03413 |
| Q9BYD6    | 39S ribosomal protein L1, mitochondrial                           | MRPL1   | 321840000 | -0.03197 |
| P47897    | Glutamine--tRNA ligase                                            | QARS    | 4.875E+09 | -0.03063 |
| Q99729    | Heterogeneous nuclear ribonucleoprotein A/B                       | HNRNPAB | 2.197E+09 | -0.02694 |
| Q96559    | Ran-binding protein 9                                             | RANBP9  | 189180000 | -0.02523 |
| Q96EY7    | Pentatricopeptide repeat domain-containing prote                  | PTCD3   | 890960000 | -0.02192 |
| Q9BSD7    | Cancer-related nucleoside-triphosphatase                          | NTPCR   | 1.13E+09  | -0.02186 |
| Q2NL82    | Pre-rRNA-processing protein TSR1 homolog                          | TSR1    | 581040000 | -0.02079 |
| P00749    | Urokinase-type plasminogen activator;Urokinase-t                  | PLAU    | 87085000  | -0.02034 |
| P35222    | Catenin beta-1                                                    | CTNNB1  | 640890000 | -0.01968 |
| Q15054    | DNA polymerase delta subunit 3                                    | POLD3   | 181890000 | -0.01876 |

|            |                                                     |                |           |          |
|------------|-----------------------------------------------------|----------------|-----------|----------|
| P62306     | Small nuclear ribonucleoprotein F                   | SNRPF          | 1.225E+09 | -0.01798 |
| Q8TEQ6     | Gem-associated protein 5                            | GEMIN5         | 1.089E+09 | -0.01701 |
| Q9GZT9     | Egl nine homolog 1                                  | EGLN1          | 36589000  | -0.01321 |
| Q9UHR5     | SAP30-binding protein                               | SAP30BP        | 127220000 | -0.0125  |
| O43852     | Calumenin                                           | CALU           | 1.64E+10  | -0.00697 |
| O43399     | Tumor protein D54                                   | TPD52L2        | 3.442E+09 | -0.00442 |
| Q13356     | Peptidyl-prolyl cis-trans isomerase-like 2          | PPIL2          | 95187000  | -0.00298 |
| Q6SZW1     | Sterile alpha and TIR motif-containing protein 1    | SARM1          | 153580000 | -0.00023 |
| P11142     | Heat shock cognate 71 kDa protein                   | HSPA8          | 8.872E+10 | 0        |
| Q9H2H8     | Peptidyl-prolyl cis-trans isomerase-like 3          | PPIL3          | 78558000  | 0.00233  |
| P07814     | Bifunctional glutamate/proline--tRNA ligase;Glutar  | EPRS           | 1.083E+10 | 0.002857 |
| Q9BSJ2     | Gamma-tubulin complex component 2                   | TUBGCP2        | 689920000 | 0.003049 |
| P10599     | Thioredoxin                                         | TXN            | 4.082E+09 | 0.003085 |
| P14678;P6: | Small nuclear ribonucleoprotein-associated protei   | SNRPB;SNRPN    | 485590000 | 0.006971 |
| P06493     | Cyclin-dependent kinase 1                           | CDK1           | 1.724E+09 | 0.008334 |
| P43353;P4: | Aldehyde dehydrogenase family 3 member B1;Alde      | ALDH3B1;ALDH3B | 82997000  | 0.009136 |
| Q9BQ95     | Evolutionarily conserved signaling intermediate in  | ECSIT          | 202390000 | 0.012925 |
| Q9Y399     | 28S ribosomal protein S2, mitochondrial             | MRPS2          | 204230000 | 0.015817 |
| P36021     | Monocarboxylate transporter 8                       | SLC16A2        | 17454000  | 0.016003 |
| Q13586     | Stromal interaction molecule 1                      | STIM1          | 40364000  | 0.017607 |
| P04844     | Dolichyl-diphosphooligosaccharide--protein glycos   | RPN2           | 1.173E+10 | 0.018131 |
| Q9UKL0     | REST corepressor 1                                  | RCOR1          | 109680000 | 0.019727 |
| P55011     | Solute carrier family 12 member 2                   | SLC12A2        | 115700000 | 0.019894 |
| O75533     | Splicing factor 3B subunit 1                        | SF3B1          | 6.509E+09 | 0.020293 |
| O00767     | Acyl-CoA desaturase                                 | SCD            | 593100000 | 0.020936 |
| Q9UBM7     | 7-dehydrocholesterol reductase                      | DHCR7          | 321540000 | 0.023142 |
| O75494     | Serine/arginine-rich splicing factor 10             | SRSF10         | 96612000  | 0.025093 |
| Q96GC5     | 39S ribosomal protein L48, mitochondrial            | MRPL48         | 141880000 | 0.025188 |
| Q9H2D6     | TRIO and F-actin-binding protein                    | TRIOBP         | 490920000 | 0.025741 |
| Q15286     | Ras-related protein Rab-35                          | RAB35          | 185210000 | 0.029778 |
| Q07666     | KH domain-containing, RNA-binding, signal transdu   | KHDRBS1        | 2.969E+09 | 0.03049  |
| Q9UNL2     | Translocon-associated protein subunit gamma         | SSR3           | 710150000 | 0.031257 |
| Q6PJT7     | Zinc finger CCCH domain-containing protein 14       | ZC3H14         | 144210000 | 0.035303 |
| Q52LJ0     | Protein FAM98B                                      | FAM98B         | 714250000 | 0.037091 |
| O95239;Q2  | Chromosome-associated kinesin KIF4A;Chromosom       | KIF4A;KIF4B    | 87682000  | 0.039669 |
| Q92616     | Translational activator GCN1                        | GCN1L1         | 1.004E+10 | 0.043285 |
| Q9Y6W5     | Wiskott-Aldrich syndrome protein family member      | WASF2          | 137170000 | 0.046219 |
| P60468     | Protein transport protein Sec61 subunit beta        | SEC61B         | 699400000 | 0.046722 |
| Q9BZE1     | 39S ribosomal protein L37, mitochondrial            | MRPL37         | 760070000 | 0.049878 |
| Q8IUF8     | Bifunctional lysine-specific demethylase and histid | MINA           | 175780000 | 0.049976 |
| Q2TAY7     | WD40 repeat-containing protein SMU1;WD40 repe       | SMU1           | 236510000 | 0.054667 |
| Q8N6R0     | Methyltransferase-like protein 13                   | METTL13        | 213270000 | 0.056608 |
| Q13162     | Peroxiredoxin-4                                     | PRDX4          | 1.595E+09 | 0.058624 |
| O75607     | Nucleoplasmin-3                                     | NPM3           | 505630000 | 0.059551 |
| O43237     | Cytoplasmic dynein 1 light intermediate chain 2     | DYNC1LI2       | 544630000 | 0.05981  |
| Q8TCG1     | Protein CIP2A                                       | KIAA1524       | 132680000 | 0.061242 |
| P32119     | Peroxiredoxin-2                                     | PRDX2          | 5.967E+09 | 0.06172  |
| Q9BZL4     | Protein phosphatase 1 regulatory subunit 12C        | PPP1R12C       | 31018000  | 0.061768 |
| Q15746     | Myosin light chain kinase, smooth muscle;Myosin I   | MYLK           | 99616000  | 0.063422 |
| Q9NZ01     | Very-long-chain enoyl-CoA reductase                 | TECR           | 758950000 | 0.065268 |

|            |                                                    |                |           |          |
|------------|----------------------------------------------------|----------------|-----------|----------|
| Q8WYA6     | Beta-catenin-like protein 1                        | CTNBL1         | 413770000 | 0.069216 |
| Q96F86     | Enhancer of mRNA-decapping protein 3               | EDC3           | 531400000 | 0.070551 |
| Q96KP1     | Exocyst complex component 2                        | EXOC2          | 366170000 | 0.071916 |
| Q04837     | Single-stranded DNA-binding protein, mitochondri   | SSBP1          | 6.797E+09 | 0.073097 |
| Q14671     | Pumilio homolog 1                                  | PUM1           | 245600000 | 0.073356 |
| P12277     | Creatine kinase B-type                             | CKB            | 4.855E+10 | 0.073786 |
| P82932     | 28S ribosomal protein S6, mitochondrial            | MRPS6          | 105440000 | 0.074689 |
| Q9NYV4     | Cyclin-dependent kinase 12                         | CDK12          | 103350000 | 0.078597 |
| P55042     | GTP-binding protein RAD                            | RRAD           | 73327000  | 0.07981  |
| Q7Z3K3     | Pogo transposable element with ZNF domain          | POGZ           | 25174000  | 0.081103 |
| Q9H2U1     | ATP-dependent RNA helicase DHX36                   | DHX36          | 239660000 | 0.081158 |
| O43598     | 2-deoxynucleoside 5-phosphate N-hydrolase 1        | DNPH1          | 736260000 | 0.0859   |
| Q9HC98;Q&  | Serine/threonine-protein kinase Nek6;Serine/thre   | NEK6;NEK7      | 58343000  | 0.087328 |
| Q15018     | BRISC complex subunit Abro1                        | FAM175B        | 181620000 | 0.092177 |
| P46934     | E3 ubiquitin-protein ligase NEDD4                  | NEDD4          | 300400000 | 0.093327 |
| Q9UN37     | Vacuolar protein sorting-associated protein 4A     | VPS4A          | 267460000 | 0.094823 |
| Q9Y6N5     | Sulfide:quinone oxidoreductase, mitochondrial      | SQRDL          | 2.501E+09 | 0.097632 |
| Q12981     | Vesicle transport protein SEC20                    | BNIP1          | 88523000  | 0.098091 |
| Q7LGA3     | Heparan sulfate 2-O-sulfotransferase 1             | HS2ST1         | 61930000  | 0.100614 |
| Q9NSC5     | Homer protein homolog 3                            | HOMER3         | 152230000 | 0.101184 |
| P23508     | Colorectal mutant cancer protein                   | MCC            | 57362000  | 0.10466  |
| Q86TG7     | Retrotransposon-derived protein PEG10              | PEG10          | 34584000  | 0.104667 |
| Q9Y291     | 28S ribosomal protein S33, mitochondrial           | MRPS33         | 59758000  | 0.105191 |
| Q96LI5;Q9I | CCR4-NOT transcription complex subunit 6-like;CC   | CNOT6L;CNOT6   | 44087000  | 0.106467 |
| Q8IZH2     | 5-3 exoribonuclease 1                              | XRN1           | 53576000  | 0.112908 |
| Q969S3     | Zinc finger protein 622                            | ZNF622         | 258970000 | 0.113459 |
| Q13049     | E3 ubiquitin-protein ligase TRIM32                 | TRIM32         | 76439000  | 0.115384 |
| Q96EC8     | Protein YIPF6                                      | YIPF6          | 63437000  | 0.11593  |
| Q8NEZ5     | F-box only protein 22                              | FBXO22         | 289590000 | 0.117603 |
| Q12905     | Interleukin enhancer-binding factor 2              | ILF2           | 5.884E+09 | 0.120179 |
| Q9BTE7     | DCN1-like protein 5                                | DCUN1D5        | 372960000 | 0.121789 |
| Q53GQ0     | Very-long-chain 3-oxoacyl-CoA reductase            | HSD17B12       | 2.059E+09 | 0.123177 |
| O00483     | Cytochrome c oxidase subunit NDUFA4                | NDUFA4         | 91204000  | 0.125049 |
| Q9P1Y5     | Calmodulin-regulated spectrin-associated protein : | CAMSAP3        | 49137000  | 0.126841 |
| Q13155     | Aminoacyl tRNA synthase complex-interacting mul    | AIMP2          | 1.591E+09 | 0.12704  |
| O14497     | AT-rich interactive domain-containing protein 1A   | ARID1A         | 86199000  | 0.128558 |
| Q12756     | Kinesin-like protein KIF1A                         | KIF1A          | 282290000 | 0.133131 |
| P68871;P0: | Hemoglobin subunit beta;LVV-hemorphin-7;Spinor     | HBB;HBD        | 18981000  | 0.134804 |
| Q12789     | General transcription factor 3C polypeptide 1      | GTF3C1         | 162440000 | 0.13496  |
| Q86XP3     | ATP-dependent RNA helicase DDX42                   | DDX42          | 1.464E+09 | 0.14033  |
| Q9NR50     | Translation initiation factor eIF-2B subunit gamma | EIF2B3         | 364450000 | 0.140664 |
| P56962     | Syntaxin-17                                        | STX17          | 39232000  | 0.141    |
| O75165     | DnaJ homolog subfamily C member 13                 | DNAJC13        | 2.56E+09  | 0.14288  |
| Q8WXI9     | Transcriptional repressor p66-beta                 | GATAD2B        | 146720000 | 0.144185 |
| O95168     | NADH dehydrogenase [ubiquinone] 1 beta subcorr     | NDUFB4         | 276960000 | 0.145091 |
| Q9NWB7     | Intraflagellar transport protein 57 homolog        | IFT57          | 66833000  | 0.145289 |
| Q9BRT8;Q&  | COBW domain-containing protein 1;COBW domair       | CBWD1;CBWD2;CI | 68803000  | 0.147882 |
| Q8WUY1     | Protein THEM6                                      | THEM6          | 69957000  | 0.148491 |
| Q1KMD3     | Heterogeneous nuclear ribonucleoprotein U-like p   | HNRNPUL2       | 498660000 | 0.148845 |
| Q9H7D0     | Dedicator of cytokinesis protein 5                 | DOCK5          | 104290000 | 0.151901 |



|           |                                                       |           |           |          |
|-----------|-------------------------------------------------------|-----------|-----------|----------|
| P62140    | Serine/threonine-protein phosphatase PP1-beta cα      | PPP1CB    | 539550000 | 0.153922 |
| O60669    | Monocarboxylate transporter 2                         | SLC16A7   | 12676000  | 0.155496 |
| P61964    | WD repeat-containing protein 5                        | WDR5      | 146660000 | 0.156039 |
| O15084    | Serine/threonine-protein phosphatase 6 regulator      | ANKRD28   | 23705000  | 0.157478 |
| O43324    | Eukaryotic translation elongation factor 1 epsilon-1  | EEF1E1    | 1.38E+09  | 0.158776 |
| P41252    | Isoleucine--tRNA ligase, cytoplasmic                  | IARS      | 9.194E+09 | 0.15988  |
| Q969M3    | Protein YIPF5                                         | YIPF5     | 86174000  | 0.163277 |
| P13987    | CD59 glycoprotein                                     | CD59      | 24812000  | 0.163289 |
| Q9NVE7    | Pantothenate kinase 4                                 | PANK4     | 73476000  | 0.163877 |
| Q86UP2    | Kinectin                                              | KTN1      | 6.198E+09 | 0.166898 |
| Q5VTL8    | Pre-mRNA-splicing factor 38B                          | PRPF38B   | 71214000  | 0.169238 |
| O95249    | Golgi SNAP receptor complex member 1                  | GOSR1     | 366040000 | 0.170561 |
| Q96A72    | Protein mago nashi homolog 2                          | MAGOHB    | 1.025E+09 | 0.171117 |
| P13716    | Delta-aminolevulinic acid dehydratase                 | ALAD      | 96300000  | 0.174083 |
| Q9Y4W2    | Ribosomal biogenesis protein LAS1L                    | LAS1L     | 181270000 | 0.175946 |
| Q92643    | GPI-anchor transamidase                               | PIGK      | 100510000 | 0.179343 |
| Q9Y5U2    | Protein TSSC4                                         | TSSC4     | 39786000  | 0.183058 |
| P20290    | Transcription factor BTF3                             | BTF3      | 5.331E+09 | 0.183835 |
| Q9Y625;O7 | Glypican-6;Secreted glypican-6;Glypican-4;Secreted    | GPC6;GPC4 | 111070000 | 0.184365 |
| Q9BV36    | Melanophilin                                          | MLPH      | 629360000 | 0.184494 |
| Q9NX63    | MICOS complex subunit MIC19                           | CHCHD3    | 630570000 | 0.184705 |
| Q12979    | Active breakpoint cluster region-related protein      | ABR       | 887870000 | 0.190289 |
| Q8NBM4    | Ubiquitin-associated domain-containing protein 2      | UBAC2     | 22016000  | 0.190982 |
| Q9BUN8    | Derlin-1                                              | DERL1     | 180430000 | 0.192277 |
| O43414    | ERI1 exoribonuclease 3                                | ERI3      | 10591000  | 0.19241  |
| Q9HD26    | Golgi-associated PDZ and coiled-coil motif-containing | GOPC      | 143850000 | 0.194185 |
| P43307    | Translocon-associated protein subunit alpha           | SSR1      | 1.518E+09 | 0.194638 |
| Q8TAQ2    | SWI/SNF complex subunit SMARCC2                       | SMARCC2   | 839300000 | 0.194916 |
| Q86TB9    | Protein PAT1 homolog 1                                | PATL1     | 293090000 | 0.196749 |
| P24844    | Myosin regulatory light polypeptide 9                 | MYL9      | 36577000  | 0.201995 |
| Q8N5C6    | S1 RNA-binding domain-containing protein 1            | SRBD1     | 49191000  | 0.205099 |
| Q7Z3U7    | Protein MON2 homolog                                  | MON2      | 178990000 | 0.209932 |
| Q9BTC0    | Death-inducer obliterator 1                           | DIDO1     | 245970000 | 0.210127 |
| Q9P0M9    | 39S ribosomal protein L27, mitochondrial              | MRPL27    | 76636000  | 0.211203 |
| Q9NUQ2    | 1-acyl-sn-glycerol-3-phosphate acyltransferase eps    | AGPAT5    | 21099000  | 0.214405 |
| Q9NQ29    | Putative RNA-binding protein Luc7-like 1              | LUC7L     | 20704000  | 0.218476 |
| O94842    | TOX high mobility group box family member 4           | TOX4      | 72030000  | 0.223874 |
| Q15796    | Mothers against decapentaplegic homolog 2             | SMAD2     | 56231000  | 0.226352 |
| Q8TCC3    | 39S ribosomal protein L30, mitochondrial              | MRPL30    | 79109000  | 0.226918 |
| O43491    | Band 4.1-like protein 2                               | EPB41L2   | 1.451E+09 | 0.231699 |
| Q8NI27    | THO complex subunit 2                                 | THOC2     | 352960000 | 0.231814 |
| Q8WUD4    | Coiled-coil domain-containing protein 12              | CCDC12    | 31613000  | 0.232056 |
| P11233    | Ras-related protein Ral-A                             | RALA      | 165820000 | 0.234069 |
| Q9BYC9    | 39S ribosomal protein L20, mitochondrial              | MRPL20    | 93487000  | 0.234375 |
| P55196    | Afadin                                                | MLLT4     | 229250000 | 0.23639  |
| Q9BWF3    | RNA-binding protein 4                                 | RBM4      | 671560000 | 0.236834 |
| O75643    | U5 small nuclear ribonucleoprotein 200 kDa helica     | SNRNP200  | 5.588E+09 | 0.239924 |
| Q9Y5B9    | FACT complex subunit SPT16                            | SUPT16H   | 2.262E+09 | 0.243462 |
| P35914    | Hydroxymethylglutaryl-CoA lyase, mitochondrial        | HMGCL     | 164320000 | 0.243716 |
| P52907    | F-actin-capping protein subunit alpha-1               | CAPZA1    | 5.323E+09 | 0.244085 |

|           |                                                     |            |           |          |
|-----------|-----------------------------------------------------|------------|-----------|----------|
| P26368    | Splicing factor U2AF 65 kDa subunit                 | U2AF2      | 3.977E+09 | 0.245679 |
| Q8WU90    | Zinc finger CCCH domain-containing protein 15       | ZC3H15     | 723550000 | 0.246748 |
| P06753    | Tropomyosin alpha-3 chain                           | TPM3       | 2.414E+09 | 0.246939 |
| Q12800;Q9 | Alpha-globin transcription factor CP2;Upstream-bi   | TFCP2;UBP1 | 73841000  | 0.247211 |
| P51398    | 28S ribosomal protein S29, mitochondrial            | DAP3       | 1.006E+09 | 0.248893 |
| Q16666    | Gamma-interferon-inducible protein 16               | IFI16      | 1.562E+09 | 0.251305 |
| Q05519    | Serine/arginine-rich splicing factor 11             | SRSF11     | 971000000 | 0.251311 |
| P62304    | Small nuclear ribonucleoprotein E                   | SNRPE      | 3.29E+09  | 0.255697 |
| Q7Z7F7    | 39S ribosomal protein L55, mitochondrial            | MRPL55     | 204160000 | 0.256493 |
| P39880    | Homeobox protein cut-like 1                         | CUX1       | 51484000  | 0.256583 |
| O75122    | CLIP-associating protein 2                          | CLASP2     | 418420000 | 0.257143 |
| Q9H0E2    | Toll-interacting protein                            | TOLLIP     | 92495000  | 0.261523 |
| Q53GS9    | U4/U6.U5 tri-snRNP-associated protein 2             | USP39      | 533050000 | 0.266017 |
| P35659    | Protein DEK                                         | DEK        | 600070000 | 0.266057 |
| P36957    | Dihydrolipoyllysine-residue succinyltransferase cor | DLST       | 3.121E+09 | 0.267433 |
| P62249    | 40S ribosomal protein S16                           | RPS16      | 1.055E+10 | 0.279927 |
| Q658P3    | Metalloreductase STEAP3                             | STEAP3     | 647670000 | 0.280145 |
| Q13045    | Protein flightless-1 homolog                        | FLII       | 1.09E+09  | 0.283    |
| Q8WTS6    | Histone-lysine N-methyltransferase SETD7            | SETD7      | 255440000 | 0.284154 |
| Q96A35    | 39S ribosomal protein L24, mitochondrial            | MRPL24     | 644630000 | 0.287971 |
| O14578    | Citron Rho-interacting kinase                       | CIT        | 226400000 | 0.297284 |
| Q15629    | Translocating chain-associated membrane protein     | TRAM1      | 244500000 | 0.300428 |
| Q9BWU0    | Kanadaplin                                          | SLC4A1AP   | 292880000 | 0.301303 |
| Q9BY43    | Charged multivesicular body protein 4a              | CHMP4A     | 162390000 | 0.303621 |
| Q13435    | Splicing factor 3B subunit 2                        | SF3B2      | 4.647E+09 | 0.318682 |
| Q15070    | Mitochondrial inner membrane protein OXA1L          | OXA1L      | 134400000 | 0.318851 |
| Q96GM8    | Target of EGR1 protein 1                            | TOE1       | 29653000  | 0.32192  |
| Q9Y265    | RuvB-like 1                                         | RUVBL1     | 7.703E+09 | 0.323251 |
| Q9BQE3    | Tubulin alpha-1C chain                              | TUBA1C     | 765790000 | 0.325477 |
| O75486    | Transcription initiation protein SPT3 homolog       | SUPT3H     | 16037000  | 0.32557  |
| Q13595    | Transformer-2 protein homolog alpha                 | TRA2A      | 142960000 | 0.325753 |
| Q8N684    | Cleavage and polyadenylation specificity factor suk | CPSF7      | 288720000 | 0.326753 |
| Q13501    | Sequestosome-1                                      | SQSTM1     | 3.799E+09 | 0.332934 |
| O75746    | Calcium-binding mitochondrial carrier protein Aral  | SLC25A12   | 1.77E+09  | 0.333362 |
| Q9Y5T5    | Ubiquitin carboxyl-terminal hydrolase 16            | USP16      | 45672000  | 0.335264 |
| Q8IY17    | Neuropathy target esterase                          | PNPLA6     | 444200000 | 0.337238 |
| Q8NI35    | InaD-like protein                                   | INADL      | 726730000 | 0.338355 |
| O43505    | Beta-1,4-glucuronyltransferase 1                    | B4GAT1     | 86443000  | 0.340936 |
| Q8N1F8    | Serine/threonine-protein kinase 11-interacting prc  | STK11IP    | 2.756E+09 | 0.341304 |
| P35250    | Replication factor C subunit 2                      | RFC2       | 729740000 | 0.343155 |
| Q9NR12    | PDZ and LIM domain protein 7                        | PDLIM7     | 485970000 | 0.344966 |
| Q15648    | Mediator of RNA polymerase II transcription subur   | MED1       | 88365000  | 0.346093 |
| Q9Y3D3    | 28S ribosomal protein S16, mitochondrial            | MRPS16     | 159440000 | 0.350861 |
| Q03001    | Dystonin                                            | DST        | 1.18E+09  | 0.35171  |
| Q96DG6    | Carboxymethylenebutenolidase homolog                | CMBL       | 197870000 | 0.353102 |
| Q08AM6    | Protein VAC14 homolog                               | VAC14      | 716810000 | 0.355408 |
| P19388    | DNA-directed RNA polymerases I, II, and III subunit | POLR2E     | 430560000 | 0.355735 |
| Q9BRZ2    | E3 ubiquitin-protein ligase TRIM56                  | TRIM56     | 72639000  | 0.356588 |
| Q8TB03    | Uncharacterized protein CXorf38                     | CXorf38    | 99978000  | 0.357336 |
| P49959    | Double-strand break repair protein MRE11A           | MRE11A     | 694270000 | 0.357764 |

|        |                                                             |         |           |          |
|--------|-------------------------------------------------------------|---------|-----------|----------|
| O14545 | TRAF-type zinc finger domain-containing protein 1           | TRAFD1  | 14469000  | 0.357862 |
| Q9UJ83 | 2-hydroxyacyl-CoA lyase 1                                   | HACL1   | 54762000  | 0.363213 |
| P26599 | Polypyrimidine tract-binding protein 1                      | PTBP1   | 1.549E+10 | 0.364957 |
| P26196 | Probable ATP-dependent RNA helicase DDX6                    | DDX6    | 2.696E+09 | 0.365619 |
| Q96KR1 | Zinc finger RNA-binding protein                             | ZFR     | 252560000 | 0.366941 |
| Q13523 | Serine/threonine-protein kinase PRP4 homolog                | PRPF4B  | 96229000  | 0.369045 |
| Q96EI5 | Transcription elongation factor A protein-like 4            | TCEAL4  | 43185000  | 0.372403 |
| Q92552 | 28S ribosomal protein S27, mitochondrial                    | MRPS27  | 980460000 | 0.373155 |
| P62081 | 40S ribosomal protein S7                                    | RPS7    | 2.549E+10 | 0.374186 |
| O43264 | Centromere/kinetochore protein zw10 homolog                 | ZW10    | 993530000 | 0.378832 |
| Q8NC51 | Plasminogen activator inhibitor 1 RNA-binding protein       | SERBP1  | 5.04E+09  | 0.378841 |
| Q9UK59 | Lariat debranching enzyme                                   | DBR1    | 36208000  | 0.381307 |
| O14949 | Cytochrome b-c1 complex subunit 8                           | UQCRCQ  | 268150000 | 0.381906 |
| Q9UKA4 | A-kinase anchor protein 11                                  | AKAP11  | 115130000 | 0.387516 |
| Q13561 | Dynactin subunit 2                                          | DCTN2   | 576820000 | 0.39474  |
| Q8WUM9 | Sodium-dependent phosphate transporter 1                    | SLC20A1 | 84448000  | 0.394794 |
| O75439 | Mitochondrial-processing peptidase subunit beta             | PMPCB   | 1.34E+09  | 0.395445 |
| P23396 | 40S ribosomal protein S3                                    | RPS3    | 1.483E+10 | 0.397245 |
| Q9GZL7 | Ribosome biogenesis protein WDR12                           | WDR12   | 158700000 | 0.402704 |
| Q9BRP8 | Partner of Y14 and mago                                     | WIBG    | 192860000 | 0.404227 |
| P42345 | Serine/threonine-protein kinase mTOR                        | MTOR    | 387280000 | 0.411472 |
| O60828 | Polyglutamine-binding protein 1                             | PQBP1   | 199540000 | 0.413086 |
| Q53EU6 | Glycerol-3-phosphate acyltransferase 3                      | AGPAT9  | 729180000 | 0.414685 |
| Q08379 | Golgin subfamily A member 2                                 | GOLGA2  | 684240000 | 0.415704 |
| Q9UMS4 | Pre-mRNA-processing factor 19                               | PRPF19  | 2.471E+09 | 0.417389 |
| P35251 | Replication factor C subunit 1                              | RFC1    | 269590000 | 0.420183 |
| Q92925 | SWI/SNF-related matrix-associated actin-dependent           | SMARCD2 | 24662000  | 0.420615 |
| Q9Y2Q9 | 28S ribosomal protein S28, mitochondrial                    | MRPS28  | 208530000 | 0.423718 |
| O75691 | Small subunit processome component 20 homolog               | UTP20   | 62189000  | 0.424195 |
| Q9Y676 | 28S ribosomal protein S18b, mitochondrial                   | MRPS18B | 273460000 | 0.425345 |
| Q9NP92 | 28S ribosomal protein S30, mitochondrial                    | MRPS30  | 207890000 | 0.42805  |
| P15880 | 40S ribosomal protein S2                                    | RPS2    | 1.087E+10 | 0.430681 |
| P07339 | Cathepsin D;Cathepsin D light chain;Cathepsin D heavy chain | CTSD    | 4.752E+09 | 0.433022 |
| Q5SSJ5 | Heterochromatin protein 1-binding protein 3                 | HP1BP3  | 651250000 | 0.438024 |
| P82664 | 28S ribosomal protein S10, mitochondrial                    | MRPS10  | 251960000 | 0.442191 |
| O94766 | Galactosylgalactosylxylosylprotein 3-beta-glucuronidase     | B3GAT3  | 190410000 | 0.448316 |
| Q9COD9 | Ethanolaminephosphotransferase 1                            | EPT1    | 210790000 | 0.449317 |
| P20585 | DNA mismatch repair protein Msh3                            | MSH3    | 31075000  | 0.451741 |
| Q13112 | Chromatin assembly factor 1 subunit B                       | CHAF1B  | 53953000  | 0.453537 |
| Q14739 | Lamin-B receptor                                            | LBR     | 2.02E+09  | 0.454597 |
| B3EWF7 | Laforin, isoform 9                                          | EPM2A   | 14314000  | 0.454599 |
| P10909 | Clusterin;Clusterin beta chain;Clusterin alpha chain        | CLU     | 188040000 | 0.458427 |
| Q96DI7 | U5 small nuclear ribonucleoprotein 40 kDa protein           | SNRNP40 | 88232000  | 0.458902 |
| Q8TED0 | U3 small nucleolar RNA-associated protein 15 homolog        | UTP15   | 11922000  | 0.461288 |
| Q6P6C2 | RNA demethylase ALKBH5                                      | ALKBH5  | 160360000 | 0.46913  |
| Q96SB4 | SRSF protein kinase 1                                       | SRPK1   | 330160000 | 0.46921  |
| Q92665 | 28S ribosomal protein S31, mitochondrial                    | MRPS31  | 651400000 | 0.471328 |
| Q8N163 | Cell cycle and apoptosis regulator protein 2                | CCAR2   | 2.375E+09 | 0.471855 |
| Q9BZF9 | Uveal autoantigen with coiled-coil domains and an UACA      |         | 83085000  | 0.471965 |
| O43143 | Pre-mRNA-splicing factor ATP-dependent RNA helicase         | DHX15   | 3.198E+09 | 0.474758 |

|               |                                                                     |                   |           |          |
|---------------|---------------------------------------------------------------------|-------------------|-----------|----------|
| Q9UJF2        | Ras GTPase-activating protein nGAP                                  | RASAL2            | 198810000 | 0.475227 |
| Q9H000        | Probable E3 ubiquitin-protein ligase makorin-2                      | MKRN2             | 142670000 | 0.478487 |
| Q9H5Q4        | Dimethyladenosine transferase 2, mitochondrial                      | TFB2M             | 90429000  | 0.483828 |
| Q9NU22        | Midasin                                                             | MDN1              | 295710000 | 0.484875 |
| Q02127        | Dihydroorotate dehydrogenase (quinone), mitochondrial               | DHODH             | 38520000  | 0.485244 |
| P02751        | Fibronectin;Anastellin;Ugl-Y1;Ugl-Y2;Ugl-Y3                         | FN1               | 206490000 | 0.487964 |
| Q86U38        | Nucleolar protein 9                                                 | NOP9              | 303900000 | 0.488936 |
| P62753        | 40S ribosomal protein S6                                            | RPS6              | 6.378E+09 | 0.491069 |
| P84090        | Enhancer of rudimentary homolog                                     | ERH               | 87359000  | 0.493792 |
| P11387        | DNA topoisomerase 1                                                 | TOP1              | 1.214E+09 | 0.493837 |
| P17480        | Nucleolar transcription factor 1                                    | UBTF              | 100980000 | 0.493974 |
| Q96CU9        | FAD-dependent oxidoreductase domain-containing                      | FOXRED1           | 22429000  | 0.495761 |
| Q96SZ5        | 2-aminoethanethiol dioxygenase                                      | ADO               | 35825000  | 0.497511 |
| P04150        | Glucocorticoid receptor                                             | NR3C1             | 71182000  | 0.499385 |
| Q5T1M5        | FK506-binding protein 15                                            | FKBP15            | 279200000 | 0.499802 |
| O94905        | Erlin-2                                                             | ERLIN2            | 2.405E+09 | 0.501336 |
| Q08170        | Serine/arginine-rich splicing factor 4                              | SRSF4             | 228970000 | 0.501349 |
| Q92900        | Regulator of nonsense transcripts 1                                 | UPF1              | 2.714E+09 | 0.502688 |
| Q13724        | Mannosyl-oligosaccharide glucosidase                                | MOGS              | 886930000 | 0.502916 |
| Q7Z4V5        | Hepatoma-derived growth factor-related protein 2                    | HDGFRP2           | 390340000 | 0.508452 |
| O43813        | LanC-like protein 1                                                 | LANCL1            | 89273000  | 0.5089   |
| Q9Y315        | Deoxyribose-phosphate aldolase                                      | DERA              | 383270000 | 0.509454 |
| P40818        | Ubiquitin carboxyl-terminal hydrolase 8                             | USP8              | 36611000  | 0.509507 |
| Q14011        | Cold-inducible RNA-binding protein                                  | CIRBP             | 1.075E+09 | 0.511253 |
| P49848        | Transcription initiation factor TFIID subunit 6                     | TAF6              | 20345000  | 0.512052 |
| Q9H0V9        | VIP36-like protein                                                  | LMAN2L            | 149210000 | 0.514992 |
| Q9NZN8        | CCR4-NOT transcription complex subunit 2                            | CNOT2             | 149450000 | 0.515778 |
| P09661        | U2 small nuclear ribonucleoprotein A                                | SNRPA1            | 1.092E+09 | 0.515932 |
| P48681        | Nestin                                                              | NES               | 96651000  | 0.520091 |
| P62318        | Small nuclear ribonucleoprotein Sm D3                               | SNRPD3            | 2.324E+09 | 0.520425 |
| O60716        | Catenin delta-1                                                     | CTNND1            | 1.439E+09 | 0.52625  |
| Q7L2J0        | 7SK snRNA methylphosphate capping enzyme                            | MEPCE             | 209190000 | 0.527703 |
| Q9BVG9        | Phosphatidylserine synthase 2                                       | PTDSS2            | 35507000  | 0.530974 |
| Q9Y3D9        | 28S ribosomal protein S23, mitochondrial                            | MRPS23            | 601650000 | 0.536876 |
| Q9NRZ9        | Lymphoid-specific helicase                                          | HELLS             | 107640000 | 0.537506 |
| Q6P2Q9        | Pre-mRNA-processing-splicing factor 8                               | PRPF8             | 5.404E+09 | 0.538299 |
| Q5K651        | Sterile alpha motif domain-containing protein 9                     | SAMD9             | 74682000  | 0.545288 |
| P49458        | Signal recognition particle 9 kDa protein                           | SRP9              | 568690000 | 0.547339 |
| Q14161        | ARF GTPase-activating protein GIT2                                  | GIT2              | 220850000 | 0.548603 |
| O14654        | Insulin receptor substrate 4                                        | IRS4              | 504230000 | 0.549058 |
| Q96JB2        | Conserved oligomeric Golgi complex subunit 3                        | COG3              | 180810000 | 0.550232 |
| Q9NQ74        | Exosome complex component RRP46                                     | EXOSC5            | 93830000  | 0.551923 |
| P52701        | DNA mismatch repair protein Msh6                                    | MSH6              | 883280000 | 0.552186 |
| Q27J81        | Inverted formin-2                                                   | INF2              | 4.077E+09 | 0.552291 |
| P62847        | 40S ribosomal protein S24                                           | RPS24             | 5.757E+09 | 0.552971 |
| Q9NVC6        | Mediator of RNA polymerase II transcription subunit 1               | MED17             | 35183000  | 0.554574 |
| Q9GZR7        | ATP-dependent RNA helicase DDX24                                    | DDX24             | 299840000 | 0.555225 |
| O60762        | Dolichol-phosphate mannosyltransferase subunit 1                    | DPM1              | 1.27E+09  | 0.555457 |
| O14965        | Aurora kinase A                                                     | AURKA             | 53900000  | 0.559478 |
| Q9H936;Q9H937 | Mitochondrial glutamate carrier 1;Mitochondrial glutamate carrier 2 | SLC25A22;SLC25A23 | 340620000 | 0.562175 |

|           |                                                      |                |           |          |
|-----------|------------------------------------------------------|----------------|-----------|----------|
| O00541    | Pescadillo homolog                                   | PES1           | 364750000 | 0.562798 |
| Q9P2E9    | Ribosome-binding protein 1                           | RRBP1          | 3.145E+09 | 0.568883 |
| Q96K37    | Solute carrier family 35 member E1                   | SLC35E1        | 109410000 | 0.570864 |
| O94854    | Uncharacterized protein KIAA0754                     | KIAA0754       | 44935000  | 0.571017 |
| P46783    | 40S ribosomal protein S10                            | RPS10          | 1.126E+10 | 0.573355 |
| P17066    | Heat shock 70 kDa protein 6                          | HSPA6          | 4.967E+09 | 0.574245 |
| Q00839    | Heterogeneous nuclear ribonucleoprotein U            | HNRNPU         | 1.122E+10 | 0.580217 |
| O76071    | Probable cytosolic iron-sulfur protein assembly proc | CIAO1          | 116490000 | 0.580593 |
| Q71RC2    | La-related protein 4                                 | LARP4          | 345160000 | 0.580754 |
| Q96PY5    | Formin-like protein 2                                | FMNL2          | 148860000 | 0.584086 |
| P09234    | U1 small nuclear ribonucleoprotein C                 | SNRPC          | 154140000 | 0.58494  |
| Q96QC0    | Serine/threonine-protein phosphatase 1 regulator     | PPP1R10        | 132450000 | 0.586143 |
| Q02880    | DNA topoisomerase 2-beta                             | TOP2B          | 59563000  | 0.587101 |
| Q8WZ42    | Titin                                                | TTN            | 120700000 | 0.59588  |
| P23434    | Glycine cleavage system H protein, mitochondrial     | GCSH           | 236380000 | 0.599168 |
| Q9BV38    | WD repeat-containing protein 18                      | WDR18          | 160910000 | 0.599572 |
| A8MXV4    | Nucleoside diphosphate-linked moiety X motif 19,     | NUDT19         | 144700000 | 0.60625  |
| P49773    | Histidine triad nucleotide-binding protein 1         | HINT1          | 183660000 | 0.606921 |
| O94832    | Unconventional myosin-Id                             | MYO1D          | 78182000  | 0.608515 |
| Q6NUQ4    | Transmembrane protein 214                            | TMEM214        | 72558000  | 0.611468 |
| O15042    | U2 snRNP-associated SURP motif-containing prote      | U2SURP         | 1.388E+09 | 0.612681 |
| Q16637    | Survival motor neuron protein                        | SMN1           | 505760000 | 0.612939 |
| P22830    | Ferrochelatase, mitochondrial                        | FECH           | 120800000 | 0.614861 |
| P08708    | 40S ribosomal protein S17                            | RPS17          | 8.64E+09  | 0.616781 |
| E9PAV3    | Nascent polypeptide-associated complex subunit a     | NACA           | 5.279E+09 | 0.617465 |
| Q9BVA1    | Tubulin beta-2B chain                                | TUBB2B         | 436410000 | 0.619044 |
| Q8IXM3    | 39S ribosomal protein L41, mitochondrial             | MRPL41         | 544360000 | 0.621081 |
| Q9BU23    | Lipase maturation factor 2                           | LMF2           | 189310000 | 0.626637 |
| Q9BX40    | Protein LSM14 homolog B                              | LSM14B         | 204730000 | 0.631238 |
| Q96I24    | Far upstream element-binding protein 3               | FUBP3          | 1.418E+09 | 0.631296 |
| P62701    | 40S ribosomal protein S4, X isoform                  | RPS4X          | 7.362E+09 | 0.635856 |
| Q9BTA9    | WW domain-containing adapter protein with coile      | WAC            | 68332000  | 0.63595  |
| P47813;O1 | Eukaryotic translation initiation factor 1A, X-chrom | EIF1AX;EIF1AY  | 1.048E+09 | 0.641371 |
| O95816    | BAG family molecular chaperone regulator 2           | BAG2           | 1.215E+09 | 0.64889  |
| Q16540    | 39S ribosomal protein L23, mitochondrial             | MRPL23         | 165100000 | 0.652331 |
| Q9UNS1    | Protein timeless homolog                             | TIMELESS       | 24792000  | 0.652984 |
| P57678    | Gem-associated protein 4                             | GEMIN4         | 198180000 | 0.655112 |
| Q9P0V3    | SH3 domain-binding protein 4                         | SH3BP4         | 31698000  | 0.658916 |
| Q9Y3B4    | Splicing factor 3B subunit 6                         | SF3B6          | 1.1E+09   | 0.66213  |
| A5YKK6    | CCR4-NOT transcription complex subunit 1             | CNOT1          | 1.282E+09 | 0.664484 |
| Q14956    | Transmembrane glycoprotein NMB                       | GPNMB          | 301740000 | 0.666107 |
| O95819    | Mitogen-activated protein kinase kinase kinase kin   | MAP4K4         | 402610000 | 0.667438 |
| P45973    | Chromobox protein homolog 5                          | CBX5           | 167090000 | 0.66934  |
| Q7Z478    | ATP-dependent RNA helicase DHX29                     | DHX29          | 496930000 | 0.669789 |
| Q9NXW2    | DnaJ homolog subfamily B member 12                   | DNAJB12        | 86619000  | 0.671577 |
| Q9BQ67    | Glutamate-rich WD repeat-containing protein 1        | GRWD1          | 683310000 | 0.671712 |
| Q15025    | TNFAIP3-interacting protein 1                        | TNIP1          | 25808000  | 0.673453 |
| Q9Y613    | FH1/FH2 domain-containing protein 1                  | FHOD1          | 1.354E+09 | 0.674962 |
| Q9H1I8    | Activating signal cointegrator 1 complex subunit 2   | ASCC2          | 189960000 | 0.675611 |
| Q6P1K8;Q1 | General transcription factor IIH subunit 2-like prot | GTF2H2C;GTF2H2 | 43456000  | 0.676646 |

|           |                                                      |               |           |          |
|-----------|------------------------------------------------------|---------------|-----------|----------|
| P09651;A0 | Heterogeneous nuclear ribonucleoprotein A1;Hete      | HNRNPA1;HNRNP | 1.73E+10  | 0.677818 |
| Q9NX20    | 39S ribosomal protein L16, mitochondrial             | MRPL16        | 176670000 | 0.679185 |
| P19525    | Interferon-induced, double-stranded RNA-activate     | EIF2AK2       | 669730000 | 0.681014 |
| O75886    | Signal transducing adapter molecule 2                | STAM2         | 111210000 | 0.681907 |
| Q9UKD2    | mRNA turnover protein 4 homolog                      | MRT04         | 426980000 | 0.68207  |
| Q9P270    | SLAIN motif-containing protein 2                     | SLAIN2        | 122740000 | 0.682668 |
| Q15424;Q1 | Scaffold attachment factor B1;Scaffold attachment    | SAFB;SAFB2    | 271230000 | 0.683485 |
| Q8WUA2    | Peptidyl-prolyl cis-trans isomerase-like 4           | PPIL4         | 225970000 | 0.68573  |
| P61247    | 40S ribosomal protein S3a                            | RPS3A         | 1.106E+10 | 0.686747 |
| Q9H0U3    | Magnesium transporter protein 1                      | MAGT1         | 200940000 | 0.689677 |
| Q92499    | ATP-dependent RNA helicase DDX1                      | DDX1          | 6.46E+09  | 0.691776 |
| O14979    | Heterogeneous nuclear ribonucleoprotein D-like       | HNRNPDL       | 2.164E+09 | 0.698079 |
| P25490    | Transcriptional repressor protein YY1                | YY1           | 17954000  | 0.702042 |
| Q8WY22    | BRI3-binding protein                                 | BRI3BP        | 101980000 | 0.704784 |
| Q8NE71    | ATP-binding cassette sub-family F member 1           | ABCF1         | 942500000 | 0.706561 |
| Q92615    | La-related protein 4B                                | LARP4B        | 355910000 | 0.711487 |
| O75818    | Ribonuclease P protein subunit p40                   | RPP40         | 78412000  | 0.715344 |
| Q8IXB1    | DnaJ homolog subfamily C member 10                   | DNAJC10       | 305500000 | 0.716749 |
| P30876    | DNA-directed RNA polymerase II subunit RPB2          | POLR2B        | 371910000 | 0.718847 |
| Q96HY6    | DDR GK domain-containing protein 1                   | DDR GK1       | 1.269E+09 | 0.720575 |
| Q7Z3C6    | Autophagy-related protein 9A                         | ATG9A         | 56892000  | 0.725825 |
| Q86UL3    | Glycerol-3-phosphate acyltransferase 4               | AGPAT6        | 19051000  | 0.72607  |
| P55769    | NHP2-like protein 1;NHP2-like protein 1, N-termin    | NHP2L1        | 177550000 | 0.726481 |
| P49792    | E3 SUMO-protein ligase RanBP2                        | RANBP2        | 1.231E+09 | 0.726977 |
| Q5VYS8    | Terminal uridylyltransferase 7                       | ZCCHC6        | 117630000 | 0.727055 |
| Q8N8I0    | Sterile alpha motif domain-containing protein 12     | SAMD12        | 22041000  | 0.72887  |
| Q03135    | Caveolin-1                                           | CAV1          | 1.157E+09 | 0.729116 |
| Q14137    | Ribosome biogenesis protein BOP1                     | BOP1          | 202860000 | 0.729632 |
| Q01082    | Spectrin beta chain, non-erythrocytic 1              | SPTBN1        | 3.212E+09 | 0.73184  |
| Q8N3C0    | Activating signal cointegrator 1 complex subunit 3   | ASCC3         | 301510000 | 0.73207  |
| Q9Y426    | C2 domain-containing protein 2                       | C2CD2         | 109030000 | 0.733711 |
| Q9NV56    | MRG/MORF4L-binding protein                           | MRGBP         | 159840000 | 0.740677 |
| O60524    | Nuclear export mediator factor NEMF                  | NEMF          | 153030000 | 0.741016 |
| Q9UQB8    | Brain-specific angiogenesis inhibitor 1-associated p | BAIAP2        | 526930000 | 0.748484 |
| Q12959    | Disks large homolog 1                                | DLG1          | 83219000  | 0.750364 |
| Q9UQ88;P2 | Cyclin-dependent kinase 11A;Cyclin-dependent kin     | CDK11A;CDK11B | 322870000 | 0.757386 |
| Q96GY0    | Zinc finger C2HC domain-containing protein 1A        | ZC2HC1A       | 13009000  | 0.758788 |
| Q96P47    | Arf-GAP with GTPase, ANK repeat and PH domain-       | AGAP3         | 270170000 | 0.760501 |
| Q8TDB6    | E3 ubiquitin-protein ligase DTX3L                    | DTX3L         | 137680000 | 0.761083 |
| Q9HCD5    | Nuclear receptor coactivator 5                       | NCOA5         | 52454000  | 0.761801 |
| Q9UPT8    | Zinc finger CCCH domain-containing protein 4         | ZC3H4         | 244620000 | 0.763196 |
| P53350    | Serine/threonine-protein kinase PLK1                 | PLK1          | 29744000  | 0.763975 |
| O43615    | Mitochondrial import inner membrane translocase      | TIMM44        | 1.615E+09 | 0.765486 |
| Q96T88    | E3 ubiquitin-protein ligase UHRF1                    | UHRF1         | 233600000 | 0.766202 |
| O43294    | Transforming growth factor beta-1-induced transcr    | TGFB11        | 116890000 | 0.766666 |
| Q7RTV0    | PHD finger-like domain-containing protein 5A         | PHF5A         | 62919000  | 0.769627 |
| O15212    | Prefoldin subunit 6                                  | PFDN6         | 11670000  | 0.7698   |
| Q6P1L8    | 39S ribosomal protein L14, mitochondrial             | MRPL14        | 160760000 | 0.770234 |
| O00560    | Syntenin-1                                           | SDCBP         | 5.529E+09 | 0.774857 |
| Q8TAP9    | M-phase-specific PLK1-interacting protein            | MPLKIP        | 12342000  | 0.774906 |

|           |                                                                                |               |           |          |
|-----------|--------------------------------------------------------------------------------|---------------|-----------|----------|
| Q9HD33    | 39S ribosomal protein L47, mitochondrial                                       | MRPL47        | 312860000 | 0.776009 |
| Q9NVU7    | Protein SDA1 homolog                                                           | SDAD1         | 51180000  | 0.77627  |
| Q9Y5X2    | Sorting nexin-8                                                                | SNX8          | 257890000 | 0.778089 |
| Q9NRW3    | DNA dC->dU-editing enzyme APOBEC-3C                                            | APOBEC3C      | 63858000  | 0.778176 |
| Q8IVS2    | Malonyl-CoA-acyl carrier protein transacylase, mitochondrial                   | MCAT          | 43843000  | 0.780377 |
| P52926    | High mobility group protein HMGI-C                                             | HMGA2         | 45132000  | 0.782424 |
| Q86YP4    | Transcriptional repressor p66-alpha                                            | GATAD2A       | 185400000 | 0.791729 |
| P12235    | ADP/ATP translocase 1                                                          | SLC25A4       | 204460000 | 0.793341 |
| Q16678    | Cytochrome P450 1B1                                                            | CYP1B1        | 50816000  | 0.794662 |
| P82675    | 28S ribosomal protein S5, mitochondrial                                        | MRPS5         | 332360000 | 0.797628 |
| Q9NZI8    | Insulin-like growth factor 2 mRNA-binding protein                              | IGF2BP1       | 2.614E+09 | 0.798274 |
| Q9BQ51    | Programmed cell death 1 ligand 2                                               | PDCD1LG2      | 10041000  | 0.799908 |
| Q15029    | 116 kDa U5 small nuclear ribonucleoprotein complex                             | EFTUD2        | 3.743E+09 | 0.800285 |
| O95714    | E3 ubiquitin-protein ligase HERC2                                              | HERC2         | 94183000  | 0.800734 |
| Q5BJF2    | Transmembrane protein 97                                                       | TMEM97        | 41495000  | 0.803481 |
| Q8WXF1    | Paraspeckle component 1                                                        | PSPC1         | 806580000 | 0.804507 |
| Q9Y241    | HIG1 domain family member 1A, mitochondrial                                    | HIGD1A        | 154430000 | 0.805485 |
| Q14683    | Structural maintenance of chromosomes protein 1                                | SMC1A         | 1.446E+09 | 0.808594 |
| O15228    | Dihydroxyacetone phosphate acyltransferase                                     | GNPAT         | 174320000 | 0.810774 |
| Q07021    | Complement component 1 Q subcomponent-binding protein                          | C1QBP         | 1.026E+10 | 0.812299 |
| Q9GZZ1    | N-alpha-acetyltransferase 50                                                   | NAA50         | 701550000 | 0.812819 |
| Q9UBU9    | Nuclear RNA export factor 1                                                    | NXF1          | 101180000 | 0.81542  |
| Q08380    | Galectin-3-binding protein                                                     | LGALS3BP      | 321180000 | 0.818679 |
| Q92562    | Polyphosphoinositide phosphatase                                               | FIG4          | 119200000 | 0.820409 |
| Q7Z739    | YTH domain-containing family protein 3                                         | YTHDF3        | 367350000 | 0.821047 |
| Q08945    | FACT complex subunit SSRP1                                                     | SSRP1         | 2.775E+09 | 0.825678 |
| Q99661    | Kinesin-like protein KIF2C                                                     | KIF2C         | 147970000 | 0.826453 |
| Q9ULX6    | A-kinase anchor protein 8-like                                                 | AKAP8L        | 225010000 | 0.829964 |
| O43709    | Probable 18S rRNA (guanine-N(7))-methyltransferase                             | WBSCR22       | 198070000 | 0.831586 |
| Q15678    | Tyrosine-protein phosphatase non-receptor type 1                               | PTPN14        | 113380000 | 0.835004 |
| O75323    | Protein NipSnap homolog 2                                                      | GBAS          | 334890000 | 0.836613 |
| O75940    | Survival of motor neuron-related-splicing factor 30                            | SMNDC1        | 228050000 | 0.839784 |
| Q96TA2    | ATP-dependent zinc metalloprotease YME1L1                                      | YME1L1        | 328400000 | 0.84216  |
| O94851    | Protein-methionine sulfoxide oxidase MICAL2                                    | MICAL2        | 26426000  | 0.845741 |
| Q16629    | Serine/arginine-rich splicing factor 7                                         | SRSF7         | 921840000 | 0.846405 |
| Q9NRX2    | 39S ribosomal protein L17, mitochondrial                                       | MRPL17        | 129060000 | 0.849019 |
| Q15554    | Telomeric repeat-binding factor 2                                              | TERF2         | 101400000 | 0.850083 |
| Q9UDT6    | CAP-Gly domain-containing linker protein 2                                     | CLIP2         | 77215000  | 0.854975 |
| P62269    | 40S ribosomal protein S18                                                      | RPS18         | 7.677E+09 | 0.856353 |
| Q71UM5    | 40S ribosomal protein S27-like                                                 | RPS27L        | 213860000 | 0.857797 |
| P82663    | 28S ribosomal protein S25, mitochondrial                                       | MRPS25        | 112850000 | 0.85953  |
| P82914    | 28S ribosomal protein S15, mitochondrial                                       | MRPS15        | 33044000  | 0.86736  |
| O60264    | SWI/SNF-related matrix-associated actin-dependent nucleosome assembly factor 5 | SMARCA5       | 461740000 | 0.870307 |
| P22626    | Heterogeneous nuclear ribonucleoproteins A2/B1                                 | HNRNPA2B1     | 1.253E+10 | 0.872017 |
| P0DMV9;P1 | Heat shock 70 kDa protein 1B;Heat shock 70 kDa protein 1A                      | HSPA1B;HSPA1A | 8.492E+09 | 0.877286 |
| P49916    | DNA ligase 3                                                                   | LIG3          | 126370000 | 0.878439 |
| P25398    | 40S ribosomal protein S12                                                      | RPS12         | 3.19E+09  | 0.878544 |
| P18510    | Interleukin-1 receptor antagonist protein                                      | IL1RN         | 76861000  | 0.880739 |
| Q96II8    | Leucine-rich repeat and calponin homology domain-containing protein 3          | LRCH3         | 23505000  | 0.885351 |
| O43390    | Heterogeneous nuclear ribonucleoprotein R                                      | HNRNPR        | 2.05E+09  | 0.894483 |

|           |                                                     |                 |           |          |
|-----------|-----------------------------------------------------|-----------------|-----------|----------|
| A4D1E9    | GTP-binding protein 10                              | GTPBP10         | 214310000 | 0.897076 |
| O15226    | NF-kappa-B-repressing factor                        | NKRF            | 32344000  | 0.903013 |
| P78357    | Contactin-associated protein 1                      | CNTNAP1         | 66707000  | 0.905964 |
| Q8WV07    | Oral cancer-overexpressed protein 1                 | ORAOV1          | 9657400   | 0.90671  |
| Q59GN2;P6 | Putative 60S ribosomal protein L39-like 5;60S ribos | RPL39P5;RPL39   | 607150000 | 0.907525 |
| Q01804    | OTU domain-containing protein 4                     | OTUD4           | 33466000  | 0.907698 |
| P67870    | Casein kinase II subunit beta                       | CSNK2B          | 180480000 | 0.910153 |
| Q9Y230    | RuvB-like 2                                         | RUVBL2          | 6.419E+09 | 0.910272 |
| Q9Y4P3    | Transducin beta-like protein 2                      | TBL2            | 521540000 | 0.914825 |
| P68032;P6 | Actin, alpha cardiac muscle 1;Actin, gamma-enteric  | ACTC1;ACTG2;ACT | 1.501E+10 | 0.916583 |
| O60506    | Heterogeneous nuclear ribonucleoprotein Q           | SYNCRIP         | 7.764E+09 | 0.920463 |
| Q9P0K7    | Ankycorbin                                          | RAI14           | 705020000 | 0.923324 |
| Q9BZH6    | WD repeat-containing protein 11                     | WDR11           | 1.681E+10 | 0.926348 |
| Q96JP5    | E3 ubiquitin-protein ligase ZFP91                   | ZFP91           | 53931000  | 0.9285   |
| Q9ULJ3    | Zinc finger and BTB domain-containing protein 21    | ZBTB21          | 34988000  | 0.92855  |
| Q8TAE8    | Growth arrest and DNA damage-inducible proteins     | GADD45GIP1      | 391660000 | 0.929114 |
| Q06265    | Exosome complex component RRP45                     | EXOSC9          | 283010000 | 0.931822 |
| Q8NFW8    | N-acetylneuraminase cytidyltransferase              | CMAS            | 226690000 | 0.93478  |
| P08047    | Transcription factor Sp1                            | SP1             | 71856000  | 0.935165 |
| Q9NNW5    | WD repeat-containing protein 6                      | WDR6            | 157180000 | 0.936907 |
| Q9Y383    | Putative RNA-binding protein Luc7-like 2            | LUC7L2          | 1.445E+09 | 0.93835  |
| Q9BZF3    | Oxysterol-binding protein-related protein 6         | OSBPL6          | 44800000  | 0.940327 |
| Q01780    | Exosome component 10                                | EXOSC10         | 1.008E+09 | 0.943534 |
| Q13310    | Polyadenylate-binding protein 4                     | PABPC4          | 7.68E+09  | 0.953529 |
| Q9BQ61    | Uncharacterized protein C19orf43                    | C19orf43        | 255520000 | 0.957452 |
| Q15149    | Plectin                                             | PLEC            | 2.414E+10 | 0.958169 |
| P0DN76;Q  | Splicing factor U2AF 35 kDa subunit                 | U2AF1           | 1.519E+09 | 0.958187 |
| Q9HAB8    | Phosphopantothenate--cysteine ligase                | PPCS            | 50465000  | 0.958275 |
| Q14527    | Helicase-like transcription factor                  | HLTF            | 685690000 | 0.958982 |
| Q9BUQ8    | Probable ATP-dependent RNA helicase DDX23           | DDX23           | 779590000 | 0.961194 |
| Q8WVM0    | Dimethyladenosine transferase 1, mitochondrial      | TFB1M           | 35449000  | 0.963578 |
| P61962    | DDB1- and CUL4-associated factor 7                  | DCAF7           | 206850000 | 0.967538 |
| Q9NPD3    | Exosome complex component RRP41                     | EXOSC4          | 466830000 | 0.969352 |
| Q9NZC9    | SWI/SNF-related matrix-associated actin-dependent   | SMARCAL1        | 60703000  | 0.97321  |
| O15160    | DNA-directed RNA polymerases I and III subunit RF   | POLR1C          | 558130000 | 0.97647  |
| P49585    | Choline-phosphate cytidyltransferase A              | PCYT1A          | 289150000 | 0.977874 |
| Q9H814    | Phosphorylated adapter RNA export protein           | PHAX            | 222510000 | 0.979633 |
| Q8NHQ9    | ATP-dependent RNA helicase DDX55                    | DDX55           | 74998000  | 0.981616 |
| P19784    | Casein kinase II subunit alpha                      | CSNK2A2         | 689940000 | 0.988722 |
| Q63ZY3    | KN motif and ankyrin repeat domain-containing pr    | KANK2           | 271930000 | 0.988904 |
| P54132    | Bloom syndrome protein                              | BLM             | 215420000 | 0.991686 |
| P60866    | 40S ribosomal protein S20                           | RPS20           | 3.004E+09 | 0.996944 |
| Q96T51    | RUN and FYVE domain-containing protein 1            | RUFY1           | 124830000 | 1.0001   |
| P52597    | Heterogeneous nuclear ribonucleoprotein F;Hetero    | HNRNPF          | 8.29E+09  | 1.001032 |
| O75955    | Flotillin-1                                         | FLOT1           | 109560000 | 1.002555 |
| Q01433    | AMP deaminase 2                                     | AMPD2           | 347780000 | 1.004184 |
| P46782    | 40S ribosomal protein S5;40S ribosomal protein S5   | RPS5            | 4.905E+09 | 1.005341 |
| Q9Y281    | Cofilin-2                                           | CFL2            | 1.703E+09 | 1.006067 |
| Q6P4A7    | Sideroflexin-4                                      | SFXN4           | 49989000  | 1.007396 |
| O14936    | Peripheral plasma membrane protein CASK             | CASK            | 37596000  | 1.009318 |



|            |                                                     |                |           |          |
|------------|-----------------------------------------------------|----------------|-----------|----------|
| O43707     | Alpha-actinin-4                                     | ACTN4          | 3.557E+10 | 1.010711 |
| P62857     | 40S ribosomal protein S28                           | RPS28          | 4.091E+09 | 1.011966 |
| P62277     | 40S ribosomal protein S13                           | RPS13          | 1.246E+10 | 1.015632 |
| P55795     | Heterogeneous nuclear ribonucleoprotein H2          | HNRNPH2        | 585410000 | 1.017496 |
| Q9BU76     | Multiple myeloma tumor-associated protein 2         | MMTAG2         | 47873000  | 1.019974 |
| Q15773     | Myeloid leukemia factor 2                           | MLF2           | 153350000 | 1.020283 |
| Q8N7H5     | RNA polymerase II-associated factor 1 homolog       | PAF1           | 437170000 | 1.02214  |
| Q96DA6     | Mitochondrial import inner membrane translocase     | DNAJC19        | 80346000  | 1.026338 |
| Q5VST9     | Obscurin                                            | OBSCN          | 157910000 | 1.027306 |
| P46781     | 40S ribosomal protein S9                            | RPS9           | 8.704E+09 | 1.030497 |
| Q7L4I2     | Arginine/serine-rich coiled-coil protein 2          | RSRC2          | 99955000  | 1.030901 |
| P62263     | 40S ribosomal protein S14                           | RPS14          | 5.188E+09 | 1.031954 |
| Q9UKN8     | General transcription factor 3C polypeptide 4       | GTF3C4         | 191740000 | 1.032266 |
| Q9Y3B7     | 39S ribosomal protein L11, mitochondrial            | MRPL11         | 489980000 | 1.039048 |
| P40429     | 60S ribosomal protein L13a                          | RPL13A         | 4.411E+09 | 1.045471 |
| P62888     | 60S ribosomal protein L30                           | RPL30          | 1.364E+09 | 1.048377 |
| Q9Y3T9     | Nucleolar complex protein 2 homolog                 | NOC2L          | 163110000 | 1.063079 |
| O94906     | Pre-mRNA-processing factor 6                        | PRPF6          | 512140000 | 1.065968 |
| P53814     | Smoothelin                                          | SMTN           | 145310000 | 1.067906 |
| Q6VY07     | Phosphofurin acidic cluster sorting protein 1       | PACS1          | 149400000 | 1.068676 |
| P32969     | 60S ribosomal protein L9                            | RPL9           | 4.339E+09 | 1.06871  |
| Q8IX12     | Cell division cycle and apoptosis regulator protein | CCAR1          | 685230000 | 1.069881 |
| Q8TEM1     | Nuclear pore membrane glycoprotein 210              | NUP210         | 191260000 | 1.072787 |
| P31942     | Heterogeneous nuclear ribonucleoprotein H3          | HNRNPH3        | 475640000 | 1.073575 |
| Q02809     | Procollagen-lysine,2-oxoglutarate 5-dioxygenase 1   | PLOD1          | 1.909E+09 | 1.076222 |
| P40938     | Replication factor C subunit 3                      | RFC3           | 127420000 | 1.078121 |
| Q9NUQ6     | SPATS2-like protein                                 | SPATS2L        | 591420000 | 1.078267 |
| Q8IZ69     | tRNA (uracil-5-)-methyltransferase homolog A        | TRMT2A         | 13692000  | 1.079582 |
| Q16698     | 2,4-dienoyl-CoA reductase, mitochondrial            | DECR1          | 1.162E+09 | 1.082528 |
| P49750     | YLP motif-containing protein 1                      | YLPM1          | 140880000 | 1.083348 |
| Q9P035     | Very-long-chain (3R)-3-hydroxyacyl-CoA dehydrata    | HACD3          | 1.124E+09 | 1.084261 |
| Q15397     | Pumilio domain-containing protein KIAA0020          | KIAA0020       | 277990000 | 1.084563 |
| P31943     | Heterogeneous nuclear ribonucleoprotein H;Heter     | HNRNPH1        | 1.243E+10 | 1.086206 |
| Q8IWR0     | Zinc finger CCCH domain-containing protein 7A       | ZC3H7A         | 76355000  | 1.090613 |
| O95232     | Luc7-like protein 3                                 | LUC7L3         | 914350000 | 1.09148  |
| P62266     | 40S ribosomal protein S23                           | RPS23          | 3.811E+09 | 1.093203 |
| Q92600     | Cell differentiation protein RCD1 homolog           | RQCD1          | 111750000 | 1.093624 |
| Q9NP77     | RNA polymerase II subunit A C-terminal domain p     | SSU72          | 147580000 | 1.094641 |
| Q63HN8     | E3 ubiquitin-protein ligase RNF213                  | RNF213         | 815560000 | 1.094918 |
| Q13510     | Acid ceramidase;Acid ceramidase subunit alpha;Ac    | ASAH1          | 312150000 | 1.095143 |
| P27169     | Serum paraoxonase/arylesterase 1                    | PON1           | 998990000 | 1.104322 |
| Q13136     | Liprin-alpha-1                                      | PPFIA1         | 236950000 | 1.108729 |
| Q8IVF6;A2/ | Ankyrin repeat domain-containing protein 18A;Anl    | ANKRD18A;ANKRC | 88802000  | 1.113731 |
| O75190     | DnaJ homolog subfamily B member 6                   | DNAJB6         | 54069000  | 1.114686 |
| Q9H300     | Presenilins-associated rhomboid-like protein, mito  | PARL           | 10525000  | 1.117558 |
| P10586     | Receptor-type tyrosine-protein phosphatase F        | PTPRF          | 240210000 | 1.118174 |
| L0R819     |                                                     | ASNSD1         | 59013000  | 1.122526 |
| P62851     | 40S ribosomal protein S25                           | RPS25          | 3.848E+09 | 1.122879 |
| P49756     | RNA-binding protein 25                              | RBM25          | 470160000 | 1.123605 |
| Q86U42     | Polyadenylate-binding protein 2                     | PABPN1         | 539110000 | 1.130493 |

|           |                                                                |                 |           |          |
|-----------|----------------------------------------------------------------|-----------------|-----------|----------|
| Q13506    | NGFI-A-binding protein 1                                       | NAB1            | 16318000  | 1.132512 |
| P20042    | Eukaryotic translation initiation factor 2 subunit 2           | EIF2S2          | 2.126E+09 | 1.13571  |
| Q15154    | Pericentriolar material 1 protein                              | PCM1            | 78540000  | 1.138427 |
| Q9Y3C6    | Peptidyl-prolyl cis-trans isomerase-like 1                     | PPIL1           | 220480000 | 1.140217 |
| Q5T5Y3    | Calmodulin-regulated spectrin-associated protein               | CAMSAP1         | 65891000  | 1.143195 |
| Q8TBA6    | Golgin subfamily A member 5                                    | GOLGA5          | 240620000 | 1.144136 |
| Q9BQ48    | 39S ribosomal protein L34, mitochondrial                       | MRPL34          | 48702000  | 1.144698 |
| P62241    | 40S ribosomal protein S8                                       | RPS8            | 9.492E+09 | 1.14906  |
| Q96RN5    | Mediator of RNA polymerase II transcription subunit 15         | MED15           | 32656000  | 1.151788 |
| P39019    | 40S ribosomal protein S19                                      | RPS19           | 5.118E+09 | 1.157726 |
| Q70UQ0    | Inhibitor of nuclear factor kappa-B kinase-interacting protein | IKBIP           | 235090000 | 1.158791 |
| P62910    | 60S ribosomal protein L32                                      | RPL32           | 1.652E+09 | 1.162486 |
| Q15024    | Exosome complex component RRP42                                | EXOSC7          | 438630000 | 1.164926 |
| Q9BUJ2    | Heterogeneous nuclear ribonucleoprotein U-like protein 1       | HNRNPUL1        | 1.112E+09 | 1.16847  |
| Q02241    | Kinesin-like protein KIF23                                     | KIF23           | 213200000 | 1.168939 |
| O43663    | Protein regulator of cytokinesis 1                             | PRC1            | 103160000 | 1.169713 |
| Q13428    | Treacle protein                                                | TCOF1           | 1.206E+09 | 1.172514 |
| Q9HC36    | rRNA methyltransferase 3, mitochondrial                        | RNMTL1          | 17349000  | 1.176667 |
| P63173    | 60S ribosomal protein L38                                      | RPL38           | 2.754E+09 | 1.177054 |
| P50750    | Cyclin-dependent kinase 9                                      | CDK9            | 81233000  | 1.178724 |
| P05386    | 60S acidic ribosomal protein P1                                | RPLP1           | 920250000 | 1.180979 |
| Q3MHD2    | Protein LSM12 homolog                                          | LSM12           | 333910000 | 1.181517 |
| P17096    | High mobility group protein HMG-I/HMG-Y                        | HMGGA1          | 631800000 | 1.182772 |
| P15407    | Fos-related antigen 1                                          | FOSL1           | 342520000 | 1.202298 |
| O00425    | Insulin-like growth factor 2 mRNA-binding protein              | IGF2BP3         | 2.101E+09 | 1.204431 |
| Q4KMP7    | TBC1 domain family member 10B                                  | TBC1D10B        | 375920000 | 1.216563 |
| Q6PGP7    | Tetratricopeptide repeat protein 37                            | TTC37           | 22398000  | 1.216794 |
| P52298    | Nuclear cap-binding protein subunit 2                          | NCBP2           | 83777000  | 1.216911 |
| P62829    | 60S ribosomal protein L23                                      | RPL23           | 6.107E+09 | 1.224802 |
| Q12904    | Aminoacyl tRNA synthase complex-interacting multiprotein 1     | AIMP1           | 2.561E+09 | 1.228862 |
| Q96B26    | Exosome complex component RRP43                                | EXOSC8          | 246300000 | 1.22916  |
| P68400;Q8 | Casein kinase II subunit alpha;Casein kinase II subunit beta   | CSNK2A1;CSNK2A2 | 2.97E+09  | 1.234484 |
| Q9H7B2    | Ribosome production factor 2 homolog                           | RPF2            | 168080000 | 1.235272 |
| Q8WTT2    | Nucleolar complex protein 3 homolog                            | NOC3L           | 242540000 | 1.237576 |
| Q8WVC0    | RNA polymerase-associated protein LEO1                         | LEO1            | 133780000 | 1.239686 |
| Q8IVF7    | Formin-like protein 3                                          | FMNL3           | 133620000 | 1.240173 |
| Q12849    | G-rich sequence factor 1                                       | GRSF1           | 1.857E+09 | 1.243472 |
| P37108    | Signal recognition particle 14 kDa protein                     | SRP14           | 3.741E+09 | 1.243823 |
| P11940    | Polyadenylate-binding protein 1                                | PABPC1          | 6.306E+09 | 1.24516  |
| Q8IXK0    | Polyhomeotic-like protein 2                                    | PHC2            | 160860000 | 1.247517 |
| P62854;Q5 | 40S ribosomal protein S26;Putative 40S ribosomal protein S26   | RPS26;RPS26P11  | 4.491E+09 | 1.261526 |
| Q02878    | 60S ribosomal protein L6                                       | RPL6            | 1.762E+10 | 1.266484 |
| Q92541    | RNA polymerase-associated protein RTF1 homolog                 | RTF1            | 157290000 | 1.268302 |
| Q5C9Z4    | Nucleolar MIF4G domain-containing protein 1                    | NOM1            | 67136000  | 1.268607 |
| Q9BPW8    | Protein NipSnap homolog 1                                      | NIPSNAP1        | 875720000 | 1.270396 |
| Q8IWX8    | Calcium homeostasis endoplasmic reticulum protein 1            | CHERP           | 370580000 | 1.272149 |
| Q8WUR7    | UPF0235 protein C15orf40                                       | C15orf40        | 88847000  | 1.274057 |
| Q8TDD1    | ATP-dependent RNA helicase DDX54                               | DDX54           | 249900000 | 1.277142 |
| P42677    | 40S ribosomal protein S27                                      | RPS27           | 3.118E+09 | 1.277237 |
| Q96E11    | Ribosome-recycling factor, mitochondrial                       | MRRF            | 385970000 | 1.277879 |

|           |                                                     |               |           |          |
|-----------|-----------------------------------------------------|---------------|-----------|----------|
| Q71UI9;P0 | Histone H2A.V;Histone H2A.Z                         | H2AFV;H2AFZ   | 143080000 | 1.281585 |
| O43854    | EGF-like repeat and discoidin I-like domain-contain | EDIL3         | 165570000 | 1.28309  |
| P48634    | Protein PRRC2A                                      | PRRC2A        | 118760000 | 1.284336 |
| O60573    | Eukaryotic translation initiation factor 4E type 2  | EIF4E2        | 140810000 | 1.28574  |
| P31689    | DnaJ homolog subfamily A member 1                   | DNAJA1        | 2.7E+09   | 1.291544 |
| P36578    | 60S ribosomal protein L4                            | RPL4          | 1.709E+10 | 1.292637 |
| Q6PKG0    | La-related protein 1                                | LARP1         | 3.036E+09 | 1.292996 |
| P05412    | Transcription factor AP-1                           | JUN           | 112160000 | 1.293987 |
| O95772    | MLN64 N-terminal domain homolog                     | STAR3NL       | 87298000  | 1.296267 |
| Q86WJ1    | Chromodomain-helicase-DNA-binding protein 1-lik     | CHD1L         | 276820000 | 1.299758 |
| P14866    | Heterogeneous nuclear ribonucleoprotein L           | HNRNPL        | 3.926E+09 | 1.303265 |
| Q08211    | ATP-dependent RNA helicase A                        | DHX9          | 1.191E+10 | 1.303814 |
| Q6GMV2    | SET and MYND domain-containing protein 5            | SMYD5         | 86866000  | 1.307374 |
| Q7Z2T5    | TRMT1-like protein                                  | TRMT1L        | 285680000 | 1.317332 |
| Q9H2V7    | Protein spinster homolog 1                          | SPNS1         | 32118000  | 1.317842 |
| Q96HS1    | Serine/threonine-protein phosphatase PGAM5, mi      | PGAM5         | 714960000 | 1.318897 |
| P40937    | Replication factor C subunit 5                      | RFC5          | 483420000 | 1.319118 |
| Q15650    | Activating signal cointegrator 1                    | TRIP4         | 119060000 | 1.321874 |
| Q92974    | Rho guanine nucleotide exchange factor 2            | ARHGEF2       | 2.159E+09 | 1.322967 |
| P39023    | 60S ribosomal protein L3                            | RPL3          | 1.946E+10 | 1.329359 |
| Q8NB90    | Spermatogenesis-associated protein 5                | SPATA5        | 222620000 | 1.332113 |
| Q9P2Q2    | FERM domain-containing protein 4A                   | FRMD4A        | 14463000  | 1.332304 |
| Q92522    | Histone H1x                                         | H1FX          | 271100000 | 1.333814 |
| Q13151    | Heterogeneous nuclear ribonucleoprotein A0          | HNRNPA0       | 1.95E+09  | 1.334532 |
| Q9Y3I0    | tRNA-splicing ligase RtcB homolog                   | RTCB          | 7.139E+09 | 1.337494 |
| Q9BYJ9    | YTH domain-containing family protein 1              | YTHDF1        | 63845000  | 1.339374 |
| O43920    | NADH dehydrogenase [ubiquinone] iron-sulfur pro     | NDUFS5        | 198650000 | 1.340446 |
| Q9Y5Q9    | General transcription factor 3C polypeptide 3       | GTF3C3        | 147380000 | 1.351088 |
| P37840    | Alpha-synuclein                                     | SNCA          | 75892000  | 1.352185 |
| P55040    | GTP-binding protein GEM                             | GEM           | 32282000  | 1.353461 |
| Q5JTH9    | RRP12-like protein                                  | RRP12         | 625930000 | 1.361612 |
| P06748    | Nucleophosmin                                       | NPM1          | 5.208E+10 | 1.363908 |
| Q13243    | Serine/arginine-rich splicing factor 5              | SRSF5         | 553920000 | 1.369459 |
| P05388;Q8 | 60S acidic ribosomal protein P0;60S acidic ribosom  | RPLP0;RPLP0P6 | 2.39E+10  | 1.370851 |
| O00139    | Kinesin-like protein KIF2A                          | KIF2A         | 117730000 | 1.371674 |
| Q9BQG0    | Myb-binding protein 1A                              | MYBBP1A       | 2.636E+09 | 1.373538 |
| P62424    | 60S ribosomal protein L7a                           | RPL7A         | 8.67E+09  | 1.373928 |
| Q9UGR2    | Zinc finger CCCH domain-containing protein 7B       | ZC3H7B        | 82174000  | 1.375008 |
| Q9H967    | WD repeat-containing protein 76                     | WDR76         | 8334700   | 1.376168 |
| Q8IV48    | 3-5 exoribonuclease 1                               | ERI1          | 44015000  | 1.381487 |
| Q8WVK2    | U4/U6.U5 small nuclear ribonucleoprotein 27 kDa     | SNRNP27       | 121220000 | 1.383314 |
| P82930    | 28S ribosomal protein S34, mitochondrial            | MRPS34        | 227780000 | 1.384534 |
| O00458    | Interferon-related developmental regulator 1        | IFRD1         | 102870000 | 1.388142 |
| Q01130    | Serine/arginine-rich splicing factor 2              | SRSF2         | 2.607E+09 | 1.388991 |
| O00571;O1 | ATP-dependent RNA helicase DDX3X;ATP-depende        | DDX3X;DDX3Y   | 7.758E+09 | 1.39025  |
| Q13283    | Ras GTPase-activating protein-binding protein 1     | G3BP1         | 3.085E+09 | 1.392788 |
| Q14257    | Reticulocalbin-2                                    | RCN2          | 1.417E+09 | 1.393893 |
| O75475    | PC4 and SFRS1-interacting protein                   | PSIP1         | 207600000 | 1.39712  |
| O00411    | DNA-directed RNA polymerase, mitochondrial          | POLRMT        | 93146000  | 1.39864  |
| Q13247    | Serine/arginine-rich splicing factor 6              | SRSF6         | 1.494E+09 | 1.401985 |

|           |                                                   |                  |           |          |
|-----------|---------------------------------------------------|------------------|-----------|----------|
| Q9NVH2    | Integrator complex subunit 7                      | INTS7            | 356710000 | 1.404655 |
| P35637    | RNA-binding protein FUS                           | FUS              | 4.006E+09 | 1.407659 |
| Q9P2N5    | RNA-binding protein 27                            | RBM27            | 118370000 | 1.410563 |
| Q4G0J3    | La-related protein 7                              | LARP7            | 308580000 | 1.410765 |
| P19338    | Nucleolin                                         | NCL              | 4.079E+10 | 1.412346 |
| P49247    | Ribose-5-phosphate isomerase                      | RPIA             | 131680000 | 1.413147 |
| Q8IZQ5    | Selenoprotein H                                   | SELH             | 364110000 | 1.416231 |
| Q9BZI7    | Regulator of nonsense transcripts 3B              | UPF3B            | 165910000 | 1.417004 |
| Q96PK6    | RNA-binding protein 14                            | RBM14            | 601180000 | 1.424478 |
| Q12906    | Interleukin enhancer-binding factor 3             | ILF3             | 4.019E+09 | 1.426801 |
| Q86V81    | THO complex subunit 4                             | ALYREF           | 2.775E+09 | 1.427439 |
| Q96EY1    | DnaJ homolog subfamily A member 3, mitochondri    | DNAJA3           | 160860000 | 1.428221 |
| Q9BT25    | HAUS augmin-like complex subunit 8                | HAUS8            | 275550000 | 1.434093 |
| Q9Y3B2    | Exosome complex component CSL4                    | EXOSC1           | 989520000 | 1.437494 |
| Q01469    | Fatty acid-binding protein, epidermal             | FABP5            | 415110000 | 1.439445 |
| Q9UKX7    | Nuclear pore complex protein Nup50                | NUP50            | 298380000 | 1.442473 |
| Q53F19    | Uncharacterized protein C17orf85                  | C17orf85         | 342200000 | 1.445386 |
| Q8N5L8    | Ribonuclease P protein subunit p25-like protein   | RPP25L           | 213120000 | 1.446194 |
| Q15388    | Mitochondrial import receptor subunit TOM20 hor   | TOMM20           | 813860000 | 1.448229 |
| Q02543    | 60S ribosomal protein L18a                        | RPL18A           | 1.496E+09 | 1.448982 |
| P84103    | Serine/arginine-rich splicing factor 3            | SRSF3            | 2.338E+09 | 1.449052 |
| O75381    | Peroxisomal membrane protein PEX14                | PEX14            | 103090000 | 1.453404 |
| Q6NZI2    | Polymerase I and transcript release factor        | PTRF             | 4.066E+09 | 1.455749 |
| Q99878;Q9 | Histone H2A type 1-J;Histone H2A type 1-H;Histon  | HIST1H2AJ;HIST1H | 5.304E+09 | 1.463319 |
| Q9NR30    | Nucleolar RNA helicase 2                          | DDX21            | 3.812E+09 | 1.465359 |
| Q15014    | Mortality factor 4-like protein 2                 | MORF4L2          | 303670000 | 1.467985 |
| O94992    | Protein HEXIM1                                    | HEXIM1           | 230180000 | 1.470791 |
| Q14498    | RNA-binding protein 39                            | RBM39            | 1.645E+09 | 1.471426 |
| Q9NVI7    | ATPase family AAA domain-containing protein 3A    | ATAD3A           | 4.493E+09 | 1.474105 |
| O60832    | H/ACA ribonucleoprotein complex subunit 4         | DKC1             | 627870000 | 1.475417 |
| Q9NXV6    | CDKN2A-interacting protein                        | CDKN2AIP         | 749120000 | 1.477876 |
| P11021    | 78 kDa glucose-regulated protein                  | HSPA5            | 7.681E+10 | 1.481666 |
| P11182    | Lipoamide acyltransferase component of branched   | DBT              | 248550000 | 1.488717 |
| Q9UKV3    | Apoptotic chromatin condensation inducer in the r | ACIN1            | 257290000 | 1.492855 |
| Q9H974    | Queuine tRNA-ribosyltransferase subunit QTRTD1    | QTRTD1           | 154480000 | 1.494345 |
| Q9BVP2    | Guanine nucleotide-binding protein-like 3         | GNL3             | 704740000 | 1.49454  |
| Q92614    | Unconventional myosin-XVIIIa                      | MYO18A           | 2.503E+09 | 1.494677 |
| Q7Z2W4    | Zinc finger CCCH-type antiviral protein 1         | ZC3HAV1          | 775250000 | 1.49794  |
| Q969Q0    | 60S ribosomal protein L36a-like                   | RPL36AL          | 656190000 | 1.5066   |
| Q9Y6M1    | Insulin-like growth factor 2 mRNA-binding protein | IGF2BP2          | 186310000 | 1.510495 |
| Q9BYG3    | MKI67 FHA domain-interacting nucleolar phospho    | NIFK             | 682580000 | 1.512342 |
| P22087    | rRNA 2-O-methyltransferase fibrillar              | FBL              | 524280000 | 1.516266 |
| Q86VM9    | Zinc finger CCCH domain-containing protein 18     | ZC3H18           | 807750000 | 1.518234 |
| P16401    | Histone H1.5                                      | HIST1H1B         | 814940000 | 1.518441 |
| Q9Y3D7    | Mitochondrial import inner membrane translocase   | PAM16            | 166960000 | 1.523455 |
| Q9H9E3    | Conserved oligomeric Golgi complex subunit 4      | COG4             | 108330000 | 1.527916 |
| P46776    | 60S ribosomal protein L27a                        | RPL27A           | 4.693E+09 | 1.528077 |
| O75175    | CCR4-NOT transcription complex subunit 3          | CNOT3            | 289130000 | 1.528913 |
| Q13123    | Protein Red                                       | IK               | 133170000 | 1.529535 |
| P78345    | Ribonuclease P protein subunit p38                | RPP38            | 1.374E+09 | 1.532443 |

|           |                                                      |               |           |          |
|-----------|------------------------------------------------------|---------------|-----------|----------|
| O95399    | Urotensin-2                                          | UTS2          | 1.392E+09 | 1.539075 |
| Q9H6S0    | Probable ATP-dependent RNA helicase YTHDC2           | YTHDC2        | 115520000 | 1.54335  |
| P06280    | Alpha-galactosidase A                                | GLA           | 189240000 | 1.550423 |
| P62841    | 40S ribosomal protein S15                            | RPS15         | 5.716E+09 | 1.550496 |
| Q9NY93    | Probable ATP-dependent RNA helicase DDX56            | DDX56         | 49867000  | 1.552249 |
| Q6ZNB6    | NF-X1-type zinc finger protein NFXL1                 | NFXL1         | 35488000  | 1.554328 |
| P61313    | 60S ribosomal protein L15                            | RPL15         | 7.591E+09 | 1.558885 |
| O95985    | DNA topoisomerase 3-beta-1                           | TOP3B         | 24893000  | 1.567524 |
| P84098    | 60S ribosomal protein L19                            | RPL19         | 3.749E+09 | 1.568491 |
| P27635    | 60S ribosomal protein L10                            | RPL10         | 4.509E+09 | 1.569859 |
| P18077    | 60S ribosomal protein L35a                           | RPL35A        | 2.948E+09 | 1.570657 |
| Q9Y221    | 60S ribosome subunit biogenesis protein NIP7 hom     | NIP7          | 149830000 | 1.573236 |
| Q9BVQ7    | Spermatogenesis-associated protein 5-like protein    | SPATA5L1      | 69673000  | 1.587049 |
| P62906    | 60S ribosomal protein L10a                           | RPL10A        | 5.98E+09  | 1.588096 |
| Q9NQ55    | Exosome complex component RRP40                      | EXOSC3        | 523530000 | 1.588164 |
| Q9H0S4    | Probable ATP-dependent RNA helicase DDX47            | DDX47         | 131140000 | 1.596081 |
| Q9NQ55    | Suppressor of SWI4 1 homolog                         | PPAN          | 60524000  | 1.602194 |
| Q16643    | Drebrin                                              | DBN1          | 779510000 | 1.603104 |
| P46976    | Glycogenin-1                                         | GYG1          | 378460000 | 1.606121 |
| O00165    | HCLS1-associated protein X-1                         | HAX1          | 82233000  | 1.607437 |
| Q06587    | E3 ubiquitin-protein ligase RING1                    | RING1         | 60640000  | 1.608745 |
| Q9H0G5    | Nuclear speckle splicing regulatory protein 1        | NSRP1         | 10462000  | 1.614944 |
| O75400    | Pre-mRNA-processing factor 40 homolog A              | PRPF40A       | 606700000 | 1.621157 |
| Q15717    | ELAV-like protein 1                                  | ELAVL1        | 1.224E+09 | 1.623771 |
| Q8IWS0    | PHD finger protein 6                                 | PHF6          | 179950000 | 1.627442 |
| Q9H089    | Large subunit GTPase 1 homolog                       | LSG1          | 143070000 | 1.630966 |
| Q96GQ7    | Probable ATP-dependent RNA helicase DDX27            | DDX27         | 17578000  | 1.631419 |
| Q9BPZ3    | Polyadenylate-binding protein-interacting protein    | PAIP2         | 112790000 | 1.632203 |
| Q9UHB6    | LIM domain and actin-binding protein 1               | LIMA1         | 579770000 | 1.641872 |
| Q8ND56    | Protein LSM14 homolog A                              | LSM14A        | 144070000 | 1.667877 |
| Q7L2E3    | Putative ATP-dependent RNA helicase DHX30            | DHX30         | 1.773E+09 | 1.668949 |
| P46013    | Antigen KI-67                                        | MKI67         | 191130000 | 1.670039 |
| Q9Y2R9    | 28S ribosomal protein S7, mitochondrial              | MRPS7         | 191700000 | 1.673429 |
| P46779    | 60S ribosomal protein L28                            | RPL28         | 3.312E+09 | 1.673453 |
| Q9BVJ6;Q5 | U3 small nucleolar RNA-associated protein 14 hom     | UTP14A;UTP14C | 81051000  | 1.673703 |
| Q9NZB2    | Constitutive coactivator of PPAR-gamma-like prote    | FAM120A       | 688420000 | 1.674042 |
| Q7L5L3    | Glycerophosphodiester phosphodiesterase domair       | GDPD3         | 56581000  | 1.675387 |
| P62244    | 40S ribosomal protein S15a                           | RPS15A        | 6.676E+09 | 1.67555  |
| Q96ER9    | Coiled-coil domain-containing protein 51             | CCDC51        | 95265000  | 1.681879 |
| Q8NI99    | Angiopoietin-related protein 6                       | ANGPTL6       | 37639000  | 1.685861 |
| Q12986    | Transcriptional repressor NF-X1                      | NFX1          | 17109000  | 1.700413 |
| P62913    | 60S ribosomal protein L11                            | RPL11         | 5.103E+09 | 1.700474 |
| Q7Z417    | Nuclear fragile X mental retardation-interacting pr  | NUFIP2        | 1.277E+09 | 1.701115 |
| Q12797    | Aspartyl/asparaginyl beta-hydroxylase                | ASPH          | 4.745E+09 | 1.703332 |
| Q14978    | Nucleolar and coiled-body phosphoprotein 1           | NOLC1         | 922850000 | 1.710831 |
| Q9H0H5    | Rac GTPase-activating protein 1                      | RACGAP1       | 119890000 | 1.714232 |
| Q9HCG8    | Pre-mRNA-splicing factor CWC22 homolog               | CWC22         | 42910000  | 1.714673 |
| P19447    | TFIIH basal transcription factor complex helicase XI | ERCC3         | 61417000  | 1.715379 |
| Q07065    | Cytoskeleton-associated protein 4                    | CKAP4         | 5.679E+09 | 1.715508 |
| P62280    | 40S ribosomal protein S11                            | RPS11         | 2.503E+09 | 1.718004 |

|           |                                                     |                  |           |          |
|-----------|-----------------------------------------------------|------------------|-----------|----------|
| Q9UM22    | Mammalian ependymin-related protein 1               | EPDR1            | 81229000  | 1.71815  |
| Q9BVI4    | Nucleolar complex protein 4 homolog                 | NOC4L            | 137830000 | 1.729998 |
| P25440    | Bromodomain-containing protein 2                    | BRD2             | 130680000 | 1.730606 |
| Q8IYB3    | Serine/arginine repetitive matrix protein 1         | SRRM1            | 813750000 | 1.733505 |
| Q7KZI7    | Serine/threonine-protein kinase MARK2               | MARK2            | 68647000  | 1.736209 |
| O00567    | Nucleolar protein 56                                | NOP56            | 314910000 | 1.736266 |
| Q86UE4    | Protein LYRIC                                       | MTDH             | 1.313E+09 | 1.743593 |
| O75592    | E3 ubiquitin-protein ligase MYCBP2                  | MYCBP2           | 224190000 | 1.748209 |
| Q13868    | Exosome complex component RRP4                      | EXOSC2           | 704830000 | 1.757996 |
| Q9NY61    | Protein AATF                                        | AATF             | 35241000  | 1.759372 |
| Q15075    | Early endosome antigen 1                            | EEA1             | 267880000 | 1.759436 |
| Q9NYL9    | Tropomodulin-3                                      | TMOD3            | 598610000 | 1.761358 |
| Q6UN15    | Pre-mRNA 3-end-processing factor FIP1               | FIP1L1           | 197090000 | 1.76423  |
| Q5T9A4    | ATPase family AAA domain-containing protein 3B      | ATAD3B           | 1.48E+09  | 1.76449  |
| Q15233    | Non-POU domain-containing octamer-binding prot      | NONO             | 6.375E+09 | 1.766732 |
| Q9Y224    | UPF0568 protein C14orf166                           | C14orf166        | 1.036E+09 | 1.768875 |
| Q8TER5    | Rho guanine nucleotide exchange factor 40           | ARHGEF40         | 89788000  | 1.770013 |
| Q9H5V9    | UPF0428 protein CXorf56                             | CXorf56          | 44349000  | 1.773539 |
| Q9BRT6    | Protein LLP homolog                                 | LLPH             | 25412000  | 1.777523 |
| P46777    | 60S ribosomal protein L5                            | RPL5             | 6.617E+09 | 1.778659 |
| Q13242    | Serine/arginine-rich splicing factor 9              | SRSF9            | 243730000 | 1.786017 |
| Q96AG4    | Leucine-rich repeat-containing protein 59           | LRRC59           | 7.91E+09  | 1.789229 |
| Q15287    | RNA-binding protein with serine-rich domain 1       | RNPS1            | 133450000 | 1.793498 |
| Q8IUD2    | ELKS/Rab6-interacting/CAST family member 1          | ERC1             | 200420000 | 1.798395 |
| Q9UJV9    | Probable ATP-dependent RNA helicase DDX41           | DDX41            | 113950000 | 1.814365 |
| Q9H6F5    | Coiled-coil domain-containing protein 86            | CCDC86           | 51766000  | 1.817694 |
| Q16778;P3 | Histone H2B type 2-E;Histone H2B type 1-B;Histon    | HIST2H2BE;HIST1H | 83871000  | 1.821616 |
| P26373    | 60S ribosomal protein L13                           | RPL13            | 7.588E+09 | 1.82279  |
| P62995    | Transformer-2 protein homolog beta                  | TRA2B            | 573130000 | 1.8248   |
| Q99880;Q9 | Histone H2B type 1-L;Histone H2B type 1-M;Histon    | HIST1H2BL;HIST1H | 7.155E+09 | 1.826912 |
| Q92743    | Serine protease HTRA1                               | HTRA1            | 33707000  | 1.83449  |
| Q5RKV6    | Exosome complex component MTR3                      | EXOSC6           | 670340000 | 1.840378 |
| Q9NYF8    | Bcl-2-associated transcription factor 1             | BCLAF1           | 205250000 | 1.843807 |
| Q55W79    | Centrosomal protein of 170 kDa                      | CEP170           | 1.088E+09 | 1.844717 |
| O15446    | DNA-directed RNA polymerase I subunit RPA34         | CD3EAP           | 100940000 | 1.845651 |
| Q9UEU0    | Vesicle transport through interaction with t-SNARE  | VTI1B            | 136390000 | 1.860543 |
| Q9BW60    | Elongation of very long chain fatty acids protein 1 | ELOVL1           | 101320000 | 1.861143 |
| P38159;Q9 | RNA-binding motif protein, X chromosome;RNA-bi      | RBMX;RBMXL1      | 1.257E+09 | 1.863475 |
| O75569    | Interferon-inducible double-stranded RNA-depend     | PRKRA            | 206000000 | 1.86355  |
| Q5UIP0    | Telomere-associated protein RIF1                    | RIF1             | 374590000 | 1.866992 |
| P09496    | Clathrin light chain A                              | CLTA             | 97553000  | 1.867394 |
| Q6P5R6    | 60S ribosomal protein L22-like 1                    | RPL22L1          | 2.142E+09 | 1.871462 |
| Q07020    | 60S ribosomal protein L18                           | RPL18            | 8.067E+09 | 1.875762 |
| Q70Z53    | Protein FRA10AC1                                    | FRA10AC1         | 33955000  | 1.875992 |
| P52272    | Heterogeneous nuclear ribonucleoprotein M           | HNRNPM           | 1.056E+10 | 1.878543 |
| O00206    | Toll-like receptor 4                                | TLR4             | 282320000 | 1.889157 |
| P46020    | Phosphorylase b kinase regulatory subunit alpha, s  | PHKA1            | 18515000  | 1.897378 |
| P46778    | 60S ribosomal protein L21                           | RPL21            | 4.223E+09 | 1.89904  |
| P23246    | Splicing factor, proline- and glutamine-rich        | SFPQ             | 8.996E+09 | 1.900787 |
| P62750    | 60S ribosomal protein L23a                          | RPL23A           | 5.112E+09 | 1.902039 |

|           |                                                         |             |           |          |
|-----------|---------------------------------------------------------|-------------|-----------|----------|
| P11441    | Ubiquitin-like protein 4A                               | UBL4A       | 74810000  | 1.902051 |
| O43633    | Charged multivesicular body protein 2a                  | CHMP2A      | 177310000 | 1.902239 |
| Q92841    | Probable ATP-dependent RNA helicase DDX17               | DDX17       | 4.257E+09 | 1.908861 |
| P49790    | Nuclear pore complex protein Nup153                     | NUP153      | 98715000  | 1.919322 |
| P47914    | 60S ribosomal protein L29                               | RPL29       | 2.036E+09 | 1.919351 |
| Q9H0U9    | Testis-specific Y-encoded-like protein 1                | TSPYL1      | 26153000  | 1.919762 |
| A2A3N6    | Putative PIP5K1A and PSMD4-like protein                 | PIPSL       | 28101000  | 1.920043 |
| P18124    | 60S ribosomal protein L7                                | RPL7        | 1.65E+10  | 1.927603 |
| Q7RTP6    | Protein-methionine sulfoxide oxidase MICAL3             | MICAL3      | 96987000  | 1.932067 |
| P02545    | Prelamin-A/C;Lamin-A/C                                  | LMNA        | 7.284E+09 | 1.932803 |
| P30050    | 60S ribosomal protein L12                               | RPL12       | 7.702E+09 | 1.936532 |
| Q12899    | Tripartite motif-containing protein 26                  | TRIM26      | 6914000   | 1.944646 |
| P18621    | 60S ribosomal protein L17                               | RPL17       | 4.905E+09 | 1.947942 |
| Q53EZ4    | Centrosomal protein of 55 kDa                           | CEP55       | 75609000  | 1.951609 |
| P22061    | Protein-L-isoaspartate(D-aspartate) O-methyltrans PCMT1 | PCMT1       | 4.282E+09 | 1.953089 |
| P50914    | 60S ribosomal protein L14                               | RPL14       | 4.442E+09 | 1.954075 |
| Q9H6R4    | Nucleolar protein 6                                     | NOL6        | 144160000 | 1.967239 |
| Q6VMQ6    | Activating transcription factor 7-interacting protein   | ATF7IP      | 62654000  | 1.976028 |
| P17844    | Probable ATP-dependent RNA helicase DDX5                | DDX5        | 4.942E+09 | 1.98294  |
| Q49A26    | Putative oxidoreductase GLYR1                           | GLYR1       | 12203000  | 1.993675 |
| Q9Y5Q8    | General transcription factor 3C polypeptide 5           | GTF3C5      | 140260000 | 1.994333 |
| Q9NW13    | RNA-binding protein 28                                  | RBM28       | 378510000 | 1.994744 |
| P62316    | Small nuclear ribonucleoprotein Sm D2                   | SNRPD2      | 2.223E+09 | 1.998774 |
| Q96C57    | Uncharacterized protein C12orf43                        | C12orf43    | 116370000 | 1.999298 |
| Q15646    | 2-5-oligoadenylate synthase-like protein                | OASL        | 126610000 | 2.014627 |
| Q96I25    | Splicing factor 45                                      | RBM17       | 234770000 | 2.019956 |
| P43235    | Cathepsin K                                             | CTSK        | 6780700   | 2.031905 |
| P61353    | 60S ribosomal protein L27                               | RPL27       | 5.148E+09 | 2.032346 |
| P56182    | Ribosomal RNA processing protein 1 homolog A            | RRP1        | 158410000 | 2.035959 |
| Q9NVP1    | ATP-dependent RNA helicase DDX18                        | DDX18       | 356890000 | 2.037424 |
| Q14690    | Protein RRP5 homolog                                    | PDCD11      | 150570000 | 2.044461 |
| Q9BQ39    | ATP-dependent RNA helicase DDX50                        | DDX50       | 220820000 | 2.044498 |
| P35268    | 60S ribosomal protein L22                               | RPL22       | 2.128E+09 | 2.047401 |
| Q9Y4C8    | Probable RNA-binding protein 19                         | RBM19       | 60235000  | 2.059061 |
| P61254    | 60S ribosomal protein L26                               | RPL26       | 2.37E+09  | 2.060317 |
| Q8N999    | Uncharacterized protein C12orf29                        | C12orf29    | 75137000  | 2.065913 |
| Q5T2N8    | ATPase family AAA domain-containing protein 3C          | ATAD3C      | 21083000  | 2.066337 |
| Q9H0A0    | N-acetyltransferase 10                                  | NAT10       | 848800000 | 2.071503 |
| Q96QR8    | Transcriptional activator protein Pur-beta              | PURB        | 197350000 | 2.077594 |
| P29558;Q1 | RNA-binding motif, single-stranded-interacting protein  | RBMS1;RBMS2 | 27120000  | 2.083796 |
| P16989    | Y-box-binding protein 3                                 | YBX3        | 1.338E+09 | 2.088213 |
| Q9NY12    | H/ACA ribonucleoprotein complex subunit 1               | GAR1        | 13671000  | 2.092197 |
| Q9BY77    | Polymerase delta-interacting protein 3                  | POLDIP3     | 224000000 | 2.095232 |
| Q8N9T8    | Protein KRI1 homolog                                    | KRI1        | 41674000  | 2.096718 |
| O43159    | Ribosomal RNA-processing protein 8                      | RRP8        | 10204000  | 2.101005 |
| P51991    | Heterogeneous nuclear ribonucleoprotein A3              | HNRNPA3     | 3.838E+09 | 2.10146  |
| Q3KQU3    | MAP7 domain-containing protein 1                        | MAP7D1      | 285250000 | 2.103333 |
| P62805    | Histone H4                                              | HIST1H4A    | 2.755E+09 | 2.104813 |
| Q9NTJ5    | Phosphatidylinositol phosphatase SAC1                   | SACM1L      | 4.729E+09 | 2.106547 |
| Q9NUL3    | Double-stranded RNA-binding protein Staufen homolog     | STAU2       | 37849000  | 2.114965 |

|           |                                                                                                   |                |           |          |
|-----------|---------------------------------------------------------------------------------------------------|----------------|-----------|----------|
| E9PRG8    | Uncharacterized protein C11orf98                                                                  | C11orf98       | 119080000 | 2.126787 |
| P49207    | 60S ribosomal protein L34                                                                         | RPL34          | 2.397E+09 | 2.127032 |
| O75970    | Multiple PDZ domain protein                                                                       | MPDZ           | 41533000  | 2.13265  |
| Q9HAU5    | Regulator of nonsense transcripts 2                                                               | UPF2           | 149610000 | 2.136502 |
| P84243;Q7 | Histone H3.3;Histone H3.2;Histone H3.1t;Histone H3.1;Histone H3.2t;Histone H3.3t;H3F3A;HIST2H3A;t |                | 777340000 | 2.136603 |
| Q9Y6H1;Q5 | Coiled-coil-helix-coiled-coil-helix domain-containing protein 2                                   | CHCHD2;CHCHD2F | 501520000 | 2.14848  |
| Q96BW9    | Phosphatidate cytidyltransferase, mitochondrial                                                   | TAMM41         | 67225000  | 2.151275 |
| Q9H0D6    | 5-3 exoribonuclease 2                                                                             | XRN2           | 1.138E+09 | 2.153174 |
| Q15633    | RISC-loading complex subunit TARBP2                                                               | TARBP2         | 33707000  | 2.160244 |
| P04792    | Heat shock protein beta-1                                                                         | HSPB1          | 5.474E+09 | 2.1619   |
| P04040    | Catalase                                                                                          | CAT            | 5.266E+10 | 2.165107 |
| Q03701    | CCAAT/enhancer-binding protein zeta                                                               | CEBPZ          | 194210000 | 2.186718 |
| P16403    | Histone H1.2                                                                                      | HIST1H1C       | 1.97E+09  | 2.190734 |
| O95400    | CD2 antigen cytoplasmic tail-binding protein 2                                                    | CD2BP2         | 522400000 | 2.191367 |
| Q9Y3U8    | 60S ribosomal protein L36                                                                         | RPL36          | 1.056E+09 | 2.199109 |
| P62899    | 60S ribosomal protein L31                                                                         | RPL31          | 5.922E+09 | 2.203712 |
| Q9Y3Y2    | Chromatin target of PRMT1 protein                                                                 | CHTOP          | 134110000 | 2.214762 |
| Q6FI81    | Anamorsin                                                                                         | CIAPIN1        | 1.928E+09 | 2.216503 |
| Q9Y5A9    | YTH domain-containing family protein 2                                                            | YTHDF2         | 328710000 | 2.220688 |
| Q96CT7    | Coiled-coil domain-containing protein 124                                                         | CCDC124        | 838180000 | 2.220925 |
| Q14331    | Protein FRG1                                                                                      | FRG1           | 52814000  | 2.222185 |
| P19838    | Nuclear factor NF-kappa-B p105 subunit;Nuclear factor kappa-B subunit 1                           | NFKB1          | 112560000 | 2.224215 |
| P98175    | RNA-binding protein 10                                                                            | RBM10          | 222850000 | 2.232014 |
| P42766    | 60S ribosomal protein L35                                                                         | RPL35          | 3.87E+09  | 2.232353 |
| P42166    | Lamina-associated polypeptide 2, isoform alpha;Tf                                                 | TMPO           | 1.617E+09 | 2.234158 |
| P62917    | 60S ribosomal protein L8                                                                          | RPL8           | 5.478E+09 | 2.238649 |
| O43251;Q9 | RNA binding protein fox-1 homolog 2;RNA binding protein 2                                         | RBFOX2;RBFOX1  | 81029000  | 2.242927 |
| P62987;P0 | Ubiquitin-60S ribosomal protein L40;Ubiquitin;60S ribosomal protein L40                           | UBA52;UBB;UBC  | 2.857E+09 | 2.246078 |
| P78316    | Nucleolar protein 14                                                                              | NOP14          | 104310000 | 2.252969 |
| O75223    | Gamma-glutamylcyclotransferase                                                                    | GGCT           | 352380000 | 2.256376 |
| Q9Y3B9    | RRP15-like protein                                                                                | RRP15          | 46342000  | 2.270189 |
| Q9Y2W1    | Thyroid hormone receptor-associated protein 3                                                     | THRAP3         | 367810000 | 2.283598 |
| O76021    | Ribosomal L1 domain-containing protein 1                                                          | RSL1D1         | 1.229E+09 | 2.305123 |
| P67809    | Nuclease-sensitive element-binding protein 1                                                      | YBX1           | 8.578E+09 | 2.312258 |
| Q86XZ4    | Spermatogenesis-associated serine-rich protein 2                                                  | SPATS2         | 181590000 | 2.315778 |
| Q1ED39    | Lysine-rich nucleolar protein 1                                                                   | KNOP1          | 14152000  | 2.316589 |
| Q14444    | Caprin-1                                                                                          | CAPRIN1        | 2.902E+09 | 2.316818 |
| Q9HCE1    | Putative helicase MOV-10                                                                          | MOV10          | 800250000 | 2.324659 |
| O43464    | Serine protease HTRA2, mitochondrial                                                              | HTRA2          | 289920000 | 2.329951 |
| P29323    | Ephrin type-B receptor 2                                                                          | EPHB2          | 223440000 | 2.330609 |
| Q5T3I0    | G patch domain-containing protein 4                                                               | GPATCH4        | 163190000 | 2.333574 |
| Q14684    | Ribosomal RNA processing protein 1 homolog B                                                      | RRP1B          | 323790000 | 2.335986 |
| O95793    | Double-stranded RNA-binding protein Staufen homolog 1                                             | STAU1          | 999300000 | 2.340561 |
| P83731    | 60S ribosomal protein L24                                                                         | RPL24          | 4.644E+09 | 2.366572 |
| Q14694    | Ubiquitin carboxyl-terminal hydrolase 10                                                          | USP10          | 273210000 | 2.369507 |
| Q9UJX5    | Anaphase-promoting complex subunit 4                                                              | ANAPC4         | 271080000 | 2.398884 |
| Q07955    | Serine/arginine-rich splicing factor 1                                                            | SRSF1          | 1.768E+09 | 2.40063  |
| Q9BWE0    | Replication initiator 1                                                                           | REPIN1         | 24228000  | 2.401183 |
| Q9Y3C1    | Nucleolar protein 16                                                                              | NOP16          | 38109000  | 2.40504  |
| O75330    | Hyaluronan mediated motility receptor                                                             | HMMR           | 77731000  | 2.415949 |



|        |                                                      |           |           |          |
|--------|------------------------------------------------------|-----------|-----------|----------|
| Q5T5P2 | Sickle tail protein homolog                          | KIAA1217  | 431770000 | 2.419373 |
| P05387 | 60S acidic ribosomal protein P2                      | RPLP2     | 2.359E+09 | 2.422696 |
| P38646 | Stress-70 protein, mitochondrial                     | HSPA9     | 4.481E+10 | 2.427241 |
| Q9UKJ3 | G patch domain-containing protein 8                  | GPATCH8   | 127020000 | 2.4332   |
| Q9Y2X3 | Nucleolar protein 58                                 | NOP58     | 413700000 | 2.435316 |
| Q9BUB5 | MAP kinase-interacting serine/threonine-protein k    | MKNK1     | 201220000 | 2.442631 |
| P14373 | Zinc finger protein RFP                              | TRIM27    | 54081000  | 2.46315  |
| Q00577 | Transcriptional activator protein Pur-alpha          | PURA      | 650860000 | 2.476588 |
| Q9BZE4 | Nucleolar GTP-binding protein 1                      | GTPBP4    | 619090000 | 2.48072  |
| P46087 | Probable 28S rRNA (cytosine(4447)-C(5))-methyltr     | NOP2      | 829490000 | 2.49056  |
| P46100 | Transcriptional regulator ATRX                       | ATRX      | 38868000  | 2.545439 |
| Q9Y2I8 | WD repeat-containing protein 37                      | WDR37     | 106850000 | 2.550504 |
| Q13573 | SNW domain-containing protein 1                      | SNW1      | 489040000 | 2.59127  |
| P11388 | DNA topoisomerase 2-alpha                            | TOP2A     | 104730000 | 2.593561 |
| P55265 | Double-stranded RNA-specific adenosine deamina       | ADAR      | 251870000 | 2.635287 |
| Q9UJX3 | Anaphase-promoting complex subunit 7                 | ANAPC7    | 244660000 | 2.643758 |
| Q14651 | Plastin-1                                            | PLS1      | 131500000 | 2.651843 |
| P54802 | Alpha-N-acetylglucosaminidase;Alpha-N-acetylgluc     | NAGLU     | 33843000  | 2.660004 |
| Q9UN86 | Ras GTPase-activating protein-binding protein 2      | G3BP2     | 735880000 | 2.66095  |
| Q8IX01 | SURP and G-patch domain-containing protein 2         | SUGP2     | 257790000 | 2.670349 |
| Q9ULV4 | Coronin-1C                                           | CORO1C    | 4.689E+09 | 2.671374 |
| P08651 | Nuclear factor 1 C-type                              | NFIC      | 44070000  | 2.681731 |
| Q00059 | Transcription factor A, mitochondrial                | TFAM      | 145540000 | 2.683724 |
| Q6PK04 | Coiled-coil domain-containing protein 137            | CCDC137   | 16186000  | 2.689691 |
| O43290 | U4/U6.U5 tri-snRNP-associated protein 1              | SART1     | 415690000 | 2.714025 |
| P48729 | Casein kinase I isoform alpha                        | CSNK1A1   | 395000000 | 2.726248 |
| Q9BRJ6 | Uncharacterized protein C7orf50                      | C7orf50   | 330040000 | 2.733649 |
| Q9Y2R4 | Probable ATP-dependent RNA helicase DDX52            | DDX52     | 40854000  | 2.748031 |
| Q8NCA5 | Protein FAM98A                                       | FAM98A    | 527470000 | 2.806683 |
| P61513 | 60S ribosomal protein L37a                           | RPL37A    | 613010000 | 2.829505 |
| Q99459 | Cell division cycle 5-like protein                   | CDC5L     | 959710000 | 2.83403  |
| A6NHR9 | Structural maintenance of chromosomes flexible h     | SMCHD1    | 344230000 | 2.83872  |
| Q9NX58 | Cell growth-regulating nucleolar protein             | LYAR      | 796950000 | 2.853744 |
| Q99848 | Probable rRNA-processing protein EBP2                | EBNA1BP2  | 302800000 | 2.861214 |
| P50402 | Emerin                                               | EMD       | 833910000 | 2.87117  |
| P43243 | Matrin-3                                             | MATR3     | 3.584E+09 | 2.882443 |
| Q66PJ3 | ADP-ribosylation factor-like protein 6-interacting p | ARL6IP4   | 171120000 | 2.890182 |
| O00178 | GTP-binding protein 1                                | GTPBP1    | 615700000 | 2.907024 |
| Q13867 | Bleomycin hydrolase                                  | BLMH      | 1.11E+09  | 2.907276 |
| Q6WKZ4 | Rab11 family-interacting protein 1                   | RAB11FIP1 | 108000000 | 2.922746 |
| Q9NX24 | H/ACA ribonucleoprotein complex subunit 2            | NHP2      | 36346000  | 2.933556 |
| Q9UJX4 | Anaphase-promoting complex subunit 5                 | ANAPC5    | 173370000 | 2.950585 |
| Q5MNZ9 | WD repeat domain phosphoinositide-interacting p      | WIP1      | 450750000 | 2.951847 |
| Q9BPX7 | UPF0415 protein C7orf25                              | C7orf25   | 7305400   | 2.954304 |
| Q9Y520 | Protein PRRC2C                                       | PRRC2C    | 1.413E+09 | 3.002486 |
| Q9BVS4 | Serine/threonine-protein kinase RIO2                 | RIOK2     | 173680000 | 3.00561  |
| Q8TDN6 | Ribosome biogenesis protein BRX1 homolog             | BRX1      | 577480000 | 3.00689  |
| Q9UKG1 | DCC-interacting protein 13-alpha                     | APPL1     | 550860000 | 3.011066 |
| O14974 | Protein phosphatase 1 regulatory subunit 12A         | PPP1R12A  | 445400000 | 3.022295 |
| Q15050 | Ribosome biogenesis regulatory protein homolog       | RRS1      | 90407000  | 3.02443  |

|           |                                                                             |         |           |          |
|-----------|-----------------------------------------------------------------------------|---------|-----------|----------|
| P51114    | Fragile X mental retardation syndrome-related pro FXR1                      |         | 2.212E+09 | 3.030866 |
| P08670    | Vimentin                                                                    | VIM     | 1.338E+10 | 3.042313 |
| O94964    | Protein SOGA1;N-terminal form;C-terminal 80 kDa SOGA1                       |         | 121870000 | 3.043707 |
| Q9H1A4    | Anaphase-promoting complex subunit 1                                        | ANAPC1  | 477610000 | 3.064478 |
| Q9UHD2    | Serine/threonine-protein kinase TBK1                                        | TBK1    | 664530000 | 3.068334 |
| Q9Y608    | Leucine-rich repeat flightless-interacting protein 2                        | LRRFIP2 | 138350000 | 3.086521 |
| P27448    | MAP/microtubule affinity-regulating kinase 3                                | MARK3   | 35553000  | 3.086684 |
| P16152    | Carbonyl reductase [NADPH] 1                                                | CBR1    | 8.961E+09 | 3.103467 |
| Q96KG9    | N-terminal kinase-like protein                                              | SCYL1   | 1.199E+09 | 3.113649 |
| P07910;A0 | Heterogeneous nuclear ribonucleoproteins C1/C2; HNRNPC;HNRNPC1              |         | 5.595E+09 | 3.123294 |
| Q92804    | TATA-binding protein-associated factor 2N                                   | TAF15   | 491530000 | 3.132379 |
| Q9ULW0    | Targeting protein for Xklp2                                                 | TPX2    | 33567000  | 3.158279 |
| P42696    | RNA-binding protein 34                                                      | RBM34   | 72035000  | 3.160683 |
| Q9HAN9    | Nicotinamide/nicotinic acid mononucleotide adenyl                           | NMNAT1  | 184810000 | 3.168322 |
| O95479    | GDH/6PGL endoplasmic bifunctional protein;Glucose 6-phosphate dehydrogenase | H6PD    | 38325000  | 3.183254 |
| Q8WVF5    | BTB/POZ domain-containing protein KCTD4                                     | KCTD4   | 99151000  | 3.199171 |
| Q06787    | Fragile X mental retardation protein 1                                      | FMR1    | 403840000 | 3.213306 |
| P38935    | DNA-binding protein SMUBP-2                                                 | IGHMBP2 | 24697000  | 3.221368 |
| Q9NYJ8    | TGF-beta-activated kinase 1 and MAP3K7-binding protein 1                    | TAB2    | 34087000  | 3.225234 |
| Q6WCQ1    | Myosin phosphatase Rho-interacting protein                                  | MPRIP   | 1.097E+09 | 3.265974 |
| P12814    | Alpha-actinin-1                                                             | ACTN1   | 9.639E+09 | 3.299655 |
| Q9H4K7    | Mitochondrial ribosome-associated GTPase 2                                  | MTG2    | 22044000  | 3.34028  |
| Q9H6W3    | Bifunctional lysine-specific demethylase and histone demethylase            | NO66    | 9971300   | 3.340411 |
| P51116    | Fragile X mental retardation syndrome-related pro FXR2                      |         | 750390000 | 3.356977 |
| O95453    | Poly(A)-specific ribonuclease PARN                                          | PARN    | 149900000 | 3.365007 |
| Q9UDY2    | Tight junction protein ZO-2                                                 | TJP2    | 2.318E+09 | 3.455966 |
| O95425    | Supervillin                                                                 | SVIL    | 28220000  | 3.473601 |
| O94875    | Sorbin and SH3 domain-containing protein 2                                  | SORBS2  | 20503000  | 3.485524 |
| Q13813    | Spectrin alpha chain, non-erythrocytic 1                                    | SPTAN1  | 5.045E+09 | 3.493301 |
| Q8IY81    | pre-rRNA processing protein FTSJ3                                           | FTSJ3   | 479070000 | 3.512954 |
| Q7Z6B7    | SLIT-ROBO Rho GTPase-activating protein 1                                   | SRGAP1  | 94381000  | 3.562448 |
| Q99873    | Protein arginine N-methyltransferase 1                                      | PRMT1   | 4.722E+09 | 3.701188 |
| Q9H307    | Pinin                                                                       | PNN     | 448800000 | 3.7256   |
| Q9ULQ1    | Two pore calcium channel protein 1                                          | TPCN1   | 15526000  | 3.778606 |
| Q9UKM9    | RNA-binding protein Raly                                                    | RALY    | 270190000 | 3.808557 |
| Q96CX2    | BTB/POZ domain-containing protein KCTD12                                    | KCTD12  | 2.153E+09 | 3.813539 |
| P30260    | Cell division cycle protein 27 homolog                                      | CDC27   | 539910000 | 3.849701 |
| P83111    | Serine beta-lactamase-like protein LACTB, mitochondrial                     | LACTB   | 191610000 | 3.86001  |
| O75145    | Liprin-alpha-3                                                              | PPFIA3  | 252740000 | 3.956597 |
| P35580    | Myosin-10                                                                   | MYH10   | 8.469E+09 | 3.991994 |
| Q7Z4L5    | Tetratricopeptide repeat protein 21B                                        | TTC21B  | 114170000 | 4.046948 |
| O75044    | SLIT-ROBO Rho GTPase-activating protein 2                                   | SRGAP2  | 124910000 | 4.05977  |
| Q8N806    | Putative E3 ubiquitin-protein ligase UBR7                                   | UBR7    | 1.104E+09 | 4.132703 |
| O75828    | Carbonyl reductase [NADPH] 3                                                | CBR3    | 2.042E+09 | 4.135369 |
| Q8IY37    | Probable ATP-dependent RNA helicase DHX37                                   | DHX37   | 62890000  | 4.168421 |
| Q69YQ0    | Cytospin-A                                                                  | SPECC1L | 401500000 | 4.222877 |
| Q5M775    | Cytospin-B                                                                  | SPECC1  | 86691000  | 4.242875 |
| P78347    | General transcription factor II-I                                           | GTF2I   | 9.015E+09 | 4.270077 |
| Q9UQ35    | Serine/arginine repetitive matrix protein 2                                 | SRRM2   | 1.778E+09 | 4.311073 |
| Q8TD55    | Pleckstrin homology domain-containing family O member 2                     | PLEKHO2 | 206790000 | 4.34207  |

|            |                                                         |                  |           |          |
|------------|---------------------------------------------------------|------------------|-----------|----------|
| Q9BQS8     | FYVE and coiled-coil domain-containing protein 1        | FYCO1            | 460050000 | 4.360571 |
| Q86V48     | Leucine zipper protein 1                                | LUZP1            | 39967000  | 4.380927 |
| P29508;P44 | Serpin B3;Serpin B4                                     | SERPINB3;SERPINE | 113980000 | 4.389839 |
| Q9NVR0     | Kelch-like protein 11                                   | KLHL11           | 189620000 | 4.396562 |
| O95218     | Zinc finger Ran-binding domain-containing protein       | ZRANB2           | 427660000 | 4.439041 |
| Q07157     | Tight junction protein ZO-1                             | TJP1             | 631030000 | 4.50253  |
| Q8WVV4     | Protein POF1B                                           | POF1B            | 47421000  | 4.669363 |
| P83881     | 60S ribosomal protein L36a                              | RPL36A           | 215150000 | 4.732743 |
| Q9UI42     | Carboxypeptidase A4                                     | CPA4             | 68129000  | 4.754822 |
| P17302     | Gap junction alpha-1 protein                            | GJA1             | 233450000 | 4.799272 |
| Q7L5D6     | Golgi to ER traffic protein 4 homolog                   | GET4             | 941620000 | 4.851023 |
| P83916     | Chromobox protein homolog 1                             | CBX1             | 259210000 | 4.933376 |
| A6ND36     | Protein FAM83G                                          | FAM83G           | 371690000 | 5.298068 |
| Q9BRK4     | Leucine zipper putative tumor suppressor 2              | LZTS2            | 75210000  | 5.33998  |
| Q8IUR6     | CREB3 regulatory factor                                 | CREBRF           | 67438000  | 5.365834 |
| Q8TAA9     | Vang-like protein 1                                     | VANGL1           | 82151000  | 5.509439 |
| Q9UQ03     | Coronin-2B                                              | CORO2B           | 82264000  | 5.608199 |
| P81605     | Dermcidin;Survival-promoting peptide;DCD-1              | DCD              | 670380000 | 5.685468 |
| P46379     | Large proline-rich protein BAG6                         | BAG6             | 3.846E+09 | 5.806973 |
| P60006     | Anaphase-promoting complex subunit 15                   | ANAPC15          | 4507400   | 5.899496 |
| Q9UJX2     | Cell division cycle protein 23 homolog                  | CDC23            | 138960000 | 6.033636 |
| P35908     | Keratin, type II cytoskeletal 2 epidermal               | KRT2             | 2.912E+10 | 6.156368 |
| Q5BKY9     | Protein FAM133B                                         | FAM133B          | 26705000  | 6.512067 |
| O60783     | 28S ribosomal protein S14, mitochondrial                | MRPS14           | 591540000 | 6.521307 |
| Q02413     | Desmoglein-1                                            | DSG1             | 409370000 | 6.62297  |
| P14923     | Junction plakoglobin                                    | JUP              | 305790000 | 6.714096 |
| P15924     | Desmoplakin                                             | DSP              | 1.471E+09 | 6.74599  |
| P00736     | Complement C1r subcomponent;Complement C1r              | C1R              | 116490000 | 6.77378  |
| Q5T749     | Keratinocyte proline-rich protein                       | KPRP             | 39765000  | 6.785657 |
| Q13042     | Cell division cycle protein 16 homolog                  | CDC16            | 375580000 | 6.858132 |
| Q9Y4B5     | Microtubule cross-linking factor 1                      | MTCL1            | 59784000  | 7.232892 |
| Q6UWP8     | Suprabasin                                              | SBSN             | 39201000  | 7.23423  |
| Q92844     | TRAF family member-associated NF-kappa-B activator      | TANK             | 105820000 | 7.447244 |
| P06312     | Ig kappa chain V-IV region                              | IGKV4-1          | 140440000 | 7.736079 |
| Q08554     | Desmocollin-1                                           | DSC1             | 111390000 | 7.771449 |
| P28799     | Granulins;Acrogranin;Paragranulin;Granulin-1;Grar       | GRN              | 326620000 | 8.112904 |
| Q9NZT1     | Calmodulin-like protein 5                               | CALML5           | 624150000 | 8.227778 |
| P31944     | Caspase-14;Caspase-14 subunit p17, mature form;         | CASP14           | 331480000 | 8.816134 |
| Q8IWB9     | Testis-expressed sequence 2 protein                     | TEX2             | 427770000 | 9.149067 |
| P40145     | Adenylate cyclase type 8                                | ADCY8            | 497780000 | 9.775896 |
| P19474     | E3 ubiquitin-protein ligase TRIM21                      | TRIM21           | 800570000 | 10.72909 |
| Q7Z2W7     | Transient receptor potential cation channel subfamily 8 | TRPM8            | 629030000 | 10.96603 |
| P25311     | Zinc-alpha-2-glycoprotein                               | AZGP1            | 275930000 | 11.34477 |
| P01857;P01 | Ig gamma-1 chain C region;Ig gamma-3 chain C region     | IGHG1;IGHG3      | 3.028E+10 | 16.25345 |
| P07942     | Laminin subunit beta-1                                  | LAMB1            | 4.635E+10 | INFINITE |
| Q6NSI4     | Uncharacterized protein CXorf57                         | CXorf57          | 9.631E+09 | INFINITE |
| Q96QH2     | PML-RARA-regulated adapter molecule 1                   | PRAM1            | 9.546E+09 | INFINITE |
| A8K2U0     | Alpha-2-macroglobulin-like protein 1                    | A2ML1            | 8.067E+09 | INFINITE |
| P07954     | Fumarate hydratase, mitochondrial                       | FH               | 7.554E+09 | INFINITE |
| P54577     | Tyrosine--tRNA ligase, cytoplasmic;Tyrosine--tRNA       | YARS             | 6.953E+09 | INFINITE |

|           |                                                     |             |           |          |
|-----------|-----------------------------------------------------|-------------|-----------|----------|
| P78417    | Glutathione S-transferase omega-1                   | GSTO1       | 5.237E+09 | INFINITE |
| O15067    | Phosphoribosylformylglycinamide synthase            | PFAS        | 3.507E+09 | INFINITE |
| Q02818    | Nucleobindin-1                                      | NUCB1       | 3.332E+09 | INFINITE |
| Q9P287    | BRCA2 and CDKN1A-interacting protein                | BCCIP       | 3.182E+09 | INFINITE |
| Q9Y617    | Phosphoserine aminotransferase                      | PSAT1       | 3.099E+09 | INFINITE |
| P09936    | Ubiquitin carboxyl-terminal hydrolase isozyme L1    | UCHL1       | 2.887E+09 | INFINITE |
| P09960    | Leukotriene A-4 hydrolase                           | LTA4H       | 2.772E+09 | INFINITE |
| Q9UBE0    | SUMO-activating enzyme subunit 1;SUMO-activati      | SAE1        | 2.551E+09 | INFINITE |
| Q04446    | 1,4-alpha-glucan-branching enzyme                   | GBE1        | 2.463E+09 | INFINITE |
| O94979    | Protein transport protein Sec31A                    | SEC31A      | 2.436E+09 | INFINITE |
| Q9BTT0    | Acidic leucine-rich nuclear phosphoprotein 32 fam   | ANP32E      | 2.414E+09 | INFINITE |
| P01834    | Ig kappa chain C region                             | IGKC        | 2.388E+09 | INFINITE |
| Q15435    | Protein phosphatase 1 regulatory subunit 7          | PPP1R7      | 2.358E+09 | INFINITE |
| Q14166    | Tubulin--tyrosine ligase-like protein 12            | TTL12       | 2.342E+09 | INFINITE |
| P21399    | Cytoplasmic aconitate hydratase                     | ACO1        | 2.327E+09 | INFINITE |
| Q92597    | Protein NDRG1                                       | NDRG1       | 2.174E+09 | INFINITE |
| A6NJG6    | Arginine-fifty homeobox                             | ARGFX       | 2.113E+09 | INFINITE |
| Q15257    | Serine/threonine-protein phosphatase 2A activato    | PPP2R4      | 2.073E+09 | INFINITE |
| P31150    | Rab GDP dissociation inhibitor alpha                | GDI1        | 2.018E+09 | INFINITE |
| O96008    | Mitochondrial import receptor subunit TOM40 hor     | TOMM40      | 1.914E+09 | INFINITE |
| Q15813    | Tubulin-specific chaperone E                        | TBCE        | 1.89E+09  | INFINITE |
| P53004    | Biliverdin reductase A                              | BLVRA       | 1.816E+09 | INFINITE |
| Q9UBQ7    | Glyoxylate reductase/hydroxypyruvate reductase      | GRHPR       | 1.783E+09 | INFINITE |
| O75153    | Clustered mitochondria protein homolog              | CLUH        | 1.781E+09 | INFINITE |
| P30837    | Aldehyde dehydrogenase X, mitochondrial             | ALDH1B1     | 1.716E+09 | INFINITE |
| P31040    | Succinate dehydrogenase [ubiquinone] flavoprotei    | SDHA        | 1.631E+09 | INFINITE |
| O75347    | Tubulin-specific chaperone A                        | TBCA        | 1.629E+09 | INFINITE |
| P0DN79;P3 | Cystathionine beta-synthase                         | CBS         | 1.598E+09 | INFINITE |
| P16435    | NADPH--cytochrome P450 reductase                    | POR         | 1.582E+09 | INFINITE |
| Q9NUU7    | ATP-dependent RNA helicase DDX19A                   | DDX19A      | 1.573E+09 | INFINITE |
| Q99598    | Translin-associated protein X                       | TSNAX       | 1.555E+09 | INFINITE |
| O60271    | C-Jun-amino-terminal kinase-interacting protein 4   | SPAG9       | 1.539E+09 | INFINITE |
| P19623    | Spermidine synthase                                 | SRM         | 1.511E+09 | INFINITE |
| P05091    | Aldehyde dehydrogenase, mitochondrial               | ALDH2       | 1.503E+09 | INFINITE |
| Q14019    | Coactosin-like protein                              | COTL1       | 1.492E+09 | INFINITE |
| Q13126    | S-methyl-5-thioadenosine phosphorylase              | MTAP        | 1.489E+09 | INFINITE |
| Q14914    | Prostaglandin reductase 1                           | PTGR1       | 1.48E+09  | INFINITE |
| Q10567    | AP-1 complex subunit beta-1                         | AP1B1       | 1.445E+09 | INFINITE |
| O14929    | Histone acetyltransferase type B catalytic subunit  | HAT1        | 1.407E+09 | INFINITE |
| P49753;Q8 | Acyl-coenzyme A thioesterase 2, mitochondrial;Ac    | ACOT2;ACOT1 | 1.388E+09 | INFINITE |
| P48147    | Prolyl endopeptidase                                | PREP        | 1.372E+09 | INFINITE |
| Q86UE8    | Serine/threonine-protein kinase tousled-like 2      | TLK2        | 1.319E+09 | INFINITE |
| Q9BRX8    | Redox-regulatory protein FAM213A                    | FAM213A     | 1.318E+09 | INFINITE |
| Q9HB07    | UPF0160 protein MYG1, mitochondrial                 | C12orf10    | 1.298E+09 | INFINITE |
| Q9BWD1    | Acetyl-CoA acetyltransferase, cytosolic             | ACAT2       | 1.284E+09 | INFINITE |
| Q04760    | Lactoylglutathione lyase                            | GLO1        | 1.272E+09 | INFINITE |
| Q9Y237    | Peptidyl-prolyl cis-trans isomerase NIMA-interactir | PIN4        | 1.235E+09 | INFINITE |
| Q8IY67    | Ribonucleoprotein PTB-binding 1                     | RAVER1      | 1.227E+09 | INFINITE |
| Q6PIU2    | Neutral cholesterol ester hydrolase 1               | NCEH1       | 1.222E+09 | INFINITE |
| P00568    | Adenylate kinase isoenzyme 1                        | AK1         | 1.222E+09 | INFINITE |

|                   |                                                       |             |           |          |
|-------------------|-------------------------------------------------------|-------------|-----------|----------|
| Q96RP9            | Elongation factor G, mitochondrial                    | GFM1        | 1.206E+09 | INFINITE |
| P15586            | N-acetylglucosamine-6-sulfatase                       | GNS         | 1.189E+09 | INFINITE |
| P49903            | Selenide, water dikinase 1                            | SEPHS1      | 1.17E+09  | INFINITE |
| Q9NRV9            | Heme-binding protein 1                                | HEBP1       | 1.152E+09 | INFINITE |
| PODPI2;A0A0B4J2D5 |                                                       |             | 1.138E+09 | INFINITE |
| P17252            | Protein kinase C alpha type                           | PRKCA       | 1.137E+09 | INFINITE |
| O94973            | AP-2 complex subunit alpha-2                          | AP2A2       | 1.101E+09 | INFINITE |
| Q96PE2            | Rho guanine nucleotide exchange factor 17             | ARHGEF17    | 1.1E+09   | INFINITE |
| Q9H7Z7            | Prostaglandin E synthase 2;Prostaglandin E synthase   | PTGES2      | 1.098E+09 | INFINITE |
| Q8TBC4            | NEDD8-activating enzyme E1 catalytic subunit          | UBA3        | 1.071E+09 | INFINITE |
| P52888            | Thimet oligopeptidase                                 | THOP1       | 1.059E+09 | INFINITE |
| P14174            | Macrophage migration inhibitory factor                | MIF         | 1.05E+09  | INFINITE |
| P36543            | V-type proton ATPase subunit E 1                      | ATP6V1E1    | 1.03E+09  | INFINITE |
| Q99685            | Monoglyceride lipase                                  | MGLL        | 1.021E+09 | INFINITE |
| Q9BV73            | Centrosome-associated protein CEP250                  | CEP250      | 1.008E+09 | INFINITE |
| Q13618            | Cullin-3                                              | CUL3        | 996970000 | INFINITE |
| O95352            | Ubiquitin-like modifier-activating enzyme ATG7        | ATG7        | 995700000 | INFINITE |
| Q8IYD1            | Eukaryotic peptide chain release factor GTP-binding   | GSPT2       | 984070000 | INFINITE |
| P28482            | Mitogen-activated protein kinase 1                    | MAPK1       | 979640000 | INFINITE |
| Q9NUQ9            | Protein FAM49B                                        | FAM49B      | 977310000 | INFINITE |
| P54687            | Branched-chain-amino-acid aminotransferase, cytosolic | BCAT1       | 967410000 | INFINITE |
| P43897            | Elongation factor Ts, mitochondrial                   | TSFM        | 963280000 | INFINITE |
| Q14696            | LDLR chaperone MESD                                   | MESDC2      | 959920000 | INFINITE |
| Q99961            | Endophilin-A2                                         | SH3GL1      | 955200000 | INFINITE |
| Q9Y6Y8            | SEC23-interacting protein                             | SEC23IP     | 933440000 | INFINITE |
| O75844            | CAAX prenyl protease 1 homolog                        | ZMPSTE24    | 933020000 | INFINITE |
| P08397            | Porphobilinogen deaminase                             | HMBS        | 920680000 | INFINITE |
| Q14376            | UDP-glucose 4-epimerase                               | GALE        | 907950000 | INFINITE |
| Q00796            | Sorbitol dehydrogenase                                | SORD        | 903380000 | INFINITE |
| P30405            | Peptidyl-prolyl cis-trans isomerase F, mitochondrial  | PPIF        | 877660000 | INFINITE |
| PODOY3;P0         | Ig lambda-6 chain C region;Ig lambda-7 chain C region | IGLC6;IGLC7 | 861550000 | INFINITE |
| Q96EM0            | Trans-3-hydroxy-L-proline dehydratase                 | L3HYPDH     | 859470000 | INFINITE |
| Q9Y3E5            | Peptidyl-tRNA hydrolase 2, mitochondrial              | PTRH2       | 850160000 | INFINITE |
| Q13616            | Cullin-1                                              | CUL1        | 850000000 | INFINITE |
| P40763            | Signal transducer and activator of transcription 3    | STAT3       | 844330000 | INFINITE |
| P31350            | Ribonucleoside-diphosphate reductase subunit M2       | RRM2        | 829910000 | INFINITE |
| Q9H3P7            | Golgi resident protein GCP60                          | ACBD3       | 828020000 | INFINITE |
| P09417            | Dihydropteridine reductase                            | QDPR        | 817150000 | INFINITE |
| O95394            | Phosphoacetylglucosamine mutase                       | PGM3        | 816260000 | INFINITE |
| Q969H8            | Myeloid-derived growth factor                         | MYDGF       | 814330000 | INFINITE |
| Q9NZL4            | Hsp70-binding protein 1                               | HSPBP1      | 810110000 | INFINITE |
| Q9NX46            | Poly(ADP-ribose) glycohydrolase ARH3                  | ADPRHL2     | 804080000 | INFINITE |
| Q9BV20            | Methylthioribose-1-phosphate isomerase                | MRI1        | 802890000 | INFINITE |
| Q9Y5X3            | Sorting nexin-5                                       | SNX5        | 792320000 | INFINITE |
| Q6NVY1            | 3-hydroxyisobutyryl-CoA hydrolase, mitochondrial      | HIBCH       | 785790000 | INFINITE |
| Q9UHY1            | Nuclear receptor-binding protein                      | NRBP1       | 783290000 | INFINITE |
| Q13564            | NEDD8-activating enzyme E1 regulatory subunit         | NAE1        | 778560000 | INFINITE |
| Q9H993            | Protein-glutamate O-methyltransferase                 | ARMT1       | 775450000 | INFINITE |
| Q9GZY8            | Mitochondrial fission factor                          | MFF         | 771480000 | INFINITE |
| Q9UHY7            | Enolase-phosphatase E1                                | ENOPH1      | 771210000 | INFINITE |

|        |                                                         |          |           |          |
|--------|---------------------------------------------------------|----------|-----------|----------|
| P49006 | MARCKS-related protein                                  | MARCKSL1 | 770110000 | INFINITE |
| O43768 | Alpha-endosulfine                                       | ENSA     | 766190000 | INFINITE |
| Q15126 | Phosphomevalonate kinase                                | PMVK     | 765470000 | INFINITE |
| Q9H488 | GDP-fucose protein O-fucosyltransferase 1               | POFUT1   | 764430000 | INFINITE |
| Q4J6C6 | Prolyl endopeptidase-like                               | PREPL    | 761340000 | INFINITE |
| P20645 | Cation-dependent mannose-6-phosphate receptor           | M6PR     | 742080000 | INFINITE |
| Q13423 | NAD(P) transhydrogenase, mitochondrial                  | NNT      | 739320000 | INFINITE |
| P49643 | DNA primase large subunit                               | PRIM2    | 739000000 | INFINITE |
| Q9Y333 | U6 snRNA-associated Sm-like protein LSm2                | LSM2     | 729540000 | INFINITE |
| P61956 | Small ubiquitin-related modifier 2                      | SUMO2    | 726360000 | INFINITE |
| Q99426 | Tubulin-folding cofactor B                              | TBCB     | 724240000 | INFINITE |
| Q9BV86 | N-terminal Xaa-Pro-Lys N-methyltransferase 1;N-terminal | NTMT1    | 719410000 | INFINITE |
| Q9NZ08 | Endoplasmic reticulum aminopeptidase 1                  | ERAP1    | 710780000 | INFINITE |
| P08962 | CD63 antigen                                            | CD63     | 706900000 | INFINITE |
| P20936 | Ras GTPase-activating protein 1                         | RASA1    | 703500000 | INFINITE |
| P35270 | Sepiapterin reductase                                   | SPR      | 701150000 | INFINITE |
| O14737 | Programmed cell death protein 5                         | PDCD5    | 700040000 | INFINITE |
| Q9Y2Z4 | Tyrosine--tRNA ligase, mitochondrial                    | YARS2    | 695400000 | INFINITE |
| Q9GZZ9 | Ubiquitin-like modifier-activating enzyme 5             | UBA5     | 690780000 | INFINITE |
| Q9Y2Z0 | Suppressor of G2 allele of SKP1 homolog                 | SUGT1    | 686790000 | INFINITE |
| P53041 | Serine/threonine-protein phosphatase 5                  | PPP5C    | 677340000 | INFINITE |
| P52306 | Rap1 GTPase-GDP dissociation stimulator 1               | RAP1GDS1 | 676760000 | INFINITE |
| Q53EL6 | Programmed cell death protein 4                         | PDCD4    | 667700000 | INFINITE |
| O15347 | High mobility group protein B3                          | HMGB3    | 664180000 | INFINITE |
| P12532 | Creatine kinase U-type, mitochondrial                   | CKMT1A   | 663290000 | INFINITE |
| Q14CX7 | N-alpha-acetyltransferase 25, NatB auxiliary subunit    | NAA25    | 661860000 | INFINITE |
| P48449 | Lanosterol synthase                                     | LSS      | 655180000 | INFINITE |
| Q9H5K3 | Protein O-mannose kinase                                | POMK     | 649040000 | INFINITE |
| P55039 | Developmentally-regulated GTP-binding protein 2         | DRG2     | 647350000 | INFINITE |
| Q08752 | Peptidyl-prolyl cis-trans isomerase D                   | PPID     | 645220000 | INFINITE |
| P30519 | Heme oxygenase 2                                        | HMOX2    | 631530000 | INFINITE |
| O43583 | Density-regulated protein                               | DENR     | 622950000 | INFINITE |
| Q9UHD1 | Cysteine and histidine-rich domain-containing protein   | CHORDC1  | 622640000 | INFINITE |
| Q6PI48 | Aspartate--tRNA ligase, mitochondrial                   | DARS2    | 620090000 | INFINITE |
| Q9BXW7 | Cat eye syndrome critical region protein 5              | CECR5    | 619970000 | INFINITE |
| Q06203 | Amidophosphoribosyltransferase                          | PPAT     | 614120000 | INFINITE |
| Q9UGV2 | Protein NDRG3                                           | NDRG3    | 613280000 | INFINITE |
| P01111 | GTPase NRas                                             | NRAS     | 612830000 | INFINITE |
| Q96EK6 | Glucosamine 6-phosphate N-acetyltransferase             | GNPNAT1  | 609860000 | INFINITE |
| Q9Y5K8 | V-type proton ATPase subunit D                          | ATP6V1D  | 608050000 | INFINITE |
| O00170 | AH receptor-interacting protein                         | AIP      | 605310000 | INFINITE |
| O95861 | 3(2),5-bisphosphate nucleotidase 1                      | BPNT1    | 602410000 | INFINITE |
| Q9H4A6 | Golgi phosphoprotein 3                                  | GOLPH3   | 595150000 | INFINITE |
| P54105 | Methylosome subunit pICln                               | CLNS1A   | 594880000 | INFINITE |
| Q15005 | Signal peptidase complex subunit 2                      | SPCS2    | 593310000 | INFINITE |
| Q15165 | Serum paraoxonase/arylesterase 2                        | PON2     | 590890000 | INFINITE |
| P35573 | Glycogen debranching enzyme;4-alpha-glucanotransferase  | AGL      | 588330000 | INFINITE |
| P31937 | 3-hydroxyisobutyrate dehydrogenase, mitochondrial       | HIBADH   | 587950000 | INFINITE |
| Q5TFE4 | 5-nucleotidase domain-containing protein 1              | NT5DC1   | 586900000 | INFINITE |
| P34949 | Mannose-6-phosphate isomerase                           | MPI      | 586480000 | INFINITE |

|                                  |                                                                                                    |                  |           |          |
|----------------------------------|----------------------------------------------------------------------------------------------------|------------------|-----------|----------|
| Q58FF6                           | Putative heat shock protein HSP 90-beta 4                                                          | HSP90AB4P        | 583960000 | INFINITE |
| O95336                           | 6-phosphogluconolactonase                                                                          | PGLS             | 581600000 | INFINITE |
| Q8N8S7                           | Protein enabled homolog                                                                            | ENAH             | 581280000 | INFINITE |
| Q15428                           | Splicing factor 3A subunit 2                                                                       | SF3A2            | 579850000 | INFINITE |
| Q16539                           | Mitogen-activated protein kinase 14                                                                | MAPK14           | 578690000 | INFINITE |
| P11498                           | Pyruvate carboxylase, mitochondrial                                                                | PC               | 578430000 | INFINITE |
| Q3ZCM7                           | Tubulin beta-8 chain                                                                               | TUBB8            | 578350000 | INFINITE |
| Q10713                           | Mitochondrial-processing peptidase subunit alpha                                                   | PMPCA            | 576760000 | INFINITE |
| Q9UH65                           | Switch-associated protein 70                                                                       | SWAP70           | 575680000 | INFINITE |
| Q8N3U4                           | Cohesin subunit SA-2                                                                               | STAG2            | 574540000 | INFINITE |
| Q9NRN7                           | L-aminoadipate-semialdehyde dehydrogenase-phc                                                      | AASDHPPT         | 572390000 | INFINITE |
| P25325                           | 3-mercaptopyruvate sulfurtransferase                                                               | MPST             | 571740000 | INFINITE |
| Q68EM7                           | Rho GTPase-activating protein 17                                                                   | ARHGAP17         | 563800000 | INFINITE |
| Q9NVS9                           | Pyridoxine-5-phosphate oxidase                                                                     | PNPO             | 561290000 | INFINITE |
| Q13619                           | Cullin-4A                                                                                          | CUL4A            | 556820000 | INFINITE |
| Q9BRR6                           | ADP-dependent glucokinase                                                                          | ADPGK            | 555550000 | INFINITE |
| Q9NQH7                           | Probable Xaa-Pro aminopeptidase 3                                                                  | XPNPEP3          | 555220000 | INFINITE |
| P61086                           | Ubiquitin-conjugating enzyme E2 K                                                                  | UBE2K            | 553990000 | INFINITE |
| Q9HB90;Q9H8S9;Q9H6Z4             | Ras-related GTP-binding protein C; Ras-related GTPase-activating protein 17; Ran-binding protein 3 | RRAGC;RRAGD      | 548950000 | INFINITE |
| O14908                           | PDZ domain-containing protein GIPC1                                                                | GIPC1            | 545630000 | INFINITE |
| Q9H8S9;Q9H6Z4                    | MOB kinase activator 1A; MOB kinase activator 1B                                                   | MOB1A;MOB1B      | 539610000 | INFINITE |
| Q9H6Z4                           | Ran-binding protein 3                                                                              | RANBP3           | 538930000 | INFINITE |
| Q6P587                           | Acylpyruvase FAHD1, mitochondrial                                                                  | FAHD1            | 538140000 | INFINITE |
| Q9GZT8                           | NIF3-like protein 1                                                                                | NIF3L1           | 534540000 | INFINITE |
| P10301                           | Ras-related protein R-Ras                                                                          | RRAS             | 531200000 | INFINITE |
| Q2M389                           | WASH complex subunit 7                                                                             | KIAA1033         | 530400000 | INFINITE |
| Q8NBF2                           | NHL repeat-containing protein 2                                                                    | NHLRC2           | 530190000 | INFINITE |
| Q9Y3A6                           | Transmembrane emp24 domain-containing protein 1                                                    | TMED5            | 528590000 | INFINITE |
| P21266                           | Glutathione S-transferase Mu 3                                                                     | GSTM3            | 524820000 | INFINITE |
| P53701                           | Cytochrome c-type heme lyase                                                                       | HCCS             | 523010000 | INFINITE |
| Q86X55                           | Histone-arginine methyltransferase CARM1                                                           | CARM1            | 522240000 | INFINITE |
| Q8WUX9                           | Charged multivesicular body protein 7                                                              | CHMP7            | 518150000 | INFINITE |
| P41240                           | Tyrosine-protein kinase CSK                                                                        | CSK              | 516070000 | INFINITE |
| A0A0B4J1Y9;A0A0B4J1V6;A0A0B4J1V0 |                                                                                                    | IGHV3-72;IGHV3-7 | 515680000 | INFINITE |
| Q9Y376                           | Calcium-binding protein 39                                                                         | CAB39            | 510150000 | INFINITE |
| Q9H9A6                           | Leucine-rich repeat-containing protein 40                                                          | LRRC40           | 508930000 | INFINITE |
| Q9C0B1                           | Alpha-ketoglutarate-dependent dioxygenase FTO                                                      | FTO              | 508920000 | INFINITE |
| P16930                           | Fumarylacetoacetase                                                                                | FAH              | 506400000 | INFINITE |
| Q641Q2;Q9Y376                    | WASH complex subunit FAM21A; WASH complex subunit 1                                                | FAM21A;FAM21C    | 505730000 | INFINITE |
| P62873                           | Guanine nucleotide-binding protein G(I)/G(S)/G(T)                                                  | GNB1             | 503770000 | INFINITE |
| Q92878                           | DNA repair protein RAD50                                                                           | RAD50            | 498830000 | INFINITE |
| P51553                           | Isocitrate dehydrogenase [NAD] subunit gamma, nuclear                                              | IDH3G            | 496490000 | INFINITE |
| P01859                           | Ig gamma-2 chain C region                                                                          | IGHG2            | 489920000 | INFINITE |
| Q96Q11                           | CCA tRNA nucleotidyltransferase 1, mitochondrial                                                   | TRNT1            | 486290000 | INFINITE |
| Q16204                           | Coiled-coil domain-containing protein 6                                                            | CCDC6            | 485600000 | INFINITE |
| Q15036                           | Sorting nexin-17                                                                                   | SNX17            | 483420000 | INFINITE |
| Q9UI26                           | Importin-11                                                                                        | IPO11            | 477470000 | INFINITE |
| Q16822                           | Phosphoenolpyruvate carboxykinase [GTP], mitochondrial                                             | PCK2             | 476160000 | INFINITE |
| Q8N6T3                           | ADP-ribosylation factor GTPase-activating protein 1                                                | ARFGAP1          | 474780000 | INFINITE |
| Q9Y673                           | Dolichyl-phosphate beta-glucosyltransferase                                                        | ALG5             | 472590000 | INFINITE |

|            |                                                   |          |           |          |
|------------|---------------------------------------------------|----------|-----------|----------|
| Q4V328     | GRIP1-associated protein 1                        | GRIPAP1  | 469100000 | INFINITE |
| O95983     | Methyl-CpG-binding domain protein 3               | MBD3     | 467690000 | INFINITE |
| Q7Z4H8     | KDEL motif-containing protein 2                   | KDELC2   | 465650000 | INFINITE |
| Q9P0I2     | ER membrane protein complex subunit 3             | EMC3     | 465210000 | INFINITE |
| O15173     | Membrane-associated progesterone receptor com     | PGRMC2   | 464440000 | INFINITE |
| Q9NUQ8     | ATP-binding cassette sub-family F member 3        | ABCF3    | 463290000 | INFINITE |
| O00273     | DNA fragmentation factor subunit alpha            | DFFA     | 460810000 | INFINITE |
| O00629     | Importin subunit alpha-3                          | KPNA4    | 458400000 | INFINITE |
| Q9Y5Y2     | Cytosolic Fe-S cluster assembly factor NUBP2      | NUBP2    | 457800000 | INFINITE |
| Q9UMY4     | Sorting nexin-12                                  | SNX12    | 453290000 | INFINITE |
| Q9NP79     | Vacuolar protein sorting-associated protein VTA1  | VTA1     | 451380000 | INFINITE |
| Q9NPH2     | Inositol-3-phosphate synthase 1                   | ISYNA1   | 451080000 | INFINITE |
| Q9UIJ7     | GTP:AMP phosphotransferase AK3, mitochondrial     | AK3      | 449490000 | INFINITE |
| P07203     | Glutathione peroxidase 1                          | GPX1     | 447610000 | INFINITE |
| P52594     | Arf-GAP domain and FG repeat-containing protein   | AGFG1    | 446850000 | INFINITE |
| Q15427     | Splicing factor 3B subunit 4                      | SF3B4    | 443590000 | INFINITE |
| Q16513     | Serine/threonine-protein kinase N2                | PKN2     | 442750000 | INFINITE |
| Q9UNN8     | Endothelial protein C receptor                    | PROCR    | 441270000 | INFINITE |
| Q14165     | Malectin                                          | MLEC     | 441100000 | INFINITE |
| P30046;A61 | D-dopachrome decarboxylase;D-dopachrome deca      | DDT;DDTL | 439940000 | INFINITE |
| Q7KZ85     | Transcription elongation factor SPT6              | SUPT6H   | 439470000 | INFINITE |
| Q13404     | Ubiquitin-conjugating enzyme E2 variant 1         | UBE2V1   | 439120000 | INFINITE |
| O15121     | Sphingolipid delta(4)-desaturase DES1             | DEGS1    | 436980000 | INFINITE |
| Q86UX7     | Fermitin family homolog 3                         | FERMT3   | 435780000 | INFINITE |
| Q9UBV2     | Protein sel-1 homolog 1                           | SEL1L    | 435100000 | INFINITE |
| P03886     | NADH-ubiquinone oxidoreductase chain 1            | MT-ND1   | 433410000 | INFINITE |
| Q9Y4E8     | Ubiquitin carboxyl-terminal hydrolase 15          | USP15    | 432640000 | INFINITE |
| Q8I283     | Aldehyde dehydrogenase family 16 member A1        | ALDH16A1 | 431350000 | INFINITE |
| Q9H0A8     | COMM domain-containing protein 4                  | COMM4    | 429890000 | INFINITE |
| Q13630     | GDP-L-fucose synthase                             | TSTA3    | 428510000 | INFINITE |
| Q9H9Q2     | COP9 signalosome complex subunit 7b               | COPS7B   | 428110000 | INFINITE |
| O14562     | Ubiquitin domain-containing protein UBFD1         | UBFD1    | 426770000 | INFINITE |
| Q9H3K2     | Growth hormone-inducible transmembrane protei     | GHITM    | 426500000 | INFINITE |
| Q9NWW4     | UPF0609 protein C4orf27                           | C4orf27  | 426340000 | INFINITE |
| Q96EK5     | KIF1-binding protein                              | KIAA1279 | 426270000 | INFINITE |
| O43252     | Bifunctional 3-phosphoadenosine 5-phosphosulfat   | PAPSS1   | 425650000 | INFINITE |
| P45954     | Short/branched chain specific acyl-CoA dehydroge  | ACADSB   | 424130000 | INFINITE |
| Q13158     | FAS-associated death domain protein               | FADD     | 420110000 | INFINITE |
| Q9NRF8     | CTP synthase 2                                    | CTPS2    | 419820000 | INFINITE |
| Q5VW32     | BRO1 domain-containing protein BROX               | BROX     | 419510000 | INFINITE |
| Q9P1F3     | Costars family protein ABRACL                     | ABRACL   | 418290000 | INFINITE |
| Q53T59     | HCLS1-binding protein 3                           | HS1BP3   | 417600000 | INFINITE |
| P18858     | DNA ligase 1                                      | LIG1     | 417240000 | INFINITE |
| Q6ZRP7     | Sulfhydryl oxidase 2                              | QSOX2    | 413670000 | INFINITE |
| Q9H2W6     | 39S ribosomal protein L46, mitochondrial          | MRPL46   | 412190000 | INFINITE |
| Q7Z2Z2     | Elongation factor Tu GTP-binding domain-containir | EFTUD1   | 410540000 | INFINITE |
| P20339     | Ras-related protein Rab-5A                        | RAB5A    | 407780000 | INFINITE |
| Q86TI2     | Dipeptidyl peptidase 9                            | DPP9     | 407340000 | INFINITE |
| O95777     | U6 snRNA-associated Sm-like protein LSM8          | LSM8     | 406190000 | INFINITE |
| Q9BRA2     | Thioredoxin domain-containing protein 17          | TXNDC17  | 403860000 | INFINITE |



|            |                                                      |               |           |          |
|------------|------------------------------------------------------|---------------|-----------|----------|
| O60739     | Eukaryotic translation initiation factor 1b          | EIF1B         | 400990000 | INFINITE |
| P09110     | 3-ketoacyl-CoA thiolase, peroxisomal                 | ACAA1         | 400750000 | INFINITE |
| O15027     | Protein transport protein Sec16A                     | SEC16A        | 397210000 | INFINITE |
| P30825     | High affinity cationic amino acid transporter 1      | SLC7A1        | 393680000 | INFINITE |
| Q9BXL7     | Caspase recruitment domain-containing protein 11     | CARD11        | 391560000 | INFINITE |
| O95340     | Bifunctional 3-phosphoadenosine 5-phosphosulfat      | PAPSS2        | 391300000 | INFINITE |
| Q8WVY7     | Ubiquitin-like domain-containing CTD phosphatase     | UBLCP1        | 388120000 | INFINITE |
| P52732     | Kinesin-like protein KIF11                           | KIF11         | 384080000 | INFINITE |
| Q96GA7     | Serine dehydratase-like                              | SDSL          | 382970000 | INFINITE |
| Q96DB5     | Regulator of microtubule dynamics protein 1          | RMDN1         | 381910000 | INFINITE |
| Q01581     | Hydroxymethylglutaryl-CoA synthase, cytoplasmic      | HMGCS1        | 381280000 | INFINITE |
| P30740     | Leukocyte elastase inhibitor                         | SERPINB1      | 380330000 | INFINITE |
| Q9BTU6     | Phosphatidylinositol 4-kinase type 2-alpha           | PI4K2A        | 379690000 | INFINITE |
| Q9Y371     | Endophilin-B1                                        | SH3GLB1       | 379160000 | INFINITE |
| Q9Y5P6     | Mannose-1-phosphate guanyltransferase beta           | GMPPB         | 378390000 | INFINITE |
| Q5T6V5     | UPF0553 protein C9orf64                              | C9orf64       | 378040000 | INFINITE |
| Q9H8Y8     | Golgi reassembly-stacking protein 2                  | GORASP2       | 376450000 | INFINITE |
| POC0L4;POC | Complement C4-A;Complement C4 beta chain;Con         | C4A;C4B       | 375840000 | INFINITE |
| P50583     | Bis(5-nucleosyl)-tetraphosphatase [asymmetrical]     | NUDT2         | 375090000 | INFINITE |
| Q8NFB4     | Nucleoporin Nup37                                    | NUP37         | 373640000 | INFINITE |
| P26440     | Isovaleryl-CoA dehydrogenase, mitochondrial          | IVD           | 373500000 | INFINITE |
| Q32P41     | tRNA (guanine(37)-N1)-methyltransferase              | TRMT5         | 373420000 | INFINITE |
| O43488     | Aflatoxin B1 aldehyde reductase member 2             | AKR7A2        | 373060000 | INFINITE |
| P68402     | Platelet-activating factor acetylhydrolase IB subuni | PAFAH1B2      | 372230000 | INFINITE |
| Q8N335     | Glycerol-3-phosphate dehydrogenase 1-like protei     | GPD1L         | 371640000 | INFINITE |
| Q00169     | Phosphatidylinositol transfer protein alpha isoform  | PITPNA        | 368940000 | INFINITE |
| Q9NXR7     | BRCA1-A complex subunit BRE                          | BRE           | 368930000 | INFINITE |
| Q15031     | Probable leucine--tRNA ligase, mitochondrial         | LARS2         | 365540000 | INFINITE |
| Q9UJY4     | ADP-ribosylation factor-binding protein GGA2         | GGA2          | 365370000 | INFINITE |
| Q96GK7;Q96 | Fumarylacetoacetate hydrolase domain-containing      | FAHD2A;FAHD2B | 365020000 | INFINITE |
| P27144     | Adenylate kinase 4, mitochondrial                    | AK4           | 364720000 | INFINITE |
| Q9UHA4     | Ragulator complex protein LAMTOR3                    | LAMTOR3       | 364600000 | INFINITE |
| Q16850     | Lanosterol 14-alpha demethylase                      | CYP51A1       | 362850000 | INFINITE |
| Q6UW02     | Cytochrome P450 20A1                                 | CYP20A1       | 361710000 | INFINITE |
| Q92882     | Osteoclast-stimulating factor 1                      | OSTF1         | 361410000 | INFINITE |
| O60678     | Protein arginine N-methyltransferase 3               | PRMT3         | 360690000 | INFINITE |
| Q9UNE7     | E3 ubiquitin-protein ligase CHIP                     | STUB1         | 360080000 | INFINITE |
| O14967     | Calmegin                                             | CLGN          | 359490000 | INFINITE |
| P05166     | Propionyl-CoA carboxylase beta chain, mitochondr     | PCCB          | 358800000 | INFINITE |
| Q8NHH9     | Atlastin-2                                           | ATL2          | 358730000 | INFINITE |
| Q8TD19     | Serine/threonine-protein kinase Nek9                 | NEK9          | 358260000 | INFINITE |
| P84095     | Rho-related GTP-binding protein RhoG                 | RHOG          | 357960000 | INFINITE |
| Q4VC31     | Coiled-coil domain-containing protein 58             | CCDC58        | 354620000 | INFINITE |
| Q86Y82     | Syntaxin-12                                          | STX12         | 354440000 | INFINITE |
| Q14181     | DNA polymerase alpha subunit B                       | POLA2         | 353870000 | INFINITE |
| Q9NRY5     | Protein FAM114A2                                     | FAM114A2      | 352800000 | INFINITE |
| Q9Y3L5     | Ras-related protein Rap-2c                           | RAP2C         | 352440000 | INFINITE |
| P63279     | SUMO-conjugating enzyme UBC9                         | UBE2I         | 352000000 | INFINITE |
| Q2TAL8     | Glutamine-rich protein 1                             | QRICH1        | 351510000 | INFINITE |
| Q7Z4W1     | L-xylulose reductase                                 | DCXR          | 346600000 | INFINITE |

|        |                                                     |          |           |          |
|--------|-----------------------------------------------------|----------|-----------|----------|
| Q15042 | Rab3 GTPase-activating protein catalytic subunit    | RAB3GAP1 | 344660000 | INFINITE |
| O95571 | Persulfide dioxygenase ETHE1, mitochondrial         | ETHE1    | 344030000 | INFINITE |
| P19404 | NADH dehydrogenase [ubiquinone] flavoprotein 2,     | NDUFV2   | 342880000 | INFINITE |
| Q5JRA6 | Melanoma inhibitory activity protein 3              | MIA3     | 342020000 | INFINITE |
| Q6UVK1 | Chondroitin sulfate proteoglycan 4                  | CSPG4    | 340510000 | INFINITE |
| Q69YN2 | CWF19-like protein 1                                | CWF19L1  | 340410000 | INFINITE |
| O95486 | Protein transport protein Sec24A                    | SEC24A   | 338010000 | INFINITE |
| Q9H910 | Hematological and neurological expressed 1-like p   | HN1L     | 337480000 | INFINITE |
| Q32P28 | Prolyl 3-hydroxylase 1                              | LEPRE1   | 336350000 | INFINITE |
| Q3LXA3 | Bifunctional ATP-dependent dihydroxyacetone kin     | DAK      | 335930000 | INFINITE |
| Q9UBP6 | tRNA (guanine-N(7)-)-methyltransferase              | METTL1   | 335640000 | INFINITE |
| P27707 | Deoxycytidine kinase                                | DCK      | 333710000 | INFINITE |
| Q5JTZ9 | Alanine--tRNA ligase, mitochondrial                 | AARS2    | 333550000 | INFINITE |
| Q0VDF9 | Heat shock 70 kDa protein 14                        | HSPA14   | 332490000 | INFINITE |
| P82970 | High mobility group nucleosome-binding domain-c     | HMGNS5   | 331260000 | INFINITE |
| Q8NF37 | Lysophosphatidylcholine acyltransferase 1           | LPCAT1   | 330770000 | INFINITE |
| Q13478 | Interleukin-18 receptor 1                           | IL18R1   | 330730000 | INFINITE |
| Q9UHQ9 | NADH-cytochrome b5 reductase 1                      | CYB5R1   | 330250000 | INFINITE |
| Q14155 | Rho guanine nucleotide exchange factor 7            | ARHGEF7  | 329780000 | INFINITE |
| P49902 | Cytosolic purine 5-nucleotidase                     | NT5C2    | 329010000 | INFINITE |
| P49366 | Deoxyhypusine synthase                              | DHPS     | 326590000 | INFINITE |
| O15126 | Secretory carrier-associated membrane protein 1     | SCAMP1   | 326310000 | INFINITE |
| Q9BYT8 | Neurolysin, mitochondrial                           | NLN      | 325950000 | INFINITE |
| Q6L8Q7 | 2,5-phosphodiesterase 12                            | PDE12    | 325190000 | INFINITE |
| P80303 | Nucleobindin-2;Nesfatin-1                           | NUCB2    | 324740000 | INFINITE |
| Q9NZT2 | Opioid growth factor receptor                       | OGFR     | 324590000 | INFINITE |
| Q8IYI6 | Exocyst complex component 8                         | EXOC8    | 322950000 | INFINITE |
| P49642 | DNA primase small subunit                           | PRIM1    | 322510000 | INFINITE |
| O95487 | Protein transport protein Sec24B                    | SEC24B   | 321350000 | INFINITE |
| Q6NXE6 | Armadillo repeat-containing protein 6               | ARMC6    | 319360000 | INFINITE |
| Q9H2P9 | Diphthine synthase                                  | DPH5     | 319050000 | INFINITE |
| P98082 | Disabled homolog 2                                  | DAB2     | 318230000 | INFINITE |
| Q96B97 | SH3 domain-containing kinase-binding protein 1      | SH3KBP1  | 318010000 | INFINITE |
| Q9HD20 | Manganese-transporting ATPase 13A1                  | ATP13A1  | 317340000 | INFINITE |
| O00401 | Neural Wiskott-Aldrich syndrome protein             | WASL     | 316260000 | INFINITE |
| Q12846 | Syntaxin-4                                          | STX4     | 315240000 | INFINITE |
| Q8TF05 | Serine/threonine-protein phosphatase 4 regulator    | PPP4R1   | 309600000 | INFINITE |
| Q9NQ88 | Fructose-2,6-bisphosphatase TIGAR                   | TIGAR    | 308080000 | INFINITE |
| Q9H9T3 | Elongator complex protein 3                         | ELP3     | 307860000 | INFINITE |
| Q9BW91 | ADP-ribose pyrophosphatase, mitochondrial           | NUDT9    | 304270000 | INFINITE |
| Q9H832 | Ubiquitin-conjugating enzyme E2 Z                   | UBE2Z    | 303490000 | INFINITE |
| Q9NVI1 | Fanconi anemia group I protein                      | FANCI    | 303170000 | INFINITE |
| Q9NPA0 | ER membrane protein complex subunit 7               | EMC7     | 302710000 | INFINITE |
| O60826 | Coiled-coil domain-containing protein 22            | CCDC22   | 302120000 | INFINITE |
| Q96RQ3 | Methylcrotonoyl-CoA carboxylase subunit alpha, m    | MCCC1    | 298770000 | INFINITE |
| O94760 | N(G),N(G)-dimethylarginine dimethylaminohydroly     | DDAH1    | 298310000 | INFINITE |
| Q92747 | Actin-related protein 2/3 complex subunit 1A        | ARPC1A   | 294980000 | INFINITE |
| Q13451 | Peptidyl-prolyl cis-trans isomerase FKBP5;Peptidyl- | FKBP5    | 294790000 | INFINITE |
| Q96PZ0 | Pseudouridylate synthase 7 homolog                  | PUS7     | 294240000 | INFINITE |
| Q16706 | Alpha-mannosidase 2                                 | MAN2A1   | 293320000 | INFINITE |

|           |                                                                  |          |           |          |
|-----------|------------------------------------------------------------------|----------|-----------|----------|
| Q9HBM1    | Kinetochores protein Spc25                                       | SPC25    | 293010000 | INFINITE |
| Q9ULC3    | Ras-related protein Rab-23                                       | RAB23    | 291190000 | INFINITE |
| Q969T9    | WW domain-binding protein 2                                      | WBP2     | 291160000 | INFINITE |
| Q96PD2    | Discoidin, CUB and LCCL domain-containing protein                | DCBLD2   | 290810000 | INFINITE |
| Q96A49    | Synapse-associated protein 1                                     | SYAP1    | 288860000 | INFINITE |
| Q92530    | Proteasome inhibitor PI31 subunit                                | PSMF1    | 288040000 | INFINITE |
| Q3YEC7    | Rab-like protein 6                                               | RABL6    | 287960000 | INFINITE |
| Q96C86    | m7GpppX diphosphatase                                            | DCPS     | 287560000 | INFINITE |
| Q8WW59    | SPRY domain-containing protein 4                                 | SPRYD4   | 287300000 | INFINITE |
| Q16762    | Thiosulfate sulfurtransferase                                    | TST      | 285650000 | INFINITE |
| Q9UBQ0    | Vacuolar protein sorting-associated protein 29                   | VPS29    | 285100000 | INFINITE |
| Q9UBC2    | Epidermal growth factor receptor substrate 15-like               | EPS15L1  | 284970000 | INFINITE |
| P37235    | Hippocalcin-like protein 1                                       | HPCAL1   | 284780000 | INFINITE |
| Q6P179    | Endoplasmic reticulum aminopeptidase 2                           | ERAP2    | 284620000 | INFINITE |
| O95273    | Cyclin-D1-binding protein 1                                      | CCNDBP1  | 283670000 | INFINITE |
| P51151    | Ras-related protein Rab-9A                                       | RAB9A    | 280370000 | INFINITE |
| Q04206    | Transcription factor p65                                         | RELA     | 277340000 | INFINITE |
| P13984    | General transcription factor IIF subunit 2                       | GTF2F2   | 275730000 | INFINITE |
| P10321;P0 | HLA class I histocompatibility antigen, Cw-7 alpha (HLA-C;HLA-H) |          | 274980000 | INFINITE |
| Q8IWB7    | WD repeat and FYVE domain-containing protein 1                   | WDFY1    | 274940000 | INFINITE |
| O95630    | STAM-binding protein                                             | STAMBP   | 274070000 | INFINITE |
| Q9NS87    | Kinesin-like protein KIF15                                       | KIF15    | 274040000 | INFINITE |
| Q9Y6M9    | NADH dehydrogenase [ubiquinone] 1 beta subunit                   | NDUFB9   | 273630000 | INFINITE |
| O75352    | Mannose-P-dolichol utilization defect 1 protein                  | MPDU1    | 273270000 | INFINITE |
| Q9NQR4    | Omega-amidase NIT2                                               | NIT2     | 272180000 | INFINITE |
| O43676    | NADH dehydrogenase [ubiquinone] 1 beta subunit                   | NDUFB3   | 272020000 | INFINITE |
| Q724H3    | HD domain-containing protein 2                                   | HDDC2    | 271770000 | INFINITE |
| Q9HCN4    | GPN-loop GTPase 1                                                | GPN1     | 271740000 | INFINITE |
| O14787    | Transportin-2                                                    | TNPO2    | 271670000 | INFINITE |
| Q9H9P8    | L-2-hydroxyglutarate dehydrogenase, mitochondrial                | L2HGDH   | 270410000 | INFINITE |
| Q9Y320    | Thioredoxin-related transmembrane protein 2                      | TMX2     | 269410000 | INFINITE |
| P15374    | Ubiquitin carboxyl-terminal hydrolase isozyme L3                 | UCHL3    | 269340000 | INFINITE |
| Q9P0S9    | Transmembrane protein 14C                                        | TMEM14C  | 268900000 | INFINITE |
| P62942    | Peptidyl-prolyl cis-trans isomerase FKBP1A                       | FKBP1A   | 265980000 | INFINITE |
| Q96S66    | Chloride channel CLIC-like protein 1                             | CLCC1    | 264440000 | INFINITE |
| Q16740    | ATP-dependent Clp protease proteolytic subunit, nuclear          | CLPP     | 264170000 | INFINITE |
| Q02252    | Methylmalonate-semialdehyde dehydrogenase [acetyl-CoA]           | ALDH6A1  | 263720000 | INFINITE |
| Q12996    | Cleavage stimulation factor subunit 3                            | CSTF3    | 262780000 | INFINITE |
| Q9NVV0    | Trimeric intracellular cation channel type B                     | TMEM38B  | 261880000 | INFINITE |
| Q92917    | G patch domain and KOW motifs-containing protein                 | GPKOW    | 261350000 | INFINITE |
| Q6PD62    | RNA polymerase-associated protein CTR9 homolog                   | CTR9     | 261010000 | INFINITE |
| P48507    | Glutamate--cysteine ligase regulatory subunit                    | GCLM     | 258870000 | INFINITE |
| Q9NR19    | Acetyl-coenzyme A synthetase, cytoplasmic                        | ACSS2    | 257820000 | INFINITE |
| Q13043    | Serine/threonine-protein kinase 4;Serine/threonine kinase        | STK4     | 256110000 | INFINITE |
| Q9GZP9    | Derlin-2                                                         | DERL2    | 255390000 | INFINITE |
| Q13363    | C-terminal-binding protein 1                                     | CTBP1    | 254810000 | INFINITE |
| Q9Y697    | Cysteine desulfurase, mitochondrial                              | NFS1     | 253100000 | INFINITE |
| Q14160    | Protein scribble homolog                                         | SCRIB    | 253010000 | INFINITE |
| O15091    | Mitochondrial ribonuclease P protein 3                           | KIAA0391 | 246830000 | INFINITE |
| P56211    | cAMP-regulated phosphoprotein 19                                 | ARPP19   | 246370000 | INFINITE |

|          |                                                         |                 |           |          |
|----------|---------------------------------------------------------|-----------------|-----------|----------|
| Q9NY27   | Serine/threonine-protein phosphatase 4 regulator        | PPP4R2          | 245710000 | INFINITE |
| Q9Y6I3   | Epsin-1                                                 | EPN1            | 245280000 | INFINITE |
| P78330   | Phosphoserine phosphatase                               | PSPH            | 245210000 | INFINITE |
| Q9H2J4   | Phosducin-like protein 3                                | PDCL3           | 245100000 | INFINITE |
| Q9HOR6   | Glutamyl-tRNA(Gln) amidotransferase subunit A, n        | QRSL1           | 245000000 | INFINITE |
| Q04941   | Proteolipid protein 2                                   | PLP2            | 244800000 | INFINITE |
| Q6XZF7   | Dynamin-binding protein                                 | DNMBP           | 244660000 | INFINITE |
| Q9NRX4   | 14 kDa phosphohistidine phosphatase                     | PHPT1           | 244650000 | INFINITE |
| O43169   | Cytochrome b5 type B                                    | CYB5B           | 243160000 | INFINITE |
| Q9NZD8   | Masparadin                                              | SPG21           | 242990000 | INFINITE |
| O94855   | Protein transport protein Sec24D                        | SEC24D          | 242630000 | INFINITE |
| P05089   | Arginase-1                                              | ARG1            | 242350000 | INFINITE |
| Q8NA56   | Tetratricopeptide repeat protein 29                     | TTC29           | 242190000 | INFINITE |
| Q9Y6Y0   | Influenza virus NS1A-binding protein                    | IVNS1ABP        | 241230000 | INFINITE |
| Q9UPU5   | Ubiquitin carboxyl-terminal hydrolase 24                | USP24           | 240270000 | INFINITE |
| Q0VDG4   | Secernin-3                                              | SCRN3           | 240080000 | INFINITE |
| Q08209   | Serine/threonine-protein phosphatase 2B catalytic       | PPP3CA          | 239840000 | INFINITE |
| Q12929   | Epidermal growth factor receptor kinase substrate       | EPS8            | 239130000 | INFINITE |
| P60033   | CD81 antigen                                            | CD81            | 239040000 | INFINITE |
| P61129   | Zinc finger CCCH domain-containing protein 6            | ZC3H6           | 238630000 | INFINITE |
| Q9BW83   | Intraflagellar transport protein 27 homolog             | IFT27           | 236860000 | INFINITE |
| Q8IYB8   | ATP-dependent RNA helicase SUPV3L1, mitochondr          | SUPV3L1         | 236800000 | INFINITE |
| Q96L92   | Sorting nexin-27                                        | SNX27           | 236290000 | INFINITE |
| O95155   | Ubiquitin conjugation factor E4 B                       | UBE4B           | 235710000 | INFINITE |
| Q96J02   | E3 ubiquitin-protein ligase Itchy homolog               | ITCH            | 233930000 | INFINITE |
| O95563   | Mitochondrial pyruvate carrier 2                        | MPC2            | 233880000 | INFINITE |
| Q14653   | Interferon regulatory factor 3                          | IRF3            | 233790000 | INFINITE |
| Q8NFV4   | Alpha/beta hydrolase domain-containing protein 1        | ABHD11          | 231790000 | INFINITE |
| Q9Y3D6   | Mitochondrial fission 1 protein                         | FIS1            | 231220000 | INFINITE |
| Q5TC12   | ATP synthase mitochondrial F1 complex assembly          | ATPAF1          | 229600000 | INFINITE |
| A0A0G2JM | HLA class II histocompatibility antigen, DR alpha ch    | HLA-DRA;HLA-DQA | 229500000 | INFINITE |
| Q9NUY8   | TBC1 domain family member 23                            | TBC1D23         | 228790000 | INFINITE |
| P42892   | Endothelin-converting enzyme 1                          | ECE1            | 228320000 | INFINITE |
| P22570   | NADPH:adrenodoxin oxidoreductase, mitochondria          | FDXR            | 228140000 | INFINITE |
| Q9H074   | Polyadenylate-binding protein-interacting protein       | PAIP1           | 228050000 | INFINITE |
| Q8NHP8   | Putative phospholipase B-like 2;Putative phospholi      | PLBD2           | 227360000 | INFINITE |
| Q9BXX5   | Bcl-2-like protein 13                                   | BCL2L13         | 224980000 | INFINITE |
| Q4KWH8   | 1-phosphatidylinositol 4,5-bisphosphate phosphod        | PLCH1           | 224580000 | INFINITE |
| Q92990   | Glomulin                                                | GLMN            | 224310000 | INFINITE |
| P26232   | Catenin alpha-2                                         | CTNNA2          | 223800000 | INFINITE |
| P56378   | 6.8 kDa mitochondrial proteolipid                       | MP68            | 222930000 | INFINITE |
| Q7Z7A4   | PX domain-containing protein kinase-like protein        | PXK             | 222730000 | INFINITE |
| Q96EY8   | Cob(II)yrinic acid a,c-diamide adenosyltransferase,     | MMAB            | 222440000 | INFINITE |
| O14777   | Kinetochore protein NDC80 homolog                       | NDC80           | 221780000 | INFINITE |
| Q5T6F2   | Ubiquitin-associated protein 2                          | UBAP2           | 221630000 | INFINITE |
| Q8IVL6   | Prolyl 3-hydroxylase 3                                  | LEPREL2         | 221040000 | INFINITE |
| P11171   | Protein 4.1                                             | EPB41           | 220480000 | INFINITE |
| Q9Y606   | tRNA pseudouridine synthase A, mitochondrial            | PUS1            | 220300000 | INFINITE |
| Q14240   | Eukaryotic initiation factor 4A-II;Eukaryotic initiatic | EIF4A2          | 219370000 | INFINITE |
| Q12769   | Nuclear pore complex protein Nup160                     | NUP160          | 219330000 | INFINITE |

|               |                                                                             |             |           |          |
|---------------|-----------------------------------------------------------------------------|-------------|-----------|----------|
| P07947;P07948 | Tyrosine-protein kinase Yes;Tyrosine-protein kinase YES1;FYN                |             | 219140000 | INFINITE |
| Q12972        | Nuclear inhibitor of protein phosphatase 1;Activator protein 1              | PPP1R8      | 216890000 | INFINITE |
| O60784        | Target of Myb protein 1                                                     | TOM1        | 216430000 | INFINITE |
| Q9H267        | Vacuolar protein sorting-associated protein 33B                             | VPS33B      | 216340000 | INFINITE |
| Q8N0U8        | Vitamin K epoxide reductase complex subunit 1-like 1                        | VKORC1L1    | 216150000 | INFINITE |
| Q9UFN0        | Protein NipSnap homolog 3A                                                  | NIPSNAP3A   | 215400000 | INFINITE |
| Q676U5        | Autophagy-related protein 16-1                                              | ATG16L1     | 214720000 | INFINITE |
| P56589        | Peroxisomal biogenesis factor 3                                             | PEX3        | 214710000 | INFINITE |
| Q9P2R7        | Succinyl-CoA ligase [ADP-forming] subunit beta, mitochondrial               | SUCLA2      | 214530000 | INFINITE |
| Q07812        | Apoptosis regulator BAX                                                     | BAX         | 214440000 | INFINITE |
| Q5SRE5        | Nucleoporin NUP188 homolog                                                  | NUP188      | 214170000 | INFINITE |
| Q9BXB4        | Oxysterol-binding protein-related protein 11                                | OSBPL11     | 214090000 | INFINITE |
| Q9P2T1        | GMP reductase 2                                                             | GMPR2       | 213780000 | INFINITE |
| Q96K76        | Ubiquitin carboxyl-terminal hydrolase 47                                    | USP47       | 213650000 | INFINITE |
| Q96RS6        | NudC domain-containing protein 1                                            | NUDCD1      | 213580000 | INFINITE |
| Q13636        | Ras-related protein Rab-31                                                  | RAB31       | 213370000 | INFINITE |
| Q5T0F9        | Coiled-coil and C2 domain-containing protein 1B                             | CC2D1B      | 213090000 | INFINITE |
| Q9BQC3        | Diphthamide biosynthesis protein 2                                          | DPH2        | 212590000 | INFINITE |
| Q96C90        | Protein phosphatase 1 regulatory subunit 14B                                | PPP1R14B    | 211130000 | INFINITE |
| Q5T2E6        | UPF0668 protein C10orf76                                                    | C10orf76    | 210900000 | INFINITE |
| Q9BWH6        | RNA polymerase II-associated protein 1                                      | RPAP1       | 210770000 | INFINITE |
| P29992        | Guanine nucleotide-binding protein subunit alpha-1                          | GNA11       | 210320000 | INFINITE |
| Q8WWC4        | Uncharacterized protein C2orf47, mitochondrial                              | C2orf47     | 210280000 | INFINITE |
| Q92466        | DNA damage-binding protein 2                                                | DDB2        | 210240000 | INFINITE |
| P48723        | Heat shock 70 kDa protein 13                                                | HSPA13      | 210050000 | INFINITE |
| P51809        | Vesicle-associated membrane protein 7                                       | VAMP7       | 206460000 | INFINITE |
| Q9BPU6        | Dihydropyrimidinase-related protein 5                                       | DPYSL5      | 206220000 | INFINITE |
| P60520        | Gamma-aminobutyric acid receptor-associated protein 2                       | GABARAPL2   | 205800000 | INFINITE |
| Q6NZ67;Q6NZ68 | Mitotic-spindle organizing protein 2B;Mitotic-spindle organizing protein 2A | MZT2B;MZT2A | 205450000 | INFINITE |
| Q13325        | Interferon-induced protein with tetratricopeptide repeats 5                 | IFIT5       | 205210000 | INFINITE |
| Q14997        | Proteasome activator complex subunit 4                                      | PSME4       | 204530000 | INFINITE |
| O00291        | Huntingtin-interacting protein 1                                            | HIP1        | 203710000 | INFINITE |
| P46199        | Translation initiation factor IF-2, mitochondrial                           | MTIF2       | 203520000 | INFINITE |
| Q92692        | Nectin-2                                                                    | PVRL2       | 202250000 | INFINITE |
| P49418        | Amphiphysin                                                                 | AMPH        | 201920000 | INFINITE |
| Q6P1J9        | Parafibromin                                                                | CDC73       | 200240000 | INFINITE |
| Q7KZN9        | Cytochrome c oxidase assembly protein COX15 homolog                         | COX15       | 200230000 | INFINITE |
| O75368        | SH3 domain-binding glutamic acid-rich-like protein                          | SH3BGRL     | 199980000 | INFINITE |
| P62312        | U6 snRNA-associated Sm-like protein LSM6                                    | LSM6        | 199740000 | INFINITE |
| O15127        | Secretory carrier-associated membrane protein 2                             | SCAMP2      | 199460000 | INFINITE |
| O14920        | Inhibitor of nuclear factor kappa-B kinase subunit 1                        | IKKB        | 198900000 | INFINITE |
| Q96D71        | RalBP1-associated Eps domain-containing protein 1                           | REPS1       | 198200000 | INFINITE |
| Q12768        | WASH complex subunit strumpellin                                            | KIAA0196    | 198030000 | INFINITE |
| Q16563        | Synaptophysin-like protein 1                                                | SYPL1       | 198020000 | INFINITE |
| P38571        | Lysosomal acid lipase/cholesterol ester hydrolase                           | LIPA        | 197390000 | INFINITE |
| Q96KA5        | Cleft lip and palate transmembrane protein 1-like 1                         | CLPTM1L     | 197320000 | INFINITE |
| Q96PU8        | Protein quaking                                                             | QKI         | 196460000 | INFINITE |
| P61225        | Ras-related protein Rap-2b                                                  | RAP2B       | 196160000 | INFINITE |
| Q14139        | Ubiquitin conjugation factor E4 A                                           | UBE4A       | 195860000 | INFINITE |
| Q16644        | MAP kinase-activated protein kinase 3                                       | MAPKAPK3    | 195850000 | INFINITE |

|        |                                                     |          |           |          |
|--------|-----------------------------------------------------|----------|-----------|----------|
| Q8N668 | COMM domain-containing protein 1                    | COMMD1   | 194470000 | INFINITE |
| Q9Y5P4 | Collagen type IV alpha-3-binding protein            | COL4A3BP | 194250000 | INFINITE |
| Q8TCD5 | 5(3)-deoxyribonucleotidase, cytosolic type          | NT5C     | 193690000 | INFINITE |
| P04637 | Cellular tumor antigen p53                          | TP53     | 192030000 | INFINITE |
| P42126 | Enoyl-CoA delta isomerase 1, mitochondrial          | ECI1     | 191880000 | INFINITE |
| Q13425 | Beta-2-syntrophin                                   | SNTB2    | 191740000 | INFINITE |
| P42330 | Aldo-keto reductase family 1 member C3              | AKR1C3   | 190580000 | INFINITE |
| Q8IXH7 | Negative elongation factor C/D                      | NELFCD   | 189980000 | INFINITE |
| Q9HD42 | Charged multivesicular body protein 1a              | CHMP1A   | 189710000 | INFINITE |
| Q9Y263 | Phospholipase A-2-activating protein                | PLAA     | 188960000 | INFINITE |
| Q9GZT4 | Serine racemase                                     | SRR      | 188660000 | INFINITE |
| P43003 | Excitatory amino acid transporter 1                 | SLC1A3   | 188540000 | INFINITE |
| Q9BUI4 | DNA-directed RNA polymerase III subunit RPC3        | POLR3C   | 187850000 | INFINITE |
| Q9UNI6 | Dual specificity protein phosphatase 12             | DUSP12   | 187690000 | INFINITE |
| P51003 | Poly(A) polymerase alpha                            | PAPOLA   | 187330000 | INFINITE |
| Q5T447 | E3 ubiquitin-protein ligase HECTD3                  | HECTD3   | 187220000 | INFINITE |
| Q13576 | Ras GTPase-activating-like protein IQGAP2           | IQGAP2   | 186860000 | INFINITE |
| P40123 | Adenylyl cyclase-associated protein 2               | CAP2     | 186070000 | INFINITE |
| Q6P1N9 | Putative deoxyribonuclease TATDN1                   | TATDN1   | 185780000 | INFINITE |
| P57740 | Nuclear pore complex protein Nup107                 | NUP107   | 185730000 | INFINITE |
| Q6UXV4 | MICOS complex subunit MIC27                         | APOOL    | 183810000 | INFINITE |
| O95302 | Peptidyl-prolyl cis-trans isomerase FKBP9           | FKBP9    | 183600000 | INFINITE |
| Q7Z7H5 | Transmembrane emp24 domain-containing protein       | TMED4    | 183390000 | INFINITE |
| Q9NR09 | Baculoviral IAP repeat-containing protein 6         | BIRC6    | 183210000 | INFINITE |
| Q9P265 | Disco-interacting protein 2 homolog B               | DIP2B    | 182660000 | INFINITE |
| O95372 | Acyl-protein thioesterase 2                         | LYPLA2   | 181530000 | INFINITE |
| P23786 | Carnitine O-palmitoyltransferase 2, mitochondrial   | CPT2     | 180300000 | INFINITE |
| P29353 | SHC-transforming protein 1                          | SHC1     | 180240000 | INFINITE |
| Q99614 | Tetratricopeptide repeat protein 1                  | TTC1     | 180190000 | INFINITE |
| P60510 | Serine/threonine-protein phosphatase 4 catalytic s  | PPP4C    | 179580000 | INFINITE |
| P06756 | Integrin alpha-V;Integrin alpha-V heavy chain;Integ | ITGAV    | 179450000 | INFINITE |
| P16219 | Short-chain specific acyl-CoA dehydrogenase, mito   | ACADS    | 177800000 | INFINITE |
| Q5T440 | Putative transferase CAF17, mitochondrial           | IBA57    | 177440000 | INFINITE |
| Q7LBC6 | Lysine-specific demethylase 3B                      | KDM3B    | 177310000 | INFINITE |
| Q9Y311 | F-box only protein 7                                | FBXO7    | 177250000 | INFINITE |
| P57076 | UPF0769 protein C21orf59                            | C21orf59 | 177110000 | INFINITE |
| Q9P2W9 | Syntaxin-18                                         | STX18    | 175020000 | INFINITE |
| Q8WZ82 | Ovarian cancer-associated gene 2 protein            | OVCA2    | 174640000 | INFINITE |
| Q8WU79 | Stromal membrane-associated protein 2               | SMAP2    | 174360000 | INFINITE |
| P82094 | TATA element modulatory factor                      | TMF1     | 173310000 | INFINITE |
| P14859 | POU domain, class 2, transcription factor 1         | POU2F1   | 173180000 | INFINITE |
| O95219 | Sorting nexin-4                                     | SNX4     | 173050000 | INFINITE |
| P07311 | Acylphosphatase-1                                   | ACYP1    | 171420000 | INFINITE |
| Q96ER3 | Protein SAAL1                                       | SAAL1    | 171160000 | INFINITE |
| Q8N6H7 | ADP-ribosylation factor GTPase-activating protein   | ARFGAP2  | 170790000 | INFINITE |
| Q9NRL2 | Bromodomain adjacent to zinc finger domain prote    | BAZ1A    | 170330000 | INFINITE |
| O75880 | Protein SCO1 homolog, mitochondrial                 | SCO1     | 168330000 | INFINITE |
| P63313 | Thymosin beta-10                                    | TMSB10   | 168030000 | INFINITE |
| Q04721 | Neurogenic locus notch homolog protein 2;Notch 2    | NOTCH2   | 167750000 | INFINITE |
| Q9BXR0 | Queuine tRNA-ribosyltransferase                     | QTRT1    | 167390000 | INFINITE |

|               |                                                                         |                  |           |          |
|---------------|-------------------------------------------------------------------------|------------------|-----------|----------|
| O14957        | Cytochrome b-c1 complex subunit 10                                      | UQCR11           | 167360000 | INFINITE |
| P80297;P02907 | Metallothionein-1X;Metallothionein-2;Metallothionein-3                  | MT1X;MT2A;MT1C   | 166950000 | INFINITE |
| Q9UIQ6        | Leucyl-cystinyl aminopeptidase;Leucyl-cystinyl aminopeptidase           | LNPEP            | 166940000 | INFINITE |
| Q9UGI8        | Testin                                                                  | TES              | 166800000 | INFINITE |
| Q99595        | Mitochondrial import inner membrane translocase                         | TIMM17A          | 166790000 | INFINITE |
| P49005        | DNA polymerase delta subunit 2                                          | POLD2            | 166570000 | INFINITE |
| Q8NBU5        | ATPase family AAA domain-containing protein 1                           | ATAD1            | 165800000 | INFINITE |
| O75718        | Cartilage-associated protein                                            | CRTAP            | 165730000 | INFINITE |
| P31749        | RAC-alpha serine/threonine-protein kinase                               | AKT1             | 165610000 | INFINITE |
| Q9H0B6        | Kinesin light chain 2                                                   | KLC2             | 165430000 | INFINITE |
| P26572        | Alpha-1,3-mannosyl-glycoprotein 2-beta-N-acetylglucosaminyltransferase  | MGAT1            | 165080000 | INFINITE |
| Q8N543        | Prolyl 3-hydroxylase                                                    | OGFOD1           | 164680000 | INFINITE |
| Q96I15        | Selenocysteine lyase                                                    | SCLY             | 164150000 | INFINITE |
| O95140        | Mitofusin-2                                                             | MFN2             | 164100000 | INFINITE |
| O15400        | Syntaxin-7                                                              | STX7             | 164070000 | INFINITE |
| Q9Y6I9        | Testis-expressed sequence 264 protein                                   | TEX264           | 163780000 | INFINITE |
| P31151        | Protein S100-A7                                                         | S100A7           | 163760000 | INFINITE |
| O75792        | Ribonuclease H2 subunit A                                               | RNASEH2A         | 163540000 | INFINITE |
| Q9Y3A3        | MOB-like protein phocein                                                | MOB4             | 163530000 | INFINITE |
| Q6S8J3;A51407 | POTE ankyrin domain family member E;POTE ankyrin domain family member E | POTEE;POTEF;POTE | 163310000 | INFINITE |
| P52294        | Importin subunit alpha-5;Importin subunit alpha-5                       | KPNA1            | 163090000 | INFINITE |
| Q3SXM5        | Inactive hydroxysteroid dehydrogenase-like protein                      | HSDL1            | 162330000 | INFINITE |
| Q8NBQ5        | Estradiol 17-beta-dehydrogenase 11                                      | HSD17B11         | 161870000 | INFINITE |
| Q15041        | ADP-ribosylation factor-like protein 6-interacting protein              | ARL6IP1          | 161710000 | INFINITE |
| Q93034        | Cullin-5                                                                | CUL5             | 161240000 | INFINITE |
| Q16774        | Guanylate kinase                                                        | GUK1             | 160980000 | INFINITE |
| O60306        | Intron-binding protein aquarius                                         | AQR              | 160570000 | INFINITE |
| Q9UJY5        | ADP-ribosylation factor-binding protein GGA1                            | GGA1             | 160570000 | INFINITE |
| P33908        | Mannosyl-oligosaccharide 1,2-alpha-mannosidase                          | MAN1A1           | 158690000 | INFINITE |
| Q9UK45        | U6 snRNA-associated Sm-like protein LSM7                                | LSM7             | 158490000 | INFINITE |
| Q9BUB7        | Transmembrane protein 70, mitochondrial                                 | TMEM70           | 158460000 | INFINITE |
| P62256        | Ubiquitin-conjugating enzyme E2 H                                       | UBE2H            | 158430000 | INFINITE |
| P10253        | Lysosomal alpha-glucosidase;76 kDa lysosomal alpha-glucosidase          | GAA              | 158430000 | INFINITE |
| A0A0G2JRW6    |                                                                         |                  | 158410000 | INFINITE |
| Q96552        | GPI transamidase component PIG-S                                        | PIGS             | 158320000 | INFINITE |
| P98170        | E3 ubiquitin-protein ligase XIAP                                        | XIAP             | 157970000 | INFINITE |
| Q9UNP9        | Peptidyl-prolyl cis-trans isomerase E                                   | PPIE             | 157890000 | INFINITE |
| Q9UP83        | Conserved oligomeric Golgi complex subunit 5                            | COG5             | 157510000 | INFINITE |
| Q08188        | Protein-glutamine gamma-glutamyltransferase E;P                         | TGM3             | 157500000 | INFINITE |
| O43913        | Origin recognition complex subunit 5                                    | ORC5             | 157220000 | INFINITE |
| P09884        | DNA polymerase alpha catalytic subunit                                  | POLA1            | 156870000 | INFINITE |
| P51948        | CDK-activating kinase assembly factor MAT1                              | MINAT1           | 156660000 | INFINITE |
| Q9Y2D4        | Exocyst complex component 6B                                            | EXOC6B           | 156520000 | INFINITE |
| Q9HBH5        | Retinol dehydrogenase 14                                                | RDH14            | 155960000 | INFINITE |
| O43149        | Zinc finger ZZ-type and EF-hand domain-containing protein               | ZZEF1            | 155720000 | INFINITE |
| Q14149        | MORC family CW-type zinc finger protein 3                               | MORC3            | 155530000 | INFINITE |
| Q16134        | Electron transfer flavoprotein-ubiquinone oxidoreductase                | ETFDH            | 155170000 | INFINITE |
| Q9Y276        | Mitochondrial chaperone BCS1                                            | BCS1L            | 154870000 | INFINITE |
| Q6YP21        | Kynurenine--oxoglutarate transaminase 3                                 | CCBL2            | 154870000 | INFINITE |
| Q9Y2I1        | Nischarin                                                               | NISCH            | 154690000 | INFINITE |

|        |                                                      |          |           |          |
|--------|------------------------------------------------------|----------|-----------|----------|
| Q8IZ81 | ELMO domain-containing protein 2                     | ELMOD2   | 154590000 | INFINITE |
| Q9BZV1 | UBX domain-containing protein 6                      | UBXN6    | 154140000 | INFINITE |
| P34896 | Serine hydroxymethyltransferase, cytosolic           | SHMT1    | 153900000 | INFINITE |
| Q99797 | Mitochondrial intermediate peptidase                 | MIPEP    | 153320000 | INFINITE |
| Q9NPF4 | Probable tRNA N6-adenosine threonylcarbamoyltr       | OSGEP    | 153000000 | INFINITE |
| Q9Y4E6 | WD repeat-containing protein 7                       | WDR7     | 152960000 | INFINITE |
| Q9NRG0 | Chromatin accessibility complex protein 1            | CHRAC1   | 152410000 | INFINITE |
| Q00013 | 55 kDa erythrocyte membrane protein                  | MPP1     | 152220000 | INFINITE |
| Q8WUH6 | Transmembrane protein 263                            | TMEM263  | 152190000 | INFINITE |
| P42226 | Signal transducer and activator of transcription 6   | STAT6    | 151950000 | INFINITE |
| Q96F07 | Cytoplasmic FMR1-interacting protein 2               | CYFIP2   | 151720000 | INFINITE |
| P48426 | Phosphatidylinositol 5-phosphate 4-kinase type-2     | PIP4K2A  | 151700000 | INFINITE |
| Q99627 | COP9 signalosome complex subunit 8                   | COPS8    | 151540000 | INFINITE |
| P42566 | Epidermal growth factor receptor substrate 15        | EPS15    | 151440000 | INFINITE |
| Q3SY69 | Mitochondrial 10-formyltetrahydrofolate dehydrog     | ALDH1L2  | 151350000 | INFINITE |
| Q8N5M4 | Tetratricopeptide repeat protein 9C                  | TTC9C    | 151300000 | INFINITE |
| P62834 | Ras-related protein Rap-1A                           | RAP1A    | 151240000 | INFINITE |
| Q9Y6A5 | Transforming acidic coiled-coil-containing protein 3 | TACC3    | 150870000 | INFINITE |
| Q9NRG1 | Phosphoribosyltransferase domain-containing prot     | PRTFDC1  | 150180000 | INFINITE |
| Q8N8N7 | Prostaglandin reductase 2                            | PTGR2    | 149520000 | INFINITE |
| O75608 | Acyl-protein thioesterase 1                          | LYPLA1   | 149200000 | INFINITE |
| Q9BV57 | 1,2-dihydroxy-3-keto-5-methylthiopentene dioxyl      | ADI1     | 148040000 | INFINITE |
| Q13017 | Rho GTPase-activating protein 5                      | ARHGAP5  | 147900000 | INFINITE |
| O14653 | Golgi SNAP receptor complex member 2                 | GOSR2    | 147590000 | INFINITE |
| Q8NEU8 | DCC-interacting protein 13-beta                      | APPL2    | 147380000 | INFINITE |
| O14548 | Cytochrome c oxidase subunit 7A-related protein,     | COX7A2L  | 146880000 | INFINITE |
| Q14197 | Peptidyl-tRNA hydrolase ICT1, mitochondrial          | ICT1     | 146440000 | INFINITE |
| Q14126 | Desmoglein-2                                         | DSG2     | 145890000 | INFINITE |
| P49356 | Protein farnesyltransferase subunit beta             | FNTB     | 145460000 | INFINITE |
| P16278 | Beta-galactosidase                                   | GLB1     | 145460000 | INFINITE |
| Q9NX74 | tRNA-dihydrouridine(20) synthase [NAD(P)+]-like      | DUS2     | 145180000 | INFINITE |
| P12694 | 2-oxoisovalerate dehydrogenase subunit alpha, mi     | BCKDHA   | 145140000 | INFINITE |
| Q6UWP7 | Lysocardiolipin acyltransferase 1                    | LCLAT1   | 143920000 | INFINITE |
| Q6PD74 | Alpha- and gamma-adaptin-binding protein p34         | AAGAB    | 143200000 | INFINITE |
| Q9UEE9 | Craniofacial development protein 1                   | CFDP1    | 142930000 | INFINITE |
| O00625 | Pirin                                                | PIR      | 142680000 | INFINITE |
| Q15121 | Astrocytic phosphoprotein PEA-15                     | PEA15    | 142470000 | INFINITE |
| Q9NZZ3 | Charged multivesicular body protein 5                | CHMP5    | 141930000 | INFINITE |
| P27487 | Dipeptidyl peptidase 4;Dipeptidyl peptidase 4 men    | DPP4     | 141330000 | INFINITE |
| Q9UGP4 | LIM domain-containing protein 1                      | LIMD1    | 141060000 | INFINITE |
| Q15833 | Syntaxin-binding protein 2                           | STXBP2   | 140990000 | INFINITE |
| Q8WWV3 | Reticulon-4-interacting protein 1, mitochondrial     | RTN4IP1  | 140470000 | INFINITE |
| Q9H0C8 | Integrin-linked kinase-associated serine/threonine   | ILKAP    | 140150000 | INFINITE |
| Q9BSV6 | tRNA-splicing endonuclease subunit Sen34             | TSEN34   | 139980000 | INFINITE |
| Q6IA86 | Elongator complex protein 2                          | ELP2     | 139910000 | INFINITE |
| Q15102 | Platelet-activating factor acetylhydrolase IB subuni | PAFAH1B3 | 139860000 | INFINITE |
| Q6IAA8 | Ragulator complex protein LAMTOR1                    | LAMTOR1  | 139740000 | INFINITE |
| P52948 | Nuclear pore complex protein Nup98-Nup96;Nucle       | NUP98    | 139650000 | INFINITE |
| Q05397 | Focal adhesion kinase 1                              | PTK2     | 139290000 | INFINITE |
| Q9NVH1 | DnaJ homolog subfamily C member 11                   | DNAJC11  | 139200000 | INFINITE |



|        |                                                     |          |                  |          |
|--------|-----------------------------------------------------|----------|------------------|----------|
| Q9UHI6 | Sedoheptulokinase                                   | SHPK     | 139140000        | INFINITE |
| Q9NPD8 | Ubiquitin-conjugating enzyme E2 T                   | UBE2T    | 138640000        | INFINITE |
| O43617 | Trafficking protein particle complex subunit 3      | TRAPPC3  | 138550000        | INFINITE |
| Q96EY4 | Translation machinery-associated protein 16         | TMA16    | 138460000        | INFINITE |
| P36406 | E3 ubiquitin-protein ligase TRIM23                  | TRIM23   | 138450000        | INFINITE |
| Q8N5M1 | ATP synthase mitochondrial F1 complex assembly      | ATPAF2   | 138430000        | INFINITE |
| O75431 | Metaxin-2                                           | MTX2     | 138200000        | INFINITE |
| O43752 | Syntaxin-6                                          | STX6     | 138160000        | INFINITE |
| P04183 | Thymidine kinase, cytosolic                         | TK1      | 137370000        | INFINITE |
| Q9UID3 | Vacuolar protein sorting-associated protein 51 hor  | VPS51    | 136890000        | INFINITE |
| P45877 | Peptidyl-prolyl cis-trans isomerase C               | PPIC     | 136880000        | INFINITE |
| P49459 | Ubiquitin-conjugating enzyme E2 A                   | UBE2A    | 136730000        | INFINITE |
| Q9H4A5 | Golgi phosphoprotein 3-like                         | GOLPH3L  | 136720000        | INFINITE |
| O43395 | U4/U6 small nuclear ribonucleoprotein Prp3          | PRPF3    | 136500000        | INFINITE |
| P20336 | Ras-related protein Rab-3A                          | RAB3A    | 136460000        | INFINITE |
| O95182 | NADH dehydrogenase [ubiquinone] 1 alpha subcor      | NDUFA7   | 136320000        | INFINITE |
| Q9NXV2 | BTB/POZ domain-containing protein KCTD5             | KCTD5    | 136020000        | INFINITE |
| A0MZ66 | Shootin-1                                           | KIAA1598 | 135980000        | INFINITE |
| Q8NCN5 | Pyruvate dehydrogenase phosphatase regulatory s     | PDPR     | 135960000        | INFINITE |
| Q7Z3J2 | UPF0505 protein C16orf62                            | C16orf62 | 135780000        | INFINITE |
| O15382 | Branched-chain-amino-acid aminotransferase, mit     | BCAT2    | 135370000        | INFINITE |
| O14656 | Torsin-1A                                           | TOR1A    | 135230000        | INFINITE |
| Q96GQ5 | RUS1 family protein C16orf58                        | C16orf58 | 135200000        | INFINITE |
| Q9P253 | Vacuolar protein sorting-associated protein 18 hor  | VPS18    | 134200000        | INFINITE |
| Q2NKX8 | DNA excision repair protein ERCC-6-like             | ERCC6L   | 134110000        | INFINITE |
| Q9UL25 | Ras-related protein Rab-21                          | RAB21    | 133900000        | INFINITE |
| O75150 | E3 ubiquitin-protein ligase BRE1B                   | RNF40    | 133810000        | INFINITE |
| Q96S55 | ATPase WRNIP1                                       | WRNIP1   | 133700000        | INFINITE |
| Q9BUT1 | 3-hydroxybutyrate dehydrogenase type 2              | BDH2     | 133600000        | INFINITE |
| Q9P260 | LisH domain and HEAT repeat-containing protein K    | KIAA1468 | 133450000        | INFINITE |
| P42356 | Phosphatidylinositol 4-kinase alpha                 | PI4KA    | 133290000        | INFINITE |
| P10606 | Cytochrome c oxidase subunit 5B, mitochondrial      | COX5B    | 133130000        | INFINITE |
| Q9H1B7 | Interferon regulatory factor 2-binding protein-like | IRF2BPL  | 133010000        | INFINITE |
| Q9NS86 | LanC-like protein 2                                 | LANCL2   | 132230000        | INFINITE |
| P27701 | CD82 antigen                                        | CD82     | 132170000        | INFINITE |
| Q6P161 | 39S ribosomal protein L54, mitochondrial            | MRPL54   | 132160000        | INFINITE |
| Q9BT73 | Proteasome assembly chaperone 3                     | PSMG3    | 132020000        | INFINITE |
| O60231 | Putative pre-mRNA-splicing factor ATP-dependent     | DHX16    | 131940000        | INFINITE |
| P06702 | Protein S100-A9                                     | S100A9   | 131930000        | INFINITE |
| Q9NX47 | E3 ubiquitin-protein ligase MARCH5                  |          | Mar-05 131280000 | INFINITE |
| Q9Y6N1 | Cytochrome c oxidase assembly protein COX11, mi     | COX11    | 130710000        | INFINITE |
| Q9BY42 | Protein RTF2 homolog                                | RTFDC1   | 130700000        | INFINITE |
| P04424 | Argininosuccinate lyase                             | ASL      | 130650000        | INFINITE |
| O94966 | Ubiquitin carboxyl-terminal hydrolase 19            | USP19    | 129760000        | INFINITE |
| P31751 | RAC-beta serine/threonine-protein kinase            | AKT2     | 129170000        | INFINITE |
| Q8TBX8 | Phosphatidylinositol 5-phosphate 4-kinase type-2    | PIP4K2C  | 128950000        | INFINITE |
| P55327 | Tumor protein D52                                   | TPD52    | 128350000        | INFINITE |
| Q9UNW1 | Multiple inositol polyphosphate phosphatase 1       | MINPP1   | 128230000        | INFINITE |
| Q5VT52 | Regulation of nuclear pre-mRNA domain-containin     | RPRD2    | 128180000        | INFINITE |
| P08581 | Hepatocyte growth factor receptor                   | MET      | 128100000        | INFINITE |

|           |                                                     |                |           |          |
|-----------|-----------------------------------------------------|----------------|-----------|----------|
| Q15398    | Disks large-associated protein 5                    | DLGAP5         | 128080000 | INFINITE |
| Q9H446    | RWD domain-containing protein 1                     | RWDD1          | 127980000 | INFINITE |
| P42858    | Huntingtin                                          | HTT            | 127370000 | INFINITE |
| P78540    | Arginase-2, mitochondrial                           | ARG2           | 127180000 | INFINITE |
| O00233    | 26S proteasome non-ATPase regulatory subunit 9      | PSMD9          | 126970000 | INFINITE |
| Q01415    | N-acetylgalactosamine kinase                        | GALK2          | 126860000 | INFINITE |
| Q16763    | Ubiquitin-conjugating enzyme E2 S                   | UBE2S          | 126550000 | INFINITE |
| Q8N9N8    | Probable RNA-binding protein EIF1AD                 | EIF1AD         | 125860000 | INFINITE |
| P24386    | Rab proteins geranylgeranyltransferase componen     | CHM            | 125170000 | INFINITE |
| Q9NVX2    | Notchless protein homolog 1                         | NLE1           | 125140000 | INFINITE |
| A3KMH1    | von Willebrand factor A domain-containing proteir   | VWA8           | 125090000 | INFINITE |
| Q9UQ16    | Dynamin-3                                           | DNM3           | 124900000 | INFINITE |
| O14735    | CDP-diacylglycerol--inositol 3-phosphatidyltransfer | CDIPT          | 124730000 | INFINITE |
| Q5JSH3    | WD repeat-containing protein 44                     | WDR44          | 124540000 | INFINITE |
| Q9NRK6    | ATP-binding cassette sub-family B member 10, mit    | ABCB10         | 124490000 | INFINITE |
| Q15139    | Serine/threonine-protein kinase D1                  | PRKD1          | 124230000 | INFINITE |
| Q14691    | DNA replication complex GINS protein PSF1           | GINS1          | 124230000 | INFINITE |
| Q9H269    | Vacuolar protein sorting-associated protein 16 hor  | VPS16          | 124090000 | INFINITE |
| O60830    | Mitochondrial import inner membrane translocase     | TIMM17B        | 123760000 | INFINITE |
| Q9NVT9    | Armadillo repeat-containing protein 1               | ARMC1          | 123630000 | INFINITE |
| Q13641    | Trophoblast glycoprotein                            | TPBG           | 123230000 | INFINITE |
| Q9NXR1;Q  | Nuclear distribution protein nudE homolog 1;Nucl    | NDE1;NDEL1     | 123140000 | INFINITE |
| Q86TU7    | Histone-lysine N-methyltransferase setd3            | SETD3          | 123020000 | INFINITE |
| A0A024R1F | Translation machinery-associated protein 7          | hCG_2014768;TM | 122890000 | INFINITE |
| O95881    | Thioredoxin domain-containing protein 12            | TXNDC12        | 122570000 | INFINITE |
| C4AMC7;Q  | Putative WAS protein family homolog 3;WAS prote     | WASH3P;WASH2P  | 122430000 | INFINITE |
| Q8TDQ7    | Glucosamine-6-phosphate isomerase 2                 | GNPDA2         | 122410000 | INFINITE |
| O75976    | Carboxypeptidase D                                  | CPD            | 122120000 | INFINITE |
| Q9BYV8    | Centrosomal protein of 41 kDa                       | CEP41          | 121420000 | INFINITE |
| P40692    | DNA mismatch repair protein Mlh1                    | MLH1           | 121290000 | INFINITE |
| Q9BZE9    | Tether containing UBX domain for GLUT4              | ASPSR1         | 120840000 | INFINITE |
| Q13740    | CD166 antigen                                       | ALCAM          | 120740000 | INFINITE |
| Q8IUR7    | Armadillo repeat-containing protein 8               | ARMC8          | 120390000 | INFINITE |
| Q9GZN8    | UPF0687 protein C20orf27                            | C20orf27       | 120370000 | INFINITE |
| Q8TD16    | Protein bicaudal D homolog 2                        | BICD2          | 120090000 | INFINITE |
| O75496    | Geminin                                             | GMNN           | 120060000 | INFINITE |
| P61916    | Epididymal secretory protein E1                     | NPC2           | 119960000 | INFINITE |
| Q9Y314    | Nitric oxide synthase-interacting protein           | NOSIP          | 119660000 | INFINITE |
| Q96CP2    | FLYWCH family member 2                              | FLYWCH2        | 119520000 | INFINITE |
| Q0VGL1    | Ragulator complex protein LAMTOR4;Ragulator co      | LAMTOR4        | 118980000 | INFINITE |
| Q8TDZ2    | Protein-methionine sulfoxide oxidase MICAL1         | MICAL1         | 118880000 | INFINITE |
| Q8WTW3    | Conserved oligomeric Golgi complex subunit 1        | COG1           | 118680000 | INFINITE |
| P78318    | Immunoglobulin-binding protein 1                    | IGBP1          | 118680000 | INFINITE |
| Q9Y4K4    | Mitogen-activated protein kinase kinase kinase kin  | MAP4K5         | 118470000 | INFINITE |
| Q86UY8    | 5-nucleotidase domain-containing protein 3          | NT5DC3         | 118460000 | INFINITE |
| O43660    | Pleiotropic regulator 1                             | PLRG1          | 118260000 | INFINITE |
| Q92636    | Protein FAN                                         | NSMAF          | 117950000 | INFINITE |
| Q9UM54    | Unconventional myosin-VI                            | MYO6           | 117670000 | INFINITE |
| O75794    | Cell division cycle protein 123 homolog             | CDC123         | 117610000 | INFINITE |
| Q5SY16    | Polynucleotide 5-hydroxyl-kinase NOL9               | NOL9           | 117450000 | INFINITE |

|                                  |                                                      |                   |           |          |
|----------------------------------|------------------------------------------------------|-------------------|-----------|----------|
| Q9UBN6                           | Tumor necrosis factor receptor superfamily memb      | TNFRSF10D         | 117170000 | INFINITE |
| O43678                           | NADH dehydrogenase [ubiquinone] 1 alpha subcor       | NDUFA2            | 116610000 | INFINITE |
| Q05639                           | Elongation factor 1-alpha 2                          | EEF1A2            | 116070000 | INFINITE |
| Q96G28                           | Cilia- and flagella-associated protein 36            | CFAP36            | 115840000 | INFINITE |
| Q93052                           | Lipoma-preferred partner                             | LPP               | 115670000 | INFINITE |
| P20839                           | Inosine-5-monophosphate dehydrogenase 1              | IMPDH1            | 115600000 | INFINITE |
| Q9NVG8                           | TBC1 domain family member 13                         | TBC1D13           | 114900000 | INFINITE |
| Q86S22                           | Trafficking protein particle complex subunit 6B      | TRAPPC6B          | 114700000 | INFINITE |
| P40306                           | Proteasome subunit beta type-10                      | PSMB10            | 114680000 | INFINITE |
| Q8N122                           | Regulatory-associated protein of mTOR                | RPTOR             | 114340000 | INFINITE |
| Q96P48                           | Arf-GAP with Rho-GAP domain, ANK repeat and Pf       | ARAP1             | 113570000 | INFINITE |
| Q9Y3P9                           | Rab GTPase-activating protein 1                      | RABGAP1           | 113520000 | INFINITE |
| P83436                           | Conserved oligomeric Golgi complex subunit 7         | COG7              | 113290000 | INFINITE |
| P28062                           | Proteasome subunit beta type-8                       | PSMB8             | 113040000 | INFINITE |
| P05106                           | Integrin beta-3                                      | ITGB3             | 113000000 | INFINITE |
| Q9P0J1                           | [Pyruvate dehydrogenase [acetyl-transferring]]-ph    | PDP1              | 112770000 | INFINITE |
| Q7Z434                           | Mitochondrial antiviral-signaling protein            | MAVS              | 112720000 | INFINITE |
| O00330                           | Pyruvate dehydrogenase protein X component, mi       | PDHX              | 112670000 | INFINITE |
| Q7Z422                           | SUZ domain-containing protein 1                      | SZRD1             | 112350000 | INFINITE |
| Q9H3H3                           | UPF0696 protein C11orf68                             | C11orf68          | 112260000 | INFINITE |
| P32929                           | Cystathionine gamma-lyase                            | CTH               | 111910000 | INFINITE |
| P29083                           | General transcription factor IIE subunit 1           | GTF2E1            | 111870000 | INFINITE |
| Q14344                           | Guanine nucleotide-binding protein subunit alpha-    | GNA13             | 111710000 | INFINITE |
| Q96BW5                           | Phosphotriesterase-related protein                   | PTER              | 111480000 | INFINITE |
| P18583                           | Protein SON                                          | SON               | 111440000 | INFINITE |
| Q9UBB9                           | Tuftelin-interacting protein 11                      | TFIP11            | 111360000 | INFINITE |
| Q9NW82                           | WD repeat-containing protein 70                      | WDR70             | 110540000 | INFINITE |
| P61970                           | Nuclear transport factor 2                           | NUTF2             | 108670000 | INFINITE |
| O15020                           | Spectrin beta chain, non-erythrocytic 2              | SPTBN2            | 108620000 | INFINITE |
| O60637                           | Tetraspanin-3                                        | TSPAN3            | 108100000 | INFINITE |
| Q8N108                           | Mesoderm induction early response protein 1          | MIER1             | 107990000 | INFINITE |
| O75127                           | Pentatricopeptide repeat-containing protein 1, mit   | PTCD1             | 107280000 | INFINITE |
| Q9UL45                           | Biogenesis of lysosome-related organelles comple     | BLOC1S6           | 107090000 | INFINITE |
| Q12840                           | Kinesin heavy chain isoform 5A                       | KIF5A             | 106390000 | INFINITE |
| Q5JPH6                           | Probable glutamate--tRNA ligase, mitochondrial       | EARS2             | 106330000 | INFINITE |
| Q8N1G2                           | Cap-specific mRNA (nucleoside-2-O-)-methyltransf     | CMTR1             | 106270000 | INFINITE |
| Q9Y2J2                           | Band 4.1-like protein 3;Band 4.1-like protein 3, N-t | EPB41L3           | 106110000 | INFINITE |
| Q9HBK9                           | Arsenite methyltransferase                           | AS3MT             | 105570000 | INFINITE |
| Q7Z3E5                           | LisH domain-containing protein ARMC9                 | ARMC9             | 105040000 | INFINITE |
| P13591                           | Neural cell adhesion molecule 1                      | NCAM1             | 104670000 | INFINITE |
| Q8NBN3                           | Transmembrane protein 87A                            | TMEM87A           | 104480000 | INFINITE |
| Q6UW63                           | KDEL motif-containing protein 1                      | KDEL1C1           | 104270000 | INFINITE |
| O95208                           | Epsin-2                                              | EPN2              | 104120000 | INFINITE |
| Q9BUR5                           | Apolipoprotein O                                     | APOO              | 103650000 | INFINITE |
| P16383                           | GC-rich sequence DNA-binding factor 2                | GCFC2             | 103570000 | INFINITE |
| Q13445                           | Transmembrane emp24 domain-containing protei         | TMED1             | 103560000 | INFINITE |
| P51580                           | Thiopurine S-methyltransferase                       | TPMT              | 103450000 | INFINITE |
| A0A0C4DH67;A0A0C4DH69;A0A075B6S5 |                                                      | IGKV1-8;IGKV1-9;I | 103400000 | INFINITE |
| Q00403                           | Transcription initiation factor IIB                  | GTF2B             | 103330000 | INFINITE |
| O75600                           | 2-amino-3-ketobutyrate coenzyme A ligase, mitoc      | GCAT              | 103300000 | INFINITE |

|          |                                                                    |                 |           |          |
|----------|--------------------------------------------------------------------|-----------------|-----------|----------|
| P50897   | Palmitoyl-protein thioesterase 1                                   | PPT1            | 103200000 | INFINITE |
| Q9UPN9   | E3 ubiquitin-protein ligase TRIM33                                 | TRIM33          | 102970000 | INFINITE |
| P62328   | Thymosin beta-4;Hematopoietic system regulatory                    | TMSB4X          | 102870000 | INFINITE |
| Q08722   | Leukocyte surface antigen CD47                                     | CD47            | 102830000 | INFINITE |
| P54725   | UV excision repair protein RAD23 homolog A                         | RAD23A          | 102560000 | INFINITE |
| Q9H7F0   | Probable cation-transporting ATPase 13A3                           | ATP13A3         | 102450000 | INFINITE |
| P51784   | Ubiquitin carboxyl-terminal hydrolase 11                           | USP11           | 102450000 | INFINITE |
| O43347   | RNA-binding protein Musashi homolog 1                              | MSI1            | 102010000 | INFINITE |
| Q9NV88   | Integrator complex subunit 9                                       | INTS9           | 101840000 | INFINITE |
| Q6A1A2;O | Putative 3-phosphoinositide-dependent protein kinase               | PDPK2P;PDPK1    | 101660000 | INFINITE |
| Q9NX62   | Inositol monophosphatase 3                                         | IMPAD1          | 101280000 | INFINITE |
| Q6P3W7   | SCY1-like protein 2                                                | SCYL2           | 101250000 | INFINITE |
| Q96FZ7   | Charged multivesicular body protein 6                              | CHMP6           | 101190000 | INFINITE |
| Q8N9F7   | Glycerophosphodiester phosphodiesterase domain                     | GDPD1           | 101090000 | INFINITE |
| O60934   | Nibrin                                                             | NBN             | 100910000 | INFINITE |
| P51965   | Ubiquitin-conjugating enzyme E2 E1                                 | UBE2E1          | 100710000 | INFINITE |
| Q14627   | Interleukin-13 receptor subunit alpha-2                            | IL13RA2         | 100640000 | INFINITE |
| P51649   | Succinate-semialdehyde dehydrogenase, mitochondrial                | ALDH5A1         | 100630000 | INFINITE |
| Q96I51   | Williams-Beuren syndrome chromosomal region 11q24                  | WBSCR16         | 100310000 | INFINITE |
| P09001   | 39S ribosomal protein L3, mitochondrial                            | MRPL3           | 99514000  | INFINITE |
| O96013   | Serine/threonine-protein kinase PAK 4                              | PAK4            | 99374000  | INFINITE |
| O14618   | Copper chaperone for superoxide dismutase                          | CCS             | 99228000  | INFINITE |
| Q96H20   | Vacuolar-sorting protein SNF8                                      | SNF8            | 99069000  | INFINITE |
| P61803   | Dolichyl-diphosphooligosaccharide--protein glycosyltransferase 1   | DAD1            | 98915000  | INFINITE |
| Q7L5Y1   | Mitochondrial enolase superfamily member 1                         | ENOSF1          | 98633000  | INFINITE |
| O95167   | NADH dehydrogenase [ubiquinone] 1 alpha subunit                    | NDUFA3          | 98381000  | INFINITE |
| Q9Y2R0   | Cytochrome c oxidase assembly factor 3 homolog, COA3               |                 | 98363000  | INFINITE |
| Q6UX04   | Peptidyl-prolyl cis-trans isomerase CWC27 homolog                  | CWC27           | 98295000  | INFINITE |
| Q86YN1   | Dolichyldiphosphatase 1                                            | DOLPP1          | 98295000  | INFINITE |
| Q9BVA0   | Katanin p80 WD40 repeat-containing subunit B1                      | KATNB1          | 98145000  | INFINITE |
| Q969U7   | Proteasome assembly chaperone 2                                    | PSMG2           | 97794000  | INFINITE |
| Q9BTX1   | Nucleoporin NDC1                                                   | NDC1            | 97763000  | INFINITE |
| Q07864   | DNA polymerase epsilon catalytic subunit A                         | POLE            | 97614000  | INFINITE |
| Q9H788   | SH2 domain-containing protein 4A                                   | SH2D4A          | 97596000  | INFINITE |
| Q96CV9   | Optineurin                                                         | OPTN            | 97525000  | INFINITE |
| Q03252   | Lamin-B2                                                           | LMNB2           | 97463000  | INFINITE |
| O75879   | Glutamyl-tRNA(Gln) amidotransferase subunit B, nuclear             | GATB            | 97462000  | INFINITE |
| Q8TB52   | F-box only protein 30                                              | FBXO30          | 97386000  | INFINITE |
| Q8WXE9   | Stonin-2                                                           | STON2           | 97258000  | INFINITE |
| O00423   | Echinoderm microtubule-associated protein-like 1                   | EML1            | 96816000  | INFINITE |
| O95260   | Arginyl-tRNA--protein transferase 1                                | ATE1            | 96780000  | INFINITE |
| Q5TBB1   | Ribonuclease H2 subunit B                                          | RNASEH2B        | 96560000  | INFINITE |
| Q9H0P0   | Cytosolic 5-nucleotidase 3A                                        | NT5C3A          | 96496000  | INFINITE |
| Q8NCG7   | Sn1-specific diacylglycerol lipase beta                            | DAGLB           | 96476000  | INFINITE |
| A1A4S6   | Rho GTPase-activating protein 10                                   | ARHGAP10        | 96470000  | INFINITE |
| Q7L592   | NADH dehydrogenase [ubiquinone] complex I, assembly factor 7       | NDUFA7          | 95927000  | INFINITE |
| Q15628   | Tumor necrosis factor receptor type 1-associated 1                 | TRADD           | 95900000  | INFINITE |
| Q96BP3   | Peptidylprolyl isomerase domain and WD repeat-containing protein 1 | PPWD1           | 95866000  | INFINITE |
| Q9UDX4;O | SEC14-like protein 3;SEC14-like protein 2                          | SEC14L3;SEC14L2 | 95841000  | INFINITE |
| Q969N2   | GPI transamidase component PIG-T                                   | PIGT            | 95806000  | INFINITE |

|           |                                                                  |          |          |          |
|-----------|------------------------------------------------------------------|----------|----------|----------|
| Q9BVM2    | Protein DPCD                                                     | DPCD     | 95688000 | INFINITE |
| Q96EY5    | Multivesicular body subunit 12A                                  | MVB12A   | 95628000 | INFINITE |
| A1X283    | SH3 and PX domain-containing protein 2B                          | SH3PXD2B | 95420000 | INFINITE |
| O15056    | Synaptojanin-2                                                   | SYNJ2    | 95262000 | INFINITE |
| Q86WB0    | Nuclear-interacting partner of ALK                               | ZC3HC1   | 95220000 | INFINITE |
| P52758    | Ribonuclease UK114                                               | HRSP12   | 95169000 | INFINITE |
| Q9Y3C8    | Ubiquitin-fold modifier-conjugating enzyme 1                     | UFC1     | 95168000 | INFINITE |
| Q8IWW7    | E3 ubiquitin-protein ligase UBR1                                 | UBR1     | 95021000 | INFINITE |
| Q86X76    | Nitrilase homolog 1                                              | NIT1     | 95016000 | INFINITE |
| Q99447    | Ethanolamine-phosphate cytidyltransferase                        | PCYT2    | 94826000 | INFINITE |
| Q96BJ3    | Axin interactor, dorsalization-associated protein                | AIDA     | 94780000 | INFINITE |
| Q8NB37    | Parkinson disease 7 domain-containing protein 1                  | PDDC1    | 94425000 | INFINITE |
| Q53HC9    | Protein TSSC1                                                    | TSSC1    | 93741000 | INFINITE |
| Q9H9C1    | Spermatogenesis-defective protein 39 homolog                     | VIPAS39  | 93410000 | INFINITE |
| P00414    | Cytochrome c oxidase subunit 3                                   | MT-CO3   | 93362000 | INFINITE |
| O75884    | Putative hydrolase RBBP9                                         | RBBP9    | 93254000 | INFINITE |
| Q8IYS1    | Peptidase M20 domain-containing protein 2                        | PM20D2   | 93235000 | INFINITE |
| P06865    | Beta-hexosaminidase subunit alpha                                | HEXA     | 93004000 | INFINITE |
| Q15526    | Surfeit locus protein 1                                          | SURF1    | 92939000 | INFINITE |
| Q9H5N1    | Rab GTPase-binding effector protein 2                            | RABEP2   | 92858000 | INFINITE |
| P33527    | Multidrug resistance-associated protein 1                        | ABCC1    | 92755000 | INFINITE |
| Q8TF66    | Leucine-rich repeat-containing protein 15                        | LRRC15   | 92388000 | INFINITE |
| O15305    | Phosphomannomutase 2                                             | PMM2     | 92052000 | INFINITE |
| Q9HBM6;Q  | Transcription initiation factor TFIID subunit 9B;TraI TAF9B;TAF9 |          | 91895000 | INFINITE |
| Q9HCS7    | Pre-mRNA-splicing factor SYF1                                    | XAB2     | 91792000 | INFINITE |
| Q9BTZ2;P0 | Dehydrogenase/reductase SDR family member 4;P DHRS4;DHRS4L1      |          | 91507000 | INFINITE |
| O14933    | Ubiquitin/ISG15-conjugating enzyme E2 L6                         | UBE2L6   | 91153000 | INFINITE |
| O15294    | UDP-N-acetylglucosamine--peptide N-acetylglucos                  | OGT      | 91055000 | INFINITE |
| Q15843    | NEDD8                                                            | NEDD8    | 90901000 | INFINITE |
| O14802    | DNA-directed RNA polymerase III subunit RPC1                     | POLR3A   | 90876000 | INFINITE |
| P78356    | Phosphatidylinositol 5-phosphate 4-kinase type-2 I               | PIP4K2B  | 90266000 | INFINITE |
| Q5VZE5    | N-alpha-acetyltransferase 35, NatC auxiliary subun               | NAA35    | 89965000 | INFINITE |
| Q8IYQ7    | Threonine synthase-like 1                                        | THNSL1   | 89667000 | INFINITE |
| O95671    | N-acetylserotonin O-methyltransferase-like protei                | ASMTL    | 89379000 | INFINITE |
| P80217    | Interferon-induced 35 kDa protein                                | IFI35    | 89159000 | INFINITE |
| Q9UFC0    | Leucine-rich repeat and WD repeat-containing pro                 | LRWD1    | 89072000 | INFINITE |
| Q9NRP0    | Oligosaccharyltransferase complex subunit OSTC                   | OSTC     | 88912000 | INFINITE |
| O75449    | Katanin p60 ATPase-containing subunit A1                         | KATNA1   | 88811000 | INFINITE |
| Q9NUT2    | ATP-binding cassette sub-family B member 8, mito                 | ABCB8    | 88515000 | INFINITE |
| Q96SZ6    | CDK5 regulatory subunit-associated protein 1                     | CDK5RAP1 | 88104000 | INFINITE |
| O75629    | Protein CREG1                                                    | CREG1    | 88056000 | INFINITE |
| Q9HOW8    | Protein SMG9                                                     | SMG9     | 87720000 | INFINITE |
| Q9UMR2    | ATP-dependent RNA helicase DDX19B                                | DDX19B   | 87581000 | INFINITE |
| Q8IV08    | Phospholipase D3                                                 | PLD3     | 87501000 | INFINITE |
| P57105    | Synaptojanin-2-binding protein                                   | SYNJ2BP  | 87431000 | INFINITE |
| Q9C040    | Tripartite motif-containing protein 2                            | TRIM2    | 87402000 | INFINITE |
| P18615    | Negative elongation factor E                                     | NELFE    | 87370000 | INFINITE |
| P61769    | Beta-2-microglobulin;Beta-2-microglobulin form pl                | B2M      | 87301000 | INFINITE |
| Q9UGJ0    | 5-AMP-activated protein kinase subunit gamma-2                   | PRKAG2   | 86938000 | INFINITE |
| O95470    | Sphingosine-1-phosphate lyase 1                                  | SGPL1    | 86381000 | INFINITE |

|                   |                                                              |               |                 |          |
|-------------------|--------------------------------------------------------------|---------------|-----------------|----------|
| P42575            | Caspase-2;Caspase-2 subunit p18;Caspase-2 subur              | CASP2         | 86292000        | INFINITE |
| Q92930            | Ras-related protein Rab-8B                                   | RAB8B         | 86241000        | INFINITE |
| Q8N2G8            | GH3 domain-containing protein                                | GHDC          | 85828000        | INFINITE |
| Q9Y223            | Bifunctional UDP-N-acetylglucosamine 2-epimeras              | GNE           | 85535000        | INFINITE |
| PODSN7;A0A075B6S9 |                                                              | IGKV1D-37     | 85253000        | INFINITE |
| P47929            | Galectin-7                                                   | LGALS7        | 85160000        | INFINITE |
| Q8ND76            | Cyclin-Y                                                     | CCNY          | 85005000        | INFINITE |
| Q7Z5K2            | Wings apart-like protein homolog                             | WAPAL         | 84931000        | INFINITE |
| Q9NSK0            | Kinesin light chain 4                                        | KLC4          | 84892000        | INFINITE |
| Q96J01            | THO complex subunit 3                                        | THOC3         | 84841000        | INFINITE |
| O43402            | ER membrane protein complex subunit 8                        | EMC8          | 84749000        | INFINITE |
| Q86XI8            | Uncharacterized protein C19orf68                             | C19orf68      | 84623000        | INFINITE |
| Q96BH1            | E3 ubiquitin-protein ligase RNF25                            | RNF25         | 84552000        | INFINITE |
| Q7Z5L9            | Interferon regulatory factor 2-binding protein 2             | IRF2BP2       | 84505000        | INFINITE |
| O43929            | Origin recognition complex subunit 4                         | ORC4          | 84038000        | INFINITE |
| P22413            | Ectonucleotide pyrophosphatase/phosphodiesterase             | ENPP1         | 83942000        | INFINITE |
| Q4G0N4            | NAD kinase 2, mitochondrial                                  | NADK2         | 83782000        | INFINITE |
| Q96Q15            | Serine/threonine-protein kinase SMG1                         | SMG1          | 83693000        | INFINITE |
| Q96EV2            | RNA-binding protein 33                                       | RBM33         | 83618000        | INFINITE |
| Q7Z4G4            | tRNA (guanine(10)-N2)-methyltransferase homolog              | TRMT11        | 83497000        | INFINITE |
| P05026            | Sodium/potassium-transporting ATPase subunit beta            | ATP1B1        | 83448000        | INFINITE |
| Q9HD15            | Steroid receptor RNA activator 1                             | SRA1          | 83281000        | INFINITE |
| Q9BWS9            | Chitinase domain-containing protein 1                        | CHID1         | 83252000        | INFINITE |
| O43815            | Striatin                                                     | STRN          | 83225000        | INFINITE |
| Q86SF2            | N-acetylgalactosaminyltransferase 7                          | GALNT7        | 83200000        | INFINITE |
| P23025            | DNA repair protein complementing XP-A cells                  | XPA           | 83175000        | INFINITE |
| O15431            | High affinity copper uptake protein 1                        | SLC31A1       | 83083000        | INFINITE |
| Q9BZJ0            | Crooked neck-like protein 1                                  | CRNKL1        | 83049000        | INFINITE |
| P23497            | Nuclear autoantigen Sp-100                                   | SP100         | 82991000        | INFINITE |
| Q8N4V1            | Membrane magnesium transporter 1                             | MMGT1         | 82853000        | INFINITE |
| Q9Y4P8            | WD repeat domain phosphoinositide-interacting protein        | WIPI2         | 82186000        | INFINITE |
| P48163            | NADP-dependent malic enzyme                                  | ME1           | 81929000        | INFINITE |
| Q96PU5            | E3 ubiquitin-protein ligase NEDD4-like                       | NEDD4L        | 81576000        | INFINITE |
| Q9H201            | Epsin-3                                                      | EPN3          | 81546000        | INFINITE |
| Q8NBF6            | Late secretory pathway protein AVL9 homolog                  | AVL9          | 81496000        | INFINITE |
| Q13362            | Serine/threonine-protein phosphatase 2A 56 kDa isoform alpha | PPP2R5C       | 81234000        | INFINITE |
| Q969G6            | Riboflavin kinase                                            | RFK           | 81209000        | INFINITE |
| Q4G176            | Acyl-CoA synthetase family member 3, mitochondrial           | ACSF3         | 80713000        | INFINITE |
| Q8NBI5            | Solute carrier family 43 member 3                            | SLC43A3       | 80548000        | INFINITE |
| Q13642            | Four and a half LIM domains protein 1                        | FHL1          | 80439000        | INFINITE |
| Q8N4P3            | Guanosine-3,5-bis(diphosphate) 3-pyrophosphohydrolase        | HDDC3         | 80305000        | INFINITE |
| Q4G0F5            | Vacuolar protein sorting-associated protein 26B              | VPS26B        | 80231000        | INFINITE |
| Q6NYC8            | Phostensin                                                   | PPP1R18       | 79719000        | INFINITE |
| Q14141            | Septin-6                                                     |               | Sep-06 79643000 | INFINITE |
| Q6P158            | Putative ATP-dependent RNA helicase DHX57                    | DHX57         | 79457000        | INFINITE |
| Q16877;P1         | 6-phosphofructo-2-kinase/fructose-2,6-bisphosphatase         | PFKFB4;PFKFB1 | 79420000        | INFINITE |
| Q9Y4X5            | E3 ubiquitin-protein ligase ARIH1                            | ARIH1         | 79193000        | INFINITE |
| Q86U90            | YrdC domain-containing protein, mitochondrial                | YRDC          | 78935000        | INFINITE |
| Q92504            | Zinc transporter SLC39A7                                     | SLC39A7       | 78807000        | INFINITE |
| Q9BXW9            | Fanconi anemia group D2 protein                              | FANCD2        | 78644000        | INFINITE |

|               |                                                                                 |                     |          |          |
|---------------|---------------------------------------------------------------------------------|---------------------|----------|----------|
| Q9UNN5        | FAS-associated factor 1                                                         | FAF1                | 78610000 | INFINITE |
| Q96AB3        | Isochorismatase domain-containing protein 2, mitochondrial                      | ISOC2               | 78440000 | INFINITE |
| Q13610        | Periodic tryptophan protein 1 homolog                                           | PWP1                | 78376000 | INFINITE |
| Q13188        | Serine/threonine-protein kinase 3;Serine/threonine kinase 3                     | STK3                | 78173000 | INFINITE |
| Q7LG56        | Ribonucleoside-diphosphate reductase subunit M2                                 | RRM2B               | 77539000 | INFINITE |
| Q9ULH7        | MKL/myocardin-like protein 2                                                    | MKL2                | 77527000 | INFINITE |
| P07738        | Bisphosphoglycerate mutase                                                      | BPGM                | 77387000 | INFINITE |
| A6NCN2        | Putative keratin-87 protein                                                     | KRT87P              | 77219000 | INFINITE |
| Q4G148        | Glucoside xylosyltransferase 1                                                  | GXYLT1              | 76886000 | INFINITE |
| Q99836        | Myeloid differentiation primary response protein 88                             | MYD88               | 76779000 | INFINITE |
| P85037        | Forkhead box protein K1                                                         | FOXK1               | 76750000 | INFINITE |
| Q9H6V9        | UPF0554 protein C2orf43                                                         | C2orf43             | 76402000 | INFINITE |
| P35555        | Fibrillin-1                                                                     | FBN1                | 76333000 | INFINITE |
| O75027        | ATP-binding cassette sub-family B member 7, mitochondrial                       | ABCB7               | 76093000 | INFINITE |
| Q9Y2W6        | Tudor and KH domain-containing protein                                          | TDRKH               | 75673000 | INFINITE |
| O43567        | E3 ubiquitin-protein ligase RNF13                                               | RNF13               | 75537000 | INFINITE |
| Q9NRL3        | Striatin-4                                                                      | STRN4               | 75519000 | INFINITE |
| P27105        | Erythrocyte band 7 integral membrane protein                                    | STOM                | 75177000 | INFINITE |
| Q7Z4T9        | Protein MAATS1                                                                  | MAATS1              | 75135000 | INFINITE |
| Q9BTD8        | RNA-binding protein 42                                                          | RBM42               | 74980000 | INFINITE |
| P49768        | Presenilin-1;Presenilin-1 NTF subunit;Presenilin-1 (gamma-secretase 1)          | PSEN1               | 74683000 | INFINITE |
| Q9Y6G3        | 39S ribosomal protein L42, mitochondrial                                        | MRPL42              | 74212000 | INFINITE |
| P14649        | Myosin light chain 6B                                                           | MYL6B               | 73912000 | INFINITE |
| Q9NP81        | Serine--tRNA ligase, mitochondrial                                              | SARS2               | 73912000 | INFINITE |
| Q9UJC3        | Protein Hook homolog 1                                                          | HOOK1               | 73872000 | INFINITE |
| Q96AX1        | Vacuolar protein sorting-associated protein 33A                                 | VPS33A              | 73778000 | INFINITE |
| Q9H1D9        | DNA-directed RNA polymerase III subunit RPC6                                    | POLR3F              | 73639000 | INFINITE |
| P48651        | Phosphatidylserine synthase 1                                                   | PTDSS1              | 73464000 | INFINITE |
| Q12974;Q99747 | Protein tyrosine phosphatase type IVA 2;Protein tyrosine phosphatase type IVA 2 | PTP4A2;PTP4A1       | 73256000 | INFINITE |
| Q99747        | Gamma-soluble NSF attachment protein                                            | NAPG                | 73197000 | INFINITE |
| Q9NZN3        | EH domain-containing protein 3                                                  | EHD3                | 72911000 | INFINITE |
| Q6NW29        | RWD domain-containing protein 4                                                 | RWDD4               | 72880000 | INFINITE |
| P51617        | Interleukin-1 receptor-associated kinase 1                                      | IRAK1               | 72695000 | INFINITE |
| P36639        | 7,8-dihydro-8-oxoguanine triphosphatase                                         | NUDT1               | 72437000 | INFINITE |
| Q9UBL3        | Set1/Ash2 histone methyltransferase complex subunit 2                           | ASH2L               | 72429000 | INFINITE |
| O95166;Q99747 | Gamma-aminobutyric acid receptor-associated protein 4                           | GABARAP;GABARAPL1   | 72330000 | INFINITE |
| Q9BUR4        | Telomerase Cajal body protein 1                                                 | WRAP53              | 72077000 | INFINITE |
| B9A064;P04114 | Immunoglobulin lambda-like polypeptide 5;Ig lambda 5                            | IGLL5;IGLC1         | 71964000 | INFINITE |
| Q8WXD5        | Gem-associated protein 6                                                        | GEMIN6              | 71900000 | INFINITE |
| P18887        | DNA repair protein XRCC1                                                        | XRCC1               | 71772000 | INFINITE |
| Q9BWQ6        | Protein YIPF2                                                                   | YIPF2               | 71606000 | INFINITE |
| P58107        | Epiplakin                                                                       | EPPK1               | 71557000 | INFINITE |
| Q16718        | NADH dehydrogenase [ubiquinone] 1 alpha subunit                                 | NDUFA5              | 71298000 | INFINITE |
| Q04726;Q04726 | Transducin-like enhancer protein 3;Transducin-like enhancer protein 3           | TLE3;TLE2;TLE1;TLE3 | 71289000 | INFINITE |
| P04114        | Apolipoprotein B-100;Apolipoprotein B-48                                        | APOB                | 71280000 | INFINITE |
| Q5SWX8        | Protein odr-4 homolog                                                           | ODR4                | 71048000 | INFINITE |
| P56377        | AP-1 complex subunit sigma-2                                                    | AP1S2               | 71026000 | INFINITE |
| Q9Y2H6        | Fibronectin type-III domain-containing protein 3A                               | FNDC3A              | 70833000 | INFINITE |
| Q8N111        | Cell cycle exit and neuronal differentiation protein                            | CEND1               | 70660000 | INFINITE |
| P49840        | Glycogen synthase kinase-3 alpha                                                | GSK3A               | 70408000 | INFINITE |

|           |                                                       |                |          |          |
|-----------|-------------------------------------------------------|----------------|----------|----------|
| Q9NPJ3    | Acyl-coenzyme A thioesterase 13;Acyl-coenzyme A       | ACOT13         | 70371000 | INFINITE |
| Q9Y4B6    | Protein VPRBP                                         | VPRBP          | 70309000 | INFINITE |
| Q99996    | A-kinase anchor protein 9                             | AKAP9          | 69838000 | INFINITE |
| O15075    | Serine/threonine-protein kinase DCLK1                 | DCLK1          | 69822000 | INFINITE |
| O75419    | Cell division control protein 45 homolog              | CDC45          | 69603000 | INFINITE |
| P23511    | Nuclear transcription factor Y subunit alpha          | NFYA           | 69564000 | INFINITE |
| P49590    | Probable histidine--tRNA ligase, mitochondrial        | HARS2          | 69479000 | INFINITE |
| Q13488    | V-type proton ATPase 116 kDa subunit a isoform 3      | TCIRG1         | 69444000 | INFINITE |
| Q96I59    | Probable asparagine--tRNA ligase, mitochondrial       | NARS2          | 69422000 | INFINITE |
| P41743    | Protein kinase C iota type                            | PRKCI          | 69356000 | INFINITE |
| O43493    | Trans-Golgi network integral membrane protein 2       | TGOLN2         | 68967000 | INFINITE |
| Q01658    | Protein Dr1                                           | DR1            | 68760000 | INFINITE |
| Q8NI60    | Atypical kinase ADCK3, mitochondrial                  | ADCK3          | 68683000 | INFINITE |
| Q7Z7K0    | COX assembly mitochondrial protein homolog            | CMC1           | 68666000 | INFINITE |
| Q9H3Z4    | DnaJ homolog subfamily C member 5                     | DNAJC5         | 68482000 | INFINITE |
| P49815    | Tuberin                                               | TSC2           | 68334000 | INFINITE |
| Q96HY7    | Probable 2-oxoglutarate dehydrogenase E1 compo        | DHTKD1         | 68155000 | INFINITE |
| Q8NBJ4    | Golgi membrane protein 1                              | GOLM1          | 68001000 | INFINITE |
| Q13232    | Nucleoside diphosphate kinase 3                       | NME3           | 67936000 | INFINITE |
| P24821    | Tenascin                                              | TNC            | 67667000 | INFINITE |
| Q9BZD4    | Kinetochore protein Nuf2                              | NUF2           | 67452000 | INFINITE |
| Q6YHK3    | CD109 antigen                                         | CD109          | 67365000 | INFINITE |
| P04233    | HLA class II histocompatibility antigen gamma chai    | CD74           | 67339000 | INFINITE |
| Q9P2D3    | HEAT repeat-containing protein 5B                     | HEATR5B        | 67338000 | INFINITE |
| Q9Y2L5    | Trafficking protein particle complex subunit 8        | TRAPPC8        | 67194000 | INFINITE |
| O14874    | [3-methyl-2-oxobutanoate dehydrogenase [lipoam        | BCKDK          | 67094000 | INFINITE |
| Q8WVT3    | Trafficking protein particle complex subunit 12       | TRAPPC12       | 66667000 | INFINITE |
| Q8NBT2    | Kinetochore protein Spc24                             | SPC24          | 66548000 | INFINITE |
| Q5HYK3    | 2-methoxy-6-polyprenyl-1,4-benzoquinol methylas       | COQ5           | 66527000 | INFINITE |
| P11169;Q8 | Solute carrier family 2, facilitated glucose transpor | SLC2A3;SLC2A14 | 66437000 | INFINITE |
| Q86VR2    | Protein FAM134C                                       | FAM134C        | 66419000 | INFINITE |
| Q5RI15    | Cytochrome c oxidase protein 20 homolog               | COX20          | 66343000 | INFINITE |
| P30154    | Serine/threonine-protein phosphatase 2A 65 kDa r      | PPP2R1B        | 66107000 | INFINITE |
| Q8NB46    | Serine/threonine-protein phosphatase 6 regulator      | ANKRD52        | 66015000 | INFINITE |
| Q96MW1    | Coiled-coil domain-containing protein 43              | CCDC43         | 65993000 | INFINITE |
| Q9C0F1    | Centrosomal protein of 44 kDa                         | CEP44          | 65754000 | INFINITE |
| Q68CQ7    | Glycosyltransferase 8 domain-containing protein 1     | GLT8D1         | 65621000 | INFINITE |
| Q9Y3R5    | Protein dopey-2                                       | DOPEY2         | 65598000 | INFINITE |
| Q86TP1    | Protein prune homolog                                 | PRUNE          | 65360000 | INFINITE |
| P15291    | Beta-1,4-galactosyltransferase 1;Lactose synthase     | B4GALT1        | 65290000 | INFINITE |
| Q9P013    | Spliceosome-associated protein CWC15 homolog          | CWC15          | 65233000 | INFINITE |
| Q13546    | Receptor-interacting serine/threonine-protein kin     | RIPK1          | 65181000 | INFINITE |
| P29317    | Ephrin type-A receptor 2                              | EPHA2          | 65029000 | INFINITE |
| P52735    | Guanine nucleotide exchange factor VAV2               | VAV2           | 64982000 | INFINITE |
| Q92845    | Kinesin-associated protein 3                          | KIFAP3         | 64979000 | INFINITE |
| Q8IZ73    | RNA pseudouridylate synthase domain-containing        | RPUSD2         | 64827000 | INFINITE |
| Q15052    | Rho guanine nucleotide exchange factor 6              | ARHGEF6        | 64811000 | INFINITE |
| Q9UJ41    | Rab5 GDP/GTP exchange factor                          | RABGEF1        | 64695000 | INFINITE |
| Q6NUM9    | All-trans-retinol 13,14-reductase                     | RETSAT         | 64656000 | INFINITE |
| P51808    | Dynein light chain Tctex-type 3                       | DYNLT3         | 64319000 | INFINITE |



|        |                                                                           |           |          |          |
|--------|---------------------------------------------------------------------------|-----------|----------|----------|
| Q15067 | Peroxisomal acyl-coenzyme A oxidase 1                                     | ACOX1     | 64215000 | INFINITE |
| Q96SY0 | von Willebrand factor A domain-containing protein VWA9                    |           | 63783000 | INFINITE |
| P49069 | Calcium signal-modulating cyclophilin ligand                              | CAMLG     | 63477000 | INFINITE |
| Q9Y2Z9 | Ubiquinone biosynthesis monooxygenase COQ6, nr COQ6                       |           | 63278000 | INFINITE |
| Q9UNX4 | WD repeat-containing protein 3                                            | WDR3      | 63250000 | INFINITE |
| Q96GX9 | Methylthioribulose-1-phosphate dehydratase                                | APIP      | 63180000 | INFINITE |
| Q8TBQ9 | Protein kish-A                                                            | TMEM167A  | 63044000 | INFINITE |
| Q7Z6M1 | Rab9 effector protein with kelch motifs                                   | RABEPK    | 62886000 | INFINITE |
| Q9BV79 | Trans-2-enoyl-CoA reductase, mitochondrial                                | MECR      | 62878000 | INFINITE |
| Q9BPY3 | Protein FAM118B                                                           | FAM118B   | 62845000 | INFINITE |
| O75152 | Zinc finger CCCH domain-containing protein 11A                            | ZC3H11A   | 62657000 | INFINITE |
| O95379 | Tumor necrosis factor alpha-induced protein 8                             | TNFAIP8   | 62230000 | INFINITE |
| Q9H900 | Protein zwilch homolog                                                    | ZWILCH    | 61880000 | INFINITE |
| Q9C035 | Tripartite motif-containing protein 5                                     | TRIM5     | 61801000 | INFINITE |
| Q70CQ2 | Ubiquitin carboxyl-terminal hydrolase 34                                  | USP34     | 61413000 | INFINITE |
| Q53RT3 | Retroviral-like aspartic protease 1                                       | ASPRV1    | 61342000 | INFINITE |
| Q9Y282 | Endoplasmic reticulum-Golgi intermediate compartment ERGIC3               |           | 61210000 | INFINITE |
| Q86VI3 | Ras GTPase-activating-like protein IQGAP3                                 | IQGAP3    | 61163000 | INFINITE |
| Q5EBL4 | RILP-like protein 1                                                       | RILPL1    | 60913000 | INFINITE |
| Q9GZS1 | DNA-directed RNA polymerase I subunit RPA49                               | POLR1E    | 60779000 | INFINITE |
| Q96BM9 | ADP-ribosylation factor-like protein 8A                                   | ARL8A     | 60648000 | INFINITE |
| Q8WUA7 | TBC1 domain family member 22A                                             | TBC1D22A  | 60616000 | INFINITE |
| Q9UQ53 | Alpha-1,3-mannosyl-glycoprotein 4-beta-N-acetylglucosaminyltransferase 4B | MGAT4B    | 60601000 | INFINITE |
| P49754 | Vacuolar protein sorting-associated protein 41 homolog VPS41              |           | 60537000 | INFINITE |
| P35813 | Protein phosphatase 1A                                                    | PPM1A     | 60479000 | INFINITE |
| Q6PID6 | Tetratricopeptide repeat protein 33                                       | TTC33     | 60392000 | INFINITE |
| Q8N392 | Rho GTPase-activating protein 18                                          | ARHGAP18  | 60151000 | INFINITE |
| Q96TC7 | Regulator of microtubule dynamics protein 3                               | RMDN3     | 60147000 | INFINITE |
| Q8WWI5 | Choline transporter-like protein 1                                        | SLC44A1   | 60130000 | INFINITE |
| Q7L7V1 | Putative pre-mRNA-splicing factor ATP-dependent DHX32                     |           | 60122000 | INFINITE |
| Q9BY41 | Histone deacetylase 8                                                     | HDAC8     | 60102000 | INFINITE |
| Q9UGJ1 | Gamma-tubulin complex component 4                                         | TUBGCP4   | 60093000 | INFINITE |
| Q9H330 | Transmembrane protein 245                                                 | TMEM245   | 60093000 | INFINITE |
| Q14012 | Calcium/calmodulin-dependent protein kinase type 1                        | CAMK1     | 60062000 | INFINITE |
| P05114 | Non-histone chromosomal protein HMG-14                                    | HMGN1     | 60032000 | INFINITE |
| O15111 | Inhibitor of nuclear factor kappa-B kinase subunit 1 CHUK                 |           | 59892000 | INFINITE |
| Q9Y5Z4 | Heme-binding protein 2                                                    | HEBP2     | 59825000 | INFINITE |
| Q7L266 | Isoaspartyl peptidase/L-asparaginase;isoaspartyl peptidase                | ASRGL1    | 59478000 | INFINITE |
| Q5T160 | Probable arginine--tRNA ligase, mitochondrial                             | RARS2     | 59328000 | INFINITE |
| Q9NUW8 | Tyrosyl-DNA phosphodiesterase 1                                           | TDP1      | 59213000 | INFINITE |
| Q9Y587 | AP-4 complex subunit sigma-1                                              | AP4S1     | 59033000 | INFINITE |
| P57081 | tRNA (guanine-N(7)-)-methyltransferase non-catalytic                      | WDR4      | 59014000 | INFINITE |
| Q9NXE4 | Sphingomyelin phosphodiesterase 4                                         | SMPD4     | 58946000 | INFINITE |
| Q7Z7E8 | Ubiquitin-conjugating enzyme E2 Q1                                        | UBE2Q1    | 58872000 | INFINITE |
| Q9P2B4 | CTTNBP2 N-terminal-like protein                                           | CTTNBP2NL | 58474000 | INFINITE |
| Q9NRY4 | Rho GTPase-activating protein 35                                          | ARHGAP35  | 58469000 | INFINITE |
| Q8IWA4 | Mitofusin-1                                                               | MFN1      | 58395000 | INFINITE |
| Q9NZW5 | MAGUK p55 subfamily member 6                                              | MPP6      | 58301000 | INFINITE |
| O95677 | Eyes absent homolog 4                                                     | EYA4      | 58229000 | INFINITE |
| Q92667 | A-kinase anchor protein 1, mitochondrial                                  | AKAP1     | 58215000 | INFINITE |

|           |                                                        |                 |                 |          |
|-----------|--------------------------------------------------------|-----------------|-----------------|----------|
| O75391    | Sperm-associated antigen 7                             | SPAG7           | 58208000        | INFINITE |
| Q9Y4K3    | TNF receptor-associated factor 6                       | TRAF6           | 58195000        | INFINITE |
| Q8IVM0    | Coiled-coil domain-containing protein 50               | CCDC50          | 58085000        | INFINITE |
| O60341    | Lysine-specific histone demethylase 1A                 | KDM1A           | 58035000        | INFINITE |
| Q9UKZ1    | CCR4-NOT transcription complex subunit 11              | CNOT11          | 58026000        | INFINITE |
| Q92791    | Synaptonemal complex protein SC65                      | LEPREL4         | 57913000        | INFINITE |
| Q13823    | Nucleolar GTP-binding protein 2                        | GNL2            | 57876000        | INFINITE |
| Q15369    | Transcription elongation factor B polypeptide 1        | TCEB1           | 57777000        | INFINITE |
| Q6ZRS2    | Helicase SRCAP                                         | SRCAP           | 57692000        | INFINITE |
| Q96DE0    | U8 snoRNA-decapping enzyme                             | NUDT16          | 57519000        | INFINITE |
| Q9NZ52    | ADP-ribosylation factor-binding protein GGA3           | GGA3            | 57473000        | INFINITE |
| P01024    | Complement C3;Complement C3 beta chain;C3-be C3        |                 | 57438000        | INFINITE |
| Q86WR0    | Coiled-coil domain-containing protein 25               | CCDC25          | 56916000        | INFINITE |
| P06400    | Retinoblastoma-associated protein                      | RB1             | 56848000        | INFINITE |
| Q9NWXU1   | 3-oxoacyl-[acyl-carrier-protein] synthase, mitochondri | OXSM            | 56836000        | INFINITE |
| Q9NWS0    | PIH1 domain-containing protein 1                       | PIH1D1          | 56769000        | INFINITE |
| P58546    | Myotrophin                                             | MTPN            | 56507000        | INFINITE |
| P15104    | Glutamine synthetase                                   | GLUL            | 56467000        | INFINITE |
| O95684    | FGFR1 oncogene partner                                 | FGFR1OP         | 56345000        | INFINITE |
| O95149    | Snurportin-1                                           | SNUPN           | 56333000        | INFINITE |
| P47712    | Cytosolic phospholipase A2;Phospholipase A2;Lysc       | PLA2G4A         | 56287000        | INFINITE |
| O95807    | Transmembrane protein 50A                              | TMEM50A         | 56251000        | INFINITE |
| P42785    | Lysosomal Pro-X carboxypeptidase                       | PRCP            | 56133000        | INFINITE |
| Q96F85    | CB1 cannabinoid receptor-interacting protein 1         | CNRIP1          | 56015000        | INFINITE |
| O43677    | NADH dehydrogenase [ubiquinone] 1 subunit C1, r        | NDUFC1          | 55906000        | INFINITE |
| Q8TEY7    | Ubiquitin carboxyl-terminal hydrolase 33               | USP33           | 55870000        | INFINITE |
| Q6NZY4    | Zinc finger CCHC domain-containing protein 8           | ZCCHC8          | 55729000        | INFINITE |
| Q8WVC6    | Dephospho-CoA kinase domain-containing protein         | DCAKD           | 55641000        | INFINITE |
| Q9NTI5    | Sister chromatid cohesion protein PDS5 homolog E       | PDS5B           | 55370000        | INFINITE |
| Q12893    | Transmembrane protein 115                              | TMEM115         | 54630000        | INFINITE |
| O00592    | Podocalyxin                                            | PODXL           | 54522000        | INFINITE |
| O15013    | Rho guanine nucleotide exchange factor 10              | ARHGEF10        | 54459000        | INFINITE |
| Q8NFF5    | FAD synthase;Molybdenum cofactor biosynthesis f        | FLAD1           | 54128000        | INFINITE |
| Q9H1E5    | Thioredoxin-related transmembrane protein 4            | TMX4            | 54102000        | INFINITE |
| Q86W56    | Poly(ADP-ribose) glycohydrolase                        | PARG            | 53950000        | INFINITE |
| Q9H6L5    | Protein FAM134B                                        | FAM134B         | 53901000        | INFINITE |
| Q68CQ4    | Digestive organ expansion factor homolog               | DIEXF           | 53886000        | INFINITE |
| P41236;Q6 | Protein phosphatase inhibitor 2;Protein phosphata      | PPP1R2;PPP1R2P3 | 53745000        | INFINITE |
| Q8WXA9    | Splicing regulatory glutamine/lysine-rich protein 1    | SREK1           | 53700000        | INFINITE |
| Q5VT66    | Mitochondrial amidoxime-reducing component 1           |                 | Mar-01 53383000 | INFINITE |
| Q9Y5A7    | NEDD8 ultimate buster 1                                | NUB1            | 53374000        | INFINITE |
| Q9Y6A4    | Cilia- and flagella-associated protein 20              | CFAP20          | 53114000        | INFINITE |
| Q9BV23    | Monoacylglycerol lipase ABHD6                          | ABHD6           | 53070000        | INFINITE |
| P34810    | Macrosialin                                            | CD68            | 52995000        | INFINITE |
| Q9C037    | E3 ubiquitin-protein ligase TRIM4                      | TRIM4           | 52847000        | INFINITE |
| Q9NVZ3    | Adaptin ear-binding coat-associated protein 2          | NECAP2          | 52827000        | INFINITE |
| Q86VX2    | COMM domain-containing protein 7                       | COMMD7          | 52766000        | INFINITE |
| Q8IV38    | Ankyrin repeat and MYND domain-containing prot         | ANKMY2          | 52674000        | INFINITE |
| O14972    | Down syndrome critical region protein 3                | DSCR3           | 52596000        | INFINITE |
| P16083    | Ribosylidihydronicotinamide dehydrogenase [quinc       | NQO2            | 52532000        | INFINITE |

|        |                                                                       |          |          |          |
|--------|-----------------------------------------------------------------------|----------|----------|----------|
| O75935 | Dynactin subunit 3                                                    | DCTN3    | 52512000 | INFINITE |
| Q9Y343 | Sorting nexin-24                                                      | SNX24    | 52480000 | INFINITE |
| Q06546 | GA-binding protein alpha chain                                        | GABPA    | 52462000 | INFINITE |
| O14646 | Chromodomain-helicase-DNA-binding protein 1                           | CHD1     | 52325000 | INFINITE |
| Q9UPN6 | Protein SCAF8                                                         | SCAF8    | 52309000 | INFINITE |
| P16333 | Cytoplasmic protein NCK1                                              | NCK1     | 52300000 | INFINITE |
| Q8IV04 | Carabin                                                               | TBC1D10C | 52174000 | INFINITE |
| Q9NWM8 | Peptidyl-prolyl cis-trans isomerase FKBP14                            | FKBP14   | 52046000 | INFINITE |
| P53667 | LIM domain kinase 1                                                   | LIMK1    | 52027000 | INFINITE |
| O43150 | Arf-GAP with SH3 domain, ANK repeat and PH domain                     | ASAP2    | 52025000 | INFINITE |
| Q9BR61 | Acyl-CoA-binding domain-containing protein 6                          | ACBD6    | 51782000 | INFINITE |
| Q9UNQ2 | Probable dimethyladenosine transferase                                | DIMT1    | 51764000 | INFINITE |
| Q6DKJ4 | Nucleoredoxin                                                         | NXN      | 51620000 | INFINITE |
| P78310 | Coxsackievirus and adenovirus receptor                                | CXADR    | 51597000 | INFINITE |
| P48506 | Glutamate--cysteine ligase catalytic subunit                          | GCLC     | 51580000 | INFINITE |
| Q9H7L9 | Sin3 histone deacetylase corepressor complex component                | SUDS3    | 51478000 | INFINITE |
| Q12894 | Interferon-related developmental regulator 2                          | IFRD2    | 51370000 | INFINITE |
| Q9P2B2 | Prostaglandin F2 receptor negative regulator                          | PTGFRN   | 51292000 | INFINITE |
| P30038 | Delta-1-pyrroline-5-carboxylate dehydrogenase, mitochondrial          | ALDH4A1  | 51166000 | INFINITE |
| P09038 | Fibroblast growth factor 2                                            | FGF2     | 50649000 | INFINITE |
| Q99956 | Dual specificity protein phosphatase 9                                | DUSP9    | 50575000 | INFINITE |
| O95674 | Phosphatidate cytidyltransferase 2                                    | CDS2     | 50566000 | INFINITE |
| Q16625 | Occludin                                                              | OCLN     | 50380000 | INFINITE |
| Q9NXX6 | Non-structural maintenance of chromosomes element                     | NSMCE4A  | 50267000 | INFINITE |
| P62253 | Ubiquitin-conjugating enzyme E2 G1;Ubiquitin-conjugating enzyme E2 G1 | UBE2G1   | 50043000 | INFINITE |
| Q9NVM4 | Protein arginine N-methyltransferase 7                                | PRMT7    | 50018000 | INFINITE |
| Q8WZA0 | Protein LZIC                                                          | LZIC     | 50001000 | INFINITE |
| P55058 | Phospholipid transfer protein                                         | PLTP     | 49940000 | INFINITE |
| O43924 | Retinal rod rhodopsin-sensitive cGMP 3,5-cyclic phosphodiesterase     | PDE6D    | 49927000 | INFINITE |
| O95229 | ZW10 interactor                                                       | ZWINT    | 49718000 | INFINITE |
| Q5VWJ9 | Sorting nexin-30                                                      | SNX30    | 49344000 | INFINITE |
| O43772 | Mitochondrial carnitine/acylcarnitine carrier protein                 | SLC25A20 | 49297000 | INFINITE |
| Q5UCC4 | ER membrane protein complex subunit 10                                | EMC10    | 49168000 | INFINITE |
| Q13625 | Apoptosis-stimulating of p53 protein 2                                | TP53BP2  | 49151000 | INFINITE |
| Q9BRF8 | Serine/threonine-protein phosphatase CPPED1                           | CPPED1   | 49058000 | INFINITE |
| Q9BQP7 | Mitochondrial genome maintenance exonuclease 1                        | MGME1    | 49020000 | INFINITE |
| Q9Y4A5 | Transformation/transcription domain-associated protein                | TRRAP    | 48941000 | INFINITE |
| P61626 | Lysozyme C                                                            | LYZ      | 48843000 | INFINITE |
| Q9ULQ0 | Striatin-interacting protein 2                                        | STRIP2   | 48829000 | INFINITE |
| Q92858 | Protein atonal homolog 1                                              | ATOH1    | 48821000 | INFINITE |
| Q9H3G5 | Probable serine carboxypeptidase CPVL                                 | CPVL     | 48695000 | INFINITE |
| P62487 | DNA-directed RNA polymerase II subunit RPB7                           | POLR2G   | 48618000 | INFINITE |
| Q9BY67 | Cell adhesion molecule 1                                              | CADM1    | 48549000 | INFINITE |
| Q9BZL1 | Ubiquitin-like protein 5                                              | UBL5     | 48503000 | INFINITE |
| P03905 | NADH-ubiquinone oxidoreductase chain 4                                | MT-ND4   | 48421000 | INFINITE |
| P29084 | Transcription initiation factor IIE subunit beta                      | GTF2E2   | 48173000 | INFINITE |
| Q9HD34 | LYR motif-containing protein 4                                        | LYRM4    | 48074000 | INFINITE |
| Q8N129 | Protein canopy homolog 4                                              | CNPY4    | 47837000 | INFINITE |
| Q7L775 | EPM2A-interacting protein 1                                           | EPM2AIP1 | 47694000 | INFINITE |
| Q8IUI8 | Cytokine receptor-like factor 3                                       | CRLF3    | 47650000 | INFINITE |

|           |                                                           |               |          |          |
|-----------|-----------------------------------------------------------|---------------|----------|----------|
| P15848    | Arylsulfatase B                                           | ARSB          | 47494000 | INFINITE |
| Q8WUA4    | General transcription factor 3C polypeptide 2             | GTF3C2        | 47369000 | INFINITE |
| O15254    | Peroxisomal acyl-coenzyme A oxidase 3                     | ACOX3         | 47351000 | INFINITE |
| Q96HN2    | Putative adenosylhomocysteinase 3                         | AHCYL2        | 47281000 | INFINITE |
| Q969X1    | Protein lifeguard 3                                       | TMBIM1        | 47230000 | INFINITE |
| Q9UK76    | Hematological and neurological expressed 1 protein        | HN1           | 47214000 | INFINITE |
| P48060    | Glioma pathogenesis-related protein 1                     | GLIPR1        | 46926000 | INFINITE |
| Q7L099    | Protein RUFY3                                             | RUFY3         | 46779000 | INFINITE |
| P69849;Q5 | Nodal modulator 3;Nodal modulator 2                       | NOMO3;NOMO2   | 46756000 | INFINITE |
| Q9H0R4    | Haloacid dehalogenase-like hydrolase domain-containing    | HDHD2         | 46649000 | INFINITE |
| Q66K14    | TBC1 domain family member 9B                              | TBC1D9B       | 46638000 | INFINITE |
| O95905    | Protein SGT1                                              | ECD           | 46634000 | INFINITE |
| Q86UV5    | Ubiquitin carboxyl-terminal hydrolase 48                  | USP48         | 46627000 | INFINITE |
| Q16775    | Hydroxyacylglutathione hydrolase, mitochondrial           | HAGH          | 46565000 | INFINITE |
| Q8WVK7    | Spindle and kinetochore-associated protein 2              | SKA2          | 46394000 | INFINITE |
| Q96IY1    | Kinetochore-associated protein NSL1 homolog               | NSL1          | 46313000 | INFINITE |
| Q8N3R9    | MAGUK p55 subfamily member 5                              | MPP5          | 46139000 | INFINITE |
| Q8IXQ4    | GPALPP motifs-containing protein 1                        | GPALPP1       | 46135000 | INFINITE |
| Q5TEJ8    | Protein THEMIS2                                           | THEMIS2       | 46093000 | INFINITE |
| O60216;Q9 | Double-strand-break repair protein rad21 homolog          | RAD21;RAD21L1 | 46068000 | INFINITE |
| P45984;P5 | Mitogen-activated protein kinase 9;Mitogen-activated      | MAPK9;MAPK10  | 45985000 | INFINITE |
| Q9Y5L4    | Mitochondrial import inner membrane translocase           | TIMM13        | 45972000 | INFINITE |
| Q6GQQ9    | OTU domain-containing protein 7B                          | OTUD7B        | 45862000 | INFINITE |
| Q92574    | Hamartin                                                  | TSC1          | 45771000 | INFINITE |
| Q96KX1    | Uncharacterized protein C4orf36                           | C4orf36       | 45591000 | INFINITE |
| Q55W96    | Low density lipoprotein receptor adapter protein 1        | LDLRAP1       | 45307000 | INFINITE |
| Q92889    | DNA repair endonuclease XPF                               | ERCC4         | 45247000 | INFINITE |
| Q9BRT9    | DNA replication complex GINS protein SLD5;DNA replication | GINS4         | 45223000 | INFINITE |
| Q86W42    | THO complex subunit 6 homolog                             | THOC6         | 45213000 | INFINITE |
| Q7Z3T8    | Zinc finger FYVE domain-containing protein 16             | ZFYVE16       | 45169000 | INFINITE |
| P62070    | Ras-related protein R-Ras2                                | RRAS2         | 45122000 | INFINITE |
| Q14790    | Caspase-8;Caspase-8 subunit p18;Caspase-8 subunit         | CASP8         | 45114000 | INFINITE |
| Q9H3P2    | Negative elongation factor A                              | NELFA         | 45088000 | INFINITE |
| Q6IQ22    | Ras-related protein Rab-12                                | RAB12         | 44629000 | INFINITE |
| Q9UJ14    | Gamma-glutamyltransferase 7;Gamma-glutamyltransferase     | GGT7          | 44513000 | INFINITE |
| Q14657    | EKC/KEOPS complex subunit LAGE3                           | LAGE3         | 44325000 | INFINITE |
| Q9NP61    | ADP-ribosylation factor GTPase-activating protein 3       | ARFGAP3       | 44324000 | INFINITE |
| Q96BX8    | MOB kinase activator 3A                                   | MOB3A         | 44294000 | INFINITE |
| Q6NSJ5    | Volume-regulated anion channel subunit LRRC8E             | LRRC8E        | 44286000 | INFINITE |
| O60927    | Protein phosphatase 1 regulatory subunit 11               | PPP1R11       | 44264000 | INFINITE |
| Q9BQE5    | Apolipoprotein L2                                         | APOL2         | 44205000 | INFINITE |
| P52756    | RNA-binding protein 5                                     | RBM5          | 44161000 | INFINITE |
| P86791;P8 | Vacuolar fusion protein CCZ1 homolog;Vacuolar fusion      | CCZ1;CCZ1B    | 44063000 | INFINITE |
| Q03426    | Mevalonate kinase                                         | MVK           | 44046000 | INFINITE |
| Q9NYT0    | Pleckstrin-2                                              | PLEK2         | 43978000 | INFINITE |
| Q9BRQ6    | MICOS complex subunit MIC25                               | CHCHD6        | 43969000 | INFINITE |
| P13051    | Uracil-DNA glycosylase                                    | UNG           | 43913000 | INFINITE |
| Q96EA4    | Protein Spindly                                           | SPDL1         | 43887000 | INFINITE |
| P03915    | NADH-ubiquinone oxidoreductase chain 5                    | MT-ND5        | 43796000 | INFINITE |
| Q9Y624    | Junctional adhesion molecule A                            | F11R          | 43574000 | INFINITE |

|           |                                                                                               |               |          |          |
|-----------|-----------------------------------------------------------------------------------------------|---------------|----------|----------|
| P62380    | TATA box-binding protein-like protein 1                                                       | TBPL1         | 43568000 | INFINITE |
| Q6ZVM7    | TOM1-like protein 2                                                                           | TOM1L2        | 43451000 | INFINITE |
| Q96LD4    | Tripartite motif-containing protein 47                                                        | TRIM47        | 43262000 | INFINITE |
| Q92733    | Proline-rich protein PRCC                                                                     | PRCC          | 43243000 | INFINITE |
| O60427    | Fatty acid desaturase 1                                                                       | FADS1         | 42920000 | INFINITE |
| P23378    | Glycine dehydrogenase (decarboxylating), mitochondria                                         | GLDC          | 42658000 | INFINITE |
| Q13309    | S-phase kinase-associated protein 2                                                           | SKP2          | 42407000 | INFINITE |
| O75832    | 26S proteasome non-ATPase regulatory subunit 1C                                               | PSMD10        | 42355000 | INFINITE |
| P11117    | Lysosomal acid phosphatase                                                                    | ACP2          | 42259000 | INFINITE |
| Q8IYS2    | Uncharacterized protein KIAA2013                                                              | KIAA2013      | 42247000 | INFINITE |
| Q9NUL7    | Probable ATP-dependent RNA helicase DDX28                                                     | DDX28         | 42235000 | INFINITE |
| Q6Y1H2    | Very-long-chain (3R)-3-hydroxyacyl-CoA dehydratase                                            | HACD2         | 42182000 | INFINITE |
| P53365    | Arfaptin-2                                                                                    | ARFIP2        | 42159000 | INFINITE |
| Q9UDR5    | Alpha-aminoadipic semialdehyde synthase, mitochondria                                         | AASS          | 42129000 | INFINITE |
| P28065    | Proteasome subunit beta type-9                                                                | PSMB9         | 42074000 | INFINITE |
| Q9UJ68    | Mitochondrial peptide methionine sulfoxide reductase                                          | MSRA          | 42039000 | INFINITE |
| P32970    | CD70 antigen                                                                                  | CD70          | 41845000 | INFINITE |
| O60879    | Protein diaphanous homolog 2                                                                  | DIAPH2        | 41712000 | INFINITE |
| Q9BUH6    | Protein PAXX                                                                                  | C9orf142      | 41543000 | INFINITE |
| Q96EH3    | Mitochondrial assembly of ribosomal large subunit                                             | MALSU1        | 41537000 | INFINITE |
| Q8IWZ8    | SURP and G-patch domain-containing protein 1                                                  | SUGP1         | 41455000 | INFINITE |
| P54619    | 5-AMP-activated protein kinase subunit gamma-1                                                | PRKAG1        | 41406000 | INFINITE |
| Q9BV81    | ER membrane protein complex subunit 6                                                         | EMC6          | 41302000 | INFINITE |
| Q9NWT6    | Hypoxia-inducible factor 1-alpha inhibitor                                                    | HIF1AN        | 41205000 | INFINITE |
| O95749    | Geranylgeranyl pyrophosphate synthase                                                         | GGPS1         | 41174000 | INFINITE |
| O15031    | Plexin-B2                                                                                     | PLXNB2        | 41041000 | INFINITE |
| Q9POS3;Q5 | ORM1-like protein 1;ORM1-like protein 2                                                       | ORMDL1;ORMDL2 | 40834000 | INFINITE |
| Q2VPK5    | Cytoplasmic tRNA 2-thiolation protein 2                                                       | CTU2          | 40787000 | INFINITE |
| P20338    | Ras-related protein Rab-4A                                                                    | RAB4A         | 40706000 | INFINITE |
| Q8WXF7    | Atlantin-1                                                                                    | ATL1          | 40551000 | INFINITE |
| Q03518    | Antigen peptide transporter 1                                                                 | TAP1          | 40446000 | INFINITE |
| Q9H4L7    | SWI/SNF-related matrix-associated actin-dependent regulator of chromatin subfamily 1 member C | SMARCAD1      | 40438000 | INFINITE |
| Q8NFC6    | Biorientation of chromosomes in cell division protein 1                                       | BOD1L1        | 40162000 | INFINITE |
| Q96FV2    | Secernin-2                                                                                    | SCRN2         | 40115000 | INFINITE |
| Q8WZA9    | Immunity-related GTPase family Q protein                                                      | IRGQ          | 39997000 | INFINITE |
| O43516    | WAS/WASL-interacting protein family member 1                                                  | WIPF1         | 39942000 | INFINITE |
| Q96FV9    | THO complex subunit 1                                                                         | THOC1         | 39859000 | INFINITE |
| A6NDU8    | UPF0600 protein C5orf51                                                                       | C5orf51       | 39834000 | INFINITE |
| Q96BR5    | Cytochrome c oxidase assembly factor 7                                                        | COA7          | 39820000 | INFINITE |
| Q9UIW2;Q9 | Plexin-A1;Plexin-A4                                                                           | PLXNA1;PLXNA4 | 39693000 | INFINITE |
| Q9H9Q4    | Non-homologous end-joining factor 1                                                           | NHEJ1         | 39687000 | INFINITE |
| Q8NE86    | Calcium uniporter protein, mitochondrial                                                      | MCU           | 39685000 | INFINITE |
| P07305    | Histone H1.0;Histone H1.0, N-terminally processed                                             | H1FO          | 39505000 | INFINITE |
| Q9H410    | Kinetochore-associated protein DSN1 homolog                                                   | DSN1          | 39458000 | INFINITE |
| Q8ND04    | Protein SMG8                                                                                  | SMG8          | 39405000 | INFINITE |
| Q9H2D1    | Mitochondrial folate transporter/carrier                                                      | SLC25A32      | 39400000 | INFINITE |
| Q8NDI1    | EH domain-binding protein 1                                                                   | EHBP1         | 39274000 | INFINITE |
| P05165    | Propionyl-CoA carboxylase alpha chain, mitochondria                                           | PCCA          | 39263000 | INFINITE |
| O60825;Q1 | 6-phosphofructo-2-kinase/fructose-2,6-bisphosphatase                                          | PFKFB2;PFKFB3 | 39228000 | INFINITE |
| Q8WVX9    | Fatty acyl-CoA reductase 1                                                                    | FAR1          | 39210000 | INFINITE |

|           |                                                                       |               |          |          |
|-----------|-----------------------------------------------------------------------|---------------|----------|----------|
| O95376    | E3 ubiquitin-protein ligase ARIH2                                     | ARIH2         | 39205000 | INFINITE |
| Q9P291    | Armadillo repeat-containing X-linked protein 1                        | ARMCX1        | 39077000 | INFINITE |
| Q12802    | A-kinase anchor protein 13                                            | AKAP13        | 38896000 | INFINITE |
| P78381    | UDP-galactose translocator                                            | SLC35A2       | 38800000 | INFINITE |
| P53384    | Cytosolic Fe-S cluster assembly factor NUBP1                          | NUBP1         | 38713000 | INFINITE |
| Q96IZ0    | PRKC apoptosis WT1 regulator protein                                  | PAWR          | 38698000 | INFINITE |
| Q13685    | Angio-associated migratory cell protein                               | AAMP          | 38466000 | INFINITE |
| Q6UXH1    | Cysteine-rich with EGF-like domain protein 2                          | CRELD2        | 38354000 | INFINITE |
| Q96CM8    | Acyl-CoA synthetase family member 2, mitochondrial                    | ACSF2         | 38272000 | INFINITE |
| Q6P1X5    | Transcription initiation factor TFIID subunit 2                       | TAF2          | 38163000 | INFINITE |
| Q8NC96    | Adaptin ear-binding coat-associated protein 1                         | NECAP1        | 38160000 | INFINITE |
| Q5TA45    | Integrator complex subunit 11                                         | CPSF3L        | 37931000 | INFINITE |
| O14966    | Ras-related protein Rab-7L1                                           | RAB29         | 37867000 | INFINITE |
| P43378    | Tyrosine-protein phosphatase non-receptor type 9                      | PTPN9         | 37561000 | INFINITE |
| Q9NPI6    | mRNA-decapping enzyme 1A                                              | DCP1A         | 37512000 | INFINITE |
| Q8NEB9    | Phosphatidylinositol 3-kinase catalytic subunit type 1                | PIK3C3        | 37408000 | INFINITE |
| Q9H0W9    | Ester hydrolase C11orf54                                              | C11orf54      | 37386000 | INFINITE |
| Q9P0J7    | E3 ubiquitin-protein ligase KCMF1                                     | KCMF1         | 37312000 | INFINITE |
| O94888    | UBX domain-containing protein 7                                       | UBXN7         | 37312000 | INFINITE |
| Q96LR5;Q9 | Ubiquitin-conjugating enzyme E2 E2;Ubiquitin-conjugating enzyme E2 E3 | UBE2E2;UBE2E3 | 37206000 | INFINITE |
| P30049    | ATP synthase subunit delta, mitochondrial                             | ATP5D         | 37186000 | INFINITE |
| Q86YV9    | Hermansky-Pudlak syndrome 6 protein                                   | HPS6          | 37139000 | INFINITE |
| Q01484    | Ankyrin-2                                                             | ANK2          | 37130000 | INFINITE |
| Q9UI14    | Prenylated Rab acceptor protein 1                                     | RABAC1        | 36894000 | INFINITE |
| Q5VT25    | Serine/threonine-protein kinase MRCK alpha                            | CDC42BPA      | 36846000 | INFINITE |
| Q9Y296    | Trafficking protein particle complex subunit 4                        | TRAPPC4       | 36834000 | INFINITE |
| Q02153    | Guanylate cyclase soluble subunit beta-1                              | GUCY1B3       | 36776000 | INFINITE |
| O15164    | Transcription intermediary factor 1-alpha                             | TRIM24        | 36655000 | INFINITE |
| Q9GZU8    | Protein FAM192A                                                       | FAM192A       | 36473000 | INFINITE |
| P42574    | Caspase-3;Caspase-3 subunit p17;Caspase-3 subunit p12                 | CASP3         | 36372000 | INFINITE |
| O15321    | Transmembrane 9 superfamily member 1                                  | TM9SF1        | 36347000 | INFINITE |
| Q9HA65    | TBC1 domain family member 17                                          | TBC1D17       | 36257000 | INFINITE |
| Q9H4G4    | Golgi-associated plant pathogenesis-related protein 2                 | GLIPR2        | 36251000 | INFINITE |
| Q96P63    | Serpin B12                                                            | SERPINB12     | 36220000 | INFINITE |
| O95825    | Quinone oxidoreductase-like protein 1                                 | CRYZL1        | 36105000 | INFINITE |
| Q6UVJ0    | Spindle assembly abnormal protein 6 homolog                           | SASS6         | 36102000 | INFINITE |
| Q9BT22    | Chitobiosyldiphosphodolichol beta-mannosyltransferase 1               | ALG1          | 36054000 | INFINITE |
| Q96GG9    | DCN1-like protein 1                                                   | DCUN1D1       | 36040000 | INFINITE |
| Q96BP2    | Coiled-coil-helix-coiled-coil-helix domain-containing protein 1       | CHCHD1        | 36036000 | INFINITE |
| Q9H6X2;P5 | Anthrax toxin receptor 1;Anthrax toxin receptor 2                     | ANTXR1;ANTXR2 | 35986000 | INFINITE |
| P52943    | Cysteine-rich protein 2                                               | CRIP2         | 35936000 | INFINITE |
| P29372    | DNA-3-methyladenine glycosylase                                       | MPG           | 35780000 | INFINITE |
| Q13153    | Serine/threonine-protein kinase PAK 1                                 | PAK1          | 35732000 | INFINITE |
| O14531    | Dihydropyrimidinase-related protein 4                                 | DPYSL4        | 35636000 | INFINITE |
| Q96MX6    | WD repeat-containing protein 92                                       | WDR92         | 35618000 | INFINITE |
| Q8WWH5    | Probable tRNA pseudouridine synthase 1                                | TRUB1         | 35513000 | INFINITE |
| Q9NVP2    | Histone chaperone ASF1B                                               | ASF1B         | 35410000 | INFINITE |
| Q02539    | Histone H1.1                                                          | HIST1H1A      | 35321000 | INFINITE |
| P50452    | Serpin B8                                                             | SERPINB8      | 35300000 | INFINITE |
| Q9H6E4    | Coiled-coil domain-containing protein 134                             | CCDC134       | 35209000 | INFINITE |

|           |                                                     |                  |          |          |
|-----------|-----------------------------------------------------|------------------|----------|----------|
| Q5ZPR3    | CD276 antigen                                       | CD276            | 35190000 | INFINITE |
| Q6NUQ1    | RAD50-interacting protein 1                         | RINT1            | 35156000 | INFINITE |
| P22681    | E3 ubiquitin-protein ligase CBL                     | CBL              | 35086000 | INFINITE |
| Q9NVS2    | 28S ribosomal protein S18a, mitochondrial           | MRPS18A          | 35077000 | INFINITE |
| P07992    | DNA excision repair protein ERCC-1                  | ERCC1            | 34942000 | INFINITE |
| P10398    | Serine/threonine-protein kinase A-Raf               | ARAF             | 34917000 | INFINITE |
| Q9NWS8    | Required for meiotic nuclear division protein 1 hor | RMND1            | 34908000 | INFINITE |
| Q15118    | [Pyruvate dehydrogenase (acetyl-transferring)] kin  | PDK1             | 34824000 | INFINITE |
| Q969S0    | UDP-xylose and UDP-N-acetylglucosamine transpo      | SLC35B4          | 34793000 | INFINITE |
| Q09472    | Histone acetyltransferase p300                      | EP300            | 34741000 | INFINITE |
| Q8NEC7    | Glutathione S-transferase C-terminal domain-cont    | GSTCD            | 34723000 | INFINITE |
| Q15418    | Ribosomal protein S6 kinase alpha-1                 | RPS6KA1          | 34720000 | INFINITE |
| Q96SK2    | Transmembrane protein 209                           | TMEM209          | 34712000 | INFINITE |
| P34059    | N-acetylgalactosamine-6-sulfatase                   | GALNS            | 34704000 | INFINITE |
| P17568    | NADH dehydrogenase [ubiquinone] 1 beta subcorr      | NDUFB7           | 34698000 | INFINITE |
| A2NJV5;A0 | Ig kappa chain V-II region RPMI 6410;Ig kappa chai  | IGKV A18;IGKV2D- | 34477000 | INFINITE |
| Q969E8    | Pre-rRNA-processing protein TSR2 homolog            | TSR2             | 34446000 | INFINITE |
| Q6IBW4    | Condensin-2 complex subunit H2                      | NCAPH2           | 34425000 | INFINITE |
| Q9HAD4    | WD repeat-containing protein 41                     | WDR41            | 34310000 | INFINITE |
| P23443    | Ribosomal protein S6 kinase beta-1                  | RPS6KB1          | 34270000 | INFINITE |
| Q9Y639    | Neuroplastin                                        | NPTN             | 34256000 | INFINITE |
| O00422    | Histone deacetylase complex subunit SAP18           | SAP18            | 34252000 | INFINITE |
| P49917    | DNA ligase 4                                        | LIG4             | 34200000 | INFINITE |
| Q9BXB7    | Spermatogenesis-associated protein 16               | SPATA16          | 34180000 | INFINITE |
| O14734    | Acyl-coenzyme A thioesterase 8                      | ACOT8            | 34099000 | INFINITE |
| Q9Y618    | Nuclear receptor corepressor 2                      | NCOR2            | 34093000 | INFINITE |
| Q15048    | Leucine-rich repeat-containing protein 14           | LRRC14           | 34056000 | INFINITE |
| Q7Z4S6    | Kinesin-like protein KIF21A                         | KIF21A           | 33975000 | INFINITE |
| P39210    | Protein Mpv17                                       | MPV17            | 33863000 | INFINITE |
| Q96K21    | Abscission/NoCut checkpoint regulator               | ZFYVE19          | 33821000 | INFINITE |
| P18846;P1 | Cyclic AMP-dependent transcription factor ATF-1;(   | ATF1;CREB1       | 33776000 | INFINITE |
| Q03154    | Aminoacylase-1                                      | ACY1             | 33722000 | INFINITE |
| Q4ZIN3    | Membralin                                           | TMEM259          | 33569000 | INFINITE |
| Q9UP95    | Solute carrier family 12 member 4                   | SLC12A4          | 33545000 | INFINITE |
| P56559    | ADP-ribosylation factor-like protein 4C             | ARL4C            | 33503000 | INFINITE |
| Q9UL62;Q5 | Short transient receptor potential channel 5;Short  | TRPC5;TRPC4      | 33427000 | INFINITE |
| P53794    | Sodium/myo-inositol cotransporter                   | SLC5A3           | 33418000 | INFINITE |
| Q9Y6J9    | TAF6-like RNA polymerase II p300/CBP-associated     | TAF6L            | 33330000 | INFINITE |
| Q969S9    | Ribosome-releasing factor 2, mitochondrial          | GFM2             | 33258000 | INFINITE |
| Q9H583    | HEAT repeat-containing protein 1;HEAT repeat-cor    | HEATR1           | 33210000 | INFINITE |
| P63096    | Guanine nucleotide-binding protein G(i) subunit al  | GNAI1            | 33107000 | INFINITE |
| P61024    | Cyclin-dependent kinases regulatory subunit 1       | CKS1B            | 32887000 | INFINITE |
| Q9UPY8    | Microtubule-associated protein RP/EB family mem     | MAPRE3           | 32840000 | INFINITE |
| Q9H497    | Torsin-3A                                           | TOR3A            | 32782000 | INFINITE |
| Q8IZ21    | Phosphatase and actin regulator 4                   | PHACTR4          | 32759000 | INFINITE |
| Q8TCY9    | Up-regulator of cell proliferation                  | URGCP            | 32753000 | INFINITE |
| Q8IY95    | Transmembrane protein 192                           | TMEM192          | 32737000 | INFINITE |
| Q9NTG7    | NAD-dependent protein deacetylase sirtuin-3, mit    | SIRT3            | 32698000 | INFINITE |
| Q9UHR6    | Zinc finger HIT domain-containing protein 2         | ZNHIT2           | 32623000 | INFINITE |
| Q8NAV1    | Pre-mRNA-splicing factor 38A                        | PRPF38A          | 32590000 | INFINITE |

|               |                                                                    |             |          |          |
|---------------|--------------------------------------------------------------------|-------------|----------|----------|
| O94885        | SAM and SH3 domain-containing protein 1                            | SASH1       | 32582000 | INFINITE |
| Q8WV10        | Small integral membrane protein 4                                  | SMIM4       | 32575000 | INFINITE |
| Q9NU23        | LYR motif-containing protein 2                                     | LYRM2       | 32452000 | INFINITE |
| P29400        | Collagen alpha-5(IV) chain                                         | COL4A5      | 32451000 | INFINITE |
| Q8N3X1        | Formin-binding protein 4                                           | FNBP4       | 32428000 | INFINITE |
| Q9BSB4        | Autophagy-related protein 101                                      | ATG101      | 32350000 | INFINITE |
| Q9NQP4        | Prefoldin subunit 4                                                | PFDN4       | 32317000 | INFINITE |
| Q9UMS0        | NFU1 iron-sulfur cluster scaffold homolog, mitochondria            | NFU1        | 32240000 | INFINITE |
| P10636        | Microtubule-associated protein tau                                 | MAPT        | 32172000 | INFINITE |
| Q8NCE2        | Myotubularin-related protein 14                                    | MTMR14      | 32156000 | INFINITE |
| Q9NUB1        | Acetyl-coenzyme A synthetase 2-like, mitochondrial                 | ACSS1       | 32110000 | INFINITE |
| Q08AD1        | Calmodulin-regulated spectrin-associated protein 1                 | CAMSAP2     | 31852000 | INFINITE |
| P30047        | GTP cyclohydrolase 1 feedback regulatory protein                   | GCHFR       | 31828000 | INFINITE |
| Q8NEM2        | SHC SH2 domain-binding protein 1                                   | SHCBP1      | 31812000 | INFINITE |
| Q9BVL2        | Nucleoporin p58/p45                                                | NUPL1       | 31647000 | INFINITE |
| Q9NVA4        | Transmembrane protein 184C                                         | TMEM184C    | 31626000 | INFINITE |
| Q8TD30        | Alanine aminotransferase 2                                         | GPT2        | 31578000 | INFINITE |
| Q8N201        | Integrator complex subunit 1                                       | INTS1       | 31577000 | INFINITE |
| O43765        | Small glutamine-rich tetratricopeptide repeat-containing protein 1 | SGTA        | 31555000 | INFINITE |
| Q9NNW7        | Thioredoxin reductase 2, mitochondrial                             | TXNRD2      | 31535000 | INFINITE |
| P05109        | Protein S100-A8;Protein S100-A8, N-terminally processed            | S100A8      | 31400000 | INFINITE |
| Q9H2P0        | Activity-dependent neuroprotector homeobox protein 1               | ADNP        | 31395000 | INFINITE |
| Q96DZ1        | Endoplasmic reticulum lectin 1                                     | ERLEC1      | 31391000 | INFINITE |
| Q9H944        | Mediator of RNA polymerase II transcription subunit 20             | MED20       | 31364000 | INFINITE |
| P49914        | 5-formyltetrahydrofolate cyclo-ligase                              | MTHFS       | 31355000 | INFINITE |
| Q8WX93        | Palladin                                                           | PALLD       | 31286000 | INFINITE |
| Q86X10        | Ral GTPase-activating protein subunit beta                         | RALGAPB     | 31286000 | INFINITE |
| Q92604        | Acyl-CoA:lysophosphatidylglycerol acyltransferase                  | LPGAT1      | 31273000 | INFINITE |
| O75191        | Xylulose kinase                                                    | XYLB        | 31271000 | INFINITE |
| Q93050        | V-type proton ATPase 116 kDa subunit a isoform 1                   | ATP6VOA1    | 31236000 | INFINITE |
| Q9NXJ5        | Pyroglutamyl-peptidase 1                                           | PGPEP1      | 31136000 | INFINITE |
| Q6ZS17        | Protein FAM65A                                                     | FAM65A      | 31118000 | INFINITE |
| Q92536        | Y+L amino acid transporter 2                                       | SLC7A6      | 31068000 | INFINITE |
| Q8WVD3        | E3 ubiquitin-protein ligase RNF138                                 | RNF138      | 30892000 | INFINITE |
| Q5T9L3        | Protein wntless homolog                                            | WLS         | 30745000 | INFINITE |
| P42357        | Histidine ammonia-lyase                                            | HAL         | 30742000 | INFINITE |
| Q9Y6K0        | Choline/ethanolaminephosphotransferase 1                           | CEPT1       | 30635000 | INFINITE |
| P62837        | Ubiquitin-conjugating enzyme E2 D2                                 | UBE2D2      | 30633000 | INFINITE |
| Q96EL3        | 39S ribosomal protein L53, mitochondrial                           | MRPL53      | 30593000 | INFINITE |
| Q9UQR0        | Sex comb on midleg-like protein 2                                  | SCML2       | 30559000 | INFINITE |
| Q9NXA8        | NAD-dependent protein deacetylase sirtuin-5, mitochondrial         | SIRT5       | 30455000 | INFINITE |
| O15439        | Multidrug resistance-associated protein 4                          | ABCC4       | 30433000 | INFINITE |
| Q9Y303        | Putative N-acetylglucosamine-6-phosphate deacetylase               | AMDHD2      | 30298000 | INFINITE |
| Q13137        | Calcium-binding and coiled-coil domain-containing protein 2        | CALCOCO2    | 30283000 | INFINITE |
| Q96PC5;Q96CN9 | Melanoma inhibitory activity protein 2;cTAGE family member 1       | MIA2;CTAGE1 | 30282000 | INFINITE |
| Q96CN9        | GRIP and coiled-coil domain-containing protein 1                   | GCC1        | 30192000 | INFINITE |
| P31327        | Carbamoyl-phosphate synthase [ammonia], mitochondrial              | CPS1        | 30050000 | INFINITE |
| Q9UHB7        | AF4/FMR2 family member 4                                           | AFF4        | 29889000 | INFINITE |
| P52895        | Aldo-keto reductase family 1 member C2                             | AKR1C2      | 29867000 | INFINITE |
| Q16854        | Deoxyguanosine kinase, mitochondrial                               | DGUOK       | 29827000 | INFINITE |



|               |                                                                     |                     |          |          |
|---------------|---------------------------------------------------------------------|---------------------|----------|----------|
| Q12873        | Chromodomain-helicase-DNA-binding protein 3                         | CHD3                | 29809000 | INFINITE |
| Q8TAP6        | Centrosomal protein of 76 kDa                                       | CEP76               | 29737000 | INFINITE |
| Q5R3I4        | Tetratricopeptide repeat protein 38                                 | TTC38               | 29638000 | INFINITE |
| O43657        | Tetraspanin-6                                                       | TSPAN6              | 29590000 | INFINITE |
| Q8WUK0        | Phosphatidylglycerophosphatase and protein-tyrosine phosphatase 1   | PTPMT1              | 29538000 | INFINITE |
| Q6ZXV5        | Transmembrane and TPR repeat-containing protein 3                   | TMTC3               | 29446000 | INFINITE |
| Q86X83        | COMM domain-containing protein 2                                    | COMMD2              | 29369000 | INFINITE |
| O95786        | Probable ATP-dependent RNA helicase DDX58                           | DDX58               | 29365000 | INFINITE |
| P41223        | Protein BUD31 homolog                                               | BUD31               | 29354000 | INFINITE |
| Q6ZMZ3        | Nesprin-3                                                           | SYNE3               | 29347000 | INFINITE |
| Q6ZSZ5        | Rho guanine nucleotide exchange factor 18                           | ARHGEF18            | 29240000 | INFINITE |
| Q9H4I3        | TraB domain-containing protein                                      | TRABD               | 29063000 | INFINITE |
| Q15750        | TGF-beta-activated kinase 1 and MAP3K7-binding protein 1            | TAB1                | 29053000 | INFINITE |
| Q32P44        | Echinoderm microtubule-associated protein-like 3                    | EML3                | 29011000 | INFINITE |
| Q7Z6K3        | Protein prenyltransferase alpha subunit repeat-containing protein 1 | PTAR1               | 28885000 | INFINITE |
| O60563        | Cyclin-T1                                                           | CCNT1               | 28868000 | INFINITE |
| O60282        | Kinesin heavy chain isoform 5C                                      | KIF5C               | 28848000 | INFINITE |
| Q9NXC5        | WD repeat-containing protein 10                                     | MIOS                | 28767000 | INFINITE |
| Q9H0H0        | Integrator complex subunit 2                                        | INTS2               | 28707000 | INFINITE |
| Q6PL24        | Protein TMED8                                                       | TMED8               | 28510000 | INFINITE |
| Q5BJH7        | Protein YIF1B                                                       | YIF1B               | 28477000 | INFINITE |
| Q9H4Z3        | Phosphorylated CTD-interacting factor 1                             | PCIF1               | 28401000 | INFINITE |
| Q13107        | Ubiquitin carboxyl-terminal hydrolase 4                             | USP4                | 28392000 | INFINITE |
| P48740        | Mannan-binding lectin serine protease 1;Mannan-binding protein 2    | MASP1               | 28336000 | INFINITE |
| P08253        | 72 kDa type IV collagenase;PEX                                      | MMP2                | 28316000 | INFINITE |
| Q9UDX5        | Mitochondrial fission process protein 1                             | MTFP1               | 28250000 | INFINITE |
| Q14249        | Endonuclease G, mitochondrial                                       | ENDOG               | 28170000 | INFINITE |
| Q9NPF5        | DNA methyltransferase 1-associated protein 1                        | DMAP1               | 28150000 | INFINITE |
| O43808        | Peroxisomal membrane protein PMP34                                  | SLC25A17            | 28149000 | INFINITE |
| Q86XI2        | Condensin-2 complex subunit G2                                      | NCAPG2              | 28000000 | INFINITE |
| P00156        | Cytochrome b                                                        | MT-CYB              | 27813000 | INFINITE |
| A0A024RBC1    | Diphosphoinositol polyphosphate phosphohydrolase 4                  | NUDT4;NUDT11;NUDT12 | 27810000 | INFINITE |
| Q13795        | ADP-ribosylation factor-related protein 1                           | ARFRP1              | 27722000 | INFINITE |
| Q9Y680        | Peptidyl-prolyl cis-trans isomerase FKBP7                           | FKBP7               | 27608000 | INFINITE |
| Q9Y3S2        | Zinc finger protein 330                                             | ZNF330              | 27513000 | INFINITE |
| Q96C24        | Synaptotagmin-like protein 4                                        | SYTL4               | 27408000 | INFINITE |
| Q16623        | Syntaxin-1A                                                         | STX1A               | 27394000 | INFINITE |
| P10109        | Adrenodoxin, mitochondrial                                          | FDX1                | 27391000 | INFINITE |
| P63027        | Vesicle-associated membrane protein 2                               | VAMP2               | 27282000 | INFINITE |
| Q9BRS8        | La-related protein 6                                                | LARP6               | 27247000 | INFINITE |
| Q9UKU7        | Isobutyryl-CoA dehydrogenase, mitochondrial                         | ACAD8               | 27050000 | INFINITE |
| O60462        | Neuropilin-2                                                        | NRP2                | 27033000 | INFINITE |
| Q13287        | N-myc-interactor                                                    | NMI                 | 26981000 | INFINITE |
| P49674;P49675 | Casein kinase I isoform epsilon;Casein kinase I isoform delta       | CSNK1E;CSNK1D       | 26905000 | INFINITE |
| O43597        | Protein sprouty homolog 2                                           | SPRY2               | 26893000 | INFINITE |
| P17050        | Alpha-N-acetylgalactosaminidase                                     | NAGA                | 26885000 | INFINITE |
| O60504        | Vinexin                                                             | SORBS3              | 26875000 | INFINITE |
| Q8NBN7        | Retinol dehydrogenase 13                                            | RDH13               | 26752000 | INFINITE |
| Q5JUR7        | Testis-expressed sequence 30 protein                                | TEX30               | 26725000 | INFINITE |
| Q8NCL4        | Polypeptide N-acetylgalactosaminyltransferase 6                     | GALNT6              | 26675000 | INFINITE |

|           |                                                     |              |          |          |
|-----------|-----------------------------------------------------|--------------|----------|----------|
| Q86TN4    | tRNA 2-phosphotransferase 1                         | TRPT1        | 26645000 | INFINITE |
| Q16527    | Cysteine and glycine-rich protein 2                 | CSRP2        | 26637000 | INFINITE |
| Q53S08;Q9 | Ras-related protein Rab-6C                          | RAB6C        | 26535000 | INFINITE |
| Q06190    | Serine/threonine-protein phosphatase 2A regulatc    | PPP2R3A      | 26522000 | INFINITE |
| Q96GW9    | Methionine--tRNA ligase, mitochondrial              | MARS2        | 26457000 | INFINITE |
| Q8N490    | Probable hydrolase PNKD                             | PNKD         | 26447000 | INFINITE |
| Q9HB66    |                                                     | MKKS         | 26298000 | INFINITE |
| P61266    | Syntaxin-1B                                         | STX1B        | 26245000 | INFINITE |
| Q86YR5    | G-protein-signaling modulator 1                     | GPSM1        | 26162000 | INFINITE |
| Q9C0E2    | Exportin-4                                          | XPO4         | 26136000 | INFINITE |
| Q9BQ69    | O-acetyl-ADP-ribose deacetylase MACROD1             | MACROD1      | 26108000 | INFINITE |
| Q5TDH0    | Protein DDI1 homolog 2                              | DDI2         | 26001000 | INFINITE |
| Q5U5X0    | Complex III assembly factor LYRM7                   | LYRM7        | 25981000 | INFINITE |
| P42695    | Condensin-2 complex subunit D3                      | NCAPD3       | 25944000 | INFINITE |
| Q9UL03    | Integrator complex subunit 6                        | INTS6        | 25934000 | INFINITE |
| O14672    | Disintegrin and metalloproteinase domain-contain    | ADAM10       | 25865000 | INFINITE |
| P55789    | FAD-linked sulfhydryl oxidase ALR                   | GFER         | 25842000 | INFINITE |
| O95758    | Polypyrimidine tract-binding protein 3              | PTBP3        | 25759000 | INFINITE |
| Q5T0D9    | Tumor protein p63-regulated gene 1-like protein     | TPRG1L       | 25756000 | INFINITE |
| O00754    | Lysosomal alpha-mannosidase;Lysosomal alpha-m       | MAN2B1       | 25628000 | INFINITE |
| P08922    | Proto-oncogene tyrosine-protein kinase ROS          | ROS1         | 25567000 | INFINITE |
| P31323    | cAMP-dependent protein kinase type II-beta regul    | PRKAR2B      | 25567000 | INFINITE |
| Q9NSY1    | BMP-2-inducible protein kinase                      | BMP2K        | 25489000 | INFINITE |
| Q9NWB6    | Arginine and glutamate-rich protein 1               | ARGLU1       | 25454000 | INFINITE |
| O95834    | Echinoderm microtubule-associated protein-like 2    | EML2         | 25433000 | INFINITE |
| Q9H7B4    | Histone-lysine N-methyltransferase SMYD3            | SMYD3        | 25323000 | INFINITE |
| Q9BUE6    | Iron-sulfur cluster assembly 1 homolog, mitochonc   | ISCA1        | 25320000 | INFINITE |
| Q99504    | Eyes absent homolog 3                               | EYA3         | 25258000 | INFINITE |
| Q96QU8    | Exportin-6                                          | XPO6         | 25244000 | INFINITE |
| P49711;Q8 | Transcriptional repressor CTCF;Transcriptional repi | CTCF;CTCFL   | 25108000 | INFINITE |
| P53611    | Geranylgeranyl transferase type-2 subunit beta      | RABGGTB      | 25101000 | INFINITE |
| Q96AA3    | Protein RFT1 homolog                                | RFT1         | 25089000 | INFINITE |
| P43007    | Neutral amino acid transporter A                    | SLC1A4       | 25076000 | INFINITE |
| O95295    | SNARE-associated protein Snapin                     | SNAPIN       | 25024000 | INFINITE |
| Q96F63    | Coiled-coil domain-containing protein 97            | CCDC97       | 25004000 | INFINITE |
| Q8IX18    | Probable ATP-dependent RNA helicase DHX40           | DHX40        | 24940000 | INFINITE |
| Q9Y605    | MORF4 family-associated protein 1                   | MRFAP1       | 24831000 | INFINITE |
| Q96LB3    | Intraflagellar transport protein 74 homolog         | IFT74        | 24819000 | INFINITE |
| Q96T60    | Bifunctional polynucleotide phosphatase/kinase;Pc   | PNKP         | 24690000 | INFINITE |
| Q58FG1    | Putative heat shock protein HSP 90-alpha A4         | HSP90AA4P    | 24588000 | INFINITE |
| Q8IX11    | Mitochondrial Rho GTPase 2                          | RHOT2        | 24556000 | INFINITE |
| Q13286    | Battenin                                            | CLN3         | 24456000 | INFINITE |
| Q9NUD5    | Zinc finger CCHC domain-containing protein 3        | ZCCHC3       | 24411000 | INFINITE |
| O43426    | Synaptojanin-1                                      | SYNJ1        | 24352000 | INFINITE |
| Q99808    | Equilibrative nucleoside transporter 1              | SLC29A1      | 24349000 | INFINITE |
| O14757    | Serine/threonine-protein kinase Chk1                | CHEK1        | 24254000 | INFINITE |
| P01116    | GTPase KRas;GTPase KRas, N-terminally processed     | KRAS         | 24201000 | INFINITE |
| Q9ULU8;Q8 | Calcium-dependent secretion activator 1;Calcium-(   | CADPS;CADPS2 | 24137000 | INFINITE |
| Q13901    | Nuclear nucleic acid-binding protein C1D            | C1D          | 24134000 | INFINITE |
| Q05707    | Collagen alpha-1(XIV) chain                         | COL14A1      | 24036000 | INFINITE |

|           |                                                                     |                   |          |          |
|-----------|---------------------------------------------------------------------|-------------------|----------|----------|
| Q7L8L6    | FAST kinase domain-containing protein 5                             | FASTKD5           | 24032000 | INFINITE |
| Q8IXI2    | Mitochondrial Rho GTPase 1                                          | RHOT1             | 24029000 | INFINITE |
| P55061    | Bax inhibitor 1                                                     | TMBIM6            | 24009000 | INFINITE |
| Q9BZA8;Q5 | Protocadherin-11 Y-linked;Protocadherin-11 X-link                   | PCDH11Y;PCDH11X   | 23962000 | INFINITE |
| Q9H8Y5    | Ankyrin repeat and zinc finger domain-containing protein 1          | ANKZF1            | 23955000 | INFINITE |
| Q9BZG8    | Diphthamide biosynthesis protein 1                                  | DPH1              | 23951000 | INFINITE |
| Q8IVH8    | Mitogen-activated protein kinase kinase kinase kinase 3             | MAP4K3            | 23744000 | INFINITE |
| Q8IWJ2    | GRIP and coiled-coil domain-containing protein 2                    | GCC2              | 23700000 | INFINITE |
| P25098;P3 | Beta-adrenergic receptor kinase 1;Beta-adrenergic receptor kinase 2 | ADRBK1;ADRBK2     | 23476000 | INFINITE |
| Q15517    | Corneodesmosin                                                      | CDSN              | 23470000 | INFINITE |
| Q96KQ7    | Histone-lysine N-methyltransferase EHMT2                            | EHMT2             | 23374000 | INFINITE |
| Q92805    | Golgin subfamily A member 1                                         | GOLGA1            | 23354000 | INFINITE |
| Q96JH7    | Deubiquitinating protein VCIP135                                    | VCPIP1            | 23332000 | INFINITE |
| P53602    | Diphosphomevalonate decarboxylase                                   | MVD               | 23201000 | INFINITE |
| O60870    | DNA/RNA-binding protein KIN17                                       | KIN               | 23110000 | INFINITE |
| Q6IQ49    | Protein SDE2 homolog                                                | SDE2              | 23094000 | INFINITE |
| Q9NWZ5    | Uridine-cytidine kinase-like 1                                      | UCKL1             | 23048000 | INFINITE |
| Q9Y4U1    | Methylmalonic aciduria and homocystinuria type C                    | MMACHC            | 22987000 | INFINITE |
| Q8NFG4    | Folliculin                                                          | FLCN              | 22955000 | INFINITE |
| Q9HC21    | Mitochondrial thiamine pyrophosphate carrier                        | SLC25A19          | 22952000 | INFINITE |
| Q9H4L4    | Sentrin-specific protease 3                                         | SEN3              | 22923000 | INFINITE |
| Q9BQB6    | Vitamin K epoxide reductase complex subunit 1                       | VKORC1            | 22912000 | INFINITE |
| POC7V9;A6 | Putative methyltransferase-like protein 15P1;Proboscis              | METTL15P1;METTL15 | 22758000 | INFINITE |
| Q9BU61    | NADH dehydrogenase [ubiquinone] 1 alpha subunit                     | NDUFA3            | 22678000 | INFINITE |
| Q9Y2H0    | Disks large-associated protein 4                                    | DLGAP4            | 22633000 | INFINITE |
| Q8IXJ6    | NAD-dependent protein deacetylase sirtuin-2                         | SIRT2             | 22605000 | INFINITE |
| P18074    | TFIIH basal transcription factor complex helicase X                 | ERCC2             | 22583000 | INFINITE |
| Q9BYX2    | TBC1 domain family member 2A                                        | TBC1D2            | 22537000 | INFINITE |
| Q9BQG2    | Peroxisomal NADH pyrophosphatase                                    | NUDT12            | 22393000 | INFINITE |
| Q96EF6    | F-box only protein 17                                               | FBXO17            | 22392000 | INFINITE |
| Q9BVL4    | Selenoprotein O                                                     | SELO              | 22340000 | INFINITE |
| Q15527    | Surfeit locus protein 2                                             | SURF2             | 22329000 | INFINITE |
| Q9UGN5    | Poly [ADP-ribose] polymerase 2                                      | PARP2             | 22293000 | INFINITE |
| O14657    | Torsin-1B                                                           | TOR1B             | 22186000 | INFINITE |
| Q7Z6K5    | Arpin                                                               | ARPIN             | 22178000 | INFINITE |
| P55212    | Caspase-6;Caspase-6 subunit p18;Caspase-6 subunit                   | CASP6             | 22152000 | INFINITE |
| C9JLW8    | Protein FAM195B                                                     | FAM195B           | 22111000 | INFINITE |
| O15047    | Histone-lysine N-methyltransferase SETD1A                           | SETD1A            | 22052000 | INFINITE |
| Q96RT1    | Protein LAP2                                                        | ERBB2IP           | 21973000 | INFINITE |
| O95363    | Phenylalanine--tRNA ligase, mitochondrial                           | FARS2             | 21823000 | INFINITE |
| Q8IZA0    | Dyslexia-associated protein KIAA0319-like protein                   | KIAA0319L         | 21793000 | INFINITE |
| P57764    | Gasdermin-D                                                         | GSDMD             | 21789000 | INFINITE |
| Q4U2R6    | 39S ribosomal protein L51, mitochondrial                            | MRPL51            | 21771000 | INFINITE |
| P31641    | Sodium- and chloride-dependent taurine transporter                  | SLC6A6            | 21759000 | INFINITE |
| A6NIH7    | Protein unc-119 homolog B                                           | UNC119B           | 21685000 | INFINITE |
| Q9NZJ6    | Ubiquinone biosynthesis O-methyltransferase, mitochondrial          | COQ3              | 21614000 | INFINITE |
| P52429    | Dialcylglycerol kinase epsilon                                      | DGKE              | 21520000 | INFINITE |
| Q15120    | [Pyruvate dehydrogenase (acetyl-transferring)] kinase               | PK3               | 21518000 | INFINITE |
| Q9UER7    | Death domain-associated protein 6                                   | DAXX              | 21456000 | INFINITE |
| Q9NVV4    | Poly(A) RNA polymerase, mitochondrial                               | MTPAP             | 21409000 | INFINITE |

|           |                                                                            |               |          |          |
|-----------|----------------------------------------------------------------------------|---------------|----------|----------|
| Q9H5J0    | Zinc finger and BTB domain-containing protein 3                            | ZBTB3         | 21359000 | INFINITE |
| Q9UPW5    | Cytosolic carboxypeptidase 1                                               | AGTPBP1       | 21235000 | INFINITE |
| O75688    | Protein phosphatase 1B                                                     | PPM1B         | 21220000 | INFINITE |
| Q16773    | Kynurenine--oxoglutarate transaminase 1                                    | CCBL1         | 21139000 | INFINITE |
| Q96HV5    | Transmembrane protein 41A                                                  | TMEM41A       | 21068000 | INFINITE |
| Q96LJ7    | Dehydrogenase/reductase SDR family member 1                                | DHRS1         | 21030000 | INFINITE |
| Q92508    | Piezo-type mechanosensitive ion channel component 1                        | PIEZO1        | 20938000 | INFINITE |
| Q8N5C7    | DTW domain-containing protein 1                                            | DTWD1         | 20897000 | INFINITE |
| Q9NZQ3    | NCK-interacting protein with SH3 domain                                    | NCKIPSD       | 20872000 | INFINITE |
| P21953    | 2-oxoisovalerate dehydrogenase subunit beta, mitochondrial                 | BCKDHB        | 20868000 | INFINITE |
| Q14409;P3 | Putative glycerol kinase 3;Glycerol kinase                                 | GK3P;GK       | 20838000 | INFINITE |
| P49454    | Centromere protein F                                                       | CENPF         | 20836000 | INFINITE |
| Q96C00    | Zinc finger and BTB domain-containing protein 9                            | ZBTB9         | 20816000 | INFINITE |
| Q96JG6    | Coiled-coil domain-containing protein 132                                  | CCDC132       | 20788000 | INFINITE |
| Q96AJ9    | Vesicle transport through interaction with t-SNARE protein 11A             | VTG11A        | 20696000 | INFINITE |
| Q9H7S9;Q9 | Zinc finger protein 703;Zinc finger protein 503                            | ZNF703;ZNF503 | 20520000 | INFINITE |
| Q9UPM8    | AP-4 complex subunit epsilon-1                                             | AP4E1         | 20411000 | INFINITE |
| Q6P4I2    | WD repeat-containing protein 73                                            | WDR73         | 20405000 | INFINITE |
| O75143    | Autophagy-related protein 13                                               | ATG13         | 20393000 | INFINITE |
| Q7L1V2    | Vacuolar fusion protein MON1 homolog B                                     | MON1B         | 20364000 | INFINITE |
| Q9P2X0    | Dolichol-phosphate mannosyltransferase subunit epsilon-3                   | DPM3          | 20337000 | INFINITE |
| O14524    | Transmembrane protein 194A                                                 | TMEM194A      | 20297000 | INFINITE |
| Q6PI78    | Transmembrane protein 65                                                   | TMEM65        | 20266000 | INFINITE |
| P42771;P4 | Cyclin-dependent kinase inhibitor 2A;Cyclin-dependent kinase 2B            | CDKN2A;CDKN2B | 20219000 | INFINITE |
| Q9Y5W7    | Sorting nexin-14                                                           | SNX14         | 20063000 | INFINITE |
| Q96DT6    | Cysteine protease ATG4C                                                    | ATG4C         | 19965000 | INFINITE |
| Q9BTY2    | Plasma alpha-L-fucosidase                                                  | FUCA2         | 19862000 | INFINITE |
| Q08357    | Sodium-dependent phosphate transporter 2                                   | SLC20A2       | 19743000 | INFINITE |
| P19532    | Transcription factor E3                                                    | TFE3          | 19645000 | INFINITE |
| P15735    | Phosphorylase b kinase gamma catalytic chain, liver                        | PHKG2         | 19615000 | INFINITE |
| Q14562    | ATP-dependent RNA helicase DHX8                                            | DHX8          | 19554000 | INFINITE |
| O75155    | Cullin-associated NEDD8-dissociated protein 2                              | CAND2         | 19554000 | INFINITE |
| Q9BT67    | NEDD4 family-interacting protein 1                                         | NDFIP1        | 19553000 | INFINITE |
| Q86WC4    | Osteopetrosis-associated transmembrane protein 1                           | OSTM1         | 19540000 | INFINITE |
| Q9Y5B8    | Nucleoside diphosphate kinase 7                                            | NME7          | 19523000 | INFINITE |
| O75179    | Ankyrin repeat domain-containing protein 17                                | ANKRD17       | 19490000 | INFINITE |
| O60921    | Checkpoint protein HUS1                                                    | HUS1          | 19455000 | INFINITE |
| Q8NB49    | Phospholipid-transporting ATPase 11C                                       | ATP11C        | 19453000 | INFINITE |
| Q15051    | IQ calmodulin-binding motif-containing protein 1                           | IQCB1         | 19437000 | INFINITE |
| Q68D91    | Metallo-beta-lactamase domain-containing protein 2                         | MBLAC2        | 19378000 | INFINITE |
| Q9NUM4    | Transmembrane protein 106B                                                 | TMEM106B      | 19328000 | INFINITE |
| P38435    | Vitamin K-dependent gamma-carboxylase                                      | GGCX          | 19326000 | INFINITE |
| Q8NEW0    | Zinc transporter 7                                                         | SLC30A7       | 19224000 | INFINITE |
| O60333    | Kinesin-like protein KIF1B                                                 | KIF1B         | 18993000 | INFINITE |
| Q9BX68    | Histidine triad nucleotide-binding protein 2, mitochondrial                | HINT2         | 18980000 | INFINITE |
| Q6NXR4    | TELO2-interacting protein 2                                                | TTI2          | 18977000 | INFINITE |
| O15554    | Intermediate conductance calcium-activated potassium channel subunit alpha | KCNN4         | 18967000 | INFINITE |
| Q92625    | Ankyrin repeat and SAM domain-containing protein 1A                        | ANKS1A        | 18893000 | INFINITE |
| Q7L7X3    | Serine/threonine-protein kinase TAO1                                       | TAOK1         | 18890000 | INFINITE |
| P00813    | Adenosine deaminase                                                        | ADA           | 18817000 | INFINITE |

|           |                                                               |                 |          |          |
|-----------|---------------------------------------------------------------|-----------------|----------|----------|
| Q92997    | Segment polarity protein dishevelled homolog DVL DVL3         |                 | 18794000 | INFINITE |
| O14893    | Gem-associated protein 2                                      | GEMIN2          | 18769000 | INFINITE |
| P22670    | MHC class II regulatory factor RFX1                           | RFX1            | 18707000 | INFINITE |
| Q9ULK4    | Mediator of RNA polymerase II transcription subunit MED23     |                 | 18557000 | INFINITE |
| Q15057    | Arf-GAP with coiled-coil, ANK repeat and PH domain ACAP2      |                 | 18536000 | INFINITE |
| Q9ULH1    | Arf-GAP with SH3 domain, ANK repeat and PH domain ASAP1       |                 | 18484000 | INFINITE |
| P15151    | Poliovirus receptor                                           | PVR             | 18419000 | INFINITE |
| Q9UPY3    | Endoribonuclease Dicer                                        | DICER1          | 18377000 | INFINITE |
| Q96C23    | Aldose 1-epimerase                                            | GALM            | 18355000 | INFINITE |
| Q9BQ04    | RNA-binding protein 4B                                        | RBM4B           | 18306000 | INFINITE |
| Q86UK7    | Zinc finger protein 598                                       | ZNF598          | 18102000 | INFINITE |
| Q9UHR4    | Brain-specific angiogenesis inhibitor 1-associated protein 2  | BAIAP2L1        | 17973000 | INFINITE |
| Q9BWD3;C  | Protein FAM127B;Protein FAM127C                               | FAM127B;FAM127C | 17924000 | INFINITE |
| Q9H1Z4    | WD repeat-containing protein 13                               | WDR13           | 17880000 | INFINITE |
| Q9UNH6    | Sorting nexin-7                                               | SNX7            | 17874000 | INFINITE |
| P55081    | Microfibrillar-associated protein 1                           | MFAP1           | 17872000 | INFINITE |
| P20248    | Cyclin-A2                                                     | CCNA2           | 17773000 | INFINITE |
| Q6UUV9    | CREB-regulated transcription coactivator 1                    | CRTC1           | 17770000 | INFINITE |
| Q96EU7    | C1GALT1-specific chaperone 1                                  | C1GALT1C1       | 17674000 | INFINITE |
| Q8TBE7    | Solute carrier family 35 member G2                            | SLC35G2         | 17649000 | INFINITE |
| Q9NZ63    | Uncharacterized protein C9orf78                               | C9orf78         | 17634000 | INFINITE |
| Q99081    | Transcription factor 12                                       | TCF12           | 17625000 | INFINITE |
| Q9Y3B6    | ER membrane protein complex subunit 9                         | EMC9            | 17560000 | INFINITE |
| Q5F1R6    | DnaJ homolog subfamily C member 21                            | DNAJC21         | 17546000 | INFINITE |
| Q9BRG1    | Vacuolar protein-sorting-associated protein 25                | VPS25           | 17524000 | INFINITE |
| Q9UKV5    | E3 ubiquitin-protein ligase AMFR                              | AMFR            | 17492000 | INFINITE |
| Q99704    | Docking protein 1                                             | DOK1            | 17350000 | INFINITE |
| Q8WVF1    | Protein OSCP1                                                 | OSCP1           | 17224000 | INFINITE |
| Q9UHA3    | Probable ribosome biogenesis protein RLP24                    | RSL24D1         | 17219000 | INFINITE |
| Q9Y3D0    | Mitotic spindle-associated MMXD complex subunit 1             | FAM96B          | 17157000 | INFINITE |
| Q9UMZ2    | Synergin gamma                                                | SYNRG           | 17118000 | INFINITE |
| Q9HAF1    | Chromatin modification-related protein MEAF6                  | MEAF6           | 17106000 | INFINITE |
| Q96K19    | E3 ubiquitin-protein ligase RNF170                            | RNF170          | 17058000 | INFINITE |
| Q9NVH6    | Trimethyllysine dioxygenase, mitochondrial                    | TMLHE           | 17037000 | INFINITE |
| Q13472    | DNA topoisomerase 3-alpha                                     | TOP3A           | 17032000 | INFINITE |
| Q13541    | Eukaryotic translation initiation factor 4E-binding protein 1 | EIF4EBP1        | 17003000 | INFINITE |
| Q9UHL4    | Dipeptidyl peptidase 2                                        | DPP7            | 16961000 | INFINITE |
| Q9NRW1    | Ras-related protein Rab-6B                                    | RAB6B           | 16946000 | INFINITE |
| P82921    | 28S ribosomal protein S21, mitochondrial                      | MRPS21          | 16928000 | INFINITE |
| Q8IW35    | Centrosomal protein of 97 kDa                                 | CEP97           | 16913000 | INFINITE |
| P09493    | Tropomyosin alpha-1 chain                                     | TPM1            | 16888000 | INFINITE |
| Q7Z7N9    | Transmembrane protein 179B                                    | TMEM179B        | 16863000 | INFINITE |
| O60238    | BCL2/adenovirus E1B 19 kDa protein-interacting protein 3L     | BNIP3L          | 16756000 | INFINITE |
| P49427    | Ubiquitin-conjugating enzyme E2 R1                            | CDC34           | 16744000 | INFINITE |
| Q9H3Q1    | Cdc42 effector protein 4                                      | CDC42EP4        | 16661000 | INFINITE |
| Q9BZQ6    | ER degradation-enhancing alpha-mannosidase-like protein 3     | EDEM3           | 16652000 | INFINITE |
| Q9NWW5    | Ceroid-lipofuscinosis neuronal protein 6                      | CLN6            | 16640000 | INFINITE |
| Q9NQ89    | Protein C12orf4                                               | C12orf4         | 16605000 | INFINITE |
| Q9BVC5    | Ashwin                                                        | C2orf49         | 16597000 | INFINITE |
| Q99717;Q1 | Mothers against decapentaplegic homolog 5;Moth of the eye 5   | SMAD5;SMAD1     | 16502000 | INFINITE |

|            |                                                         |          |          |          |
|------------|---------------------------------------------------------|----------|----------|----------|
| Q6IPR3     | tRNA wybutosine-synthesizing protein 3 homolog          | TYW3     | 16386000 | INFINITE |
| Q14BN4     | Sarcolemmal membrane-associated protein                 | SLMAP    | 16357000 | INFINITE |
| Q7L5Y9     | Macrophage erythroblast attacher                        | MAEA     | 16342000 | INFINITE |
| Q9NR77     | Peroxisomal membrane protein 2                          | PXMP2    | 16322000 | INFINITE |
| Q562E7     | WD repeat-containing protein 81                         | WDR81    | 16277000 | INFINITE |
| Q9Y6X4     | Soluble lamin-associated protein of 75 kDa              | FAM169A  | 16213000 | INFINITE |
| Q96G74     | OTU domain-containing protein 5                         | OTUD5    | 16135000 | INFINITE |
| O43286     | Beta-1,4-galactosyltransferase 5                        | B4GALT5  | 16088000 | INFINITE |
| Q96QA5     | Gasdermin-A                                             | GSDMA    | 16068000 | INFINITE |
| A0A1B0GTU1 |                                                         |          | 16038000 | INFINITE |
| Q9P2K8     | Eukaryotic translation initiation factor 2-alpha kina   | EIF2AK4  | 15957000 | INFINITE |
| P58557     | Putative ribonuclease                                   | YBEY     | 15924000 | INFINITE |
| Q96P11     | Probable 28S rRNA (cytosine-C(5))-methyltransferase     | NSUN5    | 15909000 | INFINITE |
| Q7RTS9     | Dymeclin                                                | DYM      | 15874000 | INFINITE |
| Q8TBY8     | Polyamine-modulated factor 1-binding protein 1          | PMFBP1   | 15806000 | INFINITE |
| Q5VW38     | Protein GPR107                                          | GPR107   | 15804000 | INFINITE |
| Q8N8R5     | UPF0565 protein C2orf69                                 | C2orf69  | 15788000 | INFINITE |
| Q9BSC4     | Nucleolar protein 10                                    | NOL10    | 15671000 | INFINITE |
| A0A1B0GV1  | TRPM8 channel-associated factor 2                       | TCAF2    | 15547000 | INFINITE |
| Q00587     | Cdc42 effector protein 1                                | CDC42EP1 | 15514000 | INFINITE |
| Q8NFH5     | Nucleoporin NUP53                                       | NUP35    | 15507000 | INFINITE |
| Q5VVQ6     | Ubiquitin thioesterase OTU1                             | YOD1     | 15483000 | INFINITE |
| Q9H1Y0     | Autophagy protein 5                                     | ATG5     | 15439000 | INFINITE |
| Q5MIZ7     | Serine/threonine-protein phosphatase 4 regulator        | SMEK2    | 15396000 | INFINITE |
| O94763     | Unconventional prefoldin RPB5 interactor 1              | URI1     | 15329000 | INFINITE |
| Q969Q5     | Ras-related protein Rab-24                              | RAB24    | 15280000 | INFINITE |
| Q8WXH0     | Nesprin-2                                               | SYNE2    | 15269000 | INFINITE |
| Q9BQI0     | Allograft inflammatory factor 1-like                    | AIF1L    | 15223000 | INFINITE |
| Q96T23     | Remodeling and spacing factor 1                         | RSF1     | 15217000 | INFINITE |
| Q9BW19     | Kinesin-like protein KIFC1                              | KIFC1    | 15189000 | INFINITE |
| Q9NX00     | Transmembrane protein 160                               | TMEM160  | 15143000 | INFINITE |
| Q6QNY0     | Biogenesis of lysosome-related organelles complex 5     | BLOC1S3  | 15077000 | INFINITE |
| Q13416     | Origin recognition complex subunit 2                    | ORC2     | 15042000 | INFINITE |
| Q8NI36     | WD repeat-containing protein 36                         | WDR36    | 15037000 | INFINITE |
| Q9P2X3     | Protein IMPACT                                          | IMPACT   | 14963000 | INFINITE |
| Q9NS91     | E3 ubiquitin-protein ligase RAD18                       | RAD18    | 14958000 | INFINITE |
| Q6BDS2     | UHRF1-binding protein 1                                 | UHRF1BP1 | 14898000 | INFINITE |
| Q9BTX7     | Alpha-tocopherol transfer protein-like                  | TTPAL    | 14881000 | INFINITE |
| Q12884     | Prolyl endopeptidase FAP;Antiplasmin-cleaving enzyme    | FAP      | 14862000 | INFINITE |
| Q6VN20     | Ran-binding protein 10                                  | RANBP10  | 14792000 | INFINITE |
| O95210     | Starch-binding domain-containing protein 1              | STBD1    | 14779000 | INFINITE |
| Q96Q45     | Transmembrane protein 237                               | TMEM237  | 14762000 | INFINITE |
| Q9H6U8     | Alpha-1,2-mannosyltransferase ALG9                      | ALG9     | 14719000 | INFINITE |
| P32780     | General transcription factor IIH subunit 1              | GTF2H1   | 14640000 | INFINITE |
| P50336     | Protoporphyrinogen oxidase                              | PPOX     | 14608000 | INFINITE |
| Q9Y653     | G-protein coupled receptor 56;GPR56 N-terminal fragment | GPR56    | 14547000 | INFINITE |
| Q53S33     | Bola-like protein 3                                     | BOLA3    | 14523000 | INFINITE |
| Q8NHV4     | Protein NEDD1                                           | NEDD1    | 14459000 | INFINITE |
| Q9Y3Q3     | Transmembrane emp24 domain-containing protein 3         | TMED3    | 14446000 | INFINITE |
| Q6ZSJ8     | Uncharacterized protein C1orf122                        | C1orf122 | 14444000 | INFINITE |

|           |                                                           |               |          |          |
|-----------|-----------------------------------------------------------|---------------|----------|----------|
| Q99735    | Microsomal glutathione S-transferase 2                    | MGST2         | 14311000 | INFINITE |
| Q8IW45    | ATP-dependent (S)-NAD(P)H-hydrate dehydratase             | CARKD         | 14115000 | INFINITE |
| Q9UM13    | Anaphase-promoting complex subunit 10                     | ANAPC10       | 14108000 | INFINITE |
| O15541    | RING finger protein 113A                                  | RNF113A       | 14097000 | INFINITE |
| Q9Y448    | Small kinetochore-associated protein                      | KNSTRN        | 14050000 | INFINITE |
| Q8TEB9    | Rhomboid-related protein 4                                | RHBDD1        | 14041000 | INFINITE |
| Q96BN8    | Ubiquitin thioesterase otulin                             | OTULIN        | 14014000 | INFINITE |
| Q5T8D3    | Acyl-CoA-binding domain-containing protein 5              | ACBD5         | 14004000 | INFINITE |
| O75530    | Polycomb protein EED                                      | EED           | 13964000 | INFINITE |
| Q96BN2    | Transcriptional adapter 1                                 | TADA1         | 13918000 | INFINITE |
| Q9NZ43    | Vesicle transport protein USE1                            | USE1          | 13889000 | INFINITE |
| Q6ZRQ5    | Protein MMS22-like                                        | MMS22L        | 13881000 | INFINITE |
| Q8N138    | ORM1-like protein 3                                       | ORMDL3        | 13821000 | INFINITE |
| Q96RF0    | Sorting nexin-18                                          | SNX18         | 13796000 | INFINITE |
| P13686    | Tartrate-resistant acid phosphatase type 5                | ACP5          | 13787000 | INFINITE |
| Q9Y619    | Mitochondrial ornithine transporter 1                     | SLC25A15      | 13768000 | INFINITE |
| Q6AI08    | HEAT repeat-containing protein 6                          | HEATR6        | 13728000 | INFINITE |
| Q7Z5H3    | Rho GTPase-activating protein 22                          | ARHGAP22      | 13726000 | INFINITE |
| P51606    | N-acylglucosamine 2-epimerase                             | RENBP         | 13699000 | INFINITE |
| P01594;P0 | Ig kappa chain V-I region AU;Ig kappa chain V-I region AG |               | 13699000 | INFINITE |
| Q9BRS2    | Serine/threonine-protein kinase RIO1                      | RIOK1         | 13543000 | INFINITE |
| Q4VCS5;Q8 | Angiomotin;Angiomotin-like protein 1                      | AMOT;AMOTL1   | 13478000 | INFINITE |
| Q9UBS8    | E3 ubiquitin-protein ligase RNF14                         | RNF14         | 13384000 | INFINITE |
| P54646    | 5-AMP-activated protein kinase catalytic subunit a        | PRKAA2        | 13348000 | INFINITE |
| Q96C11    | FGGY carbohydrate kinase domain-containing prot           | FGGY          | 13320000 | INFINITE |
| Q7Z4F1    | Low-density lipoprotein receptor-related protein 1        | LRP10         | 13140000 | INFINITE |
| Q2VPB7    | AP-5 complex subunit beta-1                               | AP5B1         | 13038000 | INFINITE |
| P0CG08;B7 | Golgi pH regulator B;Golgi pH regulator A                 | GPR89B;GPR89A | 12987000 | INFINITE |
| Q9UJK0    | Ribosome biogenesis protein TSR3 homolog                  | TSR3          | 12982000 | INFINITE |
| Q9H6Y2    | WD repeat-containing protein 55                           | WDR55         | 12969000 | INFINITE |
| O43759    | Synaptogyrin-1                                            | SYNGR1        | 12939000 | INFINITE |
| Q9H1A3    | Methyltransferase-like protein 9                          | METTL9        | 12889000 | INFINITE |
| Q00653    | Nuclear factor NF-kappa-B p100 subunit;Nuclear fa         | NFKB2         | 12875000 | INFINITE |
| Q96JC1    | Vam6/Vps39-like protein                                   | VPS39         | 12736000 | INFINITE |
| O94788    | Retinal dehydrogenase 2                                   | ALDH1A2       | 12730000 | INFINITE |
| Q15274    | Nicotinate-nucleotide pyrophosphorylase [carboxy          | QPRT          | 12715000 | INFINITE |
| P38432    | Coilin                                                    | COIL          | 12680000 | INFINITE |
| P35367    | Histamine H1 receptor                                     | HRH1          | 12661000 | INFINITE |
| Q86UA6    | RPA-interacting protein                                   | RPAIN         | 12649000 | INFINITE |
| Q96ES7    | SAGA-associated factor 29 homolog                         | CCDC101       | 12567000 | INFINITE |
| Q86V85    | Integral membrane protein GPR180                          | GPR180        | 12502000 | INFINITE |
| Q8TDM6    | Disks large homolog 5                                     | DLG5          | 12437000 | INFINITE |
| Q9BT88    | Synaptotagmin-11                                          | SYT11         | 12364000 | INFINITE |
| Q96RU3    | Formin-binding protein 1                                  | FNBP1         | 12318000 | INFINITE |
| Q9UBL6    | Copine-7                                                  | CPNE7         | 12290000 | INFINITE |
| O75943    | Cell cycle checkpoint protein RAD17                       | RAD17         | 12144000 | INFINITE |
| P52564    | Dual specificity mitogen-activated protein kinase k       | MAP2K6        | 12014000 | INFINITE |
| A4D1P6    | WD repeat-containing protein 91                           | WDR91         | 11982000 | INFINITE |
| Q8IXW5    | Putative RNA polymerase II subunit B1 CTD phospho         | RPAP2         | 11890000 | INFINITE |
| Q9UK73    | Protein fem-1 homolog B                                   | FEM1B         | 11861000 | INFINITE |

|        |                                                       |          |          |          |
|--------|-------------------------------------------------------|----------|----------|----------|
| P11274 | Breakpoint cluster region protein                     | BCR      | 11802000 | INFINITE |
| Q8NEZ2 | Vacuolar protein sorting-associated protein 37A       | VPS37A   | 11691000 | INFINITE |
| O43353 | Receptor-interacting serine/threonine-protein kinase  | RIPK2    | 11683000 | INFINITE |
| Q53FT3 | Protein Hikeshi                                       | C11orf73 | 11640000 | INFINITE |
| O14772 | Fucose-1-phosphate guanylyltransferase                | FPGT     | 11503000 | INFINITE |
| Q8N5A5 | Zinc finger CCCH-type with G patch domain-containing  | ZGPAT    | 11368000 | INFINITE |
| Q96PV6 | Leukocyte receptor cluster member 8                   | LENG8    | 11348000 | INFINITE |
| Q9Y6M5 | Zinc transporter 1                                    | SLC30A1  | 11301000 | INFINITE |
| Q8N3P4 | Vacuolar protein sorting-associated protein 8 homolog | VPS8     | 11234000 | INFINITE |
| Q9H173 | Nucleotide exchange factor SIL1                       | SIL1     | 11212000 | INFINITE |
| Q9NXG6 | Transmembrane prolyl 4-hydroxylase                    | P4HTM    | 11194000 | INFINITE |
| Q96B02 | Ubiquitin-conjugating enzyme E2 W                     | UBE2W    | 11186000 | INFINITE |
| Q969Y2 | tRNA modification GTPase GTPBP3, mitochondrial        | GTPBP3   | 11148000 | INFINITE |
| O43826 | Glucose-6-phosphate translocase                       | SLC37A4  | 11109000 | INFINITE |
| P54252 | Ataxin-3                                              | ATXN3    | 11076000 | INFINITE |
| Q9Y248 | DNA replication complex GINS protein PSF2             | GINS2    | 11049000 | INFINITE |
| Q14966 | Zinc finger protein 638                               | ZNF638   | 10991000 | INFINITE |
| Q9Y2S2 | Lambda-crystallin homolog                             | CRYL1    | 10990000 | INFINITE |
| Q9H6U6 | Breast carcinoma-amplified sequence 3                 | BCAS3    | 10978000 | INFINITE |
| Q5HYI7 | Metaxin-3                                             | MTX3     | 10956000 | INFINITE |
| Q49A17 | Polypeptide N-acetylgalactosaminyltransferase-like    | GALNTL6  | 10898000 | INFINITE |
| A5PLN9 | Trafficking protein particle complex subunit 13       | TRAPPC13 | 10879000 | INFINITE |
| Q15814 | Tubulin-specific chaperone C                          | TBCC     | 10839000 | INFINITE |
| Q9NZN5 | Rho guanine nucleotide exchange factor 12             | ARHGEF12 | 10819000 | INFINITE |
| Q55RE7 | Phytanoyl-CoA dioxygenase domain-containing protein   | PHYHD1   | 10787000 | INFINITE |
| P01112 | GTPase HRas;GTPase HRas, N-terminally processed       | HRAS     | 10702000 | INFINITE |
| O75864 | Protein phosphatase 1 regulatory subunit 37           | PPP1R37  | 10657000 | INFINITE |
| Q9BSE5 | Agmatinase, mitochondrial                             | AGMAT    | 10657000 | INFINITE |
| Q99943 | 1-acyl-sn-glycerol-3-phosphate acyltransferase alpha  | AGPAT1   | 10622000 | INFINITE |
| Q8WVQ1 | Soluble calcium-activated nucleotidase 1              | CANT1    | 10604000 | INFINITE |
| O43301 | Heat shock 70 kDa protein 12A                         | HSPA12A  | 10590000 | INFINITE |
| Q969S2 | Endonuclease 8-like 2                                 | NEIL2    | 10581000 | INFINITE |
| Q9UKT5 | F-box only protein 4                                  | FBXO4    | 10547000 | INFINITE |
| P26374 | Rab proteins geranylgeranyltransferase component      | CHML     | 10494000 | INFINITE |
| P05090 | Apolipoprotein D                                      | APOD     | 10392000 | INFINITE |
| Q96JQ2 | Calmin                                                | CLMN     | 10378000 | INFINITE |
| Q9NUP7 | tRNA:m(4)X modification enzyme TRM13 homolog          | TRMT13   | 10357000 | INFINITE |
| Q9NWH9 | SAFB-like transcription modulator                     | SLTM     | 10355000 | INFINITE |
| O75379 | Vesicle-associated membrane protein 4                 | VAMP4    | 10342000 | INFINITE |
| Q6PJ69 | Tripartite motif-containing protein 65                | TRIM65   | 10338000 | INFINITE |
| Q96QG7 | Myotubularin-related protein 9                        | MTMR9    | 10314000 | INFINITE |
| P01040 | Cystatin-A;Cystatin-A, N-terminally processed         | CSTA     | 10288000 | INFINITE |
| Q14574 | Desmocollin-3                                         | DSC3     | 10248000 | INFINITE |
| Q9UJC5 | SH3 domain-binding glutamic acid-rich-like protein    | SH3BGR2  | 10211000 | INFINITE |
| Q9H7E9 | UPF0488 protein C8orf33                               | C8orf33  | 10188000 | INFINITE |
| Q8N573 | Oxidation resistance protein 1                        | OXR1     | 10145000 | INFINITE |
| P34741 | Syndecan-2                                            | SDC2     | 10119000 | INFINITE |
| Q96EP0 | E3 ubiquitin-protein ligase RNF31                     | RNF31    | 10055000 | INFINITE |
| Q9UDY4 | DnaJ homolog subfamily B member 4                     | DNAJB4   | 10055000 | INFINITE |
| Q53TN4 | Cytochrome b reductase 1                              | CYBRD1   | 10022000 | INFINITE |



|                      |                                                                             |             |         |          |          |
|----------------------|-----------------------------------------------------------------------------|-------------|---------|----------|----------|
| O43741               | 5-AMP-activated protein kinase subunit beta-2                               | PRKAB2      | 9987000 | INFINITE |          |
| Q6P3X3               | Tetratricopeptide repeat protein 27                                         | TTC27       | 9966100 | INFINITE |          |
| Q9NV35               | Probable 8-oxo-dGTP diphosphatase                                           | NUDT15      | 9958300 | INFINITE |          |
| Q7Z5R6               | Amyloid beta A4 precursor protein-binding family 1                          | APBB1IP     | 9887800 | INFINITE |          |
| P51843               | Nuclear receptor subfamily 0 group B member 1                               | NR0B1       | 9870800 | INFINITE |          |
| Q9BRX5               | DNA replication complex GINS protein                                        | PSF3        | GINS3   | 9866600  | INFINITE |
| Q9H8H2               | Probable ATP-dependent RNA helicase                                         | DDX31       | DDX31   | 9864700  | INFINITE |
| O43572               | A-kinase anchor protein 10, mitochondrial                                   | AKAP10      | 9855500 | INFINITE |          |
| Q9H4I9               | Essential MCU regulator, mitochondrial                                      | SMDT1       | 9842600 | INFINITE |          |
| Q96MG8               | Protein-L-isoaspartate O-methyltransferase domain                           | PCMTD1      | 9830000 | INFINITE |          |
| O76075               | DNA fragmentation factor subunit beta                                       | DFFB        | 9823600 | INFINITE |          |
| Q9BQL6               | Fermitin family homolog 1                                                   | FERMT1      | 9762800 | INFINITE |          |
| O43164               | E3 ubiquitin-protein ligase Praja-2                                         | PJA2        | 9751800 | INFINITE |          |
| Q6NT16               | MFS-type transporter                                                        | SLC18B1     | SLC18B1 | 9739400  | INFINITE |
| Q05655               | Protein kinase C delta type;Protein kinase C delta type                     | PRKCD       | 9730400 | INFINITE |          |
| Q9NPH0               | Lysophosphatidic acid phosphatase type 6                                    | ACP6        | 9705600 | INFINITE |          |
| Q07820               | Induced myeloid leukemia cell differentiation protein                       | MCL1        | 9702400 | INFINITE |          |
| Q9H7F4               | Transmembrane protein 185B                                                  | TMEM185B    | 9584200 | INFINITE |          |
| P05423               | DNA-directed RNA polymerase III subunit                                     | RPC4        | POLR3D  | 9584200  | INFINITE |
| Q9C0B7               | Transport and Golgi organization protein 6 homolog                          | TANGO6      | 9519100 | INFINITE |          |
| Q96EX1               | Small integral membrane protein 12                                          | SMIM12      | 9465200 | INFINITE |          |
| P36897               | TGF-beta receptor type-1                                                    | TGFBR1      | 9434500 | INFINITE |          |
| Q8IX05               | CD302 antigen                                                               | CD302       | 9344800 | INFINITE |          |
| Q8TCG2               | Phosphatidylinositol 4-kinase type 2-beta                                   | PI4K2B      | 9325600 | INFINITE |          |
| Q12955               | Ankyrin-3                                                                   | ANK3        | 9325100 | INFINITE |          |
| Q8NCM8               | Cytoplasmic dynein 2 heavy chain 1                                          | DYNC2H1     | 9322700 | INFINITE |          |
| P29590               | Protein PML                                                                 | PML         | 9295100 | INFINITE |          |
| Q5VU43               | Myomegalin                                                                  | PDE4DIP     | 9244200 | INFINITE |          |
| Q9P2W1               | Homologous-pairing protein 2 homolog                                        | PSMC3IP     | 9239600 | INFINITE |          |
| Q9NUJ3               | T-complex protein 11-like protein 1                                         | TCP11L1     | 9174200 | INFINITE |          |
| Q14807               | Kinesin-like protein KIF22                                                  | KIF22       | 8979900 | INFINITE |          |
| O15379               | Histone deacetylase 3                                                       | HDAC3       | 8965200 | INFINITE |          |
| Q9BSL1               | Ubiquitin-associated domain-containing protein 1                            | UBAC1       | 8929400 | INFINITE |          |
| P25445               | Tumor necrosis factor receptor superfamily member 1                         | FAS         | 8892800 | INFINITE |          |
| Q86VN1               | Vacuolar protein-sorting-associated protein 36                              | VPS36       | 8865600 | INFINITE |          |
| Q14692               | Ribosome biogenesis protein BMS1 homolog                                    | BMS1        | 8779100 | INFINITE |          |
| A3KN83;Q96BY7;Q96BY8 | Protein strawberry notch homolog 1;Protein strawberry notch homolog 2       | SBNO1;SBNO2 | 8729900 | INFINITE |          |
| Q96BY7;Q96BY8        | Autophagy-related protein 2 homolog B;Autophagy-related protein 2 homolog A | ATG2B;ATG2A | 8688800 | INFINITE |          |
| Q5R372               | Rab GTPase-activating protein 1-like                                        | RABGAP1L    | 8631000 | INFINITE |          |
| Q8TDI0               | Chromodomain-helicase-DNA-binding protein 5                                 | CHD5        | 8568900 | INFINITE |          |
| Q9P1Z2               | Calcium-binding and coiled-coil domain-containing protein 1                 | CALCOCO1    | 8506800 | INFINITE |          |
| Q5VZL5               | Zinc finger MYM-type protein 4                                              | ZMYM4       | 8455700 | INFINITE |          |
| Q99707               | Methionine synthase                                                         | MTR         | 8435800 | INFINITE |          |
| Q8N5I4               | Dehydrogenase/reductase SDR family member on chromosome 10                  | DHRSX       | 8371600 | INFINITE |          |
| Q9H3F6               | BTB/POZ domain-containing adapter for CUL3-mediated ubiquitination          | KCTD10      | 8318700 | INFINITE |          |
| Q9BXW6               | Oxysterol-binding protein-related protein 1                                 | OSBPL1A     | 8284300 | INFINITE |          |
| Q6KC79               | Nipped-B-like protein                                                       | NIPBL       | 8229200 | INFINITE |          |
| Q15007               | Pre-mRNA-splicing regulator                                                 | WTAP        | 8178800 | INFINITE |          |
| P50548               | ETS domain-containing transcription factor                                  | ERF         | 8141000 | INFINITE |          |
| Q9H6B4               | CXADR-like membrane protein                                                 | CLMP        | 8044000 | INFINITE |          |

|        |                                                               |          |         |          |
|--------|---------------------------------------------------------------|----------|---------|----------|
| Q9NVM6 | DnaJ homolog subfamily C member 17                            | DNAJC17  | 8029700 | INFINITE |
| Q9ULE4 | Protein FAM184B                                               | FAM184B  | 7973100 | INFINITE |
| Q16610 | Extracellular matrix protein 1                                | ECM1     | 7853100 | INFINITE |
| Q9H4B0 | Probable tRNA N6-adenosine threonylcarbamoyltr                | OSGEPL1  | 7815400 | INFINITE |
| Q00534 | Cyclin-dependent kinase 6                                     | CDK6     | 7705500 | INFINITE |
| Q96J17 | Spatacsin                                                     | SPG11    | 7623500 | INFINITE |
| Q5TF21 | Protein SOGA3                                                 | SOGA3    | 7622200 | INFINITE |
| Q6DKK2 | Tetratricopeptide repeat protein 19, mitochondria             | TTC19    | 7572500 | INFINITE |
| P28749 | Retinoblastoma-like protein 1                                 | RBL1     | 7550700 | INFINITE |
| Q9BQE4 | Selenoprotein S                                               | VIMP     | 7538600 | INFINITE |
| Q5TGY1 | Transmembrane and coiled-coil domain-containing               | TMCO4    | 7511000 | INFINITE |
| P22735 | Protein-glutamine gamma-glutamyltransferase K                 | TGM1     | 7457200 | INFINITE |
| P36222 | Chitinase-3-like protein 1                                    | CHI3L1   | 7426900 | INFINITE |
| P27482 | Calmodulin-like protein 3                                     | CALML3   | 7379000 | INFINITE |
| P07476 | Involucrin                                                    | IVL      | 7377100 | INFINITE |
| Q14164 | Inhibitor of nuclear factor kappa-B kinase subunit $\epsilon$ | IKBKE    | 7366100 | INFINITE |
| Q8NH53 | Major facilitator superfamily domain-containing pr            | MFSD8    | 7365500 | INFINITE |
| Q8TF71 | Monocarboxylate transporter 10                                | SLC16A10 | 7359600 | INFINITE |
| Q9NQY0 | Bridging integrator 3                                         | BIN3     | 7265300 | INFINITE |
| P04196 | Histidine-rich glycoprotein                                   | HRG      | 7261200 | INFINITE |
| P51451 | Tyrosine-protein kinase Blk                                   | BLK      | 7222900 | INFINITE |
| O15155 | BET1 homolog                                                  | BET1     | 7210800 | INFINITE |
| Q8IU60 | m7GpppN-mRNA hydrolase                                        | DCP2     | 7192000 | INFINITE |
| O15156 | Zinc finger and BTB domain-containing protein 7B              | ZBTB7B   | 7168900 | INFINITE |
| Q9Y2K2 | Serine/threonine-protein kinase SIK3                          | SIK3     | 7165300 | INFINITE |
| Q92503 | SEC14-like protein 1                                          | SEC14L1  | 7040900 | INFINITE |
| O15381 | Nuclear valosin-containing protein-like                       | NVL      | 6958400 | INFINITE |
| Q92968 | Peroxisomal membrane protein PEX13                            | PEX13    | 6899800 | INFINITE |
| O14682 | Ectoderm-neural cortex protein 1                              | ENC1     | 6847900 | INFINITE |
| Q9NSV4 | Protein diaphanous homolog 3                                  | DIAPH3   | 6839200 | INFINITE |
| P54098 | DNA polymerase subunit gamma-1                                | POLG     | 6821800 | INFINITE |
| Q14676 | Mediator of DNA damage checkpoint protein 1                   | MDC1     | 6812200 | INFINITE |
| O75554 | WW domain-binding protein 4                                   | WBP4     | 6762000 | INFINITE |
| P01034 | Cystatin-C                                                    | CST3     | 6760400 | INFINITE |
| Q02040 | A-kinase anchor protein 17A                                   | AKAP17A  | 6725900 | INFINITE |
| Q5VSL9 | Striatin-interacting protein 1                                | STRIP1   | 6698500 | INFINITE |
| P35754 | Glutaredoxin-1                                                | GLRX     | 6616300 | INFINITE |
| Q96FZ2 | Embryonic stem cell-specific 5-hydroxymethylcyto:             | HMCE5    | 6589700 | INFINITE |
| Q9UKG9 | Peroxisomal carnitine O-octanoyltransferase                   | CROT     | 6527300 | INFINITE |
| Q8TEU7 | Rap guanine nucleotide exchange factor 6                      | RAPGEF6  | 6523100 | INFINITE |
| Q9Y2G8 | DnaJ homolog subfamily C member 16                            | DNAJC16  | 6482200 | INFINITE |
| Q9P2G1 | Ankyrin repeat and IBR domain-containing protein              | ANKIB1   | 6400700 | INFINITE |
| Q6JQN1 | Acyl-CoA dehydrogenase family member 10                       | ACAD10   | 6353700 | INFINITE |
| Q8N7R7 | Cyclin-Y-like protein 1                                       | CCNYL1   | 6331900 | INFINITE |
| Q6P1R4 | tRNA-dihydrouridine(16/17) synthase [NAD(P)(+)]-              | DUS1L    | 6276100 | INFINITE |
| Q8TBK6 | Zinc finger CCHC domain-containing protein 10                 | ZCCHC10  | 6171300 | INFINITE |
| Q96DF8 | Protein DGCR14                                                | DGCR14   | 6106600 | INFINITE |
| O00635 | E3 ubiquitin-protein ligase TRIM38                            | TRIM38   | 6055200 | INFINITE |
| Q01432 | AMP deaminase 3                                               | AMPD3    | 6048400 | INFINITE |
| Q9Y3A4 | Ribosomal RNA-processing protein 7 homolog A                  | RRP7A    | 6037400 | INFINITE |

|               |                                                                         |             |         |          |
|---------------|-------------------------------------------------------------------------|-------------|---------|----------|
| Q9UJX6        | Anaphase-promoting complex subunit 2                                    | ANAPC2      | 6012800 | INFINITE |
| O76024        | Wolframin                                                               | WFS1        | 6004300 | INFINITE |
| P78332        | RNA-binding protein 6                                                   | RBM6        | 5970400 | INFINITE |
| P18440        | Arylamine N-acetyltransferase 1                                         | NAT1        | 5956100 | INFINITE |
| Q14687        | Genetic suppressor element 1                                            | GSE1        | 5911700 | INFINITE |
| P61244        | Protein max                                                             | MAX         | 5888100 | INFINITE |
| Q56A73        | Spindlin-4                                                              | SPIN4       | 5861800 | INFINITE |
| Q8N302        | Angiogenic factor with G patch and FHA domains 1                        | AGGF1       | 5847200 | INFINITE |
| Q86WQ0        | Nuclear receptor 2C2-associated protein                                 | NR2C2AP     | 5802300 | INFINITE |
| Q9NYL4        | Peptidyl-prolyl cis-trans isomerase FKBP11                              | FKBP11      | 5781400 | INFINITE |
| Q9H871        | Protein RMD5 homolog A                                                  | RMND5A      | 5764000 | INFINITE |
| O95319        | CUGBP Elav-like family member 2                                         | CELF2       | 5745900 | INFINITE |
| O60507        | Protein-tyrosine sulfotransferase 1                                     | TPST1       | 5640500 | INFINITE |
| P04259        | Keratin, type II cytoskeletal 6B                                        | KRT6B       | 5606400 | INFINITE |
| Q9UPN4        | Centrosomal protein of 131 kDa                                          | CEP131      | 5543200 | INFINITE |
| Q9BT09        | Protein canopy homolog 3                                                | CNPY3       | 5534600 | INFINITE |
| Q9H467        | CUE domain-containing protein 2                                         | CUEDC2      | 5506800 | INFINITE |
| Q86X29        | Lipolysis-stimulated lipoprotein receptor                               | LSR         | 5442200 | INFINITE |
| Q13835        | Plakophilin-1                                                           | PKP1        | 5416600 | INFINITE |
| Q9H1J1        | Regulator of nonsense transcripts 3A                                    | UPF3A       | 5294600 | INFINITE |
| Q9HAU0        | Pleckstrin homology domain-containing family A member 5                 | PLEKHA5     | 5200800 | INFINITE |
| Q30154        | HLA class II histocompatibility antigen, DR beta 5 chain                | HLA-DRB5    | 5177700 | INFINITE |
| Q8TEV9        | Smith-Magenis syndrome chromosomal region carrier                       | SMCR8       | 5156300 | INFINITE |
| P60880        | Synaptosomal-associated protein 25                                      | SNAP25      | 5100000 | INFINITE |
| O95619        | YEATS domain-containing protein 4                                       | YEATS4      | 5036600 | INFINITE |
| Q96D09        | G-protein coupled receptor-associated sorting protein 2                 | GPRASP2     | 5029400 | INFINITE |
| Q96PZ2        | Protein FAM111A                                                         | FAM111A     | 5016200 | INFINITE |
| P37198        | Nuclear pore glycoprotein p62                                           | NUP62       | 5001600 | INFINITE |
| Q12933        | TNF receptor-associated factor 2                                        | TRAF2       | 4920400 | INFINITE |
| O43318        | Mitogen-activated protein kinase kinase kinase 7                        | MAP3K7      | 4883000 | INFINITE |
| O14681        | Etoposide-induced protein 2.4 homolog                                   | EI24        | 4831500 | INFINITE |
| Q96GM5        | SWI/SNF-related matrix-associated actin-dependent nuclear corepressor 1 | SMARCD1     | 4781000 | INFINITE |
| Q6NXT6        | Transmembrane anterior posterior transformation 1                       | TAPT1       | 4618200 | INFINITE |
| P17482        | Homeobox protein Hox-B9                                                 | HOXB9       | 4614200 | INFINITE |
| Q9NPJ6        | Mediator of RNA polymerase II transcription subunit 4                   | MED4        | 4599200 | INFINITE |
| Q96NX9;Q96NX8 | Dachshund homolog 2;Dachshund homolog 1                                 | DACH2;DACH1 | 4563300 | INFINITE |
| Q9HCY8        | Protein S100-A14                                                        | S100A14     | 4519000 | INFINITE |
| Q12983        | BCL2/adenovirus E1B 19 kDa protein-interacting protein 3                | BNIP3       | 4461200 | INFINITE |
| O75528        | Transcriptional adapter 3                                               | TADA3       | 4410200 | INFINITE |
| P07948;P07947 | Tyrosine-protein kinase Lyn;Tyrosine-protein kinase                     | LYN;HCK     | 4399100 | INFINITE |
| Q5BKX5        | UPF0692 protein C19orf54                                                | C19orf54    | 4202500 | INFINITE |
| Q96RU2        | Ubiquitin carboxyl-terminal hydrolase 28                                | USP28       | 4186400 | INFINITE |
| Q9BVS5        | tRNA (adenine(58)-N(1))-methyltransferase, mitochondrial                | TRMT61B     | 4156000 | INFINITE |
| Q96HJ9        | UPF0562 protein C7orf55                                                 | C7orf55     | 4154300 | INFINITE |
| P01833        | Polymeric immunoglobulin receptor;Secretory component                   | PIGR        | 4145700 | INFINITE |
| Q02338        | D-beta-hydroxybutyrate dehydrogenase, mitochondrial                     | BDH1        | 4065600 | INFINITE |
| Q9BXS4        | Transmembrane protein 59                                                | TMEM59      | 4003000 | INFINITE |
| Q9BVJ7        | Dual specificity protein phosphatase 23                                 | DUSP23      | 3959500 | INFINITE |
| Q2TAM9        | Tumor suppressor candidate gene 1 protein                               | TUSC1       | 3889600 | INFINITE |
| P52657        | Transcription initiation factor IIA subunit 2                           | GTF2A2      | 3660200 | INFINITE |

|           |                                                     |           |         |          |
|-----------|-----------------------------------------------------|-----------|---------|----------|
| Q8N4C8    | Misshapen-like kinase 1                             | MINK1     | 3410000 | INFINITE |
| O60279    | Sushi domain-containing protein 5                   | SUSD5     | 3362100 | INFINITE |
| O60551    | Glycylpeptide N-tetradecanoyltransferase 2          | NMT2      | 3204700 | INFINITE |
| Q9BPX6    | Calcium uptake protein 1, mitochondrial             | MICU1     | 3170100 | INFINITE |
| Q9UL40    | Zinc finger protein 346                             | ZNF346    | 3083700 | INFINITE |
| P20226;Q6 | TATA-box-binding protein;TATA box-binding protei    | TBP;TBPL2 | 2899700 | INFINITE |
| Q8N2M8    | CLK4-associating serine/arginine rich protein       | CLASRP    | 2817000 | INFINITE |
| Q96N21    | AP-4 complex accessory subunit tepsin               | ENTHD2    | 2659200 | INFINITE |
| Q9UI43    | rRNA methyltransferase 2, mitochondrial             | FTSJ2     | 2527900 | INFINITE |
| O43293    | Death-associated protein kinase 3                   | DAPK3     | 2467400 | INFINITE |
| Q9UIG0    | Tyrosine-protein kinase BAZ1B                       | BAZ1B     | 2436600 | INFINITE |
| Q6ZVX7    | F-box only protein 50                               | NCCRP1    | 2349000 | INFINITE |
| Q6IPR1    | LYR motif-containing protein 5                      | LYRM5     | 2024200 | INFINITE |
| Q9HA92    | Radical S-adenosyl methionine domain-containing     | RSAD1     | 1913500 | INFINITE |
| Q9NZM5    | Glioma tumor suppressor candidate region gene 2     | GLTSCR2   | 1746000 | INFINITE |
| O43240    | Kallikrein-10                                       | KLK10     | 1660800 | INFINITE |
| Q8TDX5    | 2-amino-3-carboxymuconate-6-semialdehyde decar      | ACMSD     | 1181800 | INFINITE |
| O00287    | Regulatory factor X-associated protein              | RFXAP     | 0       |          |
| O14569    | Cytochrome b561 domain-containing protein 2         | CYB561D2  | 0       |          |
| O15116    | U6 snRNA-associated Sm-like protein LSm1            | LSM1      | 0       |          |
| O15357    | Phosphatidylinositol 3,4,5-trisphosphate 5-phosph   | INPPL1    | 0       |          |
| O43548    | Protein-glutamine gamma-glutamyltransferase 5       | TGM5      | 0       |          |
| O60331    | Phosphatidylinositol 4-phosphate 5-kinase type-1    | PIP5K1C   | 0       |          |
| O75376    | Nuclear receptor corepressor 1                      | NCOR1     | 0       |          |
| P10412    | Histone H1.4                                        | HIST1H1E  | 0       |          |
| P32856    | Syntaxin-2                                          | STX2      | 0       |          |
| P41226    | Ubiquitin-like modifier-activating enzyme 7         | UBA7      | 0       |          |
| P41229    | Lysine-specific demethylase 5C                      | KDM5C     | 0       |          |
| P49137    | MAP kinase-activated protein kinase 2               | MAPKAPK2  | 0       |          |
| P57768    | Sorting nexin-16                                    | SNX16     | 0       |          |
| Q07352    | Zinc finger protein 36, C3H1 type-like 1            | ZFP36L1   | 0       |          |
| Q53GL0    | Pleckstrin homology domain-containing family O or   | PLEKHO1   | 0       |          |
| Q53LP3    | Ankyrin repeat domain-containing protein SOWAH      | SOWAHC    | 0       |          |
| Q55QN1    | Synaptosomal-associated protein 47                  | SNAP47    | 0       |          |
| Q55R56    | Hippocampus abundant transcript-like protein 1      | HIATL1    | 0       |          |
| Q5T1V6    | Probable ATP-dependent RNA helicase DDX59           | DDX59     | 0       |          |
| Q5T750    | Skin-specific protein 32                            | XP32      | 0       |          |
| Q6B0K9    | Hemoglobin subunit mu                               | HBM       | 0       |          |
| Q6P1Q9    | Methyltransferase-like protein 2B                   | METTL2B   | 0       |          |
| Q86VQ3    | Thioredoxin domain-containing protein 2             | TXNDC2    | 0       |          |
| Q8IVV2    | Lipoxygenase homology domain-containing protei      | LOXHD1    | 0       |          |
| Q8IW75    | Serpin A12                                          | SERPINA12 | 0       |          |
| Q8IWT6    | Volume-regulated anion channel subunit LRRC8A       | LRRC8A    | 0       |          |
| Q92685    | Dol-P-Man:Man(5)GlcNAc(2)-PP-Dol alpha-1,3-mar      | ALG3      | 0       |          |
| Q96S94    | Cyclin-L2                                           | CCNL2     | 0       |          |
| Q9BUL5    | PHD finger protein 23                               | PHF23     | 0       |          |
| Q9UL33    | Trafficking protein particle complex subunit 2-like | TRAPPC2L  | 0       |          |
| Q9UNK0    | Syntaxin-8                                          | STX8      | 0       |          |
